# Supplementary material for: WAX INDUCER 1 Regulates β-Diketone Biosynthesis by Mediating Expression of the Cer-cqu Gene Cluster in Barley
Source: MDPI journal article supplement (doi:10.3390/ijms24076762), 2023-04-05
Supplement: s1 [file s1]

## Supporting Information tables

Article title: WAX INDUCER 1 regulates  $\beta$ -diketone biosynthesis by mediating expression of the *Cer-cqu* gene cluster in barley

The following Supporting Information is available for this article:

**Table S1.** General phenotyping of *win1* KO lines as compared to the wild-type.

**Table S2.** Chemical composition of cuticular waxes detected on barley leaf blades and stems after derivatization.

**Table S3.** Differential expression of all barley genes in all four performed comparisons (see separate file).

**Table S4.** Information about *Cer-cqu* cluster and related genes located at chromosome 2H (see separate file).

**Table S5.** Barley homologues of *Arabidopsis thaliana* genes involved in wax biosynthesis (see separate file).

**Table S6.** Expression (rpkm-normalized counts) of putative WIN1-regulated genes (see separate file).

**Table S7.** Primers used in the study.

**Table S8.** Counts per million mapped read (CPM)-normalized counts of gene expression obtained using the edgeR software package (see separate file).

**Table S9.** Raw counts of gene expression obtained using DART mapper and featureCounts function of the Subread package (see separate file).

**Table S1.** General phenotyping of win1 KO lines as compared to the wild-type with standard deviations being indicated.

| Trait                     | Control line | Win1 KO lines |              |              |
|---------------------------|--------------|---------------|--------------|--------------|
|                           | WT           | 17-4-14       | 25-2-2       | 25-2-18      |
| Spikelet number per spike | 11.8 ± 0.6   | 12.8 ± 1.0    | 12.4 ± 0.8   | 12 ± 1.3     |
| Spike length, cm          | 8.7 ± 0.9    | 8.7 ± 0.3     | 8.6 ± 0.9    | 8.8 ± 0.9    |
| Grain number per spike    | 14 ± 4.6     | 18.6 ± 3.2    | 17.2 ± 3     | 16.8 ± 4     |
| Grain number per plant    | 111.3 ± 33.8 | 139.9 ± 48.8  | 122.4 ± 24.3 | 100.3 ± 32.4 |
| Grain weight per spike, g | 0.66 ± 0.2   | 0.6 ± 0.24    | 0.78 ± 0.13  | 0.76 ± 0.17  |
| Grain weight per plant, g | 4.12 ± 0.81  | 4.64 ± 1.87   | 5.37 ± 1.36  | 4.44 ± 1.63  |
| 1000-grain weight, g      | 38.1 ± 5.4   | 32.7 ± 4.2    | 43.6 ± 4.7   | 43.5 ± 4.5   |
| Plant height, cm          | 62.5 ± 4.6   | 65.1 ± 4.2    | 66.5 ± 3.1   | 64.8 ± 4.4   |
| Total number of tillers   | 9.1 ± 2.7    | 9.9 ± 2.6     | 8.6 ± 1.8    | 7.4 ± 3.1    |
| Number of fertile tillers | 7.9 ± 2.3    | 8 ± 2.7       | 7.9 ± 1.8    | 6.6 ± 2.5    |

**Table S2.** Chemical composition of cuticular waxes detected on barley leaf blades and stems after derivatization.

|                                       |                                    |      | Content [µg/cm²] |             |             |             |
|---------------------------------------|------------------------------------|------|------------------|-------------|-------------|-------------|
| IUPAC Name                            | Linear retention index (LRI), exp. |      | Leaf blade       |             | Stem        |             |
|                                       |                                    |      | Control n=4      | Mutant n=4  | Control n=4 | Mutant n=4  |
| Hydrocarbons                          |                                    |      |                  |             |             |             |
| 1.                                    | Pentacosane                        | 2500 | 0.029±0.009      | 0.018±0.003 | 0.05±0.01   | 0.025±0.008 |
| 2.                                    | Hexacosane                         | 2600 | 0.013±0.010      | 0.002±0.001 | 0.011±0.005 | 0.002±0.001 |
| 3.                                    | Octacosane                         | 2800 | 0.009±0.007      | 0.010±0.002 | 0.011±0.001 | 0.008±0.004 |
| 4.                                    | Nonacosane                         | 2900 | a                | a           | 0.044±0.006 | 0.052±0.010 |
| 5.                                    | Triacontane                        | 3100 | 0.010±0.004      | 0.006±0.004 | 0.017±0.005 | 0.008±0.003 |
| 6.                                    | Trtriacontane                      | 3300 | 0.021±0.008      | 0.020±0.005 | 0.010±0.003 | 0.006±0.002 |
| Saturated fatty acids methyl esters   |                                    |      |                  |             |             |             |
| 7.                                    | Hexadecanoic acid                  | 1928 | 0.34±0.12        | 0.19±0.04   | 0.33±0.08   | 0.16±0.02   |
| 8.                                    | Octadecanoic acid                  | 2128 | 0.17±0.06        | 0.12±0.02   | 0.35±0.07   | 0.07±0.01   |
| 9.                                    | Eicosanoic acid                    | 2329 | 0.25±0.04        | 0.28±0.05   | 0.93±0.16   | 0.14±0.01   |
| 10.                                   | Docosanoic acid                    | 2532 | 0.37±0.07        | 0.43±0.07   | 0.40±0.10   | 0.30±0.06   |
| 11.                                   | Tetracosanoic acid                 | 2731 | 0.19±0.03        | 0.21±0.02   | 0.16±10.04  | 0.08±0.02   |
| 12.                                   | Hexacosanoic acid                  | 2936 | 0.37±0.09        | 0.46±0.08   | 0.08±0.01   | 0.10±0.02   |
| 13.                                   | Octacosanoic acid                  | 3138 | 0.19±0.03        | 0.19±0.05   | 0.06±0.02   | 0.07±0.02   |
| 14.                                   | Triacontanoic acid                 | 3342 | 0.11±0.02        | 0.11±0.02   | 0.04±0.01   | 0.05±0.02   |
| 15.                                   | Dotriacontanoic acid               | 3542 | 0.06±0.01        | 0.06±0.01   | 0.07±0.02   | 0.03±0.01   |
| 16.                                   | Tetratriacontanoic acid            | 3741 | 0.04±0.01        | 0.03±0.01   | 0.04±0.01   | 0.02±0.01   |
| Unsaturated fatty acids methyl esters |                                    |      |                  |             |             |             |
| 17.                                   | Octadecenoic acid                  | 2098 | 0.06±0.02        | 0.02±0.01   | 0.22±0.07   | 0.04±0.02   |
| 18.                                   | Octadecadienoic acid               | 2092 | 0.03±0.01        | 0.01±0.01   | 0.04±0.01   | 0.03±0.01   |
| 19.                                   | Octadecatrienoic acid              | 2098 | 0.06±0.02        | 0.02±0.01   | 0.07±0.04   | 0.04±0.01   |
| Aldehydes                             |                                    |      |                  |             |             |             |
| 20.                                   | Hexacosanal                        | 2833 | 0.72±0.15        | 0.49±0.03   | 0.16±0.04   | 0.10±0.03   |
| 21.                                   | Octacosanal                        | 3043 | 0.72±0.18        | 0.54±0.10   | 0.12±0.05   | 0.08±0.02   |
| 22.                                   | Triacontanal                       | 3244 | 0.04±0.01        | <0.01       | 0.023±0.006 | 0.036±0.014 |
| 23.                                   | Dotriacontanal                     | 3452 | <0.01            | <0.01       | 0.18±0.09   | 0.02±0.01   |
| 24.                                   | Tetratriacontanal                  | 3652 | <0.01            | <0.01       | 0.10±0.04   | 0.007±0.005 |
| Alkan-2-ols                           |                                    |      |                  |             |             |             |
| 25.                                   | Tridecan-2-ol                      | 1503 | b                | b           | 0.16±0.05   | 0.002±0.001 |

|                         |                                       |      |           |           |           |             |
|-------------------------|---------------------------------------|------|-----------|-----------|-----------|-------------|
| 26.                     | Pentadecan-2-ol                       | 1704 | b         | b         | 0.22±0.05 | 0.007±0.001 |
| <i>Alkan-1-ols</i>      |                                       |      |           |           |           |             |
| 27.                     | Docosan-1-ol                          | 2489 | 0.44±0.11 | 0.34±0.07 | 0.18±0.04 | 0.33±0.07   |
| 28.                     | Tetracosan-1-ol                       | 2694 | 0.63±0.09 | 0.34±0.07 | 0.12±0.06 | 0.35±0.07   |
| 29.                     | Hexacosan-1-ol                        | 2901 | 10.8±1.1  | 7.7±0.7   | 1.1±0.2   | 1.6±0.3     |
| 30.                     | Octacosan-1-ol                        | 3103 | 0.51±0.09 | 0.43±0.04 | b         | 0.18±0.05   |
| 31.                     | Triacontan-1-ol                       | 3309 | 0.12±0.02 | 0.09±0.02 | b         | 0.03±0.01   |
| <i>β-diketones</i>      |                                       |      |           |           |           |             |
| 32.                     | Hentriacontane-14,16-dione            | 3395 | b         | b         | 29.7±2.8  | 1.7±0.5     |
| 33.                     | 25-Hydroxy-hentriacontane-14,16-dione | 3586 | b         | b         | 1.7±0.5   | b           |
| <i>Alkylresorcinols</i> |                                       |      |           |           |           |             |
| 34.                     | 3-Methoxy-5-pentadecylphenol          | 2718 | b         | b         | a         | a           |
| 35.                     | 3-Methoxy-5-heptadecylphenol          | 2935 | b         | b         | 0.36±0.12 | 0.04±0.01   |
| 36.                     | 3-Methoxy-5-nonadecylphenol           | 3144 | b         | b         | 0.20±0.08 | 0.007±0.004 |
| 37.                     | 3-Methoxy-5-heneicosylphenol          | 3351 | b         | b         | c         | c           |
| 38.                     | 2-Methyl-5-nonadecyl-1,3-benzenediol  | 3268 | 0.04±0.01 | 0.05±0.03 | b         | 0.06±0.02   |
| 39.                     | 2-Methyl-5-heneicosyl-1,3-benzenediol | 3481 | 0.05±0.02 | 0.13±0.07 | b         | 0.03±0.01   |
| 40.                     | 2-Methyl-5-tricosyl-1,3-benzenediol   | 3687 | b         | 0.02±0.01 | b         | 0.01±0.01   |

<sup>a</sup> it was impossible to determine the individual contents due to overlapping peaks of the corresponding alcohols, <sup>b</sup> not found, <sup>c</sup> was identified below the limit of determination

**Table S3.** Differential expression of all barley genes in all four performed comparisons. Sheets:

lb\_win1-lb\_wt: comparison between leaf blade of *win1* knockout genotype and leaf blade of wild type plants; ls\_win1-ls\_wt: comparison between leaf sheath of *win1* knockout genotype and leaf sheath of wild-type plants; lb\_win1-ls\_win1: comparison between leaf blade of *win1* knockout plants and leaf sheath of *win1* knockout plants; lb\_wt-ls\_wt: comparison between leaf blade and leaf sheath of wild-type plants.

**Table S4.** Information about the *Cer-cqu* cluster and related genes located on chromosome 2H.

**Table S5.** Barley homologues of *Arabidopsis thaliana* genes involved in wax biosynthesis.**Table S6.** Expression (rpkm-normalized counts) of putative WIN1-regulated genes.**Table S7.** Hexamers enriched in promoters of WIN1-related genes. Sheets: leaf sheath wt upreg – hexamers enriched in promoters of genes up-regulated in wild-type leaf sheaths, leaf sheath wt downreg – hexamers enriched in promoters of genes down-regulated in wild-type leaf sheaths.**Table S7.** Primers used in the study.

| Gene id                                 | Primer      | Sequence               | Amplicon length [b] | Optimal annealing temperature [°C] |
|-----------------------------------------|-------------|------------------------|---------------------|------------------------------------|
| Primers used for target loci sequencing |             |                        |                     |                                    |
| HORVU6Hr1G038120<br>( <i>HvWIN1</i> )   | Win1_F      | CGTACTAAGTGACTCCAGCAG  | 450                 | 60                                 |
|                                         | Win1_R      | TAAACCGGCGAAGAAACCAC   |                     |                                    |
| HORVU6Hr1G085850                        | 6H_gene_F   | GAGAAGTCCGAGTCTAGCAG   | 960                 | 59                                 |
|                                         | 6H_gene_R   | AAACGGGCTAAACAAAGATGTC |                     |                                    |
| HORVU7Hr1G029870                        | 7H_gene_F   | TTTGCCAACTAAACGTGTCACC | 530                 | 62                                 |
|                                         | 7H_gene_R   | CAATCGCAGAGCCTTTCGAC   |                     |                                    |
| HORVU7Hr1G089930<br>( <i>HvNUD</i> )    | Hv_Nud_1exF | AGCGTAGGTGTATACGCATCCG | 1000                | 58                                 |
|                                         | Hv_Nud_R2   | CAATGTGGGACTTCTCGGTG   |                     |                                    |
| Primers used for qRT-PCR                |             |                        |                     |                                    |
| HORVU2Hr1G002570                        | 2570_F1     | AGACGACCTGCTTGGGCAAATG | 116                 | 60                                 |
|                                         | 2570_R1     | CGTAACCAGCCGCGAAGAAAG  |                     |                                    |
| HORVU2Hr1G002580                        | 2580_F1     | CGGGTTGCGGTTCTTTGTCAC  | 174                 | 62.5                               |
|                                         | 2580_R1     | GCCCTTTACTTTTGCGCGCTG  |                     |                                    |
| HORVU2Hr1G002610                        | 2610_F1     | GGCCCCATAGCTTTCCTGCA   | 74                  | 60                                 |

|                                     |         |                         |     |    |
|-------------------------------------|---------|-------------------------|-----|----|
| HORVU2Hr1G002620                    | 2610_R1 | G TTCCTTTCGGCACCTTCACG  | 117 | 60 |
|                                     | 2620_F1 | TATCCCGTAGGTACCCGTCA    |     |    |
|                                     | 2620_R1 | GGCCATCCTTGTACTTGCGG    |     |    |
| HORVU2Hr1G002630                    | 2630_F1 | TTGCCGGCGTGTGGTTTACG    | 129 | 60 |
|                                     | 2630_R1 | CATGGTAGTGTGCGTAAGCGC   |     |    |
| HORVU2Hr1G002640                    | 2640_F1 | TCCGTCTCTCAAACCCTCGTG   | 102 | 60 |
|                                     | 2640_R1 | CAGTGTGGGCAGTTTGGTGTA   |     |    |
| HORVU2Hr1G002650                    | 2650_F1 | GTGAAGGTGCCGAAAGGAACG   | 135 | 60 |
|                                     | 2650_R1 | GACACAGACCCTCGGCCC      |     |    |
| HORVU3Hr1G085520                    | 5520_F1 | CGCTCAACACGCACCTCTTC    | 89  | 60 |
|                                     | 5520_R1 | CGTGGTGTAGTTGGCGGTGTA   |     |    |
| HORVU3Hr1G086160                    | 6160_F3 | GGCCCCATCGTCATCCTCC     | 100 | 61 |
|                                     | 6160_R3 | CCTCCGTGTCCGCCTTCC      |     |    |
| HORVU3Hr1G086200                    | 6200_F4 | CCGCAGCCTCGCCACAAAAC    | 77  | 62 |
|                                     | 6200_R4 | TCTTGGGGCAGGGGAGCG      |     |    |
| HORVU1Hr1G087320                    | 7320_F1 | GCTCACGCTCGACCAGGG      | 147 | 60 |
|                                     | 7320_R1 | TCGCCCTCCCAGACGTC       |     |    |
| HORVU6Hr1G075900                    | 5900_F1 | CGGGAGGCGTTCGTGGAG      | 124 | 60 |
|                                     | 5900_R1 | TGGTGTGACGGCGAGCTTG     |     |    |
| HORVU3Hr1G077960                    | 7960_F1 | GGCGCTGGTGCTGGATCAAAG   | 65  | 60 |
|                                     | 7960_R1 | CTCTTTCTTCCGTTGCGCTGC   |     |    |
| HORVU2Hr1G032710                    | 2710_F1 | AGCCAGCAAGAACCACCGAGAA  | 165 | 60 |
|                                     | 2710_R1 | CAGACTTGATTGAGCCCTTGC   |     |    |
| HORVU7Hr1G098280                    | 8280_F1 | TCCGGGTTCCAGTCCAAGCA    | 70  | 60 |
|                                     | 8280_R1 | GCCGGGGACGAGCTTGAG      |     |    |
| HORVU5Hr1G046520                    | 6520_F1 | ACCACCACCCACTCATCTG     | 162 | 60 |
|                                     | 6520_R1 | GAGTCCACCTGCCCGCAC      |     |    |
| Primers used for transgene analysis |         |                         |     |    |
|                                     | Cas9_F  | GACGATGACCTGGATAACCT    | 300 | 58 |
|                                     | Cas9_R  | GATGAACTTGTAAGAACTCCTCT |     | 58 |

**Table S8.** Counts per million mapped read (CPM)-normalized counts of gene expression, obtained using the edgeR software package, raw data. lb\_win1, lb\_wt – leaf blade wild-type and *win1* KO respectively; ls\_wt, ls\_win1 – leaf sheath wild-type and *win1* KO respectively. Numbers represent biological replicates.

**Table S9.** Raw counts of gene expression obtained using DART mapper and featureCounts function of the Subread package. lb\_win1, lb\_wt – leaf blade wild-type and *win1* KO respectively; ls\_wt, ls\_win1 – leaf sheath wild-type and *win1* KO respectively. Numbers represent biological replicates.
