# Supplementary material for: WAX INDUCER 1 Regulates β-Diketone Biosynthesis by Mediating Expression of the Cer-cqu Gene Cluster in Barley
Source: MDPI journal article supplement (doi:10.3390/ijms24076762), 2023-04-05
Supplement: s1 [file s1]

## Supporting Information figures

Article title: WAX INDUCER 1 regulates  $\beta$ -diketone biosynthesis by mediating expression of the *Cer-cqu* gene cluster in barley

The following Supporting Information is available for this article:

**Figure S1.** Developmental progress of the *win1* KO isogenic lines.

**Figure S2.** Dominant/recessive test.

**Figure S3.** The pattern of wax accumulation at all examined surfaces.

**Figure S4.** Chemical composition of cuticle wax in reproductive shoots of wild-type (WT) and *win1* knockout (KO) plants after derivatization.

**Figure S5.** Total ion chromatograms of wax samples.

**Figure S6.** Mass spectra of  $\beta$ -diketones.

**Figure S7.** Fragment of the chromatogram reconstruction for *win1* KO stem wax sample by the characteristic ion for alkylresorcinols ( $m/z$  138) and mass spectra of some alkylresorcinols.

**Figure S8.** Verification of the RNA-seq results.

**Figure S9.** Amino acid sequence comparison between ScARS and putative HvARS.

**Figure S1.** Developmental progress of the *win1* KO isogenic lines.

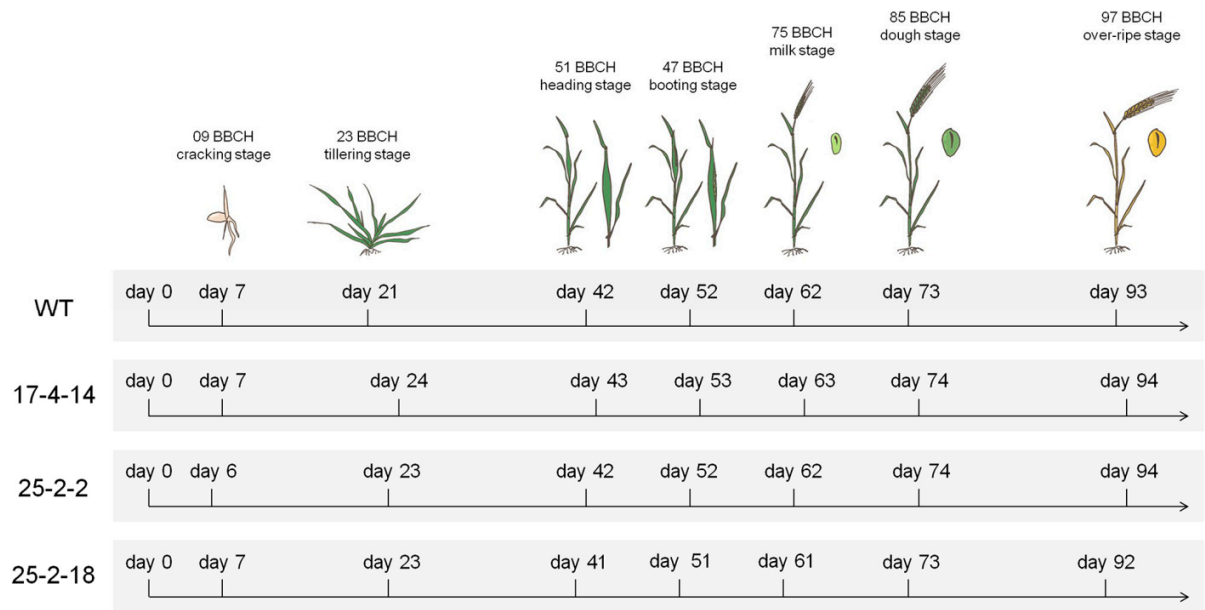

**Figure S2.** Dominant/recessive test. (a) Scheme of crossing. (b) *WIN1* target site Sanger chromatograms of parents and F1 hybrid, protospacer adjacent motif (PAM) is shown in red bar.

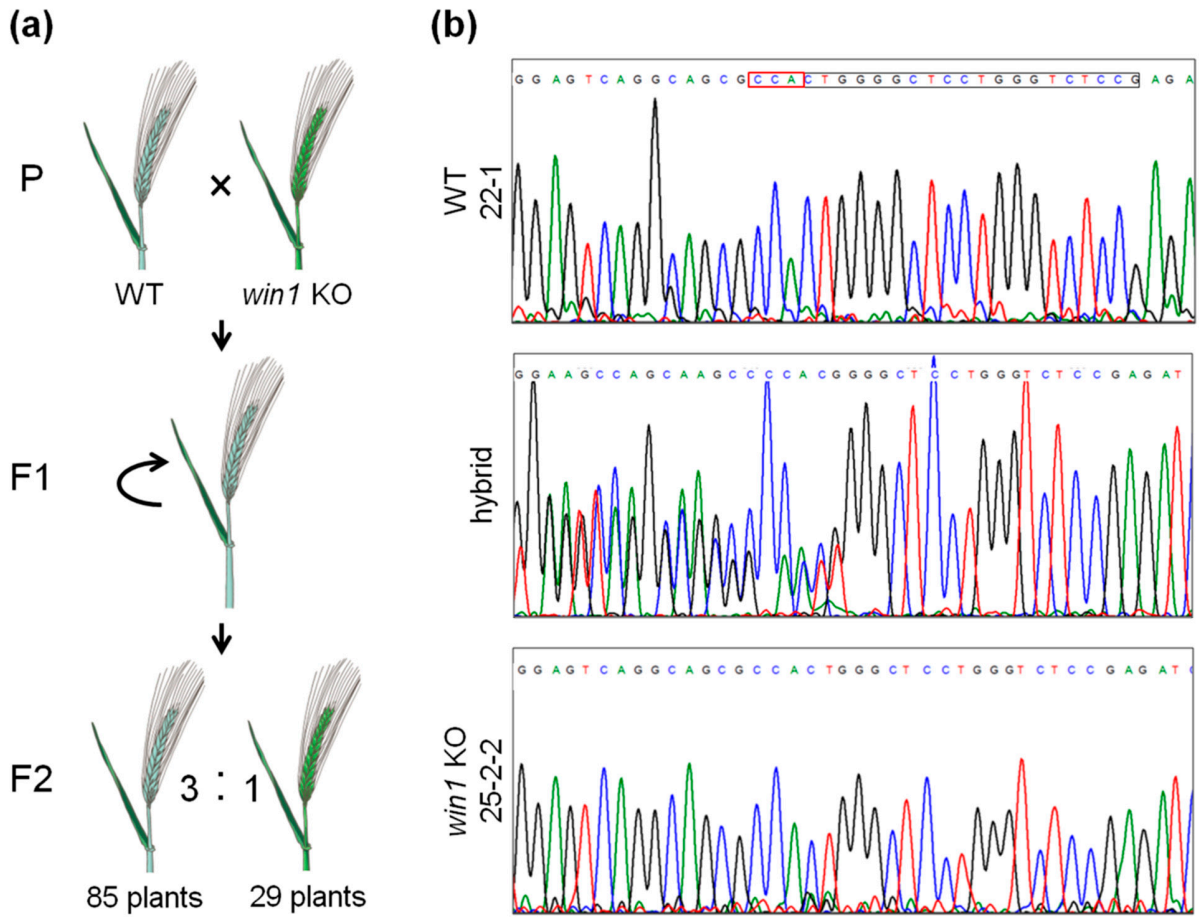

**Figure S3.** The pattern of wax accumulation at all examined surfaces. WT – wild type, *win1* KO – *win1* knockout, BBCH code is given according to Zadoks *et al.* (1974)

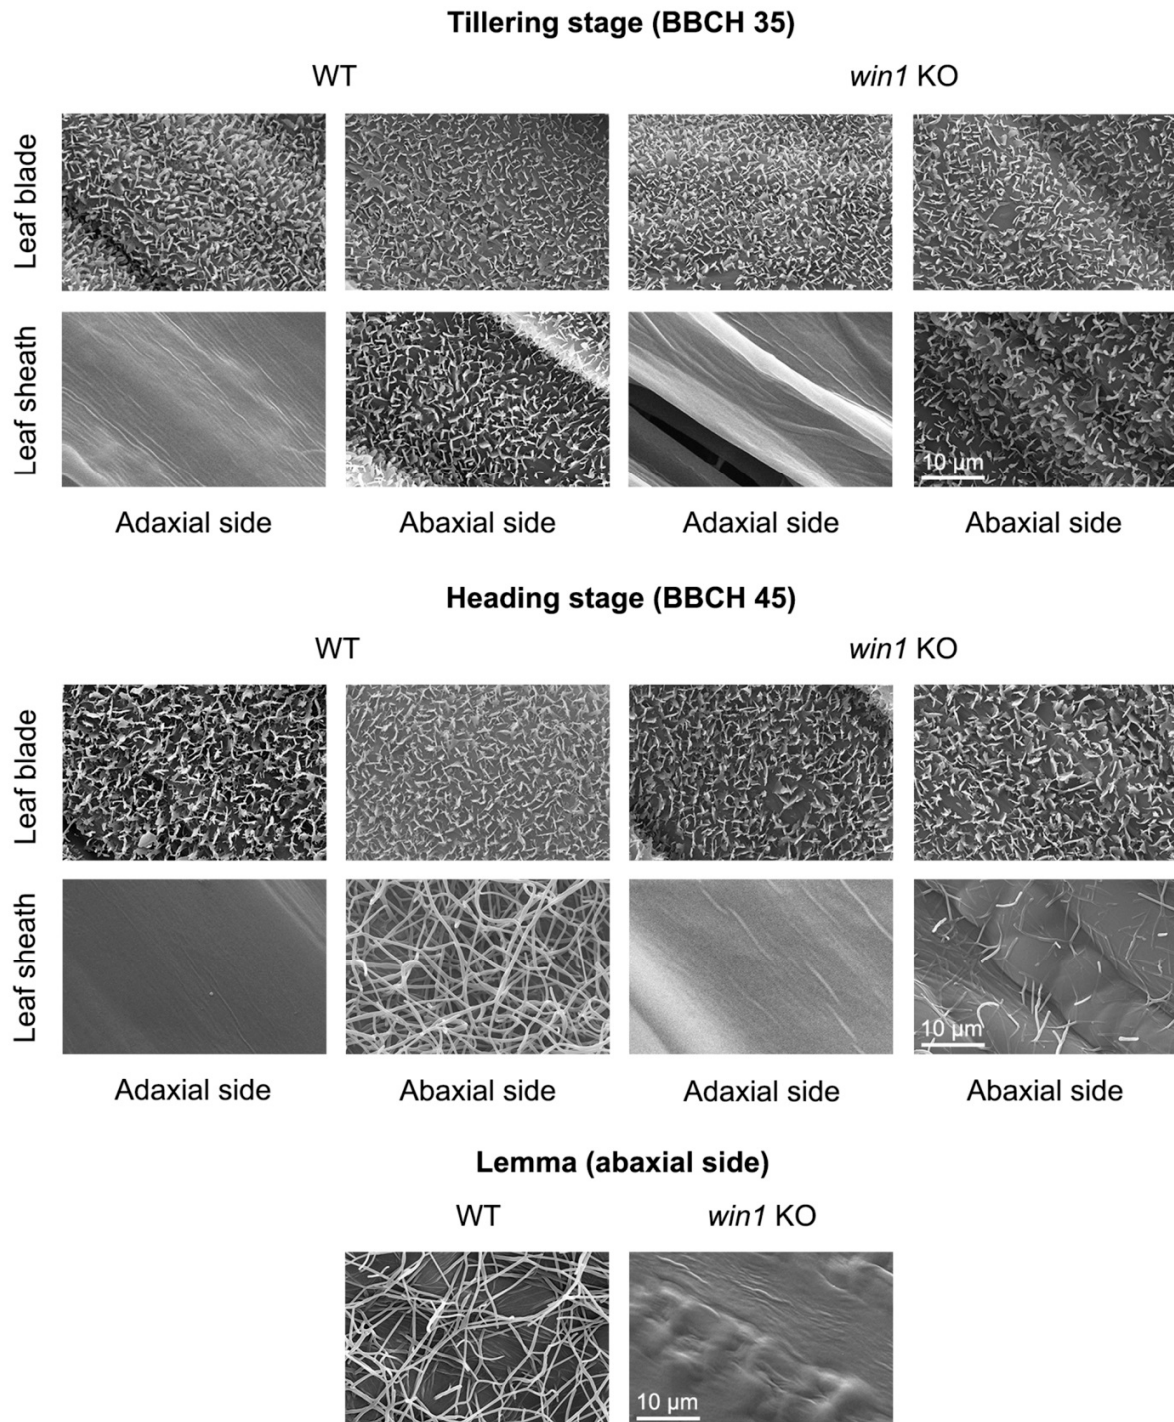

**Figure S4.** Chemical composition of cuticle wax in reproductive shoots of wild-type (WT) and *win1* knockout (KO) plants after derivatization, lb – leaf blade, st – stem, FAME – fatty acid methyl esters, HC – hydrocarbons, Ald – aldehydes, Alk – alkan-1-ols or alkan-2-ols,  $\beta$ -diketone - hentriacontane-14,16-dione, OH- $\beta$ -diketone - 25-hydroxy-hentriacontane-14,16-dione, AR-1-17 – 3-methoxy-5-heptadecylphenol; AR-1-19 – 3-methoxy-5-nonadecylphenol; MAR-2-19 – 2-methyl-5-nonadecyl-1,3-benzenediol; MAR-2-21 – 2-methyl-5-heneicosyl-1,3-benzenediol, numbers in compound codes correspond to carbon atom numbers and positions of groups, asterisks show significant differences (\* - p value <0.05).

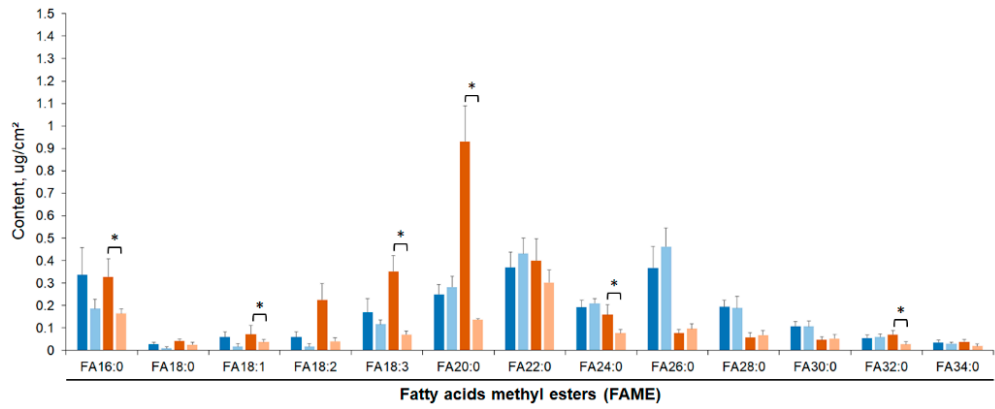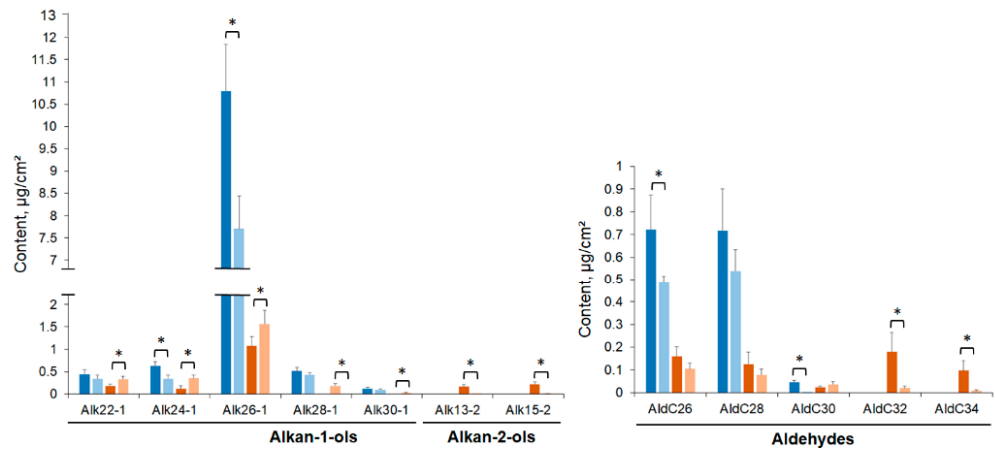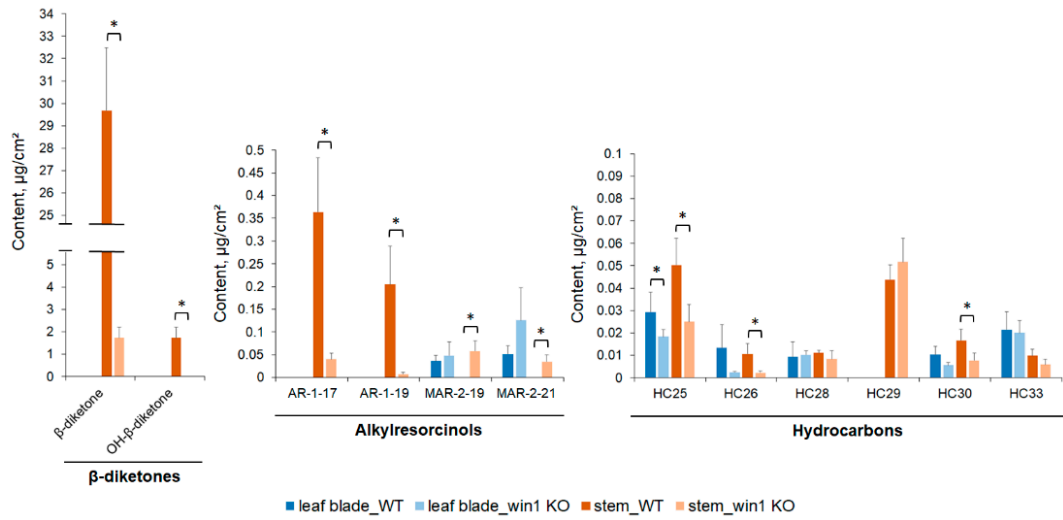

■ leaf blade\_WT ■ leaf blade\_win1 KO ■ stem\_WT ■ stem\_win1 KO

**Figure S5.** Total ion chromatograms of wax samples. (a) Wild-type leaf blades (b) Wild-type stems (c) *win1* knockout leaf blades (d) *win1* knockout stems. The numbering is shown with major peaks only. The numbering of the peaks corresponds to the numbering in the table S6.

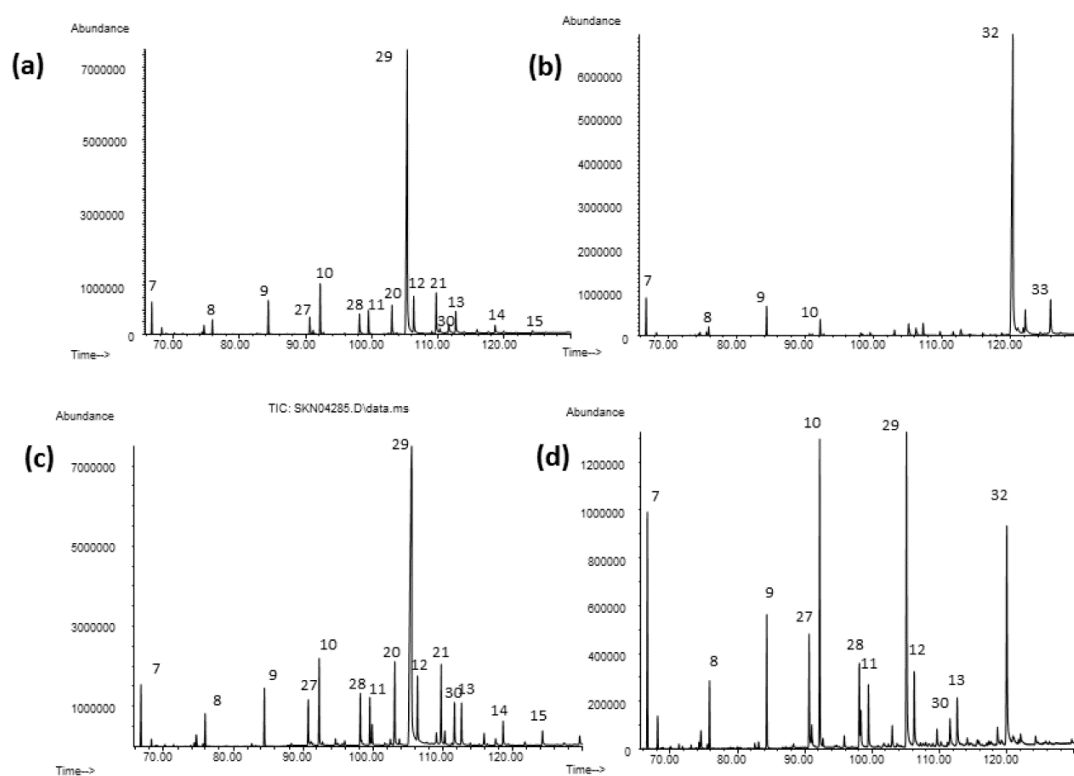

**Figure S6.** Mass spectra of  $\beta$ -diketones. (a) Nonacosane-14,16-dione (M436) (b) Hentriacontane-14,16-dione (M464) (c) Tritriacontane-16,18-dione (M492).

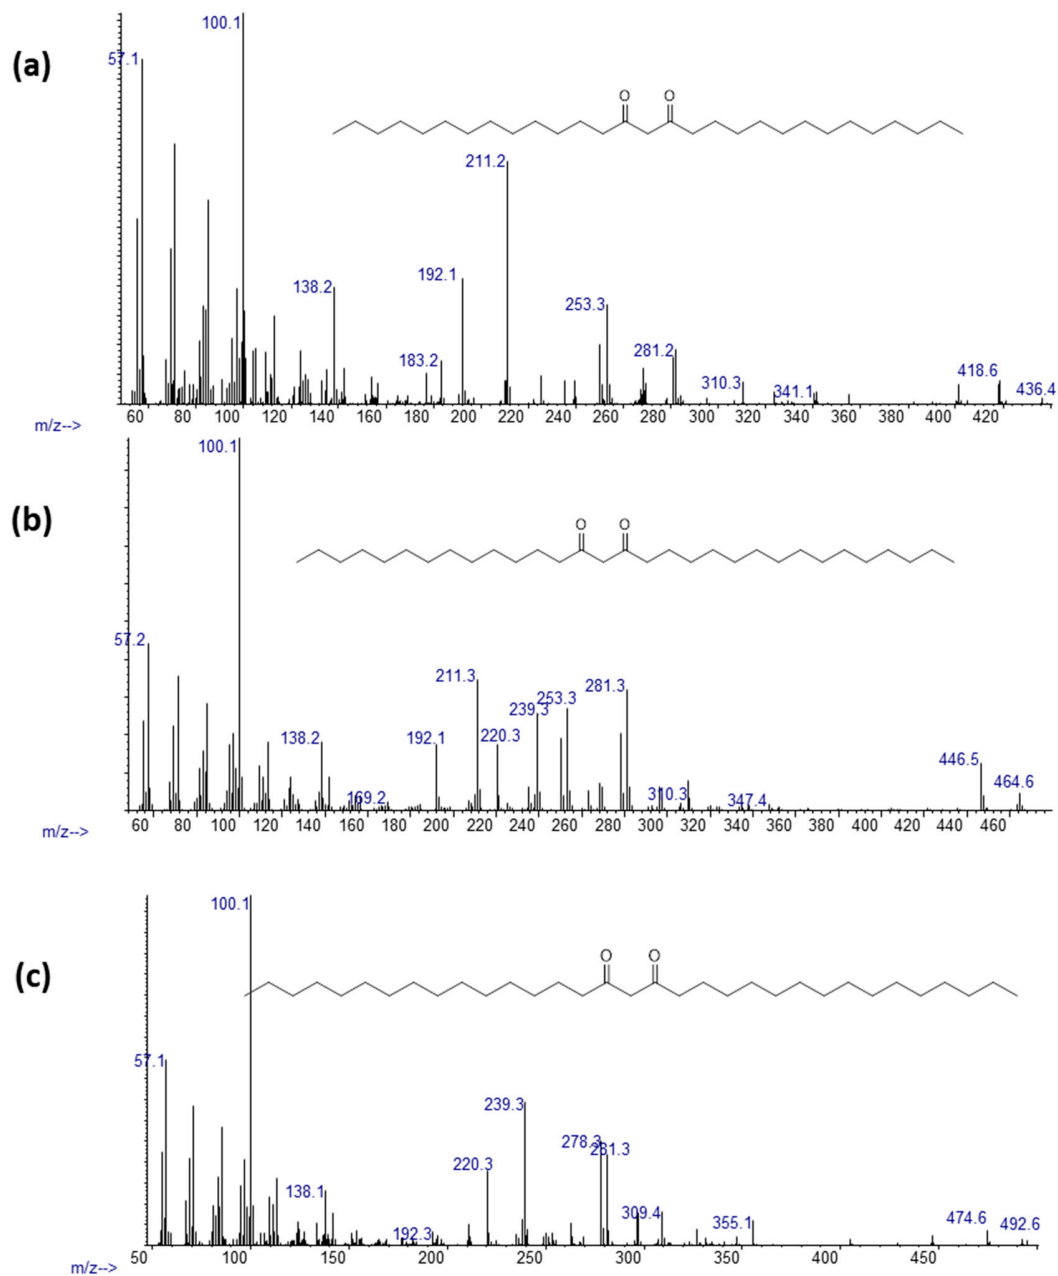



**Figure S7.** (a) Fragment of the chromatogram reconstruction for *win1* KO stem wax sample by the characteristic ion for alkylresorcinols ( $m/z$  138) and mass spectra of some alkylresorcinols AR-1-15 – 3-Methoxy-5-pentadecylphenol; AR-1-17 – 3-methoxy-5-heptadecylphenol; AR-1-19 – 3-methoxy-5-nonadecylphenol; AR-1-21 – 3-methoxy-5-heneicosylphenol; MAR-2-19 – 2-methyl-5-nonadecyl-1,3-benzenediol; MAR-2-21 – 2-methyl-5-heneicosyl-1,3-benzenediol; MAR-2-23 – 2-methyl-5-tricosyl-1,3-benzenediol; (b) mass spectrum of AR-1-15, (c) mass spectrum of AR-1-19, (d) mass spectrum of MAR-2-21, (e) mass spectrum of MAR-2-23.

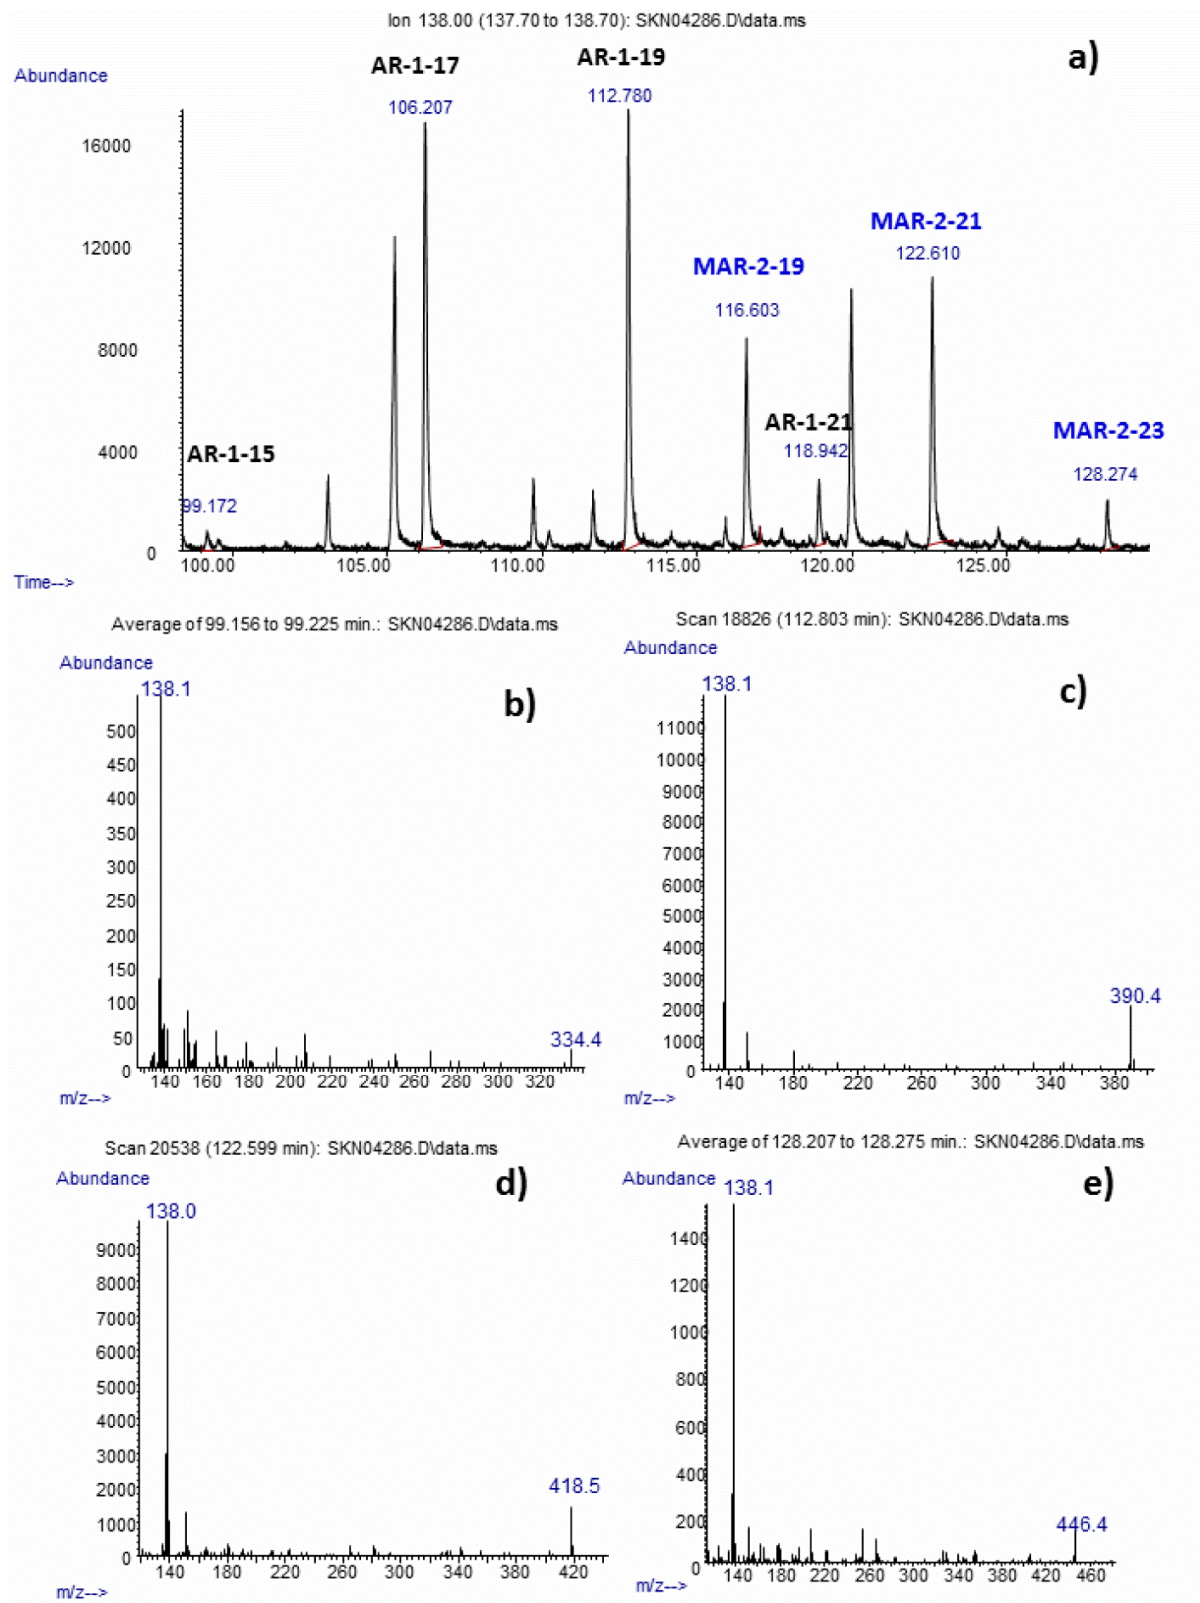

**Figure S8.** Verification of the RNA-seq results. qRT-PCR results are shown by bars, RNA-seq results by lines, related to Figure 3. Standard deviations are shown for each case. lb\_win1, lb\_wt – leaf blade wild-type and *win1* KO respectively; ls\_wt, ls\_win1 – leaf sheath wild-type and *win1* KO respectively.

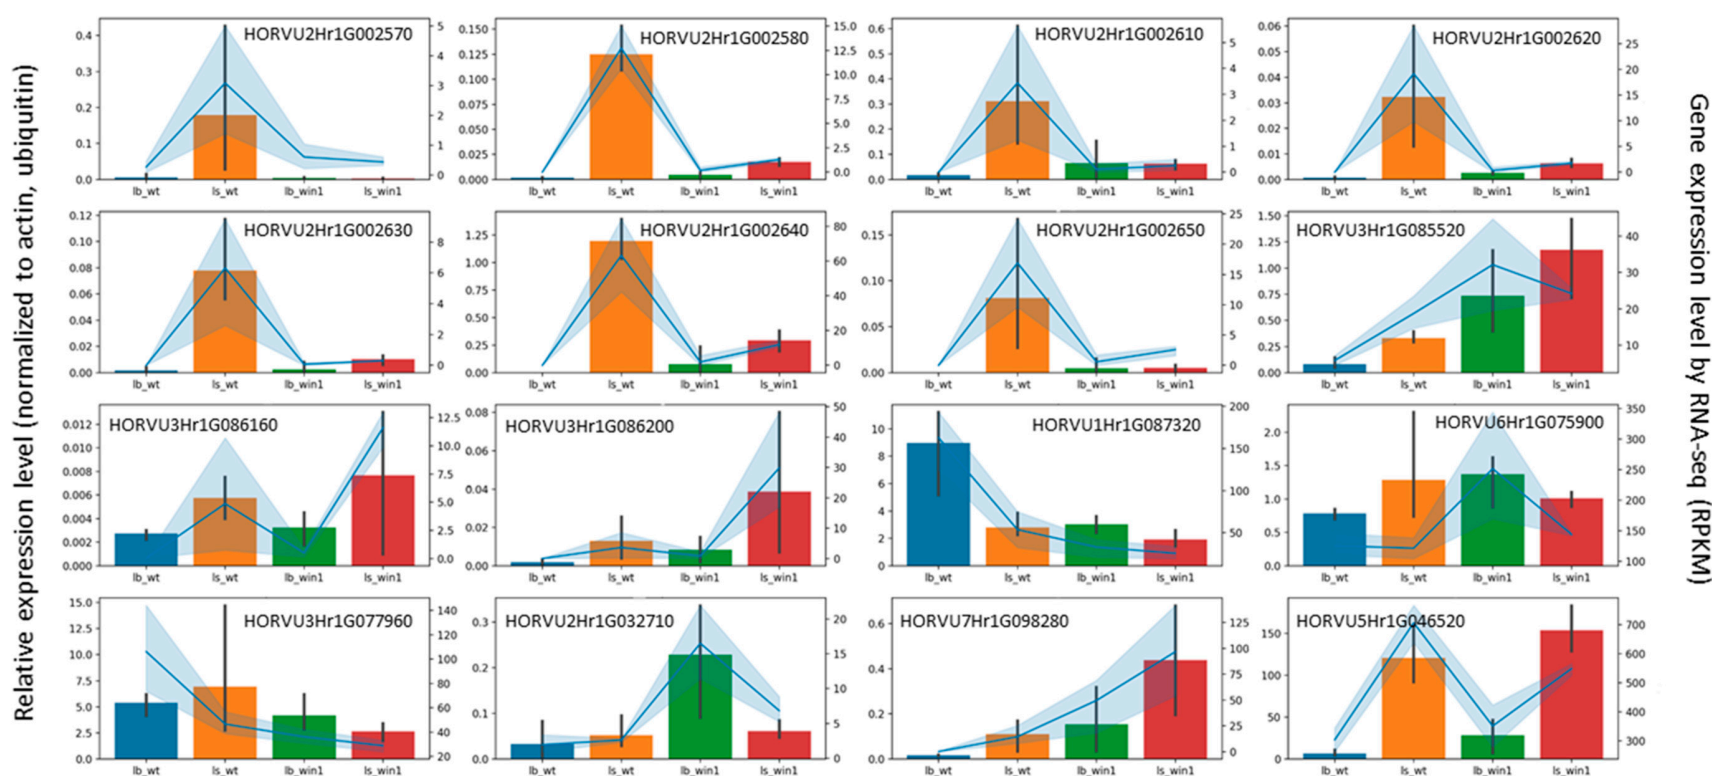



**Figure S9.** Amino acid sequence comparison between ScARS and putative HvARS.

```

HvARS      -----MGMRQHGEPAAMLAIGTANPTNL-LPQDVFADNFFRMTKSD 41
ScARS      MGSIGTTNGNGIGHGSAAVARRQHAEGPAAMLGIGTANPTGVEVPQNIFAENLFRVTKSD 60
           :.  ***.*****.*****.: :*:*:*:*:*:*:*:

HvARS      HLTQLKEKMNRICEKTGIEKRHFHLEDTLGVHPEFLDRDLPSLDARIEAATAVPKLAQ 101
ScARS      HLTQLKLTRICEKTGIDKRHFHLEETLAAHPELYDHEAPSLDNRIAMTVDAVPKLAQ 120
           ***:*: *:*****:*****:*.***: *: :*** ** *:*****

HvARS      SAATKAIAEWGRPATDITHLVFSTYSANEAPSADLKLATLLGLPPTVCRILSLHGCGYGG 161
ScARS      CAAAKAIAEWGRPASEITHLVFSTYSANGAPSADLRLLAALLGLRPTVSRILSLHGCGYGG 180
           .**:*:*****: :***** *****:*.*** ** *:*****

HvARS      GRALHLAKELAENNRGARVLVACAETTLVCLGSPDGANLVGYALFGDGAGAVIVGAGPFG 221
ScARS      GRALGLARELAENNRGARVLVACAEITLVCFGGPDGGNVLGHALFGDGAGAVIVGAGPFR 240
           **** *:***** *****:*.*** ** *:*****

HvARS      EGE-RPLFEMVSATQTTIPRTEHVLGMQATAGGIDFHLAIQVPMILIGQNVERCLLDAGFD 280
ScARS      DGEQSPIFEMVHATQTTVPKTEHVLGMQVSGSGVDFHLAIQVPTLIGQNVERCLLDAGFRG 300
           :** *:*** *****:*****:*.*** ** *:***** *****

HvARS      D-----APCDWNELFWAVHPGGRPILDNIDTVLKLDTGKLAASRHVL 322
ScARS      GDDGGDDDDGAHLPSPLSGNGKWNDFWAVHPGGRPILDNIDKVLQLEPEKLGASRHVL 360
           .          .  .**:*:*****.***:*.*** ** *:*****

HvARS      REYGNMSGATIVFVLDELRRRRKEEDNGHLLPEWGAMLAFGPGITITMVLRSRPR 377
ScARS      REYGNMSGATIVFVLDELRRRR-----SLLPEWGAMLAFGPGVTITMVLRCPR 409
           ***** *****:*****.***

```
