# Supplementary material for: WAX INDUCER 1 Regulates β-Diketone Biosynthesis by Mediating Expression of the Cer-cqu Gene Cluster in Barley
Source: Int J Mol Sci. 2023 Apr 5;24(7):6762. doi: 10.3390/ijms24076762 (PMC10095013; doi:10.3390/ijms24076762)
Supplement: Supplementary file 1 [file ijms-24-06762-s001.zip]

Archive with 9 entries (9 files):
- Supplementary Materials Figures.pdf
- Supplementary Materials Methods.pdf
- Supporting_information_tables_corr.pdf
- Table_S3_DEGs.xlsx
- Table_S4_clustered_genes.xlsx
- Table_S5_wax_synthesis_genes.xlsx
- Table_S6_win1_candidates.xlsx
- Table_S8_CPMs.csv
- Table_S9_counts.csv
