# Supplementary material for: WAX INDUCER 1 Regulates β-Diketone Biosynthesis by Mediating Expression of the Cer-cqu Gene Cluster in Barley
Source: Int J Mol Sci. 2023 Apr 5;24(7):6762. doi: 10.3390/ijms24076762 (PMC10095013; doi:10.3390/ijms24076762)
Supplement: Supplementary file 1 [file ijms-24-06762-s001.zip › Table_S3_DEGs.xlsx]

## Sheet: description
Supporting Information
Article title: WAX INDUCER 1 regulates β-diketone biosynthesis by medi-ating expression of the cer-cqu gene cluster in barley
Authors: Sophia V. Gerasimova, Ekaterina V. Kolosovskaya, Alexander V. Vikhorev, Anna M. Korotkova, Christian W. Hertig, Mikhail A. Genaev, Dmitry V. Domrachev, Sergey V. Morozov, Elena I. Chernyak, Nikolay A. Shmakov, Gennady V. Vasilyev, Alex V. Kochetov, Jochen Kumlehn, Elena K. Khlestkina
Article acceptance date:
Table S3: Differential expression of all barley genes in all four performed comparisons.
list name	description
lb_win1-lb_wt	comparison between leaf blade of win1 knockout genotype and leaf blade of wild type plants
ls_win1-ls_wt	comparison between leaf sheath of win1 knockout genotype and leaf sheath of wild type plants
lb_win1-ls_win1	comparison between leaf blade of win1 knockout genotype and leaf sheath of win1 knockout genotype plants
lb_wt-ls_wt	comparison between leaf blade of wild type and leaf sheath of wild type plants
field name	description
gene	gene identifier from IBGSC genome annotation, as presented in Ensembl Plants database
log2(FC)	logarythmic value of expression values change
FDR	False discovery rate
note that in the listed comparisons, expression values of the first listed sample is compared to the expression values of the second listed sample
thus, positive values of log2(FC) mean up-regulation in the first listed sample, negative values mean down-regulation in the first listed sample compared to the second listed sample
e.g., gene AGP50745 has log2(FC) value -1,86 in comparison lb_win1-lb_wt, meaning it has lower expression value in lb_win1 than in lb_wt

## Sheet: lb_win1-lb_wt
gene	log2(FC)	FDR
AGP50735	-0.530038	0.163439
AGP50736	-0.964898	0.247168
AGP50737	-0.424879	0.227981
AGP50738	0.827868	0.328716
AGP50739	0.501005	0.679755
AGP50740	0.109148	0.618501
AGP50741	0.134581	0.563758
AGP50742	-0.454152	0.698172
AGP50743	-0.772323	0.225254
AGP50744	-0.673123	0.531444
AGP50745	-1.87463	0.00634031
AGP50746	-0.985159	0.098174
AGP50747	-0.529828	0.415424
AGP50748	-0.860076	0.211571
AGP50749	-0.161005	0.776307
AGP50750	0.682631	0.213619
AGP50751	0.0620665	0.891735
AGP50752	0.487964	0.145269
AGP50753	-0.296984	0.217984
AGP50754	-0.11805	0.687948
AGP50755	0.173067	0.639901
AGP50756	0.0911189	0.88366
AGP50757	0.429285	0.559183
AGP50758	-0.139113	0.799809
AGP50759	-0.357848	0.38731
AGP50760	-0.097877	0.849341
AGP50761	0.22715	0.666605
AGP50762	0.242789	0.6731
AGP50763	0.787751	0.167184
AGP50764	0	-
AGP50765	0.00432023	0.996177
AGP50766	-0.228932	0.748496
AGP50767	0.166252	0.73999
AGP50768	0.146958	0.721665
AGP50769	-0.186388	0.756295
AGP50770	0.13418	0.80893
AGP50771	0.144469	0.794668
AGP50772	0.645992	0.560149
AGP50773	-1.0293	0.223229
AGP50774	-0.302223	0.760394
AGP50775	0.211318	0.813172
AGP50776	-0.673979	0.49227
AGP50777	-0.208945	0.74043
AGP50779	-0.448236	0.252169
AGP50780	0.156111	0.626779
AGP50781	-1.3661	0.087659
AGP50782	-0.733628	0.209623
AGP50783	0.0427443	0.925937
AGP50784	-0.121113	0.693203
AGP50785	-0.242422	0.473158
AGP50786	-0.285256	0.59655
AGP50787	0.0446856	0.945971
AGP50788	-1.42047	0.126488
AGP50789	0.171135	0.792371
AGP50790	-0.210334	0.77735
AGP50791	0.472021	0.488239
AGP50792	0.19968	0.74604
AGP50793	-0.612544	0.375353
AGP50794	0.54253	0.345388
AGP50795	0.155956	0.745891
AGP50796	0.728044	0.198308
AGP50797	-0.207609	0.813172
AGP50798	-0.510939	0.215878
AGP50799	-0.17075	0.553064
AGP50800	-0.932344	0.42678
AGP50801	-0.102463	0.761058
AGP50802	-0.962415	0.0844775
AGP50803	0.618237	0.614913
AGP50804	-0.625513	0.305204
AGP50805	-0.614088	0.312486
AGP50806	-0.022543	0.956179
AGP50807	-1.34286	0.137152
AGP50808	-1.81868	0.0222999
AGP50809	-0.880878	0.154479
AGP50810	-0.459877	0.563873
EPlHVUG00000039848	0	-
EPlHVUG00000039849	-0.857288	0.184243
EPlHVUG00000039850	-0.37586	0.488405
EPlHVUG00000039851	-0.513462	0.440391
EPlHVUG00000039852	-0.219207	0.795922
EPlHVUG00000039853	-0.575823	0.274454
EPlHVUG00000039855	0	-
EPlHVUG00000039856	-0.813989	0.109992
EPlHVUG00000039857	-1.88827	0.0984439
EPlHVUG00000039858	0	-
EPlHVUG00000039861	-0.665699	0.394076
EPlHVUG00000039863	-0.0795776	0.88403
EPlHVUG00000039864	-0.539022	0.320016
EPlHVUG00000039865	0	-
EPlHVUG00000039867	-0.811942	0.197809
EPlHVUG00000039869	0	-
EPlHVUG00000039870	-1.58169	0.0215774
EPlHVUG00000039871	-1.02299	0.046957
EPlHVUG00000039873	-0.211712	0.839292
EPlHVUG00000039875	0.0405441	0.958818
EPlHVUG00000039877	0	-
EPlHVUG00000039878	0	-
EPlHVUG00000039879	-0.682143	0.0693992
EPlHVUG00000039880	-0.330893	0.626779
EPlHVUG00000039881	-0.640661	0.212794
EPlHVUG00000039882	0	-
EPlHVUG00000039883	-2.0006	0.0463761
EPlHVUG00000039888	0.60751	0.499033
EPlHVUG00000039890	-2.11665	0.00813855
EPlHVUG00000039891	-1.02905	0.0702411
EPlHVUG00000039893	-0.330893	0.626779
EPlHVUG00000039894	0	-
HORVU0Hr1G000020	-0.394544	0.105637
HORVU0Hr1G000030	-0.394371	0.105631
HORVU0Hr1G000050	-0.599101	0.151412
HORVU0Hr1G000080	-0.0921776	0.752898
HORVU0Hr1G000100	-0.335835	0.399249
HORVU0Hr1G000120	0	-
HORVU0Hr1G000130	-0.278998	0.78136
HORVU0Hr1G000160	1.23612	0.00151917
HORVU0Hr1G000200	0.258683	0.494877
HORVU0Hr1G000230	0	-
HORVU0Hr1G000250	-1.19667	0.012805
HORVU0Hr1G000270	0.102808	0.793532
HORVU0Hr1G000280	0.172813	0.599594
HORVU0Hr1G000290	0	-
HORVU0Hr1G000300	0	-
HORVU0Hr1G000320	1.13154	0.0127969
HORVU0Hr1G000340	1.08392	0.383923
HORVU0Hr1G000350	1.22423	0.0456863
HORVU0Hr1G000360	1.61909	0.0568696
HORVU0Hr1G000370	0.372123	0.429568
HORVU0Hr1G000390	0.340819	0.35654
HORVU0Hr1G000410	-0.109324	0.519286
HORVU0Hr1G000420	-1.54891	0.0244858
HORVU0Hr1G000430	-0.182209	0.812665
HORVU0Hr1G000450	-0.300047	0.315959
HORVU0Hr1G000490	0.190198	0.543797
HORVU0Hr1G000500	0	-
HORVU0Hr1G000510	-0.0376872	0.924118
HORVU0Hr1G000600	0.0418188	0.795116
HORVU0Hr1G000620	1.65081	0.037941
HORVU0Hr1G000630	-0.698016	0.00468041
HORVU0Hr1G000640	0	-
HORVU0Hr1G000650	3.14319	0.0035672
HORVU0Hr1G000660	0.26138	0.345535
HORVU0Hr1G000670	2.40007	0.00487246
HORVU0Hr1G000710	-0.734749	0.00139825
HORVU0Hr1G000720	0	-
HORVU0Hr1G000730	0	-
HORVU0Hr1G000740	0	-
HORVU0Hr1G000760	-5.65671	0.0033588
HORVU0Hr1G000780	-1.97214	0.200902
HORVU0Hr1G000810	-2.70339	0.240463
HORVU0Hr1G000840	-1.3219	0.0971658
HORVU0Hr1G000850	-4.41866	0.00424599
HORVU0Hr1G000890	-0.241201	0.771304
HORVU0Hr1G000900	-0.464201	0.494197
HORVU0Hr1G000910	-1.27655	0.00866693
HORVU0Hr1G000930	0.288568	0.0305029
HORVU0Hr1G000940	-0.0320498	0.921335
HORVU0Hr1G000950	0.671855	0.139785
HORVU0Hr1G000960	0.321382	0.480659
HORVU0Hr1G000990	-0.58816	0.433208
HORVU0Hr1G001040	-0.463244	0.666981
HORVU0Hr1G001050	-0.698298	0.00513904
HORVU0Hr1G001070	0.843487	0.041785
HORVU0Hr1G001110	-0.314074	0.693884
HORVU0Hr1G001120	0.131055	0.742419
HORVU0Hr1G001140	0	-
HORVU0Hr1G001150	0	-
HORVU0Hr1G001160	0.95106	0.0389967
HORVU0Hr1G001170	0.467042	0.139509
HORVU0Hr1G001180	0.00106857	0.997745
HORVU0Hr1G001190	-0.0208818	0.974962
HORVU0Hr1G001200	0	-
HORVU0Hr1G001230	0.00550207	0.991789
HORVU0Hr1G001240	-0.346679	0.293505
HORVU0Hr1G001270	-0.269695	0.385393
HORVU0Hr1G001280	1.4622	0.00927967
HORVU0Hr1G001300	-0.661697	0.00686576
HORVU0Hr1G001340	-0.565551	0.0160967
HORVU0Hr1G001350	-0.137407	0.626779
HORVU0Hr1G001370	0.251899	0.416949
HORVU0Hr1G001390	-0.214517	0.507207
HORVU0Hr1G001400	0.00396248	0.986341
HORVU0Hr1G001420	0.571988	0.225558
HORVU0Hr1G001430	-1.22202	0.211659
HORVU0Hr1G001440	-0.29221	0.126545
HORVU0Hr1G001450	-0.0368781	0.905568
HORVU0Hr1G001460	-0.677114	0.0116796
HORVU0Hr1G001470	0	-
HORVU0Hr1G001480	4.69359	0.083073
HORVU0Hr1G001490	0.973533	0.022246
HORVU0Hr1G001500	-0.0464872	0.900881
HORVU0Hr1G001510	0.485051	0.0583292
HORVU0Hr1G001520	0	-
HORVU0Hr1G001530	0.0633751	0.870738
HORVU0Hr1G001570	0.0369914	0.863565
HORVU0Hr1G001580	0.930065	0.0478179
HORVU0Hr1G001600	0.658643	0.168395
HORVU0Hr1G001610	0	-
HORVU0Hr1G001630	0.28273	0.269956
HORVU0Hr1G001640	0.49259	0.107727
HORVU0Hr1G001680	0.632812	0.413106
HORVU0Hr1G001690	0.407518	0.483509
HORVU0Hr1G001750	-0.00965751	0.973193
HORVU0Hr1G001760	0.451481	0.100436
HORVU0Hr1G001770	0	-
HORVU0Hr1G001780	0	-
HORVU0Hr1G001800	8.18455	0.0110731
HORVU0Hr1G001810	0	-
HORVU0Hr1G001820	0	-
HORVU0Hr1G001840	0.357354	0.690676
HORVU0Hr1G001870	0	-
HORVU0Hr1G001880	0	-
HORVU0Hr1G001900	0	-
HORVU0Hr1G001920	0	-
HORVU0Hr1G001960	0	-
HORVU0Hr1G001980	0	-
HORVU0Hr1G002020	1.0487	0.106445
HORVU0Hr1G002030	0	-
HORVU0Hr1G002040	0	-
HORVU0Hr1G002060	0	-
HORVU0Hr1G002080	-0.017727	0.991493
HORVU0Hr1G002090	1.43195	0.166819
HORVU0Hr1G002110	0.0446271	0.96761
HORVU0Hr1G002120	1.51698	0.101641
HORVU0Hr1G002220	-0.0575261	0.761227
HORVU0Hr1G002250	-0.440134	0.471068
HORVU0Hr1G002270	0	-
HORVU0Hr1G002290	0	-
HORVU0Hr1G002300	0.367245	0.668411
HORVU0Hr1G002320	0	-
HORVU0Hr1G002340	-0.0475101	0.895337
HORVU0Hr1G002360	0	-
HORVU0Hr1G002390	1.12618	0.328487
HORVU0Hr1G002410	1.26493	0.243789
HORVU0Hr1G002450	0	-
HORVU0Hr1G002460	0	-
HORVU0Hr1G002480	-2.35499	0.0016407
HORVU0Hr1G002500	-1.97715	0.00223008
HORVU0Hr1G002520	-0.309331	0.507864
HORVU0Hr1G002530	-1.71676	0.00839228
HORVU0Hr1G002580	1.66318	0.0216515
HORVU0Hr1G002600	-0.0599207	0.887755
HORVU0Hr1G002620	0	-
HORVU0Hr1G002630	0	-
HORVU0Hr1G002640	0.210242	0.880833
HORVU0Hr1G002680	-0.384582	0.0594231
HORVU0Hr1G002690	0.128329	0.821223
HORVU0Hr1G002710	0.554955	0.626849
HORVU0Hr1G002720	-0.708755	0.00304215
HORVU0Hr1G002730	-0.45924	0.0287372
HORVU0Hr1G002760	0	-
HORVU0Hr1G002770	0	-
HORVU0Hr1G002800	0	-
HORVU0Hr1G002810	0	-
HORVU0Hr1G002840	0	-
HORVU0Hr1G002870	0.430751	0.78177
HORVU0Hr1G002880	0	-
HORVU0Hr1G002920	-0.822752	0.154152
HORVU0Hr1G002930	-0.967038	0.196819
HORVU0Hr1G002940	-0.93972	0.328111
HORVU0Hr1G002950	1.62644	0.00464335
HORVU0Hr1G002960	0.372862	0.205047
HORVU0Hr1G002990	0.905134	0.245754
HORVU0Hr1G003000	-1.41127	0.00108735
HORVU0Hr1G003010	-0.166476	0.668172
HORVU0Hr1G003020	0.141431	0.41075
HORVU0Hr1G003030	0	-
HORVU0Hr1G003040	-0.547959	0.0110701
HORVU0Hr1G003080	1.13835	0.29799
HORVU0Hr1G003110	1.62431	0.10238
HORVU0Hr1G003140	0	-
HORVU0Hr1G003170	0	-
HORVU0Hr1G003180	0	-
HORVU0Hr1G003190	2.79323	0.00149645
HORVU0Hr1G003200	0.692339	0.0595846
HORVU0Hr1G003210	0.0852717	0.860278
HORVU0Hr1G003220	-2.57768	0.00477892
HORVU0Hr1G003230	0.78579	0.0385025
HORVU0Hr1G003260	0.483585	0.19199
HORVU0Hr1G003270	0.906732	0.0301592
HORVU0Hr1G003280	0.35005	0.776676
HORVU0Hr1G003300	0	-
HORVU0Hr1G003320	0.0563664	0.936741
HORVU0Hr1G003330	-0.354511	0.321748
HORVU0Hr1G003340	0.910609	0.0570768
HORVU0Hr1G003380	-0.0922385	0.607918
HORVU0Hr1G003440	0.174683	0.707782
HORVU0Hr1G003480	3.99693	0.0193795
HORVU0Hr1G003490	0.319967	0.143047
HORVU0Hr1G003520	0	-
HORVU0Hr1G003540	0.248862	0.164563
HORVU0Hr1G003660	0.460953	0.41778
HORVU0Hr1G003700	0	-
HORVU0Hr1G003720	-0.223974	0.834944
HORVU0Hr1G003770	0	-
HORVU0Hr1G003790	0	-
HORVU0Hr1G003810	0.509291	0.356319
HORVU0Hr1G003840	0	-
HORVU0Hr1G003850	-0.655062	0.288466
HORVU0Hr1G003870	0.242949	0.427198
HORVU0Hr1G003880	0	-
HORVU0Hr1G003890	1.15393	0.0706549
HORVU0Hr1G003900	0.224506	0.772425
HORVU0Hr1G003910	0.341697	0.424662
HORVU0Hr1G003920	1.17257	0.392974
HORVU0Hr1G003930	4.23521	0.00129273
HORVU0Hr1G003950	-0.706196	0.287481
HORVU0Hr1G003980	-1.76545	0.0278002
HORVU0Hr1G004040	-0.485125	0.338901
HORVU0Hr1G004060	0.720624	0.131894
HORVU0Hr1G004120	0.0269734	0.926343
HORVU0Hr1G004130	-0.399255	0.1035
HORVU0Hr1G004140	0	-
HORVU0Hr1G004150	-0.464887	0.123047
HORVU0Hr1G004160	-0.154213	0.633541
HORVU0Hr1G004200	0.282395	0.226893
HORVU0Hr1G004250	0	-
HORVU0Hr1G004270	-0.274688	0.371002
HORVU0Hr1G004300	0.400024	0.479796
HORVU0Hr1G004320	-0.447802	0.406456
HORVU0Hr1G004330	-0.216859	0.390583
HORVU0Hr1G004350	-0.277951	0.330209
HORVU0Hr1G004380	0	-
HORVU0Hr1G004400	-0.115151	0.682497
HORVU0Hr1G004410	4.63472	0.0267165
HORVU0Hr1G004420	0.0835942	0.704868
HORVU0Hr1G004430	0.0818021	0.682268
HORVU0Hr1G004470	-0.209034	0.627527
HORVU0Hr1G004480	-0.092832	0.804917
HORVU0Hr1G004510	0.36451	0.522231
HORVU0Hr1G004530	0	-
HORVU0Hr1G004610	0	-
HORVU0Hr1G004630	0	-
HORVU0Hr1G004640	0	-
HORVU0Hr1G004650	2.39694	0.172017
HORVU0Hr1G004670	-1.28071	0.195288
HORVU0Hr1G004680	0	-
HORVU0Hr1G004690	0.387236	0.507831
HORVU0Hr1G004700	-0.263564	0.489997
HORVU0Hr1G004730	0.221568	0.794668
HORVU0Hr1G004740	0.146819	0.86929
HORVU0Hr1G004750	0	-
HORVU0Hr1G004790	-0.451574	0.0643005
HORVU0Hr1G004800	-0.265378	0.594396
HORVU0Hr1G004830	1.02561	0.0630386
HORVU0Hr1G004850	1.98037	0.00533257
HORVU0Hr1G004870	-1.06926	0.0119417
HORVU0Hr1G004890	0.302177	0.770596
HORVU0Hr1G004900	0	-
HORVU0Hr1G004910	-0.780602	0.368693
HORVU0Hr1G004960	-0.0616728	0.780522
HORVU0Hr1G004970	-0.0207165	0.908571
HORVU0Hr1G004980	-0.935781	0.0518809
HORVU0Hr1G004990	-0.352352	0.267374
HORVU0Hr1G005000	-0.352061	0.298737
HORVU0Hr1G005010	0	-
HORVU0Hr1G005020	-0.137041	0.704822
HORVU0Hr1G005050	-0.100867	0.912604
HORVU0Hr1G005060	2.72341	0.0692926
HORVU0Hr1G005070	-0.748364	0.0486775
HORVU0Hr1G005090	0	-
HORVU0Hr1G005100	-0.228971	0.754245
HORVU0Hr1G005120	0	-
HORVU0Hr1G005130	0	-
HORVU0Hr1G005140	0.727837	0.0893579
HORVU0Hr1G005150	0.636574	0.477602
HORVU0Hr1G005160	-1.55676	0.0323457
HORVU0Hr1G005180	0	-
HORVU0Hr1G005200	0	-
HORVU0Hr1G005210	1.09699	0.299128
HORVU0Hr1G005230	-1.49973	0.0137233
HORVU0Hr1G005240	0.991743	0.0998252
HORVU0Hr1G005250	0	-
HORVU0Hr1G005260	1.83298	0.00182821
HORVU0Hr1G005290	0.705901	0.0349499
HORVU0Hr1G005300	-5.8977	0.00373077
HORVU0Hr1G005320	0.322182	0.601101
HORVU0Hr1G005330	1.37845	0.00578256
HORVU0Hr1G005350	2.59466	0.0625547
HORVU0Hr1G005360	6.22635	0.00247437
HORVU0Hr1G005380	1.33874	0.0153862
HORVU0Hr1G005400	0.228383	0.783434
HORVU0Hr1G005410	0	-
HORVU0Hr1G005420	-2.72767	0.00658017
HORVU0Hr1G005430	-0.989384	0.146675
HORVU0Hr1G005480	0	-
HORVU0Hr1G005490	0	-
HORVU0Hr1G005500	0.345635	0.460975
HORVU0Hr1G005510	0.904708	0.0286803
HORVU0Hr1G005520	-0.0547985	0.905752
HORVU0Hr1G005540	0.636135	0.49525
HORVU0Hr1G005550	0.357355	0.745891
HORVU0Hr1G005560	0	-
HORVU0Hr1G005570	0.442093	0.0611309
HORVU0Hr1G005590	0	-
HORVU0Hr1G005600	0	-
HORVU0Hr1G005610	0	-
HORVU0Hr1G005620	0	-
HORVU0Hr1G005640	0	-
HORVU0Hr1G005660	0	-
HORVU0Hr1G005670	-0.4286	0.215172
HORVU0Hr1G005680	0	-
HORVU0Hr1G005690	0	-
HORVU0Hr1G005700	0	-
HORVU0Hr1G005720	0.0608997	0.832606
HORVU0Hr1G005730	0	-
HORVU0Hr1G005750	0.860033	0.0271337
HORVU0Hr1G005770	0.329999	0.244028
HORVU0Hr1G005790	-0.0911851	0.702104
HORVU0Hr1G005820	0.149957	0.61929
HORVU0Hr1G005840	0.450475	0.183108
HORVU0Hr1G005850	1.14523	0.0550074
HORVU0Hr1G005860	-0.323519	0.65911
HORVU0Hr1G005870	-0.00317491	0.998257
HORVU0Hr1G005890	0.391568	0.373827
HORVU0Hr1G005900	0.559177	0.19865
HORVU0Hr1G005910	0.377727	0.589159
HORVU0Hr1G005920	0.511512	0.0149361
HORVU0Hr1G005960	-0.0833394	0.744381
HORVU0Hr1G005970	0	-
HORVU0Hr1G006020	0.0123944	0.976872
HORVU0Hr1G006040	-0.0910496	0.826469
HORVU0Hr1G006050	-0.302217	0.588662
HORVU0Hr1G006070	0.161478	0.69423
HORVU0Hr1G006080	-0.130076	0.74556
HORVU0Hr1G006090	0	-
HORVU0Hr1G006100	0	-
HORVU0Hr1G006120	0	-
HORVU0Hr1G006130	0	-
HORVU0Hr1G006140	-4.19755	0.00164241
HORVU0Hr1G006150	-2.4891	0.00658017
HORVU0Hr1G006160	-4.24797	0.00168317
HORVU0Hr1G006170	-0.205414	0.919317
HORVU0Hr1G006190	-0.361581	0.166288
HORVU0Hr1G006210	0	-
HORVU0Hr1G006240	-0.57907	0.0701715
HORVU0Hr1G006250	-0.247174	0.426248
HORVU0Hr1G006260	0	-
HORVU0Hr1G006270	0	-
HORVU0Hr1G006280	0	-
HORVU0Hr1G006290	1.48431	0.228873
HORVU0Hr1G006300	0	-
HORVU0Hr1G006330	0	-
HORVU0Hr1G006340	0	-
HORVU0Hr1G006350	-0.844594	0.0246517
HORVU0Hr1G006360	-0.61523	0.190961
HORVU0Hr1G006370	0	-
HORVU0Hr1G006380	0	-
HORVU0Hr1G006410	1.00005	0.0418759
HORVU0Hr1G006420	0.182891	0.818354
HORVU0Hr1G006430	0.0436102	0.9587
HORVU0Hr1G006440	0.162402	0.594657
HORVU0Hr1G006450	0	-
HORVU0Hr1G006460	-0.585928	0.0569232
HORVU0Hr1G006470	0	-
HORVU0Hr1G006520	0.759738	0.611917
HORVU0Hr1G006550	0	-
HORVU0Hr1G006560	0	-
HORVU0Hr1G006580	0	-
HORVU0Hr1G006600	0.161035	0.890931
HORVU0Hr1G006620	0.110932	0.943949
HORVU0Hr1G006630	-0.125432	0.619191
HORVU0Hr1G006640	-0.213548	0.426248
HORVU0Hr1G006680	0.139087	0.715208
HORVU0Hr1G006720	-0.237311	0.482111
HORVU0Hr1G006740	0.588243	0.0159825
HORVU0Hr1G006750	1.61011	0.00101125
HORVU0Hr1G006770	0	-
HORVU0Hr1G006790	0.00304739	0.99525
HORVU0Hr1G006800	-0.124919	0.749583
HORVU0Hr1G006810	0	-
HORVU0Hr1G006830	-0.847168	0.155524
HORVU0Hr1G006890	2.08339	0.0267751
HORVU0Hr1G006920	0	-
HORVU0Hr1G006930	-0.318985	0.283779
HORVU0Hr1G006940	0.210521	0.836792
HORVU0Hr1G006950	-0.0910665	0.634159
HORVU0Hr1G006960	0.0831238	0.629381
HORVU0Hr1G006980	0.351141	0.739172
HORVU0Hr1G007000	-0.0689566	0.791849
HORVU0Hr1G007020	0.0138726	0.990676
HORVU0Hr1G007030	1.21274	0.0446092
HORVU0Hr1G007050	0.622909	0.372454
HORVU0Hr1G007070	-0.479386	0.0448608
HORVU0Hr1G007090	0	-
HORVU0Hr1G007100	0	-
HORVU0Hr1G007110	-0.85132	0.000924396
HORVU0Hr1G007130	1.32565	0.243469
HORVU0Hr1G007150	-0.110222	0.668635
HORVU0Hr1G007170	0	-
HORVU0Hr1G007190	0	-
HORVU0Hr1G007210	0	-
HORVU0Hr1G007220	0.43248	0.257868
HORVU0Hr1G007240	0	-
HORVU0Hr1G007260	0	-
HORVU0Hr1G007280	0	-
HORVU0Hr1G007320	-0.117584	0.677516
HORVU0Hr1G007330	0	-
HORVU0Hr1G007340	0.121026	0.953053
HORVU0Hr1G007360	1.45077	0.0033588
HORVU0Hr1G007370	0.986581	0.479796
HORVU0Hr1G007380	0.192086	0.60346
HORVU0Hr1G007410	0.318555	0.260256
HORVU0Hr1G007420	0.174427	0.664968
HORVU0Hr1G007430	0	-
HORVU0Hr1G007450	0.528647	0.535902
HORVU0Hr1G007460	0.288516	0.396632
HORVU0Hr1G007470	-1.15833	0.5425
HORVU0Hr1G007480	0.40815	0.691814
HORVU0Hr1G007520	0	-
HORVU0Hr1G007540	0.104459	0.863373
HORVU0Hr1G007580	0	-
HORVU0Hr1G007620	-1.1087	0.172365
HORVU0Hr1G007630	0.23031	0.68976
HORVU0Hr1G007640	0	-
HORVU0Hr1G007650	0.0587993	0.873617
HORVU0Hr1G007680	-2.12433	0.00107505
HORVU0Hr1G007690	-2.12455	0.00107505
HORVU0Hr1G007700	0.552767	0.0244032
HORVU0Hr1G007720	0	-
HORVU0Hr1G007730	0	-
HORVU0Hr1G007740	0.59016	0.592734
HORVU0Hr1G007760	0.114635	0.891967
HORVU0Hr1G007770	1.70781	0.00586237
HORVU0Hr1G007790	0.0916436	0.807433
HORVU0Hr1G007820	0.194616	0.460023
HORVU0Hr1G007830	-0.513967	0.414468
HORVU0Hr1G007860	0.151559	0.687202
HORVU0Hr1G007870	0	-
HORVU0Hr1G007880	-0.942889	0.0162424
HORVU0Hr1G007890	0.145555	0.612554
HORVU0Hr1G007930	-0.0333238	0.92657
HORVU0Hr1G007960	-0.0671946	0.918872
HORVU0Hr1G008030	0.481076	0.34616
HORVU0Hr1G008040	0.531411	0.309667
HORVU0Hr1G008050	0.299634	0.801972
HORVU0Hr1G008060	-0.112273	0.692305
HORVU0Hr1G008070	-0.107555	0.696942
HORVU0Hr1G008080	-0.14777	0.610239
HORVU0Hr1G008280	0.0173693	0.957165
HORVU0Hr1G008350	0	-
HORVU0Hr1G008360	-0.53981	0.0387409
HORVU0Hr1G008370	0	-
HORVU0Hr1G008390	0	-
HORVU0Hr1G008400	0	-
HORVU0Hr1G008470	-0.268054	0.22449
HORVU0Hr1G008550	0.482512	0.0199893
HORVU0Hr1G008580	1.32896	0.0355768
HORVU0Hr1G008590	0.433952	0.0666545
HORVU0Hr1G008610	0	-
HORVU0Hr1G008620	-0.0829455	0.766133
HORVU0Hr1G008640	1.33971	0.0018895
HORVU0Hr1G008650	-0.115255	0.78074
HORVU0Hr1G008670	0.0991676	0.830759
HORVU0Hr1G008690	-0.235291	0.547175
HORVU0Hr1G008700	0.0327864	0.916652
HORVU0Hr1G008740	-1.45815	0.00253325
HORVU0Hr1G008750	-0.0139907	0.982678
HORVU0Hr1G008780	0.750754	0.151654
HORVU0Hr1G008790	0.00969169	0.98126
HORVU0Hr1G008800	-0.0139907	0.982678
HORVU0Hr1G008810	-0.222699	0.461786
HORVU0Hr1G008830	-3.24527	0.0285253
HORVU0Hr1G008840	0.548266	0.184858
HORVU0Hr1G008850	0.418747	0.471201
HORVU0Hr1G008860	-0.264823	0.217195
HORVU0Hr1G008870	-0.28341	0.326752
HORVU0Hr1G008880	-0.453422	0.013248
HORVU0Hr1G008920	0.708035	0.140234
HORVU0Hr1G008940	0.316924	0.289599
HORVU0Hr1G008950	0.778375	0.482112
HORVU0Hr1G008960	-2.59406	0.144174
HORVU0Hr1G008970	-0.848521	0.00107505
HORVU0Hr1G008980	-0.405073	0.181205
HORVU0Hr1G008990	-0.0129867	0.986782
HORVU0Hr1G009030	-0.182756	0.601836
HORVU0Hr1G009040	-0.100527	0.804373
HORVU0Hr1G009050	-1.72258	0.00133573
HORVU0Hr1G009060	0.207877	0.840691
HORVU0Hr1G009070	-1.30936	0.186725
HORVU0Hr1G009080	0.0952458	0.671901
HORVU0Hr1G009100	0	-
HORVU0Hr1G009120	2.19259	0.0138429
HORVU0Hr1G009140	0.0975336	0.791405
HORVU0Hr1G009150	0.0922722	0.802876
HORVU0Hr1G009170	-0.399816	0.142027
HORVU0Hr1G009180	0	-
HORVU0Hr1G009230	0	-
HORVU0Hr1G009250	0	-
HORVU0Hr1G009270	0	-
HORVU0Hr1G009280	0.202458	0.78074
HORVU0Hr1G009310	0	-
HORVU0Hr1G009320	-0.688588	0.440391
HORVU0Hr1G009330	0	-
HORVU0Hr1G009340	-0.688588	0.440391
HORVU0Hr1G009350	-0.688588	0.440391
HORVU0Hr1G009370	0.8527	0.330458
HORVU0Hr1G009380	-0.353408	0.280348
HORVU0Hr1G009390	3.236	0.0558512
HORVU0Hr1G009400	0.661074	0.600317
HORVU0Hr1G009410	-2.51125	0.0729312
HORVU0Hr1G009420	0.760537	0.536972
HORVU0Hr1G009440	2.59591	0.0695148
HORVU0Hr1G009450	3.23327	0.0552123
HORVU0Hr1G009460	-0.0114471	0.989434
HORVU0Hr1G009470	-0.208589	0.883471
HORVU0Hr1G009480	-0.560661	0.493385
HORVU0Hr1G009530	-0.00716367	0.993982
HORVU0Hr1G009540	0	-
HORVU0Hr1G009550	0.686611	0.00428928
HORVU0Hr1G009560	0.224843	0.434153
HORVU0Hr1G009600	0	-
HORVU0Hr1G009680	0.824414	0.230067
HORVU0Hr1G009740	2.00605	0.01133
HORVU0Hr1G009770	0.814051	0.0584429
HORVU0Hr1G009780	0.113312	0.849341
HORVU0Hr1G009800	0	-
HORVU0Hr1G009840	0	-
HORVU0Hr1G009850	0.54829	0.241832
HORVU0Hr1G009860	3.20185	0.00566549
HORVU0Hr1G009870	0.276583	0.202389
HORVU0Hr1G009880	0	-
HORVU0Hr1G009900	-0.323	0.865153
HORVU0Hr1G009910	0.247939	0.183588
HORVU0Hr1G009930	-0.300417	0.684369
HORVU0Hr1G009960	0	-
HORVU0Hr1G009970	0	-
HORVU0Hr1G010000	-0.82055	0.049938
HORVU0Hr1G010010	1.39347	0.173501
HORVU0Hr1G010020	0.0353046	0.921144
HORVU0Hr1G010040	0.643506	0.257596
HORVU0Hr1G010050	0.0750216	0.902154
HORVU0Hr1G010070	0	-
HORVU0Hr1G010080	0.65765	0.661752
HORVU0Hr1G010120	0	-
HORVU0Hr1G010160	1.35832	0.20226
HORVU0Hr1G010170	0.0597504	0.846013
HORVU0Hr1G010180	0	-
HORVU0Hr1G010190	-0.597454	0.531898
HORVU0Hr1G010200	-3.11278	0.00193536
HORVU0Hr1G010210	0	-
HORVU0Hr1G010220	-0.221341	0.594069
HORVU0Hr1G010230	0.190588	0.543583
HORVU0Hr1G010240	0	-
HORVU0Hr1G010250	0.680783	0.0926726
HORVU0Hr1G010260	0.191685	0.345228
HORVU0Hr1G010280	0.016856	0.988122
HORVU0Hr1G010310	0	-
HORVU0Hr1G010330	0	-
HORVU0Hr1G010340	0.192774	0.77462
HORVU0Hr1G010350	0.313477	0.581065
HORVU0Hr1G010360	0	-
HORVU0Hr1G010370	0	-
HORVU0Hr1G010390	0	-
HORVU0Hr1G010400	0	-
HORVU0Hr1G010410	0	-
HORVU0Hr1G010440	0	-
HORVU0Hr1G010460	0.589075	0.641698
HORVU0Hr1G010470	0	-
HORVU0Hr1G010480	0	-
HORVU0Hr1G010490	0.368	0.365457
HORVU0Hr1G010510	-0.0465597	0.904815
HORVU0Hr1G010530	0.138481	0.688099
HORVU0Hr1G010590	0.468305	0.221908
HORVU0Hr1G010600	0	-
HORVU0Hr1G010630	0.0892726	0.727394
HORVU0Hr1G010640	-0.817146	0.24975
HORVU0Hr1G010660	-1.00743	0.0369073
HORVU0Hr1G010680	-0.89649	0.131864
HORVU0Hr1G010690	0	-
HORVU0Hr1G010700	0	-
HORVU0Hr1G010710	0	-
HORVU0Hr1G010750	-0.207558	0.326337
HORVU0Hr1G010760	0.443548	0.696027
HORVU0Hr1G010770	0.331879	0.393262
HORVU0Hr1G010790	-0.601858	0.00781316
HORVU0Hr1G010800	-1.67998	0.000544063
HORVU0Hr1G010810	-0.507037	0.322574
HORVU0Hr1G010840	-0.0321222	0.952317
HORVU0Hr1G010870	-0.177379	0.345636
HORVU0Hr1G010880	-2.59379	0.134742
HORVU0Hr1G010890	-0.161629	0.643796
HORVU0Hr1G010900	-0.659129	0.0696608
HORVU0Hr1G010910	-0.493301	0.406671
HORVU0Hr1G010920	-0.434879	0.24612
HORVU0Hr1G010940	1.70739	0.00588073
HORVU0Hr1G010970	0.143199	0.922397
HORVU0Hr1G010990	0	-
HORVU0Hr1G011010	0	-
HORVU0Hr1G011030	0.99627	0.0205713
HORVU0Hr1G011040	-0.314401	0.819416
HORVU0Hr1G011050	-0.0998396	0.938467
HORVU0Hr1G011110	0.386085	0.613834
HORVU0Hr1G011140	0.441811	0.497894
HORVU0Hr1G011150	0.459998	0.539856
HORVU0Hr1G011280	0	-
HORVU0Hr1G011310	0.173495	0.335743
HORVU0Hr1G011320	0	-
HORVU0Hr1G011330	0.638352	0.039759
HORVU0Hr1G011420	0.669778	0.196901
HORVU0Hr1G011430	0.654822	0.192394
HORVU0Hr1G011440	0	-
HORVU0Hr1G011450	7.19451	0.0205556
HORVU0Hr1G011460	0.00969988	0.979792
HORVU0Hr1G011480	1.09611	0.490333
HORVU0Hr1G011500	0	-
HORVU0Hr1G011510	0.202353	0.754551
HORVU0Hr1G011520	-2.19224	0.0453844
HORVU0Hr1G011560	0.0796433	0.656089
HORVU0Hr1G011570	0.0437747	0.91325
HORVU0Hr1G011580	0	-
HORVU0Hr1G011600	0.578228	0.221839
HORVU0Hr1G011610	0	-
HORVU0Hr1G011620	0	-
HORVU0Hr1G011630	0	-
HORVU0Hr1G011650	0.0170286	0.982418
HORVU0Hr1G011660	-0.696277	0.553336
HORVU0Hr1G011670	0	-
HORVU0Hr1G011700	0	-
HORVU0Hr1G011720	-4.74456	0.00306683
HORVU0Hr1G011730	0	-
HORVU0Hr1G011750	0.0494837	0.91077
HORVU0Hr1G011760	0.577766	0.19265
HORVU0Hr1G011770	0	-
HORVU0Hr1G011840	0.229981	0.366624
HORVU0Hr1G011860	0.0961745	0.767603
HORVU0Hr1G011890	0	-
HORVU0Hr1G011940	-0.428743	0.121143
HORVU0Hr1G012050	-0.0479575	0.917793
HORVU0Hr1G012080	0	-
HORVU0Hr1G012090	0.168201	0.698042
HORVU0Hr1G012100	0	-
HORVU0Hr1G012130	-3.72005	0.0011689
HORVU0Hr1G012140	-0.270013	0.621366
HORVU0Hr1G012160	0	-
HORVU0Hr1G012190	0.703735	0.0730887
HORVU0Hr1G012220	0	-
HORVU0Hr1G012230	0.795683	0.163526
HORVU0Hr1G012260	0.359371	0.116251
HORVU0Hr1G012300	0.0724826	0.927674
HORVU0Hr1G012350	0	-
HORVU0Hr1G012370	-0.372514	0.202997
HORVU0Hr1G012390	2.32793	0.221228
HORVU0Hr1G012410	-0.375062	0.0923339
HORVU0Hr1G012460	-1.14941	0.00590244
HORVU0Hr1G012490	-1.06559	0.0277474
HORVU0Hr1G012510	-0.605378	0.0230807
HORVU0Hr1G012520	0.116874	0.679
HORVU0Hr1G012530	0	-
HORVU0Hr1G012560	0	-
HORVU0Hr1G012570	0	-
HORVU0Hr1G012620	0.306786	0.0914184
HORVU0Hr1G012630	0.20298	0.540075
HORVU0Hr1G012670	0	-
HORVU0Hr1G012680	0	-
HORVU0Hr1G012710	1.61489	0.00713064
HORVU0Hr1G012740	-0.632042	0.497551
HORVU0Hr1G012750	-0.716631	0.4524
HORVU0Hr1G012780	0	-
HORVU0Hr1G012790	0	-
HORVU0Hr1G012820	-0.0878644	0.926261
HORVU0Hr1G012850	0	-
HORVU0Hr1G012860	0.818189	0.0200183
HORVU0Hr1G012870	-0.0465601	0.956417
HORVU0Hr1G012890	-0.319934	0.222825
HORVU0Hr1G012910	2.49846	0.0266745
HORVU0Hr1G012920	1.46755	0.0324
HORVU0Hr1G012930	-2.27512	0.0172364
HORVU0Hr1G012940	-1.73619	0.0465403
HORVU0Hr1G012950	-0.394515	0.250178
HORVU0Hr1G012970	-0.196454	0.762622
HORVU0Hr1G012990	-0.478689	0.770315
HORVU0Hr1G013010	1.07342	0.151008
HORVU0Hr1G013020	0.892911	0.205929
HORVU0Hr1G013030	0	-
HORVU0Hr1G013040	-0.372203	0.171951
HORVU0Hr1G013060	2.03297	0.0107647
HORVU0Hr1G013070	1.99896	0.01652
HORVU0Hr1G013080	0	-
HORVU0Hr1G013090	-0.328562	0.393958
HORVU0Hr1G013110	0	-
HORVU0Hr1G013120	1.1206	0.075296
HORVU0Hr1G013140	0.197042	0.74103
HORVU0Hr1G013160	-0.516657	0.161625
HORVU0Hr1G013170	0.058285	0.933712
HORVU0Hr1G013180	-0.984402	0.0269022
HORVU0Hr1G013190	1.1872	0.0285579
HORVU0Hr1G013200	-0.488196	0.150558
HORVU0Hr1G013220	-0.291709	0.24172
HORVU0Hr1G013240	0.442272	0.23856
HORVU0Hr1G013250	0	-
HORVU0Hr1G013260	1.55565	0.0447609
HORVU0Hr1G013280	0	-
HORVU0Hr1G013290	-0.317185	0.264195
HORVU0Hr1G013310	0	-
HORVU0Hr1G013340	0.230459	0.471351
HORVU0Hr1G013350	0.756861	0.213674
HORVU0Hr1G013380	0.0652698	0.906551
HORVU0Hr1G013390	0.403028	0.164764
HORVU0Hr1G013430	-0.732452	0.334525
HORVU0Hr1G013450	0	-
HORVU0Hr1G013460	-0.189799	0.739804
HORVU0Hr1G013470	0	-
HORVU0Hr1G013490	0	-
HORVU0Hr1G013510	0.124654	0.653834
HORVU0Hr1G013610	0	-
HORVU0Hr1G013660	0.263672	0.620129
HORVU0Hr1G013680	0.327858	0.511335
HORVU0Hr1G013700	-0.0407088	0.939448
HORVU0Hr1G013720	-1.75527	0.0937381
HORVU0Hr1G013740	-1.15382	0.122229
HORVU0Hr1G013750	-0.0473934	0.920972
HORVU0Hr1G013760	1.06013	0.180178
HORVU0Hr1G013770	-0.122187	0.742419
HORVU0Hr1G013780	-0.327638	0.604787
HORVU0Hr1G013800	-0.700784	0.184258
HORVU0Hr1G013830	1.81868	0.000287688
HORVU0Hr1G013850	-0.662317	0.00464335
HORVU0Hr1G013870	0.0318163	0.94388
HORVU0Hr1G013890	0.415774	0.199613
HORVU0Hr1G013900	0.184759	0.609274
HORVU0Hr1G013910	-0.289043	0.649363
HORVU0Hr1G013920	0	-
HORVU0Hr1G013930	0	-
HORVU0Hr1G013940	0	-
HORVU0Hr1G013950	0	-
HORVU0Hr1G013960	0	-
HORVU0Hr1G014000	0	-
HORVU0Hr1G014020	0	-
HORVU0Hr1G014030	0.536936	0.248483
HORVU0Hr1G014040	3.20185	0.00566549
HORVU0Hr1G014050	0.241133	0.266369
HORVU0Hr1G014060	0.118219	0.842069
HORVU0Hr1G014070	-0.411335	0.0418923
HORVU0Hr1G014080	0	-
HORVU0Hr1G014100	1.2375	0.225672
HORVU0Hr1G014110	1.0127	0.0293527
HORVU0Hr1G014120	0	-
HORVU0Hr1G014140	0	-
HORVU0Hr1G014150	-0.11451	0.696964
HORVU0Hr1G014170	0.752662	0.0600004
HORVU0Hr1G014190	0	-
HORVU0Hr1G014200	-0.0513154	0.936963
HORVU0Hr1G014210	-0.590885	0.00513904
HORVU0Hr1G014220	-0.496163	0.00972862
HORVU0Hr1G014230	0	-
HORVU0Hr1G014240	-0.594973	0.00574912
HORVU0Hr1G014250	1.15361	0.163196
HORVU0Hr1G014260	0	-
HORVU0Hr1G014270	0.223559	0.498426
HORVU0Hr1G014280	0	-
HORVU0Hr1G014290	0	-
HORVU0Hr1G014300	0	-
HORVU0Hr1G014360	-4.37119	0.00259733
HORVU0Hr1G014370	0	-
HORVU0Hr1G014390	0	-
HORVU0Hr1G014400	0.64137	0.292032
HORVU0Hr1G014450	-0.0156013	0.992415
HORVU0Hr1G014460	-0.169166	0.700998
HORVU0Hr1G014490	0	-
HORVU0Hr1G014500	0	-
HORVU0Hr1G014510	0.70317	0.21768
HORVU0Hr1G014520	0	-
HORVU0Hr1G014540	0	-
HORVU0Hr1G014570	0	-
HORVU0Hr1G014580	0	-
HORVU0Hr1G014620	0	-
HORVU0Hr1G014630	1.14225	0.0135392
HORVU0Hr1G014650	-3.08803	0.00793234
HORVU0Hr1G014660	0	-
HORVU0Hr1G014720	2.51603	0.233242
HORVU0Hr1G014750	4.89954	0.0779136
HORVU0Hr1G014760	0	-
HORVU0Hr1G014770	0	-
HORVU0Hr1G014780	-0.977115	0.0228313
HORVU0Hr1G014790	0.184502	0.577345
HORVU0Hr1G014810	0.963007	0.145169
HORVU0Hr1G014840	-0.157604	0.799938
HORVU0Hr1G014880	0.137644	0.857176
HORVU0Hr1G014900	0.921754	0.0843609
HORVU0Hr1G014940	-0.0575005	0.875727
HORVU0Hr1G014950	0.338631	0.601836
HORVU0Hr1G014960	0.358265	0.180894
HORVU0Hr1G014980	0	-
HORVU0Hr1G015030	0.738687	0.0504865
HORVU0Hr1G015050	-0.109665	0.640416
HORVU0Hr1G015090	-0.503127	0.348363
HORVU0Hr1G015130	0	-
HORVU0Hr1G015160	-0.0921258	0.845542
HORVU0Hr1G015180	-1.07737	0.0309138
HORVU0Hr1G015190	0	-
HORVU0Hr1G015210	0	-
HORVU0Hr1G015220	0.093755	0.849123
HORVU0Hr1G015230	-0.963805	0.00806034
HORVU0Hr1G015260	0.139602	0.744592
HORVU0Hr1G015270	0	-
HORVU0Hr1G015280	0	-
HORVU0Hr1G015290	0	-
HORVU0Hr1G015300	0	-
HORVU0Hr1G015360	0	-
HORVU0Hr1G015370	2.67029	0.204921
HORVU0Hr1G015380	-0.162302	0.515628
HORVU0Hr1G015390	1.09841	0.0716819
HORVU0Hr1G015410	0.777865	0.396879
HORVU0Hr1G015420	-0.873835	0.121222
HORVU0Hr1G015440	-0.403891	0.451922
HORVU0Hr1G015450	-0.42488	0.0221385
HORVU0Hr1G015470	0	-
HORVU0Hr1G015500	0	-
HORVU0Hr1G015510	0.734949	0.151048
HORVU0Hr1G015520	0.683641	0.0400555
HORVU0Hr1G015530	0.381275	0.405829
HORVU0Hr1G015560	-0.511101	0.116641
HORVU0Hr1G015570	-0.540696	0.475131
HORVU0Hr1G015590	0	-
HORVU0Hr1G015600	0	-
HORVU0Hr1G015630	-0.128721	0.758434
HORVU0Hr1G015650	1.48029	0.0537359
HORVU0Hr1G015660	0	-
HORVU0Hr1G015680	-0.2837	0.821916
HORVU0Hr1G015700	-0.387063	0.0886005
HORVU0Hr1G015710	-0.383037	0.0763712
HORVU0Hr1G015750	-0.224192	0.299157
HORVU0Hr1G015760	0	-
HORVU0Hr1G015770	0.212251	0.216916
HORVU0Hr1G015780	2.90135	0.00530277
HORVU0Hr1G015810	0.942191	0.00880839
HORVU0Hr1G015820	-0.288583	0.485359
HORVU0Hr1G015830	0.0115816	0.969545
HORVU0Hr1G015840	0.344207	0.513739
HORVU0Hr1G015850	0	-
HORVU0Hr1G015860	0.387037	0.638927
HORVU0Hr1G015890	-0.665711	0.0821852
HORVU0Hr1G015910	0	-
HORVU0Hr1G015930	-0.179191	0.813249
HORVU0Hr1G015950	-0.0419692	0.930977
HORVU0Hr1G015960	0.275246	0.306571
HORVU0Hr1G015970	-1.23169	0.0228662
HORVU0Hr1G015980	0	-
HORVU0Hr1G015990	-0.497157	0.332876
HORVU0Hr1G016000	0.389717	0.238738
HORVU0Hr1G016020	0	-
HORVU0Hr1G016040	-1.47713	0.482408
HORVU0Hr1G016050	-0.505413	0.0230886
HORVU0Hr1G016060	0	-
HORVU0Hr1G016130	0	-
HORVU0Hr1G016140	0	-
HORVU0Hr1G016150	-0.276052	0.127219
HORVU0Hr1G016170	1.98917	0.00933635
HORVU0Hr1G016180	-0.146681	0.650449
HORVU0Hr1G016190	0.255174	0.238399
HORVU0Hr1G016220	0	-
HORVU0Hr1G016230	0	-
HORVU0Hr1G016250	0.270348	0.425568
HORVU0Hr1G016310	-1.94577	0.0989643
HORVU0Hr1G016330	0.38592	0.664407
HORVU0Hr1G016340	-0.710442	0.0123838
HORVU0Hr1G016350	0.278607	0.823012
HORVU0Hr1G016360	-0.0371054	0.895337
HORVU0Hr1G016370	2.36319	0.0625912
HORVU0Hr1G016380	0	-
HORVU0Hr1G016410	4.82321	0.0771494
HORVU0Hr1G016420	0	-
HORVU0Hr1G016430	1.36357	0.0113645
HORVU0Hr1G016450	-0.702708	0.0106904
HORVU0Hr1G016470	0	-
HORVU0Hr1G016480	-0.921189	0.379677
HORVU0Hr1G016510	0.43528	0.367027
HORVU0Hr1G016530	0	-
HORVU0Hr1G016540	2.26833	0.257124
HORVU0Hr1G016560	0.53711	0.0273213
HORVU0Hr1G016570	0	-
HORVU0Hr1G016590	2.45065	0.00113922
HORVU0Hr1G016610	2.47162	0.00147268
HORVU0Hr1G016630	0.17389	0.610783
HORVU0Hr1G016640	-0.0989324	0.840902
HORVU0Hr1G016650	0.248099	0.472448
HORVU0Hr1G016660	0.611659	0.028955
HORVU0Hr1G016680	2.54585	0.0866278
HORVU0Hr1G016690	0	-
HORVU0Hr1G016700	-0.073025	0.851027
HORVU0Hr1G016720	-0.414273	0.125751
HORVU0Hr1G016780	2.63227	0.00660161
HORVU0Hr1G016820	0.274221	0.345006
HORVU0Hr1G016830	0	-
HORVU0Hr1G016840	0.789116	0.0182562
HORVU0Hr1G016860	0.645407	0.124343
HORVU0Hr1G016880	0.524623	0.0375753
HORVU0Hr1G016890	-0.00389087	0.996177
HORVU0Hr1G016920	-0.236148	0.139727
HORVU0Hr1G016930	0.203214	0.322887
HORVU0Hr1G016940	0.329317	0.388188
HORVU0Hr1G016950	0	-
HORVU0Hr1G016960	-0.0893959	0.612554
HORVU0Hr1G016970	0	-
HORVU0Hr1G016980	0	-
HORVU0Hr1G017000	-0.515839	0.61725
HORVU0Hr1G017010	0	-
HORVU0Hr1G017020	0.121271	0.483632
HORVU0Hr1G017050	-0.598306	0.0592743
HORVU0Hr1G017060	0	-
HORVU0Hr1G017070	0.042491	0.939552
HORVU0Hr1G017080	-0.39817	0.30006
HORVU0Hr1G017090	0.0366274	0.922983
HORVU0Hr1G017100	0.573166	0.0218368
HORVU0Hr1G017110	5.05285	0.00511438
HORVU0Hr1G017120	-0.443073	0.0216264
HORVU0Hr1G017130	1.09946	0.0426664
HORVU0Hr1G017140	-0.255672	0.391433
HORVU0Hr1G017160	2.18663	0.0017864
HORVU0Hr1G017170	-0.15755	0.677671
HORVU0Hr1G017180	0.346857	0.602779
HORVU0Hr1G017200	-0.00935148	0.991174
HORVU0Hr1G017210	0.00154613	0.996882
HORVU0Hr1G017220	3.06594	0.193004
HORVU0Hr1G017230	-1.73687	0.0402666
HORVU0Hr1G017240	0	-
HORVU0Hr1G017250	0.43634	0.212735
HORVU0Hr1G017260	-0.496604	0.0727835
HORVU0Hr1G017270	-0.234731	0.640684
HORVU0Hr1G017280	0	-
HORVU0Hr1G017290	0	-
HORVU0Hr1G017320	0.367815	0.353417
HORVU0Hr1G017330	-0.40179	0.548953
HORVU0Hr1G017350	0	-
HORVU0Hr1G017360	-0.256313	0.322202
HORVU0Hr1G017370	-0.36182	0.135914
HORVU0Hr1G017380	-0.0129916	0.984538
HORVU0Hr1G017400	1.01598	0.0580295
HORVU0Hr1G017440	-0.17803	0.39332
HORVU0Hr1G017450	-0.136768	0.385751
HORVU0Hr1G017480	0.803037	0.0719207
HORVU0Hr1G017490	1.97383	0.139162
HORVU0Hr1G017510	-0.407456	0.139676
HORVU0Hr1G017530	1.86514	0.0222122
HORVU0Hr1G017540	-0.440238	0.139794
HORVU0Hr1G017560	-0.00201498	0.998585
HORVU0Hr1G017570	-0.00624419	0.994174
HORVU0Hr1G017610	0	-
HORVU0Hr1G017620	0.0398381	0.858313
HORVU0Hr1G017670	-0.29262	0.732756
HORVU0Hr1G017680	-0.212759	0.401484
HORVU0Hr1G017690	-1.27477	0.0333782
HORVU0Hr1G017710	0	-
HORVU0Hr1G017720	0	-
HORVU0Hr1G017740	0.239821	0.520175
HORVU0Hr1G017750	0.285617	0.478301
HORVU0Hr1G017760	0	-
HORVU0Hr1G017790	1.1297	0.0142005
HORVU0Hr1G017800	-0.174014	0.547663
HORVU0Hr1G017830	0	-
HORVU0Hr1G017840	0	-
HORVU0Hr1G017850	0	-
HORVU0Hr1G017940	0.0969412	0.862094
HORVU0Hr1G017950	0	-
HORVU0Hr1G017960	1.30028	0.00977076
HORVU0Hr1G017970	-0.0964584	0.787819
HORVU0Hr1G018000	0.340132	0.241293
HORVU0Hr1G018020	0	-
HORVU0Hr1G018030	0	-
HORVU0Hr1G018040	0	-
HORVU0Hr1G018050	-0.393432	0.473492
HORVU0Hr1G018060	0.00795722	0.985921
HORVU0Hr1G018090	0	-
HORVU0Hr1G018100	-0.172733	0.692274
HORVU0Hr1G018120	0.695479	0.0216264
HORVU0Hr1G018140	0.163223	0.462461
HORVU0Hr1G018160	0.130487	0.765035
HORVU0Hr1G018170	2.30107	0.00196718
HORVU0Hr1G018180	-1.45053	0.258464
HORVU0Hr1G018190	3.02081	0.0347821
HORVU0Hr1G018200	0.0561078	0.773732
HORVU0Hr1G018210	0.117914	0.723651
HORVU0Hr1G018240	2.78003	0.0240125
HORVU0Hr1G018250	0	-
HORVU0Hr1G018260	0	-
HORVU0Hr1G018270	1.45726	0.102623
HORVU0Hr1G018280	0	-
HORVU0Hr1G018290	2.81902	0.0332837
HORVU0Hr1G018300	-0.156082	0.512066
HORVU0Hr1G018320	1.67809	0.0318614
HORVU0Hr1G018350	0.243597	0.710437
HORVU0Hr1G018360	1.41906	0.0117962
HORVU0Hr1G018370	0.125956	0.787604
HORVU0Hr1G018380	0.125956	0.787604
HORVU0Hr1G018390	-1.65848	0.00744232
HORVU0Hr1G018410	0	-
HORVU0Hr1G018430	0	-
HORVU0Hr1G018450	0	-
HORVU0Hr1G018470	-0.0533651	0.89959
HORVU0Hr1G018480	0.329357	0.508749
HORVU0Hr1G018510	-0.436616	0.0292878
HORVU0Hr1G018520	0	-
HORVU0Hr1G018530	0	-
HORVU0Hr1G018560	0	-
HORVU0Hr1G018570	0	-
HORVU0Hr1G018590	5.35997	0.0284033
HORVU0Hr1G018670	0	-
HORVU0Hr1G018690	0.543512	0.0950777
HORVU0Hr1G018710	0.658321	0.330504
HORVU0Hr1G018730	0	-
HORVU0Hr1G018770	-0.58414	0.305274
HORVU0Hr1G018780	0	-
HORVU0Hr1G018800	0	-
HORVU0Hr1G018810	0	-
HORVU0Hr1G018820	0	-
HORVU0Hr1G018830	-1.21992	0.00239721
HORVU0Hr1G018840	-1.28141	0.307573
HORVU0Hr1G018850	4.4314	0.03519
HORVU0Hr1G018890	2.35166	0.00725957
HORVU0Hr1G018910	0	-
HORVU0Hr1G018940	0	-
HORVU0Hr1G018970	1.18681	0.00269005
HORVU0Hr1G018980	0.242123	0.30942
HORVU0Hr1G019020	1.98258	0.158205
HORVU0Hr1G019050	1.23319	0.21052
HORVU0Hr1G019110	0	-
HORVU0Hr1G019120	0	-
HORVU0Hr1G019280	0	-
HORVU0Hr1G019300	-4.25368	0.0053588
HORVU0Hr1G019330	0	-
HORVU0Hr1G019350	-0.433905	0.360078
HORVU0Hr1G019360	0	-
HORVU0Hr1G019370	0.424753	0.0936421
HORVU0Hr1G019390	0.32014	0.24299
HORVU0Hr1G019400	0	-
HORVU0Hr1G019410	0	-
HORVU0Hr1G019420	0.571624	0.496862
HORVU0Hr1G019430	0	-
HORVU0Hr1G019450	1.0384	0.0574186
HORVU0Hr1G019500	0.895004	0.0979662
HORVU0Hr1G019530	0	-
HORVU0Hr1G019560	0	-
HORVU0Hr1G019570	0	-
HORVU0Hr1G019590	-1.78158	0.272129
HORVU0Hr1G019600	-0.726897	0.0258032
HORVU0Hr1G019610	-0.339154	0.138607
HORVU0Hr1G019620	0.0664163	0.846539
HORVU0Hr1G019630	0	-
HORVU0Hr1G019640	0	-
HORVU0Hr1G019650	0	-
HORVU0Hr1G019660	0	-
HORVU0Hr1G019670	0	-
HORVU0Hr1G019680	-1.23	0.0838237
HORVU0Hr1G019690	-1.54138	0.0907541
HORVU0Hr1G019700	-1.23318	0.0430049
HORVU0Hr1G019710	0.312254	0.0919428
HORVU0Hr1G019750	0.282107	0.577614
HORVU0Hr1G019760	1.3937	0.0232463
HORVU0Hr1G019770	-0.919482	0.0181287
HORVU0Hr1G019780	-1.05347	0.0297382
HORVU0Hr1G019800	-0.117845	0.721477
HORVU0Hr1G019830	0	-
HORVU0Hr1G019840	1.83953	0.180621
HORVU0Hr1G019850	-1.00235	0.0256584
HORVU0Hr1G019870	0.56138	0.378425
HORVU0Hr1G019920	-2.29118	0.0532332
HORVU0Hr1G019930	-0.215195	0.74043
HORVU0Hr1G019940	0	-
HORVU0Hr1G019950	-0.326594	0.559576
HORVU0Hr1G020040	0	-
HORVU0Hr1G020070	-0.131787	0.674938
HORVU0Hr1G020090	0	-
HORVU0Hr1G020110	-0.0478277	0.86881
HORVU0Hr1G020130	0.676821	0.345388
HORVU0Hr1G020140	0.21493	0.372616
HORVU0Hr1G020160	0.0879727	0.812549
HORVU0Hr1G020180	-0.178598	0.482145
HORVU0Hr1G020200	0.16935	0.656289
HORVU0Hr1G020210	0.274449	0.483316
HORVU0Hr1G020220	0.73781	0.0335103
HORVU0Hr1G020230	2.04611	0.0629964
HORVU0Hr1G020240	-0.408622	0.333622
HORVU0Hr1G020250	0	-
HORVU0Hr1G020260	0.413031	0.0428786
HORVU0Hr1G020270	0.705651	0.548471
HORVU0Hr1G020280	0	-
HORVU0Hr1G020290	0	-
HORVU0Hr1G020300	-0.0415203	0.960662
HORVU0Hr1G020310	0	-
HORVU0Hr1G020320	0.774014	0.321785
HORVU0Hr1G020330	3.45519	0.324903
HORVU0Hr1G020340	0	-
HORVU0Hr1G020350	1.33785	0.237446
HORVU0Hr1G020360	-0.664416	0.326335
HORVU0Hr1G020370	0	-
HORVU0Hr1G020380	0	-
HORVU0Hr1G020400	0	-
HORVU0Hr1G020420	-1.84219	0.00418984
HORVU0Hr1G020450	0.359618	0.252521
HORVU0Hr1G020460	0	-
HORVU0Hr1G020490	0.205933	0.518875
HORVU0Hr1G020500	-0.0334344	0.938108
HORVU0Hr1G020520	0	-
HORVU0Hr1G020540	0	-
HORVU0Hr1G020550	0	-
HORVU0Hr1G020560	0	-
HORVU0Hr1G020590	0.0124944	0.988542
HORVU0Hr1G020630	0.394671	0.595989
HORVU0Hr1G020690	0	-
HORVU0Hr1G020700	0	-
HORVU0Hr1G020710	0	-
HORVU0Hr1G020720	0	-
HORVU0Hr1G020730	-0.10959	0.79226
HORVU0Hr1G020740	0	-
HORVU0Hr1G020750	3.20093	0.00402186
HORVU0Hr1G020770	-0.526356	0.497194
HORVU0Hr1G020780	-0.80983	0.353652
HORVU0Hr1G020790	-0.329683	0.0704923
HORVU0Hr1G020800	0.0682372	0.846013
HORVU0Hr1G020810	0.702606	0.308996
HORVU0Hr1G020840	-0.506826	0.140242
HORVU0Hr1G020850	-0.0815377	0.862175
HORVU0Hr1G020860	-0.101833	0.826995
HORVU0Hr1G020900	0	-
HORVU0Hr1G020910	0	-
HORVU0Hr1G020930	0	-
HORVU0Hr1G020940	1.20856	0.132174
HORVU0Hr1G020950	0	-
HORVU0Hr1G020960	0.409486	0.494761
HORVU0Hr1G020980	0.600074	0.0430095
HORVU0Hr1G021000	0.324196	0.289069
HORVU0Hr1G021040	0	-
HORVU0Hr1G021050	0.418595	0.478729
HORVU0Hr1G021060	0.156173	0.45993
HORVU0Hr1G021100	-0.0958523	0.741023
HORVU0Hr1G021120	0	-
HORVU0Hr1G021140	0.74062	0.0336632
HORVU0Hr1G021200	-0.19669	0.560518
HORVU0Hr1G021220	0	-
HORVU0Hr1G021230	-0.291215	0.0765165
HORVU0Hr1G021240	0	-
HORVU0Hr1G021280	2.79551	0.0181091
HORVU0Hr1G021290	0	-
HORVU0Hr1G021390	0.0525405	0.908421
HORVU0Hr1G021400	0.12331	0.773822
HORVU0Hr1G021410	0	-
HORVU0Hr1G021440	0	-
HORVU0Hr1G021450	-0.174911	0.788749
HORVU0Hr1G021460	0.128476	0.872474
HORVU0Hr1G021480	-3.37156	0.00440325
HORVU0Hr1G021500	-1.43655	0.162084
HORVU0Hr1G021520	0	-
HORVU0Hr1G021540	3.92602	0.157924
HORVU0Hr1G021590	0.39722	0.624222
HORVU0Hr1G021610	-3.38322	0.00270624
HORVU0Hr1G021630	0.955334	0.0566441
HORVU0Hr1G021640	-0.684626	0.0936486
HORVU0Hr1G021670	-1.58722	0.114719
HORVU0Hr1G021680	0	-
HORVU0Hr1G021690	0.762464	0.331875
HORVU0Hr1G021720	0.488648	0.436177
HORVU0Hr1G021730	0.150723	0.641178
HORVU0Hr1G021740	0.309142	0.193612
HORVU0Hr1G021760	0.339326	0.407398
HORVU0Hr1G021780	0.0138673	0.982418
HORVU0Hr1G021800	1.98853	0.00741351
HORVU0Hr1G021810	-0.457549	0.245278
HORVU0Hr1G021820	0	-
HORVU0Hr1G021830	0	-
HORVU0Hr1G021850	-0.00418352	0.99195
HORVU0Hr1G021860	-1.43618	0.000643244
HORVU0Hr1G021880	-0.0470833	0.822099
HORVU0Hr1G021890	0	-
HORVU0Hr1G021920	0	-
HORVU0Hr1G021930	0.561789	0.15847
HORVU0Hr1G021940	0.231708	0.286412
HORVU0Hr1G021950	0.262411	0.403289
HORVU0Hr1G021960	0.262537	0.362331
HORVU0Hr1G021970	0.258118	0.36282
HORVU0Hr1G021980	0.0869789	0.74953
HORVU0Hr1G022000	0.670795	0.0960149
HORVU0Hr1G022020	0.906444	0.379677
HORVU0Hr1G022030	1.49377	0.0347891
HORVU0Hr1G022050	-0.0429471	0.852209
HORVU0Hr1G022060	0.181345	0.771643
HORVU0Hr1G022070	-3.02236	0.0173695
HORVU0Hr1G022090	2.79721	0.0358717
HORVU0Hr1G022100	2.51821	0.118381
HORVU0Hr1G022110	6.47177	0.000711536
HORVU0Hr1G022130	0	-
HORVU0Hr1G022140	0	-
HORVU0Hr1G022150	0	-
HORVU0Hr1G022160	0.243996	0.310727
HORVU0Hr1G022170	0	-
HORVU0Hr1G022190	0	-
HORVU0Hr1G022200	0	-
HORVU0Hr1G022220	0	-
HORVU0Hr1G022230	0	-
HORVU0Hr1G022240	0.479908	0.0209759
HORVU0Hr1G022260	-1.28472	0.110527
HORVU0Hr1G022270	-0.194774	0.40787
HORVU0Hr1G022280	0.209131	0.544907
HORVU0Hr1G022290	-1.29912	0.0187471
HORVU0Hr1G022300	0.0674732	0.679755
HORVU0Hr1G022310	0.0902596	0.698153
HORVU0Hr1G022320	0	-
HORVU0Hr1G022330	0.996521	0.432969
HORVU0Hr1G022340	0.573396	0.228948
HORVU0Hr1G022350	-2.79995	0.292151
HORVU0Hr1G022360	2.79784	0.0346201
HORVU0Hr1G022370	0.645687	0.283378
HORVU0Hr1G022380	0.190331	0.718697
HORVU0Hr1G022390	0	-
HORVU0Hr1G022440	0.848465	0.0428516
HORVU0Hr1G022450	-0.0139456	0.986668
HORVU0Hr1G022460	0.229706	0.290271
HORVU0Hr1G022470	-0.374199	0.220991
HORVU0Hr1G022480	-0.147364	0.697068
HORVU0Hr1G022500	-0.249421	0.331156
HORVU0Hr1G022510	0.204654	0.252279
HORVU0Hr1G022520	0	-
HORVU0Hr1G022540	0	-
HORVU0Hr1G022550	0.4354	0.433123
HORVU0Hr1G022570	0	-
HORVU0Hr1G022580	0.0695255	0.783887
HORVU0Hr1G022590	1.60662	0.000710482
HORVU0Hr1G022610	3.7143	0.0305029
HORVU0Hr1G022650	2.93394	0.10446
HORVU0Hr1G022670	1.54278	0.00051447
HORVU0Hr1G022680	0	-
HORVU0Hr1G022690	1.5966	0.16914
HORVU0Hr1G022730	0	-
HORVU0Hr1G022740	0	-
HORVU0Hr1G022750	0	-
HORVU0Hr1G022770	0	-
HORVU0Hr1G022780	-0.842172	0.548332
HORVU0Hr1G022790	0	-
HORVU0Hr1G022810	0.219171	0.419476
HORVU0Hr1G022820	-2.68903	0.00578256
HORVU0Hr1G022830	0.392716	0.0579633
HORVU0Hr1G022870	0	-
HORVU0Hr1G023050	0	-
HORVU0Hr1G023060	0	-
HORVU0Hr1G023080	0	-
HORVU0Hr1G023090	0	-
HORVU0Hr1G023120	0	-
HORVU0Hr1G023140	-0.371576	0.248701
HORVU0Hr1G023150	0.568448	0.115544
HORVU0Hr1G023160	0	-
HORVU0Hr1G023170	0	-
HORVU0Hr1G023180	0.440655	0.148026
HORVU0Hr1G023190	0	-
HORVU0Hr1G023200	-0.305244	0.34899
HORVU0Hr1G023240	0	-
HORVU0Hr1G023250	0.270638	0.418126
HORVU0Hr1G023260	0	-
HORVU0Hr1G023280	-0.162952	0.48245
HORVU0Hr1G023290	-0.185382	0.519078
HORVU0Hr1G023300	0.407337	0.0334156
HORVU0Hr1G023320	0	-
HORVU0Hr1G023330	2.23077	0.000710482
HORVU0Hr1G023360	-2.98223	0.0242736
HORVU0Hr1G023420	0	-
HORVU0Hr1G023460	-0.224874	0.297354
HORVU0Hr1G023470	-0.890093	0.00192274
HORVU0Hr1G023480	-0.376961	0.592988
HORVU0Hr1G023490	0	-
HORVU0Hr1G023510	0.0181225	0.937391
HORVU0Hr1G023540	0.254332	0.594686
HORVU0Hr1G023570	-6.75012	0.0272703
HORVU0Hr1G023590	3.92294	0.0421846
HORVU0Hr1G023600	0	-
HORVU0Hr1G023610	0	-
HORVU0Hr1G023640	0.100249	0.715508
HORVU0Hr1G023660	0.514297	0.151869
HORVU0Hr1G023690	0	-
HORVU0Hr1G023700	0	-
HORVU0Hr1G023710	0	-
HORVU0Hr1G023720	0	-
HORVU0Hr1G023740	-0.560593	0.350773
HORVU0Hr1G023750	0.0209975	0.960259
HORVU0Hr1G023760	0.0396282	0.921727
HORVU0Hr1G023810	0	-
HORVU0Hr1G023830	0	-
HORVU0Hr1G023840	0	-
HORVU0Hr1G023870	0.491082	0.482077
HORVU0Hr1G023890	0.487348	0.482112
HORVU0Hr1G023910	0.48969	0.482677
HORVU0Hr1G023920	0.504907	0.467261
HORVU0Hr1G023930	0.482808	0.428599
HORVU0Hr1G023940	0.300828	0.635955
HORVU0Hr1G023950	0	-
HORVU0Hr1G023970	0.459668	0.430787
HORVU0Hr1G023980	0.508376	0.345388
HORVU0Hr1G023990	0.791508	0.111488
HORVU0Hr1G024020	0.648405	0.366966
HORVU0Hr1G024030	0.505414	0.462449
HORVU0Hr1G024050	-0.816691	0.237384
HORVU0Hr1G024060	0.71519	0.488954
HORVU0Hr1G024070	-0.852118	0.230829
HORVU0Hr1G024100	0	-
HORVU0Hr1G024120	0.451871	0.516797
HORVU0Hr1G024130	0.557144	0.309563
HORVU0Hr1G024140	0.535529	0.611496
HORVU0Hr1G024160	0.544146	0.346106
HORVU0Hr1G024170	0.52272	0.456243
HORVU0Hr1G024180	0.447103	0.511296
HORVU0Hr1G024190	0	-
HORVU0Hr1G024200	1.61696	0.00990342
HORVU0Hr1G024220	0.4529	0.377634
HORVU0Hr1G024230	0.380694	0.630688
HORVU0Hr1G024270	0.45317	0.377254
HORVU0Hr1G024280	0.365672	0.487937
HORVU0Hr1G024300	0.487271	0.482112
HORVU0Hr1G024310	0	-
HORVU0Hr1G024320	-0.0867088	0.85037
HORVU0Hr1G024390	0	-
HORVU0Hr1G024400	0	-
HORVU0Hr1G024440	-0.377566	0.742419
HORVU0Hr1G024450	-0.784242	0.220592
HORVU0Hr1G024460	0	-
HORVU0Hr1G024470	-2.06663	0.0647197
HORVU0Hr1G024480	0.143166	0.795806
HORVU0Hr1G024490	0.0751069	0.863559
HORVU0Hr1G024520	0.676289	0.434153
HORVU0Hr1G024530	-0.142077	0.793614
HORVU0Hr1G024540	-0.167652	0.69102
HORVU0Hr1G024550	0.207711	0.69238
HORVU0Hr1G024560	0.758252	0.234569
HORVU0Hr1G024580	0.230084	0.678647
HORVU0Hr1G024610	-0.743871	0.231393
HORVU0Hr1G024620	0.0443582	0.922397
HORVU0Hr1G024630	0.153732	0.833161
HORVU0Hr1G024650	0.623122	0.442786
HORVU0Hr1G024670	-0.733628	0.209623
HORVU0Hr1G024680	0.0443582	0.922397
HORVU0Hr1G024690	0	-
HORVU0Hr1G024700	-0.297243	0.58129
HORVU0Hr1G024720	-0.359327	0.400216
HORVU0Hr1G024740	0.0982763	0.643887
HORVU0Hr1G024750	-0.377566	0.742419
HORVU0Hr1G024760	-0.043563	0.957108
HORVU0Hr1G024790	0.776777	0.204787
HORVU0Hr1G024810	-0.0421888	0.946425
HORVU0Hr1G024830	-0.289781	0.594085
HORVU0Hr1G024840	0	-
HORVU0Hr1G024880	0.903785	0.150693
HORVU0Hr1G024890	0.663392	0.295094
HORVU0Hr1G024900	-0.450899	0.303672
HORVU0Hr1G024920	0.145207	0.74043
HORVU0Hr1G024930	0.680561	0.254334
HORVU0Hr1G024950	0.0326418	0.972485
HORVU0Hr1G024960	-0.0229503	0.955309
HORVU0Hr1G024970	-1.21215	0.166819
HORVU0Hr1G024980	-0.142077	0.793614
HORVU0Hr1G024990	0.681729	0.627301
HORVU0Hr1G025010	-0.324768	0.520396
HORVU0Hr1G025040	-0.693376	0.243881
HORVU0Hr1G025100	0.650859	0.636592
HORVU0Hr1G025110	-0.845089	0.489057
HORVU0Hr1G025120	0.814278	0.219451
HORVU0Hr1G025160	0.861974	0.141981
HORVU0Hr1G025180	-0.936581	0.412847
HORVU0Hr1G025190	0.178099	0.803739
HORVU0Hr1G025220	-0.962415	0.0844775
HORVU0Hr1G025240	-0.497503	0.489407
HORVU0Hr1G025250	0	-
HORVU0Hr1G025290	0	-
HORVU0Hr1G025310	0	-
HORVU0Hr1G025330	0	-
HORVU0Hr1G025370	0	-
HORVU0Hr1G025390	0	-
HORVU0Hr1G025410	-0.130773	0.753857
HORVU0Hr1G025420	0	-
HORVU0Hr1G025430	0	-
HORVU0Hr1G025440	1.70567	0.017305
HORVU0Hr1G025460	-0.0536613	0.959079
HORVU0Hr1G025520	0	-
HORVU0Hr1G025530	0	-
HORVU0Hr1G025540	0.100841	0.680296
HORVU0Hr1G025620	0	-
HORVU0Hr1G025630	-0.46104	0.500761
HORVU0Hr1G025650	-1.24039	0.140422
HORVU0Hr1G025660	0	-
HORVU0Hr1G025670	0	-
HORVU0Hr1G025690	0	-
HORVU0Hr1G025700	0.947097	0.557884
HORVU0Hr1G025750	0	-
HORVU0Hr1G025760	0	-
HORVU0Hr1G025770	0	-
HORVU0Hr1G025790	1.36211	0.0159977
HORVU0Hr1G025800	3.68337	0.0180019
HORVU0Hr1G025810	3.39556	0.0270875
HORVU0Hr1G025820	0.230865	0.536757
HORVU0Hr1G025850	0.555911	0.322202
HORVU0Hr1G025860	0.250348	0.469376
HORVU0Hr1G025870	0.498878	0.0553055
HORVU0Hr1G025890	0.638079	0.0650667
HORVU0Hr1G025900	0.379302	0.142564
HORVU0Hr1G025910	-0.977115	0.0228313
HORVU0Hr1G025920	0.232032	0.539833
HORVU0Hr1G025970	0	-
HORVU0Hr1G026010	0.244068	0.473014
HORVU0Hr1G026030	-0.0280472	0.953856
HORVU0Hr1G026070	0.193864	0.714101
HORVU0Hr1G026090	0.881692	0.162737
HORVU0Hr1G026120	0.211318	0.813172
HORVU0Hr1G026130	-0.673979	0.49227
HORVU0Hr1G026140	-0.208945	0.74043
HORVU0Hr1G026150	-0.448236	0.252169
HORVU0Hr1G026160	-0.173068	0.831689
HORVU0Hr1G026170	0.0443582	0.922397
HORVU0Hr1G026190	0.0446856	0.945971
HORVU0Hr1G026200	0.0340405	0.962207
HORVU0Hr1G026230	0.155956	0.745891
HORVU0Hr1G026250	0.19112	0.799279
HORVU0Hr1G026260	-0.253571	0.721473
HORVU0Hr1G026270	0.0469691	0.949489
HORVU0Hr1G026280	0.0217071	0.975298
HORVU0Hr1G026290	0.0443582	0.922397
HORVU0Hr1G026330	0.176236	0.797042
HORVU0Hr1G026340	0	-
HORVU0Hr1G026370	0	-
HORVU0Hr1G026390	0	-
HORVU0Hr1G026410	0	-
HORVU0Hr1G026430	0.27217	0.637842
HORVU0Hr1G026480	-0.313915	0.61958
HORVU0Hr1G026500	-0.336074	0.352311
HORVU0Hr1G026520	0	-
HORVU0Hr1G026530	0	-
HORVU0Hr1G026540	0	-
HORVU0Hr1G026550	0	-
HORVU0Hr1G026560	0	-
HORVU0Hr1G026590	0.605934	0.596953
HORVU0Hr1G026620	0	-
HORVU0Hr1G026630	0	-
HORVU0Hr1G026640	0.284108	0.596277
HORVU0Hr1G026650	2.49291	0.00107505
HORVU0Hr1G026660	0	-
HORVU0Hr1G026690	0	-
HORVU0Hr1G026700	0.69681	0.0358269
HORVU0Hr1G026710	0.0335164	0.969911
HORVU0Hr1G026730	0	-
HORVU0Hr1G026770	0.155956	0.745891
HORVU0Hr1G026780	-0.423367	0.629708
HORVU0Hr1G026790	0.153409	0.852213
HORVU0Hr1G026800	-0.263164	0.713324
HORVU0Hr1G026810	0.0553622	0.938062
HORVU0Hr1G026820	-0.218511	0.675807
HORVU0Hr1G026830	0.0443582	0.922397
HORVU0Hr1G026860	-0.305591	0.735581
HORVU0Hr1G026870	0.15014	0.853536
HORVU0Hr1G026890	0.596073	0.240905
HORVU0Hr1G026900	0.155954	0.746269
HORVU0Hr1G026910	0.957017	0.163478
HORVU0Hr1G026930	0	-
HORVU0Hr1G026940	-0.612544	0.375353
HORVU0Hr1G026950	0.155954	0.746269
HORVU0Hr1G026990	-0.932344	0.42678
HORVU0Hr1G027000	-0.900749	0.464481
HORVU0Hr1G027010	-0.531117	0.00595311
HORVU0Hr1G027030	0	-
HORVU0Hr1G027050	-0.0334104	0.953872
HORVU0Hr1G027060	-0.0617545	0.740939
HORVU0Hr1G027070	-0.409388	0.252334
HORVU0Hr1G027080	-0.202664	0.537202
HORVU0Hr1G027100	0	-
HORVU0Hr1G027130	0.16842	0.559151
HORVU0Hr1G027160	0.457439	0.104536
HORVU0Hr1G027170	-0.101589	0.679957
HORVU0Hr1G027200	0.0622744	0.963835
HORVU0Hr1G027230	0.457439	0.104536
HORVU0Hr1G027280	0	-
HORVU0Hr1G027290	-0.465764	0.0622941
HORVU0Hr1G027310	0.019368	0.974228
HORVU0Hr1G027380	0	-
HORVU0Hr1G027400	0	-
HORVU0Hr1G027410	-0.552204	0.601751
HORVU0Hr1G027430	0.822983	0.114124
HORVU0Hr1G027440	-1.33793	0.0137504
HORVU0Hr1G027450	0	-
HORVU0Hr1G027460	-0.978335	0.151217
HORVU0Hr1G027480	0	-
HORVU0Hr1G027490	-0.977115	0.0228313
HORVU0Hr1G027510	0.469994	0.409572
HORVU0Hr1G027520	0.0266482	0.969348
HORVU0Hr1G027540	0.114669	0.808239
HORVU0Hr1G027550	-0.607232	0.136044
HORVU0Hr1G027560	0.300328	0.751793
HORVU0Hr1G027570	0	-
HORVU0Hr1G027600	0.257144	0.651014
HORVU0Hr1G027620	0.803469	0.185584
HORVU0Hr1G027640	-0.574336	0.335743
HORVU0Hr1G027660	-0.120523	0.721665
HORVU0Hr1G027670	0.627157	0.030062
HORVU0Hr1G027680	-0.153391	0.355859
HORVU0Hr1G027900	0.0455427	0.925937
HORVU0Hr1G027910	-0.0648859	0.909591
HORVU0Hr1G027920	0	-
HORVU0Hr1G027940	0	-
HORVU0Hr1G027960	0.143447	0.732249
HORVU0Hr1G027970	-0.263365	0.196385
HORVU0Hr1G027980	-0.415319	0.671295
HORVU0Hr1G027990	0	-
HORVU0Hr1G028010	0.0932346	0.697762
HORVU0Hr1G028040	0	-
HORVU0Hr1G028080	-0.260778	0.256513
HORVU0Hr1G028130	1.56364	0.0025445
HORVU0Hr1G028140	1.33364	0.026069
HORVU0Hr1G028170	0.463561	0.0500398
HORVU0Hr1G028210	0	-
HORVU0Hr1G028230	0.778078	0.165196
HORVU0Hr1G028270	0.223549	0.523499
HORVU0Hr1G028300	0	-
HORVU0Hr1G028320	-0.977115	0.0228313
HORVU0Hr1G028350	-0.581925	0.130242
HORVU0Hr1G028360	-0.267511	0.711409
HORVU0Hr1G028370	0.114349	0.875289
HORVU0Hr1G028380	0.0266569	0.969524
HORVU0Hr1G028390	0.0443582	0.922397
HORVU0Hr1G028400	-0.746885	0.223167
HORVU0Hr1G028410	-0.0194334	0.978937
HORVU0Hr1G028420	0.211318	0.813172
HORVU0Hr1G028450	0.230084	0.678647
HORVU0Hr1G028470	0.274612	0.624302
HORVU0Hr1G028480	-0.132287	0.790585
HORVU0Hr1G028530	0.116997	0.829381
HORVU0Hr1G028540	-0.875082	0.178614
HORVU0Hr1G028550	0	-
HORVU0Hr1G028560	-0.961646	0.405661
HORVU0Hr1G028570	-2.06663	0.0647197
HORVU0Hr1G028580	-0.784242	0.220592
HORVU0Hr1G028590	-0.377566	0.742419
HORVU0Hr1G028600	-0.560846	0.548471
HORVU0Hr1G028640	-0.932344	0.42678
HORVU0Hr1G028650	0.155956	0.745891
HORVU0Hr1G028660	0.815728	0.332206
HORVU0Hr1G028670	-0.392472	0.238954
HORVU0Hr1G028680	1.35988	0.0259429
HORVU0Hr1G028710	-0.313769	0.445993
HORVU0Hr1G028890	0	-
HORVU0Hr1G028900	0.520158	0.64719
HORVU0Hr1G028920	-0.375313	0.706525
HORVU0Hr1G028930	0.205392	0.434521
HORVU0Hr1G028950	-0.78508	0.200598
HORVU0Hr1G028970	0.505305	0.344925
HORVU0Hr1G028990	0.4418	0.0362661
HORVU0Hr1G029050	1.52416	0.0197326
HORVU0Hr1G029090	-0.135245	0.796443
HORVU0Hr1G029100	0	-
HORVU0Hr1G029110	0	-
HORVU0Hr1G029140	-0.336622	0.356937
HORVU0Hr1G029180	-0.981867	0.0402575
HORVU0Hr1G029190	-0.728332	0.215644
HORVU0Hr1G029200	1.77913	0.00254717
HORVU0Hr1G029210	0	-
HORVU0Hr1G029220	0	-
HORVU0Hr1G029230	0	-
HORVU0Hr1G029310	0.432188	0.428746
HORVU0Hr1G029320	0.420237	0.441018
HORVU0Hr1G029340	0.476871	0.363432
HORVU0Hr1G029350	0.636195	0.254772
HORVU0Hr1G029370	-0.166524	0.695954
HORVU0Hr1G029460	0.420997	0.50735
HORVU0Hr1G029480	0.79719	0.205244
HORVU0Hr1G029490	0	-
HORVU0Hr1G029500	0.160992	0.798512
HORVU0Hr1G029520	0.0787886	0.862007
HORVU0Hr1G029570	0	-
HORVU0Hr1G029590	-0.820703	0.0517027
HORVU0Hr1G029600	0.149544	0.716936
HORVU0Hr1G029660	0.815728	0.332206
HORVU0Hr1G029670	0.0879716	0.707157
HORVU0Hr1G029680	-0.377566	0.742419
HORVU0Hr1G029690	-0.784242	0.220592
HORVU0Hr1G029720	-0.329788	0.2165
HORVU0Hr1G029730	-0.0660578	0.878718
HORVU0Hr1G029750	0.0912306	0.883471
HORVU0Hr1G029760	-0.0871958	0.879184
HORVU0Hr1G029770	0.22715	0.666605
HORVU0Hr1G029780	0.429774	0.49693
HORVU0Hr1G029790	0.788324	0.166819
HORVU0Hr1G029810	0.254785	0.630868
HORVU0Hr1G029850	0.890442	0.425254
HORVU0Hr1G029860	-0.756131	0.233617
HORVU0Hr1G029870	0.211318	0.813172
HORVU0Hr1G029880	-0.673979	0.49227
HORVU0Hr1G029890	-0.208945	0.74043
HORVU0Hr1G029900	-0.448236	0.252169
HORVU0Hr1G029910	0.167267	0.61831
HORVU0Hr1G029920	-0.733628	0.209623
HORVU0Hr1G029930	0.0443582	0.922397
HORVU0Hr1G029960	-0.140237	0.770863
HORVU0Hr1G029980	0	-
HORVU0Hr1G030000	0	-
HORVU0Hr1G030010	-0.366018	0.168404
HORVU0Hr1G030030	0	-
HORVU0Hr1G030060	0	-
HORVU0Hr1G030080	-0.0590625	0.942899
HORVU0Hr1G030090	0.0220368	0.984384
HORVU0Hr1G030100	0	-
HORVU0Hr1G030120	-0.498764	0.0585409
HORVU0Hr1G030130	0	-
HORVU0Hr1G030140	0	-
HORVU0Hr1G030160	-2.82749	0.00306683
HORVU0Hr1G030170	0	-
HORVU0Hr1G030190	-0.267259	0.520652
HORVU0Hr1G030200	0.309241	0.28358
HORVU0Hr1G030280	-0.678215	0.0280353
HORVU0Hr1G030300	-0.910438	0.00168317
HORVU0Hr1G030310	0	-
HORVU0Hr1G030360	0	-
HORVU0Hr1G030370	0	-
HORVU0Hr1G030380	0	-
HORVU0Hr1G030390	0	-
HORVU0Hr1G030440	-0.449864	0.0202926
HORVU0Hr1G030450	0.962763	0.00453755
HORVU0Hr1G030460	-0.228073	0.332732
HORVU0Hr1G030500	2.98178	0.0249651
HORVU0Hr1G030510	0	-
HORVU0Hr1G030520	-0.258837	0.877377
HORVU0Hr1G030570	0	-
HORVU0Hr1G030600	-0.298597	0.766583
HORVU0Hr1G030630	0.51389	0.299756
HORVU0Hr1G030640	0.460395	0.368961
HORVU0Hr1G030650	0	-
HORVU0Hr1G030660	0	-
HORVU0Hr1G030670	0	-
HORVU0Hr1G030680	0	-
HORVU0Hr1G030690	0.0217071	0.975298
HORVU0Hr1G030700	0.114669	0.808239
HORVU0Hr1G030710	0.300328	0.751793
HORVU0Hr1G030740	0.295452	0.576442
HORVU0Hr1G030760	0.654638	0.205395
HORVU0Hr1G030770	-0.065881	0.899671
HORVU0Hr1G030780	0.229742	0.676278
HORVU0Hr1G030810	-0.113481	0.743884
HORVU0Hr1G030820	0.0151561	0.970478
HORVU0Hr1G030830	-3.17065	0.00453755
HORVU0Hr1G030860	0	-
HORVU0Hr1G030870	0	-
HORVU0Hr1G030920	0.0778398	0.745803
HORVU0Hr1G030950	0	-
HORVU0Hr1G030970	0	-
HORVU0Hr1G030980	0.43786	0.082435
HORVU0Hr1G031050	-0.238182	0.811702
HORVU0Hr1G031060	-0.420532	0.626292
HORVU0Hr1G031070	-0.516629	0.278326
HORVU0Hr1G031080	0	-
HORVU0Hr1G031100	0	-
HORVU0Hr1G031130	0	-
HORVU0Hr1G031140	1.00612	0.289011
HORVU0Hr1G031170	0.958404	0.00217903
HORVU0Hr1G031210	0	-
HORVU0Hr1G031250	-0.932344	0.42678
HORVU0Hr1G031270	0.788274	0.166819
HORVU0Hr1G031290	0.0805817	0.929768
HORVU0Hr1G031300	0.171214	0.693203
HORVU0Hr1G031330	0.660792	0.296617
HORVU0Hr1G031350	0.596948	0.479627
HORVU0Hr1G031360	0.20509	0.729924
HORVU0Hr1G031380	0.587253	0.5907
HORVU0Hr1G031420	-0.17075	0.553064
HORVU0Hr1G031430	-0.142077	0.793614
HORVU0Hr1G031440	-0.208945	0.74043
HORVU0Hr1G031450	-0.314006	0.451445
HORVU0Hr1G031470	0.29587	0.585376
HORVU0Hr1G031480	0.167332	0.737901
HORVU0Hr1G031500	0.673256	0.0235646
HORVU0Hr1G031520	0.266994	0.295763
HORVU0Hr1G031580	1.10626	0.606751
HORVU0Hr1G031620	0	-
HORVU0Hr1G031630	0	-
HORVU0Hr1G031640	0	-
HORVU0Hr1G031650	0	-
HORVU0Hr1G031660	0	-
HORVU0Hr1G031690	-0.587378	0.0233609
HORVU0Hr1G031700	1.33264	0.0242883
HORVU0Hr1G031710	-0.969241	0.173041
HORVU0Hr1G031720	0.319879	0.471008
HORVU0Hr1G031730	-0.313312	0.445614
HORVU0Hr1G031750	0	-
HORVU0Hr1G031760	0.055872	0.788561
HORVU0Hr1G031790	0	-
HORVU0Hr1G031810	-0.23142	0.459315
HORVU0Hr1G031830	0	-
HORVU0Hr1G031850	1.31666	0.000750712
HORVU0Hr1G031890	0.0877355	0.849939
HORVU0Hr1G031910	0	-
HORVU0Hr1G031920	-0.473366	0.375353
HORVU0Hr1G031930	-3.25922	0.0299382
HORVU0Hr1G031950	0.71519	0.488954
HORVU0Hr1G031960	0.590236	0.00830875
HORVU0Hr1G031970	0.805139	0.0956119
HORVU0Hr1G031980	-0.570511	0.00480469
HORVU0Hr1G031990	0	-
HORVU0Hr1G032000	0.500508	0.660168
HORVU0Hr1G032020	-0.319254	0.756295
HORVU0Hr1G032040	0	-
HORVU0Hr1G032060	0	-
HORVU0Hr1G032070	-0.765437	0.211488
HORVU0Hr1G032100	4.14957	0.0764557
HORVU0Hr1G032110	-0.0844215	0.86891
HORVU0Hr1G032120	0.164687	0.618767
HORVU0Hr1G032130	0	-
HORVU0Hr1G032140	-0.900749	0.464481
HORVU0Hr1G032200	0	-
HORVU0Hr1G032220	0	-
HORVU0Hr1G032230	-0.985202	0.159185
HORVU0Hr1G032250	-0.462056	0.294479
HORVU0Hr1G032260	-0.0993	0.863373
HORVU0Hr1G032280	0.175298	0.769373
HORVU0Hr1G032300	0	-
HORVU0Hr1G032310	0	-
HORVU0Hr1G032320	-0.860589	0.0180981
HORVU0Hr1G032330	-0.860589	0.0180981
HORVU0Hr1G032340	0	-
HORVU0Hr1G032350	-0.771666	0.345656
HORVU0Hr1G032360	0.444425	0.10033
HORVU0Hr1G032370	0.417771	0.693231
HORVU0Hr1G032390	-0.44864	0.0531723
HORVU0Hr1G032400	0.632093	0.072511
HORVU0Hr1G032410	0	-
HORVU0Hr1G032440	0	-
HORVU0Hr1G032490	2.0985	0.176081
HORVU0Hr1G032510	0	-
HORVU0Hr1G032540	-0.778352	0.200138
HORVU0Hr1G032560	0	-
HORVU0Hr1G032570	0.171214	0.693203
HORVU0Hr1G032600	-0.0567387	0.942359
HORVU0Hr1G032620	0.0805817	0.929768
HORVU0Hr1G032640	0.663117	0.294677
HORVU0Hr1G032670	0	-
HORVU0Hr1G032690	0	-
HORVU0Hr1G032700	0	-
HORVU0Hr1G032710	-0.740362	0.274454
HORVU0Hr1G032720	0	-
HORVU0Hr1G032730	-0.875082	0.178614
HORVU0Hr1G032740	0.143166	0.795806
HORVU0Hr1G032800	-0.0900169	0.883275
HORVU0Hr1G032810	-0.184612	0.656724
HORVU0Hr1G032820	-0.132287	0.790585
HORVU0Hr1G032830	0.146997	0.786676
HORVU0Hr1G032840	0	-
HORVU0Hr1G032850	0	-
HORVU0Hr1G032860	0	-
HORVU0Hr1G032870	0	-
HORVU0Hr1G032890	0	-
HORVU0Hr1G032900	0	-
HORVU0Hr1G032910	0.155954	0.746269
HORVU0Hr1G032920	-0.249103	0.726401
HORVU0Hr1G032930	0.0268763	0.971303
HORVU0Hr1G032940	0.0345108	0.959238
HORVU0Hr1G032950	0.0443582	0.922397
HORVU0Hr1G032960	-0.0194334	0.978937
HORVU0Hr1G032970	0.216031	0.809291
HORVU0Hr1G032980	0.571515	0.70394
HORVU0Hr1G033000	0.290515	0.559881
HORVU0Hr1G033020	-0.000994324	0.999308
HORVU0Hr1G033030	0.914777	0.1789
HORVU0Hr1G033050	0.170378	0.780699
HORVU0Hr1G033060	0.29587	0.585376
HORVU0Hr1G033070	-0.0367863	0.951572
HORVU0Hr1G033090	0.606279	0.639457
HORVU0Hr1G033120	0	-
HORVU0Hr1G033130	-0.932344	0.42678
HORVU0Hr1G033160	0	-
HORVU0Hr1G033170	0	-
HORVU0Hr1G033190	0	-
HORVU0Hr1G033200	0.192941	0.570979
HORVU0Hr1G033220	0	-
HORVU0Hr1G033250	0	-
HORVU0Hr1G033260	0.560496	0.308008
HORVU0Hr1G033280	0.230084	0.678647
HORVU0Hr1G033290	-0.518865	0.57105
HORVU0Hr1G033300	0.606279	0.639457
HORVU0Hr1G033320	0	-
HORVU0Hr1G033330	0.248714	0.517627
HORVU0Hr1G033360	0.538915	0.459434
HORVU0Hr1G033370	0.472374	0.523723
HORVU0Hr1G033410	0.155956	0.745891
HORVU0Hr1G033420	0.184422	0.800386
HORVU0Hr1G033440	0.0579774	0.935636
HORVU0Hr1G033450	-0.00143755	0.999056
HORVU0Hr1G033460	0.0443582	0.922397
HORVU0Hr1G033470	-0.0194334	0.978937
HORVU0Hr1G033480	-0.673979	0.49227
HORVU0Hr1G033490	0.211318	0.813172
HORVU0Hr1G033520	0.230084	0.678647
HORVU0Hr1G033540	-0.409638	0.621966
HORVU0Hr1G033550	-1.96295	0.0156307
HORVU0Hr1G033560	-1.34286	0.137152
HORVU0Hr1G033570	-0.02252	0.956179
HORVU0Hr1G033600	-0.932344	0.42678
HORVU0Hr1G033630	-0.678934	0.0695937
HORVU0Hr1G033640	0	-
HORVU0Hr1G033660	-0.253099	0.32227
HORVU0Hr1G033670	0	-
HORVU0Hr1G033690	0.161295	0.833729
HORVU0Hr1G033700	-0.254642	0.722371
HORVU0Hr1G033710	0.0340405	0.962207
HORVU0Hr1G033720	-0.160221	0.766576
HORVU0Hr1G033730	0.00620059	0.989985
HORVU0Hr1G033740	-0.0194334	0.978937
HORVU0Hr1G033750	0.211318	0.813172
HORVU0Hr1G033770	0.230084	0.678647
HORVU0Hr1G033790	0.424495	0.534089
HORVU0Hr1G033800	0.29587	0.585376
HORVU0Hr1G033810	-0.132287	0.790585
HORVU0Hr1G033820	-0.119983	0.828117
HORVU0Hr1G033850	0.815728	0.332206
HORVU0Hr1G033860	-0.377566	0.742419
HORVU0Hr1G033870	-1.97942	0.0737108
HORVU0Hr1G033880	-0.882933	0.44696
HORVU0Hr1G033890	0	-
HORVU0Hr1G033900	0.143166	0.795806
HORVU0Hr1G033940	0	-
HORVU0Hr1G033970	-0.932344	0.42678
HORVU0Hr1G033990	-1.96295	0.0156307
HORVU0Hr1G034000	-1.34286	0.137152
HORVU0Hr1G034010	-0.02252	0.956179
HORVU0Hr1G034040	0.114061	0.817297
HORVU0Hr1G034050	-1.96295	0.0156307
HORVU0Hr1G034080	0	-
HORVU0Hr1G034090	0	-
HORVU0Hr1G034110	0	-
HORVU0Hr1G034120	0	-
HORVU0Hr1G034130	0	-
HORVU0Hr1G034150	-0.339794	0.604688
HORVU0Hr1G034160	-0.560235	0.378241
HORVU0Hr1G034190	-2.06663	0.0647197
HORVU0Hr1G034210	0.663079	0.29469
HORVU0Hr1G034240	-1.0733	0.114566
HORVU0Hr1G034250	0.109337	0.744881
HORVU0Hr1G034260	-0.814873	0.206489
HORVU0Hr1G034280	0.587253	0.5907
HORVU0Hr1G034290	0.635478	0.231392
HORVU0Hr1G034300	0.660655	0.398922
HORVU0Hr1G034320	1.00158	0.139162
HORVU0Hr1G034330	0.211318	0.813172
HORVU0Hr1G034340	-0.073875	0.893676
HORVU0Hr1G034350	-0.214326	0.523499
HORVU0Hr1G034370	-0.173493	0.808971
HORVU0Hr1G034380	0.130632	0.761233
HORVU0Hr1G034420	-1.24448	0.173456
HORVU0Hr1G034430	-0.914708	0.318028
HORVU0Hr1G034460	0.0443582	0.922397
HORVU0Hr1G034470	0.298911	0.678647
HORVU0Hr1G034480	0.266828	0.653352
HORVU0Hr1G034500	-1.17423	0.116885
HORVU0Hr1G034510	0.724205	0.569384
HORVU0Hr1G034520	-0.381765	0.54845
HORVU0Hr1G034540	0.226288	0.668306
HORVU0Hr1G034550	0.177084	0.674938
HORVU0Hr1G034600	0.181328	0.707219
HORVU0Hr1G034610	0.748066	0.180621
HORVU0Hr1G034630	-0.241472	0.713492
HORVU0Hr1G034640	0.137238	0.8484
HORVU0Hr1G034650	0.119726	0.89543
HORVU0Hr1G034660	-0.352512	0.69224
HORVU0Hr1G034700	0.221556	0.74814
HORVU0Hr1G034720	-0.511694	0.215595
HORVU0Hr1G034730	-0.17075	0.553064
HORVU0Hr1G034740	0.892829	0.16198
HORVU0Hr1G034750	0.660655	0.398922
HORVU0Hr1G034770	-0.17075	0.553064
HORVU0Hr1G034780	0.649892	0.289939
HORVU0Hr1G034790	0.171214	0.693203
HORVU0Hr1G034800	0.932731	0.0755849
HORVU0Hr1G034830	-0.236491	0.459703
HORVU0Hr1G034850	0.498442	0.444745
HORVU0Hr1G034860	-0.958663	0.407091
HORVU0Hr1G034900	0	-
HORVU0Hr1G034910	0	-
HORVU0Hr1G034930	0.81783	0.201564
HORVU0Hr1G034940	0.733483	0.247156
HORVU0Hr1G034950	0.96599	0.153871
HORVU0Hr1G034960	0.224548	0.639154
HORVU0Hr1G034970	0.751799	0.276562
HORVU0Hr1G034980	0.442976	0.412718
HORVU0Hr1G035010	0	-
HORVU0Hr1G035030	-0.375313	0.706525
HORVU0Hr1G035060	0	-
HORVU0Hr1G035110	0	-
HORVU0Hr1G035140	0	-
HORVU0Hr1G035160	0.155956	0.745891
HORVU0Hr1G035170	0.0443582	0.922397
HORVU0Hr1G035180	-0.0194334	0.978937
HORVU0Hr1G035190	0.211318	0.813172
HORVU0Hr1G035200	0.587253	0.5907
HORVU0Hr1G035230	0.664896	0.593675
HORVU0Hr1G035250	-0.02252	0.956179
HORVU0Hr1G035260	-1.34286	0.137152
HORVU0Hr1G035270	-1.96295	0.0156307
HORVU0Hr1G035280	-0.267511	0.711409
HORVU0Hr1G035290	0.136044	0.85217
HORVU0Hr1G035300	-0.932344	0.42678
HORVU0Hr1G035310	0.0155731	0.977309
HORVU0Hr1G035320	0.503388	0.331836
HORVU0Hr1G035340	-0.258837	0.877377
HORVU0Hr1G035420	0	-
HORVU0Hr1G035430	0	-
HORVU0Hr1G035440	0	-
HORVU0Hr1G035460	0.502651	0.46123
HORVU0Hr1G035470	0.475859	0.459138
HORVU0Hr1G035530	0.385798	0.583862
HORVU0Hr1G035540	0	-
HORVU0Hr1G035560	-0.266023	0.187274
HORVU0Hr1G035570	0	-
[truncated: 37,842 more rows]

## Sheet: ls_win1-ls_wt
gene	log2(FC)	FDR
AGP50735	-0.67008	0.151447
AGP50736	0.836719	0.413474
AGP50737	-0.424194	0.339183
AGP50738	0.272165	0.833427
AGP50739	0.292956	0.867621
AGP50740	-0.205798	0.429387
AGP50741	-0.0557971	0.877394
AGP50742	0.910917	0.488219
AGP50743	-0.717672	0.376748
AGP50744	-0.0236713	0.990455
AGP50745	0.00270084	0.998314
AGP50746	-0.157332	0.868498
AGP50747	0.340986	0.702131
AGP50748	0.362185	0.699396
AGP50749	-0.0314137	0.972647
AGP50750	-0.387743	0.603868
AGP50751	-0.460848	0.326368
AGP50752	-0.239826	0.6001
AGP50753	-0.0137089	0.975596
AGP50754	-0.0310512	0.949263
AGP50755	-0.0618476	0.917128
AGP50756	0.0714254	0.937631
AGP50757	0.578485	0.513222
AGP50758	0.000440252	0.999766
AGP50759	0.0355158	0.963672
AGP50760	-0.326605	0.577964
AGP50761	-0.153721	0.839663
AGP50762	-0.119588	0.891394
AGP50763	-0.210241	0.810564
AGP50764	0	-
AGP50765	-0.10265	0.915226
AGP50766	0.34165	0.701944
AGP50767	0.0145615	0.986547
AGP50768	-0.319208	0.513356
AGP50769	0.432802	0.528504
AGP50770	-0.117216	0.880398
AGP50771	-0.146273	0.84751
AGP50772	-0.535121	0.725126
AGP50773	0.0982	0.948452
AGP50774	0.226455	0.871243
AGP50775	0.195931	0.876042
AGP50776	0.174539	0.915226
AGP50777	0.0518487	0.960193
AGP50779	-0.422147	0.399053
AGP50780	-0.264681	0.496625
AGP50781	0.570757	0.580925
AGP50782	-0.332233	0.683615
AGP50783	-0.390667	0.40641
AGP50784	-0.377846	0.276017
AGP50785	-0.486447	0.224423
AGP50786	0.613023	0.316214
AGP50787	0.629925	0.311149
AGP50788	1.00807	0.309795
AGP50789	0.855658	0.205273
AGP50790	0.775245	0.332972
AGP50791	0.766878	0.336977
AGP50792	0.504217	0.463795
AGP50793	0.738607	0.368132
AGP50794	0.722211	0.291292
AGP50795	0.241208	0.680113
AGP50796	0.550235	0.428417
AGP50797	0.291678	0.784622
AGP50798	0.144811	0.818833
AGP50799	-0.121491	0.76576
AGP50800	0.0796473	0.968545
AGP50801	-0.596265	0.101102
AGP50802	-0.0224445	0.982532
AGP50803	0.21011	0.907532
AGP50804	-0.54746	0.491392
AGP50805	-0.36005	0.673274
AGP50806	-0.656941	0.0860998
AGP50807	-0.339272	0.788497
AGP50808	0.00652891	0.996236
AGP50809	0.372995	0.655792
AGP50810	0.169244	0.888577
EPlHVUG00000039848	0	-
EPlHVUG00000039849	-0.0580646	0.961279
EPlHVUG00000039850	0.188536	0.811589
EPlHVUG00000039851	0.616902	0.424513
EPlHVUG00000039852	-0.123054	0.920142
EPlHVUG00000039853	-0.0139768	0.988794
EPlHVUG00000039855	0	-
EPlHVUG00000039856	0.159091	0.839223
EPlHVUG00000039857	-0.481811	0.743834
EPlHVUG00000039858	0	-
EPlHVUG00000039861	-0.0665651	0.962771
EPlHVUG00000039863	-0.198066	0.766063
EPlHVUG00000039864	-0.238662	0.763064
EPlHVUG00000039865	0	-
EPlHVUG00000039867	-0.058861	0.959924
EPlHVUG00000039869	0	-
EPlHVUG00000039870	0.0414026	0.971463
EPlHVUG00000039871	-0.157524	0.839741
EPlHVUG00000039873	-0.338421	0.794744
EPlHVUG00000039875	0.186667	0.839962
EPlHVUG00000039877	0	-
EPlHVUG00000039878	0	-
EPlHVUG00000039879	-0.11852	0.838326
EPlHVUG00000039880	-0.12029	0.908096
EPlHVUG00000039881	-1.00199	0.0970108
EPlHVUG00000039882	0	-
EPlHVUG00000039883	-1.28907	0.313365
EPlHVUG00000039888	-0.180764	0.889097
EPlHVUG00000039890	0.398526	0.674349
EPlHVUG00000039891	0.0767337	0.939008
EPlHVUG00000039893	-0.12029	0.908096
EPlHVUG00000039894	0	-
HORVU0Hr1G000020	0.135514	0.69411
HORVU0Hr1G000030	0.136602	0.691071
HORVU0Hr1G000050	-0.671884	0.193476
HORVU0Hr1G000080	-0.254609	0.445156
HORVU0Hr1G000100	-0.378385	0.449956
HORVU0Hr1G000120	0	-
HORVU0Hr1G000130	-0.182504	0.906367
HORVU0Hr1G000160	-0.24602	0.522874
HORVU0Hr1G000200	0.346938	0.455404
HORVU0Hr1G000230	0	-
HORVU0Hr1G000250	0.0593887	0.939372
HORVU0Hr1G000270	0.309655	0.491077
HORVU0Hr1G000280	0.292279	0.458994
HORVU0Hr1G000290	0	-
HORVU0Hr1G000300	0	-
HORVU0Hr1G000320	1.75942	0.0021562
HORVU0Hr1G000340	2.17701	0.0708354
HORVU0Hr1G000350	-0.357691	0.662047
HORVU0Hr1G000360	1.436	0.126857
HORVU0Hr1G000370	0.626789	0.244637
HORVU0Hr1G000390	0.60552	0.162397
HORVU0Hr1G000410	-0.0238659	0.934226
HORVU0Hr1G000420	-0.689051	0.420649
HORVU0Hr1G000430	-0.448647	0.62814
HORVU0Hr1G000450	-0.0123622	0.982532
HORVU0Hr1G000490	-0.360585	0.336306
HORVU0Hr1G000500	0	-
HORVU0Hr1G000510	-0.0894525	0.86144
HORVU0Hr1G000600	0.09656	0.614071
HORVU0Hr1G000620	3.01762	0.0034496
HORVU0Hr1G000630	-0.0175401	0.965131
HORVU0Hr1G000640	0	-
HORVU0Hr1G000650	2.44469	0.0170799
HORVU0Hr1G000660	0.89565	0.0101931
HORVU0Hr1G000670	2.21268	0.0119403
HORVU0Hr1G000710	-0.133812	0.559845
HORVU0Hr1G000720	0	-
HORVU0Hr1G000730	0	-
HORVU0Hr1G000740	0	-
HORVU0Hr1G000760	-2.93097	0.0908697
HORVU0Hr1G000780	0.146239	0.950448
HORVU0Hr1G000810	-1.69261	0.573041
HORVU0Hr1G000840	0.263112	0.826683
HORVU0Hr1G000850	-1.83123	0.197099
HORVU0Hr1G000890	1.98782	0.0258543
HORVU0Hr1G000900	1.07259	0.166727
HORVU0Hr1G000910	-1.59565	0.00702258
HORVU0Hr1G000930	-0.283394	0.0688211
HORVU0Hr1G000940	-0.0986215	0.805172
HORVU0Hr1G000950	-1.28075	0.0295808
HORVU0Hr1G000960	-0.525298	0.342316
HORVU0Hr1G000990	0.85087	0.34466
HORVU0Hr1G001040	0.151221	0.930531
HORVU0Hr1G001050	-0.381135	0.143275
HORVU0Hr1G001070	-0.053816	0.941075
HORVU0Hr1G001110	1.59886	0.0639604
HORVU0Hr1G001120	0.243268	0.614589
HORVU0Hr1G001140	0	-
HORVU0Hr1G001150	0	-
HORVU0Hr1G001160	-0.162002	0.814108
HORVU0Hr1G001170	-0.359659	0.369444
HORVU0Hr1G001180	-0.0471922	0.887367
HORVU0Hr1G001190	0.295934	0.6542
HORVU0Hr1G001200	0	-
HORVU0Hr1G001230	-0.569055	0.205273
HORVU0Hr1G001240	0.692165	0.0793361
HORVU0Hr1G001270	0.244157	0.545319
HORVU0Hr1G001280	0.0344125	0.969593
HORVU0Hr1G001300	-0.350801	0.181249
HORVU0Hr1G001340	-0.20996	0.453468
HORVU0Hr1G001350	0.0158554	0.974172
HORVU0Hr1G001370	0.0709951	0.886332
HORVU0Hr1G001390	0.16538	0.710835
HORVU0Hr1G001400	0.112314	0.63374
HORVU0Hr1G001420	-0.5249	0.378943
HORVU0Hr1G001430	0.20576	0.899355
HORVU0Hr1G001440	-0.375497	0.10686
HORVU0Hr1G001450	-0.0451414	0.918398
HORVU0Hr1G001460	0.44629	0.126746
HORVU0Hr1G001470	0	-
HORVU0Hr1G001480	3.91506	0.0305818
HORVU0Hr1G001490	-0.3851	0.455298
HORVU0Hr1G001500	-0.599828	0.105045
HORVU0Hr1G001510	-0.135511	0.70791
HORVU0Hr1G001520	0	-
HORVU0Hr1G001530	0.319106	0.434364
HORVU0Hr1G001570	-0.130775	0.590797
HORVU0Hr1G001580	-0.476191	0.409331
HORVU0Hr1G001600	1.46699	0.0124587
HORVU0Hr1G001610	0	-
HORVU0Hr1G001630	-0.118838	0.754226
HORVU0Hr1G001640	-0.231157	0.570107
HORVU0Hr1G001680	0.435683	0.689698
HORVU0Hr1G001690	0.417055	0.579902
HORVU0Hr1G001750	-0.131965	0.649349
HORVU0Hr1G001760	0.00502163	0.993129
HORVU0Hr1G001770	0	-
HORVU0Hr1G001780	0	-
HORVU0Hr1G001800	-3.45237	0.100805
HORVU0Hr1G001810	0	-
HORVU0Hr1G001820	0	-
HORVU0Hr1G001840	1.96808	0.0342199
HORVU0Hr1G001870	0	-
HORVU0Hr1G001880	0	-
HORVU0Hr1G001900	0	-
HORVU0Hr1G001920	0	-
HORVU0Hr1G001960	0	-
HORVU0Hr1G001980	0	-
HORVU0Hr1G002020	-0.0127404	0.991883
HORVU0Hr1G002030	0	-
HORVU0Hr1G002040	0	-
HORVU0Hr1G002060	0	-
HORVU0Hr1G002080	-0.202861	0.923981
HORVU0Hr1G002090	2.45931	0.0417507
HORVU0Hr1G002110	0.556297	0.604386
HORVU0Hr1G002120	2.22462	0.0444533
HORVU0Hr1G002220	0.0360242	0.898004
HORVU0Hr1G002250	0.197666	0.829098
HORVU0Hr1G002270	0	-
HORVU0Hr1G002290	0	-
HORVU0Hr1G002300	-0.243668	0.843927
HORVU0Hr1G002320	0	-
HORVU0Hr1G002340	0.174783	0.673883
HORVU0Hr1G002360	0	-
HORVU0Hr1G002390	3.33239	0.0246019
HORVU0Hr1G002410	2.94596	0.0322185
HORVU0Hr1G002450	0	-
HORVU0Hr1G002460	0	-
HORVU0Hr1G002480	-0.945188	0.167249
HORVU0Hr1G002500	-0.904352	0.143777
HORVU0Hr1G002520	-0.773654	0.1573
HORVU0Hr1G002530	-1.01649	0.155723
HORVU0Hr1G002580	3.24337	0.000788368
HORVU0Hr1G002600	-0.920905	0.0381294
HORVU0Hr1G002620	0	-
HORVU0Hr1G002630	0	-
HORVU0Hr1G002640	1.12697	0.391113
HORVU0Hr1G002680	-0.0287663	0.936101
HORVU0Hr1G002690	0.176067	0.814128
HORVU0Hr1G002710	0.20133	0.911605
HORVU0Hr1G002720	0.0350154	0.917199
HORVU0Hr1G002730	-0.0833874	0.784416
HORVU0Hr1G002760	0	-
HORVU0Hr1G002770	0	-
HORVU0Hr1G002800	0	-
HORVU0Hr1G002810	0	-
HORVU0Hr1G002840	0	-
HORVU0Hr1G002870	-0.387026	0.861016
HORVU0Hr1G002880	0	-
HORVU0Hr1G002920	-0.0096026	0.993407
HORVU0Hr1G002930	0.625548	0.525384
HORVU0Hr1G002940	0.672068	0.600007
HORVU0Hr1G002950	0.750228	0.183208
HORVU0Hr1G002960	-0.349353	0.343563
HORVU0Hr1G002990	0.627235	0.515288
HORVU0Hr1G003000	-1.06267	0.0102297
HORVU0Hr1G003010	0.317841	0.482121
HORVU0Hr1G003020	-0.366498	0.0736692
HORVU0Hr1G003030	0	-
HORVU0Hr1G003040	0.264733	0.268933
HORVU0Hr1G003080	-1.22066	0.398246
HORVU0Hr1G003110	1.67469	0.134377
HORVU0Hr1G003140	0	-
HORVU0Hr1G003170	0	-
HORVU0Hr1G003180	0	-
HORVU0Hr1G003190	-1.21874	0.0917177
HORVU0Hr1G003200	-0.106988	0.852016
HORVU0Hr1G003210	0.47606	0.340592
HORVU0Hr1G003220	-0.324345	0.769258
HORVU0Hr1G003230	0.0810445	0.894488
HORVU0Hr1G003260	0.443914	0.3293
HORVU0Hr1G003270	-0.290266	0.592377
HORVU0Hr1G003280	-0.194785	0.913877
HORVU0Hr1G003300	0	-
HORVU0Hr1G003320	-0.183714	0.835534
HORVU0Hr1G003330	-0.385012	0.385507
HORVU0Hr1G003340	-0.516334	0.371935
HORVU0Hr1G003380	-0.0919704	0.700893
HORVU0Hr1G003440	-0.144744	0.826398
HORVU0Hr1G003480	-0.359806	0.869485
HORVU0Hr1G003490	0.0342359	0.928586
HORVU0Hr1G003520	0	-
HORVU0Hr1G003540	0.2304	0.298187
HORVU0Hr1G003660	0.367566	0.63064
HORVU0Hr1G003700	0	-
HORVU0Hr1G003720	0.382947	0.788997
HORVU0Hr1G003770	0	-
HORVU0Hr1G003790	0	-
HORVU0Hr1G003810	0.209361	0.8142
HORVU0Hr1G003840	0	-
HORVU0Hr1G003850	-0.857459	0.266041
HORVU0Hr1G003870	-0.361869	0.330048
HORVU0Hr1G003880	0	-
HORVU0Hr1G003890	-0.0731356	0.948921
HORVU0Hr1G003900	1.35008	0.0898833
HORVU0Hr1G003910	0.103144	0.879257
HORVU0Hr1G003920	5.22718	0.00179591
HORVU0Hr1G003930	3.23995	0.00685009
HORVU0Hr1G003950	-0.386557	0.667859
HORVU0Hr1G003980	-0.5379	0.631893
HORVU0Hr1G004040	0.925198	0.112836
HORVU0Hr1G004060	0.697126	0.229518
HORVU0Hr1G004120	-0.284275	0.330943
HORVU0Hr1G004130	-0.219717	0.491077
HORVU0Hr1G004140	0	-
HORVU0Hr1G004150	0.499205	0.167846
HORVU0Hr1G004160	-0.069861	0.887596
HORVU0Hr1G004200	0.152396	0.639245
HORVU0Hr1G004250	0	-
HORVU0Hr1G004270	-0.197356	0.638996
HORVU0Hr1G004300	-0.336319	0.657483
HORVU0Hr1G004320	0.0763524	0.934692
HORVU0Hr1G004330	-0.000186725	0.999846
HORVU0Hr1G004350	-0.191686	0.623464
HORVU0Hr1G004380	0	-
HORVU0Hr1G004400	0.0171915	0.970723
HORVU0Hr1G004410	3.72826	0.00787676
HORVU0Hr1G004420	0.0327517	0.924664
HORVU0Hr1G004430	-0.101812	0.693198
HORVU0Hr1G004470	0.681392	0.148377
HORVU0Hr1G004480	0.73122	0.0619755
HORVU0Hr1G004510	-0.317406	0.680076
HORVU0Hr1G004530	0	-
HORVU0Hr1G004610	0	-
HORVU0Hr1G004630	0	-
HORVU0Hr1G004640	0	-
HORVU0Hr1G004650	3.33495	0.0541572
HORVU0Hr1G004670	2.6207	0.0246174
HORVU0Hr1G004680	0	-
HORVU0Hr1G004690	0.840822	0.20401
HORVU0Hr1G004700	-0.206934	0.691664
HORVU0Hr1G004730	0.291711	0.793546
HORVU0Hr1G004740	0.250138	0.824538
HORVU0Hr1G004750	0	-
HORVU0Hr1G004790	0.0880641	0.812142
HORVU0Hr1G004800	0.743049	0.190676
HORVU0Hr1G004830	-0.0744431	0.939008
HORVU0Hr1G004850	0.480584	0.532724
HORVU0Hr1G004870	0.438045	0.360455
HORVU0Hr1G004890	0.98041	0.343831
HORVU0Hr1G004900	0	-
HORVU0Hr1G004910	0.668853	0.551364
HORVU0Hr1G004960	-0.0397561	0.903516
HORVU0Hr1G004970	0.0477309	0.835037
HORVU0Hr1G004980	0.43171	0.472742
HORVU0Hr1G004990	0.195958	0.658764
HORVU0Hr1G005000	-0.178869	0.706361
HORVU0Hr1G005010	0	-
HORVU0Hr1G005020	-0.233716	0.6001
HORVU0Hr1G005050	1.8501	0.0277675
HORVU0Hr1G005060	6.59063	0.000552386
HORVU0Hr1G005070	-0.421325	0.368249
HORVU0Hr1G005090	0	-
HORVU0Hr1G005100	-0.324954	0.772771
HORVU0Hr1G005120	0	-
HORVU0Hr1G005130	0	-
HORVU0Hr1G005140	-0.364003	0.518645
HORVU0Hr1G005150	1.41262	0.0839201
HORVU0Hr1G005160	0.213394	0.843762
HORVU0Hr1G005180	0	-
HORVU0Hr1G005200	0	-
HORVU0Hr1G005210	1.18663	0.351706
HORVU0Hr1G005230	0.241001	0.765913
HORVU0Hr1G005240	-1.25846	0.0637993
HORVU0Hr1G005250	0	-
HORVU0Hr1G005260	1.10871	0.0391648
HORVU0Hr1G005290	0.291223	0.47899
HORVU0Hr1G005300	-1.58422	0.422523
HORVU0Hr1G005320	2.76222	0.00117754
HORVU0Hr1G005330	0.000194745	0.99992
HORVU0Hr1G005350	2.45449	0.0535253
HORVU0Hr1G005360	0.856857	0.597292
HORVU0Hr1G005380	0.631392	0.289586
HORVU0Hr1G005400	1.23886	0.155686
HORVU0Hr1G005410	0	-
HORVU0Hr1G005420	1.45727	0.139259
HORVU0Hr1G005430	0.717467	0.385121
HORVU0Hr1G005480	0	-
HORVU0Hr1G005490	0	-
HORVU0Hr1G005500	-0.15628	0.822192
HORVU0Hr1G005510	-0.236569	0.669833
HORVU0Hr1G005520	-0.212711	0.687723
HORVU0Hr1G005540	0.474557	0.708372
HORVU0Hr1G005550	0.54636	0.69047
HORVU0Hr1G005560	0	-
HORVU0Hr1G005570	-0.226441	0.450615
HORVU0Hr1G005590	0	-
HORVU0Hr1G005600	0	-
HORVU0Hr1G005610	0	-
HORVU0Hr1G005620	0	-
HORVU0Hr1G005640	0	-
HORVU0Hr1G005660	0	-
HORVU0Hr1G005670	-0.608819	0.149157
HORVU0Hr1G005680	0	-
HORVU0Hr1G005690	0	-
HORVU0Hr1G005700	0	-
HORVU0Hr1G005720	-0.151411	0.660945
HORVU0Hr1G005730	0	-
HORVU0Hr1G005750	-0.889415	0.0554249
HORVU0Hr1G005770	-0.176069	0.655903
HORVU0Hr1G005790	-0.113038	0.716705
HORVU0Hr1G005820	-0.144426	0.723607
HORVU0Hr1G005840	0.305907	0.481
HORVU0Hr1G005850	0.551339	0.450461
HORVU0Hr1G005860	0.901183	0.22951
HORVU0Hr1G005870	0.38688	0.686542
HORVU0Hr1G005890	-0.315538	0.586583
HORVU0Hr1G005900	-0.381559	0.497034
HORVU0Hr1G005910	-0.560364	0.490585
HORVU0Hr1G005920	-0.134609	0.61205
HORVU0Hr1G005960	0.365292	0.180172
HORVU0Hr1G005970	0	-
HORVU0Hr1G006020	0.121969	0.796782
HORVU0Hr1G006040	-0.00334418	0.996236
HORVU0Hr1G006050	-0.940939	0.149212
HORVU0Hr1G006070	-0.731438	0.110367
HORVU0Hr1G006080	-0.773677	0.0775071
HORVU0Hr1G006090	0	-
HORVU0Hr1G006100	0	-
HORVU0Hr1G006120	0	-
HORVU0Hr1G006130	0	-
HORVU0Hr1G006140	-0.713	0.564622
HORVU0Hr1G006150	-0.559127	0.597488
HORVU0Hr1G006160	-0.713002	0.570701
HORVU0Hr1G006170	-0.842321	0.722657
HORVU0Hr1G006190	-0.6051	0.0605453
HORVU0Hr1G006210	0	-
HORVU0Hr1G006240	0.639353	0.0915321
HORVU0Hr1G006250	0.197699	0.636618
HORVU0Hr1G006260	0	-
HORVU0Hr1G006270	0	-
HORVU0Hr1G006280	0	-
HORVU0Hr1G006290	0.49787	0.781933
HORVU0Hr1G006300	0	-
HORVU0Hr1G006330	0	-
HORVU0Hr1G006340	0	-
HORVU0Hr1G006350	-0.696469	0.11069
HORVU0Hr1G006360	-0.140745	0.855684
HORVU0Hr1G006370	0	-
HORVU0Hr1G006380	0	-
HORVU0Hr1G006410	0.368604	0.561341
HORVU0Hr1G006420	1.93409	0.0171668
HORVU0Hr1G006430	2.00938	0.011677
HORVU0Hr1G006440	-0.483431	0.166396
HORVU0Hr1G006450	0	-
HORVU0Hr1G006460	-0.527792	0.154498
HORVU0Hr1G006470	0	-
HORVU0Hr1G006520	0.0492699	0.985589
HORVU0Hr1G006550	0	-
HORVU0Hr1G006560	0	-
HORVU0Hr1G006580	0	-
HORVU0Hr1G006600	-0.697109	0.592341
HORVU0Hr1G006620	0.286217	0.88771
HORVU0Hr1G006630	0.401508	0.154912
HORVU0Hr1G006640	0.116307	0.764636
HORVU0Hr1G006680	0.297399	0.506767
HORVU0Hr1G006720	-0.408218	0.315242
HORVU0Hr1G006740	-0.474616	0.0847036
HORVU0Hr1G006750	0.390846	0.337223
HORVU0Hr1G006770	0	-
HORVU0Hr1G006790	-0.597637	0.137427
HORVU0Hr1G006800	1.86366	0.000677666
HORVU0Hr1G006810	0	-
HORVU0Hr1G006830	-1.00996	0.173544
HORVU0Hr1G006890	0.814617	0.470677
HORVU0Hr1G006920	0	-
HORVU0Hr1G006930	0.0680794	0.889665
HORVU0Hr1G006940	0.543012	0.650595
HORVU0Hr1G006950	0.104049	0.67737
HORVU0Hr1G006960	-0.23944	0.221096
HORVU0Hr1G006980	-0.0864953	0.961463
HORVU0Hr1G007000	0.0099712	0.982381
HORVU0Hr1G007020	0.24355	0.855684
HORVU0Hr1G007030	1.0594	0.118662
HORVU0Hr1G007050	1.75343	0.0365188
HORVU0Hr1G007070	-0.554536	0.0535082
HORVU0Hr1G007090	0	-
HORVU0Hr1G007100	0	-
HORVU0Hr1G007110	0.200144	0.377582
HORVU0Hr1G007130	0.574006	0.681566
HORVU0Hr1G007150	-0.121494	0.72281
HORVU0Hr1G007170	0	-
HORVU0Hr1G007190	0	-
HORVU0Hr1G007210	0	-
HORVU0Hr1G007220	-0.0157813	0.982532
HORVU0Hr1G007240	0	-
HORVU0Hr1G007260	0	-
HORVU0Hr1G007280	0	-
HORVU0Hr1G007320	-0.146099	0.690927
HORVU0Hr1G007330	0	-
HORVU0Hr1G007340	-3.13516	0.232127
HORVU0Hr1G007360	-0.31542	0.557177
HORVU0Hr1G007370	-0.0816003	0.97673
HORVU0Hr1G007380	-0.0792941	0.889097
HORVU0Hr1G007410	-0.483718	0.160804
HORVU0Hr1G007420	-0.257888	0.607706
HORVU0Hr1G007430	0	-
HORVU0Hr1G007450	1.26256	0.282889
HORVU0Hr1G007460	0.339934	0.41276
HORVU0Hr1G007470	-0.757604	0.774025
HORVU0Hr1G007480	-2.29052	0.0593726
HORVU0Hr1G007520	0	-
HORVU0Hr1G007540	-0.139215	0.863923
HORVU0Hr1G007580	0	-
HORVU0Hr1G007620	-0.200208	0.884108
HORVU0Hr1G007630	0.197919	0.805172
HORVU0Hr1G007640	0	-
HORVU0Hr1G007650	0.077413	0.876636
HORVU0Hr1G007680	-0.227062	0.730834
HORVU0Hr1G007690	-0.227632	0.730285
HORVU0Hr1G007700	-0.446086	0.115011
HORVU0Hr1G007720	0	-
HORVU0Hr1G007730	0	-
HORVU0Hr1G007740	0.192109	0.890134
HORVU0Hr1G007760	0.46817	0.621215
HORVU0Hr1G007770	0.118084	0.892352
HORVU0Hr1G007790	-0.641374	0.105973
HORVU0Hr1G007820	-0.545283	0.0808639
HORVU0Hr1G007830	-0.431664	0.602778
HORVU0Hr1G007860	0.0601161	0.919323
HORVU0Hr1G007870	0	-
HORVU0Hr1G007880	-0.710322	0.0982976
HORVU0Hr1G007890	-0.282834	0.406305
HORVU0Hr1G007930	0.0662864	0.891303
HORVU0Hr1G007960	-0.28282	0.710194
HORVU0Hr1G008030	0.309738	0.659117
HORVU0Hr1G008040	-0.365031	0.606068
HORVU0Hr1G008050	1.28129	0.298187
HORVU0Hr1G008060	-0.712009	0.0291969
HORVU0Hr1G008070	-0.709826	0.0255644
HORVU0Hr1G008080	-0.704874	0.0369318
HORVU0Hr1G008280	0.265809	0.388656
HORVU0Hr1G008350	0	-
HORVU0Hr1G008360	-0.555168	0.0741079
HORVU0Hr1G008370	0	-
HORVU0Hr1G008390	0	-
HORVU0Hr1G008400	0	-
HORVU0Hr1G008470	0.379872	0.153244
HORVU0Hr1G008550	-0.0807651	0.784516
HORVU0Hr1G008580	-1.54245	0.04292
HORVU0Hr1G008590	-0.343705	0.232261
HORVU0Hr1G008610	0	-
HORVU0Hr1G008620	0.360478	0.225021
HORVU0Hr1G008640	-0.719762	0.0776107
HORVU0Hr1G008650	0.433008	0.329914
HORVU0Hr1G008670	0.394365	0.424851
HORVU0Hr1G008690	-0.00265879	0.997236
HORVU0Hr1G008700	0.124195	0.734054
HORVU0Hr1G008740	0.369256	0.445582
HORVU0Hr1G008750	0.169837	0.817612
HORVU0Hr1G008780	1.97354	0.0053499
HORVU0Hr1G008790	0.778586	0.0367639
HORVU0Hr1G008800	0.169837	0.817612
HORVU0Hr1G008810	-0.396784	0.273407
HORVU0Hr1G008830	0.935314	0.617433
HORVU0Hr1G008840	-0.243545	0.677516
HORVU0Hr1G008850	0.416226	0.573965
HORVU0Hr1G008860	0.0861782	0.792282
HORVU0Hr1G008870	0.135545	0.74332
HORVU0Hr1G008880	0.0694372	0.784516
HORVU0Hr1G008920	-0.288173	0.666037
HORVU0Hr1G008940	0.400302	0.273435
HORVU0Hr1G008950	-1.27656	0.35295
HORVU0Hr1G008960	1.53609	0.764576
HORVU0Hr1G008970	0.0628061	0.827574
HORVU0Hr1G008980	0.370871	0.32309
HORVU0Hr1G008990	-0.704846	0.321954
HORVU0Hr1G009030	-0.0656721	0.906994
HORVU0Hr1G009040	-0.202148	0.686139
HORVU0Hr1G009050	-0.402109	0.424696
HORVU0Hr1G009060	0.292692	0.79959
HORVU0Hr1G009070	0.219081	0.897813
HORVU0Hr1G009080	-0.388135	0.120611
HORVU0Hr1G009100	0	-
HORVU0Hr1G009120	2.92353	0.00658465
HORVU0Hr1G009140	0.848251	0.0321088
HORVU0Hr1G009150	0.83978	0.0332108
HORVU0Hr1G009170	-0.341299	0.316616
HORVU0Hr1G009180	0	-
HORVU0Hr1G009230	0	-
HORVU0Hr1G009250	0	-
HORVU0Hr1G009270	0	-
HORVU0Hr1G009280	-1.02474	0.187906
HORVU0Hr1G009310	0	-
HORVU0Hr1G009320	0.0650073	0.977481
HORVU0Hr1G009330	0	-
HORVU0Hr1G009340	0.0650073	0.977481
HORVU0Hr1G009350	0.0650073	0.977481
HORVU0Hr1G009370	-0.0807192	0.965364
HORVU0Hr1G009380	-0.365454	0.375032
HORVU0Hr1G009390	-0.978074	0.669384
HORVU0Hr1G009400	-0.914006	0.578831
HORVU0Hr1G009410	0.768296	0.740098
HORVU0Hr1G009420	-1.41223	0.36823
HORVU0Hr1G009440	-1.20239	0.522432
HORVU0Hr1G009450	-0.979285	0.667907
HORVU0Hr1G009460	-0.486916	0.564161
HORVU0Hr1G009470	-1.14543	0.580372
HORVU0Hr1G009480	-0.42722	0.660945
HORVU0Hr1G009530	-0.219359	0.820352
HORVU0Hr1G009540	0	-
HORVU0Hr1G009550	0.111465	0.695499
HORVU0Hr1G009560	-0.368017	0.289739
HORVU0Hr1G009600	0	-
HORVU0Hr1G009680	0.0399931	0.974571
HORVU0Hr1G009740	0.821678	0.343563
HORVU0Hr1G009770	-0.261128	0.659896
HORVU0Hr1G009780	0.0153758	0.9873
HORVU0Hr1G009800	0	-
HORVU0Hr1G009840	0	-
HORVU0Hr1G009850	1.43977	0.0132029
HORVU0Hr1G009860	2.62881	0.014714
HORVU0Hr1G009870	-0.265712	0.325796
HORVU0Hr1G009880	0	-
HORVU0Hr1G009900	2.88974	0.112218
HORVU0Hr1G009910	-0.160359	0.513787
HORVU0Hr1G009930	-0.344893	0.724688
HORVU0Hr1G009960	0	-
HORVU0Hr1G009970	0	-
HORVU0Hr1G010000	0.0571924	0.93742
HORVU0Hr1G010010	0.0721525	0.967228
HORVU0Hr1G010020	-0.137692	0.744134
HORVU0Hr1G010040	0.442229	0.551997
HORVU0Hr1G010050	0.18542	0.803375
HORVU0Hr1G010070	0	-
HORVU0Hr1G010080	0.73271	0.700158
HORVU0Hr1G010120	0	-
HORVU0Hr1G010160	1.25088	0.282825
HORVU0Hr1G010170	0.0677758	0.870909
HORVU0Hr1G010180	0	-
HORVU0Hr1G010190	-0.291737	0.883859
HORVU0Hr1G010200	1.62055	0.147932
HORVU0Hr1G010210	0	-
HORVU0Hr1G010220	0.314456	0.530121
HORVU0Hr1G010230	0.143786	0.742601
HORVU0Hr1G010240	0	-
HORVU0Hr1G010250	1.21226	0.0154084
HORVU0Hr1G010260	0.0225616	0.951168
HORVU0Hr1G010280	0.505771	0.657132
HORVU0Hr1G010310	0	-
HORVU0Hr1G010330	0	-
HORVU0Hr1G010340	1.12512	0.103124
HORVU0Hr1G010350	-0.218465	0.80078
HORVU0Hr1G010360	0	-
HORVU0Hr1G010370	0	-
HORVU0Hr1G010390	0	-
HORVU0Hr1G010400	0	-
HORVU0Hr1G010410	0	-
HORVU0Hr1G010440	0	-
HORVU0Hr1G010460	1.15376	0.401491
HORVU0Hr1G010470	0	-
HORVU0Hr1G010480	0	-
HORVU0Hr1G010490	0.285578	0.599686
HORVU0Hr1G010510	0.111218	0.819581
HORVU0Hr1G010530	0.154739	0.735552
HORVU0Hr1G010590	-0.046872	0.947002
HORVU0Hr1G010600	0	-
HORVU0Hr1G010630	0.0646817	0.860382
HORVU0Hr1G010640	1.12195	0.181887
HORVU0Hr1G010660	-0.534744	0.362398
HORVU0Hr1G010680	0.106311	0.915142
HORVU0Hr1G010690	0	-
HORVU0Hr1G010700	0	-
HORVU0Hr1G010710	0	-
HORVU0Hr1G010750	0.154449	0.582744
HORVU0Hr1G010760	1.4137	0.219205
HORVU0Hr1G010770	-0.805989	0.0872939
HORVU0Hr1G010790	-0.129367	0.643605
HORVU0Hr1G010800	-0.0212641	0.969867
HORVU0Hr1G010810	-0.960289	0.123263
HORVU0Hr1G010840	-0.0618513	0.931438
HORVU0Hr1G010870	0.245673	0.28053
HORVU0Hr1G010880	-2.86343	0.0571156
HORVU0Hr1G010890	0.245933	0.56466
HORVU0Hr1G010900	0.0816203	0.890817
HORVU0Hr1G010910	-0.155567	0.864889
HORVU0Hr1G010920	0.341855	0.477579
HORVU0Hr1G010940	0.117919	0.892641
HORVU0Hr1G010970	0.533969	0.763427
HORVU0Hr1G010990	0	-
HORVU0Hr1G011010	0	-
HORVU0Hr1G011030	1.7679	0.00216347
HORVU0Hr1G011040	0.266915	0.893459
HORVU0Hr1G011050	0.331257	0.838119
HORVU0Hr1G011110	-0.218212	0.846926
HORVU0Hr1G011140	0.203394	0.834585
HORVU0Hr1G011150	-0.124017	0.920142
HORVU0Hr1G011280	0	-
HORVU0Hr1G011310	0.170348	0.455527
HORVU0Hr1G011320	0	-
HORVU0Hr1G011330	0.110878	0.809538
HORVU0Hr1G011420	-0.291989	0.685858
HORVU0Hr1G011430	-0.229963	0.754131
HORVU0Hr1G011440	0	-
HORVU0Hr1G011450	4.50714	0.0757499
HORVU0Hr1G011460	-0.39927	0.248909
HORVU0Hr1G011480	0.638914	0.569099
HORVU0Hr1G011500	0	-
HORVU0Hr1G011510	0.118853	0.899744
HORVU0Hr1G011520	-1.03936	0.434564
HORVU0Hr1G011560	-0.0698503	0.778241
HORVU0Hr1G011570	-0.872194	0.0335153
HORVU0Hr1G011580	0	-
HORVU0Hr1G011600	-0.0384084	0.966588
HORVU0Hr1G011610	0	-
HORVU0Hr1G011620	0	-
HORVU0Hr1G011630	0	-
HORVU0Hr1G011650	0.0163546	0.988295
HORVU0Hr1G011660	0.0162743	0.993276
HORVU0Hr1G011670	0	-
HORVU0Hr1G011700	0	-
HORVU0Hr1G011720	-0.132545	0.949983
HORVU0Hr1G011730	0	-
HORVU0Hr1G011750	-0.175573	0.739857
HORVU0Hr1G011760	0.0271393	0.974172
HORVU0Hr1G011770	0	-
HORVU0Hr1G011840	-0.0585967	0.887455
HORVU0Hr1G011860	-0.761506	0.0328672
HORVU0Hr1G011890	0	-
HORVU0Hr1G011940	0.17347	0.65359
HORVU0Hr1G012050	-0.0181584	0.979932
HORVU0Hr1G012080	0	-
HORVU0Hr1G012090	0.286268	0.585627
HORVU0Hr1G012100	0	-
HORVU0Hr1G012130	-0.170289	0.886972
HORVU0Hr1G012140	0.521729	0.389307
HORVU0Hr1G012160	0	-
HORVU0Hr1G012190	0.392129	0.425802
HORVU0Hr1G012220	0	-
HORVU0Hr1G012230	1.25278	0.0629728
HORVU0Hr1G012260	-0.149172	0.639245
HORVU0Hr1G012300	-0.305999	0.740949
HORVU0Hr1G012350	0	-
HORVU0Hr1G012370	-0.533469	0.131797
HORVU0Hr1G012390	6.20646	0.00288588
HORVU0Hr1G012410	-0.0916121	0.78614
HORVU0Hr1G012460	-0.820427	0.0648953
HORVU0Hr1G012490	-0.228254	0.727373
HORVU0Hr1G012510	0.00529989	0.991589
HORVU0Hr1G012520	-0.365108	0.25052
HORVU0Hr1G012530	0	-
HORVU0Hr1G012560	0	-
HORVU0Hr1G012570	0	-
HORVU0Hr1G012620	-0.208653	0.358556
HORVU0Hr1G012630	-0.11672	0.808929
HORVU0Hr1G012670	0	-
HORVU0Hr1G012680	0	-
HORVU0Hr1G012710	1.14728	0.0653547
HORVU0Hr1G012740	1.09491	0.318444
HORVU0Hr1G012750	0.818481	0.489355
HORVU0Hr1G012780	0	-
HORVU0Hr1G012790	0	-
HORVU0Hr1G012820	-1.12621	0.194455
HORVU0Hr1G012850	0	-
HORVU0Hr1G012860	-0.368842	0.373759
HORVU0Hr1G012870	0.211781	0.834555
HORVU0Hr1G012890	-0.117709	0.764868
HORVU0Hr1G012910	2.90953	0.0179626
HORVU0Hr1G012920	1.75264	0.0295404
HORVU0Hr1G012930	0.0356997	0.982532
HORVU0Hr1G012940	-0.41424	0.747795
HORVU0Hr1G012950	-0.0772586	0.889431
HORVU0Hr1G012970	0.326005	0.680261
HORVU0Hr1G012990	4.58708	0.00425078
HORVU0Hr1G013010	0.523159	0.592759
HORVU0Hr1G013020	0.642224	0.452691
HORVU0Hr1G013030	0	-
HORVU0Hr1G013040	-0.553909	0.0965565
HORVU0Hr1G013060	1.00489	0.224574
HORVU0Hr1G013070	0.730677	0.435585
HORVU0Hr1G013080	0	-
HORVU0Hr1G013090	-0.345575	0.48397
HORVU0Hr1G013110	0	-
HORVU0Hr1G013120	-0.396202	0.640322
HORVU0Hr1G013140	-0.584685	0.388656
HORVU0Hr1G013160	0.544765	0.221025
HORVU0Hr1G013170	-0.663281	0.351427
HORVU0Hr1G013180	-1.06507	0.0440309
HORVU0Hr1G013190	0.915182	0.131387
HORVU0Hr1G013200	0.433165	0.298595
HORVU0Hr1G013220	0.370388	0.21866
HORVU0Hr1G013240	-0.74952	0.104279
HORVU0Hr1G013250	0	-
HORVU0Hr1G013260	-0.138374	0.905743
HORVU0Hr1G013280	0	-
HORVU0Hr1G013290	0.0267875	0.960193
HORVU0Hr1G013310	0	-
HORVU0Hr1G013340	-0.784795	0.0408812
HORVU0Hr1G013350	0.465474	0.533833
HORVU0Hr1G013380	0.471726	0.405676
HORVU0Hr1G013390	0.880473	0.0162689
HORVU0Hr1G013430	0.00763941	0.995736
HORVU0Hr1G013450	0	-
HORVU0Hr1G013460	0.120988	0.884831
HORVU0Hr1G013470	0	-
HORVU0Hr1G013490	0	-
HORVU0Hr1G013510	0.319653	0.31108
HORVU0Hr1G013610	0	-
HORVU0Hr1G013660	0.194858	0.794744
HORVU0Hr1G013680	0.317488	0.629366
HORVU0Hr1G013700	-0.209403	0.737308
HORVU0Hr1G013720	-4.92856	0.0522268
HORVU0Hr1G013740	-0.168155	0.893517
HORVU0Hr1G013750	1.32112	0.00810788
HORVU0Hr1G013760	1.30152	0.154976
HORVU0Hr1G013770	0.0487599	0.933584
HORVU0Hr1G013780	0.615307	0.417414
HORVU0Hr1G013800	-1.75979	0.0137755
HORVU0Hr1G013830	-0.323586	0.385387
HORVU0Hr1G013850	-0.0914945	0.755576
HORVU0Hr1G013870	-0.575183	0.183448
HORVU0Hr1G013890	-0.382491	0.34813
HORVU0Hr1G013900	-0.760213	0.0676998
HORVU0Hr1G013910	-0.657502	0.389594
HORVU0Hr1G013920	0	-
HORVU0Hr1G013930	0	-
HORVU0Hr1G013940	0	-
HORVU0Hr1G013950	0	-
HORVU0Hr1G013960	0	-
HORVU0Hr1G014000	0	-
HORVU0Hr1G014020	0	-
HORVU0Hr1G014030	1.42852	0.013237
HORVU0Hr1G014040	2.62881	0.014714
HORVU0Hr1G014050	-0.185919	0.511988
HORVU0Hr1G014060	0.0153764	0.987281
HORVU0Hr1G014070	-0.386982	0.104697
HORVU0Hr1G014080	0	-
HORVU0Hr1G014100	0.687688	0.614503
HORVU0Hr1G014110	0.60207	0.26214
HORVU0Hr1G014120	0	-
HORVU0Hr1G014140	0	-
HORVU0Hr1G014150	0.745227	0.0247635
HORVU0Hr1G014170	0.00660253	0.993562
HORVU0Hr1G014190	0	-
HORVU0Hr1G014200	-0.747462	0.237718
HORVU0Hr1G014210	-0.471396	0.0362502
HORVU0Hr1G014220	-0.51931	0.0189177
HORVU0Hr1G014230	0	-
HORVU0Hr1G014240	-0.442618	0.0530239
HORVU0Hr1G014250	-0.556607	0.606594
HORVU0Hr1G014260	0	-
HORVU0Hr1G014270	-0.160679	0.724622
HORVU0Hr1G014280	0	-
HORVU0Hr1G014290	0	-
HORVU0Hr1G014300	0	-
HORVU0Hr1G014360	-0.277981	0.868312
HORVU0Hr1G014370	0	-
HORVU0Hr1G014390	0	-
HORVU0Hr1G014400	1.24713	0.0760111
HORVU0Hr1G014450	0.722531	0.622259
HORVU0Hr1G014460	0.033118	0.965536
HORVU0Hr1G014490	0	-
HORVU0Hr1G014500	0	-
HORVU0Hr1G014510	0.149496	0.869485
HORVU0Hr1G014520	0	-
HORVU0Hr1G014540	0	-
HORVU0Hr1G014570	0	-
HORVU0Hr1G014580	0	-
HORVU0Hr1G014620	0	-
HORVU0Hr1G014630	-0.378211	0.500342
HORVU0Hr1G014650	-1.37596	0.318668
HORVU0Hr1G014660	0	-
HORVU0Hr1G014720	1.97667	0.393903
HORVU0Hr1G014750	2.32696	0.382984
HORVU0Hr1G014760	0	-
HORVU0Hr1G014770	0	-
HORVU0Hr1G014780	-0.90013	0.0718175
HORVU0Hr1G014790	-0.257213	0.534479
HORVU0Hr1G014810	0.138901	0.897583
HORVU0Hr1G014840	1.16729	0.0818429
HORVU0Hr1G014880	1.00798	0.227279
HORVU0Hr1G014900	2.15282	0.00283774
HORVU0Hr1G014940	-0.416253	0.270213
HORVU0Hr1G014950	-0.272052	0.764868
HORVU0Hr1G014960	-0.205207	0.565706
HORVU0Hr1G014980	0	-
HORVU0Hr1G015030	-0.612932	0.166245
HORVU0Hr1G015050	-0.101553	0.751879
HORVU0Hr1G015090	0.335878	0.639245
HORVU0Hr1G015130	0	-
HORVU0Hr1G015160	-0.870954	0.0683278
HORVU0Hr1G015180	0.74262	0.193438
HORVU0Hr1G015190	0	-
HORVU0Hr1G015210	0	-
HORVU0Hr1G015220	0.266888	0.639138
HORVU0Hr1G015230	-0.0188343	0.974625
HORVU0Hr1G015260	-0.731975	0.113327
HORVU0Hr1G015270	0	-
HORVU0Hr1G015280	0	-
HORVU0Hr1G015290	0	-
HORVU0Hr1G015300	0	-
HORVU0Hr1G015360	0	-
HORVU0Hr1G015370	4.49122	0.00942172
HORVU0Hr1G015380	-0.110847	0.756363
HORVU0Hr1G015390	1.8196	0.015769
HORVU0Hr1G015410	0.300509	0.833033
HORVU0Hr1G015420	-0.344945	0.682015
HORVU0Hr1G015440	-0.476013	0.487836
HORVU0Hr1G015450	-0.104143	0.673274
HORVU0Hr1G015470	0	-
HORVU0Hr1G015500	0	-
HORVU0Hr1G015510	-0.412901	0.529928
HORVU0Hr1G015520	-0.75893	0.0571126
HORVU0Hr1G015530	0.156403	0.820722
HORVU0Hr1G015560	0.412213	0.301985
HORVU0Hr1G015570	-0.495139	0.678105
HORVU0Hr1G015590	0	-
HORVU0Hr1G015600	0	-
HORVU0Hr1G015630	-0.616843	0.17536
HORVU0Hr1G015650	2.61179	0.00360675
HORVU0Hr1G015660	0	-
HORVU0Hr1G015680	-0.755691	0.619241
HORVU0Hr1G015700	0.104487	0.755626
HORVU0Hr1G015710	0.0495807	0.8891
HORVU0Hr1G015750	-0.314606	0.232525
HORVU0Hr1G015760	0	-
HORVU0Hr1G015770	0.0455696	0.870488
HORVU0Hr1G015780	4.13425	0.000768934
HORVU0Hr1G015810	0.50764	0.182784
HORVU0Hr1G015820	0.460987	0.349455
HORVU0Hr1G015830	0.215894	0.45167
HORVU0Hr1G015840	0.412715	0.536856
HORVU0Hr1G015850	0	-
HORVU0Hr1G015860	0.106416	0.939007
HORVU0Hr1G015890	-0.253351	0.628217
HORVU0Hr1G015910	0	-
HORVU0Hr1G015930	3.3661	0.00121272
HORVU0Hr1G015950	-1.01579	0.0381294
HORVU0Hr1G015960	0.307626	0.354894
HORVU0Hr1G015970	-0.567298	0.37715
HORVU0Hr1G015980	0	-
HORVU0Hr1G015990	-0.188092	0.810545
HORVU0Hr1G016000	0.236577	0.596013
HORVU0Hr1G016020	0	-
HORVU0Hr1G016040	-2.60642	0.122051
HORVU0Hr1G016050	0.0444596	0.900343
HORVU0Hr1G016060	0	-
HORVU0Hr1G016130	0	-
HORVU0Hr1G016140	0	-
HORVU0Hr1G016150	-0.00296652	0.993595
HORVU0Hr1G016170	3.19598	0.00117754
HORVU0Hr1G016180	-0.304334	0.429822
HORVU0Hr1G016190	0.0938447	0.772392
HORVU0Hr1G016220	0	-
HORVU0Hr1G016230	0	-
HORVU0Hr1G016250	-0.0402405	0.947311
HORVU0Hr1G016310	0.0325967	0.988401
HORVU0Hr1G016330	1.72394	0.0798308
HORVU0Hr1G016340	-0.20884	0.54388
HORVU0Hr1G016350	-0.122991	0.950013
HORVU0Hr1G016360	-0.346493	0.219122
HORVU0Hr1G016370	3.7117	0.025825
HORVU0Hr1G016380	0	-
HORVU0Hr1G016410	5.43807	0.0191243
HORVU0Hr1G016420	0	-
HORVU0Hr1G016430	1.30289	0.0265505
HORVU0Hr1G016450	-0.305734	0.326528
HORVU0Hr1G016470	0	-
HORVU0Hr1G016480	2.16391	0.0652833
HORVU0Hr1G016510	0.0546886	0.949686
HORVU0Hr1G016530	0	-
HORVU0Hr1G016540	3.09766	0.224426
HORVU0Hr1G016560	-0.226692	0.448923
HORVU0Hr1G016570	0	-
HORVU0Hr1G016590	0.437646	0.521781
HORVU0Hr1G016610	0.135235	0.881262
HORVU0Hr1G016630	-0.356993	0.374553
HORVU0Hr1G016640	-0.333778	0.546924
HORVU0Hr1G016650	-0.312209	0.47037
HORVU0Hr1G016660	1.46558	0.000587235
HORVU0Hr1G016680	5.21677	0.000686867
HORVU0Hr1G016690	0	-
HORVU0Hr1G016700	0.425689	0.287359
HORVU0Hr1G016720	-0.483022	0.144778
HORVU0Hr1G016780	1.72894	0.0785709
HORVU0Hr1G016820	0.357591	0.31108
HORVU0Hr1G016830	0	-
HORVU0Hr1G016840	-0.208552	0.625921
HORVU0Hr1G016860	-0.455194	0.396175
HORVU0Hr1G016880	-0.0492698	0.905536
HORVU0Hr1G016890	0.771897	0.196518
HORVU0Hr1G016920	0.0895745	0.693049
HORVU0Hr1G016930	0.48066	0.051815
HORVU0Hr1G016940	-0.652237	0.154807
HORVU0Hr1G016950	0	-
HORVU0Hr1G016960	-0.0675545	0.786993
HORVU0Hr1G016970	0	-
HORVU0Hr1G016980	0	-
HORVU0Hr1G017000	-0.731835	0.59091
HORVU0Hr1G017010	0	-
HORVU0Hr1G017020	-0.0629959	0.805554
HORVU0Hr1G017050	0.190671	0.663793
HORVU0Hr1G017060	0	-
HORVU0Hr1G017070	0.209765	0.749764
HORVU0Hr1G017080	1.29778	0.0090483
HORVU0Hr1G017090	-0.783577	0.0401339
HORVU0Hr1G017100	0.0953568	0.787714
HORVU0Hr1G017110	5.86165	0.0121124
HORVU0Hr1G017120	0.11793	0.639852
HORVU0Hr1G017130	-1.01844	0.116503
HORVU0Hr1G017140	0.191917	0.637883
HORVU0Hr1G017160	2.65043	0.00090459
HORVU0Hr1G017170	-0.0510719	0.933992
HORVU0Hr1G017180	0.544703	0.499486
HORVU0Hr1G017200	0.216881	0.808618
HORVU0Hr1G017210	-0.329234	0.282889
HORVU0Hr1G017220	1.60472	0.167363
HORVU0Hr1G017230	-2.16125	0.0421011
HORVU0Hr1G017240	0	-
HORVU0Hr1G017250	0.252269	0.593693
HORVU0Hr1G017260	0.189336	0.613425
HORVU0Hr1G017270	0.00453619	0.996236
HORVU0Hr1G017280	0	-
HORVU0Hr1G017290	0	-
HORVU0Hr1G017320	-0.194789	0.733781
HORVU0Hr1G017330	0.997177	0.178584
HORVU0Hr1G017350	0	-
HORVU0Hr1G017360	0.0331387	0.943364
HORVU0Hr1G017370	-0.132179	0.704211
HORVU0Hr1G017380	-0.418316	0.522944
HORVU0Hr1G017400	0.114719	0.895871
HORVU0Hr1G017440	0.373	0.128242
HORVU0Hr1G017450	0.45333	0.0198329
HORVU0Hr1G017480	0.00115522	0.999064
HORVU0Hr1G017490	1.54634	0.150884
HORVU0Hr1G017510	-0.0525294	0.91239
HORVU0Hr1G017530	2.84542	0.00606907
HORVU0Hr1G017540	-0.122937	0.78747
HORVU0Hr1G017560	-0.66284	0.330468
HORVU0Hr1G017570	-0.684295	0.322657
HORVU0Hr1G017610	0	-
HORVU0Hr1G017620	-0.0494377	0.870488
HORVU0Hr1G017670	-1.18367	0.225948
HORVU0Hr1G017680	-0.424481	0.162201
HORVU0Hr1G017690	-0.934672	0.19023
HORVU0Hr1G017710	0	-
HORVU0Hr1G017720	0	-
HORVU0Hr1G017740	-0.618737	0.156938
HORVU0Hr1G017750	-0.563695	0.239012
HORVU0Hr1G017760	0	-
HORVU0Hr1G017790	0.166347	0.789584
HORVU0Hr1G017800	0.269566	0.438343
HORVU0Hr1G017830	0	-
HORVU0Hr1G017840	0	-
HORVU0Hr1G017850	0	-
HORVU0Hr1G017940	0.173989	0.800742
HORVU0Hr1G017950	0	-
HORVU0Hr1G017960	0.359938	0.530194
HORVU0Hr1G017970	-0.415806	0.285601
HORVU0Hr1G018000	0.179647	0.658254
HORVU0Hr1G018020	0	-
HORVU0Hr1G018030	0	-
HORVU0Hr1G018040	0	-
HORVU0Hr1G018050	-0.452566	0.522882
HORVU0Hr1G018060	-0.497719	0.224415
HORVU0Hr1G018090	0	-
HORVU0Hr1G018100	-0.163048	0.787167
HORVU0Hr1G018120	0.296172	0.403388
HORVU0Hr1G018140	-0.117893	0.700087
HORVU0Hr1G018160	0.30641	0.538457
HORVU0Hr1G018170	0.245111	0.766105
HORVU0Hr1G018180	-1.24227	0.375991
HORVU0Hr1G018190	-0.145963	0.953447
HORVU0Hr1G018200	0.0607937	0.818332
HORVU0Hr1G018210	-0.0407908	0.939542
HORVU0Hr1G018240	5.40459	0.0039603
HORVU0Hr1G018250	0	-
HORVU0Hr1G018260	0	-
HORVU0Hr1G018270	-4.2861	0.10136
HORVU0Hr1G018280	0	-
HORVU0Hr1G018290	3.48575	0.030711
HORVU0Hr1G018300	-0.268881	0.346955
HORVU0Hr1G018320	1.90779	0.0313641
HORVU0Hr1G018350	0.0876801	0.933469
HORVU0Hr1G018360	1.03568	0.0901904
HORVU0Hr1G018370	2.00198	0.00108746
HORVU0Hr1G018380	2.00198	0.00108746
HORVU0Hr1G018390	-0.766987	0.25005
HORVU0Hr1G018410	0	-
HORVU0Hr1G018430	0	-
HORVU0Hr1G018450	0	-
HORVU0Hr1G018470	0.273125	0.547655
HORVU0Hr1G018480	0.580758	0.313236
HORVU0Hr1G018510	0.0777674	0.789157
HORVU0Hr1G018520	0	-
HORVU0Hr1G018530	0	-
HORVU0Hr1G018560	0	-
HORVU0Hr1G018570	0	-
HORVU0Hr1G018590	11.1744	0.000264248
HORVU0Hr1G018670	0	-
HORVU0Hr1G018690	-0.288715	0.488941
HORVU0Hr1G018710	-0.0415384	0.972922
HORVU0Hr1G018730	0	-
HORVU0Hr1G018770	-0.354919	0.647389
HORVU0Hr1G018780	0	-
HORVU0Hr1G018800	0	-
HORVU0Hr1G018810	0	-
HORVU0Hr1G018820	0	-
HORVU0Hr1G018830	-0.377906	0.336306
HORVU0Hr1G018840	-0.708738	0.682091
HORVU0Hr1G018850	1.5688	0.304344
HORVU0Hr1G018890	0.619492	0.425161
HORVU0Hr1G018910	0	-
HORVU0Hr1G018940	0	-
HORVU0Hr1G018970	-0.305182	0.454266
HORVU0Hr1G018980	-0.304899	0.301899
HORVU0Hr1G019020	4.0497	0.016224
HORVU0Hr1G019050	4.07073	0.00216347
HORVU0Hr1G019110	0	-
HORVU0Hr1G019120	0	-
HORVU0Hr1G019280	0	-
HORVU0Hr1G019300	0.263087	0.883204
HORVU0Hr1G019330	0	-
HORVU0Hr1G019350	-0.32256	0.60485
HORVU0Hr1G019360	0	-
HORVU0Hr1G019370	-0.136979	0.704211
HORVU0Hr1G019390	-0.255154	0.47285
HORVU0Hr1G019400	0	-
HORVU0Hr1G019410	0	-
HORVU0Hr1G019420	-2.72065	0.00795224
HORVU0Hr1G019430	0	-
HORVU0Hr1G019450	-0.428791	0.543851
HORVU0Hr1G019500	0.392605	0.58779
HORVU0Hr1G019530	0	-
HORVU0Hr1G019560	0	-
HORVU0Hr1G019570	0	-
HORVU0Hr1G019590	0	1
HORVU0Hr1G019600	0.398884	0.293505
HORVU0Hr1G019610	-0.573236	0.0439847
HORVU0Hr1G019620	0.204131	0.6001
HORVU0Hr1G019630	0	-
HORVU0Hr1G019640	0	-
HORVU0Hr1G019650	0	-
HORVU0Hr1G019660	0	-
HORVU0Hr1G019670	0	-
HORVU0Hr1G019680	0.249589	0.812602
HORVU0Hr1G019690	-0.25242	0.855804
HORVU0Hr1G019700	1.41822	0.0454034
HORVU0Hr1G019710	0.298705	0.180555
HORVU0Hr1G019750	-0.160765	0.828092
HORVU0Hr1G019760	0.746675	0.27745
HORVU0Hr1G019770	-0.687908	0.12249
HORVU0Hr1G019780	-0.660413	0.247588
HORVU0Hr1G019800	-0.806187	0.0312231
HORVU0Hr1G019830	0	-
HORVU0Hr1G019840	-1.2532	0.284566
HORVU0Hr1G019850	-0.579296	0.285481
HORVU0Hr1G019870	0.405034	0.638893
HORVU0Hr1G019920	1.23802	0.323702
HORVU0Hr1G019930	0.0411324	0.968545
HORVU0Hr1G019940	0	-
HORVU0Hr1G019950	0.214244	0.787169
HORVU0Hr1G020040	0	-
HORVU0Hr1G020070	-0.081491	0.860743
HORVU0Hr1G020090	0	-
HORVU0Hr1G020110	-0.175179	0.591587
HORVU0Hr1G020130	0.20845	0.850946
HORVU0Hr1G020140	-0.0168411	0.969275
HORVU0Hr1G020160	0.0150544	0.980793
HORVU0Hr1G020180	-0.149089	0.66581
HORVU0Hr1G020200	0.67877	0.104043
HORVU0Hr1G020210	-0.0360757	0.959806
HORVU0Hr1G020220	0.28259	0.513456
HORVU0Hr1G020230	1.00151	0.341022
HORVU0Hr1G020240	-0.370542	0.496089
HORVU0Hr1G020250	0	-
HORVU0Hr1G020260	-0.188568	0.460157
HORVU0Hr1G020270	2.9145	0.0137796
HORVU0Hr1G020280	0	-
HORVU0Hr1G020290	0	-
HORVU0Hr1G020300	-0.362131	0.683023
HORVU0Hr1G020310	0	-
HORVU0Hr1G020320	0.389484	0.752214
HORVU0Hr1G020330	5.37045	0.0112817
HORVU0Hr1G020340	0	-
HORVU0Hr1G020350	2.42217	0.0445983
HORVU0Hr1G020360	2.19137	0.0102073
HORVU0Hr1G020370	0	-
HORVU0Hr1G020380	0	-
HORVU0Hr1G020400	0	-
HORVU0Hr1G020420	-1.98106	0.00714355
HORVU0Hr1G020450	0.0245712	0.9667
HORVU0Hr1G020460	0	-
HORVU0Hr1G020490	0.0919803	0.84888
HORVU0Hr1G020500	-0.371816	0.391122
HORVU0Hr1G020520	0	-
HORVU0Hr1G020540	0	-
HORVU0Hr1G020550	0	-
HORVU0Hr1G020560	0	-
HORVU0Hr1G020590	-0.159045	0.879265
HORVU0Hr1G020630	-0.810468	0.36115
HORVU0Hr1G020690	0	-
HORVU0Hr1G020700	0	-
HORVU0Hr1G020710	0	-
HORVU0Hr1G020720	0	-
HORVU0Hr1G020730	0.925013	0.0360265
HORVU0Hr1G020740	0	-
HORVU0Hr1G020750	0.956445	0.384985
HORVU0Hr1G020770	1.37122	0.0949783
HORVU0Hr1G020780	1.2593	0.18379
HORVU0Hr1G020790	-0.145711	0.545116
HORVU0Hr1G020800	-0.299436	0.427196
HORVU0Hr1G020810	1.50725	0.0716853
HORVU0Hr1G020840	-0.896898	0.0383031
HORVU0Hr1G020850	-0.854304	0.0763303
HORVU0Hr1G020860	-0.76949	0.112855
HORVU0Hr1G020900	0	-
HORVU0Hr1G020910	0	-
HORVU0Hr1G020930	0	-
HORVU0Hr1G020940	0.99788	0.308027
HORVU0Hr1G020950	0	-
HORVU0Hr1G020960	-0.215113	0.815241
HORVU0Hr1G020980	0.67859	0.0497723
HORVU0Hr1G021000	0.169706	0.693658
HORVU0Hr1G021040	0	-
HORVU0Hr1G021050	0.468745	0.528846
HORVU0Hr1G021060	0.14284	0.606375
HORVU0Hr1G021100	0.0846857	0.833273
HORVU0Hr1G021120	0	-
HORVU0Hr1G021140	0.0561604	0.922835
HORVU0Hr1G021200	-0.656102	0.0931091
HORVU0Hr1G021220	0	-
HORVU0Hr1G021230	-0.12783	0.55874
HORVU0Hr1G021240	0	-
HORVU0Hr1G021280	1.92985	0.134673
HORVU0Hr1G021290	0	-
HORVU0Hr1G021390	0.844617	0.0605453
HORVU0Hr1G021400	1.01028	0.0308819
HORVU0Hr1G021410	0	-
HORVU0Hr1G021440	0	-
HORVU0Hr1G021450	0.0384558	0.96927
HORVU0Hr1G021460	0.20134	0.83688
HORVU0Hr1G021480	-1.23563	0.291427
HORVU0Hr1G021500	-0.168744	0.921902
HORVU0Hr1G021520	0	-
HORVU0Hr1G021540	7.20245	0.0201032
HORVU0Hr1G021590	0.212714	0.854088
HORVU0Hr1G021610	-0.318157	0.807191
HORVU0Hr1G021630	1.94283	0.00377739
HORVU0Hr1G021640	-0.56633	0.263329
HORVU0Hr1G021670	1.91682	0.0803808
HORVU0Hr1G021680	0	-
HORVU0Hr1G021690	-0.14788	0.912777
HORVU0Hr1G021720	1.11836	0.100702
HORVU0Hr1G021730	0.362688	0.330251
HORVU0Hr1G021740	-0.140105	0.678069
HORVU0Hr1G021760	0.527877	0.275431
HORVU0Hr1G021780	-0.26599	0.6844
HORVU0Hr1G021800	1.68469	0.026766
HORVU0Hr1G021810	1.11014	0.0221706
HORVU0Hr1G021820	0	-
HORVU0Hr1G021830	0	-
HORVU0Hr1G021850	-1.28991	0.00228175
HORVU0Hr1G021860	-0.557448	0.093397
HORVU0Hr1G021880	-0.105649	0.677516
HORVU0Hr1G021890	0	-
HORVU0Hr1G021920	0	-
HORVU0Hr1G021930	-0.055677	0.938506
HORVU0Hr1G021940	-0.30428	0.253774
HORVU0Hr1G021950	0.428873	0.251657
HORVU0Hr1G021960	-0.176259	0.658854
HORVU0Hr1G021970	-0.159412	0.686578
HORVU0Hr1G021980	0.427815	0.141827
HORVU0Hr1G022000	-0.785013	0.109433
HORVU0Hr1G022020	-2.39704	0.0296591
HORVU0Hr1G022030	-0.289282	0.773834
HORVU0Hr1G022050	0.36957	0.110118
HORVU0Hr1G022060	0.574876	0.401738
HORVU0Hr1G022070	0.170152	0.928145
HORVU0Hr1G022090	0.509076	0.713297
HORVU0Hr1G022100	4.62616	0.00107337
HORVU0Hr1G022110	3.56998	0.00935211
HORVU0Hr1G022130	0	-
HORVU0Hr1G022140	0	-
HORVU0Hr1G022150	0	-
HORVU0Hr1G022160	0.0553248	0.888346
HORVU0Hr1G022170	0	-
HORVU0Hr1G022190	0	-
HORVU0Hr1G022200	0	-
HORVU0Hr1G022220	0	-
HORVU0Hr1G022230	0	-
HORVU0Hr1G022240	0.0189746	0.959165
HORVU0Hr1G022260	0.151598	0.910256
HORVU0Hr1G022270	0.0807609	0.819549
HORVU0Hr1G022280	0.0799574	0.881559
HORVU0Hr1G022290	0.176964	0.820722
HORVU0Hr1G022300	0.333363	0.0643812
HORVU0Hr1G022310	0.165748	0.555027
HORVU0Hr1G022320	0	-
HORVU0Hr1G022330	2.5298	0.0338712
HORVU0Hr1G022340	-0.985849	0.0927155
HORVU0Hr1G022350	-0.0122112	0.996616
HORVU0Hr1G022360	-0.279403	0.86144
HORVU0Hr1G022370	-0.592183	0.429719
HORVU0Hr1G022380	-1.11563	0.0615771
HORVU0Hr1G022390	0	-
HORVU0Hr1G022440	-0.840611	0.0927228
HORVU0Hr1G022450	-0.840687	0.356035
HORVU0Hr1G022460	-0.0841423	0.798782
HORVU0Hr1G022470	0.131678	0.772515
HORVU0Hr1G022480	-0.954922	0.0302022
HORVU0Hr1G022500	0.0197834	0.9667
HORVU0Hr1G022510	-0.1405	0.556923
HORVU0Hr1G022520	0	-
HORVU0Hr1G022540	0	-
HORVU0Hr1G022550	0.0361876	0.970723
HORVU0Hr1G022570	0	-
HORVU0Hr1G022580	-0.0169412	0.967176
HORVU0Hr1G022590	0.0882822	0.860908
HORVU0Hr1G022610	1.70523	0.487398
HORVU0Hr1G022650	7.09196	0.00034621
HORVU0Hr1G022670	-0.652741	0.060947
HORVU0Hr1G022680	0	-
HORVU0Hr1G022690	0.430753	0.801587
HORVU0Hr1G022730	0	-
HORVU0Hr1G022740	0	-
HORVU0Hr1G022750	0	-
HORVU0Hr1G022770	0	-
HORVU0Hr1G022780	2.31918	0.126957
HORVU0Hr1G022790	0	-
HORVU0Hr1G022810	0.41249	0.195952
HORVU0Hr1G022820	0.189114	0.877514
HORVU0Hr1G022830	0.112892	0.694922
HORVU0Hr1G022870	0	-
HORVU0Hr1G023050	0	-
HORVU0Hr1G023060	0	-
HORVU0Hr1G023080	0	-
HORVU0Hr1G023090	0	-
HORVU0Hr1G023120	0	-
HORVU0Hr1G023140	0.30369	0.461565
HORVU0Hr1G023150	-0.159949	0.767794
HORVU0Hr1G023160	0	-
HORVU0Hr1G023170	0	-
HORVU0Hr1G023180	-0.180712	0.6719
HORVU0Hr1G023190	0	-
HORVU0Hr1G023200	-0.652105	0.0976428
HORVU0Hr1G023240	0	-
HORVU0Hr1G023250	-0.459716	0.247218
HORVU0Hr1G023260	0	-
HORVU0Hr1G023280	-0.104424	0.752526
HORVU0Hr1G023290	0.0392326	0.936526
HORVU0Hr1G023300	0.294471	0.186632
HORVU0Hr1G023320	0	-
HORVU0Hr1G023330	0.550425	0.295431
HORVU0Hr1G023360	-0.307861	0.907437
HORVU0Hr1G023420	0	-
HORVU0Hr1G023460	-0.336617	0.202369
HORVU0Hr1G023470	-0.198976	0.492874
HORVU0Hr1G023480	0.00438216	0.997622
HORVU0Hr1G023490	0	-
HORVU0Hr1G023510	0.275925	0.214765
HORVU0Hr1G023540	0.0755106	0.922625
HORVU0Hr1G023570	-4.59118	0.427042
HORVU0Hr1G023590	1.34901	0.545099
HORVU0Hr1G023600	0	-
HORVU0Hr1G023610	0	-
HORVU0Hr1G023640	-0.612696	0.0458884
HORVU0Hr1G023660	0.0423074	0.948743
HORVU0Hr1G023690	0	-
HORVU0Hr1G023700	0	-
HORVU0Hr1G023710	0	-
HORVU0Hr1G023720	0	-
HORVU0Hr1G023740	-2.66166	0.00571014
HORVU0Hr1G023750	-0.012167	0.984739
HORVU0Hr1G023760	-0.0352957	0.953195
HORVU0Hr1G023810	0	-
HORVU0Hr1G023830	0	-
HORVU0Hr1G023840	0	-
HORVU0Hr1G023870	-0.0544384	0.966588
HORVU0Hr1G023890	0.039795	0.974307
HORVU0Hr1G023910	0.0212236	0.987067
HORVU0Hr1G023920	-0.0686317	0.956075
HORVU0Hr1G023930	0.15118	0.876042
HORVU0Hr1G023940	0.444556	0.563101
HORVU0Hr1G023950	0	-
HORVU0Hr1G023970	0.359059	0.645327
HORVU0Hr1G023980	0.34605	0.637649
HORVU0Hr1G023990	-0.13505	0.866346
HORVU0Hr1G024020	-0.312722	0.767567
HORVU0Hr1G024030	-0.00517148	0.996944
HORVU0Hr1G024050	0.490603	0.564039
HORVU0Hr1G024060	-0.874513	0.513246
HORVU0Hr1G024070	0.352345	0.705085
HORVU0Hr1G024100	0	-
HORVU0Hr1G024120	0.00771592	0.995388
HORVU0Hr1G024130	0.256772	0.747795
HORVU0Hr1G024140	-0.468881	0.740133
HORVU0Hr1G024160	0.233721	0.785628
HORVU0Hr1G024170	-0.0601373	0.963086
HORVU0Hr1G024180	-0.079284	0.947311
HORVU0Hr1G024190	0	-
HORVU0Hr1G024200	-0.733376	0.29324
HORVU0Hr1G024220	0.431361	0.510407
HORVU0Hr1G024230	-0.281911	0.80233
HORVU0Hr1G024270	0.432237	0.509324
HORVU0Hr1G024280	0.805818	0.180282
HORVU0Hr1G024300	-0.270157	0.790391
HORVU0Hr1G024310	0	-
HORVU0Hr1G024320	-0.259831	0.626239
HORVU0Hr1G024390	0	-
HORVU0Hr1G024400	0	-
HORVU0Hr1G024440	0.950651	0.446401
HORVU0Hr1G024450	-0.730202	0.370632
HORVU0Hr1G024460	0	-
HORVU0Hr1G024470	0.0608479	0.974172
HORVU0Hr1G024480	-0.162788	0.826683
HORVU0Hr1G024490	-0.464638	0.308739
HORVU0Hr1G024520	0.676054	0.528504
HORVU0Hr1G024530	0.0101845	0.991279
HORVU0Hr1G024540	0.0299239	0.9667
HORVU0Hr1G024550	-0.140504	0.853494
HORVU0Hr1G024560	-0.381443	0.672836
HORVU0Hr1G024580	-0.201836	0.792469
HORVU0Hr1G024610	-0.358731	0.678505
HORVU0Hr1G024620	-0.401808	0.387481
HORVU0Hr1G024630	0.970124	0.190992
HORVU0Hr1G024650	0.129073	0.92157
HORVU0Hr1G024670	-0.332233	0.683615
HORVU0Hr1G024680	-0.401808	0.387481
HORVU0Hr1G024690	0	-
HORVU0Hr1G024700	0.146277	0.849042
HORVU0Hr1G024720	-0.722056	0.159135
HORVU0Hr1G024740	-0.106121	0.706359
HORVU0Hr1G024750	0.950651	0.446401
HORVU0Hr1G024760	1.20017	0.104771
HORVU0Hr1G024790	-0.401966	0.638555
HORVU0Hr1G024810	-0.0846784	0.92007
HORVU0Hr1G024830	-0.114437	0.891344
HORVU0Hr1G024840	0	-
HORVU0Hr1G024880	-0.328687	0.717411
HORVU0Hr1G024890	-0.495412	0.558755
HORVU0Hr1G024900	-0.0876836	0.906544
HORVU0Hr1G024920	-0.928614	0.0536975
HORVU0Hr1G024930	0.457676	0.551104
HORVU0Hr1G024950	1.19532	0.148377
HORVU0Hr1G024960	-0.656727	0.0860998
HORVU0Hr1G024970	-0.166111	0.90416
HORVU0Hr1G024980	0.0101845	0.991279
HORVU0Hr1G024990	0.194635	0.920142
HORVU0Hr1G025010	-0.0531645	0.951235
HORVU0Hr1G025040	0.0323934	0.976526
HORVU0Hr1G025100	0.524122	0.756571
HORVU0Hr1G025110	0.20588	0.91613
HORVU0Hr1G025120	-0.420947	0.651915
HORVU0Hr1G025160	-0.339667	0.682603
HORVU0Hr1G025180	0.115445	0.953447
HORVU0Hr1G025190	0.884329	0.235616
HORVU0Hr1G025220	-0.0224445	0.982532
HORVU0Hr1G025240	-0.167194	0.882056
HORVU0Hr1G025250	0	-
HORVU0Hr1G025290	0	-
HORVU0Hr1G025310	0	-
HORVU0Hr1G025330	0	-
HORVU0Hr1G025370	0	-
HORVU0Hr1G025390	0	-
HORVU0Hr1G025410	0.0766769	0.902609
HORVU0Hr1G025420	0	-
HORVU0Hr1G025430	0	-
HORVU0Hr1G025440	1.3373	0.0868515
HORVU0Hr1G025460	0.299456	0.806335
HORVU0Hr1G025520	0	-
HORVU0Hr1G025530	0	-
HORVU0Hr1G025540	-0.133626	0.672057
HORVU0Hr1G025620	0	-
HORVU0Hr1G025630	-0.419772	0.647101
HORVU0Hr1G025650	-0.965197	0.382746
HORVU0Hr1G025660	0	-
HORVU0Hr1G025670	0	-
HORVU0Hr1G025690	0	-
HORVU0Hr1G025700	1.29084	0.372876
HORVU0Hr1G025750	0	-
HORVU0Hr1G025760	0	-
HORVU0Hr1G025770	0	-
HORVU0Hr1G025790	0.904091	0.14014
HORVU0Hr1G025800	3.04054	0.0493207
HORVU0Hr1G025810	2.94984	0.0536935
HORVU0Hr1G025820	0.0274132	0.9667
HORVU0Hr1G025850	-0.790607	0.248158
HORVU0Hr1G025860	-0.043613	0.943164
HORVU0Hr1G025870	-0.049285	0.909587
HORVU0Hr1G025890	-0.322395	0.459126
HORVU0Hr1G025900	0.125272	0.742595
HORVU0Hr1G025910	-0.90013	0.0718175
HORVU0Hr1G025920	0.233174	0.639628
HORVU0Hr1G025970	0	-
HORVU0Hr1G026010	-0.0645593	0.908493
HORVU0Hr1G026030	0.506803	0.257699
HORVU0Hr1G026070	-0.0784773	0.924657
HORVU0Hr1G026090	-0.295649	0.752207
HORVU0Hr1G026120	0.195931	0.876042
HORVU0Hr1G026130	0.174539	0.915226
HORVU0Hr1G026140	0.0518487	0.960193
HORVU0Hr1G026150	-0.422147	0.399053
HORVU0Hr1G026160	-0.545455	0.560858
HORVU0Hr1G026170	-0.401808	0.387481
HORVU0Hr1G026190	0.629925	0.311149
HORVU0Hr1G026200	0.814424	0.212398
HORVU0Hr1G026230	0.241208	0.680113
HORVU0Hr1G026250	1.46903	0.0568095
HORVU0Hr1G026260	0.798878	0.306278
HORVU0Hr1G026270	0.847074	0.216091
HORVU0Hr1G026280	0.635435	0.294568
HORVU0Hr1G026290	-0.401808	0.387481
HORVU0Hr1G026330	-0.475601	0.556513
HORVU0Hr1G026340	0	-
HORVU0Hr1G026370	0	-
HORVU0Hr1G026390	0	-
HORVU0Hr1G026410	0	-
HORVU0Hr1G026430	0.56963	0.400275
HORVU0Hr1G026480	0.156045	0.870082
HORVU0Hr1G026500	-0.39584	0.379372
HORVU0Hr1G026520	0	-
HORVU0Hr1G026530	0	-
HORVU0Hr1G026540	0	-
HORVU0Hr1G026550	0	-
HORVU0Hr1G026560	0	-
HORVU0Hr1G026590	0.104889	0.959165
HORVU0Hr1G026620	0	-
HORVU0Hr1G026630	0	-
HORVU0Hr1G026640	-0.274634	0.698818
HORVU0Hr1G026650	0.440372	0.516421
HORVU0Hr1G026660	0	-
HORVU0Hr1G026690	0	-
HORVU0Hr1G026700	0.348354	0.384747
HORVU0Hr1G026710	0.145976	0.894344
HORVU0Hr1G026730	0	-
HORVU0Hr1G026770	0.241208	0.680113
HORVU0Hr1G026780	0.549694	0.6001
HORVU0Hr1G026790	0.396409	0.6756
HORVU0Hr1G026800	0.811414	0.303449
HORVU0Hr1G026810	0.837079	0.216663
HORVU0Hr1G026820	0.714892	0.208895
HORVU0Hr1G026830	-0.401808	0.387481
HORVU0Hr1G026860	1.28296	0.160991
HORVU0Hr1G026870	0.414864	0.655258
HORVU0Hr1G026890	0.39356	0.55499
HORVU0Hr1G026900	0.245879	0.675394
HORVU0Hr1G026910	0.242196	0.8142
HORVU0Hr1G026930	0	-
HORVU0Hr1G026940	0.738607	0.368132
HORVU0Hr1G026950	0.245879	0.675394
HORVU0Hr1G026990	0.0796473	0.968545
HORVU0Hr1G027000	-4.09056	0.0112817
HORVU0Hr1G027010	-0.213321	0.305622
HORVU0Hr1G027030	0	-
HORVU0Hr1G027050	-0.139174	0.842008
HORVU0Hr1G027060	-0.458934	0.027529
HORVU0Hr1G027070	-0.737925	0.0833371
HORVU0Hr1G027080	-0.649322	0.0860412
HORVU0Hr1G027100	0	-
HORVU0Hr1G027130	-0.311214	0.365743
HORVU0Hr1G027160	-0.429817	0.213047
HORVU0Hr1G027170	-0.638876	0.0251065
HORVU0Hr1G027200	0.26703	0.870488
HORVU0Hr1G027230	-0.429817	0.213047
HORVU0Hr1G027280	0	-
HORVU0Hr1G027290	0.532764	0.0733508
HORVU0Hr1G027310	-1.00309	0.0674614
HORVU0Hr1G027380	0	-
HORVU0Hr1G027400	0	-
HORVU0Hr1G027410	-0.276905	0.812142
HORVU0Hr1G027430	-0.311077	0.672073
HORVU0Hr1G027440	-0.629705	0.312517
HORVU0Hr1G027450	0	-
HORVU0Hr1G027460	-0.726766	0.400845
HORVU0Hr1G027480	0	-
HORVU0Hr1G027490	-0.90013	0.0718175
HORVU0Hr1G027510	-0.133728	0.883786
HORVU0Hr1G027520	0.585747	0.344049
HORVU0Hr1G027540	-0.488335	0.341236
HORVU0Hr1G027550	-0.369945	0.488924
HORVU0Hr1G027560	0.122534	0.934692
HORVU0Hr1G027570	0	-
HORVU0Hr1G027600	-0.390552	0.577584
HORVU0Hr1G027620	-0.298305	0.73818
HORVU0Hr1G027640	0.652064	0.378079
HORVU0Hr1G027660	-0.302016	0.439637
HORVU0Hr1G027670	0.139535	0.726865
HORVU0Hr1G027680	-0.272439	0.172221
HORVU0Hr1G027900	-0.273677	0.61621
HORVU0Hr1G027910	-0.0207845	0.982178
HORVU0Hr1G027920	0	-
HORVU0Hr1G027940	0	-
HORVU0Hr1G027960	-0.458893	0.320996
HORVU0Hr1G027970	-0.145565	0.6026
HORVU0Hr1G027980	0.35145	0.778428
HORVU0Hr1G027990	0	-
HORVU0Hr1G028010	-0.156087	0.598678
HORVU0Hr1G028040	0	-
HORVU0Hr1G028080	-0.0574301	0.879046
HORVU0Hr1G028130	1.32552	0.0102073
HORVU0Hr1G028140	1.51731	0.0182276
HORVU0Hr1G028170	0.139722	0.666675
HORVU0Hr1G028210	0	-
HORVU0Hr1G028230	-0.319799	0.687391
HORVU0Hr1G028270	-0.300995	0.492371
HORVU0Hr1G028300	0	-
HORVU0Hr1G028320	-0.90013	0.0718175
HORVU0Hr1G028350	0.234948	0.662641
HORVU0Hr1G028360	0.822545	0.302249
HORVU0Hr1G028370	0.844263	0.243122
HORVU0Hr1G028380	0.550443	0.380335
HORVU0Hr1G028390	-0.401808	0.387481
HORVU0Hr1G028400	-0.324912	0.707466
HORVU0Hr1G028410	-0.0148617	0.988401
HORVU0Hr1G028420	0.195931	0.876042
HORVU0Hr1G028450	-0.201836	0.792469
HORVU0Hr1G028470	-0.154597	0.85179
HORVU0Hr1G028480	-0.315418	0.594779
HORVU0Hr1G028530	-0.0875727	0.91241
HORVU0Hr1G028540	0.36079	0.679709
HORVU0Hr1G028550	0	-
HORVU0Hr1G028560	-0.598908	0.715765
HORVU0Hr1G028570	0.0608479	0.974172
HORVU0Hr1G028580	-0.730202	0.370632
HORVU0Hr1G028590	0.950651	0.446401
HORVU0Hr1G028600	0.768279	0.49345
HORVU0Hr1G028640	0.0796473	0.968545
HORVU0Hr1G028650	0.241208	0.680113
HORVU0Hr1G028660	0.332157	0.790391
HORVU0Hr1G028670	-0.44492	0.285512
HORVU0Hr1G028680	0.995479	0.156141
HORVU0Hr1G028710	-0.0859075	0.899183
HORVU0Hr1G028890	0	-
HORVU0Hr1G028900	1.1158	0.392514
HORVU0Hr1G028920	-0.098278	0.949626
HORVU0Hr1G028930	0.260814	0.42108
HORVU0Hr1G028950	1.0267	0.160663
HORVU0Hr1G028970	-0.339989	0.649659
HORVU0Hr1G028990	0.0345803	0.922179
HORVU0Hr1G029050	-0.197843	0.826987
HORVU0Hr1G029090	0.0629344	0.937745
HORVU0Hr1G029100	0	-
HORVU0Hr1G029110	0	-
HORVU0Hr1G029140	-0.357804	0.441252
HORVU0Hr1G029180	0.486981	0.391546
HORVU0Hr1G029190	-0.673858	0.335827
HORVU0Hr1G029200	1.1847	0.0330368
HORVU0Hr1G029210	0	-
HORVU0Hr1G029220	0	-
HORVU0Hr1G029230	0	-
HORVU0Hr1G029310	0.339203	0.645917
HORVU0Hr1G029320	0.285087	0.705387
HORVU0Hr1G029340	0.351572	0.617886
HORVU0Hr1G029350	0.171399	0.844861
HORVU0Hr1G029370	-0.106458	0.866049
HORVU0Hr1G029460	0.56419	0.473507
HORVU0Hr1G029480	1.19274	0.110833
HORVU0Hr1G029490	0	-
HORVU0Hr1G029500	-0.401884	0.593379
HORVU0Hr1G029520	0.189011	0.730334
HORVU0Hr1G029570	0	-
HORVU0Hr1G029590	-0.273757	0.633994
HORVU0Hr1G029600	-0.266981	0.596039
HORVU0Hr1G029660	0.332157	0.790391
HORVU0Hr1G029670	-0.0826713	0.798491
HORVU0Hr1G029680	0.950651	0.446401
HORVU0Hr1G029690	-0.730202	0.370632
HORVU0Hr1G029720	-0.0287377	0.953471
HORVU0Hr1G029730	0.0636566	0.918033
HORVU0Hr1G029750	0.0731015	0.935902
HORVU0Hr1G029760	-0.0895987	0.912778
HORVU0Hr1G029770	-0.153721	0.839663
HORVU0Hr1G029780	-0.265685	0.771346
HORVU0Hr1G029790	-0.207278	0.813426
HORVU0Hr1G029810	-0.222869	0.758788
HORVU0Hr1G029850	-0.590349	0.707363
HORVU0Hr1G029860	0.269343	0.774299
HORVU0Hr1G029870	0.195931	0.876042
HORVU0Hr1G029880	0.174539	0.915226
HORVU0Hr1G029890	0.0518487	0.960193
HORVU0Hr1G029900	-0.422147	0.399053
HORVU0Hr1G029910	-0.299611	0.458167
HORVU0Hr1G029920	-0.332233	0.683615
HORVU0Hr1G029930	-0.401808	0.387481
HORVU0Hr1G029960	0.734569	0.14548
HORVU0Hr1G029980	0	-
HORVU0Hr1G030000	0	-
HORVU0Hr1G030010	-0.282958	0.404098
HORVU0Hr1G030030	0	-
HORVU0Hr1G030060	0	-
HORVU0Hr1G030080	0.364155	0.685145
HORVU0Hr1G030090	0.156963	0.9096
HORVU0Hr1G030100	0	-
HORVU0Hr1G030120	0.028814	0.952101
HORVU0Hr1G030130	0	-
HORVU0Hr1G030140	0	-
HORVU0Hr1G030160	0.00717619	0.996236
HORVU0Hr1G030170	0	-
HORVU0Hr1G030190	-0.530053	0.289747
HORVU0Hr1G030200	0.589466	0.0864374
HORVU0Hr1G030280	0.226847	0.56282
HORVU0Hr1G030300	-0.256837	0.354646
HORVU0Hr1G030310	0	-
HORVU0Hr1G030360	0	-
HORVU0Hr1G030370	0	-
HORVU0Hr1G030380	0	-
HORVU0Hr1G030390	0	-
HORVU0Hr1G030440	0.10549	0.680076
HORVU0Hr1G030450	0.100977	0.817267
HORVU0Hr1G030460	-0.465083	0.102023
HORVU0Hr1G030500	5.37966	0.00558622
HORVU0Hr1G030510	0	-
HORVU0Hr1G030520	0.967877	0.565771
HORVU0Hr1G030570	0	-
HORVU0Hr1G030600	0.202548	0.881345
HORVU0Hr1G030630	0.7804	0.179291
HORVU0Hr1G030640	1.04897	0.0785219
HORVU0Hr1G030650	0	-
HORVU0Hr1G030660	0	-
HORVU0Hr1G030670	0	-
HORVU0Hr1G030680	0	-
HORVU0Hr1G030690	0.635435	0.294568
HORVU0Hr1G030700	-0.488335	0.341236
HORVU0Hr1G030710	0.122534	0.934692
HORVU0Hr1G030740	-0.459721	0.474069
HORVU0Hr1G030760	0.0920616	0.917381
HORVU0Hr1G030770	-0.304179	0.602778
HORVU0Hr1G030780	-0.0482326	0.959642
HORVU0Hr1G030810	-0.279597	0.486618
HORVU0Hr1G030820	0.211605	0.602778
HORVU0Hr1G030830	-0.73062	0.530345
HORVU0Hr1G030860	0	-
HORVU0Hr1G030870	0	-
HORVU0Hr1G030920	-0.20884	0.444277
HORVU0Hr1G030950	0	-
HORVU0Hr1G030970	0	-
HORVU0Hr1G030980	-0.350509	0.256624
HORVU0Hr1G031050	-0.0154034	0.9921
HORVU0Hr1G031060	0.274696	0.822192
HORVU0Hr1G031070	-0.0144196	0.987349
HORVU0Hr1G031080	0	-
HORVU0Hr1G031100	0	-
HORVU0Hr1G031130	0	-
HORVU0Hr1G031140	0.0896587	0.959453
HORVU0Hr1G031170	1.14548	0.00145223
HORVU0Hr1G031210	0	-
HORVU0Hr1G031250	0.0796473	0.968545
HORVU0Hr1G031270	-0.207326	0.813426
HORVU0Hr1G031290	0.650527	0.496384
HORVU0Hr1G031300	-0.733851	0.128448
HORVU0Hr1G031330	-0.493172	0.560533
HORVU0Hr1G031350	-0.0774136	0.957482
HORVU0Hr1G031360	-0.125777	0.885979
HORVU0Hr1G031380	-0.625348	0.666037
HORVU0Hr1G031420	-0.121491	0.76576
HORVU0Hr1G031430	0.0101845	0.991279
HORVU0Hr1G031440	0.0518487	0.960193
HORVU0Hr1G031450	-0.228362	0.691664
HORVU0Hr1G031470	-0.13457	0.870488
HORVU0Hr1G031480	0.0145613	0.986547
HORVU0Hr1G031500	0.311406	0.370022
HORVU0Hr1G031520	-0.0134437	0.977618
HORVU0Hr1G031580	8.61885	6.78822e-05
HORVU0Hr1G031620	0	-
HORVU0Hr1G031630	0	-
HORVU0Hr1G031640	0	-
HORVU0Hr1G031650	0	-
HORVU0Hr1G031660	0	-
HORVU0Hr1G031690	0.305719	0.311002
HORVU0Hr1G031700	1.00761	0.136604
HORVU0Hr1G031710	1.51128	0.0743857
HORVU0Hr1G031720	0.101744	0.88504
HORVU0Hr1G031730	-0.0841332	0.901125
HORVU0Hr1G031750	0	-
HORVU0Hr1G031760	-0.00545414	0.987567
HORVU0Hr1G031790	0	-
HORVU0Hr1G031810	-0.188356	0.656023
HORVU0Hr1G031830	0	-
HORVU0Hr1G031850	0.242538	0.47765
HORVU0Hr1G031890	0.1525	0.795581
HORVU0Hr1G031910	0	-
HORVU0Hr1G031920	-0.00459757	0.996547
HORVU0Hr1G031930	0.559035	0.858165
HORVU0Hr1G031950	-0.874513	0.513246
HORVU0Hr1G031960	-0.0936003	0.75072
HORVU0Hr1G031970	-0.539746	0.378615
HORVU0Hr1G031980	-0.761974	0.0023213
HORVU0Hr1G031990	0	-
HORVU0Hr1G032000	1.074	0.411338
HORVU0Hr1G032020	-0.0982749	0.950448
HORVU0Hr1G032040	0	-
HORVU0Hr1G032060	0	-
HORVU0Hr1G032070	0.909392	0.21701
HORVU0Hr1G032100	4.93699	0.00311415
HORVU0Hr1G032110	-0.386442	0.484227
HORVU0Hr1G032120	-0.367899	0.340946
HORVU0Hr1G032130	0	-
HORVU0Hr1G032140	-4.09056	0.0112817
HORVU0Hr1G032200	0	-
HORVU0Hr1G032220	0	-
HORVU0Hr1G032230	-0.674875	0.501178
HORVU0Hr1G032250	0.0927688	0.899744
HORVU0Hr1G032260	1.63949	0.0087112
HORVU0Hr1G032280	0.0314052	0.974219
HORVU0Hr1G032300	0	-
HORVU0Hr1G032310	0	-
HORVU0Hr1G032320	-0.823714	0.0502205
HORVU0Hr1G032330	-0.823714	0.0502205
HORVU0Hr1G032340	0	-
HORVU0Hr1G032350	1.47981	0.100552
HORVU0Hr1G032360	-0.251823	0.468875
HORVU0Hr1G032370	-0.816064	0.518091
HORVU0Hr1G032390	-0.613213	0.0319495
HORVU0Hr1G032400	0.108858	0.84063
HORVU0Hr1G032410	0	-
HORVU0Hr1G032440	0	-
HORVU0Hr1G032490	1.22797	0.503039
HORVU0Hr1G032510	0	-
HORVU0Hr1G032540	0.988602	0.173456
HORVU0Hr1G032560	0	-
HORVU0Hr1G032570	-0.733851	0.128448
HORVU0Hr1G032600	1.19992	0.104963
HORVU0Hr1G032620	0.650527	0.496384
HORVU0Hr1G032640	-0.496286	0.557332
HORVU0Hr1G032670	0	-
HORVU0Hr1G032690	0	-
HORVU0Hr1G032700	0	-
HORVU0Hr1G032710	0.257049	0.796337
HORVU0Hr1G032720	0	-
HORVU0Hr1G032730	0.36079	0.679709
HORVU0Hr1G032740	-0.162788	0.826683
HORVU0Hr1G032800	-0.109758	0.897849
HORVU0Hr1G032810	0.0283894	0.968329
HORVU0Hr1G032820	-0.315418	0.594779
HORVU0Hr1G032830	0.707412	0.215367
HORVU0Hr1G032840	0	-
HORVU0Hr1G032850	0	-
HORVU0Hr1G032860	0	-
HORVU0Hr1G032870	0	-
HORVU0Hr1G032890	0	-
HORVU0Hr1G032900	0	-
HORVU0Hr1G032910	0.245879	0.675394
HORVU0Hr1G032920	0.798877	0.305502
HORVU0Hr1G032930	0.814424	0.213047
HORVU0Hr1G032940	0.639292	0.308075
HORVU0Hr1G032950	-0.401808	0.387481
HORVU0Hr1G032960	-0.0148617	0.988401
HORVU0Hr1G032970	0.184162	0.884551
HORVU0Hr1G032980	-0.671419	0.730334
HORVU0Hr1G033000	-0.102856	0.896709
HORVU0Hr1G033020	-0.102649	0.915304
HORVU0Hr1G033030	-0.354433	0.718503
HORVU0Hr1G033050	0.0219754	0.982609
HORVU0Hr1G033060	-0.13457	0.870488
HORVU0Hr1G033070	-0.394791	0.523098
HORVU0Hr1G033090	0.336694	0.841966
HORVU0Hr1G033120	0	-
HORVU0Hr1G033130	0.0796473	0.968545
HORVU0Hr1G033160	0	-
HORVU0Hr1G033170	0	-
HORVU0Hr1G033190	0	-
HORVU0Hr1G033200	0.746623	0.054949
HORVU0Hr1G033220	0	-
HORVU0Hr1G033250	0	-
HORVU0Hr1G033260	-0.355567	0.639852
HORVU0Hr1G033280	-0.201836	0.792469
HORVU0Hr1G033290	0.69076	0.518806
HORVU0Hr1G033300	0.336694	0.841966
HORVU0Hr1G033320	0	-
HORVU0Hr1G033330	1.02779	0.023413
HORVU0Hr1G033360	-0.195707	0.863295
HORVU0Hr1G033370	-0.135088	0.91198
HORVU0Hr1G033410	0.241208	0.680113
HORVU0Hr1G033420	1.45368	0.052371
HORVU0Hr1G033440	0.832127	0.224026
HORVU0Hr1G033450	0.552115	0.376617
HORVU0Hr1G033460	-0.401808	0.387481
HORVU0Hr1G033470	-0.0148617	0.988401
HORVU0Hr1G033480	0.174539	0.915226
HORVU0Hr1G033490	0.195931	0.876042
HORVU0Hr1G033520	-0.201836	0.792469
HORVU0Hr1G033540	0.22779	0.847914
HORVU0Hr1G033550	-0.105329	0.928733
HORVU0Hr1G033560	-0.339272	0.788497
HORVU0Hr1G033570	-0.656941	0.0860998
HORVU0Hr1G033600	0.0796473	0.968545
HORVU0Hr1G033630	-0.146804	0.794142
HORVU0Hr1G033640	0	-
HORVU0Hr1G033660	0.0179019	0.969348
HORVU0Hr1G033670	0	-
HORVU0Hr1G033690	1.46229	0.0577243
HORVU0Hr1G033700	0.79238	0.313461
HORVU0Hr1G033710	0.814424	0.212398
HORVU0Hr1G033720	0.692873	0.222145
HORVU0Hr1G033730	-0.397779	0.372042
HORVU0Hr1G033740	-0.0148617	0.988401
HORVU0Hr1G033750	0.195931	0.876042
HORVU0Hr1G033770	-0.201836	0.792469
HORVU0Hr1G033790	-0.315168	0.743154
HORVU0Hr1G033800	-0.13457	0.870488
HORVU0Hr1G033810	-0.315418	0.594779
HORVU0Hr1G033820	-0.0361911	0.967257
HORVU0Hr1G033850	0.332157	0.790391
HORVU0Hr1G033860	0.950651	0.446401
HORVU0Hr1G033870	-0.35096	0.82884
HORVU0Hr1G033880	-0.598896	0.71769
HORVU0Hr1G033890	0	-
HORVU0Hr1G033900	-0.162788	0.826683
HORVU0Hr1G033940	0	-
HORVU0Hr1G033970	0.0796473	0.968545
HORVU0Hr1G033990	-0.105329	0.928733
HORVU0Hr1G034000	-0.339272	0.788497
HORVU0Hr1G034010	-0.656941	0.0860998
HORVU0Hr1G034040	0.111928	0.867749
HORVU0Hr1G034050	-0.105329	0.928733
HORVU0Hr1G034080	0	-
HORVU0Hr1G034090	0	-
HORVU0Hr1G034110	0	-
HORVU0Hr1G034120	0	-
HORVU0Hr1G034130	0	-
HORVU0Hr1G034150	-0.0713706	0.948286
HORVU0Hr1G034160	0.637769	0.404298
HORVU0Hr1G034190	0.0608479	0.974172
HORVU0Hr1G034210	-0.496334	0.557332
HORVU0Hr1G034240	-0.154808	0.886332
HORVU0Hr1G034250	-0.252039	0.522296
HORVU0Hr1G034260	-0.7428	0.366242
HORVU0Hr1G034280	-0.625348	0.666037
HORVU0Hr1G034290	0.487105	0.471989
HORVU0Hr1G034300	0.103629	0.93742
HORVU0Hr1G034320	-0.455061	0.628325
HORVU0Hr1G034330	0.195931	0.876042
HORVU0Hr1G034340	0.67942	0.207697
HORVU0Hr1G034350	-0.537748	0.17178
HORVU0Hr1G034370	0.224254	0.803917
HORVU0Hr1G034380	-0.294531	0.563314
HORVU0Hr1G034420	-0.230065	0.866389
HORVU0Hr1G034430	0.813048	0.466823
HORVU0Hr1G034460	-0.401808	0.387481
HORVU0Hr1G034470	0.580209	0.482112
HORVU0Hr1G034480	0.87398	0.179628
HORVU0Hr1G034500	-0.404793	0.705195
HORVU0Hr1G034510	0.508265	0.746878
HORVU0Hr1G034520	-0.37385	0.661356
HORVU0Hr1G034540	-0.262817	0.706689
HORVU0Hr1G034550	-0.12018	0.843762
HORVU0Hr1G034600	0.208078	0.738337
HORVU0Hr1G034610	-0.420127	0.575323
HORVU0Hr1G034630	0.307855	0.711699
HORVU0Hr1G034640	0.389274	0.633113
HORVU0Hr1G034650	1.51524	0.0825462
HORVU0Hr1G034660	0.873946	0.372017
HORVU0Hr1G034700	0.298654	0.737881
HORVU0Hr1G034720	0.144932	0.818833
HORVU0Hr1G034730	-0.122811	0.763244
HORVU0Hr1G034740	0.682421	0.375511
HORVU0Hr1G034750	0.103629	0.93742
HORVU0Hr1G034770	-0.121491	0.76576
HORVU0Hr1G034780	-0.463914	0.573025
HORVU0Hr1G034790	-0.733851	0.128448
HORVU0Hr1G034800	-0.139672	0.868071
HORVU0Hr1G034830	-0.0481649	0.928733
HORVU0Hr1G034850	0.560581	0.457417
HORVU0Hr1G034860	0.112006	0.955574
HORVU0Hr1G034900	0	-
HORVU0Hr1G034910	0	-
HORVU0Hr1G034930	0.207943	0.831588
HORVU0Hr1G034940	0.217484	0.820497
HORVU0Hr1G034950	0.2325	0.820069
HORVU0Hr1G034960	0.119869	0.862915
HORVU0Hr1G034970	0.0989123	0.934134
HORVU0Hr1G034980	0.182191	0.817766
HORVU0Hr1G035010	0	-
HORVU0Hr1G035030	-0.098278	0.949626
HORVU0Hr1G035060	0	-
HORVU0Hr1G035110	0	-
HORVU0Hr1G035140	0	-
HORVU0Hr1G035160	0.241208	0.680113
HORVU0Hr1G035170	-0.401808	0.387481
HORVU0Hr1G035180	-0.0148617	0.988401
HORVU0Hr1G035190	0.195931	0.876042
HORVU0Hr1G035200	-0.625348	0.666037
HORVU0Hr1G035230	0.315392	0.849758
HORVU0Hr1G035250	-0.656941	0.0860998
HORVU0Hr1G035260	-0.339272	0.788497
HORVU0Hr1G035270	-0.105329	0.928733
HORVU0Hr1G035280	0.822545	0.302249
HORVU0Hr1G035290	1.0123	0.165936
HORVU0Hr1G035300	0.0796473	0.968545
HORVU0Hr1G035310	0.659873	0.166153
HORVU0Hr1G035320	0.839938	0.16491
HORVU0Hr1G035340	0.967877	0.565771
HORVU0Hr1G035420	0	-
HORVU0Hr1G035430	0	-
HORVU0Hr1G035440	0	-
HORVU0Hr1G035460	-0.100202	0.930998
HORVU0Hr1G035470	-0.102291	0.924685
HORVU0Hr1G035530	-0.118315	0.918014
HORVU0Hr1G035540	0	-
HORVU0Hr1G035560	-0.122068	0.669681
HORVU0Hr1G035570	0	-
[truncated: 37,842 more rows]

## Sheet: lb_win1-ls_win1
gene	log2(FC)	FDR
AGP50735	0.413568	0.337278
AGP50736	-1.3913	0.121293
AGP50737	0.459439	0.243345
AGP50738	0.342478	0.751274
AGP50739	-0.084888	0.957093
AGP50740	0.326341	0.146579
AGP50741	0.144724	0.585503
AGP50742	-1.55165	0.172564
AGP50743	0.851061	0.234646
AGP50744	-0.334575	0.805821
AGP50745	-1.18844	0.0654246
AGP50746	-0.367412	0.605237
AGP50747	-0.610521	0.393508
AGP50748	-1.34232	0.0717899
AGP50749	-0.452706	0.421544
AGP50750	0.354551	0.591687
AGP50751	0.717644	0.0856525
AGP50752	0.304909	0.42922
AGP50753	0.231575	0.403134
AGP50754	0.349285	0.239045
AGP50755	0.494085	0.19227
AGP50756	-0.473773	0.414878
AGP50757	-1.03776	0.163211
AGP50758	0.308481	0.592108
AGP50759	0.161462	0.760151
AGP50760	0.614991	0.202471
AGP50761	0.176342	0.780537
AGP50762	0.219248	0.747384
AGP50763	0.30748	0.663179
AGP50764	0	-
AGP50765	-0.302335	0.659931
AGP50766	-0.447965	0.547555
AGP50767	-0.124567	0.834334
AGP50768	0.402945	0.337255
AGP50769	-0.71989	0.210752
AGP50770	-0.256123	0.662332
AGP50771	-0.0587779	0.931674
AGP50772	0.606953	0.639531
AGP50773	-0.643165	0.51202
AGP50774	-0.507008	0.631214
AGP50775	0.0445265	0.967886
AGP50776	0.241396	0.853254
AGP50777	-0.364011	0.584829
AGP50779	0.525405	0.23168
AGP50780	0.215407	0.542645
AGP50781	-1.15226	0.178279
AGP50782	-0.387647	0.580002
AGP50783	0.355751	0.402923
AGP50784	0.291184	0.359339
AGP50785	0.255824	0.503844
AGP50786	-0.924376	0.089803
AGP50787	-0.579013	0.303715
AGP50788	-2.14136	0.031538
AGP50789	-0.433554	0.506123
AGP50790	-0.457855	0.549901
AGP50791	-0.441443	0.564645
AGP50792	-0.588505	0.328726
AGP50793	-1.05568	0.147974
AGP50794	-0.46606	0.469627
AGP50795	-0.765919	0.0951607
AGP50796	-0.582803	0.347194
AGP50797	-0.821258	0.316252
AGP50798	-0.904215	0.0466894
AGP50799	-0.105038	0.767594
AGP50800	-0.637476	0.646745
AGP50801	0.443545	0.176629
AGP50802	-1.01424	0.0906299
AGP50803	-0.529155	0.696629
AGP50804	0.357025	0.635342
AGP50805	-0.0665765	0.93842
AGP50806	0.541148	0.117762
AGP50807	-1.38344	0.154685
AGP50808	-1.82371	0.0272037
AGP50809	-0.970851	0.146703
AGP50810	-0.528008	0.551001
EPlHVUG00000039848	0	-
EPlHVUG00000039849	-0.621215	0.395225
EPlHVUG00000039850	-0.919456	0.103765
EPlHVUG00000039851	-1.45546	0.0383308
EPlHVUG00000039852	-0.771476	0.34288
EPlHVUG00000039853	-0.949509	0.0943772
EPlHVUG00000039855	0	-
EPlHVUG00000039856	-1.02864	0.06318
EPlHVUG00000039857	-1.3662	0.279798
EPlHVUG00000039858	0	-
EPlHVUG00000039861	-0.49114	0.59061
EPlHVUG00000039863	-0.252053	0.646745
EPlHVUG00000039864	-0.531489	0.378906
EPlHVUG00000039865	0	-
EPlHVUG00000039867	-0.725873	0.295171
EPlHVUG00000039869	0	-
EPlHVUG00000039870	-0.555582	0.461037
EPlHVUG00000039871	-0.536079	0.339323
EPlHVUG00000039873	-0.206606	0.864183
EPlHVUG00000039875	-0.509748	0.457818
EPlHVUG00000039877	0	-
EPlHVUG00000039878	0	-
EPlHVUG00000039879	-0.357132	0.398404
EPlHVUG00000039880	-0.787055	0.250858
EPlHVUG00000039881	-0.665593	0.237357
EPlHVUG00000039882	0	-
EPlHVUG00000039883	0.254246	0.869153
EPlHVUG00000039888	-0.568864	0.556123
EPlHVUG00000039890	-1.14383	0.141921
EPlHVUG00000039891	-0.35366	0.599236
EPlHVUG00000039893	-0.787055	0.250858
EPlHVUG00000039894	0	-
HORVU0Hr1G000020	-0.0327717	0.924991
HORVU0Hr1G000030	-0.0327717	0.924967
HORVU0Hr1G000050	0.731532	0.117762
HORVU0Hr1G000080	0.404643	0.157199
HORVU0Hr1G000100	-0.256733	0.581108
HORVU0Hr1G000120	0	-
HORVU0Hr1G000130	0.456668	0.686367
HORVU0Hr1G000160	0.682714	0.0385736
HORVU0Hr1G000200	-0.0224392	0.966143
HORVU0Hr1G000230	0	-
HORVU0Hr1G000250	-0.41036	0.408332
HORVU0Hr1G000270	0.819873	0.0363127
HORVU0Hr1G000280	0.465773	0.170703
HORVU0Hr1G000290	0	-
HORVU0Hr1G000300	0	-
HORVU0Hr1G000320	-2.0343	0.000641532
HORVU0Hr1G000340	-2.95299	0.0152906
HORVU0Hr1G000350	0.623894	0.343441
HORVU0Hr1G000360	-0.350838	0.710625
HORVU0Hr1G000370	-0.569467	0.245796
HORVU0Hr1G000390	-0.918781	0.0241763
HORVU0Hr1G000410	-0.00768688	0.974152
HORVU0Hr1G000420	0.540954	0.495657
HORVU0Hr1G000430	0.263688	0.76162
HORVU0Hr1G000450	0.3181	0.344744
HORVU0Hr1G000490	1.10693	0.00383151
HORVU0Hr1G000500	0	-
HORVU0Hr1G000510	0.533264	0.129882
HORVU0Hr1G000600	0.0242441	0.902784
HORVU0Hr1G000620	-3.02872	0.00189854
HORVU0Hr1G000630	-0.568063	0.0171354
HORVU0Hr1G000640	0	-
HORVU0Hr1G000650	-1.95044	0.029524
HORVU0Hr1G000660	-1.25713	0.000892318
HORVU0Hr1G000670	-1.86362	0.016606
HORVU0Hr1G000710	-0.500699	0.0120703
HORVU0Hr1G000720	0	-
HORVU0Hr1G000730	0	-
HORVU0Hr1G000740	0	-
HORVU0Hr1G000760	-1.13747	0.505746
HORVU0Hr1G000780	-3.64627	0.0295043
HORVU0Hr1G000810	-1.9276	0.444167
HORVU0Hr1G000840	-0.656764	0.475543
HORVU0Hr1G000850	-1.52178	0.254413
HORVU0Hr1G000890	-1.6692	0.0356851
HORVU0Hr1G000900	-1.21013	0.0869341
HORVU0Hr1G000910	-2.20161	0.000609242
HORVU0Hr1G000930	0.120554	0.409392
HORVU0Hr1G000940	0.353898	0.218932
HORVU0Hr1G000950	1.33974	0.0145743
HORVU0Hr1G000960	0.923794	0.0622731
HORVU0Hr1G000990	-1.09871	0.165078
HORVU0Hr1G001040	-0.0853904	0.952412
HORVU0Hr1G001050	0.217539	0.371968
HORVU0Hr1G001070	0.708281	0.112298
HORVU0Hr1G001110	-1.1758	0.128076
HORVU0Hr1G001120	0.068494	0.890805
HORVU0Hr1G001140	0	-
HORVU0Hr1G001150	0	-
HORVU0Hr1G001160	1.01605	0.0447643
HORVU0Hr1G001170	1.36205	0.0016865
HORVU0Hr1G001180	0.134958	0.576364
HORVU0Hr1G001190	-0.281569	0.625318
HORVU0Hr1G001200	0	-
HORVU0Hr1G001230	0.531432	0.190517
HORVU0Hr1G001240	-0.288893	0.442109
HORVU0Hr1G001270	0.144149	0.707878
HORVU0Hr1G001280	0.811219	0.141309
HORVU0Hr1G001300	0.2071	0.400655
HORVU0Hr1G001340	0.219568	0.375497
HORVU0Hr1G001350	-0.476424	0.0951607
HORVU0Hr1G001370	-0.163298	0.659723
HORVU0Hr1G001390	0.307456	0.387954
HORVU0Hr1G001400	-0.169491	0.378906
HORVU0Hr1G001420	0.598347	0.257486
HORVU0Hr1G001430	-0.726932	0.520483
HORVU0Hr1G001440	0.556915	0.0135317
HORVU0Hr1G001450	0.489634	0.0821419
HORVU0Hr1G001460	-0.706145	0.012464
HORVU0Hr1G001470	0	-
HORVU0Hr1G001480	-3.5011	0.0297094
HORVU0Hr1G001490	1.49271	0.00395426
HORVU0Hr1G001500	-0.00127097	0.99773
HORVU0Hr1G001510	0.271023	0.341341
HORVU0Hr1G001520	0	-
HORVU0Hr1G001530	-0.401261	0.257182
HORVU0Hr1G001570	0.16526	0.42131
HORVU0Hr1G001580	0.549693	0.280375
HORVU0Hr1G001600	-1.7612	0.00273152
HORVU0Hr1G001610	0	-
HORVU0Hr1G001630	0.166065	0.589014
HORVU0Hr1G001640	0.0150349	0.972732
HORVU0Hr1G001680	0.888092	0.301822
HORVU0Hr1G001690	0.643319	0.309748
HORVU0Hr1G001750	-0.214076	0.360318
HORVU0Hr1G001760	0.754772	0.0182252
HORVU0Hr1G001770	0	-
HORVU0Hr1G001780	0	-
HORVU0Hr1G001800	-2.66162	0.123225
HORVU0Hr1G001810	0	-
HORVU0Hr1G001820	0	-
HORVU0Hr1G001840	-1.86731	0.0289975
HORVU0Hr1G001870	0	-
HORVU0Hr1G001880	0	-
HORVU0Hr1G001900	0	-
HORVU0Hr1G001920	0	-
HORVU0Hr1G001960	0	-
HORVU0Hr1G001980	0	-
HORVU0Hr1G002020	-0.180803	0.827762
HORVU0Hr1G002030	0	-
HORVU0Hr1G002040	0	-
HORVU0Hr1G002060	0	-
HORVU0Hr1G002080	0.536263	0.733807
HORVU0Hr1G002090	-1.43042	0.169519
HORVU0Hr1G002110	-0.367278	0.714441
HORVU0Hr1G002120	-0.54458	0.594935
HORVU0Hr1G002220	0.0254058	0.913895
HORVU0Hr1G002250	-0.0139339	0.987857
HORVU0Hr1G002270	0	-
HORVU0Hr1G002290	0	-
HORVU0Hr1G002300	0.0678211	0.952085
HORVU0Hr1G002320	0	-
HORVU0Hr1G002340	0.585353	0.0750325
HORVU0Hr1G002360	0	-
HORVU0Hr1G002390	-0.89502	0.487944
HORVU0Hr1G002410	-0.724713	0.560655
HORVU0Hr1G002450	0	-
HORVU0Hr1G002460	0	-
HORVU0Hr1G002480	0.465299	0.475543
HORVU0Hr1G002500	0.780924	0.162684
HORVU0Hr1G002520	0.154668	0.795094
HORVU0Hr1G002530	1.12111	0.0858659
HORVU0Hr1G002580	-3.2769	0.000535105
HORVU0Hr1G002600	1.5264	0.00166195
HORVU0Hr1G002620	0	-
HORVU0Hr1G002630	0	-
HORVU0Hr1G002640	-1.56068	0.187924
HORVU0Hr1G002680	-0.570333	0.0138655
HORVU0Hr1G002690	0.0376316	0.957535
HORVU0Hr1G002710	0.267608	0.853807
HORVU0Hr1G002720	-0.370806	0.0816147
HORVU0Hr1G002730	-0.228268	0.306009
HORVU0Hr1G002760	0	-
HORVU0Hr1G002770	0	-
HORVU0Hr1G002800	0	-
HORVU0Hr1G002810	0	-
HORVU0Hr1G002840	0	-
HORVU0Hr1G002870	1.0575	0.519138
HORVU0Hr1G002880	0	-
HORVU0Hr1G002920	-0.804182	0.199432
HORVU0Hr1G002930	0.317053	0.742925
HORVU0Hr1G002940	-0.537763	0.645422
HORVU0Hr1G002950	-0.331011	0.549149
HORVU0Hr1G002960	0.33492	0.311224
HORVU0Hr1G002990	-0.403341	0.657244
HORVU0Hr1G003000	0.298908	0.399855
HORVU0Hr1G003010	-0.718394	0.0636607
HORVU0Hr1G003020	0.296554	0.108713
HORVU0Hr1G003030	0	-
HORVU0Hr1G003040	-0.510666	0.0213623
HORVU0Hr1G003080	1.72134	0.172852
HORVU0Hr1G003110	-2.93085	0.00975419
HORVU0Hr1G003140	0	-
HORVU0Hr1G003170	0	-
HORVU0Hr1G003180	0	-
HORVU0Hr1G003190	0.919962	0.162495
HORVU0Hr1G003200	0.299268	0.477246
HORVU0Hr1G003210	-0.312122	0.506131
HORVU0Hr1G003220	-0.85263	0.304278
HORVU0Hr1G003230	-0.0817608	0.871057
HORVU0Hr1G003260	-0.502598	0.211847
HORVU0Hr1G003270	1.30732	0.00791954
HORVU0Hr1G003280	-0.13913	0.927384
HORVU0Hr1G003300	0	-
HORVU0Hr1G003320	0.207472	0.780537
HORVU0Hr1G003330	-0.173757	0.69441
HORVU0Hr1G003340	-0.0871031	0.893985
HORVU0Hr1G003380	0.208393	0.263304
HORVU0Hr1G003440	0.740044	0.11592
HORVU0Hr1G003480	-1.09667	0.482577
HORVU0Hr1G003490	0.0912073	0.746921
HORVU0Hr1G003520	0	-
HORVU0Hr1G003540	0.0236607	0.926999
HORVU0Hr1G003660	-0.571533	0.357576
HORVU0Hr1G003700	0	-
HORVU0Hr1G003720	0.322967	0.792983
HORVU0Hr1G003770	0	-
HORVU0Hr1G003790	0	-
HORVU0Hr1G003810	1.98556	0.00567257
HORVU0Hr1G003840	0	-
HORVU0Hr1G003850	0.686611	0.326582
HORVU0Hr1G003870	0.0574826	0.891175
HORVU0Hr1G003880	0	-
HORVU0Hr1G003890	1.75403	0.0201517
HORVU0Hr1G003900	-1.09211	0.131749
HORVU0Hr1G003910	-0.136354	0.803948
HORVU0Hr1G003920	-3.66595	0.00410857
HORVU0Hr1G003930	0.589043	0.550775
HORVU0Hr1G003950	-0.314917	0.708758
HORVU0Hr1G003980	0.491299	0.624702
HORVU0Hr1G004040	-1.04705	0.0544656
HORVU0Hr1G004060	0.294467	0.610471
HORVU0Hr1G004120	-0.0764617	0.805915
HORVU0Hr1G004130	0.207109	0.466893
HORVU0Hr1G004140	0	-
HORVU0Hr1G004150	-0.894336	0.0108567
HORVU0Hr1G004160	-0.103278	0.793416
HORVU0Hr1G004200	0.331851	0.198793
HORVU0Hr1G004250	0	-
HORVU0Hr1G004270	-0.196089	0.586934
HORVU0Hr1G004300	0.279024	0.680865
HORVU0Hr1G004320	-0.309423	0.627547
HORVU0Hr1G004330	0.323782	0.238778
HORVU0Hr1G004350	-0.202084	0.544108
HORVU0Hr1G004380	0	-
HORVU0Hr1G004400	-0.124044	0.699503
HORVU0Hr1G004410	-5.48063	0.000938765
HORVU0Hr1G004420	-0.0912403	0.716768
HORVU0Hr1G004430	-0.164772	0.427694
HORVU0Hr1G004470	-1.02127	0.0225562
HORVU0Hr1G004480	-0.675436	0.0583467
HORVU0Hr1G004510	0.434523	0.49907
HORVU0Hr1G004530	0	-
HORVU0Hr1G004610	0	-
HORVU0Hr1G004630	0	-
HORVU0Hr1G004640	0	-
HORVU0Hr1G004650	-4.07193	0.0172289
HORVU0Hr1G004670	-2.45657	0.0220882
HORVU0Hr1G004680	0	-
HORVU0Hr1G004690	-0.632336	0.298398
HORVU0Hr1G004700	0.195667	0.667403
HORVU0Hr1G004730	-0.0937749	0.929125
HORVU0Hr1G004740	-0.203769	0.836992
HORVU0Hr1G004750	0	-
HORVU0Hr1G004790	-0.13036	0.661141
HORVU0Hr1G004800	-0.00806405	0.990762
HORVU0Hr1G004830	1.20304	0.0520799
HORVU0Hr1G004850	0.0763875	0.927504
HORVU0Hr1G004870	-0.543618	0.197697
HORVU0Hr1G004890	-1.34731	0.149456
HORVU0Hr1G004900	0	-
HORVU0Hr1G004910	-0.587761	0.562124
HORVU0Hr1G004960	-0.226479	0.289514
HORVU0Hr1G004970	0.132589	0.430648
HORVU0Hr1G004980	-0.547524	0.292816
HORVU0Hr1G004990	0.315358	0.384482
HORVU0Hr1G005000	-0.389063	0.295188
HORVU0Hr1G005010	0	-
HORVU0Hr1G005020	0.258521	0.501428
HORVU0Hr1G005050	-2.25141	0.00723082
HORVU0Hr1G005060	-5.24836	0.000725593
HORVU0Hr1G005070	0.103362	0.836992
HORVU0Hr1G005090	0	-
HORVU0Hr1G005100	1.81862	0.0269024
HORVU0Hr1G005120	0	-
HORVU0Hr1G005130	0	-
HORVU0Hr1G005140	0.747427	0.11492
HORVU0Hr1G005150	-3.91703	0.000611166
HORVU0Hr1G005160	0.899996	0.245723
HORVU0Hr1G005180	0	-
HORVU0Hr1G005200	0	-
HORVU0Hr1G005210	-0.231101	0.867178
HORVU0Hr1G005230	-0.837389	0.164755
HORVU0Hr1G005240	-0.627417	0.319814
HORVU0Hr1G005250	0	-
HORVU0Hr1G005260	-0.207993	0.705435
HORVU0Hr1G005290	-0.164229	0.678358
HORVU0Hr1G005300	0.106644	0.963406
HORVU0Hr1G005320	-3.56107	0.000321262
HORVU0Hr1G005330	-0.229314	0.658254
HORVU0Hr1G005350	-2.66149	0.0273001
HORVU0Hr1G005360	-1.10393	0.419336
HORVU0Hr1G005380	-0.90627	0.0886251
HORVU0Hr1G005400	-0.366748	0.681859
HORVU0Hr1G005410	0	-
HORVU0Hr1G005420	-2.22673	0.0200292
HORVU0Hr1G005430	-1.36778	0.0644247
HORVU0Hr1G005480	0	-
HORVU0Hr1G005490	0	-
HORVU0Hr1G005500	-0.257471	0.639458
HORVU0Hr1G005510	0.584555	0.179322
HORVU0Hr1G005520	-0.298767	0.493864
HORVU0Hr1G005540	0.0542709	0.966593
HORVU0Hr1G005550	-0.11551	0.933677
HORVU0Hr1G005560	0	-
HORVU0Hr1G005570	0.841056	0.00425324
HORVU0Hr1G005590	0	-
HORVU0Hr1G005600	0	-
HORVU0Hr1G005610	0	-
HORVU0Hr1G005620	0	-
HORVU0Hr1G005640	0	-
HORVU0Hr1G005660	0	-
HORVU0Hr1G005670	-0.0915118	0.845944
HORVU0Hr1G005680	0	-
HORVU0Hr1G005690	0	-
HORVU0Hr1G005700	0	-
HORVU0Hr1G005720	0.252155	0.366183
HORVU0Hr1G005730	0	-
HORVU0Hr1G005750	1.78051	0.00102185
HORVU0Hr1G005770	-0.214655	0.515344
HORVU0Hr1G005790	0.19138	0.442476
HORVU0Hr1G005820	0.329579	0.294205
HORVU0Hr1G005840	-0.175415	0.67431
HORVU0Hr1G005850	0.0405301	0.96063
HORVU0Hr1G005860	-1.8866	0.0121696
HORVU0Hr1G005870	-0.817744	0.28105
HORVU0Hr1G005890	-0.751671	0.107871
HORVU0Hr1G005900	-0.758304	0.106137
HORVU0Hr1G005910	-0.802371	0.251896
HORVU0Hr1G005920	0.303722	0.154289
HORVU0Hr1G005960	-0.517976	0.0391338
HORVU0Hr1G005970	0	-
HORVU0Hr1G006020	0.163946	0.671026
HORVU0Hr1G006040	0.118418	0.80193
HORVU0Hr1G006050	1.10474	0.064823
HORVU0Hr1G006070	0.889734	0.0372774
HORVU0Hr1G006080	1.03097	0.0146381
HORVU0Hr1G006090	0	-
HORVU0Hr1G006100	0	-
HORVU0Hr1G006120	0	-
HORVU0Hr1G006130	0	-
HORVU0Hr1G006140	-1.05446	0.338363
HORVU0Hr1G006150	-0.0616443	0.956427
HORVU0Hr1G006160	-1.10487	0.32215
HORVU0Hr1G006170	0.48508	0.827702
HORVU0Hr1G006190	0.27865	0.348432
HORVU0Hr1G006210	0	-
HORVU0Hr1G006240	-0.41218	0.234385
HORVU0Hr1G006250	-0.127437	0.742247
HORVU0Hr1G006260	0	-
HORVU0Hr1G006270	0	-
HORVU0Hr1G006280	0	-
HORVU0Hr1G006290	-0.358765	0.82176
HORVU0Hr1G006300	0	-
HORVU0Hr1G006330	0	-
HORVU0Hr1G006340	0	-
HORVU0Hr1G006350	0.520216	0.190623
HORVU0Hr1G006360	0.803219	0.132333
HORVU0Hr1G006370	0	-
HORVU0Hr1G006380	0	-
HORVU0Hr1G006410	0.450149	0.404458
HORVU0Hr1G006420	-1.89919	0.0120525
HORVU0Hr1G006430	-1.76741	0.0136815
HORVU0Hr1G006440	0.461828	0.144311
HORVU0Hr1G006450	0	-
HORVU0Hr1G006460	0.469992	0.161171
HORVU0Hr1G006470	0	-
HORVU0Hr1G006520	0.332492	0.861782
HORVU0Hr1G006550	0	-
HORVU0Hr1G006560	0	-
HORVU0Hr1G006580	0	-
HORVU0Hr1G006600	0.300507	0.817839
HORVU0Hr1G006620	-0.298233	0.859571
HORVU0Hr1G006630	-0.264056	0.311378
HORVU0Hr1G006640	-0.317388	0.27013
HORVU0Hr1G006680	0.358131	0.359064
HORVU0Hr1G006720	0.298951	0.425968
HORVU0Hr1G006740	0.733091	0.0075836
HORVU0Hr1G006750	-0.423547	0.243345
HORVU0Hr1G006770	0	-
HORVU0Hr1G006790	0.786601	0.0356476
HORVU0Hr1G006800	-1.5382	0.00111164
HORVU0Hr1G006810	0	-
HORVU0Hr1G006830	0.534308	0.44418
HORVU0Hr1G006890	1.00701	0.297506
HORVU0Hr1G006920	0	-
HORVU0Hr1G006930	-0.0628661	0.877888
HORVU0Hr1G006940	-0.240307	0.835748
HORVU0Hr1G006950	0.141623	0.494638
HORVU0Hr1G006960	0.459578	0.0140698
HORVU0Hr1G006980	0.306133	0.806335
HORVU0Hr1G007000	-0.11974	0.669124
HORVU0Hr1G007020	-0.0943955	0.937406
HORVU0Hr1G007030	-0.355564	0.597547
HORVU0Hr1G007050	-1.41562	0.0585127
HORVU0Hr1G007070	0.192178	0.480835
HORVU0Hr1G007090	0	-
HORVU0Hr1G007100	0	-
HORVU0Hr1G007110	-0.574739	0.00771099
HORVU0Hr1G007130	-1.24995	0.271314
HORVU0Hr1G007150	0.164779	0.55882
HORVU0Hr1G007170	0	-
HORVU0Hr1G007190	0	-
HORVU0Hr1G007210	0	-
HORVU0Hr1G007220	0.23681	0.607864
HORVU0Hr1G007240	0	-
HORVU0Hr1G007260	0	-
HORVU0Hr1G007280	0	-
HORVU0Hr1G007320	0.40556	0.155535
HORVU0Hr1G007330	0	-
HORVU0Hr1G007340	3.29689	0.162886
HORVU0Hr1G007360	1.3939	0.00580732
HORVU0Hr1G007370	2.05729	0.198438
HORVU0Hr1G007380	-0.570035	0.127526
HORVU0Hr1G007410	0.505194	0.106731
HORVU0Hr1G007420	-0.212004	0.636282
HORVU0Hr1G007430	0	-
HORVU0Hr1G007450	3.31934	0.00458408
HORVU0Hr1G007460	-0.526802	0.143457
HORVU0Hr1G007470	-2.82068	0.154304
HORVU0Hr1G007480	0.327549	0.791356
HORVU0Hr1G007520	0	-
HORVU0Hr1G007540	0.170192	0.800107
HORVU0Hr1G007580	0	-
HORVU0Hr1G007620	0.947119	0.313522
HORVU0Hr1G007630	0.168031	0.80993
HORVU0Hr1G007640	0	-
HORVU0Hr1G007650	-0.206981	0.568782
HORVU0Hr1G007680	-0.0429997	0.947712
HORVU0Hr1G007690	-0.0430948	0.947569
HORVU0Hr1G007700	0.733441	0.00890422
HORVU0Hr1G007720	0	-
HORVU0Hr1G007730	0	-
HORVU0Hr1G007740	-1.96594	0.0520463
HORVU0Hr1G007760	-0.217693	0.812259
HORVU0Hr1G007770	1.21361	0.0433872
HORVU0Hr1G007790	0.576579	0.10986
HORVU0Hr1G007820	0.75691	0.012464
HORVU0Hr1G007830	-0.0144964	0.988126
HORVU0Hr1G007860	0.28293	0.479894
HORVU0Hr1G007870	0	-
HORVU0Hr1G007880	-0.589294	0.13699
HORVU0Hr1G007890	0.447485	0.13103
HORVU0Hr1G007930	0.0772859	0.845944
HORVU0Hr1G007960	-0.365351	0.559878
HORVU0Hr1G008030	-0.00893251	0.990662
HORVU0Hr1G008040	0.51185	0.391615
HORVU0Hr1G008050	-0.928988	0.411947
HORVU0Hr1G008060	0.211929	0.482979
HORVU0Hr1G008070	0.22522	0.436071
HORVU0Hr1G008080	0.150785	0.650477
HORVU0Hr1G008280	-0.22627	0.419628
HORVU0Hr1G008350	0	-
HORVU0Hr1G008360	0.382489	0.172099
HORVU0Hr1G008370	0	-
HORVU0Hr1G008390	0	-
HORVU0Hr1G008400	0	-
HORVU0Hr1G008470	-0.2231	0.371968
HORVU0Hr1G008550	0.456867	0.0370822
HORVU0Hr1G008580	0.198549	0.802918
HORVU0Hr1G008590	0.563624	0.0339474
HORVU0Hr1G008610	0	-
HORVU0Hr1G008620	-0.44089	0.0988067
HORVU0Hr1G008640	1.5248	0.00117457
HORVU0Hr1G008650	-0.62248	0.112784
HORVU0Hr1G008670	-0.512306	0.233937
HORVU0Hr1G008690	0.210528	0.645291
HORVU0Hr1G008700	-0.676124	0.0179135
HORVU0Hr1G008740	-0.745907	0.0727907
HORVU0Hr1G008750	0.0457195	0.947569
HORVU0Hr1G008780	-1.27481	0.029164
HORVU0Hr1G008790	-0.52393	0.113933
HORVU0Hr1G008800	0.0457195	0.947569
HORVU0Hr1G008810	0.103258	0.789131
HORVU0Hr1G008830	-0.33409	0.857784
HORVU0Hr1G008840	0.532249	0.248037
HORVU0Hr1G008850	-0.446683	0.488854
HORVU0Hr1G008860	-0.119776	0.649309
HORVU0Hr1G008870	-1.08176	0.00267247
HORVU0Hr1G008880	-0.377938	0.0423234
HORVU0Hr1G008920	-0.457818	0.395171
HORVU0Hr1G008940	0.271859	0.426444
HORVU0Hr1G008950	1.1237	0.364933
HORVU0Hr1G008960	2.48694	0.367755
HORVU0Hr1G008970	-0.211873	0.305752
HORVU0Hr1G008980	-0.0171402	0.968283
HORVU0Hr1G008990	0.0478148	0.953912
HORVU0Hr1G009030	0.335793	0.368706
HORVU0Hr1G009040	0.675692	0.0855073
HORVU0Hr1G009050	0.406693	0.365401
HORVU0Hr1G009060	-1.57979	0.0745129
HORVU0Hr1G009070	-0.137823	0.925396
HORVU0Hr1G009080	0.776818	0.00325434
HORVU0Hr1G009100	0	-
HORVU0Hr1G009120	-0.732472	0.40289
HORVU0Hr1G009140	0.0307975	0.947057
HORVU0Hr1G009150	0.043566	0.924118
HORVU0Hr1G009170	0.149691	0.658397
HORVU0Hr1G009180	0	-
HORVU0Hr1G009230	0	-
HORVU0Hr1G009250	0	-
HORVU0Hr1G009270	0	-
HORVU0Hr1G009280	-0.612192	0.391895
HORVU0Hr1G009310	0	-
HORVU0Hr1G009320	2.55577	0.0356851
HORVU0Hr1G009330	0	-
HORVU0Hr1G009340	2.55577	0.0356851
HORVU0Hr1G009350	2.55577	0.0356851
HORVU0Hr1G009370	1.58076	0.119007
HORVU0Hr1G009380	0.322391	0.388075
HORVU0Hr1G009390	3.93945	0.0499806
HORVU0Hr1G009400	1.75722	0.20069
HORVU0Hr1G009410	0.453546	0.822555
HORVU0Hr1G009420	1.94541	0.161071
HORVU0Hr1G009440	3.56924	0.0397741
HORVU0Hr1G009450	3.93858	0.0491264
HORVU0Hr1G009460	0.921776	0.187763
HORVU0Hr1G009470	3.34746	0.0431155
HORVU0Hr1G009480	-1.76001	0.0355528
HORVU0Hr1G009530	0.711102	0.310456
HORVU0Hr1G009540	0	-
HORVU0Hr1G009550	-0.0572818	0.832426
HORVU0Hr1G009560	-0.0759242	0.841305
HORVU0Hr1G009600	0	-
HORVU0Hr1G009680	-0.0667988	0.945291
HORVU0Hr1G009740	1.25713	0.110083
HORVU0Hr1G009770	0.472925	0.319013
HORVU0Hr1G009780	-0.035626	0.960303
HORVU0Hr1G009800	0	-
HORVU0Hr1G009840	0	-
HORVU0Hr1G009850	-2.03303	0.0011715
HORVU0Hr1G009860	-2.70933	0.00771099
HORVU0Hr1G009870	-0.199805	0.418771
HORVU0Hr1G009880	0	-
HORVU0Hr1G009900	-3.27375	0.055745
HORVU0Hr1G009910	0.405652	0.0521577
HORVU0Hr1G009930	0.0225128	0.982358
HORVU0Hr1G009960	0	-
HORVU0Hr1G009970	0	-
HORVU0Hr1G010000	-0.854675	0.0566831
HORVU0Hr1G010010	0.0188045	0.99006
HORVU0Hr1G010020	0.38224	0.228281
HORVU0Hr1G010040	-0.724678	0.239637
HORVU0Hr1G010050	-0.36522	0.527024
HORVU0Hr1G010070	0	-
HORVU0Hr1G010080	-1.25849	0.412765
HORVU0Hr1G010120	0	-
HORVU0Hr1G010160	-0.694663	0.525158
HORVU0Hr1G010170	-0.148844	0.635514
HORVU0Hr1G010180	0	-
HORVU0Hr1G010190	2.3191	0.059308
HORVU0Hr1G010200	-0.130856	0.912074
HORVU0Hr1G010210	0	-
HORVU0Hr1G010220	-1.10514	0.0130671
HORVU0Hr1G010230	0.0388289	0.927504
HORVU0Hr1G010240	0	-
HORVU0Hr1G010250	-1.23173	0.00844291
HORVU0Hr1G010260	-0.0497604	0.855574
HORVU0Hr1G010280	-0.120533	0.916456
HORVU0Hr1G010310	0	-
HORVU0Hr1G010330	0	-
HORVU0Hr1G010340	-1.57924	0.0175691
HORVU0Hr1G010350	1.77453	0.00921885
HORVU0Hr1G010360	0	-
HORVU0Hr1G010370	0	-
HORVU0Hr1G010390	0	-
HORVU0Hr1G010400	0	-
HORVU0Hr1G010410	0	-
HORVU0Hr1G010440	0	-
HORVU0Hr1G010460	-0.71264	0.584173
HORVU0Hr1G010470	0	-
HORVU0Hr1G010480	0	-
HORVU0Hr1G010490	0.343609	0.460976
HORVU0Hr1G010510	0.00137783	0.99773
HORVU0Hr1G010530	0.104092	0.802695
HORVU0Hr1G010590	0.191211	0.690112
HORVU0Hr1G010600	0	-
HORVU0Hr1G010630	-0.0101418	0.975924
HORVU0Hr1G010640	-0.920491	0.232248
HORVU0Hr1G010660	0.0101876	0.988815
HORVU0Hr1G010680	-1.02805	0.109891
HORVU0Hr1G010690	0	-
HORVU0Hr1G010700	0	-
HORVU0Hr1G010710	0	-
HORVU0Hr1G010750	-0.170524	0.482849
HORVU0Hr1G010760	-2.08723	0.0530096
HORVU0Hr1G010770	1.16334	0.0116782
HORVU0Hr1G010790	-0.19224	0.399484
HORVU0Hr1G010800	-0.70282	0.0407401
HORVU0Hr1G010810	0.32131	0.603267
HORVU0Hr1G010840	-0.277508	0.569698
HORVU0Hr1G010870	-0.509034	0.0165338
HORVU0Hr1G010880	-4.41358	0.0146767
HORVU0Hr1G010890	-0.742388	0.0377786
HORVU0Hr1G010900	-0.523086	0.181386
HORVU0Hr1G010910	-0.633853	0.323414
HORVU0Hr1G010920	-0.593553	0.145418
HORVU0Hr1G010940	1.21381	0.0434706
HORVU0Hr1G010970	0.285114	0.860845
HORVU0Hr1G010990	0	-
HORVU0Hr1G011010	0	-
HORVU0Hr1G011030	-0.235098	0.626572
HORVU0Hr1G011040	0.133756	0.937568
HORVU0Hr1G011050	0.0963739	0.948882
HORVU0Hr1G011110	-0.150172	0.878771
HORVU0Hr1G011140	-0.425667	0.565498
HORVU0Hr1G011150	-0.112736	0.911143
HORVU0Hr1G011280	0	-
HORVU0Hr1G011310	0.145668	0.4837
HORVU0Hr1G011320	0	-
HORVU0Hr1G011330	0.214191	0.548349
HORVU0Hr1G011420	0.295301	0.639458
HORVU0Hr1G011430	0.248616	0.688634
HORVU0Hr1G011440	0	-
HORVU0Hr1G011450	-0.499992	0.830141
HORVU0Hr1G011460	0.364828	0.242391
HORVU0Hr1G011480	-3.77415	0.00421896
HORVU0Hr1G011500	0	-
HORVU0Hr1G011510	-0.523067	0.415481
HORVU0Hr1G011520	-0.404334	0.790954
HORVU0Hr1G011560	-0.0286541	0.902321
HORVU0Hr1G011570	0.690404	0.0582623
HORVU0Hr1G011580	0	-
HORVU0Hr1G011600	0.510376	0.342872
HORVU0Hr1G011610	0	-
HORVU0Hr1G011620	0	-
HORVU0Hr1G011630	0	-
HORVU0Hr1G011650	0.0336665	0.967603
HORVU0Hr1G011660	-1.83852	0.106669
HORVU0Hr1G011670	0	-
HORVU0Hr1G011700	0	-
HORVU0Hr1G011720	-1.14089	0.411153
HORVU0Hr1G011730	0	-
HORVU0Hr1G011750	0.260669	0.54114
HORVU0Hr1G011760	0.631814	0.200692
HORVU0Hr1G011770	0	-
HORVU0Hr1G011840	-0.160029	0.593948
HORVU0Hr1G011860	-0.699493	0.0284061
HORVU0Hr1G011890	0	-
HORVU0Hr1G011940	-0.235737	0.459768
HORVU0Hr1G012050	-0.312423	0.46689
HORVU0Hr1G012080	0	-
HORVU0Hr1G012090	-0.124788	0.810224
HORVU0Hr1G012100	0	-
HORVU0Hr1G012130	-3.11779	0.00231823
HORVU0Hr1G012140	-1.49733	0.0101057
HORVU0Hr1G012160	0	-
HORVU0Hr1G012190	1.14608	0.013646
HORVU0Hr1G012220	0	-
HORVU0Hr1G012230	-1.61245	0.0131496
HORVU0Hr1G012260	-0.0220162	0.946815
HORVU0Hr1G012300	-0.196611	0.817821
HORVU0Hr1G012350	0	-
HORVU0Hr1G012370	-0.260303	0.437546
HORVU0Hr1G012390	-6.07436	0.00174871
HORVU0Hr1G012410	0.28378	0.249799
HORVU0Hr1G012460	1.23241	0.00611765
HORVU0Hr1G012490	-1.02547	0.0430487
HORVU0Hr1G012510	-0.359673	0.189876
HORVU0Hr1G012520	0.294479	0.309251
HORVU0Hr1G012530	0	-
HORVU0Hr1G012560	0	-
HORVU0Hr1G012570	0	-
HORVU0Hr1G012620	0.110273	0.615832
HORVU0Hr1G012630	-0.272939	0.450207
HORVU0Hr1G012670	0	-
HORVU0Hr1G012680	0	-
HORVU0Hr1G012710	0.0556863	0.939917
HORVU0Hr1G012740	-0.870151	0.387142
HORVU0Hr1G012750	-0.846391	0.41703
HORVU0Hr1G012780	0	-
HORVU0Hr1G012790	0	-
HORVU0Hr1G012820	-0.497629	0.575616
HORVU0Hr1G012850	0	-
HORVU0Hr1G012860	1.41248	0.00168751
HORVU0Hr1G012870	0.113711	0.902168
HORVU0Hr1G012890	0.0998636	0.771428
HORVU0Hr1G012910	-2.93139	0.0103704
HORVU0Hr1G012920	-0.338401	0.668769
HORVU0Hr1G012930	-1.61751	0.0842911
HORVU0Hr1G012940	1.60226	0.101476
HORVU0Hr1G012950	-1.00328	0.0112758
HORVU0Hr1G012970	-1.11099	0.074187
HORVU0Hr1G012990	-4.57571	0.00262512
HORVU0Hr1G013010	-1.14463	0.14999
HORVU0Hr1G013020	-1.4223	0.0576452
HORVU0Hr1G013030	0	-
HORVU0Hr1G013040	0.258911	0.409928
HORVU0Hr1G013060	-1.16722	0.11771
HORVU0Hr1G013070	-1.03432	0.199944
HORVU0Hr1G013080	0	-
HORVU0Hr1G013090	0.305347	0.494907
HORVU0Hr1G013110	0	-
HORVU0Hr1G013120	-0.107903	0.900955
HORVU0Hr1G013140	1.07562	0.0737101
HORVU0Hr1G013160	-0.604695	0.131749
HORVU0Hr1G013170	0.968062	0.123934
HORVU0Hr1G013180	0.181896	0.737724
HORVU0Hr1G013190	-0.786463	0.153217
HORVU0Hr1G013200	-0.57691	0.118274
HORVU0Hr1G013220	-0.766874	0.00887331
HORVU0Hr1G013240	0.823381	0.0535057
HORVU0Hr1G013250	0	-
HORVU0Hr1G013260	0.0568566	0.954642
HORVU0Hr1G013280	0	-
HORVU0Hr1G013290	-0.15911	0.646745
HORVU0Hr1G013310	0	-
HORVU0Hr1G013340	0.157991	0.680429
HORVU0Hr1G013350	-1.02476	0.105608
HORVU0Hr1G013380	-0.152309	0.798552
HORVU0Hr1G013390	-0.712108	0.0281664
HORVU0Hr1G013430	-0.788543	0.344633
HORVU0Hr1G013450	0	-
HORVU0Hr1G013460	0.110711	0.874298
HORVU0Hr1G013470	0	-
HORVU0Hr1G013490	0	-
HORVU0Hr1G013510	0.00185084	0.996329
HORVU0Hr1G013610	0	-
HORVU0Hr1G013660	-0.475747	0.394196
HORVU0Hr1G013680	-0.0417635	0.951593
HORVU0Hr1G013700	0.246744	0.635681
HORVU0Hr1G013720	5.34431	0.022381
HORVU0Hr1G013740	0.543391	0.543522
HORVU0Hr1G013750	-1.03604	0.0169067
HORVU0Hr1G013760	-2.07181	0.0188847
HORVU0Hr1G013770	-0.0335326	0.943489
HORVU0Hr1G013780	0.403151	0.574339
HORVU0Hr1G013800	0.932354	0.115436
HORVU0Hr1G013830	1.06096	0.00450372
HORVU0Hr1G013850	0.0683737	0.793332
HORVU0Hr1G013870	0.117881	0.802587
HORVU0Hr1G013890	1.29881	0.00252833
HORVU0Hr1G013900	1.39859	0.00204838
HORVU0Hr1G013910	1.20217	0.0751583
HORVU0Hr1G013920	0	-
HORVU0Hr1G013930	0	-
HORVU0Hr1G013940	0	-
HORVU0Hr1G013950	0	-
HORVU0Hr1G013960	0	-
HORVU0Hr1G014000	0	-
HORVU0Hr1G014020	0	-
HORVU0Hr1G014030	-2.03539	0.00111565
HORVU0Hr1G014040	-2.70933	0.00771099
HORVU0Hr1G014050	-0.285703	0.228551
HORVU0Hr1G014060	-0.0356264	0.960233
HORVU0Hr1G014070	0.0513917	0.848204
HORVU0Hr1G014080	0	-
HORVU0Hr1G014100	0.0117571	0.993806
HORVU0Hr1G014110	-0.462935	0.347958
HORVU0Hr1G014120	0	-
HORVU0Hr1G014140	0	-
HORVU0Hr1G014150	-0.206346	0.507026
HORVU0Hr1G014170	0.641584	0.141496
HORVU0Hr1G014190	0	-
HORVU0Hr1G014200	0.230601	0.729049
HORVU0Hr1G014210	0.101432	0.648093
HORVU0Hr1G014220	0.0577491	0.801477
HORVU0Hr1G014230	0	-
HORVU0Hr1G014240	0.121255	0.588568
HORVU0Hr1G014250	0.575326	0.547687
HORVU0Hr1G014260	0	-
HORVU0Hr1G014270	-0.317776	0.372908
HORVU0Hr1G014280	0	-
HORVU0Hr1G014290	0	-
HORVU0Hr1G014300	0	-
HORVU0Hr1G014360	-1.3047	0.294547
HORVU0Hr1G014370	0	-
HORVU0Hr1G014390	0	-
HORVU0Hr1G014400	-1.75038	0.0112035
HORVU0Hr1G014450	-0.548356	0.68151
HORVU0Hr1G014460	-0.193385	0.698067
HORVU0Hr1G014490	0	-
HORVU0Hr1G014500	0	-
HORVU0Hr1G014510	-0.56975	0.370109
HORVU0Hr1G014520	0	-
HORVU0Hr1G014540	0	-
HORVU0Hr1G014570	0	-
HORVU0Hr1G014580	0	-
HORVU0Hr1G014620	0	-
HORVU0Hr1G014630	1.52808	0.00482106
HORVU0Hr1G014650	0.857701	0.524858
HORVU0Hr1G014660	0	-
HORVU0Hr1G014720	-2.38303	0.247221
HORVU0Hr1G014750	-2.23202	0.349456
HORVU0Hr1G014760	0	-
HORVU0Hr1G014770	0	-
HORVU0Hr1G014780	0.420312	0.364523
HORVU0Hr1G014790	0.196719	0.600854
HORVU0Hr1G014810	-0.0104192	0.991396
HORVU0Hr1G014840	0.685788	0.261241
HORVU0Hr1G014880	0.744199	0.314641
HORVU0Hr1G014900	-2.18619	0.00147785
HORVU0Hr1G014940	0.539202	0.110108
HORVU0Hr1G014950	0.656516	0.342467
HORVU0Hr1G014960	-0.0122165	0.975189
HORVU0Hr1G014980	0	-
HORVU0Hr1G015030	-0.232631	0.594836
HORVU0Hr1G015050	0.015277	0.960782
HORVU0Hr1G015090	-0.662946	0.250858
HORVU0Hr1G015130	0	-
HORVU0Hr1G015160	-0.156497	0.760721
HORVU0Hr1G015180	-0.703593	0.172704
HORVU0Hr1G015190	0	-
HORVU0Hr1G015210	0	-
HORVU0Hr1G015220	-0.550745	0.221239
HORVU0Hr1G015230	-0.952226	0.0109773
HORVU0Hr1G015260	0.351768	0.421682
HORVU0Hr1G015270	0	-
HORVU0Hr1G015280	0	-
HORVU0Hr1G015290	0	-
HORVU0Hr1G015300	0	-
HORVU0Hr1G015360	0	-
HORVU0Hr1G015370	-6.33945	0.00144511
HORVU0Hr1G015380	0.784461	0.00736255
HORVU0Hr1G015390	-1.03304	0.106043
HORVU0Hr1G015410	0.668122	0.531229
HORVU0Hr1G015420	2.0732	0.00566223
HORVU0Hr1G015440	0.713277	0.222937
HORVU0Hr1G015450	-0.0319024	0.897817
HORVU0Hr1G015470	0	-
HORVU0Hr1G015500	0	-
HORVU0Hr1G015510	0.00847263	0.991037
HORVU0Hr1G015520	0.828498	0.026015
HORVU0Hr1G015530	0.466472	0.360588
HORVU0Hr1G015560	-0.726551	0.0431441
HORVU0Hr1G015570	1.27824	0.159665
HORVU0Hr1G015590	0	-
HORVU0Hr1G015600	0	-
HORVU0Hr1G015630	0.490985	0.237103
HORVU0Hr1G015650	-2.41084	0.00330265
HORVU0Hr1G015660	0	-
HORVU0Hr1G015680	0.539502	0.695912
HORVU0Hr1G015700	0.0647696	0.832356
HORVU0Hr1G015710	-0.0405953	0.893815
HORVU0Hr1G015750	0.180349	0.471018
HORVU0Hr1G015760	0	-
HORVU0Hr1G015770	-0.136614	0.495104
HORVU0Hr1G015780	-4.17999	0.000516922
HORVU0Hr1G015810	-1.20681	0.00267532
HORVU0Hr1G015820	-0.547806	0.206254
HORVU0Hr1G015830	0.257389	0.305152
HORVU0Hr1G015840	0.542684	0.346044
HORVU0Hr1G015850	0	-
HORVU0Hr1G015860	0.453425	0.628103
HORVU0Hr1G015890	-1.01291	0.0188322
HORVU0Hr1G015910	0	-
HORVU0Hr1G015930	-0.793843	0.268466
HORVU0Hr1G015950	0.336157	0.457874
HORVU0Hr1G015960	0.0339129	0.929439
HORVU0Hr1G015970	-0.0951743	0.945261
HORVU0Hr1G015980	0	-
HORVU0Hr1G015990	0.171106	0.802708
HORVU0Hr1G016000	-0.252575	0.512038
HORVU0Hr1G016020	0	-
HORVU0Hr1G016040	-1.67231	0.462756
HORVU0Hr1G016050	-0.096915	0.714441
HORVU0Hr1G016060	0	-
HORVU0Hr1G016130	0	-
HORVU0Hr1G016140	0	-
HORVU0Hr1G016150	0.688368	0.00309237
HORVU0Hr1G016170	-1.79272	0.0134164
HORVU0Hr1G016180	1.13396	0.00346464
HORVU0Hr1G016190	0.0421455	0.890072
HORVU0Hr1G016220	0	-
HORVU0Hr1G016230	0	-
HORVU0Hr1G016250	0.805086	0.0330896
HORVU0Hr1G016310	-0.195918	0.905154
HORVU0Hr1G016330	-1.6084	0.0722477
HORVU0Hr1G016340	-0.413205	0.143489
HORVU0Hr1G016350	0.67986	0.602325
HORVU0Hr1G016360	0.105807	0.71636
HORVU0Hr1G016370	-0.337911	0.81077
HORVU0Hr1G016380	0	-
HORVU0Hr1G016410	-3.72748	0.0408925
HORVU0Hr1G016420	0	-
HORVU0Hr1G016430	-1.73336	0.00357161
HORVU0Hr1G016450	0.189589	0.518786
HORVU0Hr1G016470	0	-
HORVU0Hr1G016480	-3.76734	0.00370104
HORVU0Hr1G016510	0.418639	0.447083
HORVU0Hr1G016530	0	-
HORVU0Hr1G016540	1.74072	0.454538
HORVU0Hr1G016560	1.3464	0.00042367
HORVU0Hr1G016570	0	-
HORVU0Hr1G016590	0.639913	0.273478
HORVU0Hr1G016610	0.895062	0.147287
HORVU0Hr1G016630	0.291827	0.425001
HORVU0Hr1G016640	0.0618571	0.916003
HORVU0Hr1G016650	0.532679	0.148885
HORVU0Hr1G016660	-1.27479	0.000779819
HORVU0Hr1G016680	-4.03795	0.00107938
HORVU0Hr1G016690	0	-
HORVU0Hr1G016700	-0.402287	0.261844
HORVU0Hr1G016720	0.378105	0.207921
HORVU0Hr1G016780	1.86246	0.0475018
HORVU0Hr1G016820	-0.288051	0.373002
HORVU0Hr1G016830	0	-
HORVU0Hr1G016840	0.044013	0.920209
HORVU0Hr1G016860	1.55329	0.00430644
HORVU0Hr1G016880	0.0308437	0.929672
HORVU0Hr1G016890	-0.690989	0.201567
HORVU0Hr1G016920	0.0344979	0.876075
HORVU0Hr1G016930	-0.0204492	0.944139
HORVU0Hr1G016940	0.630827	0.128698
HORVU0Hr1G016950	0	-
HORVU0Hr1G016960	-0.00761399	0.974825
HORVU0Hr1G016970	0	-
HORVU0Hr1G016980	0	-
HORVU0Hr1G017000	1.15418	0.307548
HORVU0Hr1G017010	0	-
HORVU0Hr1G017020	-0.184116	0.321901
HORVU0Hr1G017050	0.0887043	0.833666
HORVU0Hr1G017060	0	-
HORVU0Hr1G017070	0.360278	0.489885
HORVU0Hr1G017080	-0.946837	0.0265022
HORVU0Hr1G017090	0.474395	0.161
HORVU0Hr1G017100	-0.157876	0.571305
HORVU0Hr1G017110	0.875054	0.525853
HORVU0Hr1G017120	0.339695	0.0900573
HORVU0Hr1G017130	1.38122	0.0250959
HORVU0Hr1G017140	0.553866	0.0885141
HORVU0Hr1G017160	-1.56301	0.00884401
HORVU0Hr1G017170	0.362083	0.357242
HORVU0Hr1G017180	0.108252	0.90246
HORVU0Hr1G017200	-0.256087	0.729674
HORVU0Hr1G017210	0.135289	0.657989
HORVU0Hr1G017220	-5.1296	0.00311095
HORVU0Hr1G017230	1.2636	0.169065
HORVU0Hr1G017240	0	-
HORVU0Hr1G017250	0.0871091	0.85565
HORVU0Hr1G017260	0.0917228	0.801269
HORVU0Hr1G017270	-0.113511	0.858199
HORVU0Hr1G017280	0	-
HORVU0Hr1G017290	0	-
HORVU0Hr1G017320	0.340286	0.453467
HORVU0Hr1G017330	-1.24451	0.0695408
HORVU0Hr1G017350	0	-
HORVU0Hr1G017360	-0.166734	0.586592
HORVU0Hr1G017370	0.368669	0.168881
HORVU0Hr1G017380	1.01916	0.066997
HORVU0Hr1G017400	0.659062	0.261525
HORVU0Hr1G017440	-0.147091	0.541946
HORVU0Hr1G017450	0.0429363	0.837177
HORVU0Hr1G017480	0.177977	0.75231
HORVU0Hr1G017490	-4.50724	0.00127399
HORVU0Hr1G017510	0.0431858	0.912074
HORVU0Hr1G017530	0.104166	0.921453
HORVU0Hr1G017540	0.564619	0.0891066
HORVU0Hr1G017560	1.38362	0.0286123
HORVU0Hr1G017570	1.4034	0.0290371
HORVU0Hr1G017610	0	-
HORVU0Hr1G017620	-0.00255999	0.992703
HORVU0Hr1G017670	0.861247	0.348023
HORVU0Hr1G017680	0.552505	0.0483624
HORVU0Hr1G017690	1.23012	0.0608516
HORVU0Hr1G017710	0	-
HORVU0Hr1G017720	0	-
HORVU0Hr1G017740	0.526156	0.184364
HORVU0Hr1G017750	0.505689	0.242319
HORVU0Hr1G017760	0	-
HORVU0Hr1G017790	-0.222398	0.661408
HORVU0Hr1G017800	-0.613892	0.0431
HORVU0Hr1G017830	0	-
HORVU0Hr1G017840	0	-
HORVU0Hr1G017850	0	-
HORVU0Hr1G017940	-0.721217	0.149192
HORVU0Hr1G017950	0	-
HORVU0Hr1G017960	-0.0746117	0.903918
HORVU0Hr1G017970	0.364871	0.298832
HORVU0Hr1G018000	0.235935	0.487203
HORVU0Hr1G018020	0	-
HORVU0Hr1G018030	0	-
HORVU0Hr1G018040	0	-
HORVU0Hr1G018050	0.351763	0.590796
HORVU0Hr1G018060	0.4058	0.277505
HORVU0Hr1G018090	0	-
HORVU0Hr1G018100	-0.286074	0.540624
HORVU0Hr1G018120	-0.434095	0.158143
HORVU0Hr1G018140	0.0378718	0.901283
HORVU0Hr1G018160	-0.658494	0.112036
HORVU0Hr1G018170	1.12877	0.0714326
HORVU0Hr1G018180	-1.00427	0.513302
HORVU0Hr1G018190	2.48225	0.100554
HORVU0Hr1G018200	-0.0280675	0.907811
HORVU0Hr1G018210	0.122718	0.751371
HORVU0Hr1G018240	-0.699718	0.517334
HORVU0Hr1G018250	0	-
HORVU0Hr1G018260	0	-
HORVU0Hr1G018270	8.61182	0.00084498
HORVU0Hr1G018280	0	-
HORVU0Hr1G018290	-0.149982	0.92338
HORVU0Hr1G018300	0.00826982	0.98052
HORVU0Hr1G018320	-1.64307	0.0384416
HORVU0Hr1G018350	0.278872	0.70975
HORVU0Hr1G018360	0.393109	0.502534
HORVU0Hr1G018370	-2.22884	0.000456069
HORVU0Hr1G018380	-2.22884	0.000456069
HORVU0Hr1G018390	-0.774414	0.1838
HORVU0Hr1G018410	0	-
HORVU0Hr1G018430	0	-
HORVU0Hr1G018450	0	-
HORVU0Hr1G018470	-0.291703	0.461893
HORVU0Hr1G018480	-0.486218	0.357134
HORVU0Hr1G018510	-0.102539	0.664001
HORVU0Hr1G018520	0	-
HORVU0Hr1G018530	0	-
HORVU0Hr1G018560	0	-
HORVU0Hr1G018570	0	-
HORVU0Hr1G018590	-7.35502	0.000464809
HORVU0Hr1G018670	0	-
HORVU0Hr1G018690	-0.922205	0.0130751
HORVU0Hr1G018710	-1.12934	0.116335
HORVU0Hr1G018730	0	-
HORVU0Hr1G018770	-0.193794	0.798193
HORVU0Hr1G018780	0	-
HORVU0Hr1G018800	0	-
HORVU0Hr1G018810	0	-
HORVU0Hr1G018820	0	-
HORVU0Hr1G018830	-0.568325	0.0972736
HORVU0Hr1G018840	-1.6046	0.234111
HORVU0Hr1G018850	-1.55716	0.263171
HORVU0Hr1G018890	-1.34944	0.0546425
HORVU0Hr1G018910	0	-
HORVU0Hr1G018940	0	-
HORVU0Hr1G018970	1.14971	0.00427258
HORVU0Hr1G018980	0.550794	0.0394386
HORVU0Hr1G019020	-5.30707	0.00286986
HORVU0Hr1G019050	-4.14442	0.00112897
HORVU0Hr1G019110	0	-
HORVU0Hr1G019120	0	-
HORVU0Hr1G019280	0	-
HORVU0Hr1G019300	-3.33049	0.0188504
HORVU0Hr1G019330	0	-
HORVU0Hr1G019350	-1.34075	0.0124991
HORVU0Hr1G019360	0	-
HORVU0Hr1G019370	0.164705	0.587059
HORVU0Hr1G019390	0.281993	0.366222
HORVU0Hr1G019400	0	-
HORVU0Hr1G019410	0	-
HORVU0Hr1G019420	-0.661685	0.454424
HORVU0Hr1G019430	0	-
HORVU0Hr1G019450	0.643409	0.278448
HORVU0Hr1G019500	1.48655	0.020101
HORVU0Hr1G019530	0	-
HORVU0Hr1G019560	0	-
HORVU0Hr1G019570	0	-
HORVU0Hr1G019590	6.99468	0.0613161
HORVU0Hr1G019600	-0.459539	0.172243
HORVU0Hr1G019610	0.321511	0.206187
HORVU0Hr1G019620	-0.059178	0.882582
HORVU0Hr1G019630	0	-
HORVU0Hr1G019640	0	-
HORVU0Hr1G019650	0	-
HORVU0Hr1G019660	0	-
HORVU0Hr1G019670	0	-
HORVU0Hr1G019680	-0.751328	0.346546
HORVU0Hr1G019690	-0.824988	0.430949
HORVU0Hr1G019700	-1.85561	0.00789066
HORVU0Hr1G019710	0.194833	0.351416
HORVU0Hr1G019750	0.178397	0.77481
HORVU0Hr1G019760	0.0225286	0.97826
HORVU0Hr1G019770	0.6324	0.118273
HORVU0Hr1G019780	0.0009395	0.99882
HORVU0Hr1G019800	0.180556	0.617773
HORVU0Hr1G019830	0	-
HORVU0Hr1G019840	-2.89379	0.0169115
HORVU0Hr1G019850	0.505754	0.305173
HORVU0Hr1G019870	-0.610908	0.386272
HORVU0Hr1G019920	-2.11917	0.0895928
HORVU0Hr1G019930	-0.636084	0.314921
HORVU0Hr1G019940	0	-
HORVU0Hr1G019950	-0.883277	0.123541
HORVU0Hr1G020040	0	-
HORVU0Hr1G020070	0.497859	0.117954
HORVU0Hr1G020090	0	-
HORVU0Hr1G020110	0.483003	0.0710195
HORVU0Hr1G020130	-0.146251	0.880375
HORVU0Hr1G020140	0.712135	0.0115975
HORVU0Hr1G020160	0.391202	0.273266
HORVU0Hr1G020180	0.238249	0.39497
HORVU0Hr1G020200	-0.378535	0.330455
HORVU0Hr1G020210	0.34866	0.421089
HORVU0Hr1G020220	0.0750542	0.869647
HORVU0Hr1G020230	-1.68496	0.0824231
HORVU0Hr1G020240	-0.35225	0.464738
HORVU0Hr1G020250	0	-
HORVU0Hr1G020260	-0.0433594	0.873861
HORVU0Hr1G020270	-3.31607	0.00487937
HORVU0Hr1G020280	0	-
HORVU0Hr1G020290	0	-
HORVU0Hr1G020300	-0.475544	0.523203
HORVU0Hr1G020310	0	-
HORVU0Hr1G020320	1.71607	0.0600425
HORVU0Hr1G020330	-6.90033	0.00371931
HORVU0Hr1G020340	0	-
HORVU0Hr1G020350	-2.11672	0.0531681
HORVU0Hr1G020360	-1.70131	0.0208853
HORVU0Hr1G020370	0	-
HORVU0Hr1G020380	0	-
HORVU0Hr1G020400	0	-
HORVU0Hr1G020420	0.0243451	0.975252
HORVU0Hr1G020450	0.201129	0.595456
HORVU0Hr1G020460	0	-
HORVU0Hr1G020490	0.131325	0.737616
HORVU0Hr1G020500	0.336967	0.39257
HORVU0Hr1G020520	0	-
HORVU0Hr1G020540	0	-
HORVU0Hr1G020550	0	-
HORVU0Hr1G020560	0	-
HORVU0Hr1G020590	1.59481	0.0324677
HORVU0Hr1G020630	0.738355	0.356521
HORVU0Hr1G020690	0	-
HORVU0Hr1G020700	0	-
HORVU0Hr1G020710	0	-
HORVU0Hr1G020720	0	-
HORVU0Hr1G020730	-0.999849	0.0155525
HORVU0Hr1G020740	0	-
HORVU0Hr1G020750	2.15691	0.0348193
HORVU0Hr1G020770	-2.04183	0.013302
HORVU0Hr1G020780	-2.03902	0.0279061
HORVU0Hr1G020790	0.0908793	0.686739
HORVU0Hr1G020800	0.389875	0.234421
HORVU0Hr1G020810	-0.12042	0.898767
HORVU0Hr1G020840	0.231806	0.575616
HORVU0Hr1G020850	0.219459	0.649822
HORVU0Hr1G020860	-0.0497117	0.930513
HORVU0Hr1G020900	0	-
HORVU0Hr1G020910	0	-
HORVU0Hr1G020930	0	-
HORVU0Hr1G020940	0.106824	0.923412
HORVU0Hr1G020950	0	-
HORVU0Hr1G020960	0.913798	0.162251
HORVU0Hr1G020980	-0.617673	0.0499737
HORVU0Hr1G021000	0.333578	0.331133
HORVU0Hr1G021040	0	-
HORVU0Hr1G021050	-0.204808	0.781916
HORVU0Hr1G021060	-0.257473	0.251733
HORVU0Hr1G021100	0.389046	0.170994
HORVU0Hr1G021120	0	-
HORVU0Hr1G021140	0.902381	0.0207414
HORVU0Hr1G021200	0.235967	0.533882
HORVU0Hr1G021220	0	-
HORVU0Hr1G021230	0.092611	0.644775
HORVU0Hr1G021240	0	-
HORVU0Hr1G021280	2.20433	0.0714764
HORVU0Hr1G021290	0	-
HORVU0Hr1G021390	0.134556	0.782519
HORVU0Hr1G021400	0.122607	0.806481
HORVU0Hr1G021410	0	-
HORVU0Hr1G021440	0	-
HORVU0Hr1G021450	-0.825289	0.174857
HORVU0Hr1G021460	-0.742032	0.296593
HORVU0Hr1G021480	-0.455709	0.694807
HORVU0Hr1G021500	-0.698499	0.572808
HORVU0Hr1G021520	0	-
HORVU0Hr1G021540	-3.27643	0.0591238
HORVU0Hr1G021590	-0.279718	0.770423
HORVU0Hr1G021610	-0.786897	0.425951
HORVU0Hr1G021630	-2.10903	0.00133199
HORVU0Hr1G021640	1.23959	0.0117317
HORVU0Hr1G021670	-3.39136	0.0049534
HORVU0Hr1G021680	0	-
HORVU0Hr1G021690	0.722989	0.421545
HORVU0Hr1G021720	-1.116	0.0758047
HORVU0Hr1G021730	0.359371	0.282659
HORVU0Hr1G021740	0.52341	0.050527
HORVU0Hr1G021760	-1.12121	0.0141145
HORVU0Hr1G021780	0.238265	0.680309
HORVU0Hr1G021800	-1.29237	0.0547554
HORVU0Hr1G021810	-1.55508	0.00204195
HORVU0Hr1G021820	0	-
HORVU0Hr1G021830	0	-
HORVU0Hr1G021850	2.10071	0.000200394
HORVU0Hr1G021860	-0.10209	0.774968
HORVU0Hr1G021880	0.306367	0.121411
HORVU0Hr1G021890	0	-
HORVU0Hr1G021920	0	-
HORVU0Hr1G021930	0.607044	0.169848
HORVU0Hr1G021940	0.5486	0.0265977
HORVU0Hr1G021950	0.345495	0.316054
HORVU0Hr1G021960	0.309965	0.333142
HORVU0Hr1G021970	0.330262	0.289634
HORVU0Hr1G021980	0.359719	0.177468
HORVU0Hr1G022000	0.728944	0.102543
HORVU0Hr1G022020	-0.500287	0.659931
HORVU0Hr1G022030	0.681058	0.374665
HORVU0Hr1G022050	-0.44968	0.0363667
HORVU0Hr1G022060	-0.42903	0.499548
HORVU0Hr1G022070	-1.95359	0.109926
HORVU0Hr1G022090	-1.11321	0.321016
HORVU0Hr1G022100	-4.73177	0.000725593
HORVU0Hr1G022110	-0.5335	0.657766
HORVU0Hr1G022130	0	-
HORVU0Hr1G022140	0	-
HORVU0Hr1G022150	0	-
HORVU0Hr1G022160	-0.0685998	0.830523
HORVU0Hr1G022170	0	-
HORVU0Hr1G022190	0	-
HORVU0Hr1G022200	0	-
HORVU0Hr1G022220	0	-
HORVU0Hr1G022230	0	-
HORVU0Hr1G022240	0.470616	0.0332901
HORVU0Hr1G022260	-0.559379	0.562909
HORVU0Hr1G022270	-0.274312	0.279051
HORVU0Hr1G022280	-0.227277	0.559658
HORVU0Hr1G022290	-0.779206	0.160091
HORVU0Hr1G022300	-0.617039	0.00160917
HORVU0Hr1G022310	0.0402538	0.892984
HORVU0Hr1G022320	0	-
HORVU0Hr1G022330	-2.70818	0.0178325
HORVU0Hr1G022340	0.49332	0.364542
HORVU0Hr1G022350	-3.93101	0.127608
HORVU0Hr1G022360	-0.530822	0.676672
HORVU0Hr1G022370	-0.395615	0.573479
HORVU0Hr1G022380	2.04674	0.00196901
HORVU0Hr1G022390	0	-
HORVU0Hr1G022440	1.51266	0.00410262
HORVU0Hr1G022450	3.73495	0.000674582
HORVU0Hr1G022460	0.035663	0.907512
HORVU0Hr1G022470	-0.804686	0.0202631
HORVU0Hr1G022480	0.865635	0.0300379
HORVU0Hr1G022500	0.310234	0.27273
HORVU0Hr1G022510	0.157654	0.444907
HORVU0Hr1G022520	0	-
HORVU0Hr1G022540	0	-
HORVU0Hr1G022550	0.0153955	0.984765
HORVU0Hr1G022570	0	-
HORVU0Hr1G022580	-0.233632	0.346768
HORVU0Hr1G022590	0.720685	0.0421712
HORVU0Hr1G022610	3.08679	0.0848745
HORVU0Hr1G022650	-5.87604	0.000428737
HORVU0Hr1G022670	1.41291	0.000778238
HORVU0Hr1G022680	0	-
HORVU0Hr1G022690	-1.10775	0.385601
HORVU0Hr1G022730	0	-
HORVU0Hr1G022740	0	-
HORVU0Hr1G022750	0	-
HORVU0Hr1G022770	0	-
HORVU0Hr1G022780	-2.07447	0.132922
HORVU0Hr1G022790	0	-
HORVU0Hr1G022810	-0.285069	0.334685
HORVU0Hr1G022820	-1.99036	0.0317234
HORVU0Hr1G022830	-0.170188	0.469766
HORVU0Hr1G022870	0	-
HORVU0Hr1G023050	0	-
HORVU0Hr1G023060	0	-
HORVU0Hr1G023080	0	-
HORVU0Hr1G023090	0	-
HORVU0Hr1G023120	0	-
HORVU0Hr1G023140	-0.306061	0.402679
HORVU0Hr1G023150	0.973257	0.0210148
HORVU0Hr1G023160	0	-
HORVU0Hr1G023170	0	-
HORVU0Hr1G023180	-0.12751	0.743202
HORVU0Hr1G023190	0	-
HORVU0Hr1G023200	0.225086	0.558863
HORVU0Hr1G023240	0	-
HORVU0Hr1G023250	0.0109893	0.982166
HORVU0Hr1G023260	0	-
HORVU0Hr1G023280	-0.16353	0.532978
HORVU0Hr1G023290	-0.322305	0.289166
HORVU0Hr1G023300	0.507736	0.0175691
HORVU0Hr1G023320	0	-
HORVU0Hr1G023330	0.758064	0.109891
HORVU0Hr1G023360	1.97584	0.219336
HORVU0Hr1G023420	0	-
HORVU0Hr1G023460	1.13848	0.000596692
HORVU0Hr1G023470	0.223804	0.37826
HORVU0Hr1G023480	0.401174	0.626202
HORVU0Hr1G023490	0	-
HORVU0Hr1G023510	0.227096	0.264636
HORVU0Hr1G023540	1.44342	0.00901157
HORVU0Hr1G023570	2.60903	0.686367
HORVU0Hr1G023590	1.50727	0.443847
HORVU0Hr1G023600	0	-
HORVU0Hr1G023610	0	-
HORVU0Hr1G023640	0.49223	0.0741225
HORVU0Hr1G023660	0.494975	0.214553
HORVU0Hr1G023690	0	-
HORVU0Hr1G023700	0	-
HORVU0Hr1G023710	0	-
HORVU0Hr1G023720	0	-
HORVU0Hr1G023740	2.90849	0.00193037
HORVU0Hr1G023750	0.706105	0.0516008
HORVU0Hr1G023760	0.729598	0.0457897
HORVU0Hr1G023810	0	-
HORVU0Hr1G023830	0	-
HORVU0Hr1G023840	0	-
HORVU0Hr1G023870	-0.157458	0.863819
HORVU0Hr1G023890	-0.255985	0.767177
HORVU0Hr1G023910	-0.237744	0.785982
HORVU0Hr1G023920	-0.14706	0.872643
HORVU0Hr1G023930	-0.374192	0.597748
HORVU0Hr1G023940	-0.833967	0.188074
HORVU0Hr1G023950	0	-
HORVU0Hr1G023970	-0.629348	0.314267
HORVU0Hr1G023980	-0.539745	0.365867
HORVU0Hr1G023990	0.111631	0.870149
HORVU0Hr1G024020	0.0613154	0.951765
HORVU0Hr1G024030	-0.197597	0.823335
HORVU0Hr1G024050	-1.10198	0.135299
HORVU0Hr1G024060	1.09432	0.343148
HORVU0Hr1G024070	-1.10199	0.147654
HORVU0Hr1G024100	0	-
HORVU0Hr1G024120	-0.301135	0.719198
HORVU0Hr1G024130	-0.397701	0.531728
HORVU0Hr1G024140	0.242648	0.85557
HORVU0Hr1G024160	-0.421629	0.526049
HORVU0Hr1G024170	-0.102939	0.913895
HORVU0Hr1G024180	-0.184928	0.832696
HORVU0Hr1G024190	0	-
HORVU0Hr1G024200	1.27409	0.0451268
HORVU0Hr1G024220	-0.769161	0.159665
HORVU0Hr1G024230	-0.115685	0.911143
HORVU0Hr1G024270	-0.768856	0.15969
HORVU0Hr1G024280	-0.977438	0.0746233
HORVU0Hr1G024300	-9.33531e-05	0.999963
HORVU0Hr1G024310	0	-
HORVU0Hr1G024320	-0.222546	0.635681
HORVU0Hr1G024390	0	-
HORVU0Hr1G024400	0	-
HORVU0Hr1G024440	-1.55569	0.154685
HORVU0Hr1G024450	0.84011	0.243757
HORVU0Hr1G024460	0	-
HORVU0Hr1G024470	-1.27387	0.304476
HORVU0Hr1G024480	-0.146292	0.819095
HORVU0Hr1G024490	0.721627	0.076472
HORVU0Hr1G024520	-0.776543	0.40553
HORVU0Hr1G024530	0.302033	0.597323
HORVU0Hr1G024540	0.272724	0.552128
HORVU0Hr1G024550	0.150417	0.813454
HORVU0Hr1G024560	0.538455	0.470522
HORVU0Hr1G024580	-0.157376	0.814713
HORVU0Hr1G024610	-0.434178	0.556244
HORVU0Hr1G024620	0.361117	0.391773
HORVU0Hr1G024630	-0.405151	0.580828
HORVU0Hr1G024650	-0.3606	0.707561
HORVU0Hr1G024670	-0.387647	0.580002
HORVU0Hr1G024680	0.361117	0.391773
HORVU0Hr1G024690	0	-
HORVU0Hr1G024700	-0.915759	0.0920706
HORVU0Hr1G024720	0.531263	0.254204
HORVU0Hr1G024740	0.311527	0.150323
HORVU0Hr1G024750	-1.55569	0.154685
HORVU0Hr1G024760	-0.300824	0.695029
HORVU0Hr1G024790	0.555917	0.43225
HORVU0Hr1G024810	-0.338337	0.559308
HORVU0Hr1G024830	-0.240683	0.706248
HORVU0Hr1G024840	0	-
HORVU0Hr1G024880	0.501624	0.496359
HORVU0Hr1G024890	0.532086	0.470132
HORVU0Hr1G024900	0.10981	0.854656
HORVU0Hr1G024920	0.492813	0.256901
HORVU0Hr1G024930	-0.515956	0.439291
HORVU0Hr1G024950	-0.255312	0.775124
HORVU0Hr1G024960	0.540877	0.117762
HORVU0Hr1G024970	-1.2785	0.176284
HORVU0Hr1G024980	0.302033	0.597323
HORVU0Hr1G024990	-0.745541	0.600854
HORVU0Hr1G025010	-0.723721	0.16563
HORVU0Hr1G025040	-0.546767	0.417022
HORVU0Hr1G025100	-0.699607	0.624714
HORVU0Hr1G025110	-0.606906	0.674911
HORVU0Hr1G025120	0.579577	0.452595
HORVU0Hr1G025160	0.546298	0.4188
HORVU0Hr1G025180	-0.688236	0.605353
HORVU0Hr1G025190	-0.399174	0.586446
HORVU0Hr1G025220	-1.01424	0.0906299
HORVU0Hr1G025240	-0.296681	0.736748
HORVU0Hr1G025250	0	-
HORVU0Hr1G025290	0	-
HORVU0Hr1G025310	0	-
HORVU0Hr1G025330	0	-
HORVU0Hr1G025370	0	-
HORVU0Hr1G025390	0	-
HORVU0Hr1G025410	0.146096	0.761775
HORVU0Hr1G025420	0	-
HORVU0Hr1G025430	0	-
HORVU0Hr1G025440	0.385471	0.627041
HORVU0Hr1G025460	-0.277861	0.791575
HORVU0Hr1G025520	0	-
HORVU0Hr1G025530	0	-
HORVU0Hr1G025540	0.257466	0.303521
HORVU0Hr1G025620	0	-
HORVU0Hr1G025630	0.0798473	0.933677
HORVU0Hr1G025650	0.606521	0.568459
HORVU0Hr1G025660	0	-
HORVU0Hr1G025670	0	-
HORVU0Hr1G025690	0	-
HORVU0Hr1G025700	-2.20441	0.109673
HORVU0Hr1G025750	0	-
HORVU0Hr1G025760	0	-
HORVU0Hr1G025770	0	-
HORVU0Hr1G025790	0.0510849	0.943618
HORVU0Hr1G025800	-3.61966	0.0154223
HORVU0Hr1G025810	-3.60396	0.0155409
HORVU0Hr1G025820	-0.313495	0.439732
HORVU0Hr1G025850	0.593659	0.349854
HORVU0Hr1G025860	0.343315	0.366668
HORVU0Hr1G025870	-0.162077	0.595036
HORVU0Hr1G025890	0.0345123	0.943489
HORVU0Hr1G025900	0.824041	0.00867204
HORVU0Hr1G025910	0.420312	0.364523
HORVU0Hr1G025920	-0.293049	0.48229
HORVU0Hr1G025970	0	-
HORVU0Hr1G026010	0.112086	0.795722
HORVU0Hr1G026030	-1.00969	0.0165201
HORVU0Hr1G026070	0.146398	0.818518
HORVU0Hr1G026090	0.591084	0.41633
HORVU0Hr1G026120	0.0445265	0.967886
HORVU0Hr1G026130	0.241396	0.853254
HORVU0Hr1G026140	-0.364011	0.584829
HORVU0Hr1G026150	0.525405	0.23168
HORVU0Hr1G026160	0.382711	0.66235
HORVU0Hr1G026170	0.361117	0.391773
HORVU0Hr1G026190	-0.579013	0.303715
HORVU0Hr1G026200	-0.539996	0.3778
HORVU0Hr1G026230	-0.765919	0.0951607
HORVU0Hr1G026250	-0.947872	0.170272
HORVU0Hr1G026260	-0.52729	0.47274
HORVU0Hr1G026270	-0.529737	0.411338
HORVU0Hr1G026280	-0.60281	0.26997
HORVU0Hr1G026290	0.361117	0.391773
HORVU0Hr1G026330	1.15589	0.0873562
HORVU0Hr1G026340	0	-
HORVU0Hr1G026370	0	-
HORVU0Hr1G026390	0	-
HORVU0Hr1G026410	0	-
HORVU0Hr1G026430	0.19626	0.779212
HORVU0Hr1G026480	-0.0315561	0.969816
HORVU0Hr1G026500	0.116387	0.806335
HORVU0Hr1G026520	0	-
HORVU0Hr1G026530	0	-
HORVU0Hr1G026540	0	-
HORVU0Hr1G026550	0	-
HORVU0Hr1G026560	0	-
HORVU0Hr1G026590	0.490581	0.718118
HORVU0Hr1G026620	0	-
HORVU0Hr1G026630	0	-
HORVU0Hr1G026640	-0.0673767	0.924772
HORVU0Hr1G026650	0.645365	0.267512
HORVU0Hr1G026660	0	-
HORVU0Hr1G026690	0	-
HORVU0Hr1G026700	1.07742	0.00667468
HORVU0Hr1G026710	0.0142259	0.988797
HORVU0Hr1G026730	0	-
HORVU0Hr1G026770	-0.765919	0.0951607
HORVU0Hr1G026780	-0.94594	0.283475
HORVU0Hr1G026790	-0.594891	0.445965
HORVU0Hr1G026800	-0.553439	0.4526
HORVU0Hr1G026810	-0.493433	0.442476
HORVU0Hr1G026820	-0.856499	0.0966447
HORVU0Hr1G026830	0.361117	0.391773
HORVU0Hr1G026860	-1.44126	0.0892566
HORVU0Hr1G026870	-0.576097	0.455945
HORVU0Hr1G026890	-0.545026	0.332036
HORVU0Hr1G026900	-0.770591	0.0941146
HORVU0Hr1G026910	-0.218624	0.806457
HORVU0Hr1G026930	0	-
HORVU0Hr1G026940	-1.05568	0.147974
HORVU0Hr1G026950	-0.770591	0.0941146
HORVU0Hr1G026990	-0.637476	0.646745
HORVU0Hr1G027000	0.940222	0.567844
HORVU0Hr1G027010	0.049403	0.826102
HORVU0Hr1G027030	0	-
HORVU0Hr1G027050	0.656409	0.182498
HORVU0Hr1G027060	0.147571	0.439999
HORVU0Hr1G027070	-1.6698	0.000858144
HORVU0Hr1G027080	-0.899047	0.0126549
HORVU0Hr1G027100	0	-
HORVU0Hr1G027130	-0.0841946	0.817041
HORVU0Hr1G027160	0.706518	0.0283576
HORVU0Hr1G027170	0.418445	0.09291
HORVU0Hr1G027200	-0.242007	0.862899
HORVU0Hr1G027230	0.706518	0.0283576
HORVU0Hr1G027280	0	-
HORVU0Hr1G027290	-0.139769	0.643444
HORVU0Hr1G027310	2.06869	0.00117168
HORVU0Hr1G027380	0	-
HORVU0Hr1G027400	0	-
HORVU0Hr1G027410	-2.64015	0.0111169
HORVU0Hr1G027430	0.591507	0.312189
HORVU0Hr1G027440	0.02419	0.974028
HORVU0Hr1G027450	0	-
HORVU0Hr1G027460	0.00802697	0.993806
HORVU0Hr1G027480	0	-
HORVU0Hr1G027490	0.420312	0.364523
HORVU0Hr1G027510	0.421775	0.520392
HORVU0Hr1G027520	-0.571149	0.306274
HORVU0Hr1G027540	0.466622	0.310606
HORVU0Hr1G027550	0.268597	0.588231
HORVU0Hr1G027560	0.187421	0.871784
HORVU0Hr1G027570	0	-
HORVU0Hr1G027600	0.0451327	0.952108
HORVU0Hr1G027620	0.511964	0.470166
HORVU0Hr1G027640	-0.297385	0.684545
HORVU0Hr1G027660	0.405941	0.229624
HORVU0Hr1G027670	0.0558708	0.884898
HORVU0Hr1G027680	0.228234	0.206706
HORVU0Hr1G027900	0.751908	0.0881786
HORVU0Hr1G027910	0.248481	0.667635
HORVU0Hr1G027920	0	-
HORVU0Hr1G027940	0	-
HORVU0Hr1G027960	-0.159646	0.736748
HORVU0Hr1G027970	0.814082	0.00237987
HORVU0Hr1G027980	-1.33077	0.159184
HORVU0Hr1G027990	0	-
HORVU0Hr1G028010	0.0609678	0.835887
HORVU0Hr1G028040	0	-
HORVU0Hr1G028080	0.295516	0.247504
HORVU0Hr1G028130	-1.4659	0.00334175
HORVU0Hr1G028140	-1.85678	0.00394873
HORVU0Hr1G028170	0.0384136	0.906785
HORVU0Hr1G028210	0	-
HORVU0Hr1G028230	0.47767	0.465368
HORVU0Hr1G028270	0.702442	0.0619021
HORVU0Hr1G028300	0	-
HORVU0Hr1G028320	0.420312	0.364523
HORVU0Hr1G028350	0.558962	0.190418
HORVU0Hr1G028360	-0.537215	0.47378
HORVU0Hr1G028370	-0.441902	0.5262
HORVU0Hr1G028380	-0.535843	0.344545
HORVU0Hr1G028390	0.361117	0.391773
HORVU0Hr1G028400	-0.438778	0.544668
HORVU0Hr1G028410	-0.198691	0.776468
HORVU0Hr1G028420	0.0445265	0.967886
HORVU0Hr1G028450	-0.157376	0.814713
HORVU0Hr1G028470	0.300236	0.638728
HORVU0Hr1G028480	0.57476	0.236066
HORVU0Hr1G028530	-0.143358	0.815977
HORVU0Hr1G028540	-1.35296	0.0555806
HORVU0Hr1G028550	0	-
HORVU0Hr1G028560	0.1424	0.933677
HORVU0Hr1G028570	-1.27387	0.304476
HORVU0Hr1G028580	0.84011	0.243757
HORVU0Hr1G028590	-1.55569	0.154685
HORVU0Hr1G028600	-1.07843	0.264749
HORVU0Hr1G028640	-0.637476	0.646745
HORVU0Hr1G028650	-0.765919	0.0951607
HORVU0Hr1G028660	0.295541	0.785354
HORVU0Hr1G028670	0.539582	0.145457
HORVU0Hr1G028680	2.16598	0.0044167
HORVU0Hr1G028710	0.398518	0.385032
HORVU0Hr1G028890	0	-
HORVU0Hr1G028900	-0.313978	0.818832
HORVU0Hr1G028920	-0.587571	0.580464
HORVU0Hr1G028930	0.125115	0.696903
HORVU0Hr1G028950	-1.1547	0.0831231
HORVU0Hr1G028970	0.889869	0.132791
HORVU0Hr1G028990	-0.190199	0.412163
HORVU0Hr1G029050	0.194108	0.802587
HORVU0Hr1G029090	-0.291862	0.591238
HORVU0Hr1G029100	0	-
HORVU0Hr1G029110	0	-
HORVU0Hr1G029140	0.421425	0.297742
HORVU0Hr1G029180	-0.760485	0.131785
HORVU0Hr1G029190	-0.563861	0.400317
HORVU0Hr1G029200	-0.806227	0.100504
HORVU0Hr1G029210	0	-
HORVU0Hr1G029220	0	-
HORVU0Hr1G029230	0	-
HORVU0Hr1G029310	-0.603438	0.305173
HORVU0Hr1G029320	-0.523569	0.381458
HORVU0Hr1G029340	-0.61601	0.277809
HORVU0Hr1G029350	-0.2659	0.702918
HORVU0Hr1G029370	0.287333	0.531991
HORVU0Hr1G029460	0.258251	0.741822
HORVU0Hr1G029480	-0.712326	0.301984
HORVU0Hr1G029490	0	-
HORVU0Hr1G029500	0.693009	0.262367
HORVU0Hr1G029520	-0.0653668	0.9027
HORVU0Hr1G029570	0	-
HORVU0Hr1G029590	0.0797567	0.891364
HORVU0Hr1G029600	0.102561	0.837832
HORVU0Hr1G029660	0.295541	0.785354
HORVU0Hr1G029670	0.301886	0.19572
HORVU0Hr1G029680	-1.55569	0.154685
HORVU0Hr1G029690	0.84011	0.243757
HORVU0Hr1G029720	0.203703	0.518426
HORVU0Hr1G029730	0.161201	0.722776
HORVU0Hr1G029750	-0.4761	0.411925
HORVU0Hr1G029760	0.366552	0.512038
HORVU0Hr1G029770	0.176342	0.780537
HORVU0Hr1G029780	0.449301	0.532842
HORVU0Hr1G029790	0.304908	0.66594
HORVU0Hr1G029810	-0.0924685	0.893815
HORVU0Hr1G029850	0.927167	0.469728
HORVU0Hr1G029860	-0.736337	0.291477
HORVU0Hr1G029870	0.0445265	0.967886
HORVU0Hr1G029880	0.241396	0.853254
HORVU0Hr1G029890	-0.364011	0.584829
HORVU0Hr1G029900	0.525405	0.23168
HORVU0Hr1G029910	0.242056	0.509563
HORVU0Hr1G029920	-0.387647	0.580002
HORVU0Hr1G029930	0.361117	0.391773
HORVU0Hr1G029960	-0.779322	0.0895481
HORVU0Hr1G029980	0	-
HORVU0Hr1G030000	0	-
HORVU0Hr1G030010	0.31492	0.291769
HORVU0Hr1G030030	0	-
HORVU0Hr1G030060	0	-
HORVU0Hr1G030080	-0.580547	0.427449
HORVU0Hr1G030090	-0.598908	0.532443
HORVU0Hr1G030100	0	-
HORVU0Hr1G030120	-0.0455965	0.901452
HORVU0Hr1G030130	0	-
HORVU0Hr1G030140	0	-
HORVU0Hr1G030160	-0.847391	0.31819
HORVU0Hr1G030170	0	-
HORVU0Hr1G030190	0.825388	0.0664671
HORVU0Hr1G030200	-0.340207	0.282439
HORVU0Hr1G030280	-0.206407	0.553897
HORVU0Hr1G030300	-0.25761	0.293907
HORVU0Hr1G030310	0	-
HORVU0Hr1G030360	0	-
HORVU0Hr1G030370	0	-
HORVU0Hr1G030380	0	-
HORVU0Hr1G030390	0	-
HORVU0Hr1G030440	-0.0863042	0.705669
HORVU0Hr1G030450	-0.145579	0.678208
HORVU0Hr1G030460	0.88615	0.00320262
HORVU0Hr1G030500	-0.715106	0.532639
HORVU0Hr1G030510	0	-
HORVU0Hr1G030520	-1.32011	0.374257
HORVU0Hr1G030570	0	-
HORVU0Hr1G030600	-0.668826	0.507292
HORVU0Hr1G030630	-1.02125	0.0556291
HORVU0Hr1G030640	-1.32856	0.0191553
HORVU0Hr1G030650	0	-
HORVU0Hr1G030660	0	-
HORVU0Hr1G030670	0	-
HORVU0Hr1G030680	0	-
HORVU0Hr1G030690	-0.60281	0.26997
HORVU0Hr1G030700	0.466622	0.310606
HORVU0Hr1G030710	0.187421	0.871784
HORVU0Hr1G030740	0.177156	0.786492
HORVU0Hr1G030760	-0.186107	0.781566
HORVU0Hr1G030770	0.629799	0.185089
HORVU0Hr1G030780	0.243715	0.700173
HORVU0Hr1G030810	0.393046	0.251896
HORVU0Hr1G030820	-0.370043	0.263644
HORVU0Hr1G030830	-1.32059	0.167754
HORVU0Hr1G030860	0	-
HORVU0Hr1G030870	0	-
HORVU0Hr1G030920	0.0509498	0.861348
HORVU0Hr1G030950	0	-
HORVU0Hr1G030970	0	-
HORVU0Hr1G030980	0.132843	0.668837
HORVU0Hr1G031050	-0.877792	0.348117
HORVU0Hr1G031060	-0.620608	0.503348
HORVU0Hr1G031070	-0.302717	0.594168
HORVU0Hr1G031080	0	-
HORVU0Hr1G031100	0	-
HORVU0Hr1G031130	0	-
HORVU0Hr1G031140	0.411933	0.724993
HORVU0Hr1G031170	0.776299	0.0085159
HORVU0Hr1G031210	0	-
HORVU0Hr1G031250	-0.637476	0.646745
HORVU0Hr1G031270	0.305005	0.665893
HORVU0Hr1G031290	0.0552859	0.95838
HORVU0Hr1G031300	0.400074	0.376292
HORVU0Hr1G031330	0.527134	0.474315
HORVU0Hr1G031350	-0.335036	0.738595
HORVU0Hr1G031360	0.203191	0.769666
HORVU0Hr1G031380	0.658899	0.597683
HORVU0Hr1G031420	-0.105038	0.767594
HORVU0Hr1G031430	0.302033	0.597323
HORVU0Hr1G031440	-0.364011	0.584829
HORVU0Hr1G031450	0.310419	0.516649
HORVU0Hr1G031470	0.272437	0.66594
HORVU0Hr1G031480	-0.124567	0.83431
HORVU0Hr1G031500	-0.454862	0.134256
HORVU0Hr1G031520	0.0763493	0.82243
HORVU0Hr1G031580	-8.87246	8.10247e-05
HORVU0Hr1G031620	0	-
HORVU0Hr1G031630	0	-
HORVU0Hr1G031640	0	-
HORVU0Hr1G031650	0	-
HORVU0Hr1G031660	0	-
HORVU0Hr1G031690	-0.369396	0.165201
HORVU0Hr1G031700	2.12722	0.00399149
HORVU0Hr1G031710	-2.26697	0.00772658
HORVU0Hr1G031720	0.299062	0.55882
HORVU0Hr1G031730	0.397144	0.385706
HORVU0Hr1G031750	0	-
HORVU0Hr1G031760	-0.158562	0.446788
HORVU0Hr1G031790	0	-
HORVU0Hr1G031810	-0.174338	0.636191
HORVU0Hr1G031830	0	-
HORVU0Hr1G031850	0.504297	0.0860049
HORVU0Hr1G031890	-0.279476	0.540967
HORVU0Hr1G031910	0	-
HORVU0Hr1G031920	-0.0323562	0.96625
HORVU0Hr1G031930	1.28456	0.527841
HORVU0Hr1G031950	1.09432	0.343148
HORVU0Hr1G031960	0.335264	0.125965
HORVU0Hr1G031970	1.73447	0.00517865
HORVU0Hr1G031980	0.448561	0.0233099
HORVU0Hr1G031990	0	-
HORVU0Hr1G032000	-0.286905	0.835428
HORVU0Hr1G032020	-0.53151	0.625929
HORVU0Hr1G032040	0	-
HORVU0Hr1G032060	0	-
HORVU0Hr1G032070	-1.04055	0.117364
HORVU0Hr1G032100	-5.58784	0.00128983
HORVU0Hr1G032110	0.103125	0.85963
HORVU0Hr1G032120	0.290519	0.411005
HORVU0Hr1G032130	0	-
HORVU0Hr1G032140	0.940222	0.567844
HORVU0Hr1G032200	0	-
HORVU0Hr1G032220	0	-
HORVU0Hr1G032230	0.799401	0.364569
HORVU0Hr1G032250	-0.407149	0.412809
HORVU0Hr1G032260	-1.55909	0.00661584
HORVU0Hr1G032280	-0.106755	0.883937
HORVU0Hr1G032300	0	-
HORVU0Hr1G032310	0	-
HORVU0Hr1G032320	0.346537	0.371264
HORVU0Hr1G032330	0.346537	0.371264
HORVU0Hr1G032340	0	-
HORVU0Hr1G032350	-2.1743	0.0155201
HORVU0Hr1G032360	0.0908523	0.799133
HORVU0Hr1G032370	0.399997	0.750571
HORVU0Hr1G032390	0.0323454	0.920527
HORVU0Hr1G032400	-0.213776	0.606893
HORVU0Hr1G032410	0	-
HORVU0Hr1G032440	0	-
HORVU0Hr1G032490	-0.347387	0.853611
HORVU0Hr1G032510	0	-
HORVU0Hr1G032540	-1.10073	0.0945366
HORVU0Hr1G032560	0	-
HORVU0Hr1G032570	0.400074	0.376292
HORVU0Hr1G032600	-0.324433	0.669027
HORVU0Hr1G032620	0.0552859	0.95838
HORVU0Hr1G032640	0.531922	0.469734
HORVU0Hr1G032670	0	-
HORVU0Hr1G032690	0	-
HORVU0Hr1G032700	0	-
HORVU0Hr1G032710	-0.692763	0.35878
HORVU0Hr1G032720	0	-
HORVU0Hr1G032730	-1.35296	0.0555806
HORVU0Hr1G032740	-0.146292	0.819095
HORVU0Hr1G032800	0.360689	0.551526
HORVU0Hr1G032810	0.267837	0.558235
HORVU0Hr1G032820	0.57476	0.236066
HORVU0Hr1G032830	-0.444693	0.406495
HORVU0Hr1G032840	0	-
HORVU0Hr1G032850	0	-
HORVU0Hr1G032860	0	-
HORVU0Hr1G032870	0	-
HORVU0Hr1G032890	0	-
HORVU0Hr1G032900	0	-
HORVU0Hr1G032910	-0.770591	0.0941146
HORVU0Hr1G032920	-0.527287	0.471762
HORVU0Hr1G032930	-0.54	0.37838
HORVU0Hr1G032940	-0.588381	0.298967
HORVU0Hr1G032950	0.361117	0.391773
HORVU0Hr1G032960	-0.198691	0.776468
HORVU0Hr1G032970	0.0492427	0.964695
HORVU0Hr1G032980	0.484629	0.786492
HORVU0Hr1G033000	0.264298	0.64918
HORVU0Hr1G033020	-0.302338	0.660784
HORVU0Hr1G033030	0.695332	0.372285
HORVU0Hr1G033050	0.0917638	0.903721
HORVU0Hr1G033060	0.272437	0.66594
HORVU0Hr1G033070	0.710517	0.170347
HORVU0Hr1G033090	-0.693306	0.605016
HORVU0Hr1G033120	0	-
HORVU0Hr1G033130	-0.637476	0.646745
HORVU0Hr1G033160	0	-
HORVU0Hr1G033170	0	-
HORVU0Hr1G033190	0	-
HORVU0Hr1G033200	-0.0501809	0.912074
HORVU0Hr1G033220	0	-
HORVU0Hr1G033250	0	-
HORVU0Hr1G033260	0.494975	0.432022
HORVU0Hr1G033280	-0.157376	0.814713
HORVU0Hr1G033290	-1.11457	0.229826
HORVU0Hr1G033300	-0.693306	0.605016
HORVU0Hr1G033320	0	-
HORVU0Hr1G033330	-1.91422	0.000550997
HORVU0Hr1G033360	-0.0136162	0.99006
HORVU0Hr1G033370	-0.115756	0.907811
HORVU0Hr1G033410	-0.765919	0.0951607
HORVU0Hr1G033420	-0.948284	0.156927
HORVU0Hr1G033440	-0.514775	0.424366
HORVU0Hr1G033450	-0.555585	0.322877
HORVU0Hr1G033460	0.361117	0.391773
HORVU0Hr1G033470	-0.198691	0.776468
HORVU0Hr1G033480	0.241396	0.853254
HORVU0Hr1G033490	0.0445265	0.967886
HORVU0Hr1G033520	-0.157376	0.814713
HORVU0Hr1G033540	-0.422708	0.65343
HORVU0Hr1G033550	-1.84279	0.0260094
HORVU0Hr1G033560	-1.38344	0.154685
HORVU0Hr1G033570	0.541148	0.117762
HORVU0Hr1G033600	-0.637476	0.646745
HORVU0Hr1G033630	-0.33513	0.42824
HORVU0Hr1G033640	0	-
HORVU0Hr1G033660	0.279737	0.327774
HORVU0Hr1G033670	0	-
HORVU0Hr1G033690	-1.00518	0.146718
HORVU0Hr1G033700	-0.544919	0.459129
HORVU0Hr1G033710	-0.539996	0.3778
HORVU0Hr1G033720	-0.847462	0.0985854
HORVU0Hr1G033730	0.326624	0.421682
HORVU0Hr1G033740	-0.198691	0.776468
HORVU0Hr1G033750	0.0445265	0.967886
HORVU0Hr1G033770	-0.157376	0.814713
HORVU0Hr1G033790	0.470747	0.544638
HORVU0Hr1G033800	0.272437	0.66594
HORVU0Hr1G033810	0.57476	0.236066
HORVU0Hr1G033820	0.305757	0.592529
HORVU0Hr1G033850	0.295541	0.785354
HORVU0Hr1G033860	-1.55569	0.154685
HORVU0Hr1G033870	-0.735002	0.591178
HORVU0Hr1G033880	0.221102	0.896171
HORVU0Hr1G033890	0	-
HORVU0Hr1G033900	-0.146292	0.819095
HORVU0Hr1G033940	0	-
HORVU0Hr1G033970	-0.637476	0.646745
HORVU0Hr1G033990	-1.84279	0.0260094
HORVU0Hr1G034000	-1.38344	0.154685
HORVU0Hr1G034010	0.541148	0.117762
HORVU0Hr1G034040	-0.706943	0.122097
HORVU0Hr1G034050	-1.84279	0.0260094
HORVU0Hr1G034080	0	-
HORVU0Hr1G034090	0	-
HORVU0Hr1G034110	0	-
HORVU0Hr1G034120	0	-
HORVU0Hr1G034130	0	-
HORVU0Hr1G034150	-0.502112	0.475816
HORVU0Hr1G034160	-0.992351	0.140314
HORVU0Hr1G034190	-1.27387	0.304476
HORVU0Hr1G034210	0.531948	0.469731
HORVU0Hr1G034240	-0.817655	0.273184
HORVU0Hr1G034250	0.188554	0.599619
HORVU0Hr1G034260	0.822362	0.258253
HORVU0Hr1G034280	0.658899	0.597683
HORVU0Hr1G034290	-0.397483	0.519139
HORVU0Hr1G034300	-0.30367	0.752176
HORVU0Hr1G034320	0.861986	0.255828
HORVU0Hr1G034330	0.0445265	0.967886
HORVU0Hr1G034340	-0.775525	0.112292
HORVU0Hr1G034350	0.308199	0.403689
HORVU0Hr1G034370	-0.684047	0.311641
HORVU0Hr1G034380	0.370157	0.395131
HORVU0Hr1G034420	-1.36291	0.165197
HORVU0Hr1G034430	-1.38137	0.155657
HORVU0Hr1G034460	0.361117	0.391773
HORVU0Hr1G034470	-1.16149	0.0999566
HORVU0Hr1G034480	-0.425527	0.498407
HORVU0Hr1G034500	0.240557	0.809479
HORVU0Hr1G034510	-0.771234	0.557131
HORVU0Hr1G034520	0.168929	0.836573
HORVU0Hr1G034540	0.696463	0.196864
HORVU0Hr1G034550	0.495293	0.249852
HORVU0Hr1G034600	-0.709193	0.130097
HORVU0Hr1G034610	0.402334	0.544108
HORVU0Hr1G034630	-0.653644	0.316891
HORVU0Hr1G034640	-0.511705	0.454482
HORVU0Hr1G034650	-0.899245	0.256507
HORVU0Hr1G034660	-1.63362	0.063049
HORVU0Hr1G034700	-0.0226294	0.980137
HORVU0Hr1G034720	-0.905691	0.0465403
HORVU0Hr1G034730	-0.105038	0.767594
HORVU0Hr1G034740	-0.459253	0.526864
HORVU0Hr1G034750	-0.30367	0.752176
HORVU0Hr1G034770	-0.105038	0.767594
HORVU0Hr1G034780	0.510267	0.475062
HORVU0Hr1G034790	0.400074	0.376292
HORVU0Hr1G034800	0.566447	0.334922
HORVU0Hr1G034830	-0.134925	0.731739
HORVU0Hr1G034850	-0.967309	0.1412
HORVU0Hr1G034860	-0.684819	0.612558
HORVU0Hr1G034900	0	-
HORVU0Hr1G034910	0	-
HORVU0Hr1G034930	-0.237874	0.771928
HORVU0Hr1G034940	-0.295039	0.706475
HORVU0Hr1G034950	-0.22562	0.796932
HORVU0Hr1G034960	-0.631253	0.185251
HORVU0Hr1G034970	-0.285588	0.741822
HORVU0Hr1G034980	-0.504469	0.390735
HORVU0Hr1G035010	0	-
HORVU0Hr1G035030	-0.587571	0.580464
HORVU0Hr1G035060	0	-
HORVU0Hr1G035110	0	-
HORVU0Hr1G035140	0	-
HORVU0Hr1G035160	-0.765919	0.0951607
HORVU0Hr1G035170	0.361117	0.391773
HORVU0Hr1G035180	-0.198691	0.776468
HORVU0Hr1G035190	0.0445265	0.967886
HORVU0Hr1G035200	0.658899	0.597683
HORVU0Hr1G035230	-0.600101	0.653172
HORVU0Hr1G035250	0.541148	0.117762
HORVU0Hr1G035260	-1.38344	0.154685
HORVU0Hr1G035270	-1.84279	0.0260094
HORVU0Hr1G035280	-0.537215	0.47378
HORVU0Hr1G035290	-0.469505	0.505602
HORVU0Hr1G035300	-0.637476	0.646745
HORVU0Hr1G035310	-0.742228	0.0861335
HORVU0Hr1G035320	-1.13214	0.0430199
HORVU0Hr1G035340	-1.32011	0.374257
HORVU0Hr1G035420	0	-
HORVU0Hr1G035430	0	-
HORVU0Hr1G035440	0	-
HORVU0Hr1G035460	-0.0601128	0.949499
HORVU0Hr1G035470	-0.0698183	0.937291
HORVU0Hr1G035530	-0.141848	0.876008
HORVU0Hr1G035540	0	-
HORVU0Hr1G035560	0.781104	0.00285724
HORVU0Hr1G035570	0	-
[truncated: 37,842 more rows]

## Sheet: lb_wt-ls_wt
gene	log2(FC)	FDR
AGP50735	0.273526	0.483003
AGP50736	0.410317	0.638453
AGP50737	0.460124	0.186977
AGP50738	-0.213226	0.827217
AGP50739	-0.292937	0.818524
AGP50740	0.0113959	0.966245
AGP50741	-0.0456543	0.862061
AGP50742	-0.186582	0.880033
AGP50743	0.905713	0.152517
AGP50744	0.314876	0.78104
AGP50745	0.688893	0.219054
AGP50746	0.460416	0.435038
AGP50747	0.260293	0.705397
AGP50748	-0.120059	0.880123
AGP50749	-0.323115	0.527396
AGP50750	-0.715823	0.187139
AGP50751	0.194729	0.624442
AGP50752	-0.422881	0.202707
AGP50753	0.514851	0.037062
AGP50754	0.436284	0.101
AGP50755	0.25917	0.456232
AGP50756	-0.493467	0.332351
AGP50757	-0.888555	0.194023
AGP50758	0.448034	0.34513
AGP50759	0.554826	0.167267
AGP50760	0.386263	0.373221
AGP50761	-0.204529	0.697779
AGP50762	-0.143129	0.814178
AGP50763	-0.690513	0.222169
AGP50764	0	-
AGP50765	-0.409306	0.472111
AGP50766	0.122618	0.870909
AGP50767	-0.276257	0.549286
AGP50768	-0.0632214	0.88626
AGP50769	-0.100701	0.873024
AGP50770	-0.507519	0.284071
AGP50771	-0.349519	0.477216
AGP50772	-0.57416	0.601435
AGP50773	0.484337	0.57912
AGP50774	0.0216699	0.986548
AGP50775	0.029139	0.977862
AGP50776	1.08991	0.246667
AGP50777	-0.103217	0.875543
AGP50779	0.551493	0.153807
AGP50780	-0.205385	0.50236
AGP50781	0.784599	0.308062
AGP50782	0.0137479	0.986902
AGP50783	-0.077661	0.859766
AGP50784	0.0344502	0.920212
AGP50785	0.0117989	0.978877
AGP50786	-0.0260969	0.968348
AGP50787	0.00622606	0.993051
AGP50788	0.287181	0.758748
AGP50789	0.25097	0.6828
AGP50790	0.527724	0.422082
AGP50791	-0.146586	0.849744
AGP50792	-0.283968	0.623153
AGP50793	0.295467	0.682553
AGP50794	-0.286379	0.635028
AGP50795	-0.680667	0.10444
AGP50796	-0.760612	0.171442
AGP50797	-0.321971	0.681467
AGP50798	-0.248465	0.563167
AGP50799	-0.0557787	0.863256
AGP50800	0.374516	0.761509
AGP50801	-0.0502578	0.887643
AGP50802	-0.0742726	0.910472
AGP50803	-0.937282	0.400438
AGP50804	0.435078	0.476628
AGP50805	0.187461	0.784561
AGP50806	-0.0932504	0.794503
AGP50807	-0.379857	0.671498
AGP50808	0.00150308	0.999367
AGP50809	0.283022	0.662504
AGP50810	0.101114	0.909909
EPlHVUG00000039848	0	-
EPlHVUG00000039849	0.178008	0.80418
EPlHVUG00000039850	-0.35506	0.505353
EPlHVUG00000039851	-0.325098	0.624031
EPlHVUG00000039852	-0.675323	0.344951
EPlHVUG00000039853	-0.387663	0.459772
EPlHVUG00000039855	0	-
EPlHVUG00000039856	-0.0555645	0.929213
EPlHVUG00000039857	0.0402603	0.97578
EPlHVUG00000039858	0	-
EPlHVUG00000039861	0.107994	0.903646
EPlHVUG00000039863	-0.370542	0.409624
EPlHVUG00000039864	-0.231129	0.687912
EPlHVUG00000039865	0	-
EPlHVUG00000039867	0.0272083	0.974128
EPlHVUG00000039869	0	-
EPlHVUG00000039870	1.06751	0.0838206
EPlHVUG00000039871	0.329387	0.515937
EPlHVUG00000039873	-0.333315	0.720597
EPlHVUG00000039875	-0.363626	0.558142
EPlHVUG00000039877	0	-
EPlHVUG00000039878	0	-
EPlHVUG00000039879	0.206491	0.594632
EPlHVUG00000039880	-0.576452	0.344114
EPlHVUG00000039881	-1.02692	0.0401815
EPlHVUG00000039882	0	-
EPlHVUG00000039883	0.965771	0.269154
EPlHVUG00000039888	-1.35714	0.0972627
EPlHVUG00000039890	1.37135	0.042295
EPlHVUG00000039891	0.752128	0.171367
EPlHVUG00000039893	-0.576452	0.344114
EPlHVUG00000039894	0	-
HORVU0Hr1G000020	0.497286	0.0444877
HORVU0Hr1G000030	0.498201	0.0440486
HORVU0Hr1G000050	0.658748	0.112558
HORVU0Hr1G000080	0.242211	0.348166
HORVU0Hr1G000100	-0.299282	0.446859
HORVU0Hr1G000120	0	-
HORVU0Hr1G000130	0.553161	0.544312
HORVU0Hr1G000160	-0.799429	0.011555
HORVU0Hr1G000200	0.0658156	0.880025
HORVU0Hr1G000230	0	-
HORVU0Hr1G000250	0.845699	0.0542232
HORVU0Hr1G000270	1.02672	0.00755238
HORVU0Hr1G000280	0.585238	0.0595039
HORVU0Hr1G000290	0	-
HORVU0Hr1G000300	0	-
HORVU0Hr1G000320	-1.40642	0.00362178
HORVU0Hr1G000340	-1.85989	0.106163
HORVU0Hr1G000350	-0.958027	0.10599
HORVU0Hr1G000360	-0.533933	0.558142
HORVU0Hr1G000370	-0.314801	0.499959
HORVU0Hr1G000390	-0.65408	0.0721841
HORVU0Hr1G000410	0.0777715	0.656489
HORVU0Hr1G000420	1.40082	0.0334552
HORVU0Hr1G000430	-0.00275061	0.998218
HORVU0Hr1G000450	0.605785	0.0447002
HORVU0Hr1G000490	0.556145	0.0637071
HORVU0Hr1G000500	0	-
HORVU0Hr1G000510	0.481498	0.12705
HORVU0Hr1G000600	0.0789853	0.593543
HORVU0Hr1G000620	-1.66191	0.034693
HORVU0Hr1G000630	0.112413	0.611273
HORVU0Hr1G000640	0	-
HORVU0Hr1G000650	-2.64894	0.00692535
HORVU0Hr1G000660	-0.622855	0.0271366
HORVU0Hr1G000670	-2.05101	0.00928379
HORVU0Hr1G000710	0.100238	0.578027
HORVU0Hr1G000720	0	-
HORVU0Hr1G000730	0	-
HORVU0Hr1G000740	0	-
HORVU0Hr1G000760	1.58828	0.207815
HORVU0Hr1G000780	-1.5279	0.249732
HORVU0Hr1G000810	-0.916822	0.695183
HORVU0Hr1G000840	0.928248	0.222542
HORVU0Hr1G000850	1.06565	0.326066
HORVU0Hr1G000890	0.559822	0.450978
HORVU0Hr1G000900	0.326666	0.637016
HORVU0Hr1G000910	-2.52071	0.000203543
HORVU0Hr1G000930	-0.451408	0.00279497
HORVU0Hr1G000940	0.287327	0.264094
HORVU0Hr1G000950	-0.612868	0.173074
HORVU0Hr1G000960	0.0771143	0.882828
HORVU0Hr1G000990	0.340317	0.665555
HORVU0Hr1G001040	0.529075	0.609354
HORVU0Hr1G001050	0.534702	0.0176152
HORVU0Hr1G001070	-0.189023	0.662472
HORVU0Hr1G001110	0.737142	0.310153
HORVU0Hr1G001120	0.180707	0.632105
HORVU0Hr1G001140	0	-
HORVU0Hr1G001150	0	-
HORVU0Hr1G001160	-0.0970124	0.854702
HORVU0Hr1G001170	0.535346	0.0901674
HORVU0Hr1G001180	0.0866977	0.69236
HORVU0Hr1G001190	0.035247	0.95442
HORVU0Hr1G001200	0	-
HORVU0Hr1G001230	-0.0431258	0.923797
HORVU0Hr1G001240	0.749952	0.027917
HORVU0Hr1G001270	0.658001	0.0354241
HORVU0Hr1G001280	-0.616572	0.211985
HORVU0Hr1G001300	0.517997	0.0210346
HORVU0Hr1G001340	0.575159	0.0135316
HORVU0Hr1G001350	-0.323161	0.213028
HORVU0Hr1G001370	-0.344201	0.249371
HORVU0Hr1G001390	0.687353	0.0318564
HORVU0Hr1G001400	-0.0611404	0.748701
HORVU0Hr1G001420	-0.49854	0.285535
HORVU0Hr1G001430	0.700846	0.479045
HORVU0Hr1G001440	0.473627	0.0188745
HORVU0Hr1G001450	0.48137	0.0591444
HORVU0Hr1G001460	0.41726	0.0856185
HORVU0Hr1G001470	0	-
HORVU0Hr1G001480	-4.27962	0.112541
HORVU0Hr1G001490	0.134075	0.766089
HORVU0Hr1G001500	-0.554612	0.0682639
HORVU0Hr1G001510	-0.349539	0.161327
HORVU0Hr1G001520	0	-
HORVU0Hr1G001530	-0.14553	0.677156
HORVU0Hr1G001570	-0.00250604	0.992085
HORVU0Hr1G001580	-0.856563	0.0621986
HORVU0Hr1G001600	-0.95285	0.0476254
HORVU0Hr1G001610	0	-
HORVU0Hr1G001630	-0.235503	0.355622
HORVU0Hr1G001640	-0.708712	0.0252456
HORVU0Hr1G001680	0.690963	0.370844
HORVU0Hr1G001690	0.652855	0.242529
HORVU0Hr1G001750	-0.336384	0.102577
HORVU0Hr1G001760	0.308313	0.257382
HORVU0Hr1G001770	0	-
HORVU0Hr1G001780	0	-
HORVU0Hr1G001800	-14.2985	0.000475919
HORVU0Hr1G001810	0	-
HORVU0Hr1G001820	0	-
HORVU0Hr1G001840	-0.256584	0.779317
HORVU0Hr1G001870	0	-
HORVU0Hr1G001880	0	-
HORVU0Hr1G001900	0	-
HORVU0Hr1G001920	0	-
HORVU0Hr1G001960	0	-
HORVU0Hr1G001980	0	-
HORVU0Hr1G002020	-1.24224	0.0543798
HORVU0Hr1G002030	0	-
HORVU0Hr1G002040	0	-
HORVU0Hr1G002060	0	-
HORVU0Hr1G002080	0.35113	0.793868
HORVU0Hr1G002090	-0.403057	0.731592
HORVU0Hr1G002110	0.144392	0.880291
HORVU0Hr1G002120	0.163065	0.888977
HORVU0Hr1G002220	0.118956	0.486386
HORVU0Hr1G002250	0.623866	0.282897
HORVU0Hr1G002270	0	-
HORVU0Hr1G002290	0	-
HORVU0Hr1G002300	-0.543092	0.500816
HORVU0Hr1G002320	0	-
HORVU0Hr1G002340	0.807646	0.011689
HORVU0Hr1G002360	0	-
HORVU0Hr1G002390	1.31119	0.260637
HORVU0Hr1G002410	0.956322	0.396001
HORVU0Hr1G002450	0	-
HORVU0Hr1G002460	0	-
HORVU0Hr1G002480	1.8751	0.00385472
HORVU0Hr1G002500	1.85372	0.00224719
HORVU0Hr1G002520	-0.309655	0.495688
HORVU0Hr1G002530	1.82138	0.00557345
HORVU0Hr1G002580	-1.69671	0.0174199
HORVU0Hr1G002600	0.66542	0.0603413
HORVU0Hr1G002620	0	-
HORVU0Hr1G002630	0	-
HORVU0Hr1G002640	-0.643957	0.582549
HORVU0Hr1G002680	-0.214517	0.280816
HORVU0Hr1G002690	0.0853695	0.883615
HORVU0Hr1G002710	-0.0860167	0.949175
HORVU0Hr1G002720	0.372964	0.056961
HORVU0Hr1G002730	0.147585	0.469951
HORVU0Hr1G002760	0	-
HORVU0Hr1G002770	0	-
HORVU0Hr1G002800	0	-
HORVU0Hr1G002810	0	-
HORVU0Hr1G002840	0	-
HORVU0Hr1G002870	0.239721	0.882541
HORVU0Hr1G002880	0	-
HORVU0Hr1G002920	0.00896769	0.990837
HORVU0Hr1G002930	1.90964	0.0186837
HORVU0Hr1G002940	1.07403	0.249524
HORVU0Hr1G002950	-1.20722	0.0178843
HORVU0Hr1G002960	-0.387295	0.182937
HORVU0Hr1G002990	-0.68124	0.383258
HORVU0Hr1G003000	0.647514	0.039243
HORVU0Hr1G003010	-0.234077	0.520253
HORVU0Hr1G003020	-0.211374	0.202799
HORVU0Hr1G003030	0	-
HORVU0Hr1G003040	0.302026	0.118589
HORVU0Hr1G003080	-0.637676	0.577329
HORVU0Hr1G003110	-2.88046	0.00958539
HORVU0Hr1G003140	0	-
HORVU0Hr1G003170	0	-
HORVU0Hr1G003180	0	-
HORVU0Hr1G003190	-3.09201	0.00052196
HORVU0Hr1G003200	-0.500059	0.162315
HORVU0Hr1G003210	0.0786662	0.871085
HORVU0Hr1G003220	1.40071	0.0590542
HORVU0Hr1G003230	-0.786506	0.0364306
HORVU0Hr1G003260	-0.54227	0.139631
HORVU0Hr1G003270	0.110321	0.810423
HORVU0Hr1G003280	-0.683965	0.532375
HORVU0Hr1G003300	0	-
HORVU0Hr1G003320	-0.0326086	0.965143
HORVU0Hr1G003330	-0.204258	0.578604
HORVU0Hr1G003340	-1.51405	0.00478464
HORVU0Hr1G003380	0.208661	0.207876
HORVU0Hr1G003440	0.420617	0.316357
HORVU0Hr1G003480	-5.4534	0.00452032
HORVU0Hr1G003490	-0.194524	0.375182
HORVU0Hr1G003520	0	-
HORVU0Hr1G003540	0.00519808	0.983946
HORVU0Hr1G003660	-0.66492	0.227425
HORVU0Hr1G003700	0	-
HORVU0Hr1G003720	0.929888	0.313956
HORVU0Hr1G003770	0	-
HORVU0Hr1G003790	0	-
HORVU0Hr1G003810	1.68563	0.00776933
HORVU0Hr1G003840	0	-
HORVU0Hr1G003850	0.484213	0.434619
HORVU0Hr1G003870	-0.547336	0.0662402
HORVU0Hr1G003880	0	-
HORVU0Hr1G003890	0.526966	0.404426
HORVU0Hr1G003900	0.0334678	0.970133
HORVU0Hr1G003910	-0.374907	0.368107
HORVU0Hr1G003920	0.388657	0.828035
HORVU0Hr1G003930	-0.406216	0.704991
HORVU0Hr1G003950	0.00472169	0.995827
HORVU0Hr1G003980	1.71885	0.0267333
HORVU0Hr1G004040	0.363274	0.470219
HORVU0Hr1G004060	0.270969	0.594013
HORVU0Hr1G004120	-0.38771	0.09551
HORVU0Hr1G004130	0.386647	0.111298
HORVU0Hr1G004140	0	-
HORVU0Hr1G004150	0.069756	0.84489
HORVU0Hr1G004160	-0.018926	0.96164
HORVU0Hr1G004200	0.201853	0.391566
HORVU0Hr1G004250	0	-
HORVU0Hr1G004270	-0.118757	0.721568
HORVU0Hr1G004300	-0.457319	0.398048
HORVU0Hr1G004320	0.214731	0.708569
HORVU0Hr1G004330	0.540455	0.0335083
HORVU0Hr1G004350	-0.115819	0.708624
HORVU0Hr1G004380	0	-
HORVU0Hr1G004400	0.0082978	0.981548
HORVU0Hr1G004410	-6.3871	0.00260659
HORVU0Hr1G004420	-0.142083	0.486039
HORVU0Hr1G004430	-0.348386	0.0573937
HORVU0Hr1G004470	-0.13084	0.770404
HORVU0Hr1G004480	0.148616	0.672919
HORVU0Hr1G004510	-0.247393	0.672646
HORVU0Hr1G004530	0	-
HORVU0Hr1G004610	0	-
HORVU0Hr1G004630	0	-
HORVU0Hr1G004640	0	-
HORVU0Hr1G004650	-3.13391	0.0688411
HORVU0Hr1G004670	1.44483	0.135067
HORVU0Hr1G004680	0	-
HORVU0Hr1G004690	-0.178749	0.778497
HORVU0Hr1G004700	0.252297	0.504299
HORVU0Hr1G004730	-0.0236321	0.981841
HORVU0Hr1G004740	-0.100451	0.910593
HORVU0Hr1G004750	0	-
HORVU0Hr1G004790	0.409278	0.0879769
HORVU0Hr1G004800	1.00036	0.0381585
HORVU0Hr1G004830	0.102988	0.873695
HORVU0Hr1G004850	-1.42339	0.0235024
HORVU0Hr1G004870	0.96369	0.0177983
HORVU0Hr1G004890	-0.669076	0.458138
HORVU0Hr1G004900	0	-
HORVU0Hr1G004910	0.861693	0.305615
HORVU0Hr1G004960	-0.204563	0.285976
HORVU0Hr1G004970	0.201036	0.165712
HORVU0Hr1G004980	0.819966	0.0789613
HORVU0Hr1G004990	0.863669	0.0119822
HORVU0Hr1G005000	-0.215872	0.528436
HORVU0Hr1G005010	0	-
HORVU0Hr1G005020	0.161845	0.643067
HORVU0Hr1G005050	-0.300437	0.701407
HORVU0Hr1G005060	-1.38115	0.40354
HORVU0Hr1G005070	0.430401	0.240357
HORVU0Hr1G005090	0	-
HORVU0Hr1G005100	1.72264	0.0182162
HORVU0Hr1G005120	0	-
HORVU0Hr1G005130	0	-
HORVU0Hr1G005140	-0.344412	0.424248
HORVU0Hr1G005150	-3.14098	0.00145153
HORVU0Hr1G005160	2.67015	0.00222812
HORVU0Hr1G005180	0	-
HORVU0Hr1G005200	0	-
HORVU0Hr1G005210	-0.14147	0.914337
HORVU0Hr1G005230	0.903339	0.0939032
HORVU0Hr1G005240	-2.87762	0.00045654
HORVU0Hr1G005250	0	-
HORVU0Hr1G005260	-0.932264	0.0413216
HORVU0Hr1G005290	-0.578907	0.072332
HORVU0Hr1G005300	4.42012	0.00878876
HORVU0Hr1G005320	-1.12103	0.0530293
HORVU0Hr1G005330	-1.60757	0.00208781
HORVU0Hr1G005350	-2.80165	0.0415992
HORVU0Hr1G005360	-6.47342	0.00148452
HORVU0Hr1G005380	-1.61362	0.00522729
HORVU0Hr1G005400	0.643729	0.37931
HORVU0Hr1G005410	0	-
HORVU0Hr1G005420	1.95821	0.0253475
HORVU0Hr1G005430	0.339071	0.632706
HORVU0Hr1G005480	0	-
HORVU0Hr1G005490	0	-
HORVU0Hr1G005500	-0.759386	0.0912449
HORVU0Hr1G005510	-0.556722	0.153571
HORVU0Hr1G005520	-0.456679	0.217981
HORVU0Hr1G005540	-0.107307	0.92264
HORVU0Hr1G005550	0.0734954	0.953721
HORVU0Hr1G005560	0	-
HORVU0Hr1G005570	0.172522	0.467586
HORVU0Hr1G005590	0	-
HORVU0Hr1G005600	0	-
HORVU0Hr1G005610	0	-
HORVU0Hr1G005620	0	-
HORVU0Hr1G005640	0	-
HORVU0Hr1G005660	0	-
HORVU0Hr1G005670	-0.27173	0.435977
HORVU0Hr1G005680	0	-
HORVU0Hr1G005690	0	-
HORVU0Hr1G005700	0	-
HORVU0Hr1G005720	0.0398448	0.892284
HORVU0Hr1G005730	0	-
HORVU0Hr1G005750	0.0310583	0.947662
HORVU0Hr1G005770	-0.720723	0.0163602
HORVU0Hr1G005790	0.169527	0.437911
HORVU0Hr1G005820	0.035196	0.918733
HORVU0Hr1G005840	-0.319983	0.342766
HORVU0Hr1G005850	-0.553364	0.342194
HORVU0Hr1G005860	-0.661895	0.299437
HORVU0Hr1G005870	-0.42769	0.551663
HORVU0Hr1G005890	-1.45878	0.00387485
HORVU0Hr1G005900	-1.69904	0.00164848
HORVU0Hr1G005910	-1.74046	0.0122695
HORVU0Hr1G005920	-0.342399	0.0766202
HORVU0Hr1G005960	-0.0693446	0.788704
HORVU0Hr1G005970	0	-
HORVU0Hr1G006020	0.27352	0.380406
HORVU0Hr1G006040	0.206124	0.580255
HORVU0Hr1G006050	0.46602	0.375558
HORVU0Hr1G006070	-0.00318177	0.995389
HORVU0Hr1G006080	0.387364	0.272048
HORVU0Hr1G006090	0	-
HORVU0Hr1G006100	0	-
HORVU0Hr1G006120	0	-
HORVU0Hr1G006130	0	-
HORVU0Hr1G006140	2.43009	0.0129332
HORVU0Hr1G006150	1.86833	0.0215259
HORVU0Hr1G006160	2.43009	0.0139416
HORVU0Hr1G006170	-0.151828	0.939377
HORVU0Hr1G006190	0.0351306	0.912484
HORVU0Hr1G006210	0	-
HORVU0Hr1G006240	0.806243	0.0167546
HORVU0Hr1G006250	0.317436	0.289254
HORVU0Hr1G006260	0	-
HORVU0Hr1G006270	0	-
HORVU0Hr1G006280	0	-
HORVU0Hr1G006290	-1.34521	0.270228
HORVU0Hr1G006300	0	-
HORVU0Hr1G006330	0	-
HORVU0Hr1G006340	0	-
HORVU0Hr1G006350	0.668341	0.0604227
HORVU0Hr1G006360	1.2777	0.012839
HORVU0Hr1G006370	0	-
HORVU0Hr1G006380	0	-
HORVU0Hr1G006410	-0.181298	0.735859
HORVU0Hr1G006420	-0.147992	0.853293
HORVU0Hr1G006430	0.198363	0.78597
HORVU0Hr1G006440	-0.184005	0.533822
HORVU0Hr1G006450	0	-
HORVU0Hr1G006460	0.528128	0.079573
HORVU0Hr1G006470	0	-
HORVU0Hr1G006520	-0.377976	0.815003
HORVU0Hr1G006550	0	-
HORVU0Hr1G006560	0	-
HORVU0Hr1G006580	0	-
HORVU0Hr1G006600	-0.557637	0.571736
HORVU0Hr1G006620	-0.122948	0.936736
HORVU0Hr1G006630	0.262885	0.25877
HORVU0Hr1G006640	0.0124674	0.971153
HORVU0Hr1G006680	0.516443	0.130198
HORVU0Hr1G006720	0.128044	0.719444
HORVU0Hr1G006740	-0.329768	0.140289
HORVU0Hr1G006750	-1.64281	0.000500455
HORVU0Hr1G006770	0	-
HORVU0Hr1G006790	0.185917	0.591085
HORVU0Hr1G006800	0.450379	0.190373
HORVU0Hr1G006810	0	-
HORVU0Hr1G006830	0.371513	0.547138
HORVU0Hr1G006890	-0.261764	0.801839
HORVU0Hr1G006920	0	-
HORVU0Hr1G006930	0.324199	0.269782
HORVU0Hr1G006940	0.092184	0.932363
HORVU0Hr1G006950	0.336738	0.0591696
HORVU0Hr1G006960	0.137014	0.393926
HORVU0Hr1G006980	-0.131503	0.907915
HORVU0Hr1G007000	-0.0408123	0.880238
HORVU0Hr1G007020	0.135282	0.893269
HORVU0Hr1G007030	-0.508904	0.392088
HORVU0Hr1G007050	-0.285101	0.703979
HORVU0Hr1G007070	0.117028	0.637574
HORVU0Hr1G007090	0	-
HORVU0Hr1G007100	0	-
HORVU0Hr1G007110	0.476725	0.0139468
HORVU0Hr1G007130	-2.0016	0.070291
HORVU0Hr1G007150	0.153507	0.529105
HORVU0Hr1G007170	0	-
HORVU0Hr1G007190	0	-
HORVU0Hr1G007210	0	-
HORVU0Hr1G007220	-0.211451	0.599835
HORVU0Hr1G007240	0	-
HORVU0Hr1G007260	0	-
HORVU0Hr1G007280	0	-
HORVU0Hr1G007320	0.377046	0.140311
HORVU0Hr1G007330	0	-
HORVU0Hr1G007340	0.0407049	0.985747
HORVU0Hr1G007360	-0.372292	0.351595
HORVU0Hr1G007370	0.989108	0.498606
HORVU0Hr1G007380	-0.841415	0.0201583
HORVU0Hr1G007410	-0.297078	0.288908
HORVU0Hr1G007420	-0.644319	0.0795178
HORVU0Hr1G007430	0	-
HORVU0Hr1G007450	4.05326	0.00107278
HORVU0Hr1G007460	-0.475384	0.148032
HORVU0Hr1G007470	-2.41995	0.180005
HORVU0Hr1G007480	-2.37112	0.0199367
HORVU0Hr1G007520	0	-
HORVU0Hr1G007540	-0.0734817	0.903499
HORVU0Hr1G007580	0	-
HORVU0Hr1G007620	1.85561	0.0306416
HORVU0Hr1G007630	0.13564	0.824733
HORVU0Hr1G007640	0	-
HORVU0Hr1G007650	-0.188368	0.554245
HORVU0Hr1G007680	1.85426	0.00130229
HORVU0Hr1G007690	1.85383	0.00129977
HORVU0Hr1G007700	-0.265412	0.249396
HORVU0Hr1G007720	0	-
HORVU0Hr1G007730	0	-
HORVU0Hr1G007740	-2.36399	0.018511
HORVU0Hr1G007760	0.135843	0.869847
HORVU0Hr1G007770	-0.376119	0.484577
HORVU0Hr1G007790	-0.15644	0.653751
HORVU0Hr1G007820	0.0170111	0.959013
HORVU0Hr1G007830	0.0678058	0.927058
HORVU0Hr1G007860	0.191487	0.597275
HORVU0Hr1G007870	0	-
HORVU0Hr1G007880	-0.356726	0.302045
HORVU0Hr1G007890	0.0190968	0.956281
HORVU0Hr1G007930	0.176896	0.561986
HORVU0Hr1G007960	-0.580977	0.26875
HORVU0Hr1G008030	-0.18027	0.749949
HORVU0Hr1G008040	-0.384591	0.463498
HORVU0Hr1G008050	0.0526714	0.969217
HORVU0Hr1G008060	-0.387807	0.128256
HORVU0Hr1G008070	-0.37705	0.127938
HORVU0Hr1G008080	-0.406319	0.127667
HORVU0Hr1G008280	0.0221702	0.943324
HORVU0Hr1G008350	0	-
HORVU0Hr1G008360	0.367131	0.142349
HORVU0Hr1G008370	0	-
HORVU0Hr1G008390	0	-
HORVU0Hr1G008400	0	-
HORVU0Hr1G008470	0.424826	0.0567858
HORVU0Hr1G008550	-0.106411	0.604633
HORVU0Hr1G008580	-2.67286	0.000968798
HORVU0Hr1G008590	-0.214034	0.360313
HORVU0Hr1G008610	0	-
HORVU0Hr1G008620	0.00253339	0.994355
HORVU0Hr1G008640	-0.534673	0.10456
HORVU0Hr1G008650	-0.0742166	0.86263
HORVU0Hr1G008670	-0.217108	0.601934
HORVU0Hr1G008690	0.44316	0.22904
HORVU0Hr1G008700	-0.584715	0.0250794
HORVU0Hr1G008740	1.0815	0.00971408
HORVU0Hr1G008750	0.229547	0.654527
HORVU0Hr1G008780	-0.0520201	0.936852
HORVU0Hr1G008790	0.244964	0.426922
HORVU0Hr1G008800	0.229547	0.654527
HORVU0Hr1G008810	-0.0708276	0.835973
HORVU0Hr1G008830	3.8465	0.013453
HORVU0Hr1G008840	-0.259562	0.546291
HORVU0Hr1G008850	-0.449205	0.426982
HORVU0Hr1G008860	0.231226	0.278318
HORVU0Hr1G008870	-0.662805	0.0247215
HORVU0Hr1G008880	0.144921	0.388509
HORVU0Hr1G008920	-1.45403	0.00692296
HORVU0Hr1G008940	0.355236	0.229433
HORVU0Hr1G008950	-0.931234	0.384212
HORVU0Hr1G008960	6.61709	0.0144641
HORVU0Hr1G008970	0.699454	0.00194013
HORVU0Hr1G008980	0.758804	0.0182222
HORVU0Hr1G008990	-0.644044	0.249524
HORVU0Hr1G009030	0.452877	0.162004
HORVU0Hr1G009040	0.574072	0.101351
HORVU0Hr1G009050	1.72716	0.000840072
HORVU0Hr1G009060	-1.49497	0.067751
HORVU0Hr1G009070	1.39062	0.149975
HORVU0Hr1G009080	0.293437	0.149831
HORVU0Hr1G009100	0	-
HORVU0Hr1G009120	-0.00152877	0.999528
HORVU0Hr1G009140	0.781515	0.0207809
HORVU0Hr1G009150	0.791074	0.0194717
HORVU0Hr1G009170	0.208208	0.45071
HORVU0Hr1G009180	0	-
HORVU0Hr1G009230	0	-
HORVU0Hr1G009250	0	-
HORVU0Hr1G009270	0	-
HORVU0Hr1G009280	-1.83939	0.00924006
HORVU0Hr1G009310	0	-
HORVU0Hr1G009320	3.30936	0.00527445
HORVU0Hr1G009330	0	-
HORVU0Hr1G009340	3.30936	0.00527445
HORVU0Hr1G009350	3.30936	0.00527445
HORVU0Hr1G009370	0.647338	0.49106
HORVU0Hr1G009380	0.310345	0.338926
HORVU0Hr1G009390	-0.274623	0.883611
HORVU0Hr1G009400	0.182143	0.898291
HORVU0Hr1G009410	3.73309	0.0173242
HORVU0Hr1G009420	-0.227353	0.871434
HORVU0Hr1G009440	-0.229064	0.888613
HORVU0Hr1G009450	-0.273969	0.883448
HORVU0Hr1G009460	0.446308	0.483134
HORVU0Hr1G009470	2.41062	0.0631753
HORVU0Hr1G009480	-1.62657	0.0289196
HORVU0Hr1G009530	0.498907	0.417562
HORVU0Hr1G009540	0	-
HORVU0Hr1G009550	-0.632428	0.00553463
HORVU0Hr1G009560	-0.668784	0.0222117
HORVU0Hr1G009600	0	-
HORVU0Hr1G009680	-0.85122	0.209317
HORVU0Hr1G009740	0.0727577	0.934322
HORVU0Hr1G009770	-0.602254	0.150007
HORVU0Hr1G009780	-0.133562	0.817458
HORVU0Hr1G009800	0	-
HORVU0Hr1G009840	0	-
HORVU0Hr1G009850	-1.14155	0.0199367
HORVU0Hr1G009860	-3.28236	0.00416336
HORVU0Hr1G009870	-0.742101	0.0034412
HORVU0Hr1G009880	0	-
HORVU0Hr1G009900	-0.0610083	0.977445
HORVU0Hr1G009910	-0.00264728	0.992042
HORVU0Hr1G009930	-0.0219637	0.981232
HORVU0Hr1G009960	0	-
HORVU0Hr1G009970	0	-
HORVU0Hr1G010000	0.023068	0.965943
HORVU0Hr1G010010	-1.30252	0.191382
HORVU0Hr1G010020	0.209243	0.47247
HORVU0Hr1G010040	-0.925955	0.101341
HORVU0Hr1G010050	-0.254821	0.625532
HORVU0Hr1G010070	0	-
HORVU0Hr1G010080	-1.18343	0.393408
HORVU0Hr1G010120	0	-
HORVU0Hr1G010160	-0.802101	0.469663
HORVU0Hr1G010170	-0.140819	0.605236
HORVU0Hr1G010180	0	-
HORVU0Hr1G010190	2.62482	0.0166835
HORVU0Hr1G010200	4.60247	0.000274364
HORVU0Hr1G010210	0	-
HORVU0Hr1G010220	-0.56934	0.135001
HORVU0Hr1G010230	-0.00797324	0.985386
HORVU0Hr1G010240	0	-
HORVU0Hr1G010250	-0.700252	0.0806788
HORVU0Hr1G010260	-0.218884	0.270309
HORVU0Hr1G010280	0.368381	0.678256
HORVU0Hr1G010310	0	-
HORVU0Hr1G010330	0	-
HORVU0Hr1G010340	-0.646893	0.265799
HORVU0Hr1G010350	1.24259	0.0291974
HORVU0Hr1G010360	0	-
HORVU0Hr1G010370	0	-
HORVU0Hr1G010390	0	-
HORVU0Hr1G010400	0	-
HORVU0Hr1G010410	0	-
HORVU0Hr1G010440	0	-
HORVU0Hr1G010460	-0.147952	0.918519
HORVU0Hr1G010470	0	-
HORVU0Hr1G010480	0	-
HORVU0Hr1G010490	0.261187	0.530103
HORVU0Hr1G010510	0.159155	0.637004
HORVU0Hr1G010530	0.12035	0.72929
HORVU0Hr1G010590	-0.323966	0.401538
HORVU0Hr1G010600	0	-
HORVU0Hr1G010630	-0.0347326	0.90003
HORVU0Hr1G010640	1.01861	0.1445
HORVU0Hr1G010660	0.482878	0.285255
HORVU0Hr1G010680	-0.0252496	0.97431
HORVU0Hr1G010690	0	-
HORVU0Hr1G010700	0	-
HORVU0Hr1G010710	0	-
HORVU0Hr1G010750	0.191483	0.359066
HORVU0Hr1G010760	-1.11707	0.265198
HORVU0Hr1G010770	0.0254758	0.959009
HORVU0Hr1G010790	0.28025	0.157239
HORVU0Hr1G010800	0.955898	0.00603093
HORVU0Hr1G010810	-0.131942	0.820892
HORVU0Hr1G010840	-0.307237	0.46106
HORVU0Hr1G010870	-0.0859819	0.66792
HORVU0Hr1G010880	-4.68323	0.00275437
HORVU0Hr1G010890	-0.334827	0.294265
HORVU0Hr1G010900	0.217664	0.559984
HORVU0Hr1G010910	-0.296119	0.622182
HORVU0Hr1G010920	0.183181	0.648225
HORVU0Hr1G010940	-0.375664	0.485406
HORVU0Hr1G010970	0.675885	0.592027
HORVU0Hr1G010990	0	-
HORVU0Hr1G011010	0	-
HORVU0Hr1G011030	0.536536	0.180833
HORVU0Hr1G011040	0.715071	0.56613
HORVU0Hr1G011050	0.527471	0.631665
HORVU0Hr1G011110	-0.754468	0.288996
HORVU0Hr1G011140	-0.664084	0.286355
HORVU0Hr1G011150	-0.696751	0.328598
HORVU0Hr1G011280	0	-
HORVU0Hr1G011310	0.142521	0.429651
HORVU0Hr1G011320	0	-
HORVU0Hr1G011330	-0.313283	0.294698
HORVU0Hr1G011420	-0.666466	0.190926
HORVU0Hr1G011430	-0.636169	0.197504
HORVU0Hr1G011440	0	-
HORVU0Hr1G011450	-3.18736	0.371518
HORVU0Hr1G011460	-0.0441418	0.89581
HORVU0Hr1G011480	-4.23135	0.00269695
HORVU0Hr1G011500	0	-
HORVU0Hr1G011510	-0.606568	0.280141
HORVU0Hr1G011520	0.748546	0.430105
HORVU0Hr1G011560	-0.178148	0.274517
HORVU0Hr1G011570	-0.225565	0.498573
HORVU0Hr1G011580	0	-
HORVU0Hr1G011600	-0.10626	0.849744
HORVU0Hr1G011610	0	-
HORVU0Hr1G011620	0	-
HORVU0Hr1G011630	0	-
HORVU0Hr1G011650	0.0329925	0.965201
HORVU0Hr1G011660	-1.12597	0.248303
HORVU0Hr1G011670	0	-
HORVU0Hr1G011700	0	-
HORVU0Hr1G011720	3.47112	0.00858925
HORVU0Hr1G011730	0	-
HORVU0Hr1G011750	0.0356123	0.936851
HORVU0Hr1G011760	0.0811874	0.879342
HORVU0Hr1G011770	0	-
HORVU0Hr1G011840	-0.448607	0.0730288
HORVU0Hr1G011860	-1.55717	0.000253117
HORVU0Hr1G011890	0	-
HORVU0Hr1G011940	0.366476	0.180371
HORVU0Hr1G012050	-0.282624	0.453127
HORVU0Hr1G012080	0	-
HORVU0Hr1G012090	-0.00672057	0.989995
HORVU0Hr1G012100	0	-
HORVU0Hr1G012130	0.431971	0.566908
HORVU0Hr1G012140	-0.705585	0.150225
HORVU0Hr1G012160	0	-
HORVU0Hr1G012190	0.834469	0.0368187
HORVU0Hr1G012220	0	-
HORVU0Hr1G012230	-1.15535	0.0464394
HORVU0Hr1G012260	-0.530559	0.0255874
HORVU0Hr1G012300	-0.575092	0.360708
HORVU0Hr1G012350	0	-
HORVU0Hr1G012370	-0.421258	0.14217
HORVU0Hr1G012390	-2.19583	0.246277
HORVU0Hr1G012410	0.56723	0.0163379
HORVU0Hr1G012460	1.5614	0.00090527
HORVU0Hr1G012490	-0.188134	0.701456
HORVU0Hr1G012510	0.251005	0.313803
HORVU0Hr1G012520	-0.187502	0.475882
HORVU0Hr1G012530	0	-
HORVU0Hr1G012560	0	-
HORVU0Hr1G012570	0	-
HORVU0Hr1G012620	-0.405166	0.0299506
HORVU0Hr1G012630	-0.592639	0.0611903
HORVU0Hr1G012670	0	-
HORVU0Hr1G012680	0	-
HORVU0Hr1G012710	-0.41192	0.4365
HORVU0Hr1G012740	0.856798	0.3368
HORVU0Hr1G012750	0.688721	0.463283
HORVU0Hr1G012780	0	-
HORVU0Hr1G012790	0	-
HORVU0Hr1G012820	-1.53597	0.0363054
HORVU0Hr1G012850	0	-
HORVU0Hr1G012860	0.225454	0.504614
HORVU0Hr1G012870	0.372051	0.587206
HORVU0Hr1G012890	0.302089	0.245954
HORVU0Hr1G012910	-2.52032	0.0235917
HORVU0Hr1G012920	-0.053312	0.949016
HORVU0Hr1G012930	0.693312	0.412385
HORVU0Hr1G012940	2.92422	0.00434794
HORVU0Hr1G012950	-0.68602	0.0450676
HORVU0Hr1G012970	-0.58853	0.297711
HORVU0Hr1G012990	0.490061	0.753883
HORVU0Hr1G013010	-1.6949	0.0294237
HORVU0Hr1G013020	-1.67299	0.0229836
HORVU0Hr1G013030	0	-
HORVU0Hr1G013040	0.0772057	0.805154
HORVU0Hr1G013060	-2.19529	0.00666747
HORVU0Hr1G013070	-2.3026	0.00766032
HORVU0Hr1G013080	0	-
HORVU0Hr1G013090	0.288334	0.447292
HORVU0Hr1G013110	0	-
HORVU0Hr1G013120	-1.6247	0.0150182
HORVU0Hr1G013140	0.293893	0.599942
HORVU0Hr1G013160	0.456727	0.210058
HORVU0Hr1G013170	0.246495	0.685126
HORVU0Hr1G013180	0.101231	0.836721
HORVU0Hr1G013190	-1.05848	0.0436637
HORVU0Hr1G013200	0.344451	0.306278
HORVU0Hr1G013220	-0.104778	0.700147
HORVU0Hr1G013240	-0.368411	0.321714
HORVU0Hr1G013250	0	-
HORVU0Hr1G013260	-1.63717	0.0321089
HORVU0Hr1G013280	0	-
HORVU0Hr1G013290	0.184862	0.527679
HORVU0Hr1G013310	0	-
HORVU0Hr1G013340	-0.857264	0.0104977
HORVU0Hr1G013350	-1.31614	0.0322476
HORVU0Hr1G013380	0.254147	0.595047
HORVU0Hr1G013390	-0.234663	0.424448
HORVU0Hr1G013430	-0.0484513	0.958288
HORVU0Hr1G013450	0	-
HORVU0Hr1G013460	0.421498	0.409624
HORVU0Hr1G013470	0	-
HORVU0Hr1G013490	0	-
HORVU0Hr1G013510	0.19685	0.448094
HORVU0Hr1G013610	0	-
HORVU0Hr1G013660	-0.544562	0.265952
HORVU0Hr1G013680	-0.0521343	0.930798
HORVU0Hr1G013700	0.0780503	0.877368
HORVU0Hr1G013720	2.17102	0.0434143
HORVU0Hr1G013740	1.52905	0.0454775
HORVU0Hr1G013750	0.332469	0.386486
HORVU0Hr1G013760	-1.83043	0.0269541
HORVU0Hr1G013770	0.137414	0.70324
HORVU0Hr1G013780	1.3461	0.0305809
HORVU0Hr1G013800	-0.126647	0.837827
HORVU0Hr1G013830	-1.08131	0.00238343
HORVU0Hr1G013850	0.639197	0.00473845
HORVU0Hr1G013870	-0.489118	0.160931
HORVU0Hr1G013890	0.500548	0.120332
HORVU0Hr1G013900	0.453621	0.17377
HORVU0Hr1G013910	0.833708	0.1539
HORVU0Hr1G013920	0	-
HORVU0Hr1G013930	0	-
HORVU0Hr1G013940	0	-
HORVU0Hr1G013950	0	-
HORVU0Hr1G013960	0	-
HORVU0Hr1G014000	0	-
HORVU0Hr1G014020	0	-
HORVU0Hr1G014030	-1.14381	0.0190097
HORVU0Hr1G014040	-3.28236	0.00416336
HORVU0Hr1G014050	-0.712754	0.00421639
HORVU0Hr1G014060	-0.138469	0.809155
HORVU0Hr1G014070	0.0757445	0.727576
HORVU0Hr1G014080	0	-
HORVU0Hr1G014100	-0.538059	0.619897
HORVU0Hr1G014110	-0.873567	0.051606
HORVU0Hr1G014120	0	-
HORVU0Hr1G014140	0	-
HORVU0Hr1G014150	0.65339	0.0201308
HORVU0Hr1G014170	-0.104476	0.81938
HORVU0Hr1G014190	0	-
HORVU0Hr1G014200	-0.465546	0.356901
HORVU0Hr1G014210	0.220921	0.215892
HORVU0Hr1G014220	0.0346016	0.86654
HORVU0Hr1G014230	0	-
HORVU0Hr1G014240	0.27361	0.136922
HORVU0Hr1G014250	-1.13489	0.158871
HORVU0Hr1G014260	0	-
HORVU0Hr1G014270	-0.702015	0.0308523
HORVU0Hr1G014280	0	-
HORVU0Hr1G014290	0	-
HORVU0Hr1G014300	0	-
HORVU0Hr1G014360	2.78852	0.0125658
HORVU0Hr1G014370	0	-
HORVU0Hr1G014390	0	-
HORVU0Hr1G014400	-1.14461	0.0594729
HORVU0Hr1G014450	0.189776	0.883845
HORVU0Hr1G014460	0.00889824	0.987378
HORVU0Hr1G014490	0	-
HORVU0Hr1G014500	0	-
HORVU0Hr1G014510	-1.12342	0.0518969
HORVU0Hr1G014520	0	-
HORVU0Hr1G014540	0	-
HORVU0Hr1G014570	0	-
HORVU0Hr1G014580	0	-
HORVU0Hr1G014620	0	-
HORVU0Hr1G014630	0.0076213	0.98972
HORVU0Hr1G014650	2.56977	0.0144812
HORVU0Hr1G014660	0	-
HORVU0Hr1G014720	-2.92239	0.163775
HORVU0Hr1G014750	-4.80459	0.0806788
HORVU0Hr1G014760	0	-
HORVU0Hr1G014770	0	-
HORVU0Hr1G014780	0.497298	0.209667
HORVU0Hr1G014790	-0.244996	0.437932
HORVU0Hr1G014810	-0.834525	0.200593
HORVU0Hr1G014840	2.01069	0.00279123
HORVU0Hr1G014880	1.61453	0.0235917
HORVU0Hr1G014900	-0.955125	0.0710727
HORVU0Hr1G014940	0.180449	0.569219
HORVU0Hr1G014950	0.0458333	0.953473
HORVU0Hr1G014960	-0.575688	0.0353196
HORVU0Hr1G014980	0	-
HORVU0Hr1G015030	-1.58425	0.000907807
HORVU0Hr1G015050	0.0233886	0.931357
HORVU0Hr1G015090	0.176059	0.763653
HORVU0Hr1G015130	0	-
HORVU0Hr1G015160	-0.935325	0.0212214
HORVU0Hr1G015180	1.1164	0.0247645
HORVU0Hr1G015190	0	-
HORVU0Hr1G015210	0	-
HORVU0Hr1G015220	-0.377612	0.359668
HORVU0Hr1G015230	-0.00725482	0.987378
HORVU0Hr1G015260	-0.519809	0.163768
HORVU0Hr1G015270	0	-
HORVU0Hr1G015280	0	-
HORVU0Hr1G015290	0	-
HORVU0Hr1G015300	0	-
HORVU0Hr1G015360	0	-
HORVU0Hr1G015370	-4.51852	0.0206896
HORVU0Hr1G015380	0.835916	0.00308185
HORVU0Hr1G015390	-0.311847	0.628187
HORVU0Hr1G015410	0.190765	0.860953
HORVU0Hr1G015420	2.60209	0.000831917
HORVU0Hr1G015440	0.641154	0.21361
HORVU0Hr1G015450	0.288835	0.0962532
HORVU0Hr1G015470	0	-
HORVU0Hr1G015500	0	-
HORVU0Hr1G015510	-1.13938	0.0290309
HORVU0Hr1G015520	-0.614073	0.0588236
HORVU0Hr1G015530	0.2416	0.611273
HORVU0Hr1G015560	0.196763	0.561834
HORVU0Hr1G015570	1.3238	0.077266
HORVU0Hr1G015590	0	-
HORVU0Hr1G015600	0	-
HORVU0Hr1G015630	0.00286249	0.995778
HORVU0Hr1G015650	-1.27934	0.0857528
HORVU0Hr1G015660	0	-
HORVU0Hr1G015680	0.0675115	0.962128
HORVU0Hr1G015700	0.55632	0.0195534
HORVU0Hr1G015710	0.392022	0.0680731
HORVU0Hr1G015750	0.089935	0.701447
HORVU0Hr1G015760	0	-
HORVU0Hr1G015770	-0.303295	0.0774962
HORVU0Hr1G015780	-2.9471	0.00406457
HORVU0Hr1G015810	-1.64136	0.000360386
HORVU0Hr1G015820	0.201764	0.634299
HORVU0Hr1G015830	0.461701	0.043004
HORVU0Hr1G015840	0.611192	0.224513
HORVU0Hr1G015850	0	-
HORVU0Hr1G015860	0.172804	0.850024
HORVU0Hr1G015890	-0.600551	0.108902
HORVU0Hr1G015910	0	-
HORVU0Hr1G015930	2.75145	0.00161635
HORVU0Hr1G015950	-0.637667	0.0983476
HORVU0Hr1G015960	0.0662928	0.832421
HORVU0Hr1G015970	0.56922	0.24034
HORVU0Hr1G015980	0	-
HORVU0Hr1G015990	0.480171	0.335494
HORVU0Hr1G016000	-0.405716	0.215208
HORVU0Hr1G016020	0	-
HORVU0Hr1G016040	-2.8016	0.0429042
HORVU0Hr1G016050	0.452958	0.0351853
HORVU0Hr1G016060	0	-
HORVU0Hr1G016130	0	-
HORVU0Hr1G016140	0	-
HORVU0Hr1G016150	0.961454	0.000282662
HORVU0Hr1G016170	-0.58591	0.406012
HORVU0Hr1G016180	0.976304	0.0046302
HORVU0Hr1G016190	-0.119184	0.602987
HORVU0Hr1G016220	0	-
HORVU0Hr1G016230	0	-
HORVU0Hr1G016250	0.494497	0.131327
HORVU0Hr1G016310	1.78245	0.120692
HORVU0Hr1G016330	-0.270374	0.769528
HORVU0Hr1G016340	0.0883966	0.761264
HORVU0Hr1G016350	0.278262	0.82342
HORVU0Hr1G016360	-0.203581	0.377702
HORVU0Hr1G016370	1.01059	0.545402
HORVU0Hr1G016380	0	-
HORVU0Hr1G016410	-3.11262	0.309608
HORVU0Hr1G016420	0	-
HORVU0Hr1G016430	-1.79404	0.00235759
HORVU0Hr1G016450	0.586564	0.0237061
HORVU0Hr1G016470	0	-
HORVU0Hr1G016480	-0.682248	0.500407
HORVU0Hr1G016510	0.0380481	0.950268
HORVU0Hr1G016530	0	-
HORVU0Hr1G016540	2.57004	0.22815
HORVU0Hr1G016560	0.582595	0.0177388
HORVU0Hr1G016570	0	-
HORVU0Hr1G016590	-1.37309	0.0158796
HORVU0Hr1G016610	-1.44133	0.0168957
HORVU0Hr1G016630	-0.239057	0.460323
HORVU0Hr1G016640	-0.172988	0.702152
HORVU0Hr1G016650	-0.0276292	0.94822
HORVU0Hr1G016660	-0.420863	0.112752
HORVU0Hr1G016680	-1.36702	0.417517
HORVU0Hr1G016690	0	-
HORVU0Hr1G016700	0.0964275	0.796582
HORVU0Hr1G016720	0.309357	0.248696
HORVU0Hr1G016780	0.959126	0.23992
HORVU0Hr1G016820	-0.204681	0.485245
HORVU0Hr1G016830	0	-
HORVU0Hr1G016840	-0.953655	0.00630182
HORVU0Hr1G016860	0.452691	0.278405
HORVU0Hr1G016880	-0.543049	0.0306541
HORVU0Hr1G016890	0.0847984	0.886718
HORVU0Hr1G016920	0.360221	0.0294019
HORVU0Hr1G016930	0.256996	0.202148
HORVU0Hr1G016940	-0.350727	0.34599
HORVU0Hr1G016950	0	-
HORVU0Hr1G016960	0.0142274	0.945838
HORVU0Hr1G016970	0	-
HORVU0Hr1G016980	0	-
HORVU0Hr1G017000	0.938186	0.329198
HORVU0Hr1G017010	0	-
HORVU0Hr1G017020	-0.368383	0.0316061
HORVU0Hr1G017050	0.877682	0.010143
HORVU0Hr1G017060	0	-
HORVU0Hr1G017070	0.527552	0.232136
HORVU0Hr1G017080	0.749115	0.0531074
HORVU0Hr1G017090	-0.34581	0.251463
HORVU0Hr1G017100	-0.635685	0.0120369
HORVU0Hr1G017110	1.68385	0.513858
HORVU0Hr1G017120	0.900697	0.000401928
HORVU0Hr1G017130	-0.736672	0.156897
HORVU0Hr1G017140	1.00146	0.00354191
HORVU0Hr1G017160	-1.09921	0.0428462
HORVU0Hr1G017170	0.468562	0.171367
HORVU0Hr1G017180	0.306098	0.647155
HORVU0Hr1G017200	-0.0298542	0.969103
HORVU0Hr1G017210	-0.195491	0.434275
HORVU0Hr1G017220	-6.59082	0.00367979
HORVU0Hr1G017230	0.839223	0.292769
HORVU0Hr1G017240	0	-
HORVU0Hr1G017250	-0.0969618	0.810886
HORVU0Hr1G017260	0.777663	0.00968951
HORVU0Hr1G017270	0.125756	0.815419
HORVU0Hr1G017280	0	-
HORVU0Hr1G017290	0	-
HORVU0Hr1G017320	-0.222318	0.589828
HORVU0Hr1G017330	0.154454	0.832841
HORVU0Hr1G017350	0	-
HORVU0Hr1G017360	0.122718	0.656294
HORVU0Hr1G017370	0.59831	0.0194974
HORVU0Hr1G017380	0.613838	0.207637
HORVU0Hr1G017400	-0.242195	0.669161
HORVU0Hr1G017440	0.403939	0.0505081
HORVU0Hr1G017450	0.633034	0.00119119
HORVU0Hr1G017480	-0.623905	0.152148
HORVU0Hr1G017490	-4.93473	0.00123686
HORVU0Hr1G017510	0.398113	0.14593
HORVU0Hr1G017530	1.08444	0.157049
HORVU0Hr1G017540	0.88192	0.00790545
HORVU0Hr1G017560	0.722799	0.17721
HORVU0Hr1G017570	0.725351	0.182848
HORVU0Hr1G017610	0	-
HORVU0Hr1G017620	-0.0918358	0.646109
HORVU0Hr1G017670	-0.0297995	0.976994
HORVU0Hr1G017680	0.340783	0.16406
HORVU0Hr1G017690	1.57022	0.0121114
HORVU0Hr1G017710	0	-
HORVU0Hr1G017720	0	-
HORVU0Hr1G017740	-0.332401	0.350368
HORVU0Hr1G017750	-0.343623	0.375725
HORVU0Hr1G017760	0	-
HORVU0Hr1G017790	-1.18575	0.00993192
HORVU0Hr1G017800	-0.170312	0.550688
HORVU0Hr1G017830	0	-
HORVU0Hr1G017840	0	-
HORVU0Hr1G017850	0	-
HORVU0Hr1G017940	-0.644169	0.156327
HORVU0Hr1G017950	0	-
HORVU0Hr1G017960	-1.01495	0.0294876
HORVU0Hr1G017970	0.0455228	0.903773
HORVU0Hr1G018000	0.0754496	0.823625
HORVU0Hr1G018020	0	-
HORVU0Hr1G018030	0	-
HORVU0Hr1G018040	0	-
HORVU0Hr1G018050	0.292629	0.594084
HORVU0Hr1G018060	-0.0998763	0.792117
HORVU0Hr1G018090	0	-
HORVU0Hr1G018100	-0.276389	0.497431
HORVU0Hr1G018120	-0.833401	0.00799495
HORVU0Hr1G018140	-0.243244	0.252299
HORVU0Hr1G018160	-0.482571	0.200474
HORVU0Hr1G018170	-0.927187	0.0972627
HORVU0Hr1G018180	-0.796011	0.457945
HORVU0Hr1G018190	-0.684524	0.646652
HORVU0Hr1G018200	-0.0233815	0.910735
HORVU0Hr1G018210	-0.0359865	0.922483
HORVU0Hr1G018240	1.92484	0.281036
HORVU0Hr1G018250	0	-
HORVU0Hr1G018260	0	-
HORVU0Hr1G018270	2.86847	0.015806
HORVU0Hr1G018280	0	-
HORVU0Hr1G018290	0.516753	0.761984
HORVU0Hr1G018300	-0.104529	0.67243
HORVU0Hr1G018320	-1.41336	0.0598152
HORVU0Hr1G018350	0.122955	0.861426
HORVU0Hr1G018360	0.00973189	0.989271
HORVU0Hr1G018370	-0.352815	0.388269
HORVU0Hr1G018380	-0.352815	0.388269
HORVU0Hr1G018390	0.11708	0.854034
HORVU0Hr1G018410	0	-
HORVU0Hr1G018430	0	-
HORVU0Hr1G018450	0	-
HORVU0Hr1G018470	0.0347878	0.935594
HORVU0Hr1G018480	-0.234817	0.643757
HORVU0Hr1G018510	0.411845	0.0357355
HORVU0Hr1G018520	0	-
HORVU0Hr1G018530	0	-
HORVU0Hr1G018560	0	-
HORVU0Hr1G018570	0	-
HORVU0Hr1G018590	-1.54058	0.700008
HORVU0Hr1G018670	0	-
HORVU0Hr1G018690	-1.75443	0.000271967
HORVU0Hr1G018710	-1.8292	0.0124411
HORVU0Hr1G018730	0	-
HORVU0Hr1G018770	0.0354274	0.96014
HORVU0Hr1G018780	0	-
HORVU0Hr1G018800	0	-
HORVU0Hr1G018810	0	-
HORVU0Hr1G018820	0	-
HORVU0Hr1G018830	0.273689	0.383136
HORVU0Hr1G018840	-1.03192	0.400898
HORVU0Hr1G018850	-4.41976	0.0318638
HORVU0Hr1G018890	-3.08161	0.00115957
HORVU0Hr1G018910	0	-
HORVU0Hr1G018940	0	-
HORVU0Hr1G018970	-0.342285	0.274855
HORVU0Hr1G018980	0.00377125	0.990767
HORVU0Hr1G019020	-3.23995	0.028092
HORVU0Hr1G019050	-1.30688	0.177816
HORVU0Hr1G019110	0	-
HORVU0Hr1G019120	0	-
HORVU0Hr1G019280	0	-
HORVU0Hr1G019300	1.18627	0.275683
HORVU0Hr1G019330	0	-
HORVU0Hr1G019350	-1.22941	0.0133618
HORVU0Hr1G019360	0	-
HORVU0Hr1G019370	-0.397027	0.112696
HORVU0Hr1G019390	-0.293301	0.281036
HORVU0Hr1G019400	0	-
HORVU0Hr1G019410	0	-
HORVU0Hr1G019420	-3.95396	0.000403331
HORVU0Hr1G019430	0	-
HORVU0Hr1G019450	-0.823779	0.120054
HORVU0Hr1G019500	0.984151	0.0698402
HORVU0Hr1G019530	0	-
HORVU0Hr1G019560	0	-
HORVU0Hr1G019570	0	-
HORVU0Hr1G019590	8.77627	0.0118537
HORVU0Hr1G019600	0.666242	0.0351539
HORVU0Hr1G019610	0.0874287	0.729881
HORVU0Hr1G019620	0.0785363	0.813884
HORVU0Hr1G019630	0	-
HORVU0Hr1G019640	0	-
HORVU0Hr1G019650	0	-
HORVU0Hr1G019660	0	-
HORVU0Hr1G019670	0	-
HORVU0Hr1G019680	0.72826	0.278265
HORVU0Hr1G019690	0.463973	0.603278
HORVU0Hr1G019700	0.795791	0.169558
HORVU0Hr1G019710	0.181285	0.323637
HORVU0Hr1G019750	-0.264476	0.599501
HORVU0Hr1G019760	-0.624497	0.278318
HORVU0Hr1G019770	0.863975	0.0220075
HORVU0Hr1G019780	0.394001	0.389253
HORVU0Hr1G019800	-0.507786	0.0841636
HORVU0Hr1G019830	0	-
HORVU0Hr1G019840	-5.98652	0.000485927
HORVU0Hr1G019850	0.928804	0.0321948
HORVU0Hr1G019870	-0.767254	0.216535
HORVU0Hr1G019920	1.41004	0.162581
HORVU0Hr1G019930	-0.379756	0.513858
HORVU0Hr1G019940	0	-
HORVU0Hr1G019950	-0.342438	0.529449
HORVU0Hr1G020040	0	-
HORVU0Hr1G020070	0.548155	0.0585244
HORVU0Hr1G020090	0	-
HORVU0Hr1G020110	0.355651	0.135067
HORVU0Hr1G020130	-0.614622	0.386468
HORVU0Hr1G020140	0.480363	0.0460421
HORVU0Hr1G020160	0.318284	0.316853
HORVU0Hr1G020180	0.267758	0.269393
HORVU0Hr1G020200	0.130886	0.736675
HORVU0Hr1G020210	0.038135	0.93574
HORVU0Hr1G020220	-0.380166	0.249886
HORVU0Hr1G020230	-2.72956	0.0144224
HORVU0Hr1G020240	-0.31417	0.4566
HORVU0Hr1G020250	0	-
HORVU0Hr1G020260	-0.644958	0.00454687
HORVU0Hr1G020270	-1.10723	0.298321
HORVU0Hr1G020280	0	-
HORVU0Hr1G020290	0	-
HORVU0Hr1G020300	-0.796154	0.201618
HORVU0Hr1G020310	0	-
HORVU0Hr1G020320	1.33154	0.101532
HORVU0Hr1G020330	-4.98508	0.101795
HORVU0Hr1G020340	0	-
HORVU0Hr1G020350	-1.03241	0.358493
HORVU0Hr1G020360	1.15447	0.0871782
HORVU0Hr1G020370	0	-
HORVU0Hr1G020380	0	-
HORVU0Hr1G020400	0	-
HORVU0Hr1G020420	-0.114522	0.851311
HORVU0Hr1G020450	-0.133917	0.696094
HORVU0Hr1G020460	0	-
HORVU0Hr1G020490	0.017372	0.965943
HORVU0Hr1G020500	-0.00141461	0.998218
HORVU0Hr1G020520	0	-
HORVU0Hr1G020540	0	-
HORVU0Hr1G020550	0	-
HORVU0Hr1G020560	0	-
HORVU0Hr1G020590	1.42327	0.0314168
HORVU0Hr1G020630	-0.466784	0.51465
HORVU0Hr1G020690	0	-
HORVU0Hr1G020700	0	-
HORVU0Hr1G020710	0	-
HORVU0Hr1G020720	0	-
HORVU0Hr1G020730	0.0347541	0.939009
HORVU0Hr1G020740	0	-
HORVU0Hr1G020750	-0.0875766	0.938325
HORVU0Hr1G020770	-0.144254	0.864793
HORVU0Hr1G020780	0.0301068	0.978431
HORVU0Hr1G020790	0.274851	0.124577
HORVU0Hr1G020800	0.022202	0.953499
HORVU0Hr1G020810	0.684224	0.335209
HORVU0Hr1G020840	-0.158266	0.670151
HORVU0Hr1G020850	-0.553307	0.152609
HORVU0Hr1G020860	-0.717368	0.0709551
HORVU0Hr1G020900	0	-
HORVU0Hr1G020910	0	-
HORVU0Hr1G020930	0	-
HORVU0Hr1G020940	-0.10386	0.917977
HORVU0Hr1G020950	0	-
HORVU0Hr1G020960	0.289198	0.641819
HORVU0Hr1G020980	-0.539158	0.0622961
HORVU0Hr1G021000	0.179088	0.575692
HORVU0Hr1G021040	0	-
HORVU0Hr1G021050	-0.154658	0.814389
HORVU0Hr1G021060	-0.270806	0.179806
HORVU0Hr1G021100	0.569584	0.0317991
HORVU0Hr1G021120	0	-
HORVU0Hr1G021140	0.217922	0.52945
HORVU0Hr1G021200	-0.223445	0.494363
HORVU0Hr1G021220	0	-
HORVU0Hr1G021230	0.255996	0.113861
HORVU0Hr1G021240	0	-
HORVU0Hr1G021280	1.33866	0.213883
HORVU0Hr1G021290	0	-
HORVU0Hr1G021390	0.926632	0.0189076
HORVU0Hr1G021400	1.00958	0.0135653
HORVU0Hr1G021410	0	-
HORVU0Hr1G021440	0	-
HORVU0Hr1G021450	-0.611922	0.262655
HORVU0Hr1G021460	-0.669169	0.29395
HORVU0Hr1G021480	1.68022	0.0700676
HORVU0Hr1G021500	0.569311	0.574851
HORVU0Hr1G021520	0	-
HORVU0Hr1G021540	0	1
HORVU0Hr1G021590	-0.464224	0.547893
HORVU0Hr1G021610	2.27817	0.0131331
HORVU0Hr1G021630	-1.12153	0.0280695
HORVU0Hr1G021640	1.35789	0.00419947
HORVU0Hr1G021670	0.112683	0.921811
HORVU0Hr1G021680	0	-
HORVU0Hr1G021690	-0.187355	0.838221
HORVU0Hr1G021720	-0.486289	0.42526
HORVU0Hr1G021730	0.571336	0.0590784
HORVU0Hr1G021740	0.0741633	0.785099
HORVU0Hr1G021760	-0.932658	0.0249091
HORVU0Hr1G021780	-0.0415919	0.942996
HORVU0Hr1G021800	-1.59621	0.0196992
HORVU0Hr1G021810	0.0126099	0.981654
HORVU0Hr1G021820	0	-
HORVU0Hr1G021830	0	-
HORVU0Hr1G021850	0.814988	0.00898855
HORVU0Hr1G021860	0.776643	0.00909758
HORVU0Hr1G021880	0.247802	0.163061
HORVU0Hr1G021890	0	-
HORVU0Hr1G021920	0	-
HORVU0Hr1G021930	-0.0104223	0.985773
HORVU0Hr1G021940	0.0126119	0.965048
HORVU0Hr1G021950	0.511957	0.0941677
HORVU0Hr1G021960	-0.128831	0.675174
HORVU0Hr1G021970	-0.0872684	0.783734
HORVU0Hr1G021980	0.700555	0.00861988
HORVU0Hr1G022000	-0.726864	0.0695844
HORVU0Hr1G022020	-3.80377	0.00127461
HORVU0Hr1G022030	-1.102	0.102073
HORVU0Hr1G022050	-0.0371637	0.872562
HORVU0Hr1G022060	-0.0355	0.960658
HORVU0Hr1G022070	1.23893	0.251015
HORVU0Hr1G022090	-3.40134	0.011391
HORVU0Hr1G022100	-2.62381	0.0892797
HORVU0Hr1G022110	-3.43529	0.00934331
HORVU0Hr1G022130	0	-
HORVU0Hr1G022140	0	-
HORVU0Hr1G022150	0	-
HORVU0Hr1G022160	-0.257271	0.277031
HORVU0Hr1G022170	0	-
HORVU0Hr1G022190	0	-
HORVU0Hr1G022200	0	-
HORVU0Hr1G022220	0	-
HORVU0Hr1G022230	0	-
HORVU0Hr1G022240	0.00968224	0.970109
HORVU0Hr1G022260	0.87694	0.252085
HORVU0Hr1G022270	0.00122295	0.997456
HORVU0Hr1G022280	-0.35645	0.274023
HORVU0Hr1G022290	0.696883	0.165581
HORVU0Hr1G022300	-0.351149	0.0237266
HORVU0Hr1G022310	0.115742	0.604396
HORVU0Hr1G022320	0	-
HORVU0Hr1G022330	-1.1749	0.323295
HORVU0Hr1G022340	-1.06592	0.0306847
HORVU0Hr1G022350	-1.14326	0.503136
HORVU0Hr1G022360	-3.60806	0.00822108
HORVU0Hr1G022370	-1.63349	0.0117651
HORVU0Hr1G022380	0.740779	0.117561
HORVU0Hr1G022390	0	-
HORVU0Hr1G022440	-0.17642	0.690118
HORVU0Hr1G022450	2.90821	0.00090238
HORVU0Hr1G022460	-0.278186	0.192733
HORVU0Hr1G022470	-0.298809	0.323805
HORVU0Hr1G022480	0.0580764	0.887224
HORVU0Hr1G022500	0.579439	0.0277627
HORVU0Hr1G022510	-0.187501	0.29091
HORVU0Hr1G022520	0	-
HORVU0Hr1G022540	0	-
HORVU0Hr1G022550	-0.383817	0.487615
HORVU0Hr1G022570	0	-
HORVU0Hr1G022580	-0.320098	0.143708
HORVU0Hr1G022590	-0.797652	0.0171919
HORVU0Hr1G022610	1.07771	0.614038
HORVU0Hr1G022650	-1.71802	0.386696
HORVU0Hr1G022670	-0.782608	0.0109728
HORVU0Hr1G022680	0	-
HORVU0Hr1G022690	-2.27359	0.05741
HORVU0Hr1G022730	0	-
HORVU0Hr1G022740	0	-
HORVU0Hr1G022750	0	-
HORVU0Hr1G022770	0	-
HORVU0Hr1G022780	1.08688	0.417562
HORVU0Hr1G022790	0	-
HORVU0Hr1G022810	-0.0917508	0.758462
HORVU0Hr1G022820	0.887784	0.227553
HORVU0Hr1G022830	-0.450012	0.0316678
HORVU0Hr1G022870	0	-
HORVU0Hr1G023050	0	-
HORVU0Hr1G023060	0	-
HORVU0Hr1G023080	0	-
HORVU0Hr1G023090	0	-
HORVU0Hr1G023120	0	-
HORVU0Hr1G023140	0.369205	0.247547
HORVU0Hr1G023150	0.24486	0.510894
HORVU0Hr1G023160	0	-
HORVU0Hr1G023170	0	-
HORVU0Hr1G023180	-0.748877	0.0192029
HORVU0Hr1G023190	0	-
HORVU0Hr1G023200	-0.121775	0.732502
HORVU0Hr1G023240	0	-
HORVU0Hr1G023250	-0.719365	0.030664
HORVU0Hr1G023260	0	-
HORVU0Hr1G023280	-0.105003	0.662987
HORVU0Hr1G023290	-0.0976904	0.751885
HORVU0Hr1G023300	0.39487	0.0364065
HORVU0Hr1G023320	0	-
HORVU0Hr1G023330	-0.922279	0.0379372
HORVU0Hr1G023360	4.65021	0.00379906
HORVU0Hr1G023420	0	-
HORVU0Hr1G023460	1.02674	0.000497437
HORVU0Hr1G023470	0.914921	0.00115466
HORVU0Hr1G023480	0.782517	0.235717
HORVU0Hr1G023490	0	-
HORVU0Hr1G023510	0.484899	0.0135877
HORVU0Hr1G023540	1.2646	0.010358
HORVU0Hr1G023570	4.76797	0.0445372
HORVU0Hr1G023590	-1.06666	0.569234
HORVU0Hr1G023600	0	-
HORVU0Hr1G023610	0	-
HORVU0Hr1G023640	-0.220715	0.372309
HORVU0Hr1G023660	0.0229859	0.961241
HORVU0Hr1G023690	0	-
HORVU0Hr1G023700	0	-
HORVU0Hr1G023710	0	-
HORVU0Hr1G023720	0	-
HORVU0Hr1G023740	0.807423	0.168248
HORVU0Hr1G023750	0.672941	0.0406082
HORVU0Hr1G023760	0.654674	0.0462718
HORVU0Hr1G023810	0	-
HORVU0Hr1G023830	0	-
HORVU0Hr1G023840	0	-
HORVU0Hr1G023870	-0.702978	0.293445
HORVU0Hr1G023890	-0.703538	0.289559
HORVU0Hr1G023910	-0.70621	0.29091
HORVU0Hr1G023920	-0.720599	0.278418
HORVU0Hr1G023930	-0.70582	0.232041
HORVU0Hr1G023940	-0.690239	0.23409
HORVU0Hr1G023950	0	-
HORVU0Hr1G023970	-0.729957	0.193669
HORVU0Hr1G023980	-0.702071	0.182839
HORVU0Hr1G023990	-0.814927	0.0990711
HORVU0Hr1G024020	-0.899812	0.199684
HORVU0Hr1G024030	-0.708182	0.284331
HORVU0Hr1G024050	0.205314	0.779912
HORVU0Hr1G024060	-0.495383	0.640565
HORVU0Hr1G024070	0.10247	0.897512
HORVU0Hr1G024100	0	-
HORVU0Hr1G024120	-0.74529	0.260224
HORVU0Hr1G024130	-0.698073	0.195703
HORVU0Hr1G024140	-0.761762	0.436121
HORVU0Hr1G024160	-0.732054	0.195183
HORVU0Hr1G024170	-0.685796	0.310669
HORVU0Hr1G024180	-0.711315	0.273029
HORVU0Hr1G024190	0	-
HORVU0Hr1G024200	-1.07624	0.056961
HORVU0Hr1G024220	-0.7907	0.115261
HORVU0Hr1G024230	-0.778289	0.287859
HORVU0Hr1G024270	-0.789788	0.115563
HORVU0Hr1G024280	-0.537291	0.28408
HORVU0Hr1G024300	-0.757522	0.253007
HORVU0Hr1G024310	0	-
HORVU0Hr1G024320	-0.395668	0.300426
HORVU0Hr1G024390	0	-
HORVU0Hr1G024400	0	-
HORVU0Hr1G024440	-0.227472	0.846976
HORVU0Hr1G024450	0.89415	0.159558
HORVU0Hr1G024460	0	-
HORVU0Hr1G024470	0.853612	0.38811
HORVU0Hr1G024480	-0.452245	0.343613
HORVU0Hr1G024490	0.181883	0.640355
HORVU0Hr1G024520	-0.776779	0.35195
HORVU0Hr1G024530	0.454294	0.334297
HORVU0Hr1G024540	0.4703	0.215779
HORVU0Hr1G024550	-0.197798	0.705248
HORVU0Hr1G024560	-0.60124	0.344378
HORVU0Hr1G024580	-0.589296	0.238549
HORVU0Hr1G024610	-0.0490373	0.949505
HORVU0Hr1G024620	-0.0850496	0.84436
HORVU0Hr1G024630	0.411242	0.522188
HORVU0Hr1G024650	-0.854649	0.267805
HORVU0Hr1G024670	0.0137479	0.986902
HORVU0Hr1G024680	-0.0850496	0.84436
HORVU0Hr1G024690	0	-
HORVU0Hr1G024700	-0.472239	0.335173
HORVU0Hr1G024720	0.168534	0.713965
HORVU0Hr1G024740	0.10713	0.60628
HORVU0Hr1G024750	-0.227472	0.846976
HORVU0Hr1G024760	0.942907	0.126651
HORVU0Hr1G024790	-0.622825	0.306592
HORVU0Hr1G024810	-0.380826	0.44114
HORVU0Hr1G024830	-0.0653392	0.915515
HORVU0Hr1G024840	0	-
HORVU0Hr1G024880	-0.730847	0.241065
HORVU0Hr1G024890	-0.626718	0.317057
HORVU0Hr1G024900	0.473026	0.271162
HORVU0Hr1G024920	-0.581009	0.129007
HORVU0Hr1G024930	-0.738841	0.207252
HORVU0Hr1G024950	0.907366	0.185681
HORVU0Hr1G024960	-0.0928996	0.795353
HORVU0Hr1G024970	-0.232463	0.80229
HORVU0Hr1G024980	0.454294	0.334297
HORVU0Hr1G024990	-1.23264	0.312169
HORVU0Hr1G025010	-0.452117	0.339147
HORVU0Hr1G025040	0.179002	0.789608
HORVU0Hr1G025100	-0.826343	0.514168
HORVU0Hr1G025110	0.444063	0.721524
HORVU0Hr1G025120	-0.655648	0.319905
HORVU0Hr1G025160	-0.655343	0.260369
HORVU0Hr1G025180	0.363789	0.76176
HORVU0Hr1G025190	0.307056	0.643957
HORVU0Hr1G025220	-0.0742726	0.910472
HORVU0Hr1G025240	0.033627	0.970133
HORVU0Hr1G025250	0	-
HORVU0Hr1G025290	0	-
HORVU0Hr1G025310	0	-
HORVU0Hr1G025330	0	-
HORVU0Hr1G025370	0	-
HORVU0Hr1G025390	0	-
HORVU0Hr1G025410	0.353546	0.335082
HORVU0Hr1G025420	0	-
HORVU0Hr1G025430	0	-
HORVU0Hr1G025440	0.0170989	0.985757
HORVU0Hr1G025460	0.0752572	0.940455
HORVU0Hr1G025520	0	-
HORVU0Hr1G025530	0	-
HORVU0Hr1G025540	0.0229993	0.934504
HORVU0Hr1G025620	0	-
HORVU0Hr1G025630	0.121115	0.87398
HORVU0Hr1G025650	0.881712	0.27986
HORVU0Hr1G025660	0	-
HORVU0Hr1G025670	0	-
HORVU0Hr1G025690	0	-
HORVU0Hr1G025700	-1.86066	0.178416
HORVU0Hr1G025750	0	-
HORVU0Hr1G025760	0	-
HORVU0Hr1G025770	0	-
HORVU0Hr1G025790	-0.406936	0.445661
HORVU0Hr1G025800	-4.26249	0.00851488
HORVU0Hr1G025810	-4.04968	0.0114901
HORVU0Hr1G025820	-0.516947	0.141027
HORVU0Hr1G025850	-0.75286	0.166048
HORVU0Hr1G025860	0.0493538	0.90278
HORVU0Hr1G025870	-0.71024	0.0103492
HORVU0Hr1G025890	-0.925961	0.0117638
HORVU0Hr1G025900	0.570011	0.0327451
HORVU0Hr1G025910	0.497298	0.209667
HORVU0Hr1G025920	-0.291907	0.422482
HORVU0Hr1G025970	0	-
HORVU0Hr1G026010	-0.196541	0.56613
HORVU0Hr1G026030	-0.474838	0.193037
HORVU0Hr1G026070	-0.125943	0.820001
HORVU0Hr1G026090	-0.586256	0.351888
HORVU0Hr1G026120	0.029139	0.977862
HORVU0Hr1G026130	1.08991	0.246667
HORVU0Hr1G026140	-0.103217	0.875543
HORVU0Hr1G026150	0.551493	0.153807
HORVU0Hr1G026160	0.0103243	0.99129
HORVU0Hr1G026170	-0.0850496	0.84436
HORVU0Hr1G026190	0.00622606	0.993051
HORVU0Hr1G026200	0.240387	0.685126
HORVU0Hr1G026230	-0.680667	0.10444
HORVU0Hr1G026250	0.330036	0.636265
HORVU0Hr1G026260	0.525159	0.414448
HORVU0Hr1G026270	0.270368	0.660679
HORVU0Hr1G026280	0.0109179	0.987378
HORVU0Hr1G026290	-0.0850496	0.84436
HORVU0Hr1G026330	0.504056	0.40209
HORVU0Hr1G026340	0	-
HORVU0Hr1G026370	0	-
HORVU0Hr1G026390	0	-
HORVU0Hr1G026410	0	-
HORVU0Hr1G026430	0.49372	0.361532
HORVU0Hr1G026480	0.438403	0.464832
HORVU0Hr1G026500	0.0566219	0.89448
HORVU0Hr1G026520	0	-
HORVU0Hr1G026530	0	-
HORVU0Hr1G026540	0	-
HORVU0Hr1G026550	0	-
HORVU0Hr1G026560	0	-
HORVU0Hr1G026590	-0.0104644	0.99478
HORVU0Hr1G026620	0	-
HORVU0Hr1G026630	0	-
HORVU0Hr1G026640	-0.626118	0.204402
HORVU0Hr1G026650	-1.40717	0.0138016
HORVU0Hr1G026660	0	-
HORVU0Hr1G026690	0	-
HORVU0Hr1G026700	0.728969	0.0283392
HORVU0Hr1G026710	0.126685	0.872019
HORVU0Hr1G026730	0	-
HORVU0Hr1G026770	-0.680667	0.10444
HORVU0Hr1G026780	0.0271216	0.980109
HORVU0Hr1G026790	-0.351891	0.628748
HORVU0Hr1G026800	0.521139	0.423372
HORVU0Hr1G026810	0.288283	0.632233
HORVU0Hr1G026820	0.0769041	0.892387
HORVU0Hr1G026830	-0.0850496	0.84436
HORVU0Hr1G026860	0.147284	0.875537
HORVU0Hr1G026870	-0.311373	0.669161
HORVU0Hr1G026890	-0.747539	0.137162
HORVU0Hr1G026900	-0.680666	0.105168
HORVU0Hr1G026910	-0.933445	0.168248
HORVU0Hr1G026930	0	-
HORVU0Hr1G026940	0.295467	0.682553
HORVU0Hr1G026950	-0.680666	0.105168
HORVU0Hr1G026990	0.374516	0.761509
HORVU0Hr1G027000	-2.24959	0.032284
HORVU0Hr1G027010	0.3672	0.032303
HORVU0Hr1G027030	0	-
HORVU0Hr1G027050	0.550646	0.209166
HORVU0Hr1G027060	-0.249609	0.12738
HORVU0Hr1G027070	-1.99834	0.000222777
HORVU0Hr1G027080	-1.34571	0.000895875
HORVU0Hr1G027100	0	-
HORVU0Hr1G027130	-0.563829	0.0427246
HORVU0Hr1G027160	-0.180737	0.535353
HORVU0Hr1G027170	-0.118842	0.618521
HORVU0Hr1G027200	-0.0372516	0.978864
HORVU0Hr1G027230	-0.180737	0.535353
HORVU0Hr1G027280	0	-
HORVU0Hr1G027290	0.858759	0.00313793
HORVU0Hr1G027310	1.04623	0.0222398
HORVU0Hr1G027380	0	-
HORVU0Hr1G027400	0	-
HORVU0Hr1G027410	-2.36485	0.00953852
HORVU0Hr1G027430	-0.542553	0.293547
HORVU0Hr1G027440	0.73242	0.124703
HORVU0Hr1G027450	0	-
HORVU0Hr1G027460	0.259595	0.721318
HORVU0Hr1G027480	0	-
HORVU0Hr1G027490	0.497298	0.209667
HORVU0Hr1G027510	-0.181947	0.772503
HORVU0Hr1G027520	-0.0120502	0.986937
HORVU0Hr1G027540	-0.136382	0.766603
HORVU0Hr1G027550	0.505884	0.206676
HORVU0Hr1G027560	0.00962793	0.993391
HORVU0Hr1G027570	0	-
HORVU0Hr1G027600	-0.602563	0.242701
HORVU0Hr1G027620	-0.58981	0.328248
HORVU0Hr1G027640	0.929015	0.114734
HORVU0Hr1G027660	0.224449	0.468996
HORVU0Hr1G027670	-0.431751	0.115329
HORVU0Hr1G027680	0.109187	0.517941
HORVU0Hr1G027900	0.432688	0.269233
HORVU0Hr1G027910	0.292582	0.544472
HORVU0Hr1G027920	0	-
HORVU0Hr1G027940	0	-
HORVU0Hr1G027960	-0.761986	0.0433824
HORVU0Hr1G027970	0.931882	0.000630024
HORVU0Hr1G027980	-0.563997	0.521347
HORVU0Hr1G027990	0	-
HORVU0Hr1G028010	-0.188354	0.389141
HORVU0Hr1G028040	0	-
HORVU0Hr1G028080	0.498864	0.0343061
HORVU0Hr1G028130	-1.70403	0.00116777
HORVU0Hr1G028140	-1.67312	0.0072026
HORVU0Hr1G028170	-0.285426	0.212966
HORVU0Hr1G028210	0	-
HORVU0Hr1G028230	-0.620207	0.264904
HORVU0Hr1G028270	0.177897	0.61773
HORVU0Hr1G028300	0	-
HORVU0Hr1G028320	0.497298	0.209667
HORVU0Hr1G028350	1.37584	0.00284532
HORVU0Hr1G028360	0.552841	0.398952
HORVU0Hr1G028370	0.288013	0.655289
HORVU0Hr1G028380	-0.0120569	0.986953
HORVU0Hr1G028390	-0.0850496	0.84436
HORVU0Hr1G028400	-0.0168055	0.98442
HORVU0Hr1G028410	-0.194119	0.744774
HORVU0Hr1G028420	0.029139	0.977862
HORVU0Hr1G028450	-0.589296	0.238549
HORVU0Hr1G028470	-0.128973	0.832248
HORVU0Hr1G028480	0.391629	0.36676
HORVU0Hr1G028530	-0.347928	0.458643
HORVU0Hr1G028540	-0.117086	0.875543
HORVU0Hr1G028550	0	-
HORVU0Hr1G028560	0.505139	0.661084
HORVU0Hr1G028570	0.853612	0.38811
HORVU0Hr1G028580	0.89415	0.159558
HORVU0Hr1G028590	-0.227472	0.846976
HORVU0Hr1G028600	0.250693	0.80279
HORVU0Hr1G028640	0.374516	0.761509
HORVU0Hr1G028650	-0.680667	0.10444
HORVU0Hr1G028660	-0.18803	0.84804
HORVU0Hr1G028670	0.487135	0.140311
HORVU0Hr1G028680	1.80157	0.00676846
HORVU0Hr1G028710	0.62638	0.115291
HORVU0Hr1G028890	0	-
HORVU0Hr1G028900	0.281665	0.819843
HORVU0Hr1G028920	-0.310536	0.745324
HORVU0Hr1G028930	0.180538	0.491968
HORVU0Hr1G028950	0.657081	0.279422
HORVU0Hr1G028970	0.0445751	0.947481
HORVU0Hr1G028990	-0.597419	0.00803003
HORVU0Hr1G029050	-1.52789	0.0176039
HORVU0Hr1G029090	-0.0936831	0.861071
HORVU0Hr1G029100	0	-
HORVU0Hr1G029110	0	-
HORVU0Hr1G029140	0.400244	0.262389
HORVU0Hr1G029180	0.708363	0.114766
HORVU0Hr1G029190	-0.509387	0.354152
HORVU0Hr1G029200	-1.40066	0.00720037
HORVU0Hr1G029210	0	-
HORVU0Hr1G029220	0	-
HORVU0Hr1G029230	0	-
HORVU0Hr1G029310	-0.696423	0.18706
HORVU0Hr1G029320	-0.658719	0.210767
HORVU0Hr1G029340	-0.741308	0.148889
HORVU0Hr1G029350	-0.730697	0.186582
HORVU0Hr1G029370	0.347398	0.370134
HORVU0Hr1G029460	0.401444	0.527971
HORVU0Hr1G029480	-0.316779	0.637065
HORVU0Hr1G029490	0	-
HORVU0Hr1G029500	0.130133	0.840599
HORVU0Hr1G029520	0.0448555	0.923446
HORVU0Hr1G029570	0	-
HORVU0Hr1G029590	0.626703	0.12396
HORVU0Hr1G029600	-0.313964	0.398226
HORVU0Hr1G029660	-0.18803	0.84804
HORVU0Hr1G029670	0.131243	0.551663
HORVU0Hr1G029680	-0.227472	0.846976
HORVU0Hr1G029690	0.89415	0.159558
HORVU0Hr1G029720	0.504754	0.0605143
HORVU0Hr1G029730	0.290916	0.41958
HORVU0Hr1G029750	-0.494229	0.330843
HORVU0Hr1G029760	0.364149	0.448345
HORVU0Hr1G029770	-0.204529	0.697779
HORVU0Hr1G029780	-0.246158	0.712174
HORVU0Hr1G029790	-0.690694	0.22206
HORVU0Hr1G029810	-0.570122	0.239341
HORVU0Hr1G029850	-0.553624	0.632033
HORVU0Hr1G029860	0.289137	0.670574
HORVU0Hr1G029870	0.029139	0.977862
HORVU0Hr1G029880	1.08991	0.246667
HORVU0Hr1G029890	-0.103217	0.875543
HORVU0Hr1G029900	0.551493	0.153807
HORVU0Hr1G029910	-0.224821	0.482061
HORVU0Hr1G029920	0.0137479	0.986902
HORVU0Hr1G029930	-0.0850496	0.84436
HORVU0Hr1G029960	0.095484	0.848142
HORVU0Hr1G029980	0	-
HORVU0Hr1G030000	0	-
HORVU0Hr1G030010	0.397979	0.131104
HORVU0Hr1G030030	0	-
HORVU0Hr1G030060	0	-
HORVU0Hr1G030080	-0.15733	0.834612
HORVU0Hr1G030090	-0.463981	0.590267
HORVU0Hr1G030100	0	-
HORVU0Hr1G030120	0.481981	0.0642943
HORVU0Hr1G030130	0	-
HORVU0Hr1G030140	0	-
HORVU0Hr1G030160	1.98728	0.0124296
HORVU0Hr1G030170	0	-
HORVU0Hr1G030190	0.562594	0.154251
HORVU0Hr1G030200	-0.0599816	0.860625
HORVU0Hr1G030280	0.698655	0.0230017
HORVU0Hr1G030300	0.395991	0.0722275
HORVU0Hr1G030310	0	-
HORVU0Hr1G030360	0	-
HORVU0Hr1G030370	0	-
HORVU0Hr1G030380	0	-
HORVU0Hr1G030390	0	-
HORVU0Hr1G030440	0.469049	0.0153957
HORVU0Hr1G030450	-1.00737	0.00285986
HORVU0Hr1G030460	0.64914	0.010485
HORVU0Hr1G030500	1.68277	0.386468
HORVU0Hr1G030510	0	-
HORVU0Hr1G030520	-0.0933912	0.956775
HORVU0Hr1G030570	0	-
HORVU0Hr1G030600	-0.16768	0.867173
HORVU0Hr1G030630	-0.754738	0.120573
HORVU0Hr1G030640	-0.739978	0.137492
HORVU0Hr1G030650	0	-
HORVU0Hr1G030660	0	-
HORVU0Hr1G030670	0	-
HORVU0Hr1G030680	0	-
HORVU0Hr1G030690	0.0109179	0.987378
HORVU0Hr1G030700	-0.136382	0.766603
HORVU0Hr1G030710	0.00962793	0.993391
HORVU0Hr1G030740	-0.578016	0.238549
HORVU0Hr1G030760	-0.748684	0.144155
HORVU0Hr1G030770	0.391501	0.35819
HORVU0Hr1G030780	-0.03426	0.95834
HORVU0Hr1G030810	0.22693	0.469951
HORVU0Hr1G030820	-0.173594	0.583781
HORVU0Hr1G030830	1.11944	0.195076
HORVU0Hr1G030860	0	-
HORVU0Hr1G030870	0	-
HORVU0Hr1G030920	-0.23573	0.26312
HORVU0Hr1G030950	0	-
HORVU0Hr1G030970	0	-
HORVU0Hr1G030980	-0.655526	0.0144908
HORVU0Hr1G031050	-0.655014	0.417237
HORVU0Hr1G031060	0.0746207	0.940461
HORVU0Hr1G031070	0.199492	0.69909
HORVU0Hr1G031080	0	-
HORVU0Hr1G031100	0	-
HORVU0Hr1G031130	0	-
HORVU0Hr1G031140	-0.504524	0.615809
HORVU0Hr1G031170	0.96337	0.00151006
HORVU0Hr1G031210	0	-
HORVU0Hr1G031250	0.374516	0.761509
HORVU0Hr1G031270	-0.690595	0.222065
HORVU0Hr1G031290	0.625231	0.402746
HORVU0Hr1G031300	-0.504991	0.194243
HORVU0Hr1G031330	-0.62683	0.316645
HORVU0Hr1G031350	-1.0094	0.199656
HORVU0Hr1G031360	-0.127676	0.837773
HORVU0Hr1G031380	-0.553701	0.605716
HORVU0Hr1G031420	-0.0557787	0.863256
HORVU0Hr1G031430	0.454294	0.334297
HORVU0Hr1G031440	-0.103217	0.875543
HORVU0Hr1G031450	0.396062	0.322927
HORVU0Hr1G031470	-0.158003	0.785105
HORVU0Hr1G031480	-0.277337	0.54747
HORVU0Hr1G031500	-0.816712	0.00832235
HORVU0Hr1G031520	-0.204088	0.426842
HORVU0Hr1G031580	-1.35986	0.480267
HORVU0Hr1G031620	0	-
HORVU0Hr1G031630	0	-
HORVU0Hr1G031640	0	-
HORVU0Hr1G031650	0	-
HORVU0Hr1G031660	0	-
HORVU0Hr1G031690	0.523701	0.0362229
HORVU0Hr1G031700	1.80219	0.00559414
HORVU0Hr1G031710	0.213551	0.791104
HORVU0Hr1G031720	0.0809277	0.874508
HORVU0Hr1G031730	0.626323	0.114652
HORVU0Hr1G031750	0	-
HORVU0Hr1G031760	-0.219888	0.220641
HORVU0Hr1G031790	0	-
HORVU0Hr1G031810	-0.131274	0.688359
HORVU0Hr1G031830	0	-
HORVU0Hr1G031850	-0.569823	0.0362171
HORVU0Hr1G031890	-0.214711	0.599942
HORVU0Hr1G031910	0	-
HORVU0Hr1G031920	0.436412	0.407323
HORVU0Hr1G031930	5.10281	0.00574714
HORVU0Hr1G031950	-0.495383	0.640565
HORVU0Hr1G031960	-0.348573	0.0791102
HORVU0Hr1G031970	0.389582	0.422982
HORVU0Hr1G031980	0.257098	0.131183
HORVU0Hr1G031990	0	-
HORVU0Hr1G032000	0.286585	0.815785
HORVU0Hr1G032020	-0.31053	0.749448
HORVU0Hr1G032040	0	-
HORVU0Hr1G032060	0	-
HORVU0Hr1G032070	0.634281	0.296693
HORVU0Hr1G032100	-4.80042	0.0338058
HORVU0Hr1G032110	-0.198895	0.66293
HORVU0Hr1G032120	-0.242068	0.437933
HORVU0Hr1G032130	0	-
HORVU0Hr1G032140	-2.24959	0.032284
HORVU0Hr1G032200	0	-
HORVU0Hr1G032220	0	-
HORVU0Hr1G032230	1.10973	0.105646
HORVU0Hr1G032250	0.147676	0.764315
HORVU0Hr1G032260	0.1797	0.736197
HORVU0Hr1G032280	-0.250648	0.657321
HORVU0Hr1G032300	0	-
HORVU0Hr1G032310	0	-
HORVU0Hr1G032320	0.383412	0.249524
HORVU0Hr1G032330	0.383412	0.249524
HORVU0Hr1G032340	0	-
HORVU0Hr1G032350	0.0771788	0.936604
HORVU0Hr1G032360	-0.605396	0.0293137
HORVU0Hr1G032370	-0.833837	0.379258
HORVU0Hr1G032390	-0.132227	0.579402
HORVU0Hr1G032400	-0.737011	0.0380833
HORVU0Hr1G032410	0	-
HORVU0Hr1G032440	0	-
HORVU0Hr1G032490	-1.21792	0.44996
HORVU0Hr1G032510	0	-
HORVU0Hr1G032540	0.666221	0.267643
HORVU0Hr1G032560	0	-
HORVU0Hr1G032570	-0.504991	0.194243
HORVU0Hr1G032600	0.932225	0.131178
HORVU0Hr1G032620	0.625231	0.402746
HORVU0Hr1G032640	-0.627481	0.316129
HORVU0Hr1G032670	0	-
HORVU0Hr1G032690	0	-
HORVU0Hr1G032700	0	-
HORVU0Hr1G032710	0.304648	0.665436
HORVU0Hr1G032720	0	-
HORVU0Hr1G032730	-0.117086	0.875543
HORVU0Hr1G032740	-0.452245	0.343613
HORVU0Hr1G032800	0.340947	0.513088
HORVU0Hr1G032810	0.480839	0.203135
HORVU0Hr1G032820	0.391629	0.36676
HORVU0Hr1G032830	0.115722	0.835171
HORVU0Hr1G032840	0	-
HORVU0Hr1G032850	0	-
HORVU0Hr1G032860	0	-
HORVU0Hr1G032870	0	-
HORVU0Hr1G032890	0	-
HORVU0Hr1G032900	0	-
HORVU0Hr1G032910	-0.680666	0.105168
HORVU0Hr1G032920	0.520693	0.417731
HORVU0Hr1G032930	0.247548	0.675629
HORVU0Hr1G032940	0.0164003	0.981841
HORVU0Hr1G032950	-0.0850496	0.84436
HORVU0Hr1G032960	-0.194119	0.744774
HORVU0Hr1G032970	0.0173744	0.987378
HORVU0Hr1G032980	-0.758305	0.588334
HORVU0Hr1G033000	-0.129073	0.812768
HORVU0Hr1G033020	-0.403993	0.479983
HORVU0Hr1G033030	-0.573879	0.400973
HORVU0Hr1G033050	-0.0566385	0.932747
HORVU0Hr1G033060	-0.158003	0.785105
HORVU0Hr1G033070	0.352512	0.454979
HORVU0Hr1G033090	-0.962892	0.405361
HORVU0Hr1G033120	0	-
HORVU0Hr1G033130	0.374516	0.761509
HORVU0Hr1G033160	0	-
HORVU0Hr1G033170	0	-
HORVU0Hr1G033190	0	-
HORVU0Hr1G033200	0.5035	0.115873
HORVU0Hr1G033220	0	-
HORVU0Hr1G033250	0	-
HORVU0Hr1G033260	-0.421088	0.44469
HORVU0Hr1G033280	-0.589296	0.238549
HORVU0Hr1G033290	0.0950577	0.926779
HORVU0Hr1G033300	-0.962892	0.405361
HORVU0Hr1G033320	0	-
HORVU0Hr1G033330	-1.13514	0.00619712
HORVU0Hr1G033360	-0.748238	0.286076
HORVU0Hr1G033370	-0.723218	0.305875
HORVU0Hr1G033410	-0.680667	0.10444
HORVU0Hr1G033420	0.320977	0.63529
HORVU0Hr1G033440	0.259375	0.674486
HORVU0Hr1G033450	-0.00203174	0.998251
HORVU0Hr1G033460	-0.0850496	0.84436
HORVU0Hr1G033470	-0.194119	0.744774
HORVU0Hr1G033480	1.08991	0.246667
HORVU0Hr1G033490	0.029139	0.977862
HORVU0Hr1G033520	-0.589296	0.238549
HORVU0Hr1G033540	0.21472	0.80418
HORVU0Hr1G033550	0.014833	0.987378
HORVU0Hr1G033560	-0.379857	0.671498
HORVU0Hr1G033570	-0.0932733	0.794483
HORVU0Hr1G033600	0.374516	0.761509
HORVU0Hr1G033630	0.197	0.611709
HORVU0Hr1G033640	0	-
HORVU0Hr1G033660	0.550738	0.034131
HORVU0Hr1G033670	0	-
HORVU0Hr1G033690	0.295817	0.676385
HORVU0Hr1G033700	0.502103	0.440619
HORVU0Hr1G033710	0.240387	0.685126
HORVU0Hr1G033720	0.00563242	0.993134
HORVU0Hr1G033730	-0.0773551	0.853442
HORVU0Hr1G033740	-0.194119	0.744774
HORVU0Hr1G033750	0.029139	0.977862
HORVU0Hr1G033770	-0.589296	0.238549
HORVU0Hr1G033790	-0.268915	0.705858
HORVU0Hr1G033800	-0.158003	0.785105
HORVU0Hr1G033810	0.391629	0.36676
HORVU0Hr1G033820	0.389549	0.413729
HORVU0Hr1G033850	-0.18803	0.84804
HORVU0Hr1G033860	-0.227472	0.846976
HORVU0Hr1G033870	0.893459	0.364961
HORVU0Hr1G033880	0.505139	0.663033
HORVU0Hr1G033890	0	-
HORVU0Hr1G033900	-0.452245	0.343613
HORVU0Hr1G033940	0	-
HORVU0Hr1G033970	0.374516	0.761509
HORVU0Hr1G033990	0.014833	0.987378
HORVU0Hr1G034000	-0.379857	0.671498
HORVU0Hr1G034010	-0.0932733	0.794483
HORVU0Hr1G034040	-0.709076	0.0897919
HORVU0Hr1G034050	0.014833	0.987378
HORVU0Hr1G034080	0	-
HORVU0Hr1G034090	0	-
HORVU0Hr1G034110	0	-
HORVU0Hr1G034120	0	-
HORVU0Hr1G034130	0	-
HORVU0Hr1G034150	-0.233689	0.725886
HORVU0Hr1G034160	0.205654	0.766545
HORVU0Hr1G034190	0.853612	0.38811
HORVU0Hr1G034210	-0.627466	0.316129
HORVU0Hr1G034240	0.100837	0.897485
HORVU0Hr1G034250	-0.172823	0.581729
HORVU0Hr1G034260	0.894435	0.162422
HORVU0Hr1G034280	-0.553701	0.605716
HORVU0Hr1G034290	-0.545856	0.300617
HORVU0Hr1G034300	-0.860696	0.251029
HORVU0Hr1G034320	-0.594658	0.379934
HORVU0Hr1G034330	0.029139	0.977862
HORVU0Hr1G034340	-0.0222304	0.970133
HORVU0Hr1G034350	-0.0152241	0.97135
HORVU0Hr1G034370	-0.2863	0.657087
HORVU0Hr1G034380	-0.0550054	0.90441
HORVU0Hr1G034420	-0.348491	0.705611
HORVU0Hr1G034430	0.346388	0.721478
HORVU0Hr1G034460	-0.0850496	0.84436
HORVU0Hr1G034470	-0.880192	0.173098
HORVU0Hr1G034480	0.181625	0.769058
HORVU0Hr1G034500	1.01	0.168996
HORVU0Hr1G034510	-0.987174	0.396275
HORVU0Hr1G034520	0.176844	0.798454
HORVU0Hr1G034540	0.207359	0.694662
HORVU0Hr1G034550	0.198029	0.630526
HORVU0Hr1G034600	-0.682442	0.110667
HORVU0Hr1G034610	-0.765859	0.165781
HORVU0Hr1G034630	-0.104317	0.881371
HORVU0Hr1G034640	-0.25967	0.689478
HORVU0Hr1G034650	0.496268	0.521347
HORVU0Hr1G034660	-0.407164	0.631529
HORVU0Hr1G034700	0.0544682	0.943968
HORVU0Hr1G034720	-0.249065	0.562458
HORVU0Hr1G034730	-0.057099	0.860261
HORVU0Hr1G034740	-0.669662	0.289254
HORVU0Hr1G034750	-0.860696	0.251029
HORVU0Hr1G034770	-0.0557787	0.863256
HORVU0Hr1G034780	-0.603539	0.320007
HORVU0Hr1G034790	-0.504991	0.194243
HORVU0Hr1G034800	-0.505956	0.326361
HORVU0Hr1G034830	0.0534008	0.88467
HORVU0Hr1G034850	-0.905169	0.139631
HORVU0Hr1G034860	0.385849	0.749397
HORVU0Hr1G034900	0	-
HORVU0Hr1G034910	0	-
HORVU0Hr1G034930	-0.847761	0.179585
HORVU0Hr1G034940	-0.811038	0.194014
HORVU0Hr1G034950	-0.959109	0.152213
HORVU0Hr1G034960	-0.735932	0.091064
HORVU0Hr1G034970	-0.938475	0.166489
HORVU0Hr1G034980	-0.765255	0.13842
HORVU0Hr1G035010	0	-
HORVU0Hr1G035030	-0.310536	0.745324
HORVU0Hr1G035060	0	-
HORVU0Hr1G035110	0	-
HORVU0Hr1G035140	0	-
HORVU0Hr1G035160	-0.680667	0.10444
HORVU0Hr1G035170	-0.0850496	0.84436
HORVU0Hr1G035180	-0.194119	0.744774
HORVU0Hr1G035190	0.029139	0.977862
HORVU0Hr1G035200	-0.553701	0.605716
HORVU0Hr1G035230	-0.949605	0.40129
HORVU0Hr1G035250	-0.0932733	0.794483
HORVU0Hr1G035260	-0.379857	0.671498
HORVU0Hr1G035270	0.014833	0.987378
HORVU0Hr1G035280	0.552841	0.398952
HORVU0Hr1G035290	0.406751	0.521181
HORVU0Hr1G035300	0.374516	0.761509
HORVU0Hr1G035310	-0.0979278	0.833512
HORVU0Hr1G035320	-0.79559	0.116612
HORVU0Hr1G035340	-0.0933912	0.956775
HORVU0Hr1G035420	0	-
HORVU0Hr1G035430	0	-
HORVU0Hr1G035440	0	-
HORVU0Hr1G035460	-0.662966	0.312821
HORVU0Hr1G035470	-0.647968	0.295021
HORVU0Hr1G035530	-0.64596	0.327282
HORVU0Hr1G035540	0	-
HORVU0Hr1G035560	0.925059	0.000617861
HORVU0Hr1G035570	0	-
[truncated: 37,842 more rows]
