# Supplementary material for: WAX INDUCER 1 Regulates β-Diketone Biosynthesis by Mediating Expression of the Cer-cqu Gene Cluster in Barley
Source: Int J Mol Sci. 2023 Apr 5;24(7):6762. doi: 10.3390/ijms24076762 (PMC10095013; doi:10.3390/ijms24076762)
Supplement: Supplementary file 1 [file ijms-24-06762-s001.zip › Table_S4_clustered_genes.xlsx]

## Sheet: description
Supporting Information
Article title: WAX INDUCER 1 regulates β-diketone biosynthesis by medi-ating expression of the cer-cqu gene cluster in barley
Authors: Sophia V. Gerasimova, Ekaterina V. Kolosovskaya, Alexander V. Vikhorev, Anna M. Korotkova, Christian W. Hertig, Mikhail A. Genaev, Dmitry V. Domrachev, Sergey V. Morozov, Elena I. Chernyak, Nikolay A. Shmakov, Gennady V. Vasilyev, Alex V. Kochetov, Jochen Kumlehn, Elena K. Khlestkina
Article acceptance date:
Table S4: Information about Cer-cqu cluster and related genes located at chromosome 2H
lb_win1-lb_wt	comparison between leaf blade of win1 knockout genotype and leaf blade of wild type plants
ls_win1-ls_wt	comparison between leaf sheath of win1 knockout genotype and leaf sheath of wild type plants
lb_win1-ls_win1	comparison between leaf blade of win1 knockout genotype and leaf sheath of win1 genotype plants
lb_wt-ls_wt	comparison between leaf blade of wild type and leaf sheath of wild type plants
logFC	logarythmic value of expression values change
FDR	false discovery rate
RPKM	reads per kilobase of transcript, per million mapped reads

## Sheet: Table S4
Gene id							Mean expression (RPKM)				Expression change
IBSC id	MLOC id	Gene name	Alternative gene name	UniProt id	Pfam id	Pfam description	lb_wt	lb_win1	ls_wt	ls_win1	logFC(lb_win1-lb_wt)	FDR(lb_win1-lb_wt)	logFC(ls_win1-ls_wt)	FDR(ls_win1-ls_wt)	logFC(lb_win1-ls_win1)	FDR(lb_win1-ls_win1)	logFC(lb_wt-ls_wt)	FDR(lb_wt-ls_wt)
HORVU2Hr1G002570	-	-	-	A0A287GWV1	PF00067	Cytochrome P450	0.267366	0.603055	3.08732	0.436694	1.16929	0.263906	-2.81787	0.0375294	0.481239	0.711388	-3.50592	0.00490914
HORVU2Hr1G002580	MLOC_71974	-	-	M0YR60	PF00067	Cytochrome P450	0	0.186904	12.7368	1.29104	7.26554	0.0243933	-3.30283	0.0437548	-2.68122	0.0609529	-13.2496	0.000429227
HORVU2Hr1G002610	-	-	-	Nontranslating CDS	-	-	0	0.10729	3.43963	0.252875	5.31952	0.102231	-3.71464	0.0656241	-1.10392	0.580111	-10.1381	0.00247254
HORVU2Hr1G002620	MLOC_13397	Cer-q	DMH (Hydrolase)	A0A171CWU2	PF07859	Alpha/beta hydrolase fold-3	0	0.333229	19.1356	1.74059	8.07085	0.0359106	-3.45837	0.0833502	-2.29687	0.172	-13.8261	0.00112458
HORVU2Hr1G002630	-	-	-	A0A287GWQ3	PF03006	AdipoR/Haemolysin-III-related	0	0.0664473	6.31562	0.305668	5.50599	0.0433158	-4.35987	0.0090483	-2.04796	0.128984	-11.9138	0.000271967
HORVU2Hr1G002640	MLOC_59804	Cer-c	DMP (PKS-like)	M0XGE3	PF02797, PF00195	Chalcone/stilbene synthase, C-terminal, Chalcone/stilbene synthase, N-terminal	0.00460168	1.9035	63.2706	11.9263	8.42739	0.0131038	-2.4073	0.294474	-2.6295	0.171773	-13.4642	0.00108621
HORVU2Hr1G002650	MLOC_12151	Cer-u	DMC (P450) CYP709J4	A0A287GWR9	PF00067	Cytochrome P450	0	0.572636	16.9028	2.59722	9.66262	0.0314478	-2.70086	0.2503	-2.14056	0.281821	-14.504	0.00283642
HORVU2Hr1G003280	-	-	-	A0A287GX45	PF02797, PF00195	Chalcone/stilbene synthase, C-terminal, Chalcone/stilbene synthase, N-terminal	0	0.0282543	1.32225	0.195257	5.47996	0.0391973	-2.75333	0.0557001	-2.61959	0.0578572	-10.8529	0.000471143
HORVU2Hr1G003300	-	-	-	M0V6W4	PF07859	Alpha/beta hydrolase fold-3	0.00412213	0.494695	10.124	1.62908	6.45656	0.025203	-2.63353	0.184961	-1.66576	0.338568	-10.7558	0.00126508
HORVU2Hr1G004690	-	-	-	A0A287GY65	PF02797, PF00195	Chalcone/stilbene synthase, C-terminal, Chalcone/stilbene synthase, N-terminal	0.105517	0.263199	5.88805	0.353275	1.39924	0.329129	-4.05129	0.0247252	-0.373111	0.831926	-5.82364	0.00177904
HORVU2Hr1G004710	-	-	-	M0Y922	PF00891, PF08100	O-methyltransferase domain, Plant methyltransferase dimerisation	0.00632973	1.22092	31.4344	3.09366	7.30027	0.0129387	-3.34392	0.096306	-1.30789	0.447519	-11.9521	0.000719028
HORVU0Hr1G001800	-	-	-	-	PF00067	Cytochrome P450	0.00349247	1.35102	95.3285	8.70917	8.18455	0.0110731	-3.45237	0.100805	-2.66162	0.123225	-14.2985	0.000475919
