# Supplementary material for: WAX INDUCER 1 Regulates β-Diketone Biosynthesis by Mediating Expression of the Cer-cqu Gene Cluster in Barley
Source: Int J Mol Sci. 2023 Apr 5;24(7):6762. doi: 10.3390/ijms24076762 (PMC10095013; doi:10.3390/ijms24076762)
Supplement: Supplementary file 1 [file ijms-24-06762-s001.zip › Table_S5_wax_synthesis_genes.xlsx]

## Sheet: description
Supporting Information
Article title: WAX INDUCER 1 regulates β-diketone biosynthesis by medi-ating expression of the cer-cqu gene cluster in barley
Authors: Sophia V. Gerasimova, Ekaterina V. Kolosovskaya, Alexander V. Vikhorev, Anna M. Korotkova, Christian W. Hertig, Mikhail A. Genaev, Dmitry V. Domrachev, Sergey V. Morozov, Elena I. Chernyak, Nikolay A. Shmakov, Gennady V. Vasilyev, Alex V. Kochetov, Jochen Kumlehn, Elena K. Khlestkina
Article acceptance date:
Table S5: Barley homologues of Arabidopsis thaliana genes involved in wax biosynthesis
lb_wt	wild-type leaf blade
lb_win1	win1 KO leaf blade
ls_wt	wild-type leaf sheath
ls_win1	win1 KO leaf sheath
lb_win1-lb_wt	comparison between leaf blade of win1 genotype and leaf blade of wild type plants
ls_win1-ls_wt	comparison between leaf sheath of win1 genotype and leaf sheath of wild type plants
lb_win1-ls_win1	comparison between leaf blade of win1 genotype and leaf sheath of win1 genotype plants
lb_wt-ls_wt	comparison between leaf blade of wild type and leaf sheath of wild type plants
logFC	logarythmic value of expression values change
FDR	False discovery rate

## Sheet: Table S5
Pathway	Enzyme name	Gene abbreviation	Arabidopsis gene id	Barley gene id	Mean expression (RPKM)				Expression change (log-transformed fold change)
					lb_wt	lb_win1	ls_wt	ls_win1	logFC(lb_win1-lb_wt)	FDR(lb_win1-lb_wt)	logFC(ls_win1-ls_wt)	FDR(ls_win1-ls_wt)	logFC(lb_win1-ls_win1)	FDR(lb_win1-ls_win1)	logFC(lb_wt-ls_wt)	FDR(lb_wt-ls_wt)
Fatty acid elongation	β-Ketoacyl-coenzyme A synthase	KCS1	AT2G46720, AT1G01120, AT2G26640, AT3G10280, AT4G34510, AT1G04220, AT1G19440, AT1G25450, AT1G68530, AT1G71160, AT2G15090, AT2G16280, AT2G26250, AT4G34250, AT4G34520, AT5G43760, AT3G52160, AT2G28630, AT5G04530, AT1G07720, AT5G49070	HORVU4Hr1G063420	4.35145	9.46586	3.72987	4.15969	1.11991	0.0304581	0.15733	0.838599	1.18558	0.0363376	0.222995	0.676375
		KCS4		HORVU1Hr1G089710	5.97285	4.1695	5.95504	4.03086	-0.51837	0.0122146	-0.562963	0.0197023	0.0490677	0.849383	0.00447525	0.986937
		KCS4		HORVU2Hr1G112840	0	6.44446	0.766442	2.25846	12.1917	0.0314926	1.55525	0.668309	1.51617	0.639646	-9.12025	0.10197
		KCS5		HORVU1Hr1G086760	0	0	0	0	0	0	0	0	0	0	0	0
		KCS5		HORVU3Hr1G054500	0	0	0	0	0	0	0	0	0	0	0	0
		KCS5		HORVU3Hr1G069880	0.00223374	0.675049	0.032751	0.175287	7.65685	0.00515196	2.34872	0.256359	1.94957	0.250063	-3.35855	0.226099
		KCS5		HORVU6Hr1G073300	0.0656915	0.574398	3.93283	0.531062	3.11827	0.00220416	-2.89146	0.00440041	0.11258	0.908693	-5.89716	8.35097e-05
		KCS5		HORVU7Hr1G006910	2.18052	4.35043	1.90359	0.736984	0.994726	0.034281	-1.37111	0.0218713	2.56257	0.00057877	0.196727	0.689527
		KCS5		HORVU7Hr1G023280	0	0	0	0	0	0	0	0	0	0	0	0
		KCS5		HORVU7Hr1G042050	0	0	0	0	9.96686	0.0353495	1.5201	0.635074	0.386347	0.904495	-8.06041	0.0854947
		KCS6		HORVU0Hr1G020250	0	0	0	0	0	0	0	0	0	0	0	0
		KCS6		HORVU0Hr1G038430	0.108285	0.086361	0	0.00562527	-0.323606	0.83256	2.55392	0.489355	3.49957	0.0922672	6.37709	0.0155104
		KCS6		HORVU3Hr1G054510	0	0	0	0	0	0	0	0	0	0	0	0
		KCS6		HORVU3Hr1G097570	0.00218953	1.23883	0.344013	0.887402	8.43286	0.0217527	1.35641	0.633843	0.49342	0.860082	-6.58303	0.0632646
		KCS6		HORVU4Hr1G067340	5.26135	6.25337	7.28349	3.41255	0.247532	0.579316	-1.09362	0.0396455	0.8728	0.0654425	-0.468355	0.260974
		KCS6		HORVU5Hr1G087530	0	0.0127984	4.84586	0.408869	3.71097	0.0966383	-3.57058	0.00334245	-4.65163	0.00155478	-11.9332	8.35097e-05
		KCS6		HORVU5Hr1G122360	0.00446093	0.0047218	0.327634	0.0892026	-0.317869	0.883471	-1.85304	0.0668278	-4.09876	0.0084155	-5.63393	0.000366782
		KCS6		HORVU6Hr1G004830	0.246143	1.8357	0.37326	1.05684	2.90691	0.159617	1.50311	0.561341	0.805196	0.746842	-0.598601	0.795739
		KCS6		HORVU6Hr1G082270	0	1.0202	0.210261	0.371833	9.69267	0.0454644	0.821063	0.831023	1.46483	0.63134	-7.40678	0.130451
		KCS6		HORVU6Hr1G094160	0	0	0	0	0	0	0	0	0	0	0	0
		KCS6		HORVU7Hr1G022720	0	0	0	0	0	0	0	0	0	0	0	0
		KCS6		HORVU7Hr1G022780	0	0	0	0	0	0	0	0	0	0	0	0
		KCS6		HORVU7Hr1G023540	0	0	0	0	0	0	0	0	0	0	0	0
		KCS6		HORVU7Hr1G030880	0	0.495582	0.0664179	0.279607	8.69057	0.0413432	2.05991	0.497637	0.847907	0.765173	-5.78275	0.203135
		KCS6		HORVU7Hr1G042040	0	0	0	0	0	0	0	0	0	0	0	0
		KCS6		HORVU7Hr1G042060	0	0	0	0	0	0	0	0	0	0	0	0
		KCS6		HORVU7Hr1G042070	0	0	0	0	0	0	0	0	0	0	0	0
		KCS10		HORVU4Hr1G076940	5.99569	17.3213	7.89759	8.39187	1.53047	0.0114695	0.0876932	0.925802	1.04554	0.0858659	-0.397235	0.47247
		KCS11		HORVU1Hr1G090730	0.174841	0.102242	0.494334	0.755279	-0.775942	0.373271	0.610372	0.552854	-2.89118	0.00482297	-1.50487	0.0642907
		KCS11		HORVU6Hr1G036950	0.263434	0.192349	0.116234	0.173743	-0.453316	0.109497	0.579208	0.0886745	0.147503	0.675296	1.18003	0.0011363
		KCS11		HORVU7Hr1G023530	0.0523723	0.0044178	0.0174173	0.00717992	-3.39283	0.0201455	-1.25266	0.45864	-0.5786	0.76233	1.56157	0.177881
		KCS11		HORVU7Hr1G084610	1.20111	0.881879	4.06276	2.9703	-0.447041	0.468307	-0.451641	0.563416	-1.75575	0.0109626	-1.76035	0.00775731
		KCS12		HORVU7Hr1G022610	0	1.68838	0.366729	0.844632	10.2667	0.0329528	1.19715	0.722843	1.00891	0.736576	-8.0606	0.0891881
		KCS12		HORVU7Hr1G022690	0	0.452397	0.135913	0.261689	8.4122	0.0425576	0.934557	0.774077	0.81533	0.76943	-6.66232	0.113603
		KCS17		HORVU5Hr1G056870	0	0.0963149	0	0.191091	7.48558	0.0809466	8.41861	0.0867894	-0.933028	0.72295	0	1
	β-Ketoacyl-coenzyme A reductase	KCR	AT1G67730, AT1G24470	HORVU1Hr1G086330	0	0	0	0	0	0	0	0	0	0	0	0
				HORVU2Hr1G083740	0.000766904	0.840855	0.316441	0.617922	9.50696	0.0197111	0.964928	0.762944	0.451481	0.88004	-8.09055	0.0386393
				HORVU2Hr1G122170	0	0	0	0	0	0	0	0	0	0	0	0
				HORVU4Hr1G061020	0	0.0529828	0.0120636	0.308381	5.45708	0.0956387	4.64393	0.064826	-2.38553	0.198528	-3.19869	0.390984
				HORVU5Hr1G045880	0.188263	0.356394	0.232352	0.445657	0.898276	0.273823	0.935815	0.341526	-0.311539	0.75944	-0.274	0.769874
				HORVU5Hr1G083070	0	0	0	0	0	0	0	0	0	0	0	0
				HORVU6Hr1G054000	7.65392	6.9496	7.7753	7.52545	-0.138848	0.467825	-0.0470712	0.876042	-0.114644	0.60505	-0.0228674	0.919924
				HORVU7Hr1G001550	0	0	0	0	0	0	0	0	0	0	0	0
				HORVU7Hr1G023260	0	0	0	0	0	0	0	0	0	0	0	0
				HORVU7Hr1G024370	0	0.399588	4.23801	3.14555	8.34022	0.0424333	-0.427247	0.882522	-2.92423	0.155042	-11.6917	0.00641179
				HORVU7Hr1G044900	0.0037014	0.778862	0.124478	0.498735	7.45675	0.0268817	2.00311	0.481074	0.650322	0.822385	-4.80332	0.126316
				HORVU7Hr1G045000	0	0	0	0	0	0	0	0	0	0	0	0
				HORVU7Hr1G063290	0	0	0	0	0	0	0	0	0	0	0	0
	β-Hydroxyacyl-coenzyme A dehydratase	HCD	AT5G10480	HORVU3Hr1G013750	0.00339892	4.12497	1.26227	2.27783	10.0548	0.0188801	0.849374	0.809027	0.86015	0.777946	-8.34526	0.0385957
				HORVU3Hr1G013730	1.56801	0.896322	1.17798	0.809512	-0.80253	0.064834	-0.542046	0.313082	0.151343	0.789418	0.411827	0.332626
				HORVU3Hr1G116200	1.71752	2.29259	2.14932	3.13434	0.417082	0.300676	0.544616	0.262542	-0.450961	0.307629	-0.323427	0.423796
	Trans-2,3-Enoyl-Coenzyme A reductase	ECR	AT3G55360	HORVU3Hr1G013790	13.5914	21.264	17.329	15.6617	0.645812	0.027956	-0.145925	0.718503	0.44128	0.153226	-0.350457	0.205574
Alkane-forming pathway	fatty aldehyde decarbonylase	CER1	AT1G02205, AT1G02190, AT2G37700	HORVU0Hr1G029100	0	0	0	0	0	0	0	0	0	0	0	0
				HORVU1Hr1G039820	0.00603814	0.558271	0.0979347	0.139426	6.53947	0.00394371	0.505903	0.813285	2.00517	0.204685	-4.0284	0.0345126
				HORVU1Hr1G039830	0.00350157	0.108544	2.9686	3.49591	4.88405	0.0256761	0.235672	0.907956	-4.92769	0.00383151	-9.57607	0.000483002
				HORVU2Hr1G088860	0.00301424	1.42199	0.197523	0.585412	8.7281	0.0227472	1.55982	0.617218	1.28516	0.64977	-5.88312	0.0996884
				HORVU2Hr1G088880	0.00164052	1.50722	0.495057	0.733595	9.60507	0.0179393	0.565793	0.873759	1.04335	0.71147	-7.99592	0.0370802
				HORVU2Hr1G127280	0	0	0	0	0	0	0	0	0	0	0	0
				HORVU4Hr1G001510	0	0	0	0	0	0	0	0	0	0	0	0
				HORVU6Hr1G058000	0.0508731	0.0191567	0.0204767	0.0418862	-1.3468	0.293855	1.02501	0.532468	-1.07195	0.463605	1.29985	0.296349
				HORVU7Hr1G023150	0.0770268	0.149863	0.128897	0.133067	0.962615	0.378841	0.0439297	0.982532	0.18131	0.904219	-0.737375	0.503453
	Very-long-chain aldehyde decarbonylase	CER3	AT5G57800	HORVU5Hr1G063820	3.50303	7.3129	4.26555	1.8066	1.06062	0.0333478	-1.24047	0.0408678	2.01754	0.00212484	-0.283555	0.570221
				HORVU6Hr1G029810	4.31363	2.96375	3.91639	4.52894	-0.541349	0.0145848	0.209812	0.415251	-0.611722	0.0102769	0.139439	0.506814
				HORVU7Hr1G112710	2.82213	2.15077	1.48999	1.26437	-0.390821	0.498886	-0.237726	0.778352	0.768649	0.217149	0.921745	0.0972498
	Midchain alkane hydroxylase 1	MAH1	AT1G57750	HORVU1Hr1G027410	0	0	0	0	0	0	0	0	0	0	0	0
				HORVU1Hr1G035380	0.0583733	0.307914	0.00232651	0.00221536	2.36764	0.0278002	0.202542	0.962407	6.4235	0.0017369	4.25841	0.0162069
				HORVU1Hr1G094420	0	0	0	0	0	0	0	0	0	0	0	0
				HORVU2Hr1G000430	0.0105528	0.28381	0.00584779	0.00578431	4.63362	0.00253005	-0.0520086	0.986649	5.61246	0.00212484	0.926828	0.542095
				HORVU2Hr1G000480	0	0	0	0	0	0	0	0	0	0	0	0
				HORVU2Hr1G000660	0	0	0	0	0	0	0	0	0	0	0	0
				HORVU2Hr1G001150	0.960121	0.522609	0.196268	0.315837	-0.857228	0.51473	0.687422	0.712242	0.740709	0.640115	2.28536	0.084908
				HORVU2Hr1G001160	0.180212	0.302607	0.0694008	0.126745	0.728773	0.55872	0.864062	0.60485	1.23143	0.374257	1.36672	0.265316
				HORVU2Hr1G002580	0	0.186904	12.7368	1.29104	7.26554	0.0243933	-3.30283	0.0437548	-2.68122	0.0609529	-13.2496	0.000429227
				HORVU2Hr1G119060	0.0624696	0.357316	0.00309365	0.00294585	2.48742	0.021947	0.202176	0.960962	6.22682	0.00180473	3.94157	0.0224449
				HORVU2Hr1G119100	0.0579481	0.330027	0.00278779	0.00265461	2.47691	0.0221487	0.202233	0.96101	6.26128	0.00174871	3.9866	0.0210428
				HORVU2Hr1G127260	0	0	0	0	0	0	0	0	0	0	0	0
				HORVU3Hr1G011830	0.0189568	0.216041	5.14946	1.13808	3.53953	0.00655528	-2.17791	0.0316953	-2.33297	0.0137399	-8.05041	8.35097e-05
				HORVU3Hr1G020800	0	0	0	0	0	0	0	0	0	0	0	0
				HORVU3Hr1G020870	0	0	0	0	0	0	0	0	0	0	0	0
				HORVU3Hr1G105120	0.0329859	0.148507	0.146852	0.118998	2.20933	0.113712	-0.303898	0.883204	0.361335	0.831491	-2.15189	0.118983
				HORVU3Hr1G110180	0.0243272	0.204329	5.02407	1.13449	3.13492	0.0263015	-2.14717	0.0750676	-2.39747	0.0329424	-7.67955	0.000198046
				HORVU4Hr1G001500	0	0	0	0	0	0	0	0	0	0	0	0
				HORVU4Hr1G064570	0	0	0	0	0	0	0	0	0	0	0	0
				HORVU4Hr1G076700	0	0	0	0	0	0	0	0	0	0	0	0
				HORVU4Hr1G083930	8.19682	21.225	45.9201	37.057	1.37257	0.0246845	-0.309366	0.704909	-0.803505	0.194262	-2.48544	0.00109366
				HORVU4Hr1G083940	3.45802	4.69769	10.4651	7.26039	0.442268	0.202001	-0.527441	0.212623	-0.627244	0.0952477	-1.59695	0.000630625
				HORVU4Hr1G084120	0	0	0	0	0	0	0	0	0	0	0	0
				HORVU5Hr1G088980	0.0824665	0.0575735	0.122653	0.0468413	-0.483621	0.661982	-1.36561	0.275958	0.346958	0.807916	-0.535035	0.588613
				HORVU5Hr1G089000	0	0	0	0	0	0	0	0	0	0	0	0
				HORVU5Hr1G089040	0.0824665	0.0575735	0.122653	0.0468413	-0.483621	0.661982	-1.36561	0.275958	0.346958	0.807916	-0.535035	0.588613
				HORVU5Hr1G089110	0	0	0	0	0	0	0	0	0	0	0	0
				HORVU5Hr1G089120	0	0	0	0	0	0	0	0	0	0	0	0
				HORVU5Hr1G089160	0	0	0	0	0	0	0	0	0	0	0	0
				HORVU6Hr1G002770	0.034762	0.780078	1.10949	1.72654	4.50069	0.0529113	0.635955	0.814108	-1.12491	0.596191	-4.98964	0.0343323
Alcohol-forming pathway	alcohol-forming fatty acyl-CoA reductase	CER4	AT4G33790, AT3G44540, AT3G44550, AT3G44560, AT5G22500, AT5G22420	HORVU0Hr1G029110	0	0	0	0	0	0	0	0	0	0	0	0
				HORVU1Hr1G000190	0	0	0	0	0	0	0	0	0	0	0	0
				HORVU1Hr1G094400	0	0	0	0	0	0	0	0	0	0	0	0
				HORVU2Hr1G112790	0	0	0	0	0	0	0	0	0	0	0	0
				HORVU2Hr1G127270	0	0	0	0	0	0	0	0	0	0	0	0
				HORVU3Hr1G002040	0.00497876	0.0319282	0.0320799	0.145703	2.64835	0.0851524	2.18275	0.125457	-2.14788	0.0996458	-2.61348	0.0844294
				HORVU3Hr1G002090	0	1.4842	0.230133	0.418471	11.6646	0.0326253	0.860259	0.826969	1.83037	0.562685	-8.97392	0.0930277
				HORVU3Hr1G002120	0	0	0	0	0	0	0	0	0	0	0	0
				HORVU3Hr1G002170	0	0	0	0	0	0	0	0	0	0	0	0
				HORVU3Hr1G097450	0	0	0	0	0	0	0	0	0	0	0	0
				HORVU4Hr1G001450	0.215064	1.95528	0.121042	0.328857	3.17713	0.0102914	1.41635	0.287042	2.57879	0.0408638	0.818009	0.463555
				HORVU4Hr1G001550	0.0201578	0.115315	0.0113746	0.0159286	2.52626	0.105467	0.358724	0.914835	2.80431	0.122532	0.636778	0.764682
				HORVU4Hr1G001560	0	0	0	0	0	0	0	0	0	0	0	0
				HORVU4Hr1G087110	0.0228518	0.229861	0.193526	0.733141	3.28624	0.00311743	1.90888	0.0396455	-1.66806	0.0465403	-3.04542	0.00371866
				HORVU5Hr1G089230	0.00240473	1.19098	0.0544325	1.5149	8.87453	0.00588311	4.8261	0.0400556	-0.344115	0.879656	-4.39254	0.150792
				HORVU5Hr1G124820	0	0	0	0	0	0	0	0	0	0	0	0
				HORVU6Hr1G001280	0	0	0	0	0	0	0	0	0	0	0	0
				HORVU7Hr1G020270	0	0	0	0	0	0	0	0	0	0	0	0
				HORVU7Hr1G023320	0	0	0	0	0	0	0	0	0	0	0	0
				HORVU7Hr1G092230	2.20452	1.33164	0.381668	0.271127	-0.723991	0.123678	-0.497593	0.428021	2.29945	0.00112411	2.52585	0.000353768
	wax ester synthase	WSD1	AT5G37300	HORVU3Hr1G062940	0.402608	0.0300188	0.123448	0.0900772	-3.69472	0.00284709	-0.459048	0.726865	-1.5347	0.143809	1.70097	0.0588131
				HORVU3Hr1G002050	0.00117939	0.0254358	0.0540581	0.0778801	3.86375	0.0645009	0.522766	0.77687	-1.45632	0.316342	-4.79731	0.0185807
				HORVU3Hr1G062900	0.390078	0.0301673	0.11767	0.092685	-3.64319	0.00304886	-0.349183	0.799796	-1.56816	0.136365	1.72584	0.0553685
				HORVU5Hr1G082210	0.0602797	0.113401	0.101543	0.119895	0.911829	0.0747446	0.239935	0.745522	-0.0806164	0.90991	-0.752511	0.133831
				HORVU3Hr1G074840	3.61851	3.25156	1.6434	1.75161	-0.154563	0.547175	0.0929851	0.804195	0.891221	0.00407832	1.13877	0.000567821
				HORVU3Hr1G014800	0	0	0	0	0	0	0	0	0	0	0	0
				HORVU5Hr1G082160	0.0136131	0.0749617	0.0367484	0.0410894	2.45385	0.00702158	0.162064	0.899308	0.86713	0.31381	-1.42466	0.0687892
				HORVU3Hr1G002060	0.0822249	0.140252	0.0194841	0.105685	0.77602	0.57632	2.4479	0.164912	0.429676	0.803792	2.10156	0.158113
				HORVU5Hr1G087330	0	0	0	0	0	0	0	0	0	0	0	0
				HORVU5Hr1G082040	0.00980072	0.375818	0.00446889	0.69322	5.11561	0.00636383	7.07453	0.00343767	-0.877169	0.552407	1.08176	0.641751
				HORVU5Hr1G082220	0.352665	1.90808	1.93754	1.8775	2.42119	0.00730733	-0.0442707	0.9742	0.0284249	0.979273	-2.43704	0.00627174
				HORVU1Hr1G084980	0.191989	0.31913	0.150704	0.153977	0.734286	0.0595301	0.0352003	0.96234	1.04517	0.0203114	0.346089	0.373732
				HORVU6Hr1G013350	0	0	0	0	0	0	0	0	0	0	0	0
				HORVU7Hr1G024590	0.00271145	0.304502	2.44802	3.05774	6.616	0.0213377	0.321582	0.908671	-3.30015	0.0830648	-9.59457	0.00303446
				HORVU3Hr1G074910	1.72283	2.69582	0.778541	0.435768	0.644613	0.269622	-0.829644	0.272982	2.62044	0.00189859	1.14618	0.055903
				HORVU3Hr1G001150	0	0.782898	0.320939	0.469537	10.5834	0.0315769	0.546722	0.885359	0.745266	0.809941	-9.29146	0.0536053
Transcriptional factors		AP2/ERF	Win1	HORVU6Hr1G038120	0.100521214	0.101556642	0.065534566	0.225357606	0.00893274	0.988567	1.77474	0.0038229	-1.14692	0.0222642	0.618882	0.168458
			ERF	HORVU6Hr1G085850	0	0	0	0	0	0	0	0	0	0	0	0
			ERF	HORVU7Hr1G029870	0	0	0	0	0	0	0	0	0	0	0	0
			Nud	HORVU7Hr1G089930	0.022871125	0.008505068	0.04904924	0.034044615	-1.33805	0.274673	-0.535298	0.739194	-1.90711	0.141016	-1.10436	0.314136
		MIXTA	HvMIXTA	HORVU2Hr1G091630	0	0	0	0	0	0	0	0	0	0	0	0
		MIXTA	HvMIXTA	HORVU6Hr1G060650	0.039773027	0.044081292	0.0705049	0.162608723	0.148071	0.851822	1.19052	0.0903184	-1.8916	0.00920526	-0.849144	0.17257
