# Supplementary material for: WAX INDUCER 1 Regulates β-Diketone Biosynthesis by Mediating Expression of the Cer-cqu Gene Cluster in Barley
Source: Int J Mol Sci. 2023 Apr 5;24(7):6762. doi: 10.3390/ijms24076762 (PMC10095013; doi:10.3390/ijms24076762)
Supplement: Supplementary file 1 [file ijms-24-06762-s001.zip › Table_S6_win1_candidates.xlsx]

## Sheet: description
Supporting Information
Article title: WAX INDUCER 1 regulates β-diketone biosynthesis by medi-ating expression of the cer-cqu gene cluster in barley
Authors: Sophia V. Gerasimova, Ekaterina V. Kolosovskaya, Alexander V. Vikhorev, Anna M. Korotkova, Christian W. Hertig, Mikhail A. Genaev, Dmitry V. Domrachev, Sergey V. Morozov, Elena I. Chernyak, Nikolay A. Shmakov, Gennady V. Vasilyev, Alex V. Kochetov, Jochen Kumlehn, Elena K. Khlestkina
Article acceptance date:
Table S6: Expression (rpkm-normalized counts) of putative Win1-regulated genes.
field name	description
lb_wt	wild-type leaf blade
lb_win1	win1 KO leaf blade
ls_wt	wild-type leaf sheath
ls_win1	win1 KO leaf sheath
1-4 – biological replicates (each containing tissue fragments pooled from three plants, with one fragment per plant)

## Sheet: Table S6
Gene ID	lb_wt.1	lb_wt.2	lb_wt.3	lb_wt.4	lb_win1.1	lb_win1.2	lb_win1.3	lb_win1.4	ls_wt.1	ls_wt.2	ls_wt.3	ls_wt.4	ls_win1.1	ls_win1.2	ls_win1.4
HORVU0Hr1G019420	0.136888	0.0511971	0.0736002	0.221999	0.247478	0.130609	0.0667751	0.266977	1.50597	2.14108	2.03102	1.90947	0.46896	0.306808	0.0899529
HORVU0Hr1G022020	0.138259	0.0258549	0.0318589	0.0236024	0.117627	0.0329794	0.157369	0.0963037	0.326837	1.07301	1.16085	0.463365	0.208966	0.0774703	0.136281
HORVU0Hr1G027000	0.147923	0.136928	0.07158	0.0454539	0.0424739	0.0635122	0.108237	0	0.49628	1.08089	0.183746	0.156765	0.0268287	0.044758	0.0109355
HORVU0Hr1G032140	0.147923	0.136928	0.07158	0.0454539	0.0424739	0.0635122	0.108237	0	0.49628	1.08089	0.183746	0.156765	0.0268287	0.044758	0.0109355
HORVU1Hr1G051260	0.0762039	0.0748146	0.0790181	0.0487833	0.0364681	0.0681643	0	0.0159239	0.436499	0.846166	0.302381	0.258843	0.0230351	0.0384292	0.0563351
HORVU2Hr1G002570	0.0626257	0.126481	0.303046	0.57731	1.21079	0.591557	0.091648	0.518225	1.43489	1.34592	4.33042	5.23806	0.601994	0.328451	0.379637
HORVU2Hr1G002580	0	0	0	0	0.702447	0.0121198	0.0330473	0	9.7383	11.8419	13.2774	16.0897	1.37206	1.45767	1.04339
HORVU2Hr1G002630	0	0	0	0	0.229939	0.0151691	0.0206809	0	2.04682	4.22164	9.96201	9.03202	0.269124	0.313571	0.334311
HORVU2Hr1G004690	0.218575	0.0668853	0.0755491	0.0610581	0.893864	0.0426579	0.0290789	0.0871964	1.92679	1.7936	11.3437	8.48809	0.531574	0.190391	0.337861
HORVU2Hr1G009950	0.137073	0.061067	0.0278695	0.133173	0.00771733	0.0519295	0.548687	0.0606562	0.894022	1.69823	0.918112	1.31791	0.0804318	0.0813234	0.160941
HORVU2Hr1G013940	0.00397751	0.00686162	0.0081113	0.00549994	0.00380694	0.00277514	0.00349247	0.00199477	0.0013019	0.0032056	0.000823459	0.824732	0.00234454	0.000802333	0.00249938
HORVU2Hr1G036720	0.0993277	0.0208964	0.0514979	0.0190759	0.0713012	0.0266545	0	0	0.883908	1.90789	1.23382	0.951433	0.213928	0.363155	0.220289
HORVU2Hr1G107740	0.0465888	0	0	0	0.044591	0	0.272717	0.116825	1.1437	0.90114	0.771619	0.455757	0.168996	0.140967	0.172208
HORVU2Hr1G108730	0.0494177	0.0623786	0.204971	0.227776	0.141896	0.10609	0.072319	0.123918	0.222409	1.22137	1.20213	0.62443	0.0672213	0.0498421	0.219197
HORVU2Hr1G108780	0.0569715	0.0719136	0.236302	0.284476	0.0817927	0.122306	0.0833735	0.14286	0.349644	1.46929	1.38588	0.719879	0.0774966	0.0574608	0.210586
HORVU2Hr1G116700	0.219121	0.122929	1.71672	1.20636	0.279633	0.156803	0.481001	0.366307	3.1976	12.8327	19.2043	10.301	0.198709	0.110502	0.809947
HORVU2Hr1G116740	0.0628362	0.0528777	0.434378	0.176993	0.0801889	0.0449655	0	0	2.86228	9.49815	6.65623	3.36376	0.322902	0.739385	1.25423
HORVU2Hr1G116750	0.365202	0.184394	2.17115	1.57107	0.209725	0.235204	0.748224	0.641037	4.60216	17.8167	26.765	14.7668	0.331182	0.0736677	1.29591
HORVU2Hr1G122330	0.0263148	0.0110722	0.0227388	0.020215	0.0629659	0.0423694	0	0.0164965	0.366063	0.169664	0.292826	0.380775	0.00596587	0.033176	0.00486342
HORVU2Hr1G123850	0.771961	0.249407	0.671822	0.651264	0.336444	0.443905	0.716153	0.35431	1.94583	3.54032	2.78255	1.26424	0.350025	0.36844	0.642022
HORVU2Hr1G126740	0.0548808	0.159075	0.105384	0.0655814	0.326837	0.058909	0.0892377	0.0229362	5.29421	5.66148	1.80528	2.0083	0.65805	0.559672	0.599559
HORVU2Hr1G127530	0.00801126	0.0134832	0.0276904	0	0.0383386	0.0257978	0	0	0.085222	0.292697	0.53074	0.404914	0.0435899	0.0646405	0.0533022
HORVU2Hr1G127610	0	0	0	0.0775593	0.0483163	0.0541863	0	0	0.660931	1.51888	2.35149	2.38686	0.137336	0.305488	0.335871
HORVU3Hr1G002750	0.00242727	0.00153194	0.00335588	0.00419542	0.00116159	0.00390814	0.00177606	0.00304327	0.00695174	0.0136935	0.0194725	0.028197	0.0055029	0.00244812	0.00269161
HORVU3Hr1G011830	0.0374813	0.0105137	0.00863676	0.0191954	0.621816	0.0804647	0.0365673	0.125316	3.70091	4.95401	5.78098	6.16195	1.04235	1.41132	0.960568
HORVU3Hr1G064450	0.0146726	0.0987776	0.0253574	0.0281787	0.0280868	0.0157495	0.0644166	0.0459905	0.138074	0.0946009	0.265794	0.305012	0.0399173	0.0443958	0.0433879
HORVU3Hr1G117440	4.89655	3.1024	1.31767	1.41167	5.81179	1.82549	4.87737	2.49003	6.3044	7.18734	14.5561	54.3674	4.61638	3.82195	1.83946
HORVU4Hr1G080190	0.521951	0.623834	0.219628	0.098788	0.137562	0.0974367	0.188191	0.0853581	1.67748	3.42216	2.72496	0.8695	0.288113	0.770576	0.290794
HORVU5Hr1G067710	0.0278104	0	0	0	0.0266178	0.0298516	0	0	0.273083	0.597688	0.63333	0	0.0252197	0	0
HORVU5Hr1G087530	0	0	0	0	0.0511936	0	0	0	3.55397	6.035	4.97196	4.82253	0.388037	0.593412	0.245157
HORVU5Hr1G115390	0.0636299	0.0468524	0.0439865	0.0366604	0.0152253	0.0170751	0.0465588	0.00997226	0.149695	0.188032	0.197599	0.265843	0.0216385	0.0561544	0.0352797
HORVU6Hr1G000510	0.00515779	0.0173615	0.0130735	0.0145281	0.00329108	0.00738182	0.00251601	0.00431116	0.00281372	0.00554245	0.00355938	2.21587	0.00623643	0	0.002542
HORVU6Hr1G062990	0.12725	0.117791	0.0615762	0.058652	0.0487172	0.0819538	0	0	0.583112	1.25801	0.158066	0.155603	0.0230792	0.0770055	0.00940716
HORVU6Hr1G073300	0.108547	0.00913438	0.0450221	0.100063	0.509071	0.454404	0.857789	0.476329	2.00739	3.44094	5.29223	4.99075	0.72842	0.62403	0.240735
HORVU7Hr1G000980	0	0	0.00340436	0.00756629	0.131978	0	0.0072069	0.00617447	5.95607	7.86913	14.7682	16.5805	1.22813	1.54473	0.83007
HORVU7Hr1G021620	0.324933	0.109374	0.149748	0.282895	0.466498	0.209269	0.110953	0.651831	3.66927	4.89995	4.18198	3.91152	0.73666	0.710067	0.168149
HORVU7Hr1G042940	0.0837816	0.0705036	0.0579171	0.0160903	0.0601417	0.157379	0.030652	0.0787829	1.16548	2.00316	0.737172	0.324424	0.0759771	0.274629	0.0619371
HORVU7Hr1G059330	0.0174913	0.0147192	0	0.0134368	0.0167412	0.0187751	0	0	0.415075	0.770624	0.905299	0	0.0158619	0	0
