# Supplementary material for: WAX INDUCER 1 Regulates β-Diketone Biosynthesis by Mediating Expression of the Cer-cqu Gene Cluster in Barley
Source: Int J Mol Sci. 2023 Apr 5;24(7):6762. doi: 10.3390/ijms24076762 (PMC10095013; doi:10.3390/ijms24076762)
Supplement: Supplementary file 1 [file ijms-24-06762-s001.zip › Table_S8_CPMs.csv]

Table S8. Counts per million mapped read (CPM)-normalized counts of gene expression obtained using the edgeR software package. Only genes with significant level of expression are enlisted.
Geneid	lb_wt.1	lb_wt.2	lb_wt.3	lb_wt.4	lb_win1.1	lb_win1.2	lb_win1.3	lb_win1.4	ls_wt.1	ls_wt.2	ls_wt.3	ls_wt.4	ls_win1.1	ls_win1.2	ls_win1.4
EPlHVUG00000039890	0.199400275269518	0.637634247017659	0.854624696220773	0.306359046922768	0.11450973416753	0.149825189413085	0.0875421671912041	0.100001788578913	0.195800796493171	0.0857084433991602	0.20640816410377	0.2763407003309	0.235073000137502	0.20111280723888	0.3243025817617
EPlHVUG00000039881	0.279160385377326	0.55373500398902	0.689213464694172	0.336994951615045	0.229019468335059	0.214035984875836	0.466891558353089	0.300005365736738	1.14217131287683	1.0713555424895	0.722428574363194	0.877788106933448	0.397815846386542	0.60333842171664	0.427489766867695
EPlHVUG00000039856	2.07376286280299	2.61765638249355	3.25308755335649	1.33266185411404	1.41228672139953	1.02737272740401	1.31313250786806	1.52502727582842	2.17012549446597	2.57125330197481	3.48829797335371	1.43046950759525	1.46468561624136	2.71502289772488	3.8916309811404
EPlHVUG00000039852	0.498500688173796	0.738313338652026	0.620292118224755	0.275723142230492	0.324444246808001	0.23543958336342	0.846240949514973	0.450008048605108	0.440551792109634	1.32848087268698	1.0733224533396	0.585192071288965	0.452063461802889	0.543004579544976	1.34143340637794
EPlHVUG00000039857	0.199400275269518	0.268477577691646	0.248116847289902	0.0919077140768305	0.0190849556945883	0.0214035984875836	0	0.175003130013097	0.0979003982465853	0.192843997648111	0.392175511797163	0.113787347195077	0.126577769304809	0.080445122895552	0.206374370211991
EPlHVUG00000039870	0.199400275269518	0.805432733074938	1.02003592774737	0.398266760999599	0.152679645556706	0.171228787900669	0.320987946367748	0.175003130013097	0.244750995616463	0.278552441047271	0.309612246155655	0.325106706271647	0.271238077081733	0.281557930134432	0.339043608205413
EPlHVUG00000039891	0.917241266239784	2.86935411157947	3.28065609194426	1.05693871188355	0.801568139172708	0.706318750090259	1.34231323026513	1.1500205686575	1.10953784679463	1.47847064863551	1.23844898462262	1.00783078944211	1.03070469291059	1.32734452777661	1.45936161792765
EPlHVUG00000039875	0.458620633119892	0.570514852594747	0.634076387518638	0.214451332845938	0.305359291113413	0.53508996218959	0.525253003147225	0.575010284328749	0.571085656438414	1.00707420994013	0.577942859490555	0.2763407003309	0.506311077219235	0.884896351851072	0.678087216410827
EPlHVUG00000039888	0.0199400275269518	0.151018637451551	0.137842692938834	0.0612718093845537	0.11450973416753	0.128421590925502	0.0875421671912041	0.250004471447282	0.179484063452073	0.428542216995801	0.288971429745278	0.0975320118814942	0.16274284624904	0.281557930134432	0.206374370211991
EPlHVUG00000039883	0.159520220215615	0.318817123508829	0.358391001640969	0.0765897617306921	0.0954247784729415	0.0642107954627508	0	0.0500008942894564	0.0326334660821951	0.17141688679832	0.103204082051885	0.162553353135824	0.0542476154163466	0.040222561447776	0.0442230793311409
EPlHVUG00000039863	0.578260798281603	1.07391031076658	1.32328985221281	0.78121556965306	0.763398227783532	0.706318750090259	1.07968672869152	1.02501833293386	1.20743824504122	1.04992843163971	1.6099836800094	1.00783078944211	0.723301538884622	0.965341474746624	1.48884367081508
EPlHVUG00000039853	1.71484236731786	1.47662667730405	1.81952354679261	0.888441236076029	0.706143360699767	0.749125947065426	1.54657828704461	0.9750174386444	1.53377290586317	2.03557553073006	2.82779184822165	1.33293749571375	1.06686976985482	2.05135063383658	2.60916168053731
EPlHVUG00000039851	0.43868060559294	0.436276063748925	0.510017963873687	0.229769285192076	0.229019468335059	0.23543958336342	0.320987946367748	0.350006260026195	0.277384461698658	0.642813325493702	0.743069390773571	0.373872712212394	0.307403154025964	0.824562509679408	1.1940231419408
EPlHVUG00000039871	1.29610178925187	1.52696622312124	2.05385612478863	0.811851474345336	0.477123892364707	0.856143939503344	0.641975892735497	0.82501475577603	0.946370516383658	1.26419954013761	1.38293469949526	0.942809448187777	0.632888846524044	0.824562509679408	1.57728982947736
EPlHVUG00000039893	0.358920495485133	0.335596972114557	0.771919080457472	0.367630856307322	0.305359291113413	0.128421590925502	0.496072280750157	0.55000983718402	0.538452190356219	0.728521768892862	0.990759187698095	0.503915394721053	0.452063461802889	0.724006106059968	0.722310295741968
EPlHVUG00000039867	1.1166415415093	0.922891673315033	1.72303366173543	0.612718093845537	0.458038936670119	0.385264772776505	0.583614447941361	1.07501922722331	0.571085656438414	1.52132487033509	1.3416530666745	0.877788106933448	0.632888846524044	0.965341474746624	1.48884367081508
EPlHVUG00000039879	1.1166415415093	1.24170879682386	2.3295415106663	1.07225666422969	0.954247784729415	0.984565530428846	0.875421671912041	0.775013861486574	1.24007171112341	1.30705376183719	1.30037143385375	1.15412880726435	1.01262215443847	1.36756708922438	1.07609493039109
EPlHVUG00000039849	0.618140853335507	0.721533490046298	0.689213464694172	0.336994951615045	0.248104424029648	0.171228787900669	0.525253003147225	0.375006707170923	0.277384461698658	0.621386214643912	0.846273472825456	0.357617376898812	0.397815846386542	0.362003053029984	0.737051322185681
EPlHVUG00000039850	3.50944484474352	3.74190623907731	4.45231898192435	1.74624656745978	2.08026017071012	1.90492026539494	2.94725296210387	3.45006170597249	3.39388047254829	5.46391326669647	5.96519594259895	2.40578962641019	2.87512361706637	5.3697119532781	6.45656958234657
EPlHVUG00000039864	1.37586189935968	1.40950728288114	1.90222916255591	0.827169426691475	0.839738050561885	0.706318750090259	1.10886745108859	1.1500205686575	1.22375497808232	2.27127375007775	1.94023674257544	1.05659679538285	0.687136461940391	1.32734452777661	2.09322575500734
EPlHVUG00000039861	0.338980467958181	0.402716366537469	0.454880886698153	0.29104109457663	0.286274335418824	0.0428071969751672	0.262626501573612	0.350006260026195	0.310017927780853	0.514250660394961	0.371534695386786	0.195064023762988	0.16274284624904	0.241335368686656	0.574900031304832
EPlHVUG00000039873	0.119640165161711	0.335596972114557	0.248116847289902	0.122543618769107	0.11450973416753	0.0642107954627508	0.437710835956021	0.125002235723641	0.261067728657561	0.407115106146011	0.20640816410377	0.178808688449406	0.0723301538884622	0.281557930134432	0.265338475986845
EPlHVUG00000039880	0.358920495485133	0.335596972114557	0.771919080457472	0.367630856307322	0.305359291113413	0.128421590925502	0.496072280750157	0.55000983718402	0.538452190356219	0.728521768892862	0.990759187698095	0.503915394721053	0.452063461802889	0.724006106059968	0.722310295741968
AGP50735	502.109833156174	492.454996880901	515.393828898302	255.334947657781	266.521406274925	305.814615190595	265.457031646128	384.731881110222	406.841421646726	365.41794843232	446.089324261067	242.074453489869	162.39927801807	279.707692307834	246.26358776868
AGP50736	0.837481156131977	1.77866395220715	3.41849878488309	1.76156451980592	0.648888493616002	0.449475568239256	1.83838551101529	1.10001967436804	1.15848804591793	0.664240436343492	2.08472245744807	1.96689557294347	1.50085069318559	1.28712196632883	5.07091309663749
AGP50737	13.240178277896	11.8130134184324	14.1840131034061	19.361891765519	10.2486212079939	9.16074015268578	15.9034937064021	8.37514979348395	14.1629242796727	8.44228167481728	7.36877145850458	12.5978848680263	7.84782169689815	7.48139642928634	8.47609020513534
AGP50738	1.03688143140149	0.956451370526488	0.96489885057184	1.30202594942177	0.78248318347812	0.77052954555301	4.52301197154555	1.55002772297315	0.832153385095975	1.09278265333929	2.08472245744807	0.942809448187777	0.433980923330773	1.93068294949325	2.10796678145105
AGP50739	0.239280330323422	0.151018637451551	0.730566272575822	0.444220618038014	0.400784069586354	0.0642107954627508	1.51739756464754	0.300005365736738	0.489501991232926	0.14998977594853	0.639865308721686	0.650213412543295	0.271238077081733	0.482670737373312	1.01713082461624
AGP50740	53.2199334694344	41.5133454505707	49.7749964202131	41.2052918111124	48.6475520655056	45.3542251951896	43.8002643179991	62.5011178618205	48.5422807972652	45.0183598954089	51.5814002095321	39.1103367644792	38.7508799457436	41.2482367646943	39.8155124244705
AGP50741	64.0473684165693	51.5141352195846	69.1694633167071	56.4313364431739	64.3353856464571	55.7777776586429	65.18973383505	79.4514210259462	55.4442588736495	64.4313223253187	75.8550003081354	53.2037124813551	56.2909422636957	56.6937003606403	66.6146984991419
AGP50742	0.259220357850374	0.184578334663007	1.04760446633514	1.1182105212681	0.286274335418824	0.171228787900669	1.22559034067686	0.27500491859201	0.668986054684999	0.385687995296221	0.908195922056587	1.02408612475569	0.578641231107697	0.844673790403296	2.78605399786188
AGP50743	22.6319312430903	21.20972863764	38.6786596386369	60.7356810524388	17.4245645491591	16.0955060626629	37.8182162266002	12.6252258080877	23.9040139052079	11.2920874178394	10.568098002113	30.6575624014163	8.35413277411738	12.0064345921611	14.5051700206142
AGP50744	0.259220357850374	0.385936517931741	0.523802233167571	0.597400141499398	0.343529202502589	0.0642107954627508	0.437710835956021	0.27500491859201	0.473185258191829	0.0214271108497901	0.412816328207539	0.503915394721053	0.16274284624904	0.181001526514992	0.692828242854541
AGP50745	1.27616176172492	1.69476470917851	2.15034600984582	0.444220618038014	0.267189379724236	0.321053977313754	0.408530113558952	0.525009390039292	0.766886452931585	0.792803101442232	1.03204082051885	0.861532771619866	0.723301538884622	0.683783544612192	1.17928211549709
AGP50746	1.43568198194053	1.89612289244725	1.9987190476131	0.87312328372989	0.66797344931059	0.470879166726839	1.10886745108859	0.900016097210215	1.02795418158915	1.09278265333929	1.38293469949526	1.00783078944211	0.433980923330773	0.784339948231632	1.79840522613306
AGP50747	1.51544209204834	1.94646243826443	2.85334374383387	1.30202594942177	0.591633626532237	0.77052954555301	2.50954212614785	1.45002593439424	1.09322111375354	1.32848087268698	2.37369388719335	1.57676752541749	1.22961261610386	2.07146191456046	2.74183091853074
AGP50748	0.398800550539037	0.855772278892121	0.92354604269019	0.719943760268506	0.190849556945883	0.406668371264088	0.204265056779476	0.800014308631302	0.571085656438414	0.728521768892862	1.13524490257073	0.731490089111206	0.687136461940391	0.683783544612192	1.66573598813964
AGP50749	3.68890509248609	2.68477577691646	5.14153244661852	3.44653927788115	2.30927963904518	1.86211306841977	5.48597581064879	3.77506751885396	4.42183465413743	4.22114083740864	5.24276736823575	4.84408992344755	2.94745377095483	3.66025309174762	7.11991577231368
AGP50750	2.55232352344983	2.14782062153317	2.12277747125805	1.68497475807523	1.81307079098589	1.94772746237011	5.10662641948691	4.82508629893254	2.59436055353451	4.54254750015549	4.78866940720746	2.06442758482496	1.79017130873944	2.83569058206821	3.37569505561042
AGP50751	25.9419758125643	26.6128398886844	34.9431226599945	34.2662593983117	23.5317503714274	23.436940343904	56.3479749487384	23.9004274703602	29.6475039356742	26.6553258971388	21.4458082503817	28.6419008225321	16.8529258560117	19.6286099865147	21.4924165549345
AGP50752	20.0596676921135	17.3671433069283	20.3317972084781	19.2699840514421	17.8635185301346	18.7495522751232	37.6139511698207	33.8756058811067	22.3865577323858	27.5981187745296	31.374040943773	21.9284473380226	17.2326591639261	22.625190814374	25.7230911442803
AGP50753	8.39475158884672	7.51737217536608	11.7855502462703	9.71158178745176	7.55764245505696	7.66248825855493	7.58698782323769	7.65013682628683	6.72249401293219	4.97108971715129	7.12108166158006	7.36366689705281	5.64175200330005	6.21438574368139	7.59162861851252
AGP50754	40.1990954943349	36.9492266298128	53.6070232839127	37.7740704855773	31.7382813201003	35.3801482999757	44.9091317690877	43.3007744546692	29.1253684783591	28.990880979766	39.0111430156125	27.439006009327	23.3988047829175	30.1468098051081	37.8696969339003
AGP50755	36.2310300164715	28.9116791476691	43.5996437765533	25.672888132128	27.2724016875667	33.0899632618043	46.8350594472942	44.4007941290373	24.931968086797	29.0551623123153	35.9975838196974	22.3510860561758	18.5888495493348	28.9803555231226	33.1230864190245
AGP50756	1.93418267011433	2.33239895619617	3.57012574711581	1.85347223388275	1.87032565806965	1.41263750018052	3.91021680120712	3.17505678738048	2.98596214652085	3.08550396236977	4.9331551220801	2.66587499142751	2.45922523220771	3.07702595075486	5.21832336107463
AGP50757	0.87736121118588	0.906111824709305	1.35085839080058	0.87312328372989	0.973332740424003	0.321053977313754	2.65544573813319	1.50002682868369	1.24007171112341	1.62846042458404	2.55946123488674	2.01566157888421	1.93483161651636	2.1720183181799	4.2159335629021
AGP50758	3.8085452576478	5.63802913152456	7.98109192115851	11.2586949744117	6.92783891713555	7.36283787972876	3.70595174442764	8.05014398060248	4.48710158630182	3.42833773596641	5.40789389951877	7.70502893863804	5.3524313877462	5.06804274241978	5.36573362551176
AGP50759	6.65996919400191	7.43347293233745	13.839406371059	16.9110193901368	9.08443891062403	8.60424659200861	8.17060227117905	9.15016365497052	9.00683663868585	5.37820482329731	5.92391430977819	10.2083505769297	7.72124392759334	7.09928209553246	8.6529825224599
AGP50760	4.84542668904929	3.6747868446544	7.84324922821967	8.11851474345336	3.98875574016895	4.40914128844222	8.78339744151748	5.75010284328749	5.64558963221975	4.5211203893057	3.03420001232542	5.526814006618	3.74308546372792	3.66025309174762	3.80318482247812
AGP50761	3.86836534022865	3.72512639047159	4.21798640392833	2.20578513784393	2.6146389301586	2.65404621246037	5.57351797783999	5.60010016041912	3.27966334126061	4.34970350250738	5.75878777849518	2.77966233862258	2.62196807845675	3.31836131944152	4.93824385864407
AGP50762	14.6958002873635	10.2189278008883	11.4547277832171	5.422555130533	7.27136811963814	8.36880700864519	18.004505718991	15.8502834897577	8.90893624043926	13.2848087268698	15.934710268811	8.03013564490969	6.69053923468275	11.5237638547878	13.6207084339914
AGP50763	112.960255940182	108.095784718099	137.22240082061	69.160554842815	94.0697466186257	84.4371960335173	316.698380175379	242.829343116745	125.91622887815	167.217173071762	252.540388780962	144.184824231476	108.965376832968	155.761869206513	182.479166346731
AGP50765	1.87436258753347	1.34238788845823	2.55008981936844	1.74624656745978	1.20235220875906	1.11298712135435	3.41414452045696	1.85003308870989	2.18644222750707	2.63553463452418	3.24060817642918	1.9343849023163	1.30194276999232	1.99101679166491	3.67051558448469
AGP50766	1.41574195441358	1.39272743427541	2.53630555007455	1.24075414003721	1.12601238598071	0.599300757652341	2.68462646053026	1.25002235723641	1.38692230849329	1.13563687503887	2.02280000821694	1.51174618416316	1.30194276999232	1.22678812415717	3.21354376472957
AGP50767	5.18440715700747	4.5137792749408	5.51370771755337	3.29335975441976	3.56888671488801	3.57440094742646	7.58698782323769	6.07510865616895	4.58500198454841	5.78531992944332	7.22428574363194	4.82783458813396	3.63459023289522	4.80659609300923	8.52031328446648
AGP50768	4.98500688173796	3.85936517931741	4.27312348110387	3.99798556234213	3.70248140475013	3.44597935650096	6.65320470653151	5.17509255895874	6.03719122520609	3.10693107321956	4.4790571610518	4.242642516845	2.76662838623368	3.1775823543743	4.79083359420693
AGP50769	0.977061348820639	1.07391031076658	1.54383816091494	1.28670799707563	0.78248318347812	0.642107954627508	1.51739756464754	1.37502459296005	1.24007171112341	1.22134531843803	1.71318776206129	1.07285213069644	1.06686976985482	1.20667684343328	3.02191042096129
AGP50770	2.71184374366545	2.31561910759045	2.8257752052461	1.80751837684433	2.08026017071012	1.81930587144461	2.7429879053244	3.97507109601178	2.80647808306878	3.29977507086767	5.53173879798103	2.11319359076571	2.22415223207021	2.8558018627921	4.40756690667038
AGP50771	3.2302844593662	2.98681305181956	3.95608528734455	2.34364670895918	2.51921415168565	2.3543958336342	4.11448185798659	4.875087193222	3.45914740471268	3.77117150956305	5.92391430977819	2.81217300924975	2.11565700123752	3.19769363509819	5.48366183706147
AGP50772	0.239280330323422	0.167798486057279	0.165411231526601	0.214451332845938	0.133594689862118	0.256843181851003	0.641975892735497	0.225004024302554	0.0815836652054877	0.664240436343492	0.350893878976409	0.0975320118814942	0.0361650769442311	0.382114333753872	0.191633343768277
AGP50773	0.43868060559294	1.05713046216086	2.19169881772747	2.55809804180512	1.24052212014824	0.791933144040593	0.612795170338429	0.400007154315651	1.50113943978097	0.385687995296221	0.68114694154244	1.88561889637555	1.03070469291059	0.724006106059968	1.82788727902049
AGP50774	0.418740578065988	0.46983576096038	1.24058423644951	1.99133380499799	0.89699291764565	0.791933144040593	0.992144561500313	0.675012072907661	0.815836652054877	0.14998977594853	1.50677959795752	1.59302286073107	0.904126923605777	0.864785071127184	1.79840522613306
AGP50775	0.478560660646844	0.402716366537469	1.61275950738436	2.57341599415125	1.83215574668048	2.18316704573353	1.28395178547099	0.575010284328749	1.3542888424111	0.749948879742652	1.36229388308488	1.51174618416316	1.33810784693655	1.24689940488106	1.69521804102707
AGP50776	0.598200825808555	0.402716366537469	2.1641302791397	3.81417013418847	1.45045663278871	1.41263750018052	0.904602394309109	0.600010731473477	1.3053386432878	0.299979551897061	0.619224492311309	1.04034146006927	0.506311077219235	0.683783544612192	1.57728982947736
AGP50777	0.378860523012085	0.671193944229115	0.96489885057184	0.643353998537814	0.648888493616002	0.385264772776505	0.729518059926701	0.55000983718402	0.456868525150731	0.857084433991602	0.928836738466964	0.633958077229712	0.452063461802889	0.543004579544976	1.22350519482823
AGP50779	1.67496231226395	2.33239895619617	3.01875497536047	1.7922004244982	1.10692743028612	1.36983030320535	2.15937345738303	1.85003308870989	1.48482270673988	1.73559597883299	1.56870204718865	1.23540548383226	0.831796769717315	1.08600915908995	1.44462059148394
AGP50780	33.8781067682912	29.4150746058409	33.0960305746141	26.1324267025121	26.3181539028373	29.8580198901791	38.7519993433064	41.6257444959724	32.6334660821951	40.925781723099	42.272392008452	25.45585510107	21.0299922430704	32.5400522112508	34.6119300898396
AGP50781	0.917241266239784	0.755093187257754	2.27440443349077	2.02196970969027	0.591633626532237	0.363861174288921	0.641975892735497	0.725012967197118	0.979003982465853	0.192843997648111	0.949477554877341	1.33293749571375	0.669053923468275	0.945230194022736	2.24063601944447
AGP50782	0.578260798281603	0.436276063748925	1.44734827585776	0.811851474345336	0.477123892364707	0.492282765214423	0.350168668764816	0.650011625762933	0.897420317260365	0.771375990592442	0.722428574363194	0.861532771619866	0.343568230970195	0.522893298821088	1.06135390394738
AGP50783	2.93118404646192	2.68477577691646	3.43228305417698	2.15983128080552	2.00392034793177	2.07614905329561	3.96857824600125	3.52506304740668	2.82279481610988	3.4497648468162	3.24060817642918	2.32451294984228	1.73592369332309	2.43346496759045	2.5944206540936
AGP50784	9.83043357078725	9.01077870127586	12.1715097864991	8.76186874199118	7.25228316394355	8.13336742528177	9.1335661102823	12.0752159709037	9.62687249424755	9.40650166305784	11.4762939241696	8.33898701586775	5.6959996187164	7.3808400256669	9.33106973887073
AGP50785	9.75067346067944	8.67518172916131	11.6614918226254	7.30666326910803	6.54613980324378	6.31406155383716	9.80472272541486	8.97516052495742	9.02315337172694	9.47078299560721	11.3111673928866	7.29864555579848	4.46638700261254	6.91828056901747	8.46134917869162
AGP50786	0.817541128605025	1.25848864542959	1.72303366173543	1.21011823534494	1.08784247459153	0.77052954555301	1.34231323026513	0.925016544354943	1.3216553763289	0.835657323141812	1.65126531283016	1.30042682508659	1.15728246221539	1.46812349284382	3.22828479117328
AGP50787	0.418740578065988	0.352376820720285	0.675429195400288	0.520810379768706	0.381699113891766	0.492282765214423	0.466891558353089	0.700012520052389	0.424235059068536	0.299979551897061	0.804991840004702	0.438894053466724	0.632888846524044	0.583227140992752	1.06135390394738
AGP50788	0.119640165161711	0.134238788845823	0.192979770114368	0.168497475807523	0.11450973416753	0	0.029180722397068	0.0750013414341846	0.0652669321643902	0.192843997648111	0.123844898462262	0.130042682508659	0.144660307776924	0.221224087962768	0.398007713980268
AGP50789	1.05682145892845	0.822212581680665	1.04760446633514	0.750579664960783	0.591633626532237	0.577897159164757	1.75084334382408	1.25002235723641	1.14217131287683	0.407115106146011	0.763710207183948	0.764000759738371	1.03070469291059	1.28712196632883	1.87211035835163
AGP50790	0.87736121118588	0.872552127497849	1.69546512314766	1.13352847361424	0.706143360699767	0.577897159164757	2.01346984539769	0.700012520052389	0.913737050301463	0.578531992944332	0.88755510564621	0.796511430365536	0.904126923605777	0.764228667507744	2.40278731032532
AGP50791	0.358920495485133	0.755093187257754	1.00625165845349	0.643353998537814	0.820653094867297	0.492282765214423	1.86756623341235	0.700012520052389	0.668986054684999	0.492823549545171	1.03204082051885	0.877788106933448	0.831796769717315	1.0055640361944	2.07848472856362
AGP50792	0.717840990970266	0.822212581680665	0.895977504102423	0.612718093845537	0.438953980975531	0.663511553115092	1.22559034067686	1.20002146294695	0.717936253808292	0.921365766540973	1.40357551590563	0.682724083170459	0.795631692773084	1.20667684343328	1.9458154905702
AGP50793	0.498500688173796	0.654414095623387	0.96489885057184	0.551446284460983	0.343529202502589	0.214035984875836	0.787879504720837	0.425007601460379	0.473185258191829	0.428542216995801	0.743069390773571	0.536426065348218	0.632888846524044	0.40222561447776	1.68047701458335
AGP50794	0.558320770754651	0.520175306777564	0.813271888339123	0.49017447507643	0.496208848059296	0.492282765214423	1.54657828704461	0.9750174386444	0.668986054684999	0.514250660394961	1.11460408616036	0.61770274191613	0.904126923605777	1.10612043981384	1.59203085592107
AGP50795	0.677960935916362	0.872552127497849	0.92354604269019	0.735261712614644	0.78248318347812	0.53508996218959	1.4590361198534	0.82501475577603	1.3053386432878	1.17849109673845	1.40357551590563	1.26791615445942	1.2838602315202	1.18656556270939	2.09322575500734
AGP50796	0.458620633119892	0.570514852594747	0.537586502461454	0.367630856307322	0.572548670837649	0.449475568239256	1.31313250786806	0.900016097210215	0.636352588602804	0.492823549545171	1.36229388308488	0.796511430365536	1.06686976985482	0.884896351851072	1.65099496169593
AGP50797	0.0797601101078073	0.201358183268734	0.192979770114368	0.0919077140768305	0.11450973416753	0.0642107954627508	0.14590361198534	0.175003130013097	0.13053386432878	0.235698219347691	0.227048980514147	0.130042682508659	0.0723301538884622	0.321780491582208	0.265338475986845
AGP50798	5.28410729464223	6.39312231878232	10.1176536617104	7.49047869726169	5.55372210712519	3.57440094742646	5.54433725544293	5.90010552615585	8.32153385095975	5.24964215819857	10.3410490215989	10.8910746601002	7.5585010813443	7.36072874494301	13.9302699893094
AGP50799	4.22728583571379	5.31921200801573	6.36833241377415	5.68296032041735	4.33228494267154	3.76703333381471	5.86532520181068	5.25009390039292	5.77612349654853	4.75681860865339	5.61430206362254	6.30707010166996	4.35789177177985	4.70603968938979	6.41234650301543
AGP50800	0.299100412904277	0.419496215143197	0.84084042692689	0.520810379768706	0.11450973416753	0.0428071969751672	0.933783116706177	0.0500008942894564	0.473185258191829	0.321406662746851	0.288971429745278	0.520170730034636	0.16274284624904	0.321780491582208	0.781274401516822
AGP50801	357.006252842545	321.887835803678	381.78290663269	509.168735985641	333.414175984457	388.090047776866	445.8814382272	294.855273624924	486.548662552488	400.472701782576	308.662768600777	429.807321026431	269.321328003689	318.12023849046	218.977947821366
AGP50802	1.35592187183272	1.25848864542959	2.52252128078067	1.73092861511364	0.973332740424003	0.470879166726839	0.962963839103245	1.12502012151277	1.74589043539744	1.0713555424895	2.20856735591034	2.2107256026472	0.922209462077893	1.62901373863493	2.78605399786188
AGP50803	0.0398800550539036	0.134238788845823	0.0827056157633006	0.275723142230492	0.0763398227783532	0.0642107954627508	0.525253003147225	0.200003577157826	0.195800796493171	0.12856266509874	0.577942859490555	0.146298017822241	0.126577769304809	0.221224087962768	0.545417978417404
AGP50804	0.578260798281603	1.19136925100668	1.9987190476131	1.07225666422969	0.362614158197178	0.449475568239256	1.31313250786806	1.05001878007858	0.848470118137072	0.835657323141812	0.928836738466964	0.975320118814942	0.560558692635582	0.522893298821088	0.751792348629395
AGP50805	26.2610162529956	39.8521404386037	70.5341059768015	104.407163191279	54.6783980649954	36.3861174288921	29.0348187850827	37.3756684813687	62.2483365517871	24.7483130315075	37.7520532145795	86.9172779217249	46.4178762579206	34.3098449149529	42.9848331098689
AGP50806	310.565928732275	266.14517873545	293.301682035252	384.051701222383	267.45656910396	339.974758376778	381.829752565635	245.379388725507	403.757559101959	361.046817818962	248.06133161991	324.927897583198	215.037547510398	265.187347625187	156.136952091815
AGP50807	0.159520220215615	0.352376820720285	0.510017963873687	0.336994951615045	0.190849556945883	0.128421590925502	0	0.200003577157826	0.342651393863048	0.364260884446431	0.743069390773571	0.34136204158523	0.16274284624904	0.341891772306096	0.545417978417404
AGP50808	0.398800550539037	0.570514852594747	0.895977504102423	0.536128332114845	0.209934512640471	0.0856143939503344	0.262626501573612	0.125002235723641	0.668986054684999	0.385687995296221	0.598583675900932	0.747745424424789	0.361650769442311	0.241335368686656	1.1940231419408
AGP50809	0.43868060559294	0.55373500398902	0.827056157633006	0.628036046191675	0.305359291113413	0.23543958336342	0.29180722397068	0.500008942894564	0.407918326027439	0.342833773596641	0.763710207183948	0.503915394721053	0.32548569249808	0.442448175925536	1.17928211549709
AGP50810	0.518440715700747	0.268477577691646	0.48244942528592	0.260405189884353	0.171764601251295	0.149825189413085	0.612795170338429	0.200003577157826	0.326334660821951	0.342833773596641	0.516020410259424	0.243830029703736	0.16274284624904	0.382114333753872	0.6486051635234
HORVU1Hr1G000010	20.0596676921135	16.0079755698644	13.1501929063648	17.9373221973281	23.1691362132302	23.9720303060936	27.5466019428322	19.4003469843091	22.6313087280023	26.1839294584435	20.7027388596081	17.1818894264566	19.1313257034982	22.4240780071351	18.7653266628474
HORVU1Hr1G000020	83.189794842443	88.2116641203114	79.2181956319481	74.7669254015016	70.1562971333066	85.8284299352102	54.888938828885	53.2009515239816	72.2178604398977	69.4238391533198	48.9393757090038	48.7660059407471	38.7327974072715	44.7274883299269	29.909542654295
HORVU1Hr1G000030	0.119640165161711	0.100679091634367	0.151626962232718	0.168497475807523	0.267189379724236	0.171228787900669	0.029180722397068	0.225004024302554	0.277384461698658	0.214271108497901	0.144485714872639	0.113787347195077	0.343568230970195	0.221224087962768	0.235856423099418
HORVU1Hr1G000040	30.209141703332	33.2073203907354	29.9807857141965	21.8434000455934	37.0629839588905	31.6559221631361	72.4265529895229	54.2509703040602	28.5053326227974	29.6551214161094	46.7308083530935	29.1620715525668	69.7262683484775	59.9115052764623	99.192366939749
HORVU1Hr1G000060	17.4674641136098	24.7670565420543	27.2790689325953	32.8416898301208	30.3069096430062	29.558369511353	28.9472766178915	28.8255155578716	34.118288788935	33.4905742582219	32.5712082955749	41.3048070318128	28.8597314014964	30.7300369461009	29.8358375220764
HORVU1Hr1G000080	76.0911450428482	58.3770932993272	56.9014636451508	59.0353883420175	47.979578616195	55.9704100450311	59.0326014092686	37.5506716113818	58.3649540880059	70.9880182453545	52.6547226628717	53.8376705585848	58.5874246496544	54.5417933231843	50.5912027548252
HORVU1Hr1G000090	12.7217375621953	16.6791695140935	11.9923142856786	12.1165003057955	12.0235220875906	8.75407178142169	12.7227949651217	10.6501904836542	14.8645438004399	16.9488446821839	15.0265143467544	17.6858048211776	18.2995289337809	17.8789285635364	19.8119395403511
HORVU1Hr1G000110	41.2758569807903	40.758252263313	38.6924439079308	37.9732038660771	24.0279592194867	32.9401380723912	22.4691562457424	26.675477103425	25.4541035441122	22.2627681729319	24.2529592821929	27.243941985564	18.2271987798925	20.6140627419852	15.6107470038927
HORVU1Hr1G000120	108.094889223606	93.2623985506355	77.1919080457472	47.470334320683	47.1398405656331	47.1093202711715	43.0999269804695	32.6755844181598	52.18091226543	57.8103450727336	38.4332001561219	35.2090562892194	25.2251411686012	26.9893387314577	9.69959539996357
HORVU1Hr1G000140	23.3098921790067	68.3107636739181	36.1699226271501	39.4590452436526	38.055401655009	35.465762693926	20.0471562867857	33.2255942553438	34.1019720558939	29.0980165340149	29.1448327714523	36.1681210727208	35.676848405484	25.2195460277556	30.4697016591561
HORVU1Hr1G000160	0	0	0	0	0	0	0	0	0.0652669321643902	0.192843997648111	0.660506125132063	0.195064023762988	0.542476154163466	0.020111280723888	0.0737051322185681
HORVU1Hr1G000170	0	0	0.0137842692938834	0.0153179523461384	6.71790440449508	0.0428071969751672	3.26824090847162	0.950016991499671	1.53377290586317	2.63553463452418	11.7652653539149	2.32451294984228	2.6762156938731	6.05349549789029	6.85457729632684
HORVU1Hr1G000210	0.279160385377326	0.503395458171836	0.675429195400288	0.827169426691475	1.48862654417789	0.663511553115092	0.496072280750157	0.575010284328749	1.61535657106866	2.39983641517649	2.24984898873109	2.22698093796078	1.80825384721155	1.72957014225437	1.66573598813964
HORVU1Hr1G000230	1.23628170667101	1.40950728288114	0.84084042692689	0.245087237538215	0.305359291113413	0.342457575801338	0.175084334382408	0.0250004471447282	2.83911154915097	2.09985686327943	0.412816328207539	0.796511430365536	0.65097138499616	0.462559456649424	0.442230793311409
HORVU1Hr1G000250	0.518440715700747	0.520175306777564	0.716782003281939	1.1948002829988	1.81307079098589	1.02737272740401	1.05050600629445	1.40002504010478	1.89274103276732	3.27834796001788	2.18792653949996	3.05600303895348	2.4411426937356	2.39324240614267	2.13744883433848
HORVU1Hr1G000260	0.159520220215615	0.201358183268734	0.137842692938834	0.122543618769107	0.190849556945883	0.107017992437918	0.0583614447941361	0.250004471447282	0.310017927780853	0.278552441047271	0.227048980514147	0.292596035644483	0.144660307776924	0.241335368686656	0.368525661092841
HORVU1Hr1G000270	5.4236874873309	4.78225685263244	4.78314144497755	5.68296032041735	5.64914688559813	5.86458598559791	5.51515653304586	4.0750728845907	7.17936253808292	7.49948879742652	5.96519594259895	6.4533681194922	4.80995523358273	6.33505342802472	5.11513617596863
HORVU1Hr1G000290	58.3245805163341	79.2512249648527	84.3872966171544	107.807748612122	113.002022667657	118.51172482575	50.3951075797365	84.5765126906155	89.5951811286666	75.4448573021108	67.8050819080884	79.6511430365536	85.4761593576902	74.874298135035	69.3417883912289
HORVU1Hr1G000310	17.2880038658672	14.6823675300119	11.3031008209844	10.6766127852585	10.4967256320236	11.4081179938821	13.9775660281956	8.50015202920759	12.1559661156177	14.9561233731535	10.5474571857026	7.88383762708745	8.28180262022892	10.1763080462873	7.44421835407538
HORVU1Hr1G000340	4.24722586324074	17.3503634583226	2.53630555007455	0.260405189884353	0.0190849556945883	0	0	0	0	0.10713555424895	0.825632656415079	38.9315280760298	2.06140938582117	0.040222561447776	0.0294820528874273
HORVU1Hr1G000350	63.4092875357068	88.0942051800713	58.7485557305312	55.6807567782132	57.94192548877	67.6139676222766	76.3951312355241	64.751158104846	39.2091094977574	38.0331217583774	46.5244001889897	142.559290700117	63.5782052679583	43.3800325214264	43.3828408238492
HORVU1Hr1G000430	49.2319279640441	47.1178148848838	42.6347449259815	44.039112995148	44.6778812810312	56.2914640223449	70.0337337529633	56.7010141242435	28.7500836184139	28.6266200953195	31.5185266586456	32.8357773334364	32.5666517882801	33.8875080197513	31.7816530126466
HORVU1Hr1G000440	14.4365799295131	60.2899960403802	10.0625165845349	1.16416437830652	0.954247784729415	0.128421590925502	0.0875421671912041	0.27500491859201	0.0979003982465853	0.492823549545171	8.42145309543381	138.39792485984	37.8648355606099	0.462559456649424	0.751792348629395
HORVU1Hr1G000450	0.757721046024169	2.60087653388782	0.620292118224755	0.0459538570384153	0.171764601251295	0	0	0.0500008942894564	0	0	0.866914289235833	8.98920042841105	4.62912984886158	0.10055640361944	0.191633343768277
HORVU1Hr1G000470	1.33598184430577	6.79583868531979	1.81952354679261	0.168497475807523	0.286274335418824	0	0	0.150002682868369	0	0.0214271108497901	3.4057347077122	14.6298017822241	24.3933443988839	0.060333842171664	0.3243025817617
HORVU1Hr1G000520	19.3617667286702	11.9472522072782	13.5637209851813	21.3685435228631	11.6036530623097	12.028822350022	4.31874691476607	11.5252061337197	19.4821792510705	15.6417909203467	13.5197347487969	7.23362421454415	6.69053923468275	8.94951992213016	4.61394127688237
HORVU1Hr1G000530	24.3268335828812	30.0527088528586	24.6187049588758	25.9332933220124	33.5513521110862	26.0481793593892	23.1111321384779	22.7754073488474	25.42147007803	26.8267427839372	27.9476654196504	26.9188352792924	33.6696866350791	30.4283677352425	40.3019662971131
HORVU1Hr1G000560	2.1934030279647	7.33279384070308	4.96233694579804	1.01098485484514	0.419869025280942	0.29965037882617	0.175084334382408	0.250004471447282	4.06286652723329	2.82837863217229	1.19716735180186	1.41421417228167	2.0975744627654	1.26701068560494	2.00477959634505
HORVU1Hr1G000600	35.2938487227047	34.0295329724161	29.8705115598454	33.8526746849659	22.5202477196142	24.8495778440846	14.8529877001076	17.1003058469941	20.6569840300295	23.0769983852239	16.8222653744572	16.8730380554985	13.0917578538117	13.0924437512511	12.5446135036003
HORVU1Hr1G000620	8.79355213938575	9.11145779291023	9.71790985218782	12.1318182581416	11.7563327078664	12.9277734865005	12.9270600219011	12.5752249137983	14.3097748770425	13.4347985028184	12.1368000493017	13.9308223637401	11.6089896990982	13.4544468042811	11.940231419408
HORVU1Hr1G000660	40.6975961825087	39.5668830123063	44.8953650901783	29.0581556006246	23.1500512575356	18.813763070586	15.4657828704461	24.0254297060838	49.847619440553	33.3191573714235	29.619571548891	45.2223428423861	28.6969885552474	26.7681146434949	31.5457965895472
HORVU1Hr1G000690	0.0997001376347591	0.167798486057279	0.0551370771755337	0.0459538570384153	0.248104424029648	0.192632386388252	0.14590361198534	0.525009390039292	0.0815836652054877	0.12856266509874	0.185767347693393	0.0975320118814942	0.253155538609618	0.140778965067216	0.309561555317986
HORVU1Hr1G000710	154.953953911943	153.116118527267	146.41650843963	96.9320024463639	72.4464918166571	91.5217871329075	176.718454836644	138.577478523228	63.7821094576503	68.7167444952767	103.699461645734	82.0244219923366	112.545719450447	95.7296962457069	135.779594573046
HORVU1Hr1G000720	49.1521678539362	39.8185807413922	43.5996437765533	78.6117314403824	44.2580122557502	50.0844204609456	102.949588616856	62.0261093660707	56.9617150464715	70.4094862524101	61.7986043326687	74.1243290299356	37.557432406584	45.1699365058524	46.7290538265722
HORVU1Hr1G000810	0.239280330323422	0.805432733074938	0.909761773396307	0.704625807922367	0.591633626532237	0.385264772776505	0.0583614447941361	0.225004024302554	6.57564341556231	4.56397461100528	3.24060817642918	3.70621645149678	3.81541561761638	2.93624698568765	0.663346189967113
HORVU1Hr1G000860	0.0797601101078073	0.201358183268734	0.248116847289902	0.214451332845938	0.324444246808001	0.0856143939503344	0.29180722397068	0.325005812881467	0.0815836652054877	0.192843997648111	0.227048980514147	0.162553353135824	0.777549154300968	0.40222561447776	1.12031800972224
HORVU1Hr1G000940	14.7955004249983	13.4238788845823	10.5173974712331	9.66562793041335	8.01568139172708	8.77547537990928	16.6913732111229	8.27514800490503	6.31457568690475	10.9278265333929	10.7745061662168	7.73753960926521	8.46262800495007	9.7137485896379	8.5497953373539
HORVU1Hr1G000960	15.1344808929564	12.1821700877584	13.481015369418	17.5543733886746	10.9356796129991	12.1786475394351	13.9192045834015	11.3752034508513	12.873902369426	15.1703944816514	13.0656367877686	12.0939694733053	8.35413277411738	8.86907479923461	7.50318245985024
HORVU1Hr1G000990	30.8472225841945	63.6291859129201	17.1751995401788	10.1864383101821	5.24836281601178	6.29265795534958	7.17845770967874	5.20009300610347	15.9903983802756	11.5492127480368	6.83211023183478	7.47745424424789	6.07573292663082	7.13950465698024	4.59920025043865
HORVU1Hr1G001120	0.319040440431229	0.184578334663007	0.358391001640969	0.275723142230492	0.267189379724236	0.149825189413085	1.19640961827979	0.27500491859201	0.163167330410975	0.12856266509874	0.350893878976409	0.211319359076571	0.144660307776924	0.362003053029984	0.147410264437136
HORVU1Hr1G001200	3.60914498237828	2.85257426297374	2.31575724137242	2.7112775652665	2.19476990487765	2.52562462153486	0.992144561500313	1.42502548724951	2.41487649008244	2.8069515213225	2.43561633642448	1.59302286073107	1.30194276999232	1.44801221211994	1.03187185105995
HORVU1Hr1G001220	22.5521711329825	51.0442994586242	9.69034131360005	2.15983128080552	0.286274335418824	0.428071969751672	0.29180722397068	0.325005812881467	4.24235059068536	3.21406662746851	0.619224492311309	1.02408612475569	1.24769515457597	1.30723324705272	0.678087216410827
HORVU1Hr1G001270	2.91124401893497	4.37954048609497	4.45231898192435	5.34596536880231	6.14535573365743	6.42107954627508	4.78563847311916	4.10007333173542	4.91133664537036	5.78531992944332	5.07764083695274	5.28298397691427	4.41213938719619	5.06804274241978	4.71712846198836
HORVU1Hr1G001460	0.0199400275269518	0	0.0275685385877669	0.0153179523461384	0	0	0	0	0	0.0428542216995801	0	0	0.723301538884622	1.22678812415717	2.80079502430559
HORVU1Hr1G001480	0	0	0	0	0.0572548670837649	0	0.029180722397068	0	0	0	0	0	0.632888846524044	1.12623172053773	1.65099496169593
HORVU1Hr1G001490	0.0398800550539036	0.0503395458171836	0.179195500820485	0.137861571115246	0.11450973416753	0.23543958336342	0	0.125002235723641	0.342651393863048	0.214271108497901	0.392175511797163	0.308851370958065	0.126577769304809	0.221224087962768	0.0442230793311409
HORVU1Hr1G001510	48.9328275511398	46.2956023032032	41.6422775368219	60.306778386747	52.9416670967879	50.1272276579208	41.5241679710278	30.075537915108	229.462216756955	310.971659763003	247.751719373755	208.620973414516	89.4904828984998	176.396043229222	58.4481698493245
HORVU1Hr1G001560	1.97406272516823	1.56052592033269	1.55762243020883	1.57774909165226	1.75581592390212	1.02737272740401	1.28395178547099	1.32502369867059	6.13509162345268	7.30664479977841	7.38941227491496	3.51115242773379	2.38689507831925	3.0166921085832	1.45936161792765
HORVU1Hr1G001570	37.4673117231425	33.3415591795813	26.9758150081299	43.273215377841	35.8033768830476	35.8510274667025	27.429879053244	16.1502888554944	187.267145112677	262.203555468881	210.453764120204	170.599744116047	66.67031934669	144.117437667381	38.3266687536554
HORVU1Hr1G001590	3.8484253127017	4.71513745820953	5.16910098520629	5.92804755795557	5.2101929046226	5.39370681887107	5.69024086742827	6.70011983478716	2.28434262575366	2.65696174537397	3.01355919591504	4.06383382839559	6.31080592676832	5.30937811110643	7.01672858720769
HORVU1Hr1G001630	0.239280330323422	0.201358183268734	0.496233694579804	0.49017447507643	0.66797344931059	0.363861174288921	0.175084334382408	0.500008942894564	0.489501991232926	0.214271108497901	0.330253062566032	0.227574694390153	0.198907923193271	0.382114333753872	0.250597449543132
HORVU1Hr1G001660	68.2547142247561	52.2524485582366	48.0519627584777	48.8642679841816	34.9636388324857	58.2177878862274	24.9203369270961	46.3258285591813	54.6284222215946	34.2833773596641	24.5419307119382	36.2493977492887	30.053178940656	28.4172396628537	21.5956037400405
HORVU1Hr1G001670	11.0667152774583	12.6184461515074	10.3244177011187	10.7838384516814	6.58430971463296	8.94670416780995	3.18069874128042	7.52513459056319	14.0323904153439	7.07094658043072	6.02711839183008	10.2733719181841	8.95085654369719	7.62217539435355	7.04621064009511
HORVU1Hr1G001680	0	0.0838992430286393	0.096489885057184	0.0919077140768305	0.0190849556945883	0.0214035984875836	0	0	0.587402389479512	0.514250660394961	0.660506125132063	0.5526814006618	0.253155538609618	0.543004579544976	0.0442230793311409
HORVU1Hr1G001710	0	0.0167798486057279	0.0137842692938834	0.0153179523461384	1.54588141126165	0.0428071969751672	0.29180722397068	0.700012520052389	0.0652669321643902	0	0.0619224492311309	0.0975320118814942	1.15728246221539	0.442448175925536	1.01713082461624
HORVU1Hr1G001750	5.84242806539688	7.39991323512599	8.07758180621569	9.45117659756741	9.75241235993462	9.22495094814853	11.6139275140331	8.6001538177865	15.6314302533714	18.5344508850684	13.7055020964903	13.2968642865104	10.5421199292434	14.2790093139605	13.1342545613488
HORVU1Hr1G001760	4.3469260008755	7.38313338652026	8.69787392444045	5.98931936734012	7.76757696769743	3.72422613683955	2.45118068135371	3.35005991739358	8.22363345271316	5.99959103794122	8.35953064620267	12.1264801439324	9.31250731313951	7.48139642928634	11.6896339698649
HORVU1Hr1G001770	3.48950481721657	2.61765638249355	6.38211668306803	9.80348950152859	5.34378759448472	4.70879166726839	6.44893964975204	8.17514621632612	11.209595599234	7.84232257102316	9.04067758774512	12.532863526772	10.0358088520241	7.64228667507744	6.26493623857829
HORVU1Hr1G001800	7.6170905152956	8.65840188055558	8.3256986535056	5.69827827276349	7.8248318347812	5.2224780309704	5.89450592420774	4.22507556745906	11.0627450018641	11.742056745685	12.2606449477639	10.9073299954138	8.48071054342219	8.96963120285405	12.0581596309577
HORVU1Hr1G001890	146.678842488258	122.828491793928	110.49470265977	154.849180267113	128.747111115693	181.887779947485	242.316718785253	175.528139403137	104.166023734367	102.0359018667	85.3291350404984	92.053963880817	80.123727969944	97.9017145638868	57.342592866046
HORVU1Hr1G001910	31.2061430796796	30.9923803747794	31.6073294908747	29.3185607905089	21.3942353336335	21.4250020860712	21.0684815706831	20.8003720244139	24.6056334259751	25.6911059088983	21.5902939652543	22.4648734033708	29.8723535559349	27.9345689254804	34.1254762171971
HORVU1Hr1G001920	1.03688143140149	1.04035061355513	1.24058423644951	1.02630280719127	1.94666548084801	1.4340410986681	2.85971079491267	1.25002235723641	1.61535657106866	2.01414841988027	1.96087755898581	1.85310822574839	4.70146000275004	2.75524545917266	2.37330525743789
HORVU1Hr1G001950	0.0997001376347591	0.0503395458171836	0.0275685385877669	0.107225666422969	0.152679645556706	0.107017992437918	0.29180722397068	0.100001788578913	2.95332868043866	4.54254750015549	1.81639184411317	1.28417148977301	1.06686976985482	1.58879117718715	0.530676951973691
HORVU1Hr1G001960	0.0199400275269518	0.0167798486057279	0.0275685385877669	0	0.0190849556945883	0	0.116722889588272	0	0.277384461698658	0.278552441047271	0.144485714872639	0.178808688449406	0.0904126923605777	0.120667684343328	0.103187185105995
HORVU1Hr1G001990	0.239280330323422	0.302037274903102	0.0827056157633006	0.29104109457663	0.305359291113413	0.342457575801338	0	0.150002682868369	0.326334660821951	0.428542216995801	0.454097961028293	0.292596035644483	0.216990461665387	0.321780491582208	0.206374370211991
HORVU1Hr1G002060	0	0	0.0137842692938834	0.0306359046922768	0.0763398227783532	0	0.029180722397068	0	0.473185258191829	0.17141688679832	0.0825632656415079	0.292596035644483	0.596723769579813	0.10055640361944	0.294820528874273
HORVU1Hr1G002090	0.119640165161711	0.55373500398902	0.151626962232718	0.0306359046922768	0.66797344931059	0.0428071969751672	0	0.575010284328749	0	0	0	4.77906858219322	0.0180825384721155	0	0
HORVU1Hr1G002100	0.319040440431229	0.687973792834843	0.978683119865724	0.413584713345737	0.305359291113413	0.0856143939503344	0.525253003147225	0.375006707170923	0.0652669321643902	0.0428542216995801	0.350893878976409	1.85310822574839	0.433980923330773	0.784339948231632	1.13505903616595
HORVU1Hr1G002150	125.223372869257	167.227971204684	132.756297569391	120.337833631263	92.9628191883396	103.935874255706	46.6016136681177	85.176523422089	59.0665736087731	47.053935426139	48.3407920331029	65.6552993315592	59.4553864963159	50.3184243711678	51.7410028174348
HORVU1Hr1G002160	0	0.117458940240095	0.096489885057184	0.0306359046922768	0.133594689862118	0.0214035984875836	0.204265056779476	0.0250004471447282	3.63863146816475	5.12107949309982	7.12108166158006	4.61651522905739	4.41213938719619	5.027820180972	3.52310532004756
HORVU1Hr1G002240	8.07571114841549	7.26567444628017	7.12646722493774	8.7312328372989	8.37829554992426	7.89792784191835	9.19192755507643	7.92514174487884	8.25626691879536	8.74226122671434	7.63710207183948	6.77847482576385	6.34697100371256	7.48139642928634	6.89880037565798
HORVU1Hr1G002260	5.40374745980394	3.74190623907731	2.81199093595222	2.61936985118967	2.02300530362636	3.21053977313754	3.6475902996335	2.15003845444663	1.74589043539744	3.38548351426683	2.74522858258014	2.3082576145287	1.91674907804425	2.09157319528435	1.70995906747078
HORVU1Hr1G002300	0.43868060559294	0.251697729085918	0.330822463053202	0.183815428153661	0.209934512640471	0.29965037882617	0.233445779176544	0.225004024302554	1.3216553763289	0.942792877390763	0.928836738466964	0.682724083170459	0.307403154025964	0.5027820180972	0.191633343768277
HORVU1Hr1G002310	6.56026905636715	3.99360396816323	3.88716394087513	4.48816003741856	3.54980175919342	4.36633409146705	8.43322877275266	4.62508272177472	4.32393425589085	6.06387237049059	5.28404900105651	5.20170730034636	4.14090131011446	4.98759761952422	4.39282588022666
HORVU1Hr1G002320	5.98200825808555	3.69156669326013	2.67414824301339	2.52746213711284	2.06117521501554	2.97510018977412	3.12233729648628	1.87503353585461	1.94169123189061	3.42833773596641	2.6007428677075	2.12944892607929	1.84441892415579	2.45357624831434	1.63625393525221
HORVU1Hr1G002340	10.2890542039071	10.6216441674257	16.8995141543011	19.8827021452877	21.0697910868255	18.1074443204957	9.19192755507643	12.1752177594826	16.724651367125	13.2848087268698	11.2492449436555	15.3450365360218	11.735567468403	12.1069909957806	10.2155313254935
HORVU1Hr1G002390	15.8922019389806	16.4442516336133	18.9671545483836	22.0578513784393	18.3024725111102	17.8720047371323	12.022457627592	17.2753089770072	19.5311294501938	16.8845633496346	13.849987811363	16.6942293670491	16.6359353943463	14.6410123669905	16.1414239558664
HORVU1Hr1G002460	39.3616143382029	36.0766745023149	30.4632351394824	38.7391014833841	29.9061255734198	49.7847700821195	14.7362648105194	36.6256550670268	34.0530218567706	22.0699241752838	16.2443225149667	25.7484511367145	21.8798715512598	20.3325048118508	13.69441356621
HORVU1Hr1G002470	179.420367687513	153.988670654765	140.337645681027	136.283822023594	107.123856313724	131.953184675953	101.899082610562	115.4770653615	170.167208885606	138.247719202845	112.100273924757	127.165488158155	110.719383064763	111.396383929616	102.921846630009
HORVU1Hr1G002500	84.1668561912636	64.5185178890237	62.8976207879901	56.5691980142892	50.3842830337131	58.8598958408549	53.4882641538257	52.150932743903	60.551396315513	47.7396029733323	45.9877389623199	41.4998710555758	42.4578003325273	39.7398907104027	38.1202943834434
HORVU1Hr1G002510	10.0298338460568	9.27925627896751	10.8068671264046	11.7488694494882	13.1686194292659	10.9158352286676	11.8181925708126	9.87517662216764	13.7550059536452	14.8918420406041	10.1965633067262	9.5906478350136	10.3974596214664	13.474558085005	11.1294749650038
HORVU1Hr1G002590	22.8113914908329	25.5053698807064	19.9044848603677	18.3202710059816	16.6229964099864	19.3488530327756	14.0651081953868	18.8503371471251	19.9716812423034	15.7917806962953	13.3133265846931	17.9458901861949	13.9597197004732	14.4398995597516	13.591226381104
HORVU1Hr1G002600	40.139275411754	39.1809464943746	33.1373833824958	31.8613408799679	25.9937096560293	32.126801329863	19.3759996716532	30.3505428337	36.2068306181955	27.6409729962292	23.2209184616741	29.3408802410162	24.1221063218021	23.8318676578073	22.391619168001
HORVU1Hr1G002620	6.06176836819335	4.93327549008399	5.87209871919434	7.70493003010763	6.25986546782496	7.61968106157976	2.04265056779476	6.8251220705108	6.70617727989109	4.75681860865339	3.96303675079238	3.77123779275111	4.52063461802889	4.44459303997925	4.1127463777961
HORVU1Hr1G002710	0.0598200825808555	0.117458940240095	0.275685385877669	0.260405189884353	4.75215396795248	0.385264772776505	0.700337337529633	1.67502995869679	0.0163167330410975	0.0642813325493702	0.47473877743867	0.113787347195077	3.47184738664618	1.99101679166491	4.49601306533266
HORVU1Hr1G002740	1.95412269764128	3.55732790441431	3.69418417076076	5.94336551030171	7.6530672335299	5.52212840979657	4.72727702832502	3.7250666245645	5.75980676350743	4.60682883270486	5.61430206362254	7.11983686734908	11.7898150838193	11.2824284861012	16.3772803789658
HORVU1Hr1G002830	6.08170839572031	4.98361503590118	5.54127625614114	6.87776060341615	6.0308459994899	6.48529034173783	8.75421671912041	5.90010552615585	7.22831273720621	7.43520746487715	7.14172247799043	7.57498625612938	6.25655831135198	6.39538727019638	6.61872087322742
HORVU1Hr1G002840	87.3772006231029	80.5600531560995	77.2883979308044	86.5311128033359	86.0158953155094	96.4232111865641	108.58146803949	93.3766700855598	109.664762769217	128.948353094037	117.384322925814	102.262314457747	126.324613766199	108.279135417413	92.0724511674353
HORVU1Hr1G002850	2.13358294538385	2.73511532273364	2.21926735631523	1.96069790030572	2.02300530362636	2.71825700792312	2.68462646053026	1.82503264156516	1.9743246979728	1.41418931608614	1.48613878154714	1.41421417228167	1.69975861637886	1.62901373863493	1.17928211549709
HORVU1Hr1G002860	1.71484236731786	2.14782062153317	1.69546512314766	1.21011823534494	1.4695415884833	2.14035984875836	2.24691562457424	1.27502280438114	1.25638844416451	0.792803101442232	0.949477554877341	0.780256095051954	0.976457077494239	0.824562509679408	0.368525661092841
HORVU1Hr1G002890	34.4364275390458	35.4222604066915	28.9883183250369	18.7185377669812	26.0700494788076	29.6011767083281	29.9686019017889	23.8004256817812	21.4891374151255	19.7772233143562	17.9781510934383	11.6063094138978	15.6233132399078	12.8108858211167	9.28684665953959
HORVU1Hr1G002900	0.777661073551121	1.3256080398525	0.675429195400288	0.122543618769107	0.11450973416753	0.256843181851003	0.029180722397068	0.200003577157826	0.114217131287683	0.0214271108497901	0.020640816410377	0.0325106706271647	0	0.040222561447776	0
HORVU1Hr1G002920	0	0.100679091634367	0.0413528078816503	0.0459538570384153	0.190849556945883	0.128421590925502	0.029180722397068	0	0.13053386432878	0.257125330197481	0.144485714872639	0.34136204158523	0.216990461665387	0.140778965067216	0.191633343768277
HORVU1Hr1G002960	12.402697121764	18.004777553946	10.765514318523	7.04625807922367	4.69489910086872	3.21053977313754	3.70595174442764	4.32507735603798	7.21199600416512	7.49948879742652	8.21504493133004	9.769456523463	6.36505354218467	5.43004579544976	7.31154911608196
HORVU1Hr1G002970	3.66896506495914	3.03715259763674	3.79067405581794	3.17081613565065	2.99633804405036	3.25334697011271	4.69809630592795	3.42506125882776	4.48710158630182	4.92823549545171	4.60290205951407	3.85251446931902	4.64721238733369	5.6914924448603	7.17887987808854
HORVU1Hr1G002990	0	0	0.0137842692938834	0.0153179523461384	0.0954247784729415	0	0	0	0.0163167330410975	0	0	0.0162553353135824	1.15728246221539	1.08600915908995	2.2701180723319
HORVU1Hr1G003010	0.0997001376347591	0.285257426297374	0.124058423644951	0.336994951615045	0.477123892364707	0.321053977313754	0	0.0500008942894564	0.489501991232926	0.621386214643912	0.47473877743867	0.715234753797624	0.506311077219235	0.844673790403296	0.560159004861118
HORVU1Hr1G003020	2.01394278022213	1.61086546614988	1.76438646961708	1.21011823534494	1.297776987232	1.99053465934527	3.12233729648628	2.42504337303864	2.17012549446597	2.84980574302208	2.55946123488674	1.57676752541749	1.3923554623529	2.07146191456046	1.96055651701391
HORVU1Hr1G003030	1.89430261506042	1.49340652590978	1.69546512314766	1.16416437830652	1.25960707584283	1.86211306841977	2.88889151730974	2.37504247874918	2.03959163013719	2.78552441047271	2.51817960206599	1.44672484290883	1.37427292388078	2.0111280723888	1.85736933190792
HORVU1Hr1G003050	0.498500688173796	0.453055912354652	0.551370771755337	0.597400141499398	0.305359291113413	0.192632386388252	0.379349391161884	0.250004471447282	0.685302787726097	0.578531992944332	0.516020410259424	0.666468747856877	0.48822853874712	0.583227140992752	0.427489766867695
HORVU1Hr1G003060	0.159520220215615	0.201358183268734	0.151626962232718	0.122543618769107	0.305359291113413	0.192632386388252	0.700337337529633	0.375006707170923	0.456868525150731	0.899938655691183	0.825632656415079	0.34136204158523	0.524393615691351	0.663672263888304	0.692828242854541
HORVU1Hr1G003070	0.0797601101078073	0.0671193944229115	0.0413528078816503	0.0919077140768305	0.209934512640471	0.256843181851003	0.204265056779476	0.27500491859201	0.114217131287683	0.621386214643912	0.165126531283016	0.308851370958065	0.216990461665387	0.281557930134432	0.132669237993423
HORVU1Hr1G003080	0.43868060559294	0.520175306777564	0.330822463053202	0.628036046191675	1.06875751889694	1.28421590925502	1.13804817348565	0.82501475577603	1.28902191024671	2.27127375007775	1.44485714872639	1.07285213069644	1.01262215443847	1.24689940488106	1.25298724771566
HORVU1Hr1G003100	0	0	0	0	0.11450973416753	0	0	0	0.0163167330410975	0.0214271108497901	0.0412816328207539	0.0487660059407471	0.687136461940391	0.221224087962768	1.28246930060309
HORVU1Hr1G003130	1.57526217462919	1.20814909961241	0.978683119865724	1.30202594942177	1.12601238598071	1.19860151530468	0.962963839103245	1.22502191009168	2.12117529534268	1.92843997648111	2.22920817232071	2.11319359076571	2.11565700123752	2.1720183181799	2.22589499300076
HORVU1Hr1G003140	0.0199400275269518	0.0335596972114557	0.0413528078816503	0.0306359046922768	0.152679645556706	0.0428071969751672	0	0	0.0163167330410975	0	0.0412816328207539	0.0650213412543295	1.21153007763174	0.724006106059968	2.04900267567619
HORVU1Hr1G003150	8.17541128605025	6.84617823113697	4.47988752051212	2.26705694722849	1.45045663278871	1.00596912891643	2.53872284854492	1.40002504010478	2.88806174827427	4.3068492808078	3.44701634053295	3.78749312806469	1.98907923193271	2.53402137120989	2.63864373342474
HORVU1Hr1G003160	7.51739037766084	5.5373500398902	5.23802233167571	4.56474979914925	4.08418051864189	5.00844204609456	4.58137341633968	4.77508540464309	4.56868525150731	5.33535060159773	4.25200818053766	3.64119511024245	4.05048861775388	5.89260525209918	3.93585406047154
HORVU1Hr1G003170	28.8731598590262	24.9516348767173	24.715194843933	28.3994836497406	25.3639061181078	28.3383643975607	34.9001439868934	31.550564296647	25.095135417208	28.069515213225	24.3974449970656	24.9681950416625	26.5451664770656	30.4082564545187	28.3469938512613
HORVU1Hr1G003230	0.0598200825808555	0.151018637451551	0.096489885057184	0.0612718093845537	0.229019468335059	0.128421590925502	0	0.100001788578913	0.114217131287683	0.14998977594853	0.0619224492311309	0.162553353135824	0.235073000137502	0.060333842171664	0.0737051322185681
HORVU1Hr1G003260	0.518440715700747	1.10747000797804	2.56387408866232	1.77688247215206	2.40470441751812	1.28421590925502	0.466891558353089	0.875015650065487	1.20743824504122	0.921365766540973	1.19716735180186	2.01566157888421	1.41043800082501	0.925118913298848	1.5183257237025
HORVU1Hr1G003270	10.5881546168114	8.7926406694014	9.01491211819977	9.75753564449018	8.24470086006214	8.54003579654586	9.97980705979727	8.27514800490503	8.12573305446658	7.22093635637925	7.59582043901873	10.8423086541594	6.45546623454525	7.28028362204746	7.50318245985024
HORVU1Hr1G003280	0.21934030279647	0.721533490046298	0.551370771755337	0.857805331383752	0.820653094867297	0.620704356139924	0.379349391161884	0.350006260026195	0.522135457315121	1.04992843163971	0.928836738466964	1.85310822574839	1.32002530846443	0.884896351851072	1.12031800972224
HORVU1Hr1G003300	17.786504554041	23.7770454743164	27.5823228570608	35.8133725852716	47.4261149010519	31.1422357994341	22.29407191136	35.1256282383431	31.3607609049895	27.148149446684	31.6630123735183	39.4029328001237	86.9046798969873	53.5965631291615	90.6573126288388
HORVU1Hr1G003320	0.538380743227699	0.55373500398902	0.468665155992037	0.413584713345737	0.400784069586354	0.470879166726839	0.350168668764816	0.500008942894564	0.407918326027439	0.449969327845591	0.495379593849047	0.487660059407471	0.235073000137502	0.583227140992752	0.206374370211991
HORVU1Hr1G003340	0.478560660646844	0.838992430286393	0.716782003281939	0.796533521999198	0.89699291764565	0.599300757652341	0.846240949514973	0.525009390039292	0.652669321643902	0.771375990592442	0.804991840004702	0.520170730034636	0.578641231107697	0.5027820180972	0.663346189967113
HORVU1Hr1G003460	9.39175296519431	7.29923414349162	9.16653908043248	8.27169426691475	8.30195572714591	9.0109149632727	12.2267226843715	8.05014398060248	7.11409560591853	7.94945812527211	8.38017146261305	7.03856019078117	7.23301538884622	8.08473485100298	6.95776448143283
HORVU1Hr1G003490	0.159520220215615	0.419496215143197	0.248116847289902	0.306359046922768	0.229019468335059	0.406668371264088	0.0583614447941361	0.300005365736738	0.0815836652054877	0.214271108497901	0.0412816328207539	0.0650213412543295	0.0904126923605777	0	0.0442230793311409
HORVU1Hr1G003510	11.983956543698	10.974020988146	12.7090962889605	13.2193928747175	10.1722813852156	11.0656604180807	22.8485056369043	11.9002128408906	11.5848804591793	12.2777345169297	10.7125837169856	10.8423086541594	7.16068523495776	8.40651534258518	8.52031328446648
HORVU1Hr1G003520	15.8523218839267	14.5481287411661	18.8706646633264	19.2240301944037	13.8175079228819	13.9123390169293	37.4972282802324	13.425240116719	16.9041354305771	16.32745846754	11.3111673928866	15.3938025419625	9.20401208230681	10.960647994519	10.8051723832421
HORVU1Hr1G003530	18.8433260129695	19.4981840798558	20.814246633764	21.7361743791704	16.2031273847055	20.6758761390058	23.3153971952574	24.9004453561493	16.3656832402208	16.6274380194371	17.4621306831789	19.1487849994	19.1674907804425	19.5079423021714	20.7258831798614
HORVU1Hr1G003540	9.47151307530212	7.86974899608637	8.61516830867715	9.45117659756741	6.66064953741131	7.55547026611701	10.8552287317093	10.300184223628	7.68518126235694	7.99231234697169	7.20364492722156	8.22519966867268	8.20947246634046	7.98417844738354	8.80039278689704
HORVU1Hr1G003590	20.298948022437	17.9712178567345	15.7829883414965	16.9416552948291	10.6494052775803	14.4688325776065	15.9034937064021	10.4501869064964	13.4939382249877	19.498670873309	14.6962612841884	16.0115052838786	10.4517072368828	11.9662120307134	8.84461586622818
HORVU1Hr1G003620	42.9707593205812	42.1677595461941	44.9642864366478	23.5590107083609	32.6161892820514	60.550780121374	174.179731988099	95.0517000442566	48.5912309963885	81.0587603447558	66.4634288414139	38.3625913400544	29.7457757866301	49.8759761952422	49.4561437186592
HORVU1Hr1G003630	0.338980467958181	0.503395458171836	1.22679996715563	0.949713045460582	0.973332740424003	0.856143939503344	0.408530113558952	0.400007154315651	1.07690438071244	0.428542216995801	0.722428574363194	1.08910746601002	0.578641231107697	0.422336895201648	0.722310295741968
HORVU1Hr1G003700	6.24122861593592	4.84937624705535	4.71422009850814	5.422555130533	3.11084777821789	5.30809242492073	2.13019273498597	5.77510329043221	6.57564341556231	4.79967283035297	3.44701634053295	3.33234373928439	5.5875043878837	4.30381407491203	3.21354376472957
HORVU1Hr1G003710	0.119640165161711	0.134238788845823	0.096489885057184	0.1991333804998	0.229019468335059	0.171228787900669	0.116722889588272	0.0500008942894564	0.0979003982465853	0.214271108497901	0.185767347693393	0.211319359076571	0.16274284624904	0.181001526514992	0.147410264437136
HORVU1Hr1G003720	1.47556203699444	1.15780955379522	1.24058423644951	0.87312328372989	1.71764601251295	1.32702310623018	0.787879504720837	0.875015650065487	4.14445019243878	4.7353914978036	2.45625715283486	1.70681020792615	1.03070469291059	2.03123935311269	1.14980006260966
HORVU1Hr1G003740	2.65202366108459	2.38273850201336	2.92226509030329	4.05925737172668	3.33986724655295	3.98106931869055	2.77216862772146	2.80005008020956	2.30065935879475	3.14978529491914	3.05484082873579	2.19447026733362	1.77208877026732	2.25246344107546	1.50358469725879
HORVU1Hr1G003750	4.3868060559294	4.88293594426681	6.4923908374191	7.2147555550312	8.07293625881085	7.27722348577842	5.86532520181068	4.02507199030124	6.05350795824719	5.01394393885087	5.0157183877216	6.16077208384772	5.49709169552313	5.61104732196475	5.94063365681659
HORVU1Hr1G003810	0.199400275269518	0.100679091634367	0.0551370771755337	0.122543618769107	0.362614158197178	0.171228787900669	0.320987946367748	0.125002235723641	0.195800796493171	0.214271108497901	0.165126531283016	0.0812766765679118	0.235073000137502	0.40222561447776	0.280079502430559
HORVU1Hr1G003840	0.299100412904277	0.0838992430286393	0.110274154351067	0.168497475807523	0.362614158197178	0.256843181851003	0.496072280750157	0.150002682868369	0.310017927780853	0.192843997648111	0.144485714872639	0.146298017822241	0.126577769304809	0.160890245791104	0.191633343768277
HORVU1Hr1G003870	0.0797601101078073	0.0503395458171836	0.096489885057184	0.275723142230492	0.133594689862118	0.0856143939503344	0.29180722397068	0.150002682868369	0.0815836652054877	0.0642813325493702	0.185767347693393	0.113787347195077	0.180825384721155	0.040222561447776	0.147410264437136
HORVU1Hr1G003890	0.398800550539037	0.771873035863482	0.344606732347086	0.336994951615045	0.152679645556706	0.321053977313754	0.175084334382408	0.300005365736738	0.636352588602804	0.599959103794122	0.743069390773571	0.585192071288965	0.452063461802889	0.482670737373312	0.398007713980268
HORVU1Hr1G003910	0.0797601101078073	0.0671193944229115	0.275685385877669	0.260405189884353	0.209934512640471	0.192632386388252	0.0875421671912041	0.175003130013097	0.293701194739756	0.321406662746851	0.371534695386786	0.373872712212394	0.253155538609618	0.5027820180972	0.383266687536554
HORVU1Hr1G003940	4.10764567055208	3.9768241195575	4.10771224957726	3.46185723022728	4.50404954392284	3.87405132625263	3.61840957723644	2.77504963306483	5.2866215053156	5.33535060159773	5.34597145028764	4.74655791156605	26.5270839385935	28.1356817327193	43.6629203262798
HORVU1Hr1G003960	0.897301238712832	1.12424985658377	1.8333078160865	3.04827251688155	2.04209025932095	2.46141382607211	0.496072280750157	1.25002235723641	1.19112151200012	0.685667547193282	0.619224492311309	1.54425685479032	2.07949192429329	1.36756708922438	0.825497480847963
HORVU1Hr1G003990	0.358920495485133	0.604074549806203	0.702997733988055	0.628036046191675	0.477123892364707	0.385264772776505	0.466891558353089	0.200003577157826	0.73425298684939	0.985647099090343	0.784351023594325	0.780256095051954	0.705219000412506	0.522893298821088	0.515935925529977
HORVU1Hr1G004040	1.03688143140149	1.07391031076658	1.92979770114368	0.888441236076029	0.89699291764565	1.34842670471777	0.700337337529633	1.30002325152587	0.881103584219267	0.664240436343492	0.516020410259424	0.503915394721053	1.17536500068751	0.70389482533608	0.442230793311409
HORVU1Hr1G004080	4.84542668904929	4.37954048609497	7.80189642033802	5.14683198830251	5.17202299323343	5.56493560677174	2.62626501573612	3.95007064886705	3.83443226465792	2.24984663922796	2.18792653949996	3.70621645149678	5.15352346455293	3.27813875799374	2.72708989208702
HORVU1Hr1G004140	0.119640165161711	0.117458940240095	0.330822463053202	0.1991333804998	0.11450973416753	0.128421590925502	0.0583614447941361	0.200003577157826	0.146850597369878	0.0642813325493702	0.0619224492311309	0.0812766765679118	0.180825384721155	0.20111280723888	0.0442230793311409
HORVU1Hr1G004150	3.46956478968962	3.20495108369402	6.87835037764783	3.38526746849659	0	0.0642107954627508	0	0.125002235723641	0	0	0	32.656968644987	17.3592369332309	0.382114333753872	0.176892317324564
HORVU1Hr1G004200	1.37586189935968	2.0471415298988	1.37842692938834	1.45520547288315	1.56496636695624	1.41263750018052	1.22559034067686	0.750013414341846	1.84379083364402	2.48554485857565	2.51817960206599	4.03132315776843	1.93483161651636	1.64912501935882	1.26772827415937
HORVU1Hr1G004230	29.9698613730086	34.3986896417421	22.1926735631523	20.3728766203641	20.6880919729337	25.4274750032493	29.7351561226123	40.4257230330255	8.38680078312414	7.90660390357253	13.2720449518724	15.7189092482341	22.8020810133377	15.1236831043638	17.040626568933
HORVU1Hr1G004330	20.3188880499639	14.1286325260229	13.0950558291893	21.245999904094	22.7683521436438	26.6902873140168	34.5207945957315	37.525671164237	48.4117469329364	29.7622569703584	21.4664490667921	14.711078458792	47.3762507969427	78.9568881219843	67.1601164775593
HORVU1Hr1G004400	122.810629538496	98.162114343508	81.6717955662593	121.731767294762	99.5089589915833	137.903385055501	366.013801026424	208.253724715586	97.0682448614893	102.121610310099	124.753094384318	106.618744321787	63.4335449601813	93.9397922612808	47.4513641223142
HORVU1Hr1G004430	37.8062921911007	44.6176174426304	41.7111988832913	35.3691519672336	23.7989397511516	37.263664966883	45.6970112738085	42.950768194643	19.6127131153992	16.6702922411367	21.0742735549949	21.2294679195386	28.9139790169128	24.596096325315	33.6537633709982
HORVU1Hr1G004440	12.7815576447761	15.538139808904	14.2115816419938	10.952335927489	7.93934156894873	11.2154856074938	14.3277346969604	12.3752213366405	7.35884660153499	5.67818437519437	6.43993472003762	6.92477284358609	9.22209462077893	7.56184155218189	10.141826193275
HORVU1Hr1G004480	7.0787097720679	5.45345079686156	4.42475044333658	5.54509874930211	6.39346015768708	6.6565191296385	8.54995166234093	5.6751015018533	7.09777887287743	7.86374968187295	6.74954696619327	5.31549464754143	6.36505354218467	7.98417844738354	7.10517474586997
HORVU1Hr1G004490	16.4704627372622	14.8333861674634	10.9447098193434	11.8254592112189	11.2028689927233	11.7505755696834	13.306409413063	8.40015024062867	13.8529063518918	13.8633407198142	12.2812857641743	11.7363520964065	12.7481896228415	14.1382303488933	13.9744930686405
HORVU1Hr1G004510	6.65996919400191	5.55412988849592	6.42346949094968	7.67429412541535	6.10718582226825	7.34143428124118	6.82828904091392	6.20011089189259	9.87162348986402	11.4420771937879	9.90759187698095	11.8663947789151	8.39029785106161	7.64228667507744	7.72429785650594
HORVU1Hr1G004520	1.25622173419796	1.81222364941861	2.63279543513174	3.29335975441976	3.33986724655295	2.65404621246037	2.71380718292733	2.42504337303864	2.80647808306878	2.42126352602628	2.88971429745278	3.62493977492887	2.92937123248272	2.75524545917266	3.16932068539843
HORVU1Hr1G004530	0.319040440431229	0.620854398411931	0.799487619045239	0.827169426691475	1.01150265181318	1.02737272740401	0.787879504720837	1.20002146294695	0.99532071550695	0.599959103794122	0.928836738466964	1.41421417228167	0.578641231107697	0.945230194022736	0.913943639510245
HORVU1Hr1G004580	0	0	0	0.0153179523461384	9.23711855618073	0.149825189413085	1.95510840060356	1.72503085298625	0	0	0.103204082051885	0	2.35073000137502	13.0119986283555	9.77330053218214
HORVU1Hr1G004590	13.5791587458542	14.5816884383775	14.5148355664593	15.2413625844077	19.5048247198692	13.2702310623018	20.4848671227418	13.4502405638638	13.7713226866863	18.4273153308195	14.0357551590563	13.8820563577993	10.4336246984107	10.598644941489	9.68485437351985
HORVU1Hr1G004610	13.2999983604769	8.82620036661286	9.86953681442054	8.62400717087593	11.9853521762014	9.0109149632727	15.3198792584607	9.27516589069416	9.83899002378182	15.3846655901493	13.251404135462	8.14392299210477	6.36505354218467	7.11939337625635	5.46892081061776
HORVU1Hr1G004650	49.2917480466249	39.2816255860089	37.5759180951262	45.9691749907614	66.6064953741131	59.8658649697713	60.8418061978869	62.1261111546496	53.9594361669096	65.3741152027095	49.9714165295227	57.6739296925902	35.2609500206253	33.1433906329674	14.7262854172699
HORVU1Hr1G004670	0	0	0	0	3.64522653766636	0	0.408530113558952	0.650011625762933	0	0	0	0	0.795631692773084	4.88704121590478	3.18406171184214
HORVU1Hr1G004690	8.1554712585233	9.12823764151596	8.33948292279948	9.16013550299078	12.0807769546744	8.75407178142169	12.868698577107	8.9501600778127	8.15836652054877	12.3848700711787	8.73106534158946	8.32273168055417	6.4012186191289	6.23449702440528	5.88166955104174
HORVU1Hr1G004700	8.1554712585233	9.12823764151596	8.33948292279948	9.16013550299078	12.0807769546744	8.75407178142169	12.868698577107	8.9501600778127	8.15836652054877	12.3848700711787	8.73106534158946	8.32273168055417	6.4012186191289	6.23449702440528	5.88166955104174
HORVU1Hr1G004720	1.33598184430577	2.0471415298988	1.36464266009446	1.99133380499799	0.66797344931059	0.77052954555301	11.6722889588272	1.02501833293386	1.55008963890427	2.82837863217229	2.41497552001411	2.763407003309	0.452063461802889	2.45357624831434	0.751792348629395
HORVU1Hr1G004750	0.697900963443314	1.05713046216086	1.26815277503728	1.27139004472949	0.801568139172708	1.00596912891643	0.262626501573612	0.625011178618205	0.620035855561707	0.749948879742652	0.371534695386786	1.08910746601002	1.12111738527116	0.543004579544976	0.692828242854541
HORVU1Hr1G004860	0.0398800550539036	0.23491788048019	0.234332577996018	0.275723142230492	0.324444246808001	0.428071969751672	0.0583614447941361	0.150002682868369	0.13053386432878	0.12856266509874	0.247689796924524	0.2763407003309	0.253155538609618	0.321780491582208	0.176892317324564
HORVU1Hr1G004910	1.29610178925187	1.24170879682386	1.79195500820485	3.29335975441976	3.12993273391248	1.84070946993219	1.16722889588272	2.10003756015717	2.49646015528792	3.0212226298204	3.24060817642918	3.23481172740289	2.16990461665387	1.87034910732158	1.70995906747078
HORVU1Hr1G004920	0.179460247742566	0.201358183268734	0.151626962232718	0.336994951615045	0.11450973416753	0.23543958336342	0.175084334382408	0.125002235723641	0.522135457315121	0.299979551897061	0.577942859490555	0.243830029703736	0.289320615553849	0.30166921085832	0.16215129088085
HORVU1Hr1G004960	11.3059956077817	9.69875249411071	12.8331547126055	14.6899162999467	12.2143716445365	13.9123390169293	12.7811564099158	13.0752338566928	12.1233326495355	10.820690979144	10.4442531036507	11.1186493544903	8.91469146675296	11.3427623282728	9.83226463795699
HORVU1Hr1G004970	19.860267416844	15.7059382949613	12.6263906731972	15.5477216313305	17.2337149922132	16.7804212142655	21.5061924066391	19.1003416185723	18.4215916033991	26.226783680143	22.4778490709005	19.5551683822396	17.992125779755	18.0398188093275	18.4557651075295
HORVU1Hr1G004980	8.05577112088854	9.44705476502479	3.9147324794629	7.8121556965306	4.67581414517413	25.2348426168611	7.0325540976934	20.1753608457957	5.82507369567182	4.07115106146011	5.201485735415	3.18604572146214	14.9361767779674	22.1827426384485	22.8485909877561
HORVU1Hr1G005090	0.199400275269518	0.23491788048019	0.096489885057184	0.0919077140768305	0.0572548670837649	0.149825189413085	0.0583614447941361	0	0.228434262575366	0.235698219347691	0.227048980514147	0.0975320118814942	0.0904126923605777	0.060333842171664	0.0294820528874273
HORVU1Hr1G005100	0.0797601101078073	0.0167798486057279	0.0275685385877669	0.0459538570384153	29.0282176114688	0.0214035984875836	0.320987946367748	0.0500008942894564	0.93005378334256	3.89973417466179	17.4208490503582	2.90970502113124	76.7422932756584	4.34403663635981	6.75139011122084
HORVU1Hr1G005110	0.0797601101078073	0.0167798486057279	0.0275685385877669	0.0459538570384153	29.0282176114688	0.0214035984875836	0.320987946367748	0.0500008942894564	0.93005378334256	3.89973417466179	17.4208490503582	2.90970502113124	76.7422932756584	4.34403663635981	6.75139011122084
HORVU1Hr1G005120	28.6737595837567	19.9344601436047	24.6876263053452	22.1803949972084	27.6541008014584	22.2169352301118	56.3479749487384	47.3758473392599	17.8831394130429	20.5057450832491	25.6358939816882	17.9133795155678	37.3766070218628	32.6406086148702	53.6278542022302
HORVU1Hr1G005140	7.01888968948704	6.30922307575368	7.27809418717045	9.20608936002919	7.48130263227861	6.03581477349858	8.31650588316439	7.02512564766862	8.92525297348036	7.94945812527211	7.92607350158476	9.769456523463	7.28726300426256	8.7081845534435	8.66772354890361
HORVU1Hr1G005170	0.638080880862458	0.587294701200475	0.551370771755337	0.765897617306921	0.706143360699767	0.620704356139924	0.175084334382408	0.700012520052389	1.19112151200012	0.599959103794122	1.05268163692923	0.845277436306283	1.01262215443847	1.24689940488106	0.943425692397672
HORVU1Hr1G005180	2.47256341334203	3.28885032672266	2.39846285713572	2.35896466130532	2.02300530362636	1.54105909110602	0.525253003147225	1.10001967436804	5.40083863660329	3.10693107321956	3.57086123899522	2.87719435050408	4.35789177177985	2.97646954713542	3.53784634649127
HORVU1Hr1G005200	0.338980467958181	0.335596972114557	0.234332577996018	0.306359046922768	0.190849556945883	0.342457575801338	0.379349391161884	0.27500491859201	0.293701194739756	0.385687995296221	0.371534695386786	0.178808688449406	0.180825384721155	0.181001526514992	0.221115396655704
HORVU1Hr1G005230	0.179460247742566	0.385936517931741	0.137842692938834	0.107225666422969	1.31686194292659	0.149825189413085	0.0583614447941361	0.200003577157826	0.701619520767194	0.814230212292022	0.68114694154244	0.438894053466724	1.46468561624136	1.02567531691829	1.04661287750367
HORVU1Hr1G005260	25.662815427187	23.860944717345	20.7315410180007	23.3139234708227	25.5738406307483	21.5534236769967	24.015734532787	15.1002700754158	27.0857768482219	35.3333057913038	30.1975144083815	20.7580631954447	24.1763539372185	26.929004889286	25.2956013774126
HORVU1Hr1G005280	1.63508225721005	1.61086546614988	2.06764039408252	1.48584137757543	1.25960707584283	1.47684829564327	2.07183129019183	1.6000286172626	1.40323904153439	2.05700264157985	2.78651021540089	2.45455563235094	1.66359353943463	1.93068294949325	1.85736933190792
HORVU1Hr1G005290	2.87136396388106	2.88613396018519	1.28193704433116	0.597400141499398	0.992417696118591	1.26281231076743	1.63412045423581	1.05001878007858	0.881103584219267	0.599959103794122	0.557302043080178	0.487660059407471	0.705219000412506	0.5027820180972	0.48645387264255
HORVU1Hr1G005350	0.578260798281603	0.671193944229115	0.551370771755337	0.505492427422568	0.629803537921414	0.470879166726839	0.175084334382408	0.900016097210215	0.424235059068536	0.471396438695381	0.619224492311309	0.536426065348218	0.578641231107697	0.80445122895552	0.663346189967113
HORVU1Hr1G005360	1.73478239484481	3.77546593628877	2.1641302791397	1.21011823534494	0.0381699113891766	0.214035984875836	0	0.200003577157826	0	0.0214271108497901	0	0	0	0	0
HORVU1Hr1G005370	1.95412269764128	2.3491788048019	2.246835894903	1.74624656745978	0.801568139172708	1.26281231076743	0.700337337529633	0.9750174386444	1.43587250761658	1.75702308968278	1.44485714872639	1.21915014851868	0.669053923468275	1.10612043981384	0.781274401516822
HORVU1Hr1G005390	1.83448253247957	2.78545486855083	2.02628758620087	2.28237489957462	1.58405132265083	1.09158352286676	2.1885541797801	1.7750317472757	1.07690438071244	2.42126352602628	3.19932654360843	2.29200227921511	1.32002530846443	1.54856861573938	1.56254880303364
HORVU1Hr1G005450	3.2302844593662	3.4902085099914	3.21173474547484	3.15549818330452	2.63372388585318	3.01790738674929	3.44332524285403	2.77504963306483	3.3286135403839	2.84980574302208	3.11676327796692	3.15353505083498	2.07949192429329	2.43346496759045	2.24063601944447
HORVU1Hr1G005470	32.7215851717279	31.4118765899226	32.282758686275	24.018549278745	17.8826034858292	17.8720047371323	35.9506499931878	19.0003398299934	20.6080338309062	25.0268654725548	25.5946123488675	22.5461500799387	21.445890627929	20.5537288998135	23.9983910503658
HORVU1Hr1G005500	28.2749590332177	24.5824782073913	28.8918284399797	20.0971534781336	13.8938477456603	13.8909354184418	30.6397585169214	16.1252884083497	15.1745617282207	20.3343281964508	20.1660776329383	18.3847842396617	17.9740432412828	16.7124742815509	20.6374370211991
HORVU1Hr1G005510	0.777661073551121	4.06072336258614	0.206764039408252	0.122543618769107	0.0572548670837649	0.128421590925502	0	0.0250004471447282	0.277384461698658	0.12856266509874	0.020640816410377	0.113787347195077	0.307403154025964	0.221224087962768	0.250597449543132
HORVU1Hr1G005520	4.3469260008755	4.0942830597976	4.47988752051212	4.77920113199519	2.80548848710448	4.25931609902914	1.51739756464754	2.97505321022266	2.79016135002768	1.60703331373425	0.846273472825456	1.13787347195077	3.81541561761638	1.72957014225437	0.913943639510245
HORVU1Hr1G005600	47.3775054040375	36.0431148051035	30.270255369368	43.7633898529175	62.3123803428308	75.4904918657074	127.257130373614	110.776981298291	76.2644102340899	77.5447141653902	61.6747594342064	57.9502703929211	55.6580534171716	69.5850313046525	41.9677022852527
HORVU1Hr1G005680	0.757721046024169	0.654414095623387	0.606507848930871	0.398266760999599	1.27869203153742	0.556493560677174	1.28395178547099	1.22502191009168	1.37060557545219	1.56417909203467	1.23844898462262	1.26791615445942	1.33810784693655	1.78990398442603	1.9458154905702
HORVU1Hr1G005710	4.82548666152234	5.20175306777564	7.92595484398298	8.89973031310642	9.88600704979673	8.77547537990928	4.08530113558952	6.07510865616895	8.06046612230219	6.34242481153786	6.60506125132063	9.02171109903821	9.74648823647028	6.17416318223362	8.96254407777789
HORVU1Hr1G005720	0.757721046024169	1.09069015937231	2.59144262725009	2.29769285192076	2.30927963904518	1.92632386388252	1.34231323026513	1.32502369867059	2.38224302400024	1.32848087268698	1.94023674257544	2.66587499142751	2.42306015526348	1.70945886153048	2.46175141610018
HORVU1Hr1G005730	0.0398800550539036	0.0167798486057279	0.0275685385877669	0.0765897617306921	1.08784247459153	0.214035984875836	0.466891558353089	0.125002235723641	0.13053386432878	0.12856266509874	0.20640816410377	0.308851370958065	1.48276815471347	1.04578659764218	1.65099496169593
HORVU1Hr1G005760	0.0598200825808555	0.0167798486057279	0	0.0765897617306921	0.0381699113891766	0.0214035984875836	0.029180722397068	0.0250004471447282	0.0163167330410975	0	0.20640816410377	0.0975320118814942	3.79733307914426	0.824562509679408	0.692828242854541
HORVU1Hr1G005790	13.3598184430577	9.39671521920761	9.16653908043248	9.77285359683631	9.9432619168805	11.4509251908572	14.2985539745633	10.2001824350491	10.6711434088778	12.8776936207238	10.0314367754432	9.83447786471733	8.89660892828085	10.8399803101756	8.26971583492335
HORVU1Hr1G005800	9.37181293766736	7.98720793632646	6.83699756976618	9.71158178745176	9.00809908784567	10.5733776528663	12.022457627592	10.6001895893648	11.9601653191245	11.0135349767921	14.6343388349573	12.532863526772	8.31796769717315	12.6298842946017	7.29680808963825
HORVU1Hr1G005870	0.717840990970266	0.939671521920761	0.427312348110386	0.566764236807122	0.0572548670837649	0.214035984875836	0.320987946367748	0.375006707170923	0.0979003982465853	0.214271108497901	0.330253062566032	0.211319359076571	0.180825384721155	0.261446649410544	0.132669237993423
HORVU1Hr1G005920	0.0997001376347591	0.0671193944229115	0.234332577996018	0.0612718093845537	3.77882122752848	0.0428071969751672	0.641975892735497	2.05003666586771	0	0.0214271108497901	0.970118371287718	0.0975320118814942	13.923554623529	3.82114333753872	6.41234650301543
HORVU1Hr1G005980	4.42668611098331	5.99040595224485	7.41593688010929	6.6173554135318	4.75215396795248	5.24388162945798	3.29742163086869	2.95005276307793	7.63623106323365	7.41378035402736	6.77018778260365	11.9151607848559	9.22209462077893	9.69363730891402	8.29919788781077
HORVU1Hr1G006020	54.2568149008359	65.0051334985898	82.3885775695413	85.872440852452	102.314447478688	63.3974587202226	78.7587697496866	64.3011500562409	96.007657213818	76.6233483988493	89.1683268928285	100.084099525727	119.688322146933	93.1353410323253	164.583560244063
HORVU1Hr1G006230	0	0.0167798486057279	0.0551370771755337	0.0919077140768305	0.248104424029648	0.0642107954627508	0	0.0750013414341846	0.0979003982465853	0.0857084433991602	0.144485714872639	0.292596035644483	0.216990461665387	0.140778965067216	0.176892317324564
HORVU1Hr1G006290	0.777661073551121	1.09069015937231	0.868408965514656	1.10289256892197	1.69856105681836	1.34842670471777	0.700337337529633	0.650011625762933	1.33797210937	1.88558575478153	1.58934286359903	1.69055487261257	1.08495230832693	1.60890245791104	1.31195135349051
HORVU1Hr1G006750	0.478560660646844	0.453055912354652	0.551370771755337	0.842487379037613	0.858823006256473	0.577897159164757	0.29180722397068	0.600010731473477	0.636352588602804	0.814230212292022	0.577942859490555	0.520170730034636	0.506311077219235	0.261446649410544	0.589641057748545
HORVU1Hr1G006770	12.5422773144527	13.8433750997255	16.6927501148928	20.4954202391332	21.0888760425201	17.6365651537689	11.1762166780771	15.5252776768762	16.7409681001661	13.7562051655652	13.849987811363	17.3932087855331	17.0699163176771	16.3705825092448	16.834252198721
HORVU1Hr1G006860	78.3443681533937	84.3355190923883	90.7280604923408	100.087500629668	85.157072309253	85.0150931926821	102.453516336106	114.677051052868	54.6447389546357	56.4175828674972	71.4172247799043	77.7980348108052	71.6430174265218	66.1862248623154	63.7696803955052
HORVU1Hr1G006880	9.03283246970918	8.12144672517229	8.13271888339123	7.84279160122287	7.25228316394355	8.66845738747136	9.92144561500313	8.40015024062867	8.50101791441182	9.94217943430259	8.6072204431272	8.45277436306283	7.12452015801352	8.08473485100298	7.96015427960536
HORVU1Hr1G006890	5.62308776260041	6.24210368133077	6.03750995072094	6.20377070018606	5.26744777170637	6.46388674325025	7.70371071282596	6.07510865616895	7.14672907200073	8.95653233521224	6.85275104824516	8.17643366273193	5.6959996187164	6.57638879671138	5.86692852459802
HORVU1Hr1G006930	0.398800550539037	0.402716366537469	0.372175270934853	0.336994951615045	0.343529202502589	0.727722348577842	0.787879504720837	0.525009390039292	0.489501991232926	0.321406662746851	0.433457144617916	0.731490089111206	0.741384077356737	0.543004579544976	0.398007713980268
HORVU1Hr1G006940	4.3469260008755	4.12784275700906	5.19666952379406	6.15781684314765	7.78666192339202	6.784940720564	7.93715649200251	5.52509881898493	6.91829480942536	8.24943767716917	7.96735513440551	7.8350716211467	5.02694569524812	6.79761288467414	4.96772591153149
HORVU1Hr1G006950	14.2371796542436	20.5049749961995	29.5810419046739	50.2888375523724	68.4959059878774	57.6184871285751	13.2188672458718	25.4504551933333	49.2439003180324	30.7907582911483	25.5946123488675	34.1687148291501	28.8235663245522	21.1168447600824	15.2127392899125
HORVU1Hr1G007010	3.66896506495914	4.24530169724915	3.15659766829931	1.96069790030572	1.10692743028612	2.26878143968386	0.29180722397068	0.625011178618205	1.17480477895902	1.00707420994013	1.30037143385375	0.666468747856877	1.77208877026732	1.28712196632883	1.50358469725879
HORVU1Hr1G007300	0.259220357850374	0.251697729085918	0.0551370771755337	0.260405189884353	0.133594689862118	0.385264772776505	0.116722889588272	0.400007154315651	0.212117529534268	0.278552441047271	0.433457144617916	0.211319359076571	0.343568230970195	0.281557930134432	0.0884461586622818
HORVU1Hr1G007310	66.0214311417375	58.2428545104814	76.1167350408243	64.5958050436657	43.2083396925479	67.7423892132021	23.4613008072427	66.6761925349901	44.0714959440045	43.6684519118721	37.3598777027823	36.5419937849332	72.5290618116554	43.0783633105681	51.0481745745803
HORVU1Hr1G007360	2.31304319312641	1.79544380081288	1.5851909687966	2.28237489957462	1.73673096820753	2.09755265178319	2.01346984539769	1.87503353585461	2.6269940196167	3.12835818406935	2.20856735591034	1.69055487261257	1.10303484679905	2.11168447600824	1.40039751215279
HORVU1Hr1G007480	2.29310316559946	1.64442516336133	0.716782003281939	0.459538570384153	0.458038936670119	0.214035984875836	0.0583614447941361	0.525009390039292	0.717936253808292	0.428542216995801	0.288971429745278	1.26791615445942	0.216990461665387	0.563115860268864	0.412748740423982
HORVU1Hr1G007530	0.0598200825808555	0.218138031874462	0.39974380952262	0.382948808653461	0.381699113891766	0.29965037882617	0.0875421671912041	0.175003130013097	0.212117529534268	0.12856266509874	0.268330613334901	0.292596035644483	0.560558692635582	0.20111280723888	0.368525661092841
HORVU1Hr1G007580	33.1403257497939	34.0798725182333	34.529594581178	43.824661662302	44.0862476544989	43.5777265207202	33.3827464222458	39.000697545776	38.132205117045	36.126108892746	33.892220545839	40.053146212667	33.0910454039714	36.3209729873417	30.8087452673615
HORVU1Hr1G007600	20.8173887381377	19.4478445340386	18.6914691625059	22.13444114017	21.3560654222443	21.2109661011953	18.8507466685059	15.9752857254813	20.9343684917282	22.4341850597302	19.6706980390893	19.1650403347136	18.9866653957213	17.9392624057081	16.627877828509
HORVU1Hr1G007630	22.1733106099704	28.5593023269488	28.5196531690448	25.8720215126278	31.0512229150951	45.5896647785531	82.7273479956879	61.1010928217157	28.0484640976467	30.212226298204	23.1177143796222	30.8526264251793	20.3066907041858	26.7077808013233	10.9231005947918
HORVU1Hr1G007640	24.426533720516	31.2105184066538	30.6424306403029	27.6335860324337	33.3032476870566	47.7728318242866	85.8788660145712	63.2261308290176	30.9854760450442	34.7762009092093	26.6472939857967	34.9489709242021	23.7785380908319	30.4082564545187	14.6525802850513
HORVU1Hr1G007720	0.65802090838941	0.738313338652026	0.537586502461454	0.796533521999198	0.400784069586354	0.406668371264088	0.700337337529633	0.600010731473477	0.685302787726097	0.857084433991602	0.350893878976409	0.422638718153142	0.415898384858657	0.70389482533608	0.294820528874273
HORVU1Hr1G007730	4.40674608345635	4.11106290840333	4.31447628898552	5.0242883695334	5.59189201851437	5.50072481130899	4.90236136270743	3.77506751885396	6.41247608515134	5.87102837284248	5.59366124721216	5.33174998285502	4.28556161789138	5.3697119532781	4.17171048357096
HORVU1Hr1G007790	0.817541128605025	0.251697729085918	0.0275685385877669	0.137861571115246	0.0572548670837649	0.149825189413085	0.700337337529633	0.225004024302554	0.554768923397317	0.685667547193282	0.0412816328207539	0.2763407003309	0.253155538609618	0.442448175925536	0.339043608205413
HORVU1Hr1G007800	0.857421183658928	0.318817123508829	0.0689213464694172	0.260405189884353	0.496208848059296	0.171228787900669	0.758698782323769	0.0750013414341846	1.33797210937	1.82130442223216	0.557302043080178	0.747745424424789	0.253155538609618	0.482670737373312	0.191633343768277
HORVU1Hr1G007810	77.9854476579086	77.0866244947138	56.8876793758569	73.1279045004648	33.1314830858053	39.168585232278	36.7968909427028	32.9755897838965	42.2603385764426	47.461050532285	27.3697225601599	28.1379854278111	18.8600876264165	20.6140627419852	12.1760878425075
HORVU1Hr1G007830	0.239280330323422	0.385936517931741	0.192979770114368	0.306359046922768	3.11084777821789	0.128421590925502	0.0583614447941361	0.100001788578913	0.277384461698658	0.385687995296221	0.288971429745278	1.07285213069644	4.12281877164234	8.90929736068238	7.4589593805191
HORVU1Hr1G007840	0	0.0335596972114557	0	0.0306359046922768	0.66797344931059	0.23543958336342	2.21773490217717	0.750013414341846	0.0815836652054877	0.0642813325493702	0.288971429745278	0.422638718153142	1.97099669346059	0.965341474746624	1.93107446412649
HORVU1Hr1G007870	0.299100412904277	0.134238788845823	0.289469655171552	0.183815428153661	0.190849556945883	0.107017992437918	0.0875421671912041	0.200003577157826	0.114217131287683	0.492823549545171	0.392175511797163	0.162553353135824	0.0542476154163466	0.221224087962768	0.176892317324564
HORVU1Hr1G007880	0.358920495485133	0.218138031874462	0.096489885057184	0.306359046922768	0.248104424029648	0.727722348577842	0.175084334382408	0.55000983718402	0.293701194739756	0.257125330197481	0.144485714872639	0.243830029703736	0.415898384858657	0.281557930134432	0.309561555317986
HORVU1Hr1G007890	0.299100412904277	0.134238788845823	0.289469655171552	0.183815428153661	0.190849556945883	0.107017992437918	0.0875421671912041	0.200003577157826	0.114217131287683	0.492823549545171	0.392175511797163	0.162553353135824	0.0542476154163466	0.221224087962768	0.176892317324564
HORVU1Hr1G008120	133.817524733374	122.257976941333	107.255399375707	98.2340283957857	85.1379873535584	89.0175661098602	109.57361260099	81.5514585861034	81.1920636125014	157.939234073803	120.769416817116	97.5320118814942	57.900288187714	69.3436959359658	52.8908028800445
HORVU1Hr1G008130	40.956816540359	35.9759954106805	28.2991048603427	25.4124829422436	23.5699202828165	21.4678092830464	35.3962162676435	22.8754091374263	26.6941752552356	47.2467794237871	54.0582981787773	40.9959556608547	28.479998093582	30.9110384726159	27.4920143175259
HORVU1Hr1G008160	2.75172379871935	2.43307804783054	2.246835894903	2.09855947142096	1.96575043654259	2.14035984875836	2.68462646053026	1.7750317472757	1.79484063452073	1.69274175713341	1.5274204143679	1.90187423168914	1.53701577012982	1.76979270370214	1.50358469725879
HORVU1Hr1G008230	25.0646146013784	29.4821940002639	30.2151182921925	30.3601815500464	27.0624671749262	26.2408117457775	14.6195419209311	16.1502888554944	24.9809182859203	20.7414433025968	15.2329225108582	14.8736318119279	21.6267160126502	14.1583416296172	13.7681186984285
HORVU1Hr1G008250	26.7196368861154	25.2704520002262	26.2866015434357	31.7387972611988	31.3756671619031	31.9341689434747	26.2918308797583	25.0754484861624	26.1230895987972	20.8914330785453	21.6315755980751	22.1397666970992	27.7747790931695	25.9033295723677	27.7426117670691
HORVU1Hr1G008330	42.631778852623	44.0638824386414	47.9554728734205	50.0284323624881	47.7314741921653	45.2258036042642	38.6936378985122	42.0257516502881	41.8687369834563	43.2613368057261	40.51792261357	36.2493977492887	42.2227273323898	41.2281254839704	45.0633178384326
HORVU1Hr1G008350	3.29010454194705	3.96004427095178	4.02500663381396	4.27370870457262	6.0308459994899	5.37230322038348	5.77778303461947	4.20007512031434	5.23767130619231	3.32120218171746	4.70610614156595	4.63277056437097	4.14090131011446	4.24348023274037	3.67051558448469
HORVU1Hr1G008430	0.518440715700747	0.486615609566108	0.689213464694172	0.566764236807122	0.55346371514306	0.642107954627508	0.758698782323769	0.750013414341846	0.636352588602804	0.557104882094542	0.495379593849047	0.455149388780306	0.452063461802889	0.60333842171664	0.339043608205413
HORVU1Hr1G008440	1.89430261506042	1.49340652590978	1.06138873562902	1.27139004472949	0.973332740424003	1.36983030320535	2.33445779176544	1.27502280438114	1.24007171112341	1.45704353778572	1.13524490257073	1.39795883696808	1.01262215443847	1.36756708922438	1.32669237993423
HORVU1Hr1G008530	21.1962492611498	18.3907140718777	17.5749433497014	18.4274966724045	17.7871787073563	19.1776242448749	21.8271803530069	17.3503103184414	16.0230318463578	20.7842975242964	15.9140694524006	14.5322697703426	16.1657893940713	19.4677197407236	19.2812625883774
HORVU1Hr1G008560	4.9251867991571	4.42988003191216	6.97484026270502	9.66562793041335	10.0196017396589	6.61371193266333	6.04040953619308	6.00010731473477	9.26790436734341	7.30664479977841	7.32748982568383	10.4034146006927	7.99248200467507	7.92384460521187	9.05099023644017
HORVU1Hr1G008620	60.4581634617179	57.3703023829836	56.3914456812771	74.0776175459254	59.5832316785046	65.1311501977169	77.9125288001717	56.5760118885199	56.8964481143071	55.3248002141579	53.4597145028764	57.5926530160223	49.2568347980427	54.1395677087065	46.8469820381219
HORVU1Hr1G008690	0.478560660646844	0.285257426297374	0.303253924465436	0.367630856307322	0.496208848059296	0.577897159164757	0.29180722397068	0.200003577157826	0.244750995616463	0.449969327845591	0.144485714872639	0.113787347195077	0.361650769442311	0.160890245791104	0.3243025817617
HORVU1Hr1G008810	43.9079406143479	26.5289406456558	28.6299273233959	31.4018023095838	68.5722458106557	70.5034534181004	58.9742399644745	41.1007351059332	63.3578743985818	104.949988942272	64.3580655675554	31.9742445618165	22.3500175515348	34.0483982655424	11.733857049196
HORVU1Hr1G008830	2.55232352344983	8.80942051800713	14.3356400656388	10.6459768805662	0.55346371514306	0.428071969751672	0.204265056779476	2.25004024302554	18.4542250694813	15.4275198118488	10.5474571857026	18.3197628984073	0.741384077356737	0.543004579544976	1.2972103270468
HORVU1Hr1G008840	2.55232352344983	8.80942051800713	14.3356400656388	10.6153409758739	0.55346371514306	0.428071969751672	0.204265056779476	2.25004024302554	18.4542250694813	15.4275198118488	10.5474571857026	18.3197628984073	0.741384077356737	0.543004579544976	1.2972103270468
HORVU1Hr1G008900	0.717840990970266	1.15780955379522	1.59897523809048	1.05693871188355	0.66797344931059	0.920354734966095	0.612795170338429	0.950016991499671	1.25638844416451	1.26419954013761	0.639865308721686	0.780256095051954	0.379733307914426	0.221224087962768	0.250597449543132
HORVU1Hr1G008940	0.159520220215615	0.268477577691646	0.0827056157633006	0.1991333804998	0.190849556945883	0.0856143939503344	0	0	0.0163167330410975	0.0642813325493702	0	0.0487660059407471	0.0904126923605777	0.020111280723888	0.0294820528874273
HORVU1Hr1G009030	1.55532214710224	2.1646004701389	2.04007185549475	1.47052342522929	2.27110972765601	1.99053465934527	1.92592767820649	1.57502817011788	1.06058764767134	0.685667547193282	0.866914289235833	0.926554112874195	1.46468561624136	1.02567531691829	0.81075645440425
HORVU1Hr1G009040	0.0398800550539036	0.285257426297374	0.978683119865724	0.336994951615045	0.0572548670837649	0.107017992437918	0.029180722397068	0.0500008942894564	0.522135457315121	0.321406662746851	0.846273472825456	0.471404724093889	0.0180825384721155	0.060333842171664	0.132669237993423
HORVU1Hr1G009050	2.51244346839593	1.61086546614988	1.72303366173543	2.23642104253621	5.26744777170637	2.37579943212178	11.0886745108859	9.60017170357563	4.53605178542512	12.2991616277795	6.83211023183478	11.1836706957447	9.24017715925104	8.32607021968963	5.69003620727346
HORVU1Hr1G009070	1.91424264258738	2.1646004701389	1.65411231526601	0.321676999268907	0.458038936670119	0.492282765214423	0.175084334382408	0.0250004471447282	4.40551792109634	3.6640359553141	0.743069390773571	1.07285213069644	1.08495230832693	0.925118913298848	0.574900031304832
HORVU1Hr1G009080	0.0797601101078073	0.117458940240095	0.303253924465436	0.0306359046922768	0.190849556945883	0.0214035984875836	0	0	0.652669321643902	0.449969327845591	0.165126531283016	0.195064023762988	0.307403154025964	0.040222561447776	0.221115396655704
HORVU1Hr1G009100	1.21634167914406	1.42628713148687	1.44734827585776	2.20578513784393	2.97725308835577	1.49825189413085	2.9180722397068	3.27505857595939	4.51973505238402	4.69253727610402	4.97443675490085	6.29081476635638	5.22585361844139	5.10826530386755	7.28206706319453
HORVU1Hr1G009110	0.777661073551121	0.402716366537469	0.0689213464694172	0.0459538570384153	0.381699113891766	0.23543958336342	0.175084334382408	0.175003130013097	0.815836652054877	1.92843997648111	0.433457144617916	0.455149388780306	0.379733307914426	0.422336895201648	0.427489766867695
HORVU1Hr1G009170	0.319040440431229	0.822212581680665	0.675429195400288	0.321676999268907	0.572548670837649	0.214035984875836	0	0.175003130013097	0.244750995616463	0.214271108497901	0.165126531283016	0.34136204158523	0.65097138499616	0.261446649410544	0.456971819755123
HORVU1Hr1G009180	0.937181293766736	0.755093187257754	0.275685385877669	0.0765897617306921	0.0572548670837649	0	0.029180722397068	0.0750013414341846	0.277384461698658	0.278552441047271	0.0825632656415079	0.2763407003309	0.235073000137502	0.060333842171664	0.206374370211991
HORVU1Hr1G009200	0.498500688173796	0.318817123508829	0.468665155992037	0.1991333804998	0.610718582226825	0.620704356139924	0.350168668764816	0.325005812881467	0.358968126904146	0.664240436343492	0.928836738466964	0.682724083170459	0.614806308051928	0.844673790403296	1.00238979817253
HORVU1Hr1G009250	11.1265353600391	13.994393737177	8.16028742197899	3.04827251688155	3.33986724655295	1.90492026539494	1.69248189902995	1.52502727582842	4.24235059068536	3.10693107321956	2.37369388719335	4.76281324687963	5.20777107996928	3.25802747726986	4.15696945712724
HORVU1Hr1G009360	0.897301238712832	0.838992430286393	1.18544715927398	0.520810379768706	0.496208848059296	0.620704356139924	1.34231323026513	0.650011625762933	0.79951991901378	1.41418931608614	1.71318776206129	0.89404344224703	0.723301538884622	1.28712196632883	1.41513853859651
HORVU1Hr1G009390	3.76866520259389	5.03395458171836	4.9899054843858	3.99798556234213	3.79790618322307	6.48529034173783	5.95286736900188	5.80010373757694	1.55008963890427	2.42126352602628	2.93099593027353	2.24323627327437	5.00886315677601	3.88147717971038	4.65816435621351
HORVU1Hr1G009430	3.88830536775561	4.58089866936371	4.79692571427144	4.68729341791836	6.06901591087908	5.58633920525932	5.69024086742827	4.57508182748526	5.22135457315121	5.09965238225003	4.6648245087452	5.44553733005009	5.15352346455293	4.64570584721813	5.58684902216747
HORVU1Hr1G009490	1.89430261506042	9.26247643036178	0.0413528078816503	0.0153179523461384	0.286274335418824	0.0214035984875836	0.116722889588272	0	0	0.0214271108497901	0.0619224492311309	0	1.59126338554617	0.281557930134432	0.176892317324564
HORVU1Hr1G009550	0.87736121118588	0.520175306777564	0.358391001640969	0.1991333804998	0.11450973416753	0.128421590925502	0.437710835956021	0.100001788578913	0.195800796493171	0.278552441047271	0.227048980514147	0.0812766765679118	0.216990461665387	0.160890245791104	0.147410264437136
HORVU1Hr1G009560	0.119640165161711	0.46983576096038	0.551370771755337	0.628036046191675	1.24052212014824	0.470879166726839	0.29180722397068	0.750013414341846	1.17480477895902	1.37133509438656	1.77511021129242	1.83685289043481	1.3923554623529	1.10612043981384	1.44462059148394
HORVU1Hr1G009590	0	0	0.096489885057184	0.260405189884353	0.229019468335059	0.23543958336342	0	0.0250004471447282	0.0489501991232926	0.0428542216995801	0.227048980514147	0.308851370958065	0.253155538609618	0.10055640361944	0.309561555317986
HORVU1Hr1G009600	0.159520220215615	0.352376820720285	0.44109661740427	0.0306359046922768	0.133594689862118	0	0	0	0.897420317260365	0.728521768892862	0.20640816410377	0.308851370958065	0.379733307914426	0.080445122895552	0.176892317324564
HORVU1Hr1G009610	2.87136396388106	3.03715259763674	2.27440443349077	0.505492427422568	0.801568139172708	0.642107954627508	0.175084334382408	0.100001788578913	4.56868525150731	3.62118173361452	0.990759187698095	1.33293749571375	1.44660307776924	1.26701068560494	1.04661287750367
HORVU1Hr1G009800	0.917241266239784	5.87294701200475	0.0689213464694172	0	0.11450973416753	0	0	0	0	0.0214271108497901	0.020640816410377	0	1.22961261610386	0.10055640361944	0.0589641057748545
HORVU1Hr1G009900	10.8074949196079	12.9037035778047	13.7429164860018	17.3858759128671	16.1840424290109	18.2144623129336	8.78339744151748	11.225200767983	19.3516453867417	16.9702717930337	16.863547007278	20.3679351479187	16.6178528558742	17.4364803876109	15.596005977449
HORVU1Hr1G009920	13.5392786908003	19.296825896587	26.3417386206112	47.0873855120295	45.2313449961743	28.5524003824365	35.8339271035995	36.6006546198821	63.733159258527	73.6021257690289	117.611371906328	130.936725950906	81.2990929706315	53.7172308135048	56.6497646231915
HORVU1Hr1G009950	51.3854509369549	41.6140245422051	52.03561658441	52.4639867855241	41.3761839458674	43.4279013313071	40.765469188704	35.7506394169613	42.7172071015934	47.761030084182	42.6026450710181	49.7575813948756	31.2104614028714	35.9589699343117	32.8282658901502
HORVU1Hr1G009980	18.9829062056581	13.7091363108797	12.3920580952012	12.6679465902565	12.748750403985	14.3832181836562	14.7946262553135	14.2752553196398	13.6081553562754	14.6347167104066	12.0542367836602	10.0457972237939	10.2527993136895	13.2131114355944	9.64063129418871
HORVU1Hr1G010010	4.70584649636063	3.52376820720285	3.88716394087513	3.35463156380431	5.36287255017931	3.61720814440163	9.42537333425297	4.82508629893254	6.51037648339792	7.28521768892862	7.49261635696684	4.35642986404007	10.2166342367453	12.9516647861839	16.6721009078401
HORVU1Hr1G010020	4.64602641377977	5.30243215941001	5.58262906402279	6.05059117672468	11.7945026192556	7.32003068275359	9.60045766863538	9.25016544354943	7.9788824570967	9.38507455220805	9.88695106057057	9.20051978748762	20.4513510119627	18.5224895467008	31.1035657962358
HORVU1Hr1G010110	1.05682145892845	0.771873035863482	1.10274154351067	1.07225666422969	0.89699291764565	0.984565530428846	0.466891558353089	0.750013414341846	0.473185258191829	0.471396438695381	0.227048980514147	0.503915394721053	0.452063461802889	0.422336895201648	0.456971819755123
HORVU1Hr1G010120	5.4635675423848	22.9716127412415	0.206764039408252	0	0	0	0.0583614447941361	0	0.0326334660821951	0.17141688679832	0.0619224492311309	0.0325106706271647	0.0542476154163466	0.060333842171664	0.0294820528874273
HORVU1Hr1G010130	33.937926850872	43.6779459207096	40.5395359933112	48.251549890336	23.7416848840678	22.2597424270869	43.1291077028666	33.850605433962	42.0155875808262	58.3245957331285	65.4726696537158	81.5367619329292	26.6355791694262	34.651736687259	21.3007832111662
HORVU1Hr1G010190	0.478560660646844	0.956451370526488	0.206764039408252	0.474856522730291	0.496208848059296	0.321053977313754	0.641975892735497	0.500008942894564	0.326334660821951	0.214271108497901	0.47473877743867	0.422638718153142	2.47730777067983	1.76979270370214	3.15457965895472
HORVU1Hr1G010210	0.0797601101078073	0.268477577691646	0.0827056157633006	0.0153179523461384	6.43163006907625	0.0428071969751672	1.25477106307393	2.42504337303864	2.10485856230158	9.10652211116077	26.4615266381033	11.8501394436015	8.22755500481257	11.3829848897206	15.4338546865682
HORVU1Hr1G010220	1.43568198194053	1.91290274105298	1.19923142856786	1.68497475807523	0.744313272088943	0.877547537990928	1.16722889588272	0.400007154315651	1.50113943978097	1.52132487033509	1.36229388308488	1.44672484290883	0.922209462077893	0.844673790403296	0.899202613066531
HORVU1Hr1G010230	1.1166415415093	0.687973792834843	0.744350541869706	0.811851474345336	3.30169733516377	1.49825189413085	18.4130358325499	13.3002378809954	0.146850597369878	0.514250660394961	1.17652653539149	0.812766765679118	8.78811369744815	2.47368752903822	3.99481816624639
HORVU1Hr1G010250	1.43568198194053	0.184578334663007	0.744350541869706	0.0919077140768305	21.5278300234956	1.96913106085769	23.9865538103899	21.525384991611	0.13053386432878	0.0642813325493702	0.928836738466964	0.113787347195077	17.5762273948963	21.6196267781796	20.2246882807751
HORVU1Hr1G010280	0.0398800550539036	0.0167798486057279	0.096489885057184	0.0765897617306921	0.229019468335059	0.29965037882617	0.379349391161884	0.100001788578913	0.163167330410975	0	0.103204082051885	0.0812766765679118	0.180825384721155	0.30166921085832	0.206374370211991
HORVU1Hr1G010380	0.638080880862458	0.687973792834843	1.7506022003232	1.42456956819087	10.382215897856	1.47684829564327	6.12795170338429	6.62511849335297	1.81115736756183	2.78552441047271	10.1759224903158	6.38834677823787	46.3636286425043	38.1712108139394	70.211508951408
HORVU1Hr1G010390	0.0199400275269518	0.0671193944229115	0.0275685385877669	0.0153179523461384	0.190849556945883	0	0.379349391161884	0.100001788578913	0.0326334660821951	0.0642813325493702	0.123844898462262	0.227574694390153	0.361650769442311	0.20111280723888	0.781274401516822
HORVU1Hr1G010400	0.239280330323422	0.100679091634367	0.206764039408252	0.168497475807523	0.381699113891766	0.23543958336342	1.51739756464754	0.750013414341846	0.375284859945244	0.299979551897061	0.722428574363194	0.406383382839559	0.361650769442311	0.40222561447776	0.132669237993423
HORVU1Hr1G010500	0.338980467958181	0.486615609566108	0.510017963873687	0.58208218915326	0.496208848059296	0.577897159164757	1.57575900944167	0.55000983718402	0.522135457315121	0.814230212292022	0.577942859490555	0.585192071288965	0.524393615691351	0.382114333753872	0.280079502430559
HORVU1Hr1G010510	7.57721046024169	6.67837974507969	8.58759977008938	7.07689398391595	6.01176104379531	6.3996759477875	11.0011323436946	7.35013146055009	6.93461154246646	7.26379057807883	9.47413473236303	9.34681780530986	7.7935740814818	7.56184155218189	7.94541325316165
HORVU1Hr1G010520	1.57526217462919	1.6276453147556	0.813271888339123	0.536128332114845	0.458038936670119	0.663511553115092	0.612795170338429	0.250004471447282	1.79484063452073	1.62846042458404	1.15588571898111	0.926554112874195	0.614806308051928	0.543004579544976	0.353784634649127
HORVU1Hr1G010530	1.43568198194053	1.45984682869832	0.592723579636988	0.336994951615045	0.286274335418824	0.428071969751672	0.350168668764816	0.100001788578913	0.620035855561707	0.707094658043072	0.577942859490555	0.373872712212394	0.289320615553849	0.160890245791104	0.132669237993423
HORVU1Hr1G010660	0.0997001376347591	0.23491788048019	0.179195500820485	0.321676999268907	0.419869025280942	0.107017992437918	0.0583614447941361	0.0750013414341846	0.244750995616463	0.257125330197481	0.330253062566032	0.357617376898812	0.32548569249808	0.10055640361944	0.191633343768277
HORVU1Hr1G010670	0.87736121118588	0.956451370526488	1.15787862068621	1.54711318695998	2.27110972765601	2.14035984875836	8.72503599672334	7.55013503770792	0.603719122520609	0.771375990592442	1.98151837539619	1.2028948132051	2.07949192429329	1.87034910732158	2.53545654831874
HORVU1Hr1G010780	6.14152847830116	5.82260746618757	4.78314144497755	5.83613984387874	4.21777520850401	4.00247291717813	6.50730109454617	4.75008495749836	6.72249401293219	8.20658345546959	8.11184084927815	7.75379494457879	5.3524313877462	5.45015707617365	5.82270544526688
HORVU1Hr1G010800	20.27900799491	25.8074071556095	29.0572396715063	32.4893769261596	30.2496547759224	33.154174057267	17.9461442741968	35.225630026922	22.7128923932078	20.0129215337039	18.2258408903629	20.5467438363681	25.3336363994339	19.9101679166491	22.0967986391267
HORVU1Hr1G010810	0.757721046024169	0.805432733074938	1.02003592774737	1.21011823534494	3.14901768960707	1.75509507598186	3.58922885483937	2.40004292589391	0.766886452931585	0.857084433991602	2.55946123488674	2.32451294984228	8.91469146675296	3.98203358332982	9.15417742154616
HORVU1Hr1G010820	28.554119418595	32.4018876576605	44.0958774711331	38.0957474848463	39.4104335093248	48.5433613698396	39.6566017376155	53.0009479468238	34.78727484362	31.0693107321956	32.3648001314711	36.2006317433479	37.6116800220003	35.6371894427295	37.7075456430195
HORVU1Hr1G010890	1.15652159656321	2.80223471715655	2.61901116583785	2.7112775652665	1.83215574668048	2.05474545480803	0.962963839103245	1.32502369867059	1.64799003715085	1.30705376183719	1.69254694565091	2.55208764423243	1.44660307776924	1.58879117718715	1.87211035835163
HORVU1Hr1G010930	79.9196303280229	76.2308522158217	84.1391797698645	93.4395093114444	83.6302758536859	91.0723115646682	79.5758299768045	85.8015346007072	85.6791651988032	70.0023711462641	64.4199880167865	81.2279105619711	68.55090334779	69.8867005155108	71.346567987574
HORVU1Hr1G010940	44.6257816053182	42.0167409087426	47.2524751394324	52.8162996894853	40.6509556294731	45.3542251951896	45.2593004378525	47.4008477864047	43.5167270206072	35.8047022299992	30.7135348186409	42.5239571803315	35.8938388671494	36.3611955487895	40.0808509004574
HORVU1Hr1G010960	0.737781018497218	1.37594758566969	1.21301569786174	2.1138774237671	1.83215574668048	1.4340410986681	0.700337337529633	1.25002235723641	1.17480477895902	1.0713555424895	0.660506125132063	1.51174618416316	1.75400623179521	1.32734452777661	1.20876416838452
HORVU1Hr1G010970	1.05682145892845	2.1646004701389	2.3295415106663	2.29769285192076	1.75581592390212	1.64807708354394	0.612795170338429	1.57502817011788	1.55008963890427	0.814230212292022	1.73382857847167	2.14570426139287	1.71784115485098	1.54856861573938	1.57728982947736
HORVU1Hr1G010990	0.299100412904277	0.755093187257754	0.730566272575822	0.658671950883952	0.725228316394355	0.599300757652341	0.204265056779476	0.625011178618205	0.358968126904146	0.12856266509874	0.516020410259424	0.877788106933448	0.506311077219235	0.442448175925536	0.501194899086263
HORVU1Hr1G011020	0.957121321293688	1.66120501196706	2.0814246633764	1.93006199561344	1.4695415884833	1.75509507598186	0.729518059926701	1.37502459296005	1.51745617282207	0.878511544841392	1.11460408616036	1.69055487261257	1.55509830860194	1.56867989646326	1.42987956504022
HORVU1Hr1G011030	1.21634167914406	1.99680198408162	2.30197297207853	2.61936985118967	3.95058582877978	2.65404621246037	1.78002406622115	3.07505499880157	3.39388047254829	2.20699241752838	3.65342450463672	4.12885516964992	6.88944715787602	4.42448175925536	8.15178762337364
HORVU1Hr1G011080	0.139580192688663	0.167798486057279	0.110274154351067	0.1991333804998	0.152679645556706	0.128421590925502	0	0.150002682868369	0.163167330410975	0.0857084433991602	0.0825632656415079	0.2763407003309	0.126577769304809	0.20111280723888	0.206374370211991
HORVU1Hr1G011150	1.25622173419796	3.08749214345393	3.41849878488309	4.28902665691876	2.25202477196142	2.63264261397278	0.700337337529633	1.70003040584152	2.38224302400024	1.60703331373425	2.47689796924524	2.87719435050408	1.95291415498848	2.07146191456046	1.99003856990134
HORVU1Hr1G011160	1.37586189935968	3.12105184066538	3.37714597700144	4.13584713345737	2.67189379724236	3.01790738674929	0.933783116706177	2.35004203160445	2.23539242663036	2.05700264157985	2.18792653949996	2.97472636238557	2.49539030915194	2.21224087962768	2.55019757476246
HORVU1Hr1G011240	0.338980467958181	0.78865288446921	1.08895727421679	0.980348950152859	0.687058405005178	0.513686363702006	0.350168668764816	0.425007601460379	0.522135457315121	0.235698219347691	0.433457144617916	0.926554112874195	0.48822853874712	0.522893298821088	0.663346189967113
HORVU1Hr1G011250	1.99400275269518	3.13783168927111	3.74932124793629	3.87544194357302	2.40470441751812	2.41860662909695	1.19640961827979	2.45004382018336	2.46382668920573	1.69274175713341	2.47689796924524	3.0397477036399	1.95291415498848	2.39324240614267	2.25537704588819
HORVU1Hr1G011290	0.21934030279647	0.570514852594747	0.661644926106405	0.49017447507643	0.419869025280942	0.791933144040593	0.262626501573612	0.300005365736738	0.293701194739756	0.14998977594853	0.516020410259424	0.585192071288965	0.307403154025964	0.563115860268864	0.265338475986845
HORVU1Hr1G011300	3.19040440431229	4.07750321119187	5.47235490967172	5.79018598684032	4.21777520850401	3.70282253835196	1.80920478861822	4.15007422602488	4.09549999331548	2.87123285387187	3.24060817642918	4.48647254654873	2.92937123248272	3.62003053029984	3.75896174314698
HORVU1Hr1G011350	0.418740578065988	0.419496215143197	0.454880886698153	0.520810379768706	0.458038936670119	0.406668371264088	0.583614447941361	0.425007601460379	0.587402389479512	0.514250660394961	0.660506125132063	0.455149388780306	0.361650769442311	0.341891772306096	0.294820528874273
HORVU1Hr1G011370	22.771511435779	18.8941095300496	17.8919815434607	15.8540806782533	20.0010335679285	20.2264005707665	12.6936142427246	10.6001895893648	20.0043147083856	25.4554076895506	14.3247265888016	9.65566917626793	11.2835040066001	12.6499955753256	8.06334146471136
HORVU1Hr1G011380	0.0199400275269518	0.0167798486057279	0.0689213464694172	0.0306359046922768	0.248104424029648	0.256843181851003	1.02132528389738	0.0250004471447282	0.146850597369878	0.364260884446431	0.165126531283016	0.195064023762988	0.180825384721155	0.462559456649424	0.235856423099418
HORVU1Hr1G011390	2.91124401893497	1.7451042549957	2.02628758620087	3.20145204034293	5.34378759448472	4.13089450810364	5.89450592420774	4.22507556745906	4.16076692547987	4.58540172185507	3.96303675079238	5.29923931222785	3.85158069456061	6.11382934006195	4.64342332976979
HORVU1Hr1G011400	7.01888968948704	6.76227898810833	8.44975707715055	10.1098485484514	12.4815610242607	9.31056534209887	11.4388431796507	9.30016633783889	15.0929780630152	14.5275811561577	13.6642204636696	16.8567827201849	12.5854467765924	15.7069102453565	15.4485957130119
HORVU1Hr1G011420	2.21334305549165	2.38273850201336	2.99118643677271	3.00231865984313	3.51163184780425	2.4828174245597	3.29742163086869	2.62504695019646	5.35188843748	5.87102837284248	5.26340818464613	6.30707010166996	4.91845046441543	5.77193756775586	6.1617490534723
HORVU1Hr1G011430	21.2361293162037	19.1625871077412	14.7905209523369	16.6506142002525	16.5084866758189	16.6305960248525	17.6835177726232	13.7502459296005	13.9344900170973	13.777632276415	17.4002082339478	17.5395068033554	17.992125779755	22.2430764806201	20.7553652327488
HORVU1Hr1G011450	0	0	0	0	0	0	0.175084334382408	0.0250004471447282	0.0652669321643902	0.321406662746851	0.20640816410377	0.0325106706271647	0.126577769304809	0.221224087962768	0.265338475986845
HORVU1Hr1G011500	3.42968473463571	3.12105184066538	3.81824259440571	3.01763661218927	2.40470441751812	3.80984053078988	3.00561440689801	2.82505052735429	2.08854182926049	1.43561642693593	1.01140000410847	1.96689557294347	1.91674907804425	1.40778965067216	1.60677188236479
HORVU1Hr1G011520	65.6026905636715	56.7830076817831	49.3752526106905	89.7785187007173	130.617436773762	160.227338278051	274.999127869969	224.329012229646	94.343350443626	99.3575130104765	91.108563635404	90.6560050438489	96.3618475179037	111.879054666989	98.0867899564705
HORVU1Hr1G011530	65.6425706187254	56.8333472276003	49.4717424957476	89.855108462448	130.655606685151	160.291549073514	275.057489314763	224.379013123936	94.4086173757904	99.4003672321761	91.2117677174559	90.8023030616711	96.4160951333201	111.939388509161	98.1310130358016
HORVU1Hr1G011540	1.37586189935968	1.34238788845823	1.61275950738436	1.93006199561344	2.57646901876942	1.88351666690736	1.31313250786806	1.55002772297315	2.77384461698658	2.35698219347691	1.7957510277028	2.94221569175841	2.31456492443079	2.59435521338155	3.243025817617
HORVU1Hr1G011610	0.0398800550539036	0.100679091634367	0.137842692938834	0.107225666422969	0.286274335418824	0.0856143939503344	0.320987946367748	0.150002682868369	0.261067728657561	0.12856266509874	0.288971429745278	0.292596035644483	1.41043800082501	0.764228667507744	3.19880273828586
HORVU1Hr1G011720	3.2701645144201	3.3727495697513	3.44606732347086	5.0242883695334	6.25986546782496	5.45791761433382	3.23906018607455	3.87506930743287	6.57564341556231	7.3280719106282	5.32533063387726	4.17762117559067	4.84612031052697	5.97305037499474	2.96294631518644
HORVU1Hr1G011730	5.02488693679186	5.57090973710165	8.07758180621569	4.9017447507643	12.1571167774527	8.66845738747136	5.10662641948691	7.77513906201047	3.08386254476744	2.76409729962292	1.42421633231601	2.12944892607929	10.6506151600761	1.64912501935882	2.22589499300076
HORVU1Hr1G011780	4.18740578065988	3.02037274903102	2.31575724137242	2.42023647068987	2.06117521501554	2.11895625027078	4.23120474757487	2.02503621872298	2.69226095178109	2.93551418642124	3.50893878976409	2.84468367987691	1.59126338554617	1.83012654587381	1.8426283054642
HORVU1Hr1G011800	20.3587681050178	18.4242737690892	11.3306693595722	16.9569732471752	20.2682229476528	18.1930587144461	11.8181925708126	10.6251900365095	2.90437848131536	1.62846042458404	2.00215919180657	0.829022100992701	3.97815846386542	1.81001526514992	2.24063601944447
HORVU1Hr1G011840	0.817541128605025	0.906111824709305	1.22679996715563	1.82283632919047	1.62222123404	1.71228787900669	1.25477106307393	1.17502101580223	1.28902191024671	1.52132487033509	1.15588571898111	1.04034146006927	0.976457077494239	0.90500763257496	0.840238507291677
HORVU1Hr1G011890	2.13358294538385	2.26527956177326	3.21173474547484	3.93671375295757	3.01542299974495	2.71825700792312	1.48821684225047	1.80003219442043	2.31697609183585	1.56417909203467	2.84843266463202	3.65745044555603	2.80279346317791	2.95635826641154	3.36095402916671
HORVU1Hr1G011900	4.46656616603721	3.85936517931741	5.08639536944299	6.51012974710883	5.66823184129272	5.0940564400449	3.12233729648628	3.75006707170923	4.17708365852097	3.878307063812	4.76802859079708	5.33174998285502	4.15898384858658	4.28370279418814	4.8645387264255
HORVU1Hr1G011990	1.91424264258738	2.38273850201336	4.71422009850814	2.02196970969027	0.0572548670837649	0.149825189413085	0.0875421671912041	0.125002235723641	0.146850597369878	0.0642813325493702	0.103204082051885	23.0338101393462	11.8440626992357	0.181001526514992	0.132669237993423
HORVU1Hr1G012060	0	0	0.0137842692938834	0	0.0572548670837649	0.0642107954627508	0.029180722397068	0.0500008942894564	0.620035855561707	0.235698219347691	0.20640816410377	0.308851370958065	0.289320615553849	0.181001526514992	0.103187185105995
HORVU1Hr1G012080	0.279160385377326	0.318817123508829	0.620292118224755	0.352312903961184	0	0	0	0	0	0	0	3.5924291043017	1.77208877026732	0.020111280723888	0.0147410264437136
HORVU1Hr1G012110	36.5899505119566	36.4626110202467	33.5509114613123	42.8136768074569	46.2046777365982	51.0689859913745	85.1785286770416	70.4012591595546	38.3280059135381	40.2401141759057	46.1115838607822	51.106774225903	43.0002764866908	42.3342459237842	43.7218844320546
HORVU1Hr1G012140	4.08770564302512	15.2193226853952	3.55634147782193	0.566764236807122	0.973332740424003	0.0428071969751672	0	0	0.0815836652054877	0.385687995296221	0.412816328207539	42.621489192213	0.16274284624904	0.060333842171664	0.16215129088085
HORVU1Hr1G012150	33.3397260250634	33.2912196337641	30.6699991788906	39.3671375295757	43.1892547368533	48.0724822031128	77.8833480777746	66.0261809092272	34.2651393863048	36.5117968880423	42.9741797664049	46.977919056253	40.1974830235129	39.0762184465144	40.0071457682388
HORVU1Hr1G012180	2.25322311054556	2.51697729085918	3.87337967158125	2.03728766203641	1.50771149987247	2.65404621246037	0.700337337529633	2.32504158445972	1.64799003715085	1.30705376183719	0.846273472825456	1.2028948132051	1.98907923193271	1.1664542819855	0.796015427960536
HORVU1Hr1G012190	7.91619092819987	8.28924521122957	14.8043052216308	8.34828402864544	7.34770794241649	11.7505755696834	3.58922885483937	7.32513101340536	4.47078485326073	3.42833773596641	2.80715103181127	3.44613108647946	7.34151061967891	3.96192230260594	2.66812578631217
HORVU1Hr1G012240	3.17046437678534	3.9768241195575	1.94358197043756	2.03728766203641	4.04601060725272	2.93229299279895	4.55219269394261	4.47508003890635	3.58968126904146	4.11400528315969	5.201485735415	3.60868443961529	4.17706638705869	4.24348023274037	5.12987720241234
HORVU1Hr1G012270	2.7317837711924	1.94646243826443	1.92979770114368	1.7156106627675	2.88182830988283	3.29615416708787	2.8305300725156	2.02503621872298	1.84379083364402	2.63553463452418	2.45625715283486	2.17821493202004	2.62196807845675	2.43346496759045	2.06374370211991
HORVU1Hr1G012290	0.159520220215615	0.184578334663007	0.206764039408252	0.1991333804998	0.324444246808001	0.214035984875836	0.233445779176544	0.175003130013097	0.277384461698658	0.449969327845591	0.227048980514147	0.422638718153142	0.379733307914426	0.261446649410544	0.339043608205413
HORVU1Hr1G012340	0.0398800550539036	0.0838992430286393	0.137842692938834	0.245087237538215	0.248104424029648	0.107017992437918	0.0583614447941361	0.100001788578913	0.146850597369878	0.0214271108497901	0.0825632656415079	0.227574694390153	0.16274284624904	0.10055640361944	0.176892317324564
HORVU1Hr1G012420	3.13058432173144	3.52376820720285	4.10771224957726	3.3086777067659	2.91999822127201	2.95369659128654	2.1885541797801	2.50004471447282	2.75752788394549	3.08550396236977	2.97227756309428	4.50272788186232	3.20060930956445	2.79546802062043	2.29960012521933
HORVU1Hr1G012440	6.14152847830116	11.4774164463179	11.4547277832171	7.07689398391595	6.96600882852473	8.71126458444653	9.3086504446647	8.10014487489194	5.49873903484987	6.40670614408723	7.71966533748099	6.40460211355145	7.66699631217699	7.84339948231632	8.82987483978446
HORVU1Hr1G012460	1.13658156903625	0.78865288446921	0.785703349751356	1.1182105212681	1.69856105681836	1.71228787900669	1.57575900944167	1.70003040584152	1.37060557545219	1.64988753543383	1.94023674257544	2.40578962641019	2.2060696935981	2.81557930134432	2.96294631518644
HORVU1Hr1G012470	13.9580192688663	12.8533640319875	11.6477075533315	11.6875976401036	12.4624760685662	12.9705806834757	15.436602148049	13.7252454824558	19.3679621197828	24.4697605904603	19.71197967191	15.7351645835477	14.7011037778299	17.6174819141259	15.0063649197005
HORVU1Hr1G012520	0.578260798281603	0.167798486057279	0.248116847289902	0.168497475807523	0.190849556945883	0.256843181851003	0.496072280750157	0.250004471447282	0.114217131287683	0.214271108497901	0.185767347693393	0.113787347195077	0.180825384721155	0.221224087962768	0.117928211549709
HORVU1Hr1G012680	26.1812561428877	23.0890716814815	20.1388174383637	13.0202594942177	14.5045663278871	15.7744520853491	22.9652285264925	27.3754896234774	15.4519461899194	26.9981596707355	25.7184572473297	19.2138063406544	15.966881470878	13.997451383826	11.8075621814146
HORVU1Hr1G012690	110.766852912217	129.976707299968	79.1906270933603	49.4769860780271	45.1931750847851	38.3766520882374	46.6307943905147	38.1256818957105	58.6097050836224	71.9736653444448	50.755767553117	44.4908527532749	44.3203017951552	43.7420355744564	37.7959918016817
HORVU1Hr1G012720	0.0199400275269518	0.0335596972114557	0.0551370771755337	0.0459538570384153	0.0763398227783532	0.0428071969751672	0	0.0500008942894564	0.0652669321643902	0.0214271108497901	0.020640816410377	0.113787347195077	0.253155538609618	0.482670737373312	0.353784634649127
HORVU1Hr1G012730	6.38080880862458	6.25888352993649	5.41721783249619	6.05059117672468	5.93542122101696	4.90142405365664	5.31089147626638	5.17509255895874	8.90893624043926	9.98503365600217	10.3823306544196	11.8501394436015	10.5240373907712	11.3226510475489	12.2645340011697
HORVU1Hr1G012740	0.0398800550539036	0.0167798486057279	0.0689213464694172	0.137861571115246	0.0954247784729415	0.0214035984875836	0.29180722397068	0.100001788578913	0.244750995616463	0.12856266509874	0.185767347693393	0.325106706271647	0.108495230832693	0.120667684343328	0.235856423099418
HORVU1Hr1G013040	4.50644622109111	4.59767851796944	5.92723579636988	7.24539145972347	6.69881944880049	5.28668882643315	7.49944565604648	7.75013861486574	8.12573305446658	8.27086478801896	7.5338979897876	9.75320118814942	8.13714231245199	8.52718302692851	9.77330053218214
HORVU1Hr1G013160	14.8353804800522	11.4270769005007	12.2404311329685	12.9130338277947	12.8441751824579	14.2333929942431	19.9012526748004	15.8502834897577	13.9181732840562	13.1991002834707	13.1482000534101	12.5491188620856	11.9887230070126	13.29355655849	13.591226381104
HORVU1Hr1G013190	17.2680638383403	6.35956262157086	7.09889868634997	4.12052918111124	12.748750403985	11.51513598632	19.5219032836385	21.1253778372953	4.78080278104158	5.91388259454206	19.0308327303676	7.77005027989237	41.5355908704494	29.0004668038465	61.514303349617
HORVU1Hr1G013210	6.0019482856125	6.25888352993649	8.10515034480346	8.82314055137573	19.8292689666772	15.7744520853491	24.1908188671694	21.4253832030321	11.9275318530423	14.7418522646556	18.0607143590799	19.034997652205	39.6911719462936	37.4270934271556	56.5908005174166
HORVU1Hr1G013360	1.39580192688663	1.51018637451551	1.40599546797611	1.02630280719127	0.801568139172708	1.00596912891643	1.75084334382408	1.02501833293386	0.73425298684939	1.2856266509874	0.516020410259424	0.715234753797624	0.886044385133662	1.12623172053773	0.884461586622818
HORVU1Hr1G013450	0.937181293766736	1.76188410360143	1.28193704433116	0.903759188422167	0.55346371514306	0.83474034101576	0.0583614447941361	0.775013861486574	0.946370516383658	0.707094658043072	0.701787757952817	0.861532771619866	0.687136461940391	0.462559456649424	0.722310295741968
HORVU1Hr1G013470	0.139580192688663	0.100679091634367	0.317038193759319	0.0153179523461384	0.458038936670119	0.23543958336342	0.583614447941361	0.300005365736738	0.228434262575366	0.12856266509874	0.350893878976409	0.113787347195077	0.343568230970195	0.40222561447776	0.398007713980268
HORVU1Hr1G013480	1.35592187183272	1.42628713148687	0.454880886698153	0.229769285192076	0.209934512640471	0.149825189413085	0.408530113558952	0.225004024302554	0.228434262575366	0.321406662746851	0.0412816328207539	0.0650213412543295	0.0904126923605777	0.040222561447776	0.16215129088085
HORVU1Hr1G013490	2.51244346839593	2.31561910759045	3.40471451558921	4.5034779897647	5.42012741726307	4.15229810659122	2.85971079491267	3.95007064886705	4.76448604800048	3.49261906851578	3.61214287181597	5.16919662971919	4.538717156501	3.70047565319539	4.96772591153149
HORVU1Hr1G013540	0.0598200825808555	0.0671193944229115	0.0689213464694172	0.0765897617306921	0.0763398227783532	0.128421590925502	0.0875421671912041	0.150002682868369	0.179484063452073	0.235698219347691	0.0619224492311309	0.178808688449406	0.108495230832693	0.10055640361944	0.0884461586622818
HORVU1Hr1G013580	2.79160385377326	3.99360396816323	3.72175270934853	5.48382693991755	4.44679467683907	4.55896647785531	3.32660235326576	3.47506215311722	4.01391632811	3.6640359553141	3.65342450463672	4.64902589968456	4.7737901566385	4.46470432070314	4.68764640910093
HORVU1Hr1G013600	30.229081730859	34.3651299445307	37.4932124793629	43.0281281403028	43.3228494267154	41.1377162931357	18.5005779997411	38.0256801071316	44.1367628761689	34.3690858030633	30.2387960412023	42.930340563171	43.8501557948802	36.8438662861628	38.6509713354171
HORVU1Hr1G013660	0.0797601101078073	0.0671193944229115	0.303253924465436	0.0765897617306921	0.152679645556706	0.0856143939503344	0	0.0250004471447282	0.652669321643902	0.535677771244751	1.36229388308488	0.731490089111206	3.18252677109234	1.68934758080659	4.58445922399494
HORVU1Hr1G013700	1.29610178925187	0.922891673315033	1.11652581280456	0.980348950152859	1.35503185431577	0.791933144040593	0.846240949514973	0.650011625762933	1.38692230849329	1.15706398588866	0.990759187698095	0.975320118814942	1.82633638568367	2.39324240614267	2.25537704588819
HORVU1Hr1G013730	6.65996919400191	7.08109611161716	7.67783799669307	8.36360198099158	6.20261060074119	5.97160397803582	4.63973486113382	4.57508182748526	7.24462947024731	6.12815370303996	6.37801227080648	7.10358153203549	8.04672962009142	6.49594367381582	6.82509524343941
HORVU1Hr1G013740	166.16024938209	220.38653158763	204.503419244055	238.714969362221	233.714367435928	272.403597951477	497.589678314804	427.657648857721	184.852268622594	202.421916197967	218.008302926402	233.881764491823	170.898071099964	223.838554456873	155.326195637411
HORVU1Hr1G013750	3.98800550539036	3.43986896417421	3.50120440064639	2.20578513784393	2.4428743289073	1.62667348505635	3.35578307566282	1.85003308870989	3.05122907868524	3.74974439871326	3.36445307489145	2.73089633268184	2.35073000137502	3.11724851220264	2.87450015652416
HORVU1Hr1G013780	20.5980484353412	16.2596732989503	15.0524220689207	17.2173784370596	16.6039114542918	16.1597168581256	17.3333491038584	14.5502602382318	20.6080338309062	22.3056223946315	17.3795674175374	17.2144000970837	17.5038972410078	18.6230459503203	17.8661240497809
HORVU1Hr1G013810	3.29010454194705	4.84937624705535	7.2367413792888	9.49713045460582	7.27136811963814	5.62914640223449	2.1010120125889	4.75008495749836	5.38452190356219	5.07822527140024	4.62354287592444	7.15234753797624	4.99078061830389	3.39880644233707	5.49840286350518
HORVU1Hr1G013820	107.815728838229	113.096179602606	132.14978972046	118.469043445035	86.779293543293	88.974758912885	73.2436132166408	68.9012323308709	107.592537672997	121.44886429661	92.6153432333615	65.4927459784234	83.4870801257575	135.871812570587	102.862882524234
HORVU1Hr1G013840	74.2766025378955	75.3918597855353	91.0726672246878	74.5677920210018	54.2966989511037	52.7598702718936	50.8328184156925	44.2257909990242	75.1875058533775	82.6443665476403	62.3765471921592	41.841233097161	53.1264980310755	87.1622906573306	68.7963704128115
HORVU1Hr1G013870	2.91124401893497	1.77866395220715	3.12902912971154	2.35896466130532	1.75581592390212	1.81930587144461	1.02132528389738	1.17502101580223	2.74121115090439	3.29977507086767	2.31177143796222	1.04034146006927	1.32002530846443	1.78990398442603	1.28246930060309
HORVU1Hr1G013900	69.2517156011037	84.1341609091195	73.5390766828681	82.2114502417249	84.8135431067504	96.787072360853	99.9731549323551	130.227329176889	74.1758684048294	64.8812916531643	51.0447389828623	72.3362421454415	54.0848725700976	54.5015707617365	40.0366278211262
HORVU1Hr1G013950	2.65202366108459	2.14782062153317	2.45359993431125	2.15983128080552	2.46195928460189	2.14035984875836	1.10886745108859	1.20002146294695	2.52909362137012	3.06407685151998	1.8783142933443	1.7555762138669	1.66359353943463	1.99101679166491	1.57728982947736
HORVU1Hr1G013970	5.56326768001956	7.31601399209735	8.94599077173035	4.77920113199519	5.36287255017931	8.43301780410794	14.998891312093	13.1752356452718	2.59436055353451	2.50697196942544	3.90111430156125	3.85251446931902	3.7250029252558	3.41891772306096	2.60916168053731
HORVU1Hr1G013990	7.13852985464875	5.40311125104437	6.9059189162356	7.79683774418446	5.28653272740096	5.05124924306973	3.53086741004523	3.1000554459463	7.47306373282268	5.97816392709143	4.14880409848577	5.73813336569458	3.77925054067215	4.42448175925536	3.68525661092841
HORVU1Hr1G014000	2.13358294538385	2.85257426297374	3.72175270934853	4.53411389445697	3.16810264530166	3.76703333381471	2.1885541797801	1.40002504010478	3.10017927780853	3.70689017701368	2.24984898873109	2.74715166799542	2.22415223207021	2.31279728324712	1.56254880303364
HORVU1Hr1G014010	17.7466244989871	24.8173960878715	26.603639737195	27.3119090331648	21.7759344475252	24.2288734879446	10.2716142837679	13.9502495067583	29.5169700713455	30.8336125128479	30.6928940022306	52.6185204100661	28.5342457089983	29.1211344881898	21.2565601318351
HORVU1Hr1G014030	0.319040440431229	0.78865288446921	0.84084042692689	0.980348950152859	0.362614158197178	0.385264772776505	0.466891558353089	0.175003130013097	0.620035855561707	0.707094658043072	0.454097961028293	0.861532771619866	0.289320615553849	0.563115860268864	0.368525661092841
HORVU1Hr1G014040	0.43868060559294	0.654414095623387	0.785703349751356	0.58208218915326	0.343529202502589	0.192632386388252	0.437710835956021	0.100001788578913	0.391601592986341	0.685667547193282	0.433457144617916	0.61770274191613	0.144660307776924	0.20111280723888	0.250597449543132
HORVU1Hr1G014050	1.29610178925187	0.973231219132216	1.06138873562902	0.903759188422167	0.801568139172708	0.963161931941262	1.28395178547099	1.52502727582842	1.68062350323305	1.09278265333929	1.8783142933443	1.18663947789151	0.614806308051928	0.965341474746624	1.03187185105995
HORVU1Hr1G014060	0.717840990970266	1.67798486057279	2.10899320196417	2.06792356672869	1.24052212014824	1.34842670471777	0.671156615132565	1.20002146294695	1.63167330410975	1.13563687503887	1.42421633231601	2.50332163829168	1.42852053929713	0.925118913298848	1.28246930060309
HORVU1Hr1G014070	19.1623664534007	17.0986657292367	16.4446332676029	24.7997648483981	17.4245645491591	18.4499018962971	20.2222406211681	17.9003201556254	12.3354501790697	19.3272539865106	18.0607143590799	18.4335502456024	9.8911485442472	10.6589787836606	10.2302723519373
HORVU1Hr1G014080	13.8981991862854	9.6316330996878	8.89085369455482	11.0289256892197	9.73332740424003	12.0074187515344	14.590361198534	9.20016454925998	11.5196135270149	13.5205069462175	10.4855347364715	10.549712618515	8.08289469703565	10.1360854848396	8.01911838538021
HORVU1Hr1G014120	40.7175362100356	61.967980900953	83.8910629225746	94.7108993561739	107.791829763035	93.6835505801534	36.3008186619526	83.976501959142	77.45553174609	57.7460637401842	53.5422777685179	70.6131766022018	76.9231186603795	52.7720006194821	62.0597213280344
HORVU1Hr1G014140	6.34092875357068	6.07430519527349	3.68039990146688	5.00897041718726	8.28287077145132	11.4937323878324	19.5510840060356	13.8752481653241	6.80407767813768	8.24943767716917	7.63710207183948	6.42085744886504	5.76832977260486	5.77193756775586	3.93585406047154
HORVU1Hr1G014270	0.0199400275269518	0.0838992430286393	0.165411231526601	0.183815428153661	0.209934512640471	0.0856143939503344	0	0.200003577157826	0.146850597369878	0	0.0412816328207539	0.113787347195077	0.180825384721155	0.181001526514992	0.147410264437136
HORVU1Hr1G014370	15.4136412783338	13.994393737177	20.7177567487068	17.4931015792901	11.7372477521718	6.59230833417575	6.94501193050219	5.32509524182711	9.90425695594621	8.16372923377001	9.43285309954228	12.4190761795769	16.0753767017107	14.902459016401	26.1358398847043
HORVU1Hr1G014410	0.299100412904277	0.268477577691646	0.124058423644951	0.122543618769107	0.11450973416753	0.128421590925502	0.0583614447941361	0.175003130013097	0.0163167330410975	0.0428542216995801	0.0825632656415079	0.0812766765679118	0.198907923193271	0.10055640361944	0.221115396655704
HORVU1Hr1G014560	0.43868060559294	0.201358183268734	0.317038193759319	0.459538570384153	0.55346371514306	0.77052954555301	0.554433725544293	0.475008495749836	0.685302787726097	0.535677771244751	0.371534695386786	0.325106706271647	0.433980923330773	0.643560983164416	0.3243025817617
HORVU1Hr1G014570	0.279160385377326	0.134238788845823	0.0827056157633006	0.0153179523461384	0.515293803753884	0	0	0	0.0326334660821951	0.0214271108497901	0.619224492311309	0.0487660059407471	0.867961846661546	0.080445122895552	0.235856423099418
HORVU1Hr1G014580	0.21934030279647	0.23491788048019	0.110274154351067	0.275723142230492	0.648888493616002	0.0642107954627508	0.233445779176544	0.250004471447282	0.244750995616463	0.492823549545171	1.38293469949526	0.438894053466724	2.56772046304041	0.60333842171664	0.545417978417404
HORVU1Hr1G014610	28.0157386753673	24.1965416894596	25.6249566173293	23.4364670895918	18.6650866693073	20.1407861768162	16.5454695991376	14.6502620268107	22.5660417958379	22.755591722477	16.7603429252261	20.8555952073262	19.0409130111377	20.111280723888	19.354967720596
HORVU1Hr1G014710	15.333881168226	11.6452149323751	10.7103772413474	10.0638946914129	6.73698936018967	6.76353712207642	8.72503599672334	6.10010910331368	11.2259123322751	10.2421589861996	8.13248166568853	9.02171109903821	8.3722153125895	9.00985376430182	7.20836193097596
HORVU1Hr1G014730	109.371050985331	101.148927395328	93.1403076187704	126.81732747368	89.3939324734516	136.490747555321	68.3704325763304	126.802267918061	135.265716910699	110.071068435372	84.5447840169041	70.7432192847105	103.829935906887	143.252652596254	93.5170717589193
HORVU1Hr1G014800	8.33493150626586	7.36635353791453	7.70540653528084	8.17978655283792	6.75607431588425	8.24038541771969	10.738505842121	6.70011983478716	11.3238127305217	12.2777345169297	10.237844939547	10.0945632297346	6.25655831135198	8.28584765824186	6.486051635234
HORVU1Hr1G014910	0.199400275269518	0.285257426297374	0.248116847289902	0.183815428153661	0.267189379724236	0.23543958336342	0.029180722397068	0.100001788578913	0.0326334660821951	0.0214271108497901	0.371534695386786	0.373872712212394	0.216990461665387	0.10055640361944	0.265338475986845
HORVU1Hr1G014950	0.299100412904277	0.671193944229115	0.537586502461454	0.137861571115246	0.171764601251295	0.149825189413085	0.029180722397068	0.225004024302554	1.33797210937	1.4998977594853	0.990759187698095	0.991575454128524	0.741384077356737	0.864785071127184	0.619123110635972
HORVU1Hr1G014990	3.52938487227047	5.35277170522719	3.28065609194426	3.32399565911204	3.37803715794213	3.29615416708787	7.06173482009046	4.55008138034053	4.01391632811	5.05679816055045	5.30468981746688	3.72247178681036	1.60934592401828	2.25246344107546	1.47410264437136
HORVU1Hr1G015000	42.9308792655273	47.6883297374786	33.7714597700144	39.8266760999599	34.3910901616481	40.6240299294337	124.426600301098	56.9260181485461	33.4982529333733	32.6549169350801	44.3983960987209	40.6220829486423	31.8975978648118	38.6739928320366	27.5804604761882
HORVU1Hr1G015040	6.42068886367849	7.06431626301143	6.12021556648425	5.6216885110328	3.47346193641507	3.51019015196371	4.87318064031036	4.90008764036673	5.3355717044389	6.29957058983828	6.33673063798573	5.41302665942293	4.37597431025196	4.20325767129259	3.99481816624639
HORVU1Hr1G015050	3.72878514753999	7.61805126700045	3.44606732347086	2.38960056599759	0.286274335418824	0.856143939503344	1.25477106307393	2.77504963306483	0.244750995616463	0.385687995296221	1.83703266052355	2.77966233862258	0.216990461665387	0.362003053029984	0.383266687536554
HORVU1Hr1G015060	3.70884512001304	3.28885032672266	2.97740216747882	2.94104685045858	2.86274335418824	2.82527500036104	4.2020240251778	3.07505499880157	3.81811553161683	5.54962171009563	4.04560001643389	3.26732239803006	3.36335215581349	3.15747107365042	3.19880273828586
HORVU1Hr1G015090	2.07376286280299	3.65800699604867	5.25180660096959	0.735261712614644	0.362614158197178	0.363861174288921	0	0.150002682868369	0.0652669321643902	0.0214271108497901	0.020640816410377	0.0650213412543295	0.0723301538884622	0.020111280723888	0.0442230793311409
HORVU1Hr1G015130	1.25622173419796	1.37594758566969	2.26062016419688	2.48150828007442	3.2635274237746	2.31158863665903	1.13804817348565	2.52504516161755	2.88806174827427	2.09985686327943	2.91035511386315	3.18604572146214	5.33434884927409	4.80659609300923	7.32629014252567
HORVU1Hr1G015210	0.159520220215615	0.436276063748925	0.344606732347086	0.122543618769107	0.0572548670837649	0.128421590925502	0.175084334382408	0.125002235723641	1.56640637194536	0.385687995296221	0.412816328207539	0.487660059407471	0.669053923468275	0.442448175925536	0.442230793311409
HORVU1Hr1G015240	0.21934030279647	0.167798486057279	0.358391001640969	0.459538570384153	0.362614158197178	0.599300757652341	0.525253003147225	0.250004471447282	0.391601592986341	0.342833773596641	0.47473877743867	0.390128047525977	0.560558692635582	0.422336895201648	0.456971819755123
HORVU1Hr1G015260	0.0598200825808555	0.167798486057279	0.124058423644951	0.0306359046922768	0.305359291113413	0	0	0.100001788578913	0.0163167330410975	0.0642813325493702	0.846273472825456	0.698979418484042	3.59842515595099	3.13735979292653	4.40756690667038
HORVU1Hr1G015270	3.78860523012085	2.73511532273364	3.54255720852804	5.28469355941776	3.75973627183389	4.06668371264088	6.97419265289926	3.42506125882776	4.53605178542512	5.27106926904835	5.16020410259424	6.76221949045027	5.15352346455293	5.75182628703197	5.05617207019377
HORVU1Hr1G015310	5.00494690926491	5.55412988849592	6.58888072247628	7.03094012687754	8.13019112589461	7.91933144040593	5.83614447941361	6.30011268047151	7.88098205885011	7.09237369128051	7.18300411081119	7.02230485546758	5.85874246496544	6.97861441118914	5.55736696928004
HORVU1Hr1G015490	38.2848528517475	38.7614502792314	46.1083807880401	55.6960747305593	58.3236246026618	66.565191296385	62.184119428152	57.7510329043221	49.5865517118954	41.1829070532965	38.2267919920182	41.1097430080498	43.7416605640475	44.4660416805164	40.3756714293316
HORVU1Hr1G015500	47.1382250737141	53.9639931160208	43.5582909686717	56.1249773962512	26.470833548394	22.4737784119628	22.8485056369043	22.9754109260052	27.8689800341946	37.2188915460853	37.6488491325276	39.8743375242175	15.7318084707405	21.9414072697618	25.221896245194
HORVU1Hr1G015540	0.0398800550539036	0.0167798486057279	0.0137842692938834	0.0459538570384153	0.152679645556706	0.278246780338587	0.612795170338429	0.55000983718402	0.0815836652054877	0.0214271108497901	0.103204082051885	0	0.108495230832693	0.060333842171664	0.221115396655704
HORVU1Hr1G015550	46.4004440552169	37.2009243588987	34.8190642363496	24.6159494202444	12.0616919989798	15.4533981080354	14.7946262553135	16.4752946683759	16.3330497741386	19.9272130903048	16.2856041477874	16.2228246429552	13.5799863925588	15.8879117718715	15.1242931312502
HORVU1Hr1G015560	67.6963934540015	56.6991084387545	48.9892930704617	39.2905477678451	19.9819486122339	27.2467808746939	22.9360478040955	26.5504748677013	24.6872170911806	28.476630319371	24.9753878565561	25.0169610476033	22.856328628754	24.1536481493895	23.4529730719484
HORVU1Hr1G015590	56.0713574057885	62.0518801439817	55.0957243676521	54.8229514468294	50.1170936539889	45.1187856118262	45.2884811602496	46.5258321363392	49.2765337841146	56.3961557566474	53.3152287880037	43.4830219638328	54.1210376470418	53.4960067255421	65.7302369125191
HORVU1Hr1G015620	4.14752572560598	4.26208154585488	4.53502459768765	5.97400141499399	6.20261060074119	7.21301269031567	3.26824090847162	8.25014755776031	5.71085656438414	5.50676748839605	5.40789389951877	4.74655791156605	5.40667900316255	5.10826530386755	5.77848236593574
HORVU1Hr1G015660	54.5160352586863	41.7147036338395	44.7299538586517	55.2365361601752	55.7471555838924	63.8255306899743	22.6442405801248	47.1508433149574	45.2626174560046	37.9474133149782	32.9427429909617	27.4877720152678	56.0739518020303	46.9598404902785	43.5155100618426
HORVU1Hr1G015670	5.10464704689967	3.94326442234605	3.73553697864241	4.94769860780271	3.9124159173906	2.84667859884862	4.75645775072209	2.77504963306483	4.81343624712378	2.87123285387187	3.21996736001881	3.8687698046326	3.16444423262022	3.09713723147875	3.75896174314698
HORVU1Hr1G015690	0.179460247742566	0.201358183268734	0.137842692938834	0.306359046922768	0.190849556945883	0.171228787900669	0.116722889588272	0.175003130013097	0.0326334660821951	0.0428542216995801	0.123844898462262	0.308851370958065	0.16274284624904	0.181001526514992	0.117928211549709
HORVU1Hr1G015770	15.294001113172	13.0211625180448	15.0386377996268	15.379224155523	15.4397291569219	19.2418350403377	3.70595174442764	9.97517841074655	9.26790436734341	10.4778572055473	8.02927758363664	6.69719814919594	7.84782169689815	6.17416318223362	2.01952062278877
HORVU1Hr1G015810	5.5034475974387	5.10107397614127	6.63023353035793	6.20377070018606	6.08810086657366	6.59230833417575	2.88889151730974	4.40007869747216	5.82507369567182	6.4709874766366	3.75662858668861	4.66528123499814	3.90582830997696	3.47925156523262	2.24063601944447
HORVU1Hr1G015820	6.93912957937923	5.70514852594748	6.28562679801085	7.413888935531	6.3552902462979	7.17020549334051	8.25814443837025	7.12512743624754	8.72945217698719	8.29229189886875	8.6072204431272	9.63941384095434	5.91299008038178	7.8836220437641	6.79561319055198
HORVU1Hr1G015910	1.05682145892845	0.855772278892121	0.206764039408252	0.49017447507643	1.297776987232	0.963161931941262	0.758698782323769	1.57502817011788	0.407918326027439	0.728521768892862	0.784351023594325	0.422638718153142	0.759466615828853	0.241335368686656	0.456971819755123
HORVU1Hr1G015940	31.3856033274222	27.7538695938739	31.0008216419438	29.9312788843545	23.9134494853191	31.5917113676734	38.5185535641298	29.5755289722135	22.6965756601667	19.0915557671629	22.8081021334666	25.6996851307737	16.7263480867069	17.6577044755737	16.2446111409724
HORVU1Hr1G016050	0.618140853335507	0.771873035863482	0.44109661740427	0.643353998537814	0.89699291764565	0.470879166726839	0.0875421671912041	0.350006260026195	0.440551792109634	0.557104882094542	0.536661226669801	0.666468747856877	0.813714231245199	0.643560983164416	0.692828242854541
HORVU1Hr1G016060	0.618140853335507	0.771873035863482	0.44109661740427	0.643353998537814	0.89699291764565	0.470879166726839	0.0875421671912041	0.350006260026195	0.440551792109634	0.557104882094542	0.536661226669801	0.666468747856877	0.795631692773084	0.643560983164416	0.678087216410827
HORVU1Hr1G016080	3.15052434925839	1.49340652590978	1.21301569786174	1.53179523461384	4.04601060725272	3.10352178069962	10.9719516212976	3.37506036453831	7.37516333457609	6.14958081388975	4.56162042669331	4.50272788186232	3.63459023289522	3.98203358332982	2.47649244254389
HORVU1Hr1G016110	5.58320770754651	4.64801806378662	4.70043582921425	4.91706270311043	5.7064017526819	5.4793212128214	7.00337337529633	6.77512117622134	4.92765337841146	5.613903042645	5.03635920413198	3.93379114588693	5.15352346455293	5.10826530386755	5.98485673614773
HORVU1Hr1G016120	0.299100412904277	0.55373500398902	0.385959540228736	0.689307855576229	0.744313272088943	0.813336742528177	0.437710835956021	0.775013861486574	0.310017927780853	0.17141688679832	0.433457144617916	0.536426065348218	0.867961846661546	0.261446649410544	0.456971819755123
HORVU1Hr1G016130	22.352770857713	22.1494001595608	22.7302600656138	21.9506257120164	26.1845592129751	26.4976549276285	20.163879176374	27.5754932006352	18.1278904086594	18.7487219935663	15.9140694524006	17.6532941505505	20.5779287812675	18.7839361961114	21.0059626822919
HORVU1Hr1G016140	4.02788556044427	2.38273850201336	1.69546512314766	2.19046718549779	1.75581592390212	2.33299223514661	1.31313250786806	1.22502191009168	1.69694023627414	2.20699241752838	1.46549796513677	0.89404344224703	1.17536500068751	0.844673790403296	0.3243025817617
HORVU1Hr1G016170	13.5990987733811	13.6084572192453	12.7642333661361	14.4907829194469	19.6002494983422	19.7983286010148	15.4074214256519	16.7753000341126	11.0301115357819	14.6775709321062	12.9005102564856	9.96452054722599	10.3974596214664	10.2768644499068	10.5398339072552
HORVU1Hr1G016190	0.717840990970266	1.34238788845823	1.08895727421679	1.57774909165226	5.2101929046226	0.963161931941262	0.408530113558952	0.925016544354943	1.04427091463024	1.73559597883299	3.01355919591504	2.32451294984228	4.8822853874712	1.64912501935882	3.53784634649127
HORVU1Hr1G016200	2.81154388130021	3.69156669326013	2.39846285713572	3.78353422949619	44.6969662367258	2.4828174245597	3.96857824600125	5.40009658326129	4.43815138717853	7.28521768892862	21.6522164144854	14.4835037644019	46.5263714887533	13.7158934536916	33.5505761858922
HORVU1Hr1G016240	7.43763026755303	7.18177520325153	6.13399983577813	9.28267912175988	10.0768566067426	10.3165344710153	10.1840721165767	7.65013682628683	11.5522469930971	13.4133713919686	9.47413473236303	7.88383762708745	9.96347869813567	9.85452755470512	10.8199134096858
HORVU1Hr1G016280	3.07076423915058	2.09748107571598	2.09520893267028	2.80318527934333	2.02300530362636	2.63264261397278	1.4590361198534	2.30004113731499	2.6433107526578	1.90701286563132	1.8783142933443	1.70681020792615	1.88058400110002	2.57424393265766	1.65099496169593
HORVU1Hr1G016320	0.837481156131977	1.09069015937231	1.29572131362504	1.66965680572909	2.55738406307483	1.60526988656877	0.875421671912041	1.65002951155206	1.63167330410975	1.88558575478153	2.68330613334901	3.8687698046326	6.34697100371256	3.57980796885206	5.11513617596863
HORVU1Hr1G016360	17.5472242237176	15.168983139578	18.9395860097958	14.3069674912933	17.1001203023511	17.6579687522565	26.6711802709202	23.4754198688998	17.1815198922757	13.5847882787669	13.1069184205894	13.6057156574684	17.4315670871194	15.8879117718715	19.2370395090463
HORVU1Hr1G016370	3.94812545033646	4.59767851796944	4.19041786534056	8.08787883876109	9.38979820173744	7.53406666762943	6.71156615132565	6.05010820902422	6.59196014860341	5.8281741511429	6.60506125132063	7.6562629326973	9.02318669758566	8.2054025353463	10.1270851668313
HORVU1Hr1G016430	13.5193386632733	14.615248135589	19.4909567815512	19.0555327185962	20.6880919729337	20.5260509495927	17.1290840470789	17.2753089770072	18.6663425990156	15.4918011443982	14.3866490380328	15.7676752541749	17.3230718562867	15.6063538417371	15.2717033956873
HORVU1Hr1G016470	0.0997001376347591	0.0671193944229115	0.151626962232718	0.0612718093845537	0.190849556945883	0.0642107954627508	0	0.0500008942894564	0.0489501991232926	0.192843997648111	0.0619224492311309	0.0812766765679118	0.235073000137502	0.10055640361944	0.235856423099418
HORVU1Hr1G016480	44.28680113736	39.1977263429803	29.443199211735	31.9379306416986	18.4742371123615	22.3025496240621	19.288457504462	12.8002289381008	27.5263286403316	27.0838681141346	24.8721837745043	25.7321958014009	18.6973447801675	20.7146191456046	19.76771646102
HORVU1Hr1G016490	35.2938487227047	39.3487449804318	38.2927000984082	40.4547121461516	45.4221945531201	43.641937316183	35.6880234916142	35.1506286854878	46.5842728323335	44.396973680765	34.4288817725088	36.4119511024245	40.2878957158734	42.4750248888515	41.2453919895107
HORVU1Hr1G016540	5.24422723958833	8.52416309170976	13.9634647947039	16.9416552948291	23.4363255929544	18.9421846615115	9.62963839103245	15.450276335442	17.8015557478374	13.6919238330158	14.3247265888016	23.8790875756525	20.1077827809925	17.2957014225437	20.28365238655
HORVU1Hr1G016590	0.0398800550539036	0.0503395458171836	0.110274154351067	0.0919077140768305	0.248104424029648	0.149825189413085	0	0.150002682868369	0.146850597369878	0.14998977594853	0.371534695386786	0.292596035644483	0.216990461665387	0.080445122895552	0.280079502430559
HORVU1Hr1G016600	0.159520220215615	0.536955155383292	0.758134811163589	0.87312328372989	0.629803537921414	0.470879166726839	0.408530113558952	0.575010284328749	0.685302787726097	0.364260884446431	0.47473877743867	0.95906478350136	1.26577769304809	0.80445122895552	1.37091545926537
HORVU1Hr1G016630	21.0367290409342	24.2468812352768	28.7677700163347	29.9159609320083	33.5895220224754	28.9590687537006	14.0942889177839	19.0503407242829	36.6636991433462	29.2051520882639	23.2002776452637	23.4564488574994	20.6864240121002	21.4989590938363	15.4191136601245
HORVU1Hr1G016640	36.2709100715254	33.8449546377531	27.2515003940076	26.2549703212813	35.9369715729097	35.1019015196371	24.861975482302	21.1753787315848	37.7895537231819	49.6894700606631	35.2338736125135	24.1066622700427	20.9214970122377	25.9435521338155	15.5223008452305
HORVU1Hr1G016660	4.84542668904929	10.4706255299742	3.70796844005464	2.26705694722849	28.6274335418824	2.80387140187345	14.5319997537399	16.000286172626	14.8155936013166	20.3986095290001	41.8182940474237	31.681648526172	59.0756531884015	45.0291575407852	63.4748598666309
HORVU1Hr1G016710	7.87631087314597	8.50738324310403	10.3795547782942	11.2586949744117	10.6303203218857	10.4449560619408	8.22896371597318	10.6501904836542	11.6501473913436	9.85647099090343	8.75170615799984	9.10298777560613	7.2149328503741	7.92384460521187	7.07569269298254
HORVU1Hr1G016770	0	0.0167798486057279	0.0413528078816503	0	0.343529202502589	0.0214035984875836	0.029180722397068	0.225004024302554	0.114217131287683	0.12856266509874	0.227048980514147	0.113787347195077	1.75400623179521	2.47368752903822	2.9187232358553
HORVU1Hr1G016790	9.77061348820639	9.68197264550498	11.7855502462703	12.7139004472949	12.9586849166254	11.771979168171	14.7946262553135	13.9252490596136	12.1233326495355	11.9349007433331	12.6734612759715	13.8658010224858	15.6052307014357	15.9080230525954	17.7481958382312
HORVU1Hr1G016840	0.398800550539037	1.40950728288114	0.0689213464694172	0.0459538570384153	0.229019468335059	0.171228787900669	1.19640961827979	0.100001788578913	0.0652669321643902	0	0.020640816410377	0.0650213412543295	0.0723301538884622	0.040222561447776	0.0442230793311409
HORVU1Hr1G016980	4.12758569807903	6.7454991395026	4.52124032839377	1.33266185411404	18.6841716250019	0.984565530428846	20.0471562867857	19.0003398299934	6.51037648339792	19.2843997648111	89.6430656702672	86.3645965210631	34.9716294050715	35.7578571270729	66.9242600544599
HORVU1Hr1G017020	0.677960935916362	0.23491788048019	0.220548308702135	0.444220618038014	0.458038936670119	0.53508996218959	0.554433725544293	0.425007601460379	0.456868525150731	0.557104882094542	0.47473877743867	0.130042682508659	0.506311077219235	0.643560983164416	0.471712846198836
HORVU1Hr1G017050	145.602081001802	112.643123690251	98.3369771425644	70.937437314967	36.8721344019446	31.2920609888472	36.7093487755116	46.6508343720628	25.8783386031807	27.8338169938773	62.3971880085696	68.8088343823942	32.6389819421686	28.2563494170626	31.8700991713089
HORVU1Hr1G017100	0.239280330323422	0.385936517931741	0.427312348110386	0.29104109457663	0.152679645556706	0.214035984875836	0.116722889588272	0.175003130013097	0.228434262575366	0.192843997648111	0.20640816410377	0.243830029703736	0.415898384858657	0.080445122895552	0.16215129088085
HORVU1Hr1G017120	44.1671609721983	43.7954048609497	33.109814843908	41.9099176190347	25.1921415168565	47.0451094757088	23.4029393624486	71.9762873296725	25.1114521502491	24.9197299183058	21.6728572308958	27.2927079915048	32.4943216343916	38.3119897790066	32.9756761545874
HORVU1Hr1G017170	0.0997001376347591	0	0.0551370771755337	0.0306359046922768	0.839738050561885	0.0856143939503344	0.554433725544293	0.400007154315651	0.195800796493171	0.257125330197481	0.495379593849047	0.308851370958065	4.43022192566831	1.99101679166491	8.19601070270478
HORVU1Hr1G017210	6.36086878109763	5.40311125104437	6.5750964531824	7.91938136295356	9.02718404354026	9.1393365541982	8.11224082638491	6.85012251765553	7.91361552493231	7.79946834932358	7.2655673764527	7.60749692675655	5.17160600302505	7.26017234132357	3.92111303402783
HORVU1Hr1G017220	5.04482696431881	4.89971579287254	5.89966725778211	5.83613984387874	7.71032210061367	6.93476590997709	7.1200962648846	5.75010284328749	10.2305916167682	11.6992025239854	8.89619187287248	9.60690317032718	8.69770100508758	9.3919680980557	7.94541325316165
HORVU1Hr1G017230	1.55532214710224	1.29204834264105	1.37842692938834	1.57774909165226	1.88941061376424	1.49825189413085	3.6475902996335	1.80003219442043	2.48014342224683	2.65696174537397	1.73382857847167	2.06442758482496	1.60934592401828	2.0111280723888	2.10796678145105
HORVU1Hr1G017240	24.7655141884742	34.3483500959249	16.9960040393583	12.2084080198723	10.4203858092452	12.3070691303606	9.3086504446647	11.0501976379699	7.9462489910145	7.84232257102316	8.8755510564621	8.68034905745298	9.61991046716547	7.24006106059968	8.85935689267189
HORVU1Hr1G017260	0.997001376347591	0.889331976103577	0.937330311984074	1.21011823534494	0.78248318347812	0.663511553115092	0.817060227117905	0.450008048605108	0.587402389479512	0.749948879742652	0.743069390773571	0.698979418484042	0.795631692773084	0.643560983164416	0.633864137079686
HORVU1Hr1G017270	0.997001376347591	0.889331976103577	0.895977504102423	1.1182105212681	0.763398227783532	0.663511553115092	0.787879504720837	0.350006260026195	0.554768923397317	0.685667547193282	0.743069390773571	0.682724083170459	0.777549154300968	0.623449702440528	0.619123110635972
HORVU1Hr1G017320	2.01394278022213	1.6276453147556	2.02628758620087	1.99133380499799	1.71764601251295	2.26878143968386	2.45118068135371	1.6000286172626	2.33329282487695	2.35698219347691	1.77511021129242	1.41421417228167	1.68167607790675	1.48823477356771	1.6215129088085
HORVU1Hr1G017370	1.37586189935968	1.49340652590978	2.13656174055193	2.20578513784393	1.37411681001036	1.13439071984193	0.408530113558952	0.875015650065487	0.668986054684999	0.428542216995801	0.577942859490555	0.373872712212394	0.831796769717315	0.522893298821088	0.339043608205413
HORVU1Hr1G017380	57.8061398006333	101.21604678975	64.9376926434849	29.8546891226238	29.0091326557742	41.3945594749867	43.304192037249	43.6257802675507	26.8083923865233	29.9551009680065	36.3691185150842	50.1151987717744	36.5267277136734	36.4617519524089	38.9310508378477
HORVU1Hr1G017410	2.01394278022213	1.40950728288114	0.565155041049221	0.658671950883952	6.96600882852473	1.32702310623018	6.59484326173738	3.87506930743287	3.47546413775378	7.56377012997589	17.3795674175374	5.33174998285502	39.6550068693494	32.3389394040119	71.0664884851434
HORVU1Hr1G017460	170.168194915007	174.460085953753	258.579107683959	327.987995635516	211.38496927326	239.848724651862	125.068576193834	180.178222572056	230.000668947311	174.930932977686	148.510674072662	157.904327236139	174.171010563417	142.086198314269	108.213875123302
HORVU1Hr1G017480	101.59444024982	80.6607322477339	76.0202451557671	80.8328345305725	56.4532989445922	77.1599725477389	56.2604327815472	61.9511080246365	46.7148066966623	47.2896336454867	37.2773144371408	39.5817414885731	28.6246584013589	33.766840335408	20.9617396029608
HORVU1Hr1G017490	4.26716589076769	5.5373500398902	4.53502459768765	1.27139004472949	1.35503185431577	0.984565530428846	1.51739756464754	1.02501833293386	1.41955577457549	1.11420976418908	1.15588571898111	1.83685289043481	2.6762156938731	2.1720183181799	3.44940018782899
HORVU1Hr1G017500	6.83942944174448	8.50738324310403	6.93348745482337	1.93006199561344	2.38561946182354	1.81930587144461	2.1010120125889	2.20003934873608	1.9743246979728	1.32848087268698	2.3324122543726	2.66587499142751	4.41213938719619	3.70047565319539	5.42469773128662
HORVU1Hr1G017570	333.656480608485	339.842273811806	313.054539933387	261.661261976737	157.240949967713	184.434808167508	101.578094664194	94.7766951256646	163.412081406592	151.168267045269	116.393563738116	137.30881739383	96.398012594848	98.9072786000812	73.041786028601
HORVU1Hr1G017580	21.4155895639463	18.1054566455804	19.036075894853	11.2280590697195	5.11476812614966	7.06318750090259	8.78339744151748	6.6501189404977	9.07210357085023	10.0278878777017	6.77018778260365	7.18485820860341	5.53325677246736	5.6914924448603	2.68286681275588
HORVU1Hr1G017660	0.0598200825808555	0.0503395458171836	0.0413528078816503	0.0306359046922768	2.08026017071012	0.128421590925502	0.204265056779476	0.27500491859201	0.0979003982465853	0.0857084433991602	0.20640816410377	0.260085365017318	0.452063461802889	0.422336895201648	0.442230793311409
HORVU1Hr1G017700	69.7701563168044	85.7282465266637	40.4568303775479	15.5783575360228	6.90875396144096	11.5579431832951	7.55780710084062	19.3003451957302	10.4263924132613	8.87082389181309	5.18084491900462	20.5142331657409	21.1023223969588	31.4942656136086	34.1254762171971
HORVU1Hr1G017710	27.1981975467623	23.2400903189331	21.6275185221031	19.5303892413265	14.9053503974735	16.4379636384642	17.8002406622115	11.9252132880353	16.5778007697551	19.0058473237638	13.5197347487969	15.5238452244712	13.9054720850569	15.4655748766699	12.3972032391632
HORVU1Hr1G017720	11.5452759381051	11.0243605339632	11.7855502462703	14.5367367764854	15.2297946442815	14.597254168532	14.4152768641516	13.9502495067583	13.9834402162206	14.0561847174623	13.7261429129007	13.4594176396462	12.1153007763174	10.8198690294517	11.3948134409906
HORVU1Hr1G017730	8.01589106583463	7.06431626301143	6.89213464694172	9.42054069287513	8.9699291764565	9.41758333453678	7.79125288001716	8.32514889919449	7.9462489910145	7.22093635637925	7.6164612554291	6.94102817889967	6.34697100371256	5.49037963762142	5.99959776259145
HORVU1Hr1G017740	3.78860523012085	5.16819337056418	6.56131218388852	7.58238641133852	8.3210406828405	5.95020037954824	8.69585527432627	5.72510239614276	10.1000577524394	10.3921487621482	9.96951432621208	13.0042682508659	7.4500058505116	9.67352602819013	7.81274401516822
HORVU1Hr1G017750	3.11064429420448	4.63123821518089	6.03750995072094	6.89307855576229	7.63398227783532	5.45791761433382	7.32436132166408	5.00008942894564	9.07210357085023	9.0636678894612	8.68978370876871	11.8826501142287	6.60012654232217	8.84896351851072	7.04621064009511
HORVU1Hr1G017770	1.33598184430577	1.39272743427541	1.32328985221281	2.83382118403561	1.83215574668048	2.24737784119628	3.4725059652511	2.27504069017027	1.37060557545219	1.11420976418908	1.259089801033	1.78808688449406	1.68167607790675	1.56867989646326	1.2972103270468
HORVU1Hr1G017800	0.319040440431229	0.369156669326013	0.165411231526601	0.107225666422969	0	0.0428071969751672	0.029180722397068	0.0750013414341846	0.0326334660821951	0.0214271108497901	0.123844898462262	0.162553353135824	0.0361650769442311	0.040222561447776	0.0884461586622818
HORVU1Hr1G017830	2.99100412904277	1.81222364941861	1.48870108373941	1.3939336634986	1.35503185431577	1.19860151530468	3.12233729648628	2.35004203160445	1.55008963890427	1.97129419818069	1.85767347693393	2.14570426139287	1.57318084707405	2.1720183181799	1.70995906747078
HORVU1Hr1G017850	0.358920495485133	0.251697729085918	0.261901116583785	0.0306359046922768	0.229019468335059	0.214035984875836	0.233445779176544	0.500008942894564	0.277384461698658	0.342833773596641	0.454097961028293	0.260085365017318	0.307403154025964	0.261446649410544	0.633864137079686
HORVU1Hr1G017860	0.558320770754651	0.755093187257754	0.813271888339123	0.520810379768706	0.610718582226825	0.513686363702006	1.31313250786806	0.82501475577603	1.14217131287683	1.0713555424895	1.27973061744337	1.1053628013236	1.06686976985482	1.04578659764218	1.60677188236479
HORVU1Hr1G017870	35.3736088328125	42.4362371238858	43.875329162431	22.1038052354777	21.8141043589144	23.6081691318047	14.7362648105194	32.8755879953176	32.5029322178663	21.1699855195926	34.5527266709711	20.6442758482496	13.308748315477	20.3123935311269	18.5736933190792
HORVU1Hr1G017900	0.757721046024169	1.86256319523579	2.21926735631523	1.14884642596038	3.05359291113413	0.642107954627508	0.729518059926701	2.37504247874918	0.407918326027439	0.578531992944332	2.02280000821694	0.747745424424789	5.22585361844139	5.20882170748699	8.34342096714191
HORVU1Hr1G017970	0	0.0335596972114557	0.0137842692938834	0.0153179523461384	0.610718582226825	0.0856143939503344	1.22559034067686	2.47504426732809	0.0326334660821951	0.0857084433991602	0.639865308721686	0.0650213412543295	19.2398209343309	18.9649377226264	27.4625322646385
HORVU1Hr1G018010	14.5163400396209	12.5513267570844	8.02244472904016	10.7991564040276	5.03842830337131	5.88598958408549	5.16498786428104	3.57506394169613	5.59663943309646	5.74246570774374	3.07548164514617	2.34076828515586	2.6762156938731	2.77535673989654	2.06374370211991
HORVU1Hr1G018020	0.378860523012085	0.46983576096038	0.537586502461454	0.459538570384153	0.496208848059296	0.256843181851003	0.350168668764816	0.225004024302554	0.668986054684999	0.321406662746851	0.288971429745278	0.536426065348218	0.524393615691351	0.30166921085832	0.574900031304832
HORVU1Hr1G018040	0.0398800550539036	0.0671193944229115	0.0413528078816503	0.229769285192076	0.190849556945883	0.192632386388252	0	0.250004471447282	0.114217131287683	0.10713555424895	0.165126531283016	0.146298017822241	0.144660307776924	0.160890245791104	0.147410264437136
HORVU1Hr1G018060	32.681705116674	27.133015195462	25.4319768472149	24.5087237538215	20.9552813526579	25.085017427448	25.7082164318169	20.3003630815193	28.0321473646056	30.512205850101	22.9113062155184	19.538913046926	22.3681000900069	24.77709785183	21.6987909251465
HORVU1Hr1G018080	4.00794553291732	2.39951835061908	4.05257517240173	5.00897041718726	3.14901768960707	2.7396606064107	3.41414452045696	2.27504069017027	4.47078485326073	3.68546306616389	4.12816328207539	4.35642986404007	3.58034261747888	3.8613658989865	4.40756690667038
HORVU1Hr1G018140	1.23628170667101	1.42628713148687	1.15787862068621	0.995666902498997	0.534378759448472	0.470879166726839	1.72166262142701	0.325005812881467	0.717936253808292	1.17849109673845	0.598583675900932	0.536426065348218	0.415898384858657	0.261446649410544	0.221115396655704
HORVU1Hr1G018150	2.53238349592288	5.65480898013029	8.4084042692689	8.30233017160703	4.84757874642543	3.63861174288921	3.6475902996335	2.70004829163065	5.41715536964439	5.07822527140024	5.38725308310839	5.47804800067726	4.14090131011446	3.23791619654597	3.18406171184214
HORVU1Hr1G018190	3.29010454194705	2.85257426297374	3.54255720852804	3.7069444677655	4.80940883503625	5.20107443248282	9.19192755507643	5.95010642044531	4.82975298016487	4.90680838460192	3.55022042258484	4.45396187592157	4.33980923330773	5.14848786531533	4.59920025043865
HORVU1Hr1G018200	0.0199400275269518	0.100679091634367	0.110274154351067	0.0919077140768305	0.133594689862118	0.128421590925502	0.408530113558952	0.400007154315651	0.0326334660821951	0.0214271108497901	0.309612246155655	0.113787347195077	0.16274284624904	0.140778965067216	0.0884461586622818
HORVU1Hr1G018260	13.2002982228421	12.2492894821813	12.653959211785	12.0552284964109	10.0005167839643	11.771979168171	6.65320470653151	8.32514889919449	8.27258365183646	8.65655278331518	6.89403268106591	6.22579342510205	4.26747907941927	4.48481560142702	3.92111303402783
HORVU1Hr1G018310	18.1653650770531	18.0886767969746	16.320574843958	16.0991679157915	18.2070477326372	17.165685987042	11.2637588452683	14.6002611325213	14.3750418092069	16.9488446821839	14.4072898544431	12.6629062092807	14.9000117010232	13.6957821729677	15.2127392899125
HORVU1Hr1G018340	1.99400275269518	2.03036168129307	1.29572131362504	1.82283632919047	1.54588141126165	2.20457064422111	1.80920478861822	1.72503085298625	1.45218924065768	1.4998977594853	1.8783142933443	1.86936356106197	2.22415223207021	1.91057166876936	1.99003856990134
HORVU1Hr1G018350	9.01289244218222	8.27246536262384	4.8244942528592	7.59770436368466	3.33986724655295	4.40914128844222	6.71156615132565	3.05005455165684	3.45914740471268	6.8995296936324	4.56162042669331	5.39677132410935	2.15182207818175	3.43902900378485	1.68047701458335
HORVU1Hr1G018360	3.32998459700095	2.9532533546081	1.59897523809048	1.05693871188355	1.08784247459153	0.941758333453678	0.817060227117905	0.200003577157826	2.95332868043866	2.57125330197481	1.77511021129242	0.926554112874195	0.958374539022124	1.08600915908995	0.221115396655704
HORVU1Hr1G018370	3.60914498237828	3.69156669326013	1.69546512314766	2.77254937465105	1.1450973416753	2.18316704573353	0.817060227117905	0.375006707170923	1.24007171112341	1.54275198118488	1.17652653539149	1.7555762138669	0.886044385133662	1.3474558085005	0.722310295741968
HORVU1Hr1G018380	0.239280330323422	0.285257426297374	0.565155041049221	0.352312903961184	0.190849556945883	0.214035984875836	0.233445779176544	0.200003577157826	0.163167330410975	0.385687995296221	0.185767347693393	0.422638718153142	0.16274284624904	0.241335368686656	0.3243025817617
HORVU1Hr1G018420	0.458620633119892	0.486615609566108	0.661644926106405	0.934395093114444	0.610718582226825	0.663511553115092	0.496072280750157	0.500008942894564	0.668986054684999	1.15706398588866	0.392175511797163	0.829022100992701	0.669053923468275	0.462559456649424	0.515935925529977
HORVU1Hr1G018450	0	0	0	0	0.229019468335059	0	0	0.0250004471447282	0	0	0.330253062566032	0.178808688449406	2.24223477054233	1.81001526514992	3.00716939451758
HORVU1Hr1G018480	38.9628137876639	25.4214706376777	14.5148355664593	29.1960171717398	20.8789415298796	21.8530740558229	20.6599514571242	20.6503693415455	18.8458266624677	32.1406662746851	27.5348490914429	17.8321028389999	11.6451547760424	13.4946693657288	6.91354140210169
HORVU1Hr1G018500	19.8403273893171	18.4578334663007	22.0410466009196	21.245999904094	16.2412972960946	18.7923594720984	35.5713006020259	28.6005115335691	14.9298107326043	14.6561438212564	16.0379143508629	19.6852110647482	14.2128752390828	15.3851297537743	13.6796725397662
HORVU1Hr1G018540	166.917970428114	163.888781332144	196.798012708774	153.424610698922	84.6036085941099	124.18367842496	92.5612514434998	123.877215602128	73.5884660153499	72.2950720071917	92.0786820066917	85.2429783844259	100.050685366215	67.5336806708159	59.3473724623911
HORVU1Hr1G018600	5.4635675423848	4.96683518729545	4.12149651887115	1.94537994795958	2.08026017071012	2.20457064422111	1.51739756464754	1.25002235723641	3.05122907868524	2.95694129727103	2.82779184822165	1.90187423168914	2.42306015526348	2.23235216035157	2.24063601944447
HORVU1Hr1G018610	5.24422723958833	4.66479791239235	3.68039990146688	1.83815428153661	1.96575043654259	2.11895625027078	1.42985539745633	1.10001967436804	2.57804382049341	2.76409729962292	2.58010205129712	1.69055487261257	2.16990461665387	2.0111280723888	2.00477959634505
HORVU1Hr1G018700	90.2884446420379	60.4410146778318	50.2436615762051	52.6478022136778	37.0057290918067	45.0973820133386	38.6936378985122	52.7259430282318	62.8357389412666	48.3395620771264	36.3484776986739	30.1861576773225	31.7529375570349	30.6697031039292	29.7768734163015
HORVU1Hr1G018710	88.9125827426782	58.947608151922	48.244942528592	50.242883695334	34.1429857376185	42.8500041721424	35.5421198796289	49.6508880294302	60.4861293833486	46.7111016525423	34.7591348350748	27.7478573802851	29.3479599402435	28.0954591712715	27.0792655771019
HORVU1Hr1G018720	70.5478173903556	54.5345079686156	85.9035662394816	64.626440948358	61.3772175137959	114.787498688911	78.2335167465394	120.802160603327	23.5124123122216	22.3270495054812	25.6152531652778	20.5792545069953	49.8535585676225	30.3881451737948	35.2752762798067
HORVU1Hr1G018740	32.5022448689315	31.2776378010767	37.3278012478363	41.2206097634585	50.4415379007969	46.5100195135192	33.5870114790253	38.0006796599869	37.5937529266887	33.9619706969172	30.1975144083815	31.9742445618165	50.396034721786	40.8460111502165	48.3505667353807
HORVU1Hr1G018750	16.570162874897	14.4474496495317	15.1902647618595	15.6549472977535	17.1764601251295	18.4499018962971	19.4635418388444	16.000286172626	19.3842788528239	19.6915148709571	18.6386572185704	15.8326965954292	17.6485575487848	18.2409316165664	14.8589546552633
HORVU1Hr1G018770	0.578260798281603	0.453055912354652	0.744350541869706	0.58208218915326	0.496208848059296	0.963161931941262	1.13804817348565	0.600010731473477	0.897420317260365	0.942792877390763	0.825632656415079	0.471404724093889	0.524393615691351	0.643560983164416	0.206374370211991
HORVU1Hr1G018780	12.0637166538059	10.1182487092539	11.3031008209844	10.6766127852585	7.53855749936237	7.17020549334051	5.25253003147225	6.55011715191879	10.2795418158915	7.60662435167547	9.63926126364605	10.4521806066335	7.86590423537026	7.62217539435355	6.57449779389628
HORVU1Hr1G018790	12.1833568189676	11.2089388686262	11.826903054152	12.499449114449	14.695415884833	15.3463801155974	14.998891312093	12.9752320681139	14.6687430039467	11.8063380782343	11.7652653539149	14.8411211413007	14.863846624079	13.3538904006616	15.2422213427999
HORVU1Hr1G018840	0.378860523012085	0.721533490046298	0.468665155992037	0.459538570384153	0.324444246808001	0.214035984875836	0.408530113558952	0.475008495749836	0.473185258191829	0.321406662746851	0.454097961028293	0.373872712212394	0.379733307914426	0.30166921085832	0.294820528874273
HORVU1Hr1G018850	0.677960935916362	0.855772278892121	0.96489885057184	0.750579664960783	0.725228316394355	0.53508996218959	1.4590361198534	0.82501475577603	1.3053386432878	1.32848087268698	1.42421633231601	1.26791615445942	1.21153007763174	1.1664542819855	1.93107446412649
HORVU1Hr1G018890	0.43868060559294	0.654414095623387	1.10274154351067	0.658671950883952	0.171764601251295	0.107017992437918	1.80920478861822	0.225004024302554	0.571085656438414	0.707094658043072	0.454097961028293	0.666468747856877	0.216990461665387	0.5027820180972	0.928684665953959
HORVU1Hr1G018930	4.00794553291732	4.91649564147827	6.36833241377415	7.91938136295356	6.37437520199249	6.01441117501099	7.0325540976934	5.92510597330058	5.72717329742524	5.29249637989814	7.55453880619797	7.73753960926521	4.068571156226	5.1887104267631	4.17171048357096
HORVU1Hr1G019000	0.558320770754651	0.352376820720285	0.344606732347086	0.275723142230492	0.286274335418824	0.214035984875836	0.496072280750157	0.600010731473477	0.195800796493171	0.17141688679832	0.103204082051885	0.162553353135824	0.361650769442311	0.10055640361944	0.560159004861118
HORVU1Hr1G019290	3.38980467958181	6.39312231878232	7.14025149423162	10.4468435000664	9.75241235993462	10.0382876906767	3.12233729648628	7.6251363791421	5.64558963221975	4.82109994120276	4.68546532515557	6.87600683764534	7.82973915842603	6.29483086657694	5.82270544526688
HORVU1Hr1G019320	19.6010470589936	27.1833547412791	24.0535499178266	23.0994721379767	25.9173698332509	23.4797475408792	20.572409289933	24.7004417789915	23.0555437870708	26.0553667933447	23.9433470360373	25.260791077307	34.7727214818782	30.1065872436603	33.8601377412102
HORVU1Hr1G019330	27.7764583450439	29.9855894584357	37.5345652872446	37.0081728682704	37.8072972309794	40.7524515203592	19.6678068956239	31.3255602723444	35.8968126904146	29.7836840812082	28.5462490955514	32.7382453215549	32.6751470191128	31.071928718407	29.3051605701027
HORVU1Hr1G019340	5.52338762496566	6.25888352993649	6.31319533659861	5.85145779622488	5.11476812614966	5.62914640223449	5.69024086742827	6.0251077618795	5.59663943309646	5.09965238225003	5.65558369644329	7.03856019078117	4.73762507969427	4.78648481228534	4.2159335629021
HORVU1Hr1G019380	3.64902503743218	4.24530169724915	0.234332577996018	0.137861571115246	0.0190849556945883	0	0.14590361198534	0	0.375284859945244	0.257125330197481	0.0619224492311309	0.390128047525977	0.180825384721155	0.060333842171664	0.0147410264437136
HORVU1Hr1G019390	20.9569689308264	18.0886767969746	16.4859860754846	17.2786502464441	16.4321468530405	15.1751513276968	13.2188672458718	12.4252222309299	17.6383884174264	14.0776118283121	13.086277604179	14.3046950759525	13.3629959308934	13.2131114355944	12.2203109218386
HORVU1Hr1G019410	25.1244346839593	41.0099499923989	3.11524486041766	2.06792356672869	0.133594689862118	0.363861174288921	0.933783116706177	0.175003130013097	3.03491234564414	1.99272130903048	0.495379593849047	1.1053628013236	2.54963792456829	1.74968142297826	0.589641057748545
HORVU1Hr1G019500	3.29010454194705	3.27207047811693	1.07517300492291	0.903759188422167	0.419869025280942	0.556493560677174	0.758698782323769	0.650011625762933	1.22375497808232	0.835657323141812	0.949477554877341	0.764000759738371	2.31456492443079	0.985452755470512	1.50358469725879
HORVU1Hr1G019530	2.17346300043775	5.23531276498709	5.19666952379406	2.63468780353581	0.458038936670119	1.0487763258916	1.60493973183874	1.02501833293386	0.195800796493171	0.12856266509874	0.866914289235833	0.780256095051954	0.415898384858657	0.241335368686656	0.132669237993423
HORVU1Hr1G019570	10.9271350847696	13.8265952511198	12.9296445976627	12.0399105440648	8.45463537270261	8.02634943284385	4.66891558353089	7.22512922482645	10.7853605401655	6.70668569598429	5.61430206362254	10.9073299954138	10.8314405447972	7.94395588593576	10.1565672197187
HORVU1Hr1G019580	0.817541128605025	0.805432733074938	1.07517300492291	0.995666902498997	1.01150265181318	0.749125947065426	1.42985539745633	0.82501475577603	1.68062350323305	1.77845020053258	1.75446939488204	3.34859907459797	1.30194276999232	1.60890245791104	1.14980006260966
HORVU1Hr1G019590	44.4263813300487	40.0031590760552	42.0282370770506	41.0367943353048	40.0784069586354	43.5777265207202	23.2570357504632	33.4505982796463	40.9713166661959	40.004415956558	27.5348490914429	26.5612179023936	25.659122091932	26.8686710471144	20.6964011269739
HORVU1Hr1G019600	9.39175296519431	10.0679091634367	9.44222446631015	8.54741740914524	6.79424422727343	7.27722348577842	5.13580714188397	5.77510329043221	8.56628484657621	10.1993047645001	7.65774288824986	8.85915774590239	10.0900564674405	10.2165306077351	8.72668765467847
HORVU1Hr1G019630	0.937181293766736	1.17458940240095	0.551370771755337	1.07225666422969	1.22143716445365	1.22000511379227	0.962963839103245	0.500008942894564	0.603719122520609	0.792803101442232	0.928836738466964	0.991575454128524	1.15728246221539	1.18656556270939	1.07609493039109
HORVU1Hr1G019640	0.0997001376347591	0.167798486057279	0.110274154351067	0.1991333804998	0.133594689862118	0.107017992437918	0.0875421671912041	0.325005812881467	0.0815836652054877	0.0428542216995801	0.20640816410377	0.243830029703736	0.560558692635582	0.321780491582208	0.501194899086263
HORVU1Hr1G019650	8.99295241465527	8.12144672517229	7.96730765186463	10.6766127852585	7.95842652464332	9.69583011487537	11.0594937884888	10.0001788578913	8.01151592317889	8.20658345546959	10.6506612677545	12.5491188620856	8.57112323578277	9.35174553660792	8.9772851042216
HORVU1Hr1G019660	6.93912957937923	5.92328655782194	5.91345152707599	7.56706845899238	5.0575132590659	6.35686875081233	8.54995166234093	6.17511044474786	5.38452190356219	5.35677771244752	6.85275104824516	7.60749692675655	4.99078061830389	5.91271653282307	5.33625157262433
HORVU1Hr1G019670	1.43568198194053	2.29883925898472	2.23305162560912	2.22110309019007	1.25960707584283	1.45544469715568	0.700337337529633	1.35002414581532	1.56640637194536	1.86415864393174	1.42421633231601	1.90187423168914	0.867961846661546	0.60333842171664	0.707569269298254
HORVU1Hr1G019770	4.62608638625282	7.48381247815463	2.83955947453999	1.60838499634453	0.687058405005178	0.898951136478511	0.817060227117905	7.52513459056319	1.40323904153439	0.385687995296221	0.970118371287718	3.29983306865722	4.01432354080965	3.03680338930709	7.25258501030711
HORVU1Hr1G019870	0.498500688173796	0.620854398411931	0.895977504102423	1.07225666422969	1.20235220875906	0.898951136478511	0.408530113558952	0.600010731473477	0.946370516383658	0.364260884446431	1.15588571898111	1.02408612475569	0.759466615828853	0.985452755470512	0.85497953373539
HORVU1Hr1G019900	0.498500688173796	0.620854398411931	0.895977504102423	1.07225666422969	1.20235220875906	0.898951136478511	0.408530113558952	0.600010731473477	0.946370516383658	0.364260884446431	1.15588571898111	1.02408612475569	0.759466615828853	0.985452755470512	0.85497953373539
HORVU1Hr1G019940	0.0199400275269518	0.100679091634367	0.110274154351067	0.214451332845938	0.343529202502589	0.214035984875836	0	0.175003130013097	0.244750995616463	0.192843997648111	0.0825632656415079	0.308851370958065	0.108495230832693	0.261446649410544	0.3243025817617
HORVU1Hr1G020000	30.7674624740867	36.0598946537092	44.2475044333658	31.1260791673533	28.9900477000796	32.5548732996147	40.1234932959685	47.0258410792337	20.5590836317829	17.5273766751283	27.0807511304146	24.8869183650946	49.3110824134591	38.6739928320366	62.6641034122266
HORVU1Hr1G020010	0.598200825808555	0.973231219132216	0.827056157633006	0.796533521999198	0.343529202502589	0.385264772776505	0.233445779176544	0.250004471447282	0.620035855561707	0.578531992944332	0.47473877743867	0.503915394721053	0.415898384858657	0.442448175925536	0.147410264437136
HORVU1Hr1G020020	1.1166415415093	1.0235707649494	2.37089431854795	1.24075414003721	0.935162829034826	1.09158352286676	0.787879504720837	1.85003308870989	0.554768923397317	0.492823549545171	0.495379593849047	0.633958077229712	1.10303484679905	0.583227140992752	0.619123110635972
HORVU1Hr1G020040	7.67691059787645	5.31921200801573	4.20420213463445	3.73758037245778	3.98875574016895	3.68141893986438	9.42537333425297	6.35011357476096	3.81811553161683	4.45683905675633	5.98583675900932	6.85975150233176	4.35789177177985	6.31494214730083	6.07330289481002
HORVU1Hr1G020050	2.27316313807251	1.87934304384152	1.30950558291893	1.10289256892197	0.973332740424003	1.3056195077426	2.80134935011853	2.20003934873608	1.01163744854805	1.77845020053258	1.3416530666745	1.9343849023163	1.42852053929713	2.39324240614267	2.12270780789476
HORVU1Hr1G020060	7.67691059787645	5.31921200801573	4.20420213463445	3.73758037245778	3.98875574016895	3.68141893986438	9.42537333425297	6.35011357476096	3.81811553161683	4.45683905675633	5.98583675900932	6.84349616701818	4.35789177177985	6.31494214730083	6.07330289481002
HORVU1Hr1G020070	2.27316313807251	1.87934304384152	1.30950558291893	1.10289256892197	0.973332740424003	1.3056195077426	2.80134935011853	2.20003934873608	1.01163744854805	1.77845020053258	1.3416530666745	1.9343849023163	1.42852053929713	2.39324240614267	2.12270780789476
HORVU1Hr1G020120	10.0497738735837	8.32280490844102	7.26430991787657	7.00030422218526	6.14535573365743	5.99300757652341	4.84399991791329	5.0500903232351	7.09777887287743	8.29229189886875	6.56377961849988	5.12043062377845	5.40667900316255	4.62559456649424	4.65816435621351
HORVU1Hr1G020140	0.478560660646844	0.755093187257754	0.110274154351067	0.0306359046922768	1.16418229736989	0	0.846240949514973	0.350006260026195	0.0815836652054877	0.364260884446431	2.18792653949996	0.650213412543295	5.38859646469043	4.92726377735256	8.7561697075659
HORVU1Hr1G020150	1.37586189935968	1.20814909961241	1.33707412150669	1.08757461657583	0.66797344931059	0.577897159164757	1.4590361198534	0.875015650065487	1.56640637194536	1.97129419818069	2.14664490667921	1.60927819604465	1.13919992374328	1.48823477356771	1.17928211549709
HORVU1Hr1G020170	2.83148390882716	3.45664881277994	4.38339763545493	4.54943184680311	5.7064017526819	3.6600153413768	3.00561440689801	3.67506573027504	7.19567927112402	4.41398483505675	6.41929390362724	6.82724083170459	4.44830446414042	5.06804274241978	5.98485673614773
HORVU1Hr1G020190	0.43868060559294	0.587294701200475	1.03382019704126	0.965030997806721	0.763398227783532	0.556493560677174	0.350168668764816	0.900016097210215	0.766886452931585	1.0713555424895	1.0733224533396	0.95906478350136	0.994539615966355	0.764228667507744	1.57728982947736
HORVU1Hr1G020200	1.19640165161711	0.721533490046298	0.88219323480854	1.1182105212681	1.04967256320236	1.09158352286676	1.95510840060356	1.1500205686575	1.28902191024671	1.15706398588866	1.83703266052355	2.19447026733362	0.958374539022124	1.04578659764218	0.884461586622818
HORVU1Hr1G020240	77.7661073551121	102.222837706094	177.348408735104	200.190319211683	125.941622628588	114.059776340333	89.7015406485871	97.6017456530189	193.826471795198	127.876997551547	113.214878010918	182.466138894962	144.28057446901	131.909890267981	126.905496653931
HORVU1Hr1G020270	0.618140853335507	0.738313338652026	0.716782003281939	1.04162075953741	0.801568139172708	0.77052954555301	0.466891558353089	0.9750174386444	1.12585457983573	1.37133509438656	0.970118371287718	1.15412880726435	1.15728246221539	1.14634300126162	0.560159004861118
HORVU1Hr1G020300	3.17046437678534	2.66799592831073	2.64657970442562	3.00231865984313	2.57646901876942	3.10352178069962	2.62626501573612	2.47504426732809	2.80647808306878	2.05700264157985	2.64202450052825	3.05600303895348	2.27839984748656	3.07702595075486	1.93107446412649
HORVU1Hr1G020330	1.79460247742566	2.55053698807064	2.1641302791397	1.93006199561344	0.66797344931059	0.663511553115092	1.57575900944167	0.700012520052389	1.19112151200012	1.41418931608614	0.846273472825456	1.46298017822241	1.17536500068751	1.02567531691829	1.47410264437136
HORVU1Hr1G020340	2.45262338581507	3.17139138648257	2.4122471264296	2.25173899488235	0.839738050561885	1.0487763258916	2.01346984539769	0.875015650065487	1.43587250761658	1.7141688679832	1.27973061744337	1.83685289043481	1.21153007763174	1.24689940488106	1.35617443282165
HORVU1Hr1G020360	46.2409238350013	46.0271247255115	53.1797109358023	73.4342635473876	77.8857041896148	70.8887181908769	65.627444671006	76.4263669214341	75.3017229846652	60.9815574785025	65.761641083461	74.888329789674	59.7447071118698	60.9371805933806	54.8955824763896
HORVU1Hr1G020390	66.220831417007	74.0494718970771	72.491472216533	81.1085576728029	74.1259679177809	80.1992835329758	44.4130594883375	63.0011268047151	61.0082648406637	52.3464318060371	47.7628491736123	52.3584350450488	56.9238311102197	50.0167551603095	41.4812484126101
HORVU1Hr1G020400	76.9485662265071	77.1705237377425	81.6580112969655	87.5420976581811	87.5426917710765	90.6442395949166	69.6835650841985	78.0513959858414	81.5020815402822	74.2877933162221	71.2108166158006	77.2941194160842	89.9606288987748	89.8370909936077	81.5915813659549
HORVU1Hr1G020410	149.011825708911	80.5768330047052	83.0226539570599	111.989549602618	56.0334299193112	158.172592823243	96.7632754686776	259.754645833726	62.0851692213762	31.2835818406935	56.6590410464848	60.8599754140524	175.183632717855	118.696778832387	129.617845519574
HORVU1Hr1G020420	4.36686602840245	3.4902085099914	1.9160134318498	4.31966256161104	4.54221945531201	4.60177367483047	6.85746976331099	7.77513906201047	3.41019720558939	5.50676748839605	5.67622451285367	3.80374846337827	4.62912984886158	3.92169974115816	5.1888413081872
HORVU1Hr1G020430	131.404781402613	72.203688550447	75.1242676516647	102.124788291705	50.5560476349644	143.725163844124	89.3513719798223	234.779199136142	55.2647748101974	26.7624614513878	49.7237267325981	54.7967353420862	161.730224094601	109.385255857227	118.09036284059
HORVU1Hr1G020450	293.45738511415	182.229155858205	159.098036190003	189.192029427156	124.395741217326	248.046302872606	128.307636379908	319.980723005376	128.053720906534	99.8503365600217	140.956135266464	132.594770152891	207.153560736556	176.355820667774	164.21503458297
HORVU1Hr1G020470	2.95112407398887	4.0942830597976	5.1553167159124	6.44885793772428	6.87058405005178	6.27125435686199	3.23906018607455	5.02508987609037	5.48242230180877	3.72831728786347	4.00431838361313	6.59966613731444	4.8822853874712	4.06247870622538	4.26015664223324
HORVU1Hr1G020480	5.02488693679186	5.06751427892982	4.7417886370959	5.31532946411003	6.14535573365743	7.12739829636534	6.04040953619308	4.85008674607727	5.77612349654853	5.84960126199269	5.09828165336311	3.99881248714126	5.26201869538562	6.3752759894725	6.47131060879028
HORVU1Hr1G020490	6.18140853335507	5.43667094825583	5.40343356320231	5.88209370091715	6.94692387283014	7.55547026611701	6.68238542892858	5.15009211181401	6.47774301731573	6.57812303088555	5.92391430977819	4.38894053466724	5.73216469566063	7.13950465698024	7.16413885164482
HORVU1Hr1G020500	14.7556203699444	18.1725760400033	16.4584175368968	17.5390554363285	14.2182919924683	15.1537477292092	9.9506263374002	14.8252651568238	15.386679257755	16.7560006845358	14.2008816903394	11.3299687135669	9.29442477466739	9.2109665715407	7.20836193097596
HORVU1Hr1G020530	44.9647620732764	38.7111107334142	37.8929562888856	38.3255167700383	38.8760547498763	42.1864926190273	39.6274210152184	28.050501696385	40.4165477427986	41.5685950485927	39.3620368945889	37.7448885981383	32.8198073268897	37.4673159886033	31.7521709597592
HORVU1Hr1G020620	7.91619092819987	8.25568551401811	8.76679527090987	12.2696798292569	11.6227380180043	14.1477786002928	5.86532520181068	6.6501189404977	11.9438485860834	10.0493149885515	10.4236122872404	11.2161813663718	9.71032315952605	10.5181998185934	7.84222606805565
HORVU1Hr1G020650	2.53238349592288	6.00718580085058	6.13399983577813	5.00897041718726	4.67581414517413	4.70879166726839	2.04265056779476	4.92508808751145	2.52909362137012	1.73559597883299	2.22920817232071	2.81217300924975	3.63459023289522	2.63457777482933	3.25776684406071
HORVU1Hr1G020690	2.1535229729108	0.251697729085918	0.261901116583785	1.24075414003721	20.6308371058499	15.1323441307216	38.4893728417327	6.4751158104846	9.51265536295987	4.0925781723099	3.4057347077122	5.29923931222785	17.4858147025357	6.3752759894725	7.14939782520111
HORVU1Hr1G020720	0.21934030279647	0.117458940240095	0.0827056157633006	0.0919077140768305	0.267189379724236	0.128421590925502	0.14590361198534	0.125002235723641	0.375284859945244	0.385687995296221	0.701787757952817	0.146298017822241	0.198907923193271	0.241335368686656	0.0737051322185681
HORVU1Hr1G020790	0.0398800550539036	0.0838992430286393	0.124058423644951	0.229769285192076	0.209934512640471	0.107017992437918	0.0583614447941361	0.100001788578913	0.146850597369878	0.0214271108497901	0.0619224492311309	0.178808688449406	0.144660307776924	0.080445122895552	0.176892317324564
HORVU1Hr1G021000	2.6919037161385	4.11106290840333	7.65026945810531	10.2477101195666	12.5960707584283	10.0596912891643	3.4725059652511	6.07510865616895	11.7317310565491	5.84960126199269	5.42853471592914	8.98920042841105	7.59466615828853	5.38982323400198	4.90876180575664
HORVU1Hr1G021120	24.2271334452465	24.4985789643627	25.1149386534556	26.2856062259735	20.2300530362636	22.0243028437235	12.3434455739598	16.3252919855075	20.1511653057555	18.2558984440211	19.9390286524242	23.1475974865413	20.5779287812675	18.9649377226264	20.2983934129937
HORVU1Hr1G021130	33.6787064930216	31.9488317453059	30.7113519867723	32.2136537839291	26.2608990357535	27.7604672383959	36.0965536051732	30.9505535651735	29.1416852114002	34.5833569115612	35.4402817766173	33.8923741288192	27.7386140162252	31.7557122630192	27.6246835555193
HORVU1Hr1G021140	2.7716638262463	9.24569658175606	0.689213464694172	0.0765897617306921	0.11450973416753	0.0856143939503344	0.116722889588272	0.0250004471447282	0.505818724274024	0.578531992944332	0.20640816410377	0.178808688449406	0.216990461665387	0.221224087962768	0.0737051322185681
HORVU1Hr1G021150	3.310044569474	4.26208154585488	2.05385612478863	0.444220618038014	0.648888493616002	0.684915151602675	1.66330117663288	0.9750174386444	1.15848804591793	0.942792877390763	0.619224492311309	0.308851370958065	0.65097138499616	0.40222561447776	0.206374370211991
HORVU1Hr1G021160	5.10464704689967	4.96683518729545	2.45359993431125	1.68497475807523	1.87032565806965	1.71228787900669	1.54657828704461	1.40002504010478	2.23539242663036	2.05700264157985	1.50677959795752	1.30042682508659	1.84441892415579	1.54856861573938	0.515935925529977
HORVU1Hr1G021170	0.378860523012085	0.570514852594747	0.0137842692938834	0.0459538570384153	0.0190849556945883	0.0428071969751672	0.14590361198534	0.0500008942894564	0.0815836652054877	0.10713555424895	0.185767347693393	0.178808688449406	0.198907923193271	0.10055640361944	0.103187185105995
HORVU1Hr1G021190	22.4923510504017	22.6695754663383	24.5497836124064	27.771447603549	29.7534459278631	26.4762513291409	17.1874454918731	24.5754395432678	24.0998147017011	21.5985277365884	24.7896205088627	27.8941553981073	29.2032996324666	25.7826618880244	26.5928117044594
HORVU1Hr1G021230	6.32098872604373	6.46024171320523	8.39461999997501	9.25204321706761	8.93175926506732	8.96810776629753	4.40628908195727	6.72512028193188	6.34720915298695	6.17100792473954	6.21288573952347	6.51838946074653	6.11189800357505	5.63115860268864	7.01672858720769
HORVU1Hr1G021250	0.159520220215615	0.218138031874462	0.385959540228736	0.29104109457663	0.190849556945883	0.128421590925502	0.233445779176544	0.0750013414341846	0.358968126904146	0.214271108497901	0.371534695386786	0.585192071288965	0.343568230970195	0.422336895201648	0.309561555317986
HORVU1Hr1G021340	0.299100412904277	0.335596972114557	0.385959540228736	0.459538570384153	0.438953980975531	0.29965037882617	0.0875421671912041	0.150002682868369	0.163167330410975	0.278552441047271	0.454097961028293	0.211319359076571	0.48822853874712	0.341891772306096	0.545417978417404
HORVU1Hr1G021390	16.2710624619927	29.8010111237727	52.7799671262797	46.5206212752224	47.1970954327168	37.4991045502465	17.1290840470789	36.8506590913294	42.0319043138673	27.9195254372764	31.6010899242871	47.7094091453642	30.5956550948195	28.4373509435776	32.5629274141634
HORVU1Hr1G021490	0.538380743227699	0.268477577691646	0.372175270934853	0.459538570384153	0.229019468335059	0.342457575801338	0.175084334382408	0.200003577157826	0.212117529534268	0.299979551897061	0.392175511797163	0.292596035644483	0.144660307776924	0.30166921085832	0.176892317324564
HORVU1Hr1G021530	8.7736121118588	13.0043826694391	12.9572131362504	10.293663976605	13.4167238532956	10.9158352286676	13.4814937474454	12.1252168651932	12.3354501790697	15.5775095877974	14.9852327139337	16.3366119901503	13.1640880077001	11.9259894692656	14.3430187297334
HORVU1Hr1G021540	37.7065920534659	37.2344840561101	43.3101741213818	52.7090740230623	49.83081931857	49.4423125063181	33.9955415925843	46.8008370549312	40.6939322044973	37.8188506498795	33.0253062566032	43.8731500113588	42.8194511019696	40.222561447776	35.9238814433301
HORVU1Hr1G021550	20.1593678297483	21.0754898487942	21.7653612150419	15.9766242970224	20.6117521501554	19.6485034116017	16.4871081543434	16.2252901969286	24.9482848198381	24.3197708145117	17.9368694606176	16.076526625133	24.1582713987464	23.530198446949	21.5956037400405
HORVU1Hr1G021560	3.72878514753999	4.48021957772934	6.1615683743659	8.16446860049178	10.1341114738264	8.45442140259552	4.96072280750157	6.77512117622134	5.82507369567182	5.35677771244752	5.65558369644329	7.62375226207013	8.69770100508758	6.61661135815915	8.21075172914849
HORVU1Hr1G021590	0.0199400275269518	0.23491788048019	0.234332577996018	0.137861571115246	0.11450973416753	0.0214035984875836	0	0.100001788578913	0.0652669321643902	0.0428542216995801	0.227048980514147	0.0975320118814942	0.596723769579813	0.020111280723888	0.103187185105995
HORVU1Hr1G021600	6.12158845077421	7.45025278094317	7.92595484398298	12.4688132097567	11.9471822648123	9.5246013269747	11.0011323436946	7.70013772057628	14.880860533481	13.8204864981146	11.0634775959621	14.6298017822241	8.53495815883854	10.417643414974	10.1565672197187
HORVU1Hr1G021620	1.63508225721005	2.71833547412791	2.04007185549475	3.1095443262661	3.60705662627719	2.95369659128654	3.79349391161884	2.45004382018336	2.20275896054817	2.5926804128246	2.64202450052825	2.64961965611393	1.32002530846443	1.81001526514992	0.913943639510245
HORVU1Hr1G021650	0.0398800550539036	0.0503395458171836	0.0551370771755337	0	0.152679645556706	0.0214035984875836	0	0.0250004471447282	0.0163167330410975	0.0214271108497901	0.020640816410377	0.0487660059407471	2.00716177040483	0.522893298821088	0.545417978417404
HORVU1Hr1G021680	0.299100412904277	0.151018637451551	0.206764039408252	0.122543618769107	0.0381699113891766	0.107017992437918	0.0583614447941361	0.0500008942894564	11.878581653919	12.449151403728	7.6164612554291	3.83625913400544	1.42852053929713	5.73171500630808	0.117928211549709
HORVU1Hr1G021690	53.1999934419075	43.5604869804695	36.5972349752605	38.1570192942308	37.730957408201	44.8619424299752	51.9416858667811	38.1256818957105	42.0482210469084	44.3755465699152	37.4011593356031	33.5022460812933	30.667985248708	37.7287626380139	31.0003786111298
HORVU1Hr1G021700	14.7157403148904	12.2492894821813	11.7993345155642	12.3615875433337	9.35162829034826	9.63161931941262	11.584746791636	11.6252079222986	9.67582269337085	9.96360654515238	11.2905265764762	12.3865655089498	8.13714231245199	9.07018760647349	9.37529281820187
HORVU1Hr1G021720	239.340150406003	195.065740041586	155.43142055783	164.376946626411	126.609596077899	161.019271422091	181.474912587366	146.102613113792	142.135061521001	169.702717930337	140.956135266464	150.443128327205	173.917855024807	168.11019557098	186.901474279845
HORVU1Hr1G021760	9.79055351573335	7.97042808772074	10.0073795073594	12.2390439245646	7.36679289811108	8.3474034101576	4.37710835956021	5.90010552615585	9.10473703693243	7.09237369128051	5.24276736823575	5.96570806008473	5.91299008038178	5.22893298821088	2.74183091853074
HORVU1Hr1G021780	106.340166801234	77.136964040531	83.3948292279948	99.8424133921302	53.2088564765122	64.6174638340149	81.501757655011	119.327134221788	49.9618365718407	57.5317926316863	73.1304125419656	72.7101148576539	51.9692155688601	80.626124422067	74.7959681754029
HORVU1Hr1G021800	10.0298338460568	9.0946779443045	10.8068671264046	11.7948233065266	17.0428654352673	15.9028736762746	20.1930598987711	14.3002557667845	14.4403087413713	14.4418727127585	14.2834449559809	12.028948132051	14.249040316027	16.0286907369387	15.4633367394556
HORVU1Hr1G021830	0.259220357850374	0.285257426297374	0.510017963873687	0.229769285192076	0.286274335418824	0.214035984875836	0.408530113558952	0.475008495749836	0.326334660821951	0.257125330197481	0.598583675900932	0.34136204158523	0.16274284624904	0.30166921085832	0.250597449543132
HORVU1Hr1G021840	59.9596627735441	101.350285578596	120.805336091594	113.827703884155	113.650911161273	128.335976531551	69.4209385826249	100.626799757531	80.4741273586931	72.7236142241875	74.1830941788948	75.0671384781234	105.403116753961	87.2427357802261	106.710290426043
HORVU1Hr1G021890	6.79954938669057	6.25888352993649	7.12646722493774	5.28469355941776	4.29411503128237	3.9168585232278	3.15151801888335	3.22505768166994	5.00923704361695	4.3068492808078	4.25200818053766	4.45396187592157	3.8334981560885	4.00214486405371	3.53784634649127
HORVU1Hr1G021900	10.3089942314341	8.42348400007539	11.1376895894578	14.0771982061012	15.1152849101139	15.5390125019857	15.0864334792842	12.7002271495219	16.2025159098099	16.1988958024413	14.5930572021365	14.9223978178686	13.2364181615886	14.5605672440949	13.6354494604351
HORVU1Hr1G021930	1.29610178925187	1.04035061355513	0.895977504102423	0.597400141499398	1.83215574668048	1.47684829564327	1.3714939526622	1.22502191009168	1.12585457983573	1.64988753543383	2.8690734810424	0.991575454128524	8.17330738939622	4.84681865445701	9.10995434221502
HORVU1Hr1G021990	1.75472242237176	4.49699942633507	7.56756384234201	8.04192498172267	9.67607253715626	7.72669905401768	3.6475902996335	7.00012520052389	8.19099998663097	5.95673681624164	6.15096329029234	12.0939694733053	9.16784700536258	7.76295435942077	10.1123441403875
HORVU1Hr1G022020	0.638080880862458	1.89612289244725	0.137842692938834	0.153179523461384	0.0954247784729415	0.0642107954627508	0.379349391161884	0.0500008942894564	0	0	0.103204082051885	0.0487660059407471	0.0180825384721155	0.10055640361944	0.0294820528874273
HORVU1Hr1G022050	0.737781018497218	0.587294701200475	0.523802233167571	0.428902665691876	0.381699113891766	0.192632386388252	0.233445779176544	0.325005812881467	0.358968126904146	0.342833773596641	0.330253062566032	0.520170730034636	0.180825384721155	0.30166921085832	0.294820528874273
HORVU1Hr1G022060	0.398800550539037	1.29204834264105	0.634076387518638	0.1991333804998	0.0954247784729415	0	0.0583614447941361	0.575010284328749	0.815836652054877	0.921365766540973	0.536661226669801	1.08910746601002	1.44660307776924	1.3474558085005	2.29960012521933
HORVU1Hr1G022100	4.8853067441032	6.05752534666776	6.12021556648425	6.96966831749298	9.16077873340238	8.0905602283066	6.71156615132565	5.45009747755075	9.64318922728865	9.23508477625952	7.82286941953287	7.47745424424789	8.8423613128645	8.40651534258518	8.15178762337364
HORVU1Hr1G022110	0.558320770754651	0.419496215143197	0.303253924465436	0.168497475807523	0.381699113891766	0.556493560677174	0.700337337529633	0.750013414341846	0.603719122520609	0.749948879742652	0.557302043080178	0.471404724093889	0.289320615553849	0.643560983164416	0.515935925529977
HORVU1Hr1G022130	58.9826014247235	60.9779698332151	56.0881917568117	53.3064741645617	57.4838865520999	64.3606206521639	58.5948905733126	54.9259823769678	48.1180457381967	51.2750762635476	42.6232858874285	38.7852300582075	40.215565561985	41.2281254839704	33.7127274767731
HORVU1Hr1G022170	0.358920495485133	0.285257426297374	0.261901116583785	0.566764236807122	0.66797344931059	0.406668371264088	0.525253003147225	0.575010284328749	0.375284859945244	0.535677771244751	0.536661226669801	0.585192071288965	1.15728246221539	0.864785071127184	1.41513853859651
HORVU1Hr1G022180	0.817541128605025	0.503395458171836	0.385959540228736	0.612718093845537	0.610718582226825	0.556493560677174	1.3714939526622	0.325005812881467	1.46850597369878	1.67131464628362	1.0733224533396	1.05659679538285	0.65097138499616	0.864785071127184	0.751792348629395
HORVU1Hr1G022190	5.88230812045079	5.45345079686156	5.89966725778211	6.95435036514684	8.83633448659438	6.63511553115092	7.32436132166408	6.72512028193188	9.9858406211517	9.59934566070595	8.81362860723097	9.54188182907285	8.87852638980873	10.2768644499068	10.7167262245798
HORVU1Hr1G022250	36.430430291741	36.1605737453436	38.9129922166329	38.6318758169611	37.3683432500039	37.8415621260478	43.2458305924548	42.400758357459	40.3839142767164	41.2043341641463	41.3022736371643	42.0200417856104	53.1807456464918	49.0313024048389	56.1927928034364
HORVU1Hr1G022270	3.36986465205486	6.05752534666776	6.05129422001483	7.12284784095437	7.30953803102731	6.74213352358883	4.78563847311916	6.15010999760314	5.67822309830195	4.5211203893057	5.92391430977819	7.39617756767998	10.1985516982732	7.34061746421912	10.038639008169
HORVU1Hr1G022290	0.777661073551121	0.855772278892121	0.675429195400288	0.628036046191675	1.12601238598071	0.877547537990928	2.39281923655958	1.40002504010478	0.701619520767194	0.921365766540973	1.0733224533396	0.942809448187777	2.2060696935981	1.48823477356771	2.21115396655704
HORVU1Hr1G022310	6.69984924905581	10.1853681036768	12.4609794416706	14.3529213483317	14.1419521696899	13.2702310623018	7.82043360241423	10.6751909307989	13.1676035641657	11.7206296348352	11.0221959631413	16.9218040614392	14.8819291625511	11.2220946439295	14.3577597561771
HORVU1Hr1G022370	27.5770580697744	35.9256558648634	31.7038193759319	26.4541037017811	24.1615539093488	31.1850429964093	22.5566984129336	30.7005490937262	25.7151712727697	24.6411774772586	19.5055715078062	18.6611249399926	25.3155538609618	21.0766221986346	22.6422166175441
HORVU1Hr1G022380	4.74572655141453	6.15820443830213	2.6603639737195	1.21011823534494	2.67189379724236	2.05474545480803	2.13019273498597	3.85006886028814	2.41487649008244	4.3068492808078	3.55022042258484	3.39736508053871	3.12827915567599	1.56867989646326	2.21115396655704
HORVU1Hr1G022390	2.01394278022213	1.05713046216086	0.951114581277957	0.765897617306921	0.954247784729415	0.727722348577842	2.30527706936837	1.42502548724951	0.832153385095975	1.34990798353677	1.259089801033	1.49549084884958	0.741384077356737	1.46812349284382	1.25298724771566
HORVU1Hr1G022400	0.518440715700747	0.620854398411931	0.372175270934853	0.413584713345737	0.11450973416753	0.23543958336342	0.262626501573612	0.350006260026195	0.195800796493171	0.449969327845591	0.247689796924524	0.357617376898812	0.307403154025964	0.40222561447776	0.353784634649127
HORVU1Hr1G022410	1.93418267011433	2.21494001595608	1.86087635467426	2.40491851834373	1.54588141126165	2.05474545480803	2.48036140375078	1.75003130013097	2.39855975704134	2.09985686327943	2.37369388719335	2.81217300924975	1.75400623179521	2.37313112541878	2.19641294011333
HORVU1Hr1G022420	14.0377793789741	12.7359050917475	11.4960805910988	13.1428031129868	12.5197309356499	13.4414598502025	12.9854214666953	9.90017706931237	13.542888424111	12.8134122881745	11.9510327016083	12.0126927967374	10.7591103909087	12.6902181367733	11.1589570178912
HORVU1Hr1G022430	1.15652159656321	1.81222364941861	0.372175270934853	0.306359046922768	0.419869025280942	0.406668371264088	0.0583614447941361	0.100001788578913	3.89969919682231	3.36405640341704	2.00215919180657	1.49549084884958	1.35619038540867	2.25246344107546	1.01713082461624
HORVU1Hr1G022450	0.757721046024169	0.805432733074938	1.48870108373941	2.00665175734413	4.86666370212001	2.20457064422111	1.98428912300063	1.62502906440733	2.43119322312353	1.90701286563132	3.17868572719805	4.08008916370917	3.7250029252558	2.99658082785931	4.03904124557753
HORVU1Hr1G022460	0.119640165161711	0.167798486057279	0.151626962232718	0.306359046922768	0.248104424029648	0.128421590925502	0.204265056779476	0.0750013414341846	0.163167330410975	0.299979551897061	0.268330613334901	0.211319359076571	0.16274284624904	0.20111280723888	0.221115396655704
HORVU1Hr1G022470	0.159520220215615	0.285257426297374	0.220548308702135	0.428902665691876	0.305359291113413	0.29965037882617	0.437710835956021	0.325005812881467	0.244750995616463	0.814230212292022	0.330253062566032	0.211319359076571	0.397815846386542	0.181001526514992	0.221115396655704
HORVU1Hr1G022530	0.398800550539037	0.671193944229115	0.854624696220773	1.21011823534494	1.7939858352913	1.00596912891643	2.30527706936837	1.65002951155206	1.50113943978097	2.20699241752838	1.63062449641978	1.9343849023163	2.27839984748656	1.87034910732158	3.09561555317986
HORVU1Hr1G022550	46.8989447433907	41.1945283270619	44.1785830868964	27.9399450793565	55.4990511598627	70.8887181908769	59.178505021254	68.5012251765553	38.9317250360587	36.8117764399393	23.9020654032165	29.6822422826014	28.4619155551099	35.0539623017368	23.320303833955
HORVU1Hr1G022570	138.662951422423	113.230418391452	90.8796874545735	88.1854516567189	68.1142068739856	90.109149632727	123.755443685966	86.3515444378912	93.8864819184753	118.256224779991	95.5876207964558	85.8281704557149	91.0274986686296	100.154178004962	98.7943592257687
HORVU1Hr1G022620	1.05682145892845	1.10747000797804	1.37842692938834	2.06792356672869	2.50012919599107	2.39720303060936	2.62626501573612	1.72503085298625	2.13749202838378	1.52132487033509	1.71318776206129	1.9343849023163	1.95291415498848	1.97090551094102	1.88685138479534
HORVU1Hr1G022660	96.0710526248539	84.3187392437825	67.873742003082	70.5238526016213	66.3774759057781	77.5880445174906	153.66568414296	84.5765126906155	65.1527150331025	83.4800238707821	88.6316656661587	67.5896842338755	42.8013685634975	53.6770082520571	40.3314483500005
HORVU1Hr1G022700	25.5032952069714	26.4282615540214	28.5472217076326	20.2809689062873	20.3636477261257	18.2786731083964	32.5656861951279	22.0253939345055	18.225790806906	19.4343895407596	21.5696531488439	19.4413810350445	22.7116683209771	23.5100871662251	27.6983886877379
HORVU1Hr1G022710	22.8512715458868	23.5924671396534	26.3003858127296	18.4734505294429	18.4933220680561	16.2025240551008	30.8440235737009	19.6253510086116	16.6430677019195	17.9773460029739	19.9803102852449	17.5069961327282	21.2108176277915	22.4643005685829	26.6222937573468
HORVU1Hr1G022720	5.40374745980394	5.26887246219855	4.05257517240173	3.87544194357302	3.24444246808001	3.98106931869055	2.85971079491267	3.27505857595939	3.06754581172634	3.4497648468162	3.65342450463672	4.30766385809933	2.73046330928945	2.57424393265766	1.90159241123906
HORVU1Hr1G022750	94.6353706429134	113.918392184286	99.8532467648916	113.276257599694	105.387125345517	116.927858537669	86.7251069640862	108.801945973857	103.366503815353	102.721569413894	93.6680248702907	87.226129292683	92.799587438897	89.1935300104433	84.8346071835719
HORVU1Hr1G022780	1.45562200946748	2.651216079705	1.47491681444553	1.01098485484514	1.16418229736989	1.15579431832951	0.641975892735497	0.875015650065487	0.407918326027439	0.557104882094542	1.09396326974998	0.520170730034636	2.00716177040483	1.04578659764218	1.32669237993423
HORVU1Hr1G022790	1.17646162409016	1.57730576893842	1.41977973726999	1.42456956819087	3.01542299974495	1.09158352286676	1.28395178547099	1.52502727582842	4.43815138717853	4.39255772420696	4.85059185643859	5.12043062377845	4.80995523358273	5.71160372558419	8.2254927555922
HORVU1Hr1G022800	4.72578652388758	3.03715259763674	3.21173474547484	4.07457532407282	5.40104246156849	5.56493560677174	10.0381685045914	5.5000983718402	7.04882867375414	7.62805146252526	7.36877145850458	6.29081476635638	6.38313608065679	9.45230194022736	8.41712609936048
HORVU1Hr1G022810	131.68394178799	109.38783306074	97.7304692936335	79.8524855804196	53.7050653245714	59.6946361818707	39.5106981256301	37.0756631156319	62.1993863526638	67.3882636225897	54.3472696085226	56.6010775618938	53.9040471853764	44.888378575718	33.9485838998725
HORVU1Hr1G022840	43.1900996233777	28.6264217213717	32.4343856485077	40.2249428609595	55.2700316915277	84.6512320183931	113.513010124595	144.327581366516	32.7150497474006	35.419014234703	54.5949594054471	42.42642516845	59.5638817271486	45.6324959625019	45.4760665788565
HORVU1Hr1G022870	0.697900963443314	0.805432733074938	0.620292118224755	1.02630280719127	1.33594689862118	0.898951136478511	1.22559034067686	0.750013414341846	0.93005378334256	1.39276220523635	0.722428574363194	0.650213412543295	0.723301538884622	1.02567531691829	1.22350519482823
HORVU1Hr1G022990	33.0605656396861	24.4314595699398	23.6262375697162	23.2220157567458	12.5769858027337	15.1965549261844	21.6520960186245	18.2003255213621	17.6220716843854	15.920343361394	17.6272572144619	21.5870852964374	16.0392116247665	17.4364803876109	13.7533776719848
HORVU1Hr1G023030	4.8853067441032	10.0175696176195	16.2103006896069	16.8037937237138	16.4703167644297	12.4782979182612	7.49944565604648	12.5502244666536	13.4776214919466	10.0921692102511	12.2606449477639	16.7267400376763	16.3827798557367	13.4343355235572	15.3601495543496
HORVU1Hr1G023060	50.089349147703	48.6783408052165	54.5443535958968	52.785663784793	51.128596305802	60.7006053107871	38.7811800657034	47.9508576235887	38.7196075065245	32.9334693761273	34.8004164678956	34.2499915057181	40.5229687160109	34.4305125992963	36.395594289529
HORVU1Hr1G023070	18.2451251871609	24.045523052008	40.6222416090745	44.1310207092248	54.1058493941578	40.6882407248964	28.8889151730974	38.5256890500262	42.0645377799495	32.4835000482817	38.1442287263766	51.5781789499969	50.6491902603956	45.793386208293	55.4999645605818
HORVU1Hr1G023160	1.93418267011433	1.14102970518949	1.21301569786174	1.73092861511364	3.30169733516377	1.99053465934527	5.04826497469277	5.22509345324819	2.67594421874	2.09985686327943	2.58010205129712	2.47081096766452	3.38143469428561	2.45357624831434	3.59681045226613
HORVU1Hr1G023190	0.578260798281603	0.419496215143197	0.179195500820485	0.245087237538215	0.305359291113413	0.428071969751672	0.175084334382408	0.27500491859201	0.261067728657561	0.17141688679832	0.350893878976409	0.178808688449406	0.216990461665387	0.341891772306096	0.250597449543132
HORVU1Hr1G023220	30.9070426667753	19.179366956347	13.9634647947039	24.9988982288979	36.7003698006933	36.4075210273797	69.8002879737867	34.5256175068696	74.3390357352404	84.508525191572	45.6987675325746	37.6798672568839	35.8576737902051	42.9778069069487	22.4063601944447
HORVU1Hr1G023250	0.179460247742566	0.151018637451551	0.234332577996018	0.183815428153661	0.267189379724236	0.149825189413085	0	0.325005812881467	0.0979003982465853	0.0428542216995801	0.123844898462262	0.146298017822241	0.16274284624904	0.10055640361944	0.132669237993423
HORVU1Hr1G023260	112.78079569244	91.315936112371	81.5063843347328	86.3779332798746	65.0415290071569	69.8827490619605	79.8968179231723	59.3010606272953	62.7541552760612	74.7163355332179	67.9289268065506	62.8918923282502	54.6635138012053	60.7964016283134	59.1262570657354
HORVU1Hr1G023270	98.3242757353995	80.9124299768198	71.8022587518388	74.9966946866937	56.7014033686218	59.6518289848955	70.5298060337134	52.150932743903	56.8311811821427	65.2669796484605	59.9409308557347	56.1134175024863	48.2622951820764	54.2803466737737	52.7433926156074
HORVU1Hr1G023280	0.578260798281603	0.419496215143197	0.179195500820485	0.245087237538215	0.305359291113413	0.428071969751672	0.175084334382408	0.27500491859201	0.277384461698658	0.17141688679832	0.350893878976409	0.178808688449406	0.216990461665387	0.341891772306096	0.250597449543132
HORVU1Hr1G023320	24.1872533901926	28.3915038408916	27.7339498192935	22.685887424631	18.1688778212481	20.7614905329561	17.9461442741968	21.4753840973215	14.7013764700289	14.0561847174623	14.0563959754667	15.6051219010391	18.932417780305	17.8387060020887	21.3744883433848
HORVU1Hr1G023350	1.45562200946748	1.66120501196706	2.23305162560912	2.9104109457663	4.38953980975531	4.06668371264088	2.21773490217717	3.87506930743287	2.51277688832902	2.46411774772586	3.21996736001881	3.54366309836096	4.66529492580581	3.03680338930709	4.56971819755123
HORVU1Hr1G023460	0	0.0167798486057279	0.0413528078816503	0.183815428153661	0.438953980975531	0.342457575801338	0.0583614447941361	0.0750013414341846	0.587402389479512	0.578531992944332	0.701787757952817	0.357617376898812	0.506311077219235	0.663672263888304	0.368525661092841
HORVU1Hr1G023480	29.6308809050504	43.8457444067669	44.0958774711331	48.8642679841816	41.6624582812862	37.263664966883	25.1246019838756	35.3006313683562	34.7709581105789	30.9193209562471	31.1469919632589	44.6696614417243	39.6911719462936	32.7210537377658	41.2601330159544
HORVU1Hr1G023500	49.7104886246909	41.2952074186963	39.1886776025106	31.4477561666222	26.0891344345022	29.0018759506758	23.5196622520368	21.7753894630583	31.621828633647	27.2124307792334	26.2964001068203	28.0729640865567	33.4165310964695	29.1010232074659	27.7868348464002
HORVU1Hr1G023510	50.3485695055534	41.9160618171082	33.1511676517897	19.8520662405954	19.9056087894556	21.8530740558229	8.87093960870868	15.8502834897577	22.3702409993447	22.0270699535842	22.1063143755137	18.6936356106197	26.9610648619243	18.8241587575592	18.632657424854
HORVU1Hr1G023520	3.44962476216267	2.3491788048019	2.8257752052461	1.43988752053701	8.9699291764565	1.62667348505635	2.80134935011853	6.12510955045841	1.3053386432878	2.09985686327943	12.2193633149432	5.10417528846486	42.8917812558581	27.2306741001444	48.6159052113675
HORVU1Hr1G023630	48.6536671657624	53.2088999287631	48.6998234152902	46.474667418184	39.0287343954331	40.452801141533	42.049420974175	40.4007225858808	25.9762390014273	29.697975637809	33.0872287058343	32.8357773334364	36.6894705599224	35.2550751089757	43.3238767180744
HORVU1Hr1G023650	51.1860506616853	40.2548568051412	35.0396125450517	16.160439725176	27.4250813331234	36.0008526561156	81.939468490967	63.1761299347282	43.4677768214839	93.593620191883	82.5013431922768	23.3264061749907	25.0262332454079	47.4223999469279	60.276057128345
HORVU1Hr1G023660	74.3962427030573	66.4314206300766	61.2159399341363	55.0220848273292	41.4334388129512	50.8335464080111	59.9080230811807	47.5008495749836	46.0295039089362	59.3316699430687	49.8682124474708	51.6594556265648	55.9835391096697	50.8413176699889	58.374464717106
HORVU1Hr1G023670	22.9709117110485	20.1861578726906	18.0298242363995	23.6202825177454	22.2148884285008	21.7460560633849	21.2727466274626	20.0253581629273	18.6663425990156	21.4271108497901	18.3909674216459	17.7995921683727	18.1187035490598	17.5772593526781	18.5442112661917
HORVU1Hr1G023690	10.3887543415419	13.8433750997255	16.6927501148928	16.8803834854445	16.317637118873	16.8232284112407	26.145927267773	26.950482022017	12.2212330477821	11.9563278541829	18.122636808311	16.6454633611083	17.1422464715655	16.2298035441776	16.3477983260784
HORVU1Hr1G023710	0.0398800550539036	0.587294701200475	1.03382019704126	1.3939336634986	1.73673096820753	0.984565530428846	0.029180722397068	1.40002504010478	0.587402389479512	0.299979551897061	1.0733224533396	1.3817035016545	1.22961261610386	0.563115860268864	1.37091545926537
HORVU1Hr1G023720	0.0398800550539036	0.167798486057279	0.192979770114368	0.107225666422969	0.190849556945883	0.192632386388252	0	0.150002682868369	0.114217131287683	0.192843997648111	0.144485714872639	0.113787347195077	0.144660307776924	0.040222561447776	0.132669237993423
HORVU1Hr1G023730	2.25322311054556	3.69156669326013	3.88716394087513	5.26937560707162	4.38953980975531	5.65055000072207	3.09315657408921	4.37507825032743	4.06286652723329	3.25692084916809	3.26124899283956	4.30766385809933	4.44830446414042	3.92169974115816	4.37808485378295
HORVU1Hr1G023750	0.0199400275269518	0.0167798486057279	0	0.0153179523461384	36.0514813070773	0	0	0	1.19112151200012	0.814230212292022	11.7652653539149	8.89166841652955	6.65437415773852	2.15190703745602	3.09561555317986
HORVU1Hr1G023820	0.618140853335507	0.55373500398902	0.551370771755337	0.398266760999599	0.343529202502589	0.406668371264088	0.204265056779476	0.500008942894564	0.244750995616463	0.364260884446431	0.350893878976409	0.130042682508659	0.361650769442311	0.382114333753872	0.191633343768277
HORVU1Hr1G023860	1.25622173419796	1.24170879682386	0.96489885057184	1.21011823534494	0.763398227783532	1.1771979168171	0.933783116706177	0.650011625762933	1.25638844416451	1.30705376183719	0.701787757952817	1.1053628013236	0.867961846661546	1.26701068560494	0.766533375073109
HORVU1Hr1G023940	0.777661073551121	0.889331976103577	1.00625165845349	0.750579664960783	0.877907961951061	0.749125947065426	1.07968672869152	1.62502906440733	1.3053386432878	1.19991820758824	1.81639184411317	0.796511430365536	0.705219000412506	1.06589787836606	1.2972103270468
HORVU1Hr1G023960	0.139580192688663	0.520175306777564	1.40599546797611	2.84913913638175	3.32078229085836	3.06071458372445	0.0875421671912041	1.50002682868369	3.13281274389073	1.30705376183719	0.825632656415079	0.991575454128524	1.24769515457597	0.643560983164416	0.456971819755123
HORVU1Hr1G024000	1.83448253247957	2.63443623109928	3.14281339900542	3.58440084899639	3.64522653766636	3.31755776557546	3.35578307566282	2.85005097449901	3.70389840032914	2.24984663922796	2.82779184822165	3.67370578086962	3.2548569249808	3.27813875799374	3.243025817617
HORVU1Hr1G024040	0.239280330323422	0.285257426297374	0.248116847289902	0.29104109457663	0.305359291113413	0.278246780338587	0.437710835956021	0.225004024302554	0.0489501991232926	0.235698219347691	0.165126531283016	0.178808688449406	0.126577769304809	0.080445122895552	0.147410264437136
HORVU1Hr1G024060	4.24722586324074	3.75868608768304	4.36961336616105	3.76821627715005	3.51163184780425	3.25334697011271	4.98990352989863	3.37506036453831	5.79244022958963	7.41378035402736	7.16236329440081	6.06324007196622	4.35789177177985	5.04793146169589	3.98007713980268
HORVU1Hr1G024070	10.328934258961	9.07789809569878	10.6965929720535	19.1933942897114	23.455410548649	30.328899056906	22.8193249145072	33.7006027510936	13.8039561527685	13.2848087268698	12.8798694400752	11.0861386838632	15.0627545472722	15.4655748766699	17.0258855424892
HORVU1Hr1G024090	5.4635675423848	4.24530169724915	4.35582909686717	4.61070365618767	3.53071680349883	3.29615416708787	3.29742163086869	3.50006260026195	5.27030477227451	4.49969327845591	4.23136736412728	4.66528123499814	3.09211407873176	4.0222561447776	3.53784634649127
HORVU1Hr1G024100	2.1934030279647	2.26527956177326	2.13656174055193	2.43555442303601	2.99633804405036	3.18913617464996	2.68462646053026	2.10003756015717	3.344930273425	3.92116128551158	3.03420001232542	3.05600303895348	2.35073000137502	2.95635826641154	2.32908217810675
HORVU1Hr1G024140	13.4993986357464	10.5880844702143	11.3031008209844	11.3659206408347	12.4433911128716	13.8909354184418	8.92930105350282	8.80015739494432	13.053386432878	9.7064812149549	8.44209391184418	8.64783838682582	8.46262800495007	9.69363730891402	8.01911838538021
HORVU1Hr1G024150	1.73478239484481	1.91290274105298	1.9160134318498	2.06792356672869	1.92758052515342	1.47684829564327	0.962963839103245	1.97503532443353	1.56640637194536	1.43561642693593	1.44485714872639	1.69055487261257	1.97099669346059	1.74968142297826	1.90159241123906
HORVU1Hr1G024170	85.0043373473956	87.188093355362	91.1415885711573	93.9143658341747	74.5649218987565	88.3112473597699	56.4938785607237	69.1012359080287	63.3415576655407	61.1529743653008	61.6954002506168	67.88228026952	62.1135196517169	67.0510099334426	59.5095237532719
HORVU1Hr1G024180	0	0.0167798486057279	0.0413528078816503	0	4.86666370212001	0.128421590925502	7.58698782323769	4.40007869747216	0.244750995616463	0.278552441047271	4.56162042669331	4.37268519935366	13.6523165464472	47.4626225083757	58.8166955104174
HORVU1Hr1G024190	32.5421249239854	37.3183832991388	39.850322528617	36.8396753924629	40.6700405851676	33.4324208376056	22.5275176905365	32.4505803938572	31.7034122988525	29.4194231967618	28.7526572596551	44.2632780588848	31.4093693260647	25.9234408530916	34.3171095609653
HORVU1Hr1G024210	13.638978828435	11.3263978088663	11.0136311658129	10.7685204993353	12.328881378704	13.3558454562522	10.1840721165767	10.0751801993255	13.1839202972068	11.3777958612385	9.35028983390077	8.82664707527523	8.8423613128645	9.87463883542901	7.66533375073109
HORVU1Hr1G024220	3.8085452576478	4.36276063748925	3.96986955663843	3.95203170530371	4.2368601641986	3.61720814440163	2.53872284854492	2.90005186878847	3.81811553161683	3.96401550721116	3.4057347077122	4.4214512052944	3.9600759253933	3.84125461826261	4.1127463777961
HORVU1Hr1G024240	57.0882988096631	69.921629140068	66.219629687816	63.7839535693204	59.3923821215588	56.2058496283945	32.7699512519074	39.2507020172233	55.6563764031837	57.8531992944332	51.9735757213292	52.1633710212858	49.4738252597081	50.4189807747872	47.4218820694267
HORVU1Hr1G024280	0.0997001376347591	0.369156669326013	0.261901116583785	0.0306359046922768	0.171764601251295	0	0	0	0.0163167330410975	0.0642813325493702	0.0412816328207539	0.146298017822241	0	0.040222561447776	0.0294820528874273
HORVU1Hr1G024390	22.4325309678208	16.276453147556	15.1764804925657	15.6396293454073	12.9014300495417	12.6495267061619	9.92144561500313	11.8002110523117	24.2140318329888	21.5985277365884	15.3774082257308	11.2649473723126	12.0068055454847	14.3795657175799	10.5693159601427
HORVU1Hr1G024400	207.296526170191	229.73290726102	287.787974317698	311.276109625879	279.613685881413	342.607400990751	320.37515119741	415.28242752108	186.451308460622	162.224656243761	166.344339451228	229.216483256825	174.207175640361	188.925371120204	115.186380631178
HORVU1Hr1G024420	4.64602641377977	5.13463367335273	7.62270091951754	8.70059693260662	7.19502829685979	4.81580965970631	7.35354204406114	5.57509971327439	10.2305916167682	10.0921692102511	9.55669799800454	10.9235853307274	6.96177731176448	8.80874095706294	9.71433642640728
HORVU1Hr1G024460	0.498500688173796	0.654414095623387	0.620292118224755	0.520810379768706	0.744313272088943	0.492282765214423	0.583614447941361	0.250004471447282	0.815836652054877	0.921365766540973	0.516020410259424	0.585192071288965	0.723301538884622	0.70389482533608	0.560159004861118
HORVU1Hr1G024510	5.22428721206138	3.40630926696276	3.85959540228736	4.53411389445697	4.90483361350919	5.41511041735865	6.18631314817842	5.20009300610347	4.82975298016487	4.71396438695381	3.88047348515087	5.41302665942293	5.13544092608081	5.20882170748699	5.66055415438603
HORVU1Hr1G024540	2.1934030279647	2.56731683667636	1.81952354679261	1.66965680572909	2.6146389301586	1.71228787900669	1.95510840060356	2.35004203160445	3.83443226465792	6.51384169833618	5.65558369644329	2.94221569175841	4.32172669483561	5.14848786531533	7.87170812094308
HORVU1Hr1G024550	5.04482696431881	4.73191730681526	4.2455549425161	5.28469355941776	5.2101929046226	4.88002045516906	4.05612041319246	4.85008674607727	4.45446812021963	5.12107949309982	4.70610614156595	5.2504733062871	4.95461554135966	4.80659609300923	5.60159004861118
HORVU1Hr1G024580	81.4151323925443	62.957991968691	69.9138138585768	79.5461265334968	62.579569722555	88.4396689506954	61.8631314817842	75.701353954237	44.4630975369908	37.861704871579	32.5918491119852	39.0128047525977	32.3496613266147	36.1198601801028	23.6298653892729
HORVU1Hr1G024640	5.30404732216919	4.01038381676896	4.28690775039775	6.28036046191675	17.9207733972184	9.37477613756162	13.8316624162102	10.8001931665226	18.7805597303033	24.7483130315075	35.3783593273861	23.0663208099734	19.7822970884944	26.567001836256	30.9414145053549
HORVU1Hr1G024660	8.63403191917014	6.71193944229115	7.73297507386861	8.68527898026049	9.71424244854544	6.99897670543984	6.91583120810512	6.00010731473477	7.79939839364463	5.89245548369227	5.90327349336781	7.75379494457879	13.9054720850569	8.5472943076524	10.4071646692618
HORVU1Hr1G024670	14.5163400396209	11.7626738726152	13.2742513300097	14.5980085858699	13.9892725241332	11.5365395848076	9.3086504446647	9.32516678498362	12.3191334460286	8.57084433991602	9.06131840415549	12.337799503009	18.7515923955838	12.6097730138778	14.4314648883956
HORVU1Hr1G024700	35.19414858507	25.404690789072	26.2866015434357	25.9179753696662	19.886523833761	25.0422102304728	40.0943125735715	25.8754627947937	23.4797788461394	23.5269677130695	23.8607837703958	19.8965304238248	24.3752618604118	26.7077808013233	22.0673165862393
HORVU1Hr1G024710	217.047199630871	230.857157117604	199.610003644726	142.181233676857	106.284118263162	125.446490735727	136.419877206293	149.802679291211	120.939625300615	148.575586632444	122.358759680715	117.591095658455	138.512244696405	129.516647861839	134.954097092198
HORVU1Hr1G024740	51.5250311296435	34.9524246457311	38.1686416747632	38.8616451021532	29.6580211493902	32.7475056860029	23.3445779176544	23.0004113731499	31.7523624979758	29.7622569703584	24.8102613252731	20.0590837769606	21.445890627929	21.8408508661424	16.215129088085
HORVU1Hr1G024810	17.5871042787715	11.9808119044897	13.6877794088263	14.9196855851388	15.8405132265083	16.9944571991414	18.7923852237118	14.075251742482	18.9600437937553	19.5629522058583	15.8727878195799	15.9139732719971	13.7246467003357	18.3414880201859	14.6378392586076
HORVU1Hr1G024860	0.199400275269518	0.0503395458171836	0.0413528078816503	0.336994951615045	0.171764601251295	0.620704356139924	1.60493973183874	1.30002325152587	0.163167330410975	0.10713555424895	0.330253062566032	0.130042682508659	0.506311077219235	0.341891772306096	0.339043608205413
HORVU1Hr1G024870	37.3277315304538	29.2472761197837	35.5771990475131	49.0940372693736	17.6917539288833	28.1885392081476	33.9079994253931	38.075681001421	72.5115616346375	54.1891633391191	41.7976532310134	61.6564868444179	34.0494199429936	37.5678723922228	33.5358351594485
HORVU1Hr1G024880	0.338980467958181	0.151018637451551	0.096489885057184	0.122543618769107	0.190849556945883	0.23543958336342	0.350168668764816	0.125002235723641	0.0815836652054877	0.10713555424895	0.309612246155655	0.130042682508659	0.108495230832693	0.20111280723888	0.176892317324564
HORVU1Hr1G024890	44.5260814676834	33.9959732752047	34.1574193102431	37.8047063902696	35.0018087438749	58.1321734922771	64.5185772199174	54.9509828241126	26.0578226666328	28.4337760976714	28.4017633806787	29.8610509710508	20.5236811658511	24.4150947988	15.1390341576939
HORVU1Hr1G025010	0.378860523012085	0.419496215143197	1.28193704433116	0.842487379037613	0.839738050561885	0.642107954627508	0.0875421671912041	0.500008942894564	0.815836652054877	0.428542216995801	0.619224492311309	0.861532771619866	0.415898384858657	0.422336895201648	0.530676951973691
HORVU1Hr1G025020	3.78860523012085	4.91649564147827	3.68039990146688	3.41590337318887	2.34744955043436	3.16773257616237	2.01346984539769	3.02505410451211	5.9556075600006	10.713555424895	7.82286941953287	8.22519966867268	4.10473623317023	4.46470432070314	3.59681045226613
HORVU1Hr1G025030	0	0.0335596972114557	0.0137842692938834	0	0.171764601251295	0	0.0875421671912041	0.100001788578913	0	0	0.288971429745278	0.146298017822241	1.13919992374328	0.60333842171664	1.34143340637794
HORVU1Hr1G025060	56.1112374608424	70.6431626301143	77.9086900490292	41.8792817143424	49.9071591413484	81.0982346694543	173.566936817761	131.402350192691	92.7932608047217	115.170720817622	116.682535167861	69.1989624299201	54.5911836473168	89.2940864140627	102.641767127578
HORVU1Hr1G025090	48.0754063674809	60.5249139208604	64.8412027584277	35.9818700610792	43.8190582747747	75.8971602369714	167.117997168009	124.827232593628	80.5230775578164	101.05025476761	102.254604497008	60.0797193190004	47.7740666433293	77.9513240857899	91.8218537178922
HORVU1Hr1G025100	0.43868060559294	0.335596972114557	0.84084042692689	0.367630856307322	0.305359291113413	0.149825189413085	0.612795170338429	0.55000983718402	0.554768923397317	0.921365766540973	1.15588571898111	0.5526814006618	0.470146000275004	0.764228667507744	0.751792348629395
HORVU1Hr1G025110	0.21934030279647	0.771873035863482	0.96489885057184	0.336994951615045	0.152679645556706	0.149825189413085	0.0875421671912041	0.100001788578913	0.212117529534268	0.10713555424895	0.247689796924524	0.308851370958065	0.235073000137502	0.221224087962768	0.353784634649127
HORVU1Hr1G025120	2.05382283527604	2.48341759364772	3.07389205253601	1.21011823534494	1.39320176570495	0.963161931941262	1.07968672869152	1.47502638153896	2.07222509621939	2.50697196942544	3.46765715694333	1.3817035016545	1.44660307776924	2.53402137120989	3.75896174314698
HORVU1Hr1G025150	0.458620633119892	0.251697729085918	0.261901116583785	0.1991333804998	0.209934512640471	0.192632386388252	0.116722889588272	0.100001788578913	0.358968126904146	0.321406662746851	0.371534695386786	0.260085365017318	0.198907923193271	0.261446649410544	0.117928211549709
HORVU1Hr1G025160	1.67496231226395	2.58409668528209	3.66661563217299	4.59538570384153	4.4086247654499	2.6112390154852	2.21773490217717	2.32504158445972	2.87174501523317	2.87123285387187	3.36445307489145	4.32391919341291	3.79733307914426	2.513910090486	3.22828479117328
HORVU1Hr1G025250	0.0997001376347591	0.117458940240095	0.317038193759319	0.122543618769107	1.35503185431577	0.128421590925502	0.116722889588272	0.250004471447282	0.0652669321643902	0.0857084433991602	0.412816328207539	0	4.24939654094715	1.20667684343328	1.79840522613306
HORVU1Hr1G025300	0.139580192688663	0.134238788845823	0.165411231526601	0.183815428153661	0.133594689862118	0.29965037882617	0.116722889588272	0.125002235723641	0.244750995616463	0.14998977594853	0.0412816328207539	0.146298017822241	0.0723301538884622	0.060333842171664	0.0737051322185681
HORVU1Hr1G025340	51.724431404913	48.3091841358905	59.1896523479355	46.3521237994149	33.0360583073323	41.6728062553253	53.4590834314286	45.4008120148264	37.2021513337024	36.7046408856904	34.3669593232777	36.2981637552294	28.0460171702512	30.7300369461009	20.5342498360931
HORVU1Hr1G025360	9.09265255229003	9.29603612757324	10.4622603940575	11.8867310206034	10.1722813852156	10.5733776528663	9.68799983582659	9.00016097210215	9.41475496471328	9.72790832580469	9.143881669797	8.56656171025791	8.31796769717315	8.74840711489128	7.4589593805191
HORVU1Hr1G025370	17.6668643888793	16.3435725419789	22.2478106403279	35.0474749679647	11.9853521762014	15.0467297367713	23.3445779176544	21.7753894630583	10.3937589471791	7.9708852361219	10.8157877990375	13.9958437049944	6.87136461940391	7.32050618349523	4.51075409177637
HORVU1Hr1G025390	23.608992591911	24.1965416894596	34.295262003182	56.1402953485973	21.9858689601657	30.5643386402694	31.5443609112305	44.0257874218664	16.4799003715085	11.6563483022858	17.0080327221506	19.1325296640864	13.2545007000607	11.5237638547878	6.57449779389628
HORVU1Hr1G025440	3.42968473463571	2.91969365739665	1.7506022003232	2.02196970969027	3.0917628225233	2.63264261397278	5.34007219866345	3.60006438884086	3.52441433687707	4.15685950485927	5.84135104413668	4.53523855248948	3.07403154025964	3.72058693391928	4.34860280089552
HORVU1Hr1G025450	2.57226355097679	2.43307804783054	2.83955947453999	3.78353422949619	3.79790618322307	3.83124412927746	5.98204809139895	3.95007064886705	3.85074899769902	4.07115106146011	4.08688164925464	3.9663018165141	4.3036441563635	4.04236742550149	4.42230793311409
HORVU1Hr1G025470	0.737781018497218	0.738313338652026	0.868408965514656	1.17948233065266	1.43137167709412	1.07017992437918	1.28395178547099	1.10001967436804	1.90905776580841	1.15706398588866	1.36229388308488	1.56051219010391	1.44660307776924	1.12623172053773	1.42987956504022
HORVU1Hr1G025480	4.16746575313293	3.42308911556849	3.58391001640969	3.84480603888074	3.2635274237746	3.01790738674929	3.76431318922178	3.85006886028814	2.10485856230158	2.95694129727103	3.81855103591974	3.52740776304737	2.80279346317791	2.6748003362771	3.52310532004756
HORVU1Hr1G025530	17.7665645265141	17.4846022471684	15.1764804925657	6.58671950883952	9.69515749285085	5.99300757652341	0.787879504720837	5.20009300610347	2.72489441786329	2.1641381958288	9.70118371287718	4.22638718153142	3.45376484817407	3.05691467003098	2.5944206540936
HORVU1Hr1G025570	0.638080880862458	0.838992430286393	0.565155041049221	0.153179523461384	0.610718582226825	0.513686363702006	0.029180722397068	0.150002682868369	0.0652669321643902	0.0428542216995801	0.165126531283016	0.666468747856877	0.126577769304809	0.160890245791104	0.132669237993423
HORVU1Hr1G025600	9.61109326799078	11.9975917530954	12.7504490968422	11.50378221195	11.0120194357774	11.4509251908572	8.31650588316439	9.25016544354943	9.41475496471328	7.79946834932358	6.85275104824516	8.50154036900358	8.67961846661546	7.90373332448798	7.73903888294966
HORVU1Hr1G025660	7.97601101078073	7.36635353791453	8.83571661737928	7.44452484022327	9.69515749285085	9.24635454663612	13.5982166370337	10.9251954022462	8.27258365183646	9.89932521260301	10.1346408574951	9.02171109903821	9.78265331341451	11.4030961704445	12.6183186358189
HORVU1Hr1G025670	50.1691092578108	31.8984921994887	27.1412262396565	27.3731808425494	43.8381432304693	27.5464312535201	33.1784813654664	27.3504891763326	36.5984322111818	40.0472701782576	62.6035961726734	34.8189282416934	38.7508799457436	37.1254242162972	43.2206895329684
HORVU1Hr1G025690	9.65097332304468	9.64841294829352	9.11140200325695	10.508115309451	19.886523833761	16.6734032218276	25.5039513750375	20.6753697886902	11.7969979887135	13.5205069462175	21.4870898832024	17.0355914086343	30.2340043253772	21.1369560408063	36.2629250515355
HORVU1Hr1G025870	1.35592187183272	3.20495108369402	1.6678965845599	0.566764236807122	1.24052212014824	0.963161931941262	1.28395178547099	1.35002414581532	0.685302787726097	0.964219988240553	1.30037143385375	0.845277436306283	1.30194276999232	0.945230194022736	2.01952062278877
HORVU1Hr1G025890	0.279160385377326	0.201358183268734	0.179195500820485	0.0612718093845537	1.12601238598071	0.0856143939503344	0.379349391161884	0.27500491859201	0.0815836652054877	0.17141688679832	0.185767347693393	1.17038414257793	1.60934592401828	0.945230194022736	1.97529754345763
HORVU1Hr1G025910	0.418740578065988	0.838992430286393	1.22679996715563	0.965030997806721	0.89699291764565	0.470879166726839	0.846240949514973	1.1500205686575	0.86478685117817	1.34990798353677	1.38293469949526	2.06442758482496	0.976457077494239	0.844673790403296	1.1940231419408
HORVU1Hr1G025940	1.39580192688663	0.973231219132216	1.5851909687966	1.73092861511364	2.40470441751812	1.0487763258916	1.3714939526622	0.675012072907661	3.344930273425	3.51404617936557	5.13956328618387	3.80374846337827	5.06311077219235	5.16859914603922	5.99959776259145
HORVU1Hr1G025970	0.418740578065988	0.318817123508829	0.275685385877669	0.352312903961184	0.324444246808001	0.321053977313754	0.175084334382408	0.525009390039292	0.668986054684999	0.707094658043072	0.516020410259424	0.292596035644483	0.235073000137502	0.442448175925536	0.16215129088085
HORVU1Hr1G026100	3.86836534022865	3.30563017532839	2.31575724137242	3.26272384972748	2.29019468335059	3.48878655347613	2.04265056779476	4.0750728845907	4.43815138717853	2.42126352602628	1.38293469949526	3.08851370958065	7.10643761954141	11.3226510475489	8.09282351759878
HORVU1Hr1G026130	3.15052434925839	2.73511532273364	2.27440443349077	2.20578513784393	2.4428743289073	2.39720303060936	4.55219269394261	1.9500348772888	2.12117529534268	3.0212226298204	2.78651021540089	3.16979038614856	3.20060930956445	2.99658082785931	3.06613350029243
HORVU1Hr1G026140	3.310044569474	2.78545486855083	2.83955947453999	2.61936985118967	2.50012919599107	2.26878143968386	3.44332524285403	1.90003398299934	2.90437848131536	3.10693107321956	2.93099593027353	3.39736508053871	2.96553630942695	3.3585838808893	4.09800535135239
HORVU1Hr1G026250	0.21934030279647	0.46983576096038	0.716782003281939	0.995666902498997	0.992417696118591	0.941758333453678	0.466891558353089	0.725012967197118	1.20743824504122	0.942792877390763	0.804991840004702	1.2028948132051	0.904126923605777	0.70389482533608	0.692828242854541
HORVU1Hr1G026280	0.139580192688663	0.0838992430286393	0.110274154351067	0.107225666422969	0.286274335418824	0.0214035984875836	0.116722889588272	0.0750013414341846	0.0652669321643902	0.342833773596641	0.103204082051885	0.0650213412543295	0.198907923193271	0.040222561447776	0.132669237993423
HORVU1Hr1G026320	12.6419774520875	20.5720943906224	21.0347949424661	25.4890727039743	59.0679378747508	38.1198089063864	23.9573730879929	60.7010856674001	17.6220716843854	16.6488651302869	28.6288123611929	33.9736508053872	98.8210727501114	56.211029623267	115.864467847589
HORVU1Hr1G026330	4.94512682668405	4.64801806378662	6.89213464694172	5.45319103522528	14.7526707519167	6.24985075837441	13.5106744698425	13.0252329624034	8.76208564306938	10.4778572055473	12.2193633149432	10.4359252713199	26.8525696310916	22.9670825866801	39.4617277898214
HORVU1Hr1G026400	2.29310316559946	1.45984682869832	1.18544715927398	1.3939336634986	1.31686194292659	2.31158863665903	1.60493973183874	1.72503085298625	2.07222509621939	2.22841952837817	1.73382857847167	1.33293749571375	1.08495230832693	1.12623172053773	0.501194899086263
HORVU1Hr1G026430	9.43163302024821	11.0914799283861	9.74547839077559	11.7795053541804	13.0159397837092	14.9397117443334	11.0011323436946	8.72515605351014	9.00683663868585	9.68505410410511	8.13248166568853	8.2089443333591	8.13714231245199	8.86907479923461	9.71433642640728
HORVU1Hr1G026480	14.1574195441358	7.21533490046298	6.54752791459463	13.1274851606406	13.2640442077389	14.854097350383	8.92930105350282	7.47513369627373	14.3424083431247	12.7062767339255	8.66914289235833	8.40400835712208	5.46092661857889	6.07360677861418	3.06613350029243
HORVU1Hr1G026510	0.87736121118588	0.520175306777564	0.372175270934853	0.1991333804998	0.11450973416753	0.128421590925502	0.437710835956021	0.100001788578913	0.212117529534268	0.278552441047271	0.227048980514147	0.0812766765679118	0.216990461665387	0.160890245791104	0.16215129088085
HORVU1Hr1G026520	34.1971472087224	18.4913931635121	15.2040490311534	5.45319103522528	4.52313449961742	4.51615928088014	5.31089147626638	5.77510329043221	13.1676035641657	12.4062971820284	14.4692123036743	13.7195030046635	23.3445571675012	12.8913309440122	19.6055651701391
HORVU1Hr1G026530	1.05682145892845	1.19136925100668	0.827056157633006	0.505492427422568	3.01542299974495	2.71825700792312	2.8305300725156	1.30002325152587	0.456868525150731	0.899938655691183	0.454097961028293	0.487660059407471	1.60934592401828	2.49379880976211	2.55019757476246
HORVU1Hr1G026580	3.94812545033646	3.12105184066538	3.28065609194426	4.01330351468827	3.81699113891766	4.15229810659122	3.88103607881005	3.85006886028814	4.48710158630182	4.22114083740864	4.72674695797633	4.95787727064262	2.94745377095483	4.66581712794202	4.26015664223324
HORVU1Hr1G026590	39.4812545033646	31.6971340162199	31.5384081444053	41.833327857304	35.9178866172152	43.8345697025712	31.6319030784218	26.7254779977144	27.4610617081672	26.7196072296882	18.0194327262591	16.1415479663873	18.1729511644761	24.3346496759045	12.0581596309577
HORVU1Hr1G026620	0.418740578065988	0.285257426297374	0.372175270934853	0.551446284460983	0.362614158197178	0.321053977313754	0.408530113558952	0.525009390039292	0.342651393863048	0.514250660394961	0.20640816410377	0.61770274191613	0.307403154025964	0.30166921085832	0.339043608205413
HORVU1Hr1G026650	23.190252013845	15.2025428367894	13.2191142528342	11.9633207823341	15.3061344670598	21.2323696996829	36.7677102203057	32.4505803938572	7.9462489910145	8.97795944606204	13.9738327098252	10.4521806066335	13.5438213156145	10.5181998185934	11.7485980756398
HORVU1Hr1G026750	12.82143769983	14.8333861674634	17.7541388505219	21.8127641409011	21.7377645361361	20.5688581465678	7.79125288001716	12.4252222309299	24.08349796866	15.8560620288446	13.8087061785422	16.0440159545058	22.9105762441704	19.6688325479625	24.4111397907898
HORVU1Hr1G026780	33.6986465205486	28.1733658090171	17.9195500820485	39.0454605303068	41.2235043003107	53.2949602340832	21.9147225201981	22.5504033245448	25.7967549379752	18.5558779959182	12.1368000493017	10.0295418884803	12.1153007763174	15.3851297537743	7.60636964495623
HORVU1Hr1G026800	6.56026905636715	5.85616716339903	5.32072794743901	5.11619608361023	7.04234865130308	6.50669394022542	12.1099997947832	7.12512743624754	5.87402389479512	8.05659367952106	9.12324085338662	6.12826141322055	6.6362916192664	8.10484613172686	7.4589593805191
HORVU1Hr1G026820	0.0797601101078073	0.184578334663007	0.151626962232718	0.122543618769107	0.133594689862118	0.23543958336342	0.233445779176544	0.225004024302554	0.0652669321643902	0.17141688679832	0.103204082051885	0.0650213412543295	0.16274284624904	0.060333842171664	0.103187185105995
HORVU1Hr1G026840	14.077659434028	19.2464863507699	54.9165288668316	37.957885913731	14.4091415494142	13.9551462139045	19.2300960596678	20.4253653172429	10.7690438071244	14.3561642693593	22.1269551919241	32.4944152918512	13.4172435463097	13.2332227163183	11.9254903929643
HORVU1Hr1G026850	0.378860523012085	0.520175306777564	0.496233694579804	0.965030997806721	0.419869025280942	0.278246780338587	0.029180722397068	0.600010731473477	0.456868525150731	0.492823549545171	0.516020410259424	0.829022100992701	0.632888846524044	0.261446649410544	0.692828242854541
HORVU1Hr1G026860	2.71184374366545	2.03036168129307	1.97115050902533	0.796533521999198	1.58405132265083	2.14035984875836	5.0190842522957	3.42506125882776	3.10017927780853	4.84252705205255	4.97443675490085	1.08910746601002	1.24769515457597	2.97646954713542	3.65577455804098
HORVU1Hr1G026870	14.1374795166088	18.6256319523579	17.3543950409992	9.22140731237533	10.9929344800829	11.8789971606089	23.8114694760075	29.9005347850949	18.7152927981389	25.7553872414477	31.8487797212117	12.0614588026781	11.2473389296559	20.4933950576419	35.9533634962175
HORVU1Hr1G026900	31.5650635751647	31.445436287134	28.1336936288161	14.4907829194469	27.7495255799314	27.910292427809	47.2144088384561	47.6758527049967	29.5332868043866	52.2392962517882	64.6883186301214	23.8303215697117	33.5069437888301	55.2657994292442	74.6485579109658
HORVU1Hr1G026920	5630.6250930056	4834.76099891976	4933.18321624147	2299.60759596403	3312.49942008691	4124.28079617097	9248.80078302832	7756.16372262762	5697.50947675652	9285.24564275887	10343.3814338532	3499.26977761956	4106.14667117105	7289.27336453103	10730.8776099658
HORVU1Hr1G026940	3705.37555522335	3126.94156752599	3179.98957329103	1456.36963726146	2007.75642402638	2612.65165298538	6154.44779932082	5133.11680820274	3712.98682063303	6196.63474931589	6772.2725050611	2196.22584354749	2431.90251657635	4526.00350434955	6725.16582517748
HORVU1Hr1G026960	105.881546168114	83.4797468134961	84.0978269619828	35.0627929203108	46.9871609200764	73.4571500093869	165.192069489802	118.127112758841	94.9307528331055	197.407972259116	196.356086511916	52.9923931222785	58.9129103421524	113.085731510422	177.997894307842
HORVU1Hr1G026990	1062.42460666352	861.678785601337	846.960642493374	410.291353591318	662.247962602214	811.924105027996	1658.57389960455	1334.62387037417	994.798580049635	1713.99745109641	1869.52130555348	635.746164114206	796.752810158355	1372.59490940536	1965.1704582908
HORVU1Hr1G027000	4357.23499510693	3777.81511509357	3824.43173131867	1816.98487139425	2719.58710152314	3266.51018318257	7038.97385662075	6094.85900941329	4363.32284945206	7098.58755342695	7989.39952633179	2804.87436369395	3423.006450233	5895.80294573428	8565.84831515111
HORVU1Hr1G027010	5.04482696431881	5.78904776897611	5.52749198684726	2.03728766203641	2.99633804405036	4.40914128844222	9.1335661102823	9.25016544354943	5.84139042871292	10.006460766852	10.1140000410847	3.34859907459797	3.85158069456061	6.8780580075697	11.9991955251829
HORVU1Hr1G027020	10.3688143140149	7.13143565743434	7.89838630539521	3.15549818330452	3.56888671488801	7.64108466006735	28.4512043371413	10.8001931665226	9.12105376997353	13.0062562858226	12.5496163775092	4.4214512052944	3.86966323303273	8.06462357027909	11.5717057583152
HORVU1Hr1G027070	126.200434218078	109.756989730066	113.485889096542	53.5362434497538	87.9053059292737	92.1210878905598	173.245948871393	150.002682868369	110.105314561326	214.3139627196	215.324996793053	89.6156635837796	130.212359537704	189.568932103368	293.832880102544
HORVU1Hr1G027080	24.5062938306238	26.5457204942615	26.4244442363745	11.5344181166422	24.4096583333784	25.1706318213983	40.0067704063803	40.5007243744597	27.607912305537	48.382416298826	54.4091920577537	18.0434221980764	26.0388553998464	40.7856773080449	58.5218749815431
HORVU1Hr1G027090	73.2197810789671	63.4949471240743	49.899054843858	22.793113091054	33.7231167123375	48.2223073925259	82.0270106581582	115.827071621526	61.8404182257597	122.005969178705	149.191821014205	38.0049739631556	43.2353494868283	81.2897966859553	121.274424552432
HORVU1Hr1G027120	206.758145426963	181.121685850227	204.779104629932	94.0369094529438	114.872348325727	150.231857784349	357.055319250524	308.005508823051	238.795388056463	349.04763574308	394.342797520252	143.778440848636	151.477424780912	268.948157120554	436.231195548817
HORVU1Hr1G027140	2.31304319312641	2.06392137850453	2.28818870278465	1.36329775880632	1.62222123404	1.96913106085769	4.17284330278073	4.20007512031434	2.90437848131536	4.0925781723099	4.82995104002821	1.56051219010391	1.93483161651636	3.53958540740429	5.89641057748545
HORVU1Hr1G027170	9.77061348820639	8.72552127497849	8.71165819373433	4.33498051395717	5.17202299323343	6.54950113720058	14.4736383089457	18.4753304399541	10.1490079515627	16.841709127935	19.4642898749855	6.42085744886504	6.34697100371256	12.0064345921611	17.7481958382312
HORVU1Hr1G027180	5.18440715700747	4.71513745820953	5.08639536944299	2.57341599415125	2.46195928460189	3.36036496255063	8.19978299357612	10.5001878007858	5.82507369567182	10.2850132078992	10.6093796349338	3.82000379869186	3.2548569249808	6.65683391960693	10.1713082461624
HORVU1Hr1G027190	0.319040440431229	0.503395458171836	0.330822463053202	0.168497475807523	0.133594689862118	0.256843181851003	0.583614447941361	0.950016991499671	0.489501991232926	0.878511544841392	0.88755510564621	0.227574694390153	0.415898384858657	0.643560983164416	0.913943639510245
HORVU1Hr1G027220	10.1295339836915	15.1522032909723	14.5148355664593	7.3372991738003	8.91267430937273	9.22495094814853	16.5746503215346	22.2253975116634	14.4239920083302	19.8200775360558	24.4387266298863	9.769456523463	9.04126923605777	15.3449071923265	28.5533682214733
HORVU1Hr1G027230	4.78560660646844	4.02716366537469	3.73553697864241	1.73092861511364	2.90091326557742	4.53756287936772	9.2211082774735	6.92512385908971	5.12345417490463	8.65655278331518	9.76310616210831	2.50332163829168	2.74854584776156	6.73727904250248	8.04860043826764
HORVU1Hr1G027250	1.09670151398235	0.855772278892121	0.592723579636988	0.306359046922768	0.706143360699767	1.00596912891643	1.3714939526622	1.02501833293386	1.07690438071244	1.32848087268698	1.69254694565091	0.5526814006618	1.03070469291059	1.56867989646326	1.99003856990134
HORVU1Hr1G027280	0.697900963443314	0.838992430286393	0.702997733988055	0.413584713345737	0.477123892364707	0.791933144040593	1.86756623341235	1.65002951155206	1.15848804591793	1.60703331373425	1.56870204718865	0.633958077229712	0.379733307914426	1.20667684343328	1.82788727902049
HORVU1Hr1G027300	239.200570213314	192.515203053516	199.582435106138	94.4658121186357	136.400178349223	162.688752104123	391.984643959815	350.356266286221	240.720762555312	366.725002194157	406.541520018785	142.331716005727	159.813475016557	300.341866330543	435.951116046387
HORVU1Hr1G027310	2.61214360603069	1.76188410360143	1.7506022003232	0.934395093114444	2.1184300820993	1.88351666690736	4.2020240251778	2.85005097449901	2.25170915967146	3.64260884446431	4.87123267284897	1.36544816634092	2.22415223207021	4.14292382912093	4.15696945712724
HORVU1Hr1G027340	204.006421628244	167.83204575449	173.378539178466	86.8068359455664	146.057165930684	170.201415173265	308.819585128171	328.755879953176	235.662575312572	316.628417027348	352.916678984625	135.049325785242	161.947214556267	265.147125063739	383.812105514972
HORVU1Hr1G027350	102.57150159864	82.0870193792207	80.4036427912221	44.1616566139171	86.9701431002388	95.9523320198373	140.300913285103	170.903056681362	133.927744801329	147.418522646556	167.933682314827	71.1008366616093	95.8374539022124	136.81704276461	190.586730890774
HORVU1Hr1G027360	3.34992462452791	3.72512639047159	3.45985159276474	1.73092861511364	1.87032565806965	2.56843181851003	6.3030360377667	6.42511491619515	4.14445019243878	6.8995296936324	8.31824901338192	2.53583230891885	2.89320615553849	5.43004579544976	8.90357997200303
HORVU1Hr1G027400	1.81454250495262	1.07391031076658	0.937330311984074	1.77688247215206	1.52679645556706	1.15579431832951	0.671156615132565	1.00001788578913	2.20275896054817	1.37133509438656	1.38293469949526	1.6580442019854	2.69429823234522	2.41335368686656	2.31434115166304
HORVU1Hr1G027420	86.6593596321326	89.100996096415	119.289066469267	112.877990838694	77.4658351643339	76.4536537976486	75.1987216172443	81.4514567975245	52.2951293967176	60.831567702554	77.423702355324	99.3363541013019	86.2898735889354	72.8028362204746	69.9903935547523
HORVU1Hr1G027490	4.06776561549817	4.3963203347007	3.33579316911979	2.86445708872788	2.65280884154777	2.67544981094795	4.49383124914848	2.90005186878847	2.39855975704134	2.95694129727103	2.93099593027353	2.8609390151905	2.73046330928945	2.8558018627921	2.56493860120617
HORVU1Hr1G027510	0.0598200825808555	0.251697729085918	0.0413528078816503	0.0919077140768305	2.34744955043436	0.107017992437918	0.0875421671912041	0.450008048605108	0.114217131287683	0.299979551897061	0.763710207183948	0.471404724093889	2.00716177040483	0.663672263888304	1.25298724771566
HORVU1Hr1G027520	1.19640165161711	1.40950728288114	1.06138873562902	2.46619032772829	2.23293981626683	2.18316704573353	2.33445779176544	1.82503264156516	2.17012549446597	1.86415864393174	2.24984898873109	1.59302286073107	2.26031730901444	2.39324240614267	3.03665144740501
HORVU1Hr1G027550	14.3767598469323	16.4106919364019	20.5247769785924	13.6023416833709	10.5348955434127	12.6067195091867	24.3367224791547	20.0753590572167	8.6641852448228	9.85647099090343	15.439330674962	15.2637598594538	12.4227039303434	10.7997577487279	12.4119442656069
HORVU1Hr1G027570	2.85142393635411	3.7922457848945	4.19041786534056	3.01763661218927	2.55738406307483	2.97510018977412	4.66891558353089	3.60006438884086	1.92537449884951	2.18556530667859	3.38509389130182	2.50332163829168	3.21869184803657	2.39324240614267	1.88685138479534
HORVU1Hr1G027600	14.5961001497287	12.2492894821813	12.2679996715563	14.2456956819087	15.7641734037299	14.1477786002928	18.7340237789177	14.8252651568238	13.9671234831795	16.1560415807417	13.5403755652073	15.2149938535131	15.1893323165771	15.4253523152221	16.1266829294227
HORVU1Hr1G027620	66.9386724079773	70.5928230842971	72.8360789488801	78.3360082981519	62.8276741465846	69.6687130770846	54.3636858257377	62.0761102603601	57.5980676350743	56.6961353085445	49.8888532638811	49.9851560892658	53.0360853387149	53.2747826375793	47.8051487569633
HORVU1Hr1G027660	1.05682145892845	1.87934304384152	2.05385612478863	1.97601585265186	0.973332740424003	1.00596912891643	0.700337337529633	1.27502280438114	1.48482270673988	1.79987731138237	2.16728572308958	1.56051219010391	1.55509830860194	1.5083460542916	1.73944112035821
HORVU1Hr1G027690	65.4830503985098	61.3974660483583	59.7272388503969	62.083660858899	51.9492494006693	55.0714589085526	48.906890737486	47.825855387865	50.9245238212654	50.417991829556	49.2077063223387	48.9773252998237	44.3022192566831	49.8558649145183	45.4760665788565
HORVU1Hr1G027700	10.0497738735837	4.68157776099808	2.7430695894828	2.5121441847667	2.09934512640471	1.88351666690736	3.35578307566282	2.80005008020956	9.34948803254889	5.52819459924584	2.72458776616976	1.85310822574839	6.92561223482025	6.83783544612192	5.58684902216747
HORVU1Hr1G027770	18.0058448568375	16.3100128447675	19.3117612807307	16.2063935822145	30.917628225233	33.2825956481925	24.9495176494932	27.9755003549509	13.4776214919466	14.0347576066125	13.2926857682828	13.0692895921202	17.8836305489223	11.7248766620267	11.3505903616595
HORVU1Hr1G027810	41.8541177790719	44.2316809246987	54.3375895564885	52.2035815956397	62.5986546782496	58.6886670529542	42.7205775893076	58.0260378229141	69.7703504837331	65.6740947546065	60.3124655511215	66.403044755984	60.0882753428399	66.5884504767932	60.9541443447559
HORVU1Hr1G027840	265.700866796633	192.817240328419	218.273904268644	250.923377382093	191.174001192691	326.897159700864	170.357057354083	210.853771218638	104.06812333612	83.7800034226791	64.2342206690931	86.4621285329446	72.456731657767	75.7591944868861	36.6609327655158
HORVU1Hr1G027850	0.338980467958181	1.14102970518949	1.7506022003232	2.08324151907483	3.28261237946919	2.56843181851003	0.320987946367748	2.50004471447282	1.43587250761658	1.22134531843803	2.18792653949996	2.56834297954601	4.50255207955677	2.23235216035157	3.59681045226613
HORVU1Hr1G027920	3.15052434925839	3.20495108369402	3.65283136287911	3.20145204034293	2.82457344279907	2.95369659128654	3.06397585169214	2.42504337303864	2.54541035441122	2.89265996472166	3.46765715694333	4.17762117559067	2.49539030915194	2.69491161700099	2.5944206540936
HORVU1Hr1G027930	0.199400275269518	0.671193944229115	0.48244942528592	0.750579664960783	0.648888493616002	0.642107954627508	0.116722889588272	0.55000983718402	0.522135457315121	0.535677771244751	0.660506125132063	0.715234753797624	0.524393615691351	0.442448175925536	0.398007713980268
HORVU1Hr1G027980	7.57721046024169	8.22212581680665	12.6126064039033	14.720552204639	13.0159397837092	9.58881212243745	12.6352527979305	11.2502012151277	13.8365896188507	10.3707216512984	14.345367405212	20.5955098423089	13.0375102383953	13.0321099090794	17.3796701771384
HORVU1Hr1G028030	88.174801724181	100.679091634367	87.6541684398048	43.1506717590719	50.2125184324618	38.0984053078988	59.207685743651	95.4017063042828	56.2600955257043	74.4806373138702	103.926510626248	121.053482080248	144.87729823859	78.6954414725737	88.8736484291495
HORVU1Hr1G028090	1.35592187183272	2.03036168129307	2.81199093595222	2.55809804180512	1.85124070237506	2.20457064422111	1.28395178547099	1.05001878007858	2.25170915967146	1.99272130903048	1.75446939488204	1.96689557294347	2.51347284762406	2.33290856397101	2.09322575500734
HORVU1Hr1G028150	0.0199400275269518	0	0.0137842692938834	0	0.133594689862118	0	0.175084334382408	0.125002235723641	0	0.12856266509874	0.309612246155655	0.0812766765679118	0.958374539022124	0.623449702440528	1.28246930060309
HORVU1Hr1G028170	0.43868060559294	0.536955155383292	0.317038193759319	0.536128332114845	0.0190849556945883	0.107017992437918	0.116722889588272	0.100001788578913	1.45218924065768	1.39276220523635	0.784351023594325	0.471404724093889	0.253155538609618	0.30166921085832	0.0884461586622818
HORVU1Hr1G028190	50.4482696431881	43.9128638011898	37.9343090967672	44.5446054225705	32.0436406112137	36.7927858001562	34.4624331509374	35.9506429941191	28.8806174827427	29.8479654137576	25.7597388801505	31.1127117901967	26.8344870926195	29.2418021725332	24.7501833989952
HORVU1Hr1G028200	42.3127384121918	42.6375953071545	25.5836038094477	46.030446800146	41.9487326167051	44.0272020889595	3.03479512929508	26.5504748677013	9.10473703693243	4.99251682800108	4.85059185643859	4.60025989374381	14.7553513932463	7.90373332448798	3.00716939451758
HORVU1Hr1G028270	0	0.0503395458171836	0.0689213464694172	0.275723142230492	0.343529202502589	0.0214035984875836	0.029180722397068	0.0750013414341846	0.0489501991232926	0.0428542216995801	0.0412816328207539	0.0812766765679118	0.289320615553849	0.10055640361944	0.147410264437136
HORVU1Hr1G028280	24.6857540783664	24.6328177532085	20.9658735959967	20.1277893828259	15.0771149987247	15.1537477292092	10.738505842121	14.075251742482	13.3960378267411	12.556286957977	12.3432082134054	15.1174618416316	13.2545007000607	14.0980077874455	12.4709083713817
HORVU1Hr1G028330	8.51439175400843	10.3699464383398	11.6614918226254	11.4884642596038	8.35921059422967	8.66845738747136	8.84175888631161	8.62515426493123	8.40311751616524	6.98523813703156	8.81362860723097	9.05422176966538	9.40292000550008	7.40095130639078	8.60875944312876
HORVU1Hr1G028450	7.51739037766084	6.94685732277134	10.3795547782942	13.8014750638707	11.1456141256396	10.5733776528663	7.47026493364942	8.35014934633922	9.05578683780914	7.04951946958093	7.92607350158476	10.5984786244557	9.24017715925104	7.3808400256669	8.90357997200303
HORVU1Hr1G028500	7.33793012991827	6.71193944229115	6.54752791459463	7.06157603156981	6.06901591087908	6.20704356139924	5.10662641948691	6.6501189404977	5.80875696263073	5.91388259454206	6.64634288414139	7.13609220266266	5.46092661857889	5.91271653282307	5.91115160392917
HORVU1Hr1G028510	7.33793012991827	6.71193944229115	6.54752791459463	7.06157603156981	6.06901591087908	6.20704356139924	5.10662641948691	6.6501189404977	5.82507369567182	5.91388259454206	6.64634288414139	7.13609220266266	5.46092661857889	5.91271653282307	5.92589263037288
HORVU1Hr1G028520	1.05682145892845	0.771873035863482	0.675429195400288	0.1991333804998	0.133594689862118	0.214035984875836	0.379349391161884	0.225004024302554	0.522135457315121	0.428542216995801	0.639865308721686	0.487660059407471	0.415898384858657	0.623449702440528	0.530676951973691
HORVU1Hr1G028570	8.83343219443966	12.0311514503069	18.7466062396815	23.6662363747839	25.5929255864429	18.4713054947846	14.8529877001076	17.7753179199017	23.593995977427	21.5128192931892	25.1198735714288	34.4775662001082	36.8883784831157	33.585838808893	50.1637129879575
HORVU1Hr1G028650	0	0	0.0137842692938834	0	0.0381699113891766	0	0.233445779176544	0	0	0	0	0.0812766765679118	0.198907923193271	0.241335368686656	0.427489766867695
HORVU1Hr1G028660	0.398800550539037	0.201358183268734	0.096489885057184	0.0919077140768305	0.0572548670837649	0.0428071969751672	0.175084334382408	0.200003577157826	0.0326334660821951	0.0857084433991602	0.0619224492311309	0.146298017822241	0.16274284624904	0.120667684343328	0.206374370211991
HORVU1Hr1G028680	15.3937012508068	17.1993448208711	19.8769163217799	18.0292299114049	25.5738406307483	22.9446575786896	53.5466255986198	34.5256175068696	16.1535657106866	17.6773664510768	28.1127919509334	23.976619587534	27.0153124773406	27.1502289772488	29.0545631205596
HORVU1Hr1G028720	69.0722553533611	73.7809943193854	58.5693602297107	55.0680386843676	45.937488356874	48.9928369380789	46.747517280103	39.6507091715389	43.5819939527715	59.4602326081674	47.907334888485	49.2048999942138	71.2271190416631	68.8610251985925	68.9732627301361
HORVU1Hr1G028780	1.81454250495262	1.64442516336133	2.75685385877669	3.33931361145818	4.35136989836613	3.42457575801338	3.4725059652511	3.17505678738048	4.19340039156207	5.42105904499688	3.52957960617446	4.89285592938829	3.8334981560885	4.1831463905687	4.06852329846496
HORVU1Hr1G028810	1.0767614864554	1.04035061355513	1.08895727421679	0.995666902498997	0.992417696118591	0.642107954627508	0.641975892735497	0.675012072907661	0.962687249424755	0.492823549545171	0.743069390773571	0.715234753797624	0.705219000412506	0.724006106059968	0.899202613066531
HORVU1Hr1G028820	61.4352248105386	46.798997761375	38.5270326764042	34.3888030170808	27.2342317761775	35.9366418606529	54.1886014913553	35.3006313683562	32.290814688332	37.6260066522313	33.4381225848107	35.0952689420243	35.5502706361792	34.5914028450874	36.6756737919595
HORVU1Hr1G028850	0.378860523012085	0.302037274903102	0.317038193759319	0.29104109457663	0.267189379724236	0.192632386388252	0.671156615132565	0.0750013414341846	0.326334660821951	0.342833773596641	0.247689796924524	0.666468747856877	0.307403154025964	0.281557930134432	0.427489766867695
HORVU1Hr1G028890	11.5452759381051	15.0011846535207	19.1877028570857	16.9416552948291	16.0695326948433	14.3832181836562	15.1447949240783	15.8252830426129	14.3424083431247	9.68505410410511	10.733224533396	14.0283543756216	11.1930913142395	10.236641888459	7.91593120027422
HORVU1Hr1G028900	1.69490233979091	2.29883925898472	1.40599546797611	0.980348950152859	1.24052212014824	1.45544469715568	3.20987946367748	1.20002146294695	1.3216553763289	1.69274175713341	1.09396326974998	1.34919283102734	1.08495230832693	1.18656556270939	0.737051322185681
HORVU1Hr1G028920	46.8989447433907	52.0175306777564	41.6698460754096	22.5939797105542	19.3139751629233	30.2646882614432	12.2850841291656	13.0002325152587	22.076539804605	29.8908196354571	27.8857429704193	23.3751721809314	15.9487989324059	19.6688325479625	11.0705108592289
HORVU1Hr1G028970	3.56926492732438	5.99040595224485	10.172790738886	12.7904902090256	16.5084866758189	11.8147863651461	3.96857824600125	7.32513101340536	15.8435477829057	13.4347985028184	16.9667510893299	20.0753391122742	18.7515923955838	13.5550032079005	19.2665215619337
HORVU1Hr1G029020	0.0997001376347591	0.0503395458171836	0.165411231526601	0.29104109457663	0.248104424029648	0.149825189413085	0	0.0750013414341846	0.293701194739756	0.0857084433991602	0.371534695386786	0.601447406602548	0.65097138499616	0.241335368686656	0.530676951973691
HORVU1Hr1G029050	0.0598200825808555	0.0838992430286393	0.165411231526601	0.214451332845938	0.152679645556706	0.192632386388252	0	0.100001788578913	0.277384461698658	0.0642813325493702	0.0412816328207539	0.487660059407471	0.361650769442311	0.160890245791104	0.206374370211991
HORVU1Hr1G029080	0.0997001376347591	0.771873035863482	0.84084042692689	1.54711318695998	1.81307079098589	1.1771979168171	0.0875421671912041	0.800014308631302	0.750569719890487	0.278552441047271	0.536661226669801	1.57676752541749	1.3923554623529	0.563115860268864	1.23824622127194
HORVU1Hr1G029090	8.99295241465527	7.63483111560618	6.02372568142706	5.33064741645617	5.93542122101696	4.70879166726839	13.3647708578572	8.47515158206286	5.20503784011012	6.12815370303996	9.39157146672152	9.67192451158151	7.64891377370487	9.41207937877958	9.61114924130129
HORVU1Hr1G029110	1.95412269764128	2.13104077292744	2.68793251230727	2.78786732699719	2.9390831769666	3.25334697011271	2.04265056779476	2.7500491859201	2.54541035441122	2.44269063687607	2.35305307078298	2.97472636238557	4.28556161789138	3.49936284595651	3.7884437960344
HORVU1Hr1G029170	0.338980467958181	0.151018637451551	0.096489885057184	0.122543618769107	0.190849556945883	0.23543958336342	0.350168668764816	0.100001788578913	0.0815836652054877	0.10713555424895	0.309612246155655	0.130042682508659	0.108495230832693	0.20111280723888	0.176892317324564
HORVU1Hr1G029180	4.46656616603721	1.30882819124677	2.01250331690698	3.96734965764985	5.01934334767672	11.6863647742206	13.1605058010777	23.1004131617289	2.52909362137012	2.8069515213225	5.11892246977349	2.89344968581766	11.5547420836818	14.6812349284382	17.5418214680192
HORVU1Hr1G029280	2.79160385377326	2.43307804783054	1.64032804597213	2.28237489957462	1.31686194292659	1.13439071984193	3.38496379805989	1.65002951155206	1.43587250761658	2.8069515213225	2.49753878565561	1.43046950759525	0.741384077356737	0.985452755470512	0.928684665953959
HORVU1Hr1G029290	0.797601101078073	0.637634247017659	0.799487619045239	1.04162075953741	1.73673096820753	0.898951136478511	1.05050600629445	0.650011625762933	1.14217131287683	1.43561642693593	1.65126531283016	1.23540548383226	2.49539030915194	2.25246344107546	3.25776684406071
HORVU1Hr1G029370	4.48650619356416	3.85936517931741	5.47235490967172	5.17746789299479	5.85908139823861	7.06318750090259	8.28732516076732	5.87510507901113	6.13509162345268	5.48534037754626	5.09828165336311	6.03072940133906	6.41930115760102	7.32050618349523	7.91593120027422
HORVU1Hr1G029460	3.76866520259389	3.94326442234605	2.86712801312775	2.3130108042669	7.13777342977602	1.15579431832951	3.91021680120712	5.40009658326129	1.84379083364402	2.99979551897061	3.61214287181597	4.03132315776843	20.0716177040483	38.0505431295961	64.5656958234657
HORVU1Hr1G029480	8.87331224949356	10.9069015937231	10.2003592774737	7.99597112468426	7.36679289811108	7.12739829636534	8.72503599672334	9.65017259786508	6.73881074597329	5.54962171009563	7.43069390773571	8.29022100992701	8.71578354355969	7.17972721842802	9.06573126288388
HORVU1Hr1G029490	14.2770597092975	15.6891584463556	18.6363320853304	20.9702767618635	21.6995946247469	16.8232284112407	11.4096624572536	11.225200767983	17.8015557478374	16.5417295760379	14.3660082216224	19.4413810350445	22.3319350130627	18.1202639322231	21.3302652640536
HORVU1Hr1G029540	0.179460247742566	0.352376820720285	0.592723579636988	0.673989903230091	0.839738050561885	0.599300757652341	0.14590361198534	0.400007154315651	0.293701194739756	0.299979551897061	0.185767347693393	0.308851370958065	1.21153007763174	0.965341474746624	1.72470009391449
HORVU1Hr1G029770	0.199400275269518	0.654414095623387	0.358391001640969	1.30202594942177	0.11450973416753	0.29965037882617	0.204265056779476	0.250004471447282	0.228434262575366	0.214271108497901	0.577942859490555	0.812766765679118	0.524393615691351	0.623449702440528	0.501194899086263
HORVU1Hr1G029800	18.1853051045801	17.0483261834195	18.8155275861509	19.8980200976338	17.3291397706862	17.3797219719179	15.1447949240783	17.0003040584152	16.6593844349606	16.3060313566902	12.756024541613	16.2228246429552	13.6703990849194	15.0231267007443	12.8246930060309
HORVU1Hr1G029850	65.4431703434559	51.8665120403048	41.4079449588258	48.6038627942972	27.8258654027097	55.7777776586429	44.6465052675141	96.851732238677	39.9107290185246	34.3048044705139	27.1839552124665	31.9742445618165	35.6949309439561	64.5974336851283	49.3824385864407
HORVU1Hr1G029870	76.8289260613454	55.8601160084681	47.2386908701385	40.607891669613	46.7199715403521	48.1366929985755	72.076384320758	66.9261970064374	62.4115038821981	69.3809849316202	59.13593901573	61.5914655031636	64.9705607303111	63.0689763501128	71.4055320933488
HORVU1Hr1G029920	21.3956495364193	19.6492027173073	8.9046379638487	10.4927973571048	4.33228494267154	3.93826212171538	2.85971079491267	1.32502369867059	14.211874478796	11.5920669697364	8.97875513851398	5.77064403632174	3.65267277136734	3.74069821464317	0.737051322185681
HORVU1Hr1G029950	6.12158845077421	6.15820443830213	7.26430991787657	9.11418164595236	11.6609079293934	10.7874136377421	11.584746791636	5.35009568897183	13.1349700980835	12.2348802952301	11.4350122913488	10.9723513366681	11.5366595452097	12.5494391717061	13.5322622753291
HORVU1Hr1G030000	21.7745100594314	20.4378556017765	23.6124533004223	24.4474519444369	25.4784158522754	23.7579943212178	28.743011561112	25.4004542990438	22.6149919949612	21.534246404039	23.3034817273156	22.5461500799387	28.6246584013589	30.0261421207648	34.9804557509324
HORVU1Hr1G030030	31.46536343753	30.0359290042529	29.3880621345595	25.0448520859363	19.5429946312584	22.3453568210373	26.1167465453759	18.5003308870989	23.5287290452627	27.6838272179288	24.2116776493722	25.7647064720281	19.9992875501598	23.6910886927401	21.7282729780339
HORVU1Hr1G030040	6.77960935916362	6.1414245896964	7.58134811163589	7.39857098318486	9.92417696118591	8.30459621318244	7.70371071282596	11.7502101580223	9.17000396909682	8.69940700501476	12.8179469908441	9.54188182907285	10.8314405447972	7.28028362204746	11.8960083400769
HORVU1Hr1G030060	5.36386740475004	2.36595865340763	3.92851674875678	3.26272384972748	3.60705662627719	4.15229810659122	4.55219269394261	5.0500903232351	3.27966334126061	4.11400528315969	4.02495920002351	2.51957697360527	1.59126338554617	2.55413265193378	2.46175141610018
HORVU1Hr1G030080	1.53538211957529	3.18817123508829	3.10146059112377	3.44653927788115	2.42378937321271	2.22597424270869	0.962963839103245	3.15005634023575	1.77852390147963	1.60703331373425	2.22920817232071	2.29200227921511	1.98907923193271	1.76979270370214	2.1669308872259
HORVU1Hr1G030100	0.0997001376347591	0.369156669326013	0.317038193759319	0.459538570384153	0.381699113891766	0.342457575801338	0.233445779176544	0.250004471447282	0.342651393863048	0.257125330197481	0.557302043080178	0.698979418484042	0.415898384858657	0.341891772306096	0.280079502430559
HORVU1Hr1G030140	11.7247361858477	11.4438567491064	10.5036132019392	10.9370179751428	15.7069185366462	13.3558454562522	10.7968672869152	14.4752588967976	10.2469083498093	10.413575872998	10.6093796349338	9.0379664343518	19.0228304726656	15.5661312802893	17.8219009704498
HORVU1Hr1G030190	9.45157304777516	9.83299128295653	10.875788472874	9.91071516795156	19.1422105616721	18.8993774645363	14.0067467505927	15.0002682868369	7.21199600416512	8.35657323141812	7.49261635696684	8.14392299210477	11.3739166989607	7.28028362204746	7.23784398386339
HORVU1Hr1G030200	13.4595185806925	16.0415352670758	25.0046644991045	33.8526746849659	50.8804918817724	28.8520507612627	32.186336803966	42.5507610403274	45.8500198454841	54.5319971127157	86.0515636148616	92.8179646405553	46.5625365656975	37.0852016548495	52.094787452084
HORVU1Hr1G030220	0.857421183658928	0.805432733074938	0.785703349751356	0.750579664960783	0.763398227783532	0.492282765214423	1.60493973183874	0.850015202920759	1.10953784679463	1.24277242928782	0.949477554877341	1.33293749571375	1.0487872313827	1.14634300126162	1.14980006260966
HORVU1Hr1G030390	38.1652126865858	35.0531037373655	34.8466327749373	31.9685665463909	28.3411592064636	25.2134390183735	20.7474936243154	17.1003058469941	45.6868525150731	34.8619093526084	32.9221021745513	33.4209694047253	25.1166459377685	26.6273356784277	23.6298653892729
HORVU1Hr1G030410	4.14752572560598	3.4902085099914	3.14281339900542	3.27804180207362	3.53071680349883	3.74562973532713	3.18069874128042	2.02503621872298	4.40551792109634	4.26399505910822	2.97227756309428	3.18604572146214	2.6762156938731	2.77535673989654	2.44701038965646
HORVU1Hr1G030460	2.45262338581507	2.39951835061908	2.61901116583785	3.40058542084273	3.2635274237746	3.18913617464996	2.80134935011853	2.55004560876228	2.59436055353451	1.99272130903048	1.96087755898581	2.61710898548676	3.20060930956445	1.91057166876936	2.29960012521933
HORVU1Hr1G030480	12.3628170667101	11.5780955379522	11.6614918226254	12.5147670667951	11.5273132395313	10.4449560619408	8.60831310713507	8.90015918352324	10.70377687496	8.57084433991602	8.17376329850928	10.1108185650482	11.3377516220164	9.53274706312291	9.68485437351985
HORVU1Hr1G030540	10.747674837027	11.3599575060778	7.41593688010929	9.89539721560542	11.4891433281422	9.88846250126362	12.9270600219011	10.57518914222	7.09777887287743	10.5635656489465	10.3823306544196	9.41183914656419	7.84782169689815	8.10484613172686	10.1270851668313
HORVU1Hr1G030620	4.3868060559294	2.70155562552219	1.87466062396815	2.19046718549779	2.84365839849366	3.31755776557546	3.06397585169214	2.45004382018336	2.61067728657561	2.61410752367439	2.6007428677075	1.86936356106197	1.53701577012982	2.07146191456046	1.07609493039109
HORVU1Hr1G030630	9.03283246970918	10.2524874980997	9.38708738913462	9.35926888349058	8.91267430937273	8.17617462225694	8.52077093994387	7.6251363791421	9.77372309161743	7.82089546017337	7.86415105235363	7.98136963896894	8.58920577425488	7.09928209553246	7.73903888294966
HORVU1Hr1G030660	46.4004440552169	45.1713524466194	54.4892165187212	73.4955353567722	66.2820511273051	66.9076488721863	51.0079027500749	49.4258840051276	74.9753883238432	71.7593942359469	57.3608288044376	77.8793114873731	55.4591454939784	60.8165129090373	55.9716774067806
HORVU1Hr1G030710	5.12458707442662	3.57410775302004	3.14281339900542	3.07890842157382	4.48496458822825	3.68141893986438	4.58137341633968	2.82505052735429	5.27030477227451	7.73518701677421	6.06840002465083	3.99881248714126	5.82257738802121	5.65126988341253	6.57449779389628
HORVU1Hr1G030740	1.59520220215615	3.62444729883722	2.50873701148679	2.98700070749699	3.96967078447436	2.82527500036104	1.72166262142701	2.65004739734119	3.68758166728805	3.2354937383183	3.24060817642918	4.16136584027709	5.78641231107697	3.78092077609094	5.57210799572375
HORVU1Hr1G030790	236.867586992661	287.153549189821	332.697123677171	257.234373748703	141.037822583007	182.808134682452	171.232479025995	179.753214970596	112.014372327135	113.885094166634	141.657923024417	141.535204575362	127.120245458972	120.024123360164	123.293945175221
HORVU1Hr1G030870	5.36386740475004	5.58768958570738	5.69290321837386	6.00463731968626	6.25986546782496	5.82177878862274	5.34007219866345	5.20009300610347	5.66190636526085	5.72103859689395	3.98367756720276	4.9741326059562	4.7737901566385	4.88704121590478	5.20358233463091
HORVU1Hr1G030880	0.338980467958181	0.151018637451551	0.096489885057184	0.122543618769107	0.190849556945883	0.23543958336342	0.379349391161884	0.125002235723641	0.0815836652054877	0.10713555424895	0.309612246155655	0.130042682508659	0.108495230832693	0.20111280723888	0.176892317324564
HORVU1Hr1G030930	1.41574195441358	2.55053698807064	3.9974380952262	3.01763661218927	2.99633804405036	2.20457064422111	2.01346984539769	3.15005634023575	2.38224302400024	1.58560620288446	2.3324122543726	2.81217300924975	3.47184738664618	2.47368752903822	3.84740790180926
HORVU1Hr1G031010	37.2280313928191	47.1513745820953	69.9689509357523	85.5967177102215	89.5847820303974	63.1834227353468	42.1953245861604	61.1510937160052	68.6118624378152	43.7541603552713	50.8796124515792	74.1568397005628	65.6396146537794	56.4925875534014	64.550954797022
HORVU1Hr1G031150	0.0199400275269518	0.0838992430286393	0.206764039408252	0.321676999268907	0.400784069586354	0.23543958336342	0	0.0750013414341846	0.163167330410975	0.0428542216995801	0.0619224492311309	0.292596035644483	0.0542476154163466	0.080445122895552	0.16215129088085
HORVU1Hr1G031180	28.6538195562298	39.9863792274495	51.6496570441812	60.199552720324	50.4606228564914	44.669310043587	25.5331320974345	57.3760261971512	36.7126493424695	28.3909218759718	32.7569756432683	55.8858428080962	53.2530758003803	35.4762991969384	50.4290514639443
HORVU1Hr1G031220	48.3944468079121	40.8085918091302	38.0445832511183	35.9052802993485	34.6582795413723	35.2303231105626	28.0718549459794	29.6755307607924	57.3859501055401	65.4383965352588	38.928579749971	29.5196889294656	32.1507534034214	34.470735160744	24.4258808172335
HORVU1Hr1G031230	245.541498966885	252.67096030505	275.616464531199	293.645146475474	234.687700176352	293.999828825448	232.278550280662	253.154527787518	161.503023640784	136.876384108459	129.21151072896	151.483469787274	130.574010307146	142.14653215644	100.224238790809
HORVU1Hr1G031250	5.06476699184576	7.63483111560618	11.3031008209844	12.9589876848331	26.1273043458914	16.1597168581256	23.9865538103899	23.6754234460576	17.4099541548511	13.4347985028184	18.0400735426695	20.6605311835632	22.530842936256	17.5370367912303	21.3155242376099
HORVU1Hr1G031270	8.51439175400843	8.69196157776704	13.1088400984831	14.0159263967167	14.6572459734438	11.7291719711958	16.3995659871522	13.525241905298	17.067302760988	12.4277242928782	14.1389592411082	22.7899801096425	12.3322912379828	13.9572288223783	13.488039195998
HORVU1Hr1G031310	24.8652143261089	29.784231275167	39.9054596057925	52.1269918339091	63.5338175072844	55.0714589085526	20.2806020659623	35.1006277911984	47.677493946087	40.0901243999572	35.8118164720041	42.3939144978228	43.5246701023821	39.9208922369177	38.1497764363309
HORVU1Hr1G031370	18.623985710173	18.0383372511575	19.0636444334408	24.1870467545526	21.1270459539092	19.9695573889155	11.14703595568	12.5252240195088	14.3260916100836	11.9349007433331	10.8364286154479	12.922991574298	13.9416371620011	12.4488827680867	13.6796725397662
HORVU1Hr1G031430	0.338980467958181	0.352376820720285	0.523802233167571	0.58208218915326	0.66797344931059	0.620704356139924	0.408530113558952	0.500008942894564	0.636352588602804	0.664240436343492	0.68114694154244	0.942809448187777	0.614806308051928	0.60333842171664	0.663346189967113
HORVU1Hr1G031460	0.757721046024169	0.738313338652026	1.02003592774737	1.07225666422969	1.297776987232	0.791933144040593	1.28395178547099	0.800014308631302	1.81115736756183	1.86415864393174	1.94023674257544	1.78808688449406	1.42852053929713	1.76979270370214	2.04900267567619
HORVU1Hr1G031500	3.52938487227047	2.91969365739665	4.03879090310785	3.09422637391996	5.42012741726307	5.26528522794557	12.1683612395774	8.6001538177865	3.42651393863048	5.24964215819857	7.12108166158006	6.19328275447488	9.14976446689047	7.24006106059968	9.71433642640728
HORVU1Hr1G031540	0.717840990970266	0.872552127497849	1.24058423644951	1.47052342522929	2.02300530362636	2.07614905329561	1.16722889588272	1.25002235723641	1.01163744854805	1.11420976418908	0.701787757952817	1.3817035016545	1.42852053929713	1.02567531691829	1.14980006260966
HORVU1Hr1G031600	108.254409443821	111.485314136456	112.645048669615	115.941581307922	81.6072705500595	92.8274066406501	95.3042393488242	83.5514943576816	68.3181612430754	71.1594351321528	75.0706492845411	87.0960866101743	88.7129337441988	91.1242129599365	91.4828101096868
HORVU1Hr1G031610	0.239280330323422	0.251697729085918	0.289469655171552	0.352312903961184	0.400784069586354	0.385264772776505	0.700337337529633	0.325005812881467	0.489501991232926	0.514250660394961	0.247689796924524	0.438894053466724	0.216990461665387	0.382114333753872	0.206374370211991
HORVU1Hr1G031660	7.83643081809207	10.5545247730028	14.900795106688	17.0488809612521	17.2337149922132	11.4081179938821	13.0437829114894	12.3002199952063	17.4425876209333	13.2848087268698	17.1731592534336	20.8068292013854	18.3899416261415	16.5918065972076	26.0179116731546
HORVU1Hr1G031780	0.65802090838941	0.604074549806203	0.895977504102423	0.796533521999198	1.06875751889694	0.620704356139924	0.641975892735497	0.9750174386444	0.832153385095975	0.857084433991602	1.15588571898111	0.601447406602548	1.3923554623529	0.864785071127184	1.01713082461624
HORVU1Hr1G031860	12.841377727357	19.3136057451928	25.900642003207	32.1217460698523	40.0211520915516	37.7559477320975	18.9091081133001	29.1755218178978	28.1463644958933	20.1200570879529	21.89990621141	27.243941985564	30.3967471716262	23.5704210083967	26.3274732284725
HORVU1Hr1G031950	18.1853051045801	25.1865527571975	30.8491946797111	28.659888839625	29.5053415038335	27.3323952686443	18.4713972773441	20.5753680001113	28.2932150932631	26.9553054490359	27.9476654196504	30.2674343538904	31.6625248646743	27.2306741001444	31.811135065534
HORVU1Hr1G031970	9.59115324046383	8.72552127497849	10.8482199342863	13.4797980646018	11.35554863828	12.3498763273357	26.1167465453759	19.8003541386247	13.1839202972068	14.8489878189045	14.9026694482922	18.254741557153	15.1170021626886	15.4655748766699	15.1095521048065
HORVU1Hr1G031990	0.0598200825808555	0.0838992430286393	0.165411231526601	0.229769285192076	0.229019468335059	0	0.320987946367748	0.150002682868369	0.0979003982465853	0.0214271108497901	0.0619224492311309	0.243830029703736	0.0723301538884622	0.120667684343328	0.235856423099418
HORVU1Hr1G032000	0.0598200825808555	0.0838992430286393	0.165411231526601	0.229769285192076	0.229019468335059	0.0214035984875836	0.320987946367748	0.150002682868369	0.0979003982465853	0.0214271108497901	0.0619224492311309	0.243830029703736	0.0723301538884622	0.120667684343328	0.235856423099418
HORVU1Hr1G032060	29.1922002994575	28.8781194504577	26.6863453529583	25.4124829422436	22.0812937386387	26.3264261397278	33.2076620878634	27.225486940609	26.4167907935369	26.3767734560916	26.8330613334901	30.5112643835941	25.7133697073483	26.22511006395	25.1334500865317
HORVU1Hr1G032090	0.159520220215615	0.23491788048019	0.234332577996018	0.29104109457663	1.06875751889694	0.385264772776505	0.758698782323769	0.625011178618205	0.375284859945244	0.492823549545171	1.05268163692923	0.568936735975383	2.54963792456829	1.70945886153048	4.14222843068353
HORVU1Hr1G032150	0.21934030279647	0.117458940240095	0.124058423644951	0.137861571115246	4.02692565155813	0.128421590925502	0.408530113558952	0.100001788578913	0.293701194739756	0.385687995296221	1.32101225026413	0.942809448187777	1.91674907804425	0.30166921085832	0.972907745285099
HORVU1Hr1G032190	18.9829062056581	15.4374607172696	17.2854736945298	15.5017677742921	16.2031273847055	16.9302464036786	14.3277346969604	10.0751801993255	14.7992768682755	15.9631975830936	14.4485714872639	13.9145670284265	12.6577769304809	14.8421251742293	12.6035776093752
HORVU1Hr1G032310	23.2500720964258	32.8213838728037	41.6422775368219	44.9735080882624	45.7848087113173	38.6120916716008	16.282843097564	27.6004936477799	34.6567409792912	24.1483539277134	26.5647307201552	38.8014853935211	39.5826767154609	26.4061115904649	34.641412142727
HORVU1Hr1G032390	0.199400275269518	0.302037274903102	0.551370771755337	0.505492427422568	0.648888493616002	0.428071969751672	0.262626501573612	0.350006260026195	0.277384461698658	0.257125330197481	0.247689796924524	0.796511430365536	0.65097138499616	0.30166921085832	0.427489766867695
HORVU1Hr1G032500	3.58920495485133	5.90650670921621	7.51242676516647	4.84047294137974	5.82091148684943	3.57440094742646	4.52301197154555	6.10010910331368	5.2866215053156	4.39255772420696	7.16236329440081	6.58341080200086	4.84612031052697	4.58537200504646	5.95537468326031
HORVU1Hr1G032510	65.1839499856055	68.8309389806957	72.8085104102923	72.7755915965036	52.5599679828962	68.4701115617799	59.8204809139895	54.9759832712573	52.1156453332656	44.6755261218123	47.2468287633529	55.5932467724517	53.7413043391274	54.1194564279826	56.7382107818538
HORVU1Hr1G032610	35.7125893007707	66.0287042635392	73.0014901804067	90.7588676508702	83.8211254106318	76.2396178127728	31.6610838008188	87.9015721608643	42.4561393729358	28.990880979766	45.6162042669331	67.3295988688582	80.2322232007767	51.1630981615711	73.6756501656807
HORVU1Hr1G032650	0.677960935916362	0.335596972114557	0.275685385877669	0.275723142230492	0.171764601251295	0.428071969751672	0.525253003147225	0.150002682868369	0.163167330410975	0.449969327845591	0.144485714872639	0.260085365017318	0.32548569249808	0.261446649410544	0.398007713980268
HORVU1Hr1G032670	73.279601161548	101.601983307682	144.169672544727	168.941696425561	210.354381665752	155.176089034981	90.3143358189256	137.627461531729	145.69210932396	102.657288081344	120.170833141215	163.089779201172	143.195622160683	106.066894537785	140.540946114366
HORVU1Hr1G032780	19.1823064809277	20.0519190838448	21.8067140229236	23.2526516614381	24.6577627574081	22.2169352301118	12.2267226843715	17.4503121070203	18.73160953118	16.9059904604844	16.7809837416365	21.213212584225	19.8546272423829	16.2499148249015	20.7406242063051
HORVU1Hr1G032850	20.677808545449	20.4881951475937	24.6187049588758	21.6749025697859	22.3866530297521	21.3179840936333	18.5297587221382	19.2003434071513	23.4960955791805	20.4200366398499	20.971069472943	20.5142331657409	22.4404302438954	22.9268600252323	24.8238885312138
HORVU1Hr1G032900	11.8244363234824	12.9708229722276	14.4596984892837	19.2240301944037	17.7871787073563	18.5783234872226	11.7890118484155	16.000286172626	15.1908784612618	13.0062562858226	13.7055020964903	20.1891264594693	18.1187035490598	16.7124742815509	18.1904266315426
HORVU1Hr1G032940	2.75172379871935	2.56731683667636	2.85334374383387	3.3086777067659	3.89333096169601	4.34493049297947	3.93939752360418	3.67506573027504	4.19340039156207	3.68546306616389	3.57086123899522	3.60868443961529	2.6762156938731	3.62003053029984	3.05139247384872
HORVU1Hr1G032960	9.95007373594896	8.59128248613267	10.5173974712331	12.2237259722185	14.9626052645572	13.4414598502025	7.41190348885528	12.5252240195088	12.7923187042205	10.2850132078992	11.5175755569904	13.7845243459178	10.9941833910463	8.92940864140627	9.61114924130129
HORVU1Hr1G033060	5.52338762496566	4.53055912354652	4.56259313627542	4.41157027568787	4.17960529711484	4.75159886424356	3.96857824600125	2.55004560876228	4.48710158630182	4.5211203893057	3.88047348515087	4.40519586998082	6.85328208093179	6.43560983164416	5.11513617596863
HORVU1Hr1G033080	0.0199400275269518	0.184578334663007	0.137842692938834	0.137861571115246	0.171764601251295	0.342457575801338	0.029180722397068	0.200003577157826	0.114217131287683	0.342833773596641	0.330253062566032	0.130042682508659	0.216990461665387	0.30166921085832	0.3243025817617
HORVU1Hr1G033110	12.3827570942371	10.6887635618487	12.3644895566134	15.8693986305994	15.0580300430302	14.5544469715568	13.4814937474454	15.0002682868369	16.887818697536	16.9059904604844	14.7375429170092	16.4991653432861	13.1821705461722	12.9516647861839	13.2521827728986
HORVU1Hr1G033130	10.0098938185298	9.79943158574507	11.3858064367477	11.1974231650272	14.7908406633059	14.3190073881934	10.7676865645181	12.8252293852456	12.9554860346315	11.7206296348352	11.8065469867356	10.3383932594384	12.5854467765924	12.1472135572284	11.2768852294409
HORVU1Hr1G033160	0.857421183658928	0.70475364144057	0.813271888339123	0.811851474345336	1.03058760750777	0.749125947065426	0.641975892735497	0.725012967197118	0.99532071550695	0.814230212292022	1.01140000410847	1.15412880726435	1.12111738527116	0.643560983164416	0.825497480847963
HORVU1Hr1G033210	26.4604165282651	27.8545486855083	34.0333608865982	49.0634013646814	43.8953980975531	33.9675107997952	25.299686318258	30.2005401508317	49.4723345806078	43.2613368057261	43.9442981376926	50.3427734661646	39.0582830997696	44.4861529612403	50.6059437812689
HORVU1Hr1G033270	42.2927983846648	56.1621532833712	65.4339263380647	61.1033119087462	59.2587874316966	59.7160397803583	27.3715176084498	41.3507395773804	46.1274043071828	31.9692493878868	36.3278368822635	45.8075349136751	49.1302570287379	37.9298754452528	40.1987791120071
HORVU1Hr1G033300	0.717840990970266	0.604074549806203	0.565155041049221	0.413584713345737	0.66797344931059	0.53508996218959	0.204265056779476	0.225004024302554	0.571085656438414	0.878511544841392	1.05268163692923	0.698979418484042	1.01262215443847	0.643560983164416	0.928684665953959
HORVU1Hr1G033390	2.2332830830186	3.08749214345393	2.81199093595222	1.76156451980592	3.35895220224754	2.63264261397278	6.50730109454617	3.25005812881467	1.84379083364402	2.1641381958288	3.44701634053295	3.42987575116588	15.0446720088001	12.3282150837433	15.6844521361113
HORVU1Hr1G033470	15.1544209204834	15.7059382949613	16.8995141543011	18.1977273872124	19.0277008275045	17.165685987042	13.6857588042249	14.6502620268107	18.9600437937553	15.2561029250505	15.0884367959856	17.5882728092961	17.992125779755	18.9247151611786	19.6350472230266
HORVU1Hr1G033660	2.91124401893497	2.33239895619617	2.0814246633764	1.54711318695998	1.43137167709412	1.28421590925502	1.98428912300063	1.00001788578913	1.40323904153439	2.29270086092754	1.58934286359903	1.62553353135824	1.10303484679905	1.20667684343328	1.28246930060309
HORVU1Hr1G033740	7.97601101078073	13.2393005499193	13.3293884071853	18.7338557193273	22.6920123208655	21.0825445102698	4.2020240251778	14.5002593439424	10.3937589471791	8.24943767716917	8.85491024005172	12.4840975208313	17.52197977948	11.5036525740639	14.0187161479717
HORVU1Hr1G033800	15.8523218839267	16.091874812893	16.2103006896069	15.5936754883689	17.1382902137403	14.8112901534079	9.51291550144418	12.0002146294695	13.5918386232343	11.3349416395389	11.6001388226319	10.549712618515	14.3756180853319	12.1874361186761	14.9326597874819
HORVU1Hr1G033990	1.47556203699444	2.1646004701389	2.96361789818494	2.66532370822809	1.98483539223718	2.41860662909695	1.48821684225047	1.1500205686575	2.38224302400024	2.01414841988027	1.8783142933443	2.0319169141978	2.60388553998464	2.37313112541878	2.13744883433848
HORVU1Hr1G034070	6.06176836819335	9.66519279689925	12.9434288669565	14.3222854436394	15.5351539353949	13.3772490547398	6.62402398413444	11.4002038979961	12.2375497808232	9.55649143900637	10.7125837169856	14.3534610818932	13.2725832385328	11.6444315391312	12.9131391646931
HORVU1Hr1G034370	0.418740578065988	0.939671521920761	0.689213464694172	0.750579664960783	0.820653094867297	1.1771979168171	0.29180722397068	0.950016991499671	0.554768923397317	0.385687995296221	0.701787757952817	0.877788106933448	0.904126923605777	0.60333842171664	1.03187185105995
HORVU1Hr1G034400	11.5253359105782	9.9336703745909	7.41593688010929	10.4621614524125	6.71790440449508	6.24985075837441	6.06959025859015	4.45007959176162	17.736288815673	14.1418931608614	8.97875513851398	10.8097979835323	9.077434313002	8.30595893896574	6.54501574100885
HORVU1Hr1G034470	100.876599258849	102.47453543518	128.193704433116	124.488998717067	84.4700139042478	90.6442395949166	88.3300466959249	116.477083247289	64.8753305714038	48.2967078554268	62.748081887546	79.1959936477733	61.5167958821371	52.7518893387582	49.9425975913018
HORVU1Hr1G034490	0.0997001376347591	0.671193944229115	1.40599546797611	0.643353998537814	0.89699291764565	0.856143939503344	0.817060227117905	0.55000983718402	0.163167330410975	0.14998977594853	0.433457144617916	0.227574694390153	0.741384077356737	0.543004579544976	0.339043608205413
HORVU1Hr1G034570	8.693852001751	9.96723007180235	12.9985659441321	12.0245925917187	13.6075734102415	13.2916346607894	11.2637588452683	12.600225360943	8.6641852448228	7.15665502382988	10.7538653498064	11.1999260310583	12.838602315202	11.6243202584073	14.6820623379388
HORVU1Hr1G034630	31.5052434925839	34.717506765251	31.1248800655888	31.4783920713145	27.444166288818	29.0446831476509	23.1111321384779	21.6503872273346	29.7617210669619	26.6553258971388	26.2344776575891	27.243941985564	26.5813315540099	25.0586557819644	25.2956013774126
HORVU1Hr1G034650	3.58920495485133	3.00359290042529	2.19169881772747	2.57341599415125	5.63006192990355	3.44597935650096	4.75645775072209	4.25007601460379	5.54768923397317	6.77096702853366	7.884791868764	4.95787727064262	9.33058985161162	9.81430499325734	13.3406289315608
HORVU1Hr1G034730	29.0526201067688	29.1130373309378	29.8705115598454	30.651222644623	27.7876954913206	29.0446831476509	26.3793730469495	23.825426128926	22.9576433888242	22.5413206139791	21.6315755980751	26.4799412258257	24.0859412448579	25.3603249928228	24.8386295576575
HORVU1Hr1G034880	3.40974470710876	5.48701049407301	5.59641333331667	6.47949384241655	7.8248318347812	7.72669905401768	2.30527706936837	5.95010642044531	4.16076692547987	4.24256794825843	4.3964938954103	6.09575074259339	8.64345338967123	5.91271653282307	7.39999527474424
HORVU1Hr1G034980	44.0275807795096	39.1977263429803	42.8277246960958	46.3521237994149	51.8538246221964	45.1187856118262	46.1055413873675	41.0757346587884	45.3605178542512	38.9759146357681	35.1925919796927	40.1831888951756	44.2479716412667	47.8246255614057	46.7585358794596
HORVU1Hr1G035090	0.279160385377326	0.436276063748925	0.344606732347086	0.336994951615045	0.267189379724236	0.214035984875836	0.379349391161884	0.600010731473477	0.391601592986341	0.407115106146011	0.20640816410377	0.195064023762988	0.397815846386542	0.281557930134432	0.265338475986845
HORVU1Hr1G035160	11.166415415093	8.97721900406441	12.7228805582544	12.17777211518	11.8517574863393	10.6589920468166	14.4444575865487	11.6252079222986	18.1278904086594	16.4988753543383	15.769583737528	17.8158475036863	14.4841133161645	18.9247151611786	14.7115443908262
HORVU1Hr1G035200	7.75667070798426	8.99399885267014	9.4835772741918	10.5693871188355	10.6875751889694	10.380745266478	6.59484326173738	9.35016723212835	10.3448087480558	9.19223055455994	8.75170615799984	11.1511600251175	9.00510415911354	9.59308090529458	8.35816199358563
HORVU1Hr1G035210	6.0418283406664	4.53055912354652	4.17663359604668	5.40723717818686	5.64914688559813	4.62317727331806	6.76992759611978	4.40007869747216	5.80875696263073	5.20678793649898	4.41713471182067	5.29923931222785	5.09927584913658	5.3697119532781	5.70477723371717
HORVU1Hr1G035280	1.77466244989871	1.35916773706396	1.46113254515164	1.43988752053701	1.56496636695624	1.54105909110602	1.13804817348565	0.950016991499671	1.87642429972622	2.24984663922796	1.77511021129242	1.3817035016545	2.58580300151252	2.45357624831434	4.26015664223324
HORVU1Hr1G035290	0.378860523012085	0.251697729085918	0.192979770114368	0.352312903961184	0.190849556945883	0.171228787900669	0.612795170338429	0.55000983718402	0.293701194739756	0.17141688679832	0.185767347693393	0.243830029703736	0.289320615553849	0.362003053029984	0.309561555317986
HORVU1Hr1G035350	0.558320770754651	0.23491788048019	0.344606732347086	0.459538570384153	0.458038936670119	0.385264772776505	0.729518059926701	0.600010731473477	0.505818724274024	0.578531992944332	0.536661226669801	0.487660059407471	0.831796769717315	0.844673790403296	0.663346189967113
HORVU1Hr1G035360	1.01694140387454	0.805432733074938	0.578939310343104	0.520810379768706	0.324444246808001	0.321053977313754	0.0583614447941361	0.0750013414341846	0.440551792109634	0.492823549545171	0.0825632656415079	0.146298017822241	0.433980923330773	0.221224087962768	0.132669237993423
HORVU1Hr1G035380	0.119640165161711	0	0.137842692938834	0.260405189884353	0.858823006256473	0.385264772776505	0.437710835956021	1.05001878007858	0	0	0.020640816410377	0	0	0	0.0147410264437136
HORVU1Hr1G035390	20.6179884628682	29.4318544544467	33.9782238094227	37.3758037245778	32.8070388389973	32.1482049283506	25.2705055958609	31.7755683209495	30.8875756467977	25.4982619112502	25.8216613293816	32.9983306865722	29.3298774017714	27.7334561182416	27.3593450795325
HORVU1Hr1G035440	12.6419774520875	16.1086546614988	16.6927501148928	25.7954317508971	24.5814229346297	25.7271253820755	11.5555660692389	17.9253206027701	15.9903983802756	12.5134327362774	12.6528204595611	19.8965304238248	17.8655480104502	16.6521404393793	15.3601495543496
HORVU1Hr1G035490	19.2620665910355	20.7566727252854	23.0197297207853	28.0471707457795	27.5777609786801	26.1980045488023	20.7766743467124	21.3253814144532	29.2395856096468	22.9055814984256	29.5576490996598	32.0392659030708	29.3841250171878	30.347922612347	31.0151196375735
HORVU1Hr1G035600	11.6449760757399	9.2121368845446	7.82946495892579	9.77285359683631	6.73698936018967	8.58284299352102	5.83614447941361	8.82515784208905	7.78308166060353	7.37092613232778	7.14172247799043	7.47745424424789	6.00340277274236	5.32948939183032	5.45417978417404
HORVU1Hr1G035650	3.310044569474	2.50019744225345	3.28065609194426	3.56908289665025	4.35136989836613	4.38773768995464	5.48597581064879	3.42506125882776	5.23767130619231	3.49261906851578	3.57086123899522	3.82000379869186	3.77925054067215	3.53958540740429	3.43465916138528
HORVU1Hr1G035720	854.98850030064	717.556665926741	1155.49394209837	1017.32648711644	1156.3765504908	1282.1825673987	4853.39611052515	3316.63431956108	594.989670343622	571.611036139849	1295.93365832552	1185.24151905454	1245.97731342112	1207.90363155744	1052.24394960517
HORVU1Hr1G035740	0.139580192688663	0.251697729085918	0.606507848930871	0.597400141499398	1.01150265181318	0.53508996218959	0.233445779176544	0.350006260026195	0.456868525150731	0.428542216995801	0.412816328207539	0.731490089111206	0.723301538884622	0.382114333753872	0.619123110635972
HORVU1Hr1G035760	0.239280330323422	0.23491788048019	0.261901116583785	0.336994951615045	0.133594689862118	0.0214035984875836	0.204265056779476	0.175003130013097	0.440551792109634	0.299979551897061	0.247689796924524	0.2763407003309	0.216990461665387	0.341891772306096	0.398007713980268
HORVU1Hr1G035930	1.17646162409016	1.10747000797804	1.25436850574339	1.40925161584473	1.01150265181318	1.28421590925502	0.875421671912041	1.02501833293386	1.28902191024671	1.45704353778572	1.05268163692923	1.30042682508659	0.922209462077893	1.24689940488106	1.12031800972224
HORVU1Hr1G035960	7.09864979959485	9.39671521920761	11.702844630507	13.2500287794097	16.6611663213756	14.1905857972679	17.8877828294027	16.4002933269417	13.2981374284945	12.1920260735305	12.7147429087922	15.5726112304119	17.0156687022607	15.264462069431	20.6079549683117
HORVU1Hr1G036040	9.47151307530212	10.9069015937231	13.3293884071853	9.9260331202977	7.80574687908661	7.61968106157976	5.0190842522957	5.80010373757694	8.59891831265841	12.6634225122259	12.2812857641743	14.4184824231476	14.3575355468597	12.3684376451911	15.7139341889987
HORVU1Hr1G036060	7.6170905152956	8.44026384868112	12.2404311329685	10.6766127852585	14.8480955303897	13.1632130698639	13.714939526622	17.2753089770072	13.0697031659191	9.77076254750427	12.7766653580233	16.3041013195231	15.966881470878	15.0432379814682	16.7015829607275
HORVU1Hr1G036120	8.95307235960137	6.1414245896964	4.81070998356532	8.7312328372989	10.706660144664	10.6589920468166	9.65881911342952	8.97516052495742	10.2469083498093	10.7992638682942	11.49693474058	8.30647634524059	7.72124392759334	9.27130041371237	7.01672858720769
HORVU1Hr1G036200	8.01589106583463	5.57090973710165	4.46610325121823	5.88209370091715	6.08810086657366	5.62914640223449	6.4781203721491	5.6751015018533	7.75044819452133	8.84939678096329	7.49261635696684	5.9006867188304	6.47354877301736	7.86351076304021	8.24023378203592
HORVU1Hr1G036340	0.0598200825808555	0.23491788048019	0.620292118224755	0.78121556965306	0.438953980975531	0.385264772776505	0.116722889588272	0.875015650065487	0.407918326027439	0.278552441047271	0.577942859490555	1.34919283102734	0.470146000275004	0.442448175925536	0.869720560179104
HORVU1Hr1G036360	0.338980467958181	0.151018637451551	0.096489885057184	0.122543618769107	0.190849556945883	0.23543958336342	0.379349391161884	0.125002235723641	0.0815836652054877	0.10713555424895	0.309612246155655	0.130042682508659	0.108495230832693	0.20111280723888	0.176892317324564
HORVU1Hr1G036370	0.957121321293688	0.637634247017659	0.771919080457472	1.17948233065266	1.22143716445365	1.32702310623018	0.525253003147225	0.600010731473477	0.652669321643902	0.899938655691183	0.577942859490555	0.715234753797624	0.669053923468275	0.764228667507744	0.368525661092841
HORVU1Hr1G036490	0.259220357850374	0.184578334663007	0.261901116583785	0.566764236807122	0.152679645556706	0.449475568239256	0.233445779176544	0.575010284328749	0.146850597369878	0.0214271108497901	0.144485714872639	0.0325106706271647	0.198907923193271	0.422336895201648	0.250597449543132
HORVU1Hr1G036500	14.1574195441358	19.9344601436047	23.5159634153651	34.1590337318887	21.9667840044711	21.382194889096	5.89450592420774	14.3752571082187	17.899456146084	13.7347780547154	13.3133265846931	16.2228246429552	14.4479482392203	12.1472135572284	10.0681210610564
HORVU1Hr1G036510	0.43868060559294	0.268477577691646	0.248116847289902	0.153179523461384	0.0763398227783532	0.171228787900669	0.233445779176544	0.0500008942894564	0.179484063452073	0.0857084433991602	0.309612246155655	0.0325106706271647	0.0180825384721155	0.140778965067216	0.0884461586622818
HORVU1Hr1G036630	0.0598200825808555	0.335596972114557	0.592723579636988	0.796533521999198	0.78248318347812	0.941758333453678	0.204265056779476	0.675012072907661	0.620035855561707	0.557104882094542	0.536661226669801	0.455149388780306	0.596723769579813	0.482670737373312	0.589641057748545
HORVU1Hr1G036640	24.3667136379351	22.6527956177326	24.0121971099449	35.4610596813105	35.23082821221	33.6250532239938	27.3131561636557	30.8255513294499	37.642703125812	32.3977916048826	29.4544450176079	31.7141591967992	29.2032996324666	31.1724851220264	28.9955990147847
HORVU1Hr1G036670	4.16746575313293	4.63123821518089	4.43853471263047	6.03527322437854	4.75215396795248	4.92282765214423	5.51515653304586	6.52511670477406	4.25866732372646	3.10693107321956	3.15804491078768	2.81217300924975	4.538717156501	3.45914028450874	3.25776684406071
HORVU1Hr1G036720	3.19040440431229	3.02037274903102	4.27312348110387	5.16214994064865	7.48130263227861	5.4793212128214	4.90236136270743	5.0500903232351	4.42183465413743	4.17828661570906	4.64418369233482	5.88443138351682	9.47525015938854	6.47583239309194	10.9525826476792
HORVU1Hr1G036780	0.139580192688663	0.302037274903102	0.413528078816503	0.842487379037613	1.08784247459153	0.53508996218959	0.320987946367748	0.700012520052389	0.261067728657561	0.235698219347691	0.454097961028293	0.650213412543295	0.813714231245199	0.482670737373312	0.692828242854541
HORVU1Hr1G036920	113.319176435667	82.8253327178728	76.0615979636488	50.2582016476802	66.3583909500835	99.1200645959997	46.6599751129118	98.1017545959134	104.394457996942	117.399140346	70.6535145727204	47.5468557922284	92.3475239770941	92.290667241922	60.069682758133
HORVU1Hr1G036940	0.358920495485133	0.268477577691646	0.165411231526601	0.229769285192076	0.267189379724236	0.385264772776505	0.204265056779476	0.325005812881467	0.391601592986341	0.342833773596641	0.185767347693393	0.292596035644483	0.253155538609618	0.30166921085832	0.353784634649127
HORVU1Hr1G036970	5.62308776260041	3.72512639047159	3.69418417076076	3.27804180207362	5.11476812614966	7.23441628880326	1.69248189902995	4.50008048605108	4.58500198454841	4.32827639165759	2.51817960206599	2.04817224951138	3.70692038678369	2.25246344107546	1.28246930060309
HORVU1Hr1G036980	0.518440715700747	0.385936517931741	0.385959540228736	0.536128332114845	0.305359291113413	0.363861174288921	0.817060227117905	0.375006707170923	0.897420317260365	0.471396438695381	0.454097961028293	0.373872712212394	0.813714231245199	0.442448175925536	0.913943639510245
HORVU1Hr1G036990	10.5482745617575	13.4909982790052	20.7866780951762	22.8543849004385	31.1657326492627	28.6166111778993	10.6217829525328	23.3754180803209	22.2723406010982	16.5631566868877	19.0308327303676	25.0169610476033	25.8941950920695	20.8553981106719	25.0450039278695
HORVU1Hr1G037000	10.5482745617575	13.440658733188	20.6074825943557	22.6705694722849	30.8794583138439	28.4025751930234	10.5634215077386	23.2004149503078	22.1091732706872	16.3917398000894	18.9276286483157	24.8544076944674	25.7676173227647	20.7146191456046	24.80914750477
HORVU1Hr1G037090	0.358920495485133	0.453055912354652	0.124058423644951	0.0306359046922768	0.171764601251295	0.0428071969751672	0.0583614447941361	0.0250004471447282	0.163167330410975	0.278552441047271	0.165126531283016	0.666468747856877	0.524393615691351	0.261446649410544	0.383266687536554
HORVU1Hr1G037110	0.279160385377326	0.201358183268734	0.248116847289902	0.306359046922768	3.5879716705826	0.278246780338587	3.50168668764816	4.57508182748526	0.554768923397317	0.449969327845591	4.12816328207539	1.91812956700272	11.3739166989607	12.93155350546	28.5975913008044
HORVU1Hr1G037150	6.10164842324726	7.0475364144057	5.89966725778211	1.73092861511364	2.19476990487765	1.73369147749427	1.98428912300063	1.92503443014407	1.71325696931524	1.2856266509874	2.14664490667921	2.43830029703736	3.79733307914426	3.3585838808893	4.62868230332608
HORVU1Hr1G037160	0.717840990970266	0.838992430286393	0.730566272575822	0.520810379768706	0.343529202502589	0.513686363702006	0.408530113558952	0.300005365736738	0.424235059068536	0.685667547193282	0.247689796924524	0.601447406602548	0.470146000275004	0.462559456649424	0.294820528874273
HORVU1Hr1G037250	4.20734580818683	5.33599185662146	6.91970318552948	6.52544769945497	6.3552902462979	4.62317727331806	3.96857824600125	5.57509971327439	9.77372309161743	6.94238391533198	9.24708575184889	14.711078458792	10.5782850061876	9.49252450167514	9.67011334707614
HORVU1Hr1G037270	0.159520220215615	0.318817123508829	0.0827056157633006	0.0153179523461384	0.0954247784729415	0.321053977313754	0.554433725544293	0.0250004471447282	0	0.0428542216995801	0.0412816328207539	0.0487660059407471	0	0.020111280723888	0.0442230793311409
HORVU1Hr1G037320	1.19640165161711	0.721533490046298	0.785703349751356	0.58208218915326	0.935162829034826	0.684915151602675	0.437710835956021	0.600010731473477	1.81115736756183	1.77845020053258	1.50677959795752	0.95906478350136	1.35619038540867	1.38767836994827	1.12031800972224
HORVU1Hr1G037340	14.7556203699444	12.5513267570844	12.3507052873196	12.4381773050644	7.48130263227861	10.3593416679905	7.79125288001716	6.60011804620824	9.12105376997353	10.2850132078992	10.4648939200611	9.85073320003091	9.4210025439722	9.3919680980557	8.72668765467847
HORVU1Hr1G037350	0.239280330323422	0.285257426297374	0.192979770114368	0.551446284460983	0.343529202502589	0.278246780338587	0.437710835956021	0.375006707170923	0.261067728657561	0.342833773596641	0.371534695386786	0.325106706271647	0.32548569249808	0.30166921085832	0.3243025817617
HORVU1Hr1G037460	6.99894966196009	6.37634247017659	7.30566272575822	14.6745983476006	21.6614247133577	17.786390343182	15.6992286496226	18.5003308870989	19.5148127171527	17.141688679832	17.8955878277968	16.2390799782688	18.0644559336434	20.3325048118508	22.8338499613124
HORVU1Hr1G037500	0.119640165161711	0.335596972114557	0.289469655171552	0.459538570384153	0.744313272088943	0.321053977313754	0.175084334382408	0.450008048605108	0.783203185972682	0.514250660394961	0.495379593849047	0.568936735975383	0.48822853874712	0.945230194022736	0.958166718841386
HORVU1Hr1G037550	15.2740610856451	7.31601399209735	11.3168850902783	10.5693871188355	16.8520158783215	12.4997015167488	10.9427708989005	7.22512922482645	18.3400079381936	19.2415455431115	13.6435796472592	10.8260533188459	8.95085654369719	10.0958629233918	7.4589593805191
HORVU1Hr1G037570	0.757721046024169	0.436276063748925	0.261901116583785	0.168497475807523	0.935162829034826	0.342457575801338	0.233445779176544	0.27500491859201	0.293701194739756	0.257125330197481	0.619224492311309	0.406383382839559	0.886044385133662	0.744117386783856	1.10557698327852
HORVU1Hr1G037580	20.9170888757725	20.2532772671135	18.5398422002732	21.1081383329787	15.8786831378975	19.6270998131142	18.4130358325499	13.9502495067583	16.2677828419743	17.0345531255831	15.0884367959856	15.3775472066489	12.8566848536742	13.8365611380349	12.3824622127194
HORVU1Hr1G037590	21.6548698942697	18.927669227261	15.3418917240923	16.2217115345606	12.748750403985	15.6460304944236	7.47026493364942	13.3002378809954	14.8971772665221	14.4632998236083	12.59089801033	12.532863526772	10.3974596214664	11.2623172053773	10.8051723832421
HORVU1Hr1G037610	1.53538211957529	1.37594758566969	0.565155041049221	0.750579664960783	1.12601238598071	1.07017992437918	1.4590361198534	2.17503890159135	0.701619520767194	0.685667547193282	0.866914289235833	0.731490089111206	1.15728246221539	1.38767836994827	1.20876416838452
HORVU1Hr1G037640	0.0797601101078073	0.23491788048019	0.317038193759319	0.459538570384153	0.820653094867297	0.29965037882617	0.350168668764816	0.300005365736738	1.22375497808232	0.921365766540973	1.30037143385375	1.91812956700272	0.904126923605777	0.764228667507744	0.722310295741968
HORVU1Hr1G037650	45.2439224586537	59.3335446698537	57.4666186862	42.04777919015	41.3189290787836	39.7892895884179	44.9966739362789	44.7508003890635	40.3675975436753	31.4549987274918	43.4695593602539	39.1591027704199	54.9528344167591	40.222561447776	63.4453778137435
HORVU1Hr1G037730	8.17541128605025	7.68517066142336	9.20789188831414	12.17777211518	11.6036530623097	11.9004007590965	10.8844094541064	11.6002074751539	12.1070159164944	12.1277447409812	12.0748776000705	11.7200967610929	9.60182792869335	8.82885223778683	8.2254927555922
HORVU1Hr1G037750	0.977061348820639	0.453055912354652	0.275685385877669	0.444220618038014	0.610718582226825	0.684915151602675	1.05050600629445	0.675012072907661	0.571085656438414	0.428542216995801	0.660506125132063	0.390128047525977	0.433980923330773	0.683783544612192	0.456971819755123
HORVU1Hr1G037760	6.69984924905581	5.10107397614127	3.23930328406261	5.05492427422568	9.37071324604285	4.21650890205397	13.2188672458718	14.5252597910871	20.9670019578103	30.7264769585989	57.3401879880272	38.0374846337827	14.1405450851944	21.0565109179107	42.5426023165575
HORVU1Hr1G037800	38.902993705083	37.6875399684648	39.4643629883883	37.5289832480391	32.1390653896867	34.3741791710593	48.031469065574	31.4755629552128	34.6730577123323	32.4192187157324	29.5989307324806	32.2180745915202	29.1309694785781	33.9880644233707	36.9557532943901
HORVU1Hr1G037810	15.9320819940345	14.8837257132806	14.5561883743409	18.2283632919047	12.8060052710687	12.2642619333854	6.41975892735497	6.00010731473477	13.2328704963301	9.81361676920385	8.3388898297923	13.313119621824	10.6867802370203	9.07018760647349	8.57927739024133
HORVU1Hr1G037820	0.319040440431229	0.671193944229115	0.868408965514656	0.796533521999198	0.763398227783532	0.813336742528177	0.758698782323769	0.375006707170923	0.587402389479512	0.471396438695381	0.619224492311309	0.89404344224703	0.506311077219235	0.382114333753872	0.560159004861118
HORVU1Hr1G037870	0.618140853335507	0.520175306777564	0.372175270934853	0.474856522730291	0.286274335418824	0.385264772776505	1.72166262142701	0.925016544354943	0.489501991232926	0.449969327845591	0.763710207183948	0.373872712212394	0.343568230970195	0.422336895201648	0.574900031304832
HORVU1Hr1G037900	1.37586189935968	1.20814909961241	1.73681793102931	1.13352847361424	0.992417696118591	0.963161931941262	0.496072280750157	2.32504158445972	0.913737050301463	1.56417909203467	1.3416530666745	0.926554112874195	0.777549154300968	1.14634300126162	1.48884367081508
HORVU1Hr1G037910	0.199400275269518	0.335596972114557	0.234332577996018	0.0919077140768305	0.0954247784729415	0.128421590925502	0	0.100001788578913	0.146850597369878	0.321406662746851	0.123844898462262	0.146298017822241	0.0723301538884622	0.10055640361944	0.280079502430559
HORVU1Hr1G037960	0.0199400275269518	0.134238788845823	0.151626962232718	0.107225666422969	0.0763398227783532	0	0.0583614447941361	0.125002235723641	0.146850597369878	0.12856266509874	0.288971429745278	0.162553353135824	0.16274284624904	0.30166921085832	0.0884461586622818
HORVU1Hr1G038000	0.259220357850374	0.369156669326013	0.275685385877669	0.137861571115246	0.152679645556706	0.214035984875836	0.262626501573612	0.250004471447282	0.179484063452073	0.449969327845591	0.20640816410377	0.146298017822241	0.108495230832693	0.181001526514992	0.368525661092841
HORVU1Hr1G038010	21.2161892886767	18.1725760400033	28.1336936288161	17.9832760543665	16.2031273847055	17.8077939416696	21.5353731290362	26.1004668190962	15.3703625247139	14.3133100476598	20.0009511016553	14.0771203815623	11.9525579300684	16.3906937899687	21.3450062904973
HORVU1Hr1G038020	1.41574195441358	1.20814909961241	1.73681793102931	1.16416437830652	1.12601238598071	0.984565530428846	0.700337337529633	2.35004203160445	0.946370516383658	1.64988753543383	1.54806123077827	0.910298777560613	0.831796769717315	1.14634300126162	1.54780777658993
HORVU1Hr1G038030	2.59220357850374	2.66799592831073	3.40471451558921	3.00231865984313	2.55738406307483	3.36036496255063	2.13019273498597	3.30005902310412	2.30065935879475	1.79987731138237	2.6007428677075	2.42204496172377	1.93483161651636	2.1720183181799	2.2701180723319
HORVU1Hr1G038040	3.88830536775561	3.02037274903102	2.9084808210094	3.64567265838094	2.91999822127201	3.03931098523687	6.3030360377667	5.40009658326129	4.20971712460317	3.96401550721116	5.201485735415	3.54366309836096	2.49539030915194	4.08258998694926	3.81792584892183
HORVU1Hr1G038060	41.6945975588563	47.0339156418552	55.6333108701135	81.6140501002255	45.5176193315931	49.6991556881691	27.9551320563912	49.6508880294302	34.1346055219761	29.3551418642124	24.1084735673203	29.698497617915	45.2967588726494	53.0736698303404	61.4848212967295
HORVU1Hr1G038070	32.7814052543088	30.1030483986758	35.6047675861009	45.4177287063004	26.5090034597831	32.2338193223009	22.8193249145072	30.075537915108	27.0205099160575	24.1269268168636	17.2350817026648	19.343849023163	27.9375219394185	35.9589699343117	36.5430045539661
HORVU1Hr1G038120	42.0335780268144	26.881317466376	22.7991814120832	24.1564108498603	103.287780219112	81.8901678134949	91.6274683267936	56.9260181485461	59.3276413374307	70.4951946958093	54.2647063428811	41.841233097161	58.4608468803495	74.8340755735873	46.5226794563602
HORVU1Hr1G038130	22.7914514633059	15.9408561754415	13.2191142528342	15.3639062031768	65.7285874121621	51.4970579611261	48.3524570119417	33.2755951496332	33.3024521368801	40.6043750603522	32.0345470689051	24.9194290357218	36.2374070981195	44.8079334528225	27.5362373968571
HORVU1Hr1G038150	0.0598200825808555	0.0838992430286393	0	0.0919077140768305	0.305359291113413	0.0428071969751672	0.175084334382408	0.0500008942894564	0.261067728657561	0.192843997648111	0.185767347693393	0.195064023762988	0.452063461802889	0.261446649410544	0.427489766867695
HORVU1Hr1G038180	21.7146899768505	38.0902563350023	50.3539357305562	70.5544885063136	43.5900388064397	38.9331456489146	11.1178552332829	19.6003505614669	59.7518763964992	47.4824776431348	45.5336410012916	79.8462070603166	49.2749173365149	37.0047565319539	35.9681045226613
HORVU1Hr1G038210	23.4095923166414	26.7135189803188	32.2138373398056	45.7087698008771	43.3610193381046	33.0043488678539	32.4489633055397	31.4005616137786	44.6915317995662	36.9189119941883	32.633130744806	44.1494907116897	30.6137376332916	30.1065872436603	36.8673071357278
HORVU1Hr1G038220	4.60614635872587	3.94326442234605	3.45985159276474	3.56908289665025	3.01542299974495	3.53159375045129	4.55219269394261	3.92507020172233	5.05818724274024	5.67818437519437	5.09828165336311	4.73030257625247	4.01432354080965	4.84681865445701	4.09800535135239
HORVU1Hr1G038230	0.21934030279647	0.218138031874462	0.151626962232718	0.0612718093845537	0.171764601251295	0.214035984875836	0.233445779176544	0.27500491859201	0.407918326027439	0.621386214643912	0.165126531283016	0.292596035644483	0.632888846524044	0.281557930134432	0.353784634649127
HORVU1Hr1G038240	5.80254801034298	6.17498428690786	5.56884479472891	6.66330927057021	5.30561768309554	6.24985075837441	5.92368664660481	6.32511312761623	7.06514540679524	6.29957058983828	7.76094697030174	7.72128427395162	6.23847577287986	6.49594367381582	6.63346189967113
HORVU1Hr1G038260	0.458620633119892	0.385936517931741	0.385959540228736	0.428902665691876	0.438953980975531	0.385264772776505	0.525253003147225	0.175003130013097	0.277384461698658	0.214271108497901	0.495379593849047	0.2763407003309	0.253155538609618	0.261446649410544	0.294820528874273
HORVU1Hr1G038270	23.4295323441684	19.0451281675011	19.6839365516655	20.9090049524789	19.5811645426476	20.868508525394	26.8754453276997	19.1003416185723	22.2560238680571	22.048497064434	19.6294164062685	19.2625723465951	22.1872747052858	23.8720902192551	25.3693065096312
HORVU1Hr1G038280	26.8791571063311	29.5660932432925	35.5634147782193	38.6778296739995	43.8763131418585	35.4871662924136	27.9259513339941	30.3005419394106	45.4747349855389	38.8473519706694	40.9307389417775	48.8960486232558	41.4270956396167	45.3308267516436	50.5027565961629
HORVU1Hr1G038330	19.9001474718979	27.8545486855083	13.94968052541	8.42487379037613	7.04234865130308	5.11546003853248	5.36925292106052	5.65010105470857	11.5522469930971	13.0705376183719	9.12324085338662	18.2384862218394	15.2074148550492	11.6846541005789	7.94541325316165
HORVU1Hr1G038370	9.29205282755955	11.9808119044897	13.1088400984831	16.926337342483	22.9592017005897	19.3488530327756	12.8395178547099	20.7253706829797	13.8692230849329	14.8061335972049	15.0058735303441	17.8483581743134	22.4223477054233	18.1805977743948	21.8167191366962
HORVU1Hr1G038410	12.7616176172492	11.594875386558	16.1000265352559	18.1211376254818	16.9856105681836	14.4260253806313	18.442216554947	9.15016365497052	19.8411473779746	16.8631362387848	13.4578122995658	16.6942293670491	13.453408623254	15.5460199995654	16.6868419342838
HORVU1Hr1G038500	0.378860523012085	0.385936517931741	0.468665155992037	0.122543618769107	0.0954247784729415	0.0642107954627508	0.0583614447941361	0.150002682868369	0.0979003982465853	0.12856266509874	0.47473877743867	0.178808688449406	0.433980923330773	0.382114333753872	0.368525661092841
HORVU1Hr1G038510	0.159520220215615	0.134238788845823	0.096489885057184	0.0765897617306921	0.0572548670837649	0	0	0	0.505818724274024	0.257125330197481	0.123844898462262	0.162553353135824	0.126577769304809	0.10055640361944	0.0294820528874273
HORVU1Hr1G038560	2.1535229729108	1.07391031076658	1.13031008209844	1.04162075953741	1.31686194292659	1.77649867446944	0.729518059926701	1.62502906440733	1.01163744854805	1.2856266509874	1.15588571898111	1.39795883696808	1.12111738527116	0.623449702440528	0.825497480847963
HORVU1Hr1G038620	39.0824539528256	46.0942441199345	51.442893004773	41.3278354298815	32.3489999023272	44.3696596647608	24.0740959775811	24.1754323889522	34.0693385898117	31.0907378430454	31.539167475056	31.4215631611547	42.9641114097465	42.2135782394409	53.893192678217
HORVU1Hr1G038670	0.119640165161711	0.285257426297374	0.206764039408252	0.245087237538215	0.267189379724236	0.149825189413085	0	0.250004471447282	0.228434262575366	0.0857084433991602	0.20640816410377	0.34136204158523	0.32548569249808	0.30166921085832	0.309561555317986
HORVU1Hr1G038680	17.6868044164063	23.9616238089794	27.8580082429384	38.2029731512692	47.7696441035545	40.3671867475827	13.5398551922396	20.3003630815193	35.2278266357296	25.8839499065464	23.4686082585986	36.9971431737135	27.2684680159502	20.6140627419852	16.6868419342838
HORVU1Hr1G038700	3.11064429420448	3.25529062951121	4.19041786534056	5.16214994064865	5.17202299323343	3.33896136406304	4.58137341633968	2.82505052735429	6.29825895386365	6.83524836108303	4.12816328207539	7.23362421454415	6.79903446551544	7.541730271458	7.25258501030711
HORVU1Hr1G038750	4.06776561549817	4.06072336258614	2.63279543513174	3.76821627715005	4.25594511989319	4.55896647785531	8.43322877275266	4.02507199030124	3.62231473512366	4.13543239400948	4.06624083284426	2.38953429109661	3.12827915567599	3.05691467003098	2.72708989208702
HORVU1Hr1G038800	6.28110867098983	4.8158165498439	4.45231898192435	4.16648303814965	2.36653450612895	2.7396606064107	4.05612041319246	2.60004650305173	3.52441433687707	3.55690040106515	3.21996736001881	2.763407003309	1.91674907804425	2.21224087962768	1.79840522613306
HORVU1Hr1G038820	11.0268352224044	15.4039010200582	15.8105568800843	18.3509069106738	16.4512318087351	17.5081435628434	10.0089877821943	15.5502781240209	14.1466075466316	12.556286957977	12.7353837252026	14.9223978178686	14.6649387008857	13.3740016813855	12.456167344938
HORVU1Hr1G038840	5.18440715700747	6.25888352993649	6.8232133004723	7.3372991738003	6.64156458171673	7.42704867519151	5.34007219866345	6.20011089189259	6.28194222082255	6.0424452596408	4.9331551220801	5.60809068318592	5.73216469566063	6.13394062078584	4.82031564709436
HORVU1Hr1G038850	46.1013436423126	54.4170490283755	57.2047175696163	53.0920228317158	57.6747361090458	54.6005797418258	65.7149868381972	57.8260342457563	55.2158246110741	55.9461864288018	50.9621757172208	51.025497549335	60.8658244971409	60.2735083294923	70.4326243480637
HORVU1Hr1G038870	0.259220357850374	0.78865288446921	0.0827056157633006	0.0765897617306921	0.0763398227783532	0.128421590925502	0.29180722397068	0.125002235723641	0.114217131287683	0.14998977594853	0.0619224492311309	0.162553353135824	0.198907923193271	0.221224087962768	0.0884461586622818
HORVU1Hr1G038880	12.2631169290754	10.1182487092539	13.3707412150669	20.4954202391332	22.3293981626683	21.1895625027078	8.98766249829695	12.9752320681139	13.4449880258644	10.1350234319507	9.92823269339132	11.6063094138978	12.6396943920088	11.6846541005789	10.9378416212355
HORVU1Hr1G038890	65.4431703434559	50.8932808211726	43.5858595072594	38.4327424364613	33.6849468009483	43.5777265207202	66.6195892325063	43.0757704303667	46.5190059001691	62.2243299077903	53.3358696044141	46.8153657031172	52.4936091845514	56.733922922088	57.5637082627017
HORVU1Hr1G038950	0.319040440431229	0.436276063748925	0.110274154351067	0.0459538570384153	0.209934512640471	0.107017992437918	0	0.0250004471447282	0.0979003982465853	0.342833773596641	0.103204082051885	0.113787347195077	0.253155538609618	0.140778965067216	0.353784634649127
HORVU1Hr1G038990	12.402697121764	9.73231219132216	10.9171412807557	10.7685204993353	12.9395999609309	9.48179412999954	13.4814937474454	9.02516141924688	13.1839202972068	14.6132895995568	13.8087061785422	11.0373726779224	16.1296243171271	14.7415687706099	18.8095497421786
HORVU1Hr1G039000	14.077659434028	15.6052592033269	18.4571365845099	19.5303892413265	21.2988105551605	20.2049969722789	13.2480479682689	14.6002611325213	17.7036553495908	15.6846451420463	16.3681674134289	17.1006127498887	17.0337512407328	15.8476892104237	14.8147315759322
HORVU1Hr1G039010	0.319040440431229	0.419496215143197	0.523802233167571	0.352312903961184	0.305359291113413	0.363861174288921	0.262626501573612	0.200003577157826	0.195800796493171	0.321406662746851	0.185767347693393	0.34136204158523	0.253155538609618	0.442448175925536	0.48645387264255
HORVU1Hr1G039050	39.0425738977717	38.3419540640882	36.8039990146688	44.8969183265317	37.2156636044472	41.0735054976729	25.5914935422287	33.850605433962	34.8035915766611	36.8117764399393	33.3555593191692	35.3716096423552	32.5847343267522	36.1198601801028	28.258547692599
HORVU1Hr1G039090	7.05876974454095	7.29923414349162	7.73297507386861	10.2630280719127	8.60731501825932	8.00494583435627	7.14927698728167	6.05010820902422	7.78308166060353	9.36364744135826	8.40081227902343	8.42026369243567	6.96177731176448	7.56184155218189	7.60636964495623
HORVU1Hr1G039140	0.0598200825808555	0.0167798486057279	0.096489885057184	0.168497475807523	0.11450973416753	0.214035984875836	0.379349391161884	0.200003577157826	0.163167330410975	0.10713555424895	0.123844898462262	0.113787347195077	0.216990461665387	0.140778965067216	0.235856423099418
HORVU1Hr1G039150	0.737781018497218	1.24170879682386	0.413528078816503	0.260405189884353	0.419869025280942	0.171228787900669	0.233445779176544	0.27500491859201	2.17012549446597	3.04264974067019	2.02280000821694	0.812766765679118	0.614806308051928	0.90500763257496	0.294820528874273
HORVU1Hr1G039160	38.6836534022865	28.6767612671889	25.4733296550966	18.7185377669812	14.9626052645572	18.6211306841977	44.0628908195727	25.9504641362279	19.6616633145225	22.9055814984256	24.4387266298863	24.5780669941365	23.9955285524973	23.4497533240534	27.1234886564331
HORVU1Hr1G039220	2.81154388130021	1.24170879682386	1.39221119868223	2.58873394649739	1.60313627834542	1.26281231076743	1.25477106307393	0.9750174386444	1.28902191024671	1.47847064863551	0.371534695386786	0.438894053466724	0.922209462077893	0.5027820180972	0.456971819755123
HORVU1Hr1G039230	5.88230812045079	8.00398778493219	9.60763569783675	9.71158178745176	10.6494052775803	8.90389697083478	9.68799983582659	10.1251810936149	10.5569262775901	8.91367811351267	9.37093065031115	12.1589908145596	9.54758031327701	9.3919680980557	10.3039774841558
HORVU1Hr1G039250	0.119640165161711	0.620854398411931	0.813271888339123	0.413584713345737	40.4791910282218	1.00596912891643	19.6094454508297	14.5752606853765	4.40551792109634	7.92803101442232	85.8245146343475	38.6064213697581	207.28013850586	129.134533528085	294.835269900716
HORVU1Hr1G039260	22.8512715458868	21.2432883348515	23.6124533004223	18.1058196731356	14.1228672139953	14.1691821987803	19.1717346148737	12.7502280438114	14.2445079448782	15.513228255248	17.358926601127	16.2390799782688	18.8781701648886	17.4968142297826	18.1167214993241
HORVU1Hr1G039370	3.40974470710876	3.70834654186586	4.0801437109895	2.74191346995878	3.56888671488801	4.10949090961605	3.4725059652511	3.17505678738048	3.00227887956195	2.27127375007775	2.3324122543726	2.66587499142751	2.80279346317791	2.57424393265766	1.48884367081508
HORVU1Hr1G039480	0.0398800550539036	0.0335596972114557	0.0827056157633006	0.214451332845938	0.171764601251295	0.107017992437918	0.0875421671912041	0.200003577157826	0.0979003982465853	0.10713555424895	0.103204082051885	0.146298017822241	0.253155538609618	0.120667684343328	0.0737051322185681
HORVU1Hr1G039540	55.5728567176147	93.8161335546245	90.8521189159857	41.6801483338426	34.0666459148401	34.3741791710593	42.4287703653369	36.6756559613163	31.6870955658114	26.5481903428899	33.2523552371173	51.2530722437252	25.4782967072108	26.8686710471144	29.3199015965464
HORVU1Hr1G039570	0.677960935916362	1.56052592033269	3.10146059112377	4.02862146703441	3.77882122752848	2.8680821973362	0.787879504720837	2.27504069017027	3.08386254476744	2.39983641517649	2.3324122543726	4.53523855248948	3.70692038678369	2.73513417844877	3.75896174314698
HORVU1Hr1G039600	19.0826063432929	17.8034193706773	12.5988221346095	8.25637631456861	7.93934156894873	7.98354223586868	6.33221676016376	8.55015292349704	13.4449880258644	12.6848496230757	8.79298779082059	11.3787347195077	9.60182792869335	11.1215382403101	7.1346567987574
HORVU1Hr1G039610	0.558320770754651	0.70475364144057	1.30950558291893	1.50115932992157	0.858823006256473	1.19860151530468	2.13019273498597	1.17502101580223	0.73425298684939	0.642813325493702	0.536661226669801	1.12161813663718	0.904126923605777	0.784339948231632	0.987648771728813
HORVU1Hr1G039620	1.49550206452139	1.27526849403532	2.31575724137242	2.74191346995878	1.66039114542918	2.16176344724594	1.40067467505927	2.67504784448592	1.71325696931524	1.2856266509874	1.03204082051885	1.9343849023163	1.57318084707405	2.03123935311269	1.40039751215279
HORVU1Hr1G039670	0.338980467958181	0.486615609566108	0.289469655171552	0.398266760999599	0.381699113891766	0.385264772776505	0.379349391161884	0.350006260026195	0.881103584219267	1.17849109673845	0.804991840004702	0.61770274191613	0.904126923605777	1.0055640361944	0.412748740423982
HORVU1Hr1G039700	4.04782558797122	4.5137792749408	4.96233694579804	5.46850898757142	5.63006192990355	5.65055000072207	6.27385531536963	4.50008048605108	5.80875696263073	6.38527903323744	5.44917553233952	6.66468747856877	5.62366946482793	6.09371805933806	5.15935925529977
HORVU1Hr1G039720	34.4164875115189	49.5173332355029	38.5683854842858	22.1650770448623	12.9205150052363	12.028822350022	7.64534926803182	13.6002432467321	33.1066513403869	35.0976075719561	24.4387266298863	22.5298947446252	22.0064493205646	15.6465764031849	7.26732603675082
HORVU1Hr1G039790	40.0794553291732	40.7750321119187	49.8163492280947	56.1862492056357	59.5832316785046	61.2785024699519	37.1470596114676	47.550850469273	56.3416791909098	51.5322015937451	39.258832812537	43.8894053466724	42.9098637943302	43.0180294683964	38.0171071983374
HORVU1Hr1G039820	0.0797601101078073	0	0	0.0459538570384153	8.72182475242685	1.13439071984193	0.641975892735497	1.12502012151277	0.0979003982465853	0.0857084433991602	0.928836738466964	0.926554112874195	1.37427292388078	0.30166921085832	0.501194899086263
HORVU1Hr1G039830	0.0199400275269518	0.0335596972114557	0.0275685385877669	0	2.42378937321271	0.0642107954627508	0	0.0250004471447282	11.7806812556724	17.5059495642785	21.8379837621788	17.6045281446097	28.7512361706637	21.7805170239707	10.1713082461624
HORVU1Hr1G039870	42.0136379992875	34.4154694903479	33.4957743841367	26.7451447963577	20.210968080569	23.8650123136557	24.1032766999782	19.4753483257433	21.0975358221391	25.3482721353016	18.6386572185704	17.1331234205158	14.3032879314434	15.1639056658116	11.2768852294409
HORVU1Hr1G039880	8.25517139615806	12.7191252431417	17.0097883086522	16.9876091518675	17.0428654352673	17.7649867446944	11.4388431796507	17.8503192613359	13.0044362337547	9.40650166305784	10.9396326974998	15.7351645835477	13.7065641618636	14.1382303488933	13.1047725084614
HORVU1Hr1G039930	0	0.0671193944229115	0.124058423644951	0.260405189884353	0.152679645556706	0.0856143939503344	0	0.125002235723641	0.146850597369878	0	0.144485714872639	0.34136204158523	0.235073000137502	0.040222561447776	0.250597449543132
HORVU1Hr1G040050	8.87331224949356	8.50738324310403	9.51114581277957	11.9173669252957	11.2219539484179	10.3593416679905	7.52862637844355	7.65013682628683	8.74576891002828	8.01373945782148	9.55669799800454	10.7447766422779	12.042970622429	11.9662120307134	15.492818792343
HORVU1Hr1G040110	5.4635675423848	5.0003948845069	4.42475044333658	6.38758612833972	7.57672741075155	7.34143428124118	4.14366258038366	5.40009658326129	7.9788824570967	8.74226122671434	7.12108166158006	5.77064403632174	4.82803777205485	4.80659609300923	4.06852329846496
HORVU1Hr1G040130	0.498500688173796	0.604074549806203	0.730566272575822	1.25607209238335	1.01150265181318	0.963161931941262	0.933783116706177	0.775013861486574	0.881103584219267	0.835657323141812	1.05268163692923	1.21915014851868	0.795631692773084	0.844673790403296	0.427489766867695
HORVU1Hr1G040160	20.0596676921135	25.1865527571975	20.7177567487068	23.4517850419379	24.4096583333784	28.6166111778993	40.4153005199392	34.9256246611853	17.3773206887689	18.0202002246734	24.2529592821929	24.36674763506	30.2340043253772	31.1121512798547	36.1744788928732
HORVU1Hr1G040170	9.25217277250565	11.4270769005007	9.29059750407744	10.4927973571048	11.0120194357774	13.6768994335659	18.9382888356972	16.5252955626653	7.3098964024117	7.99231234697169	10.5061755528819	10.8097979835323	12.6216118535366	12.4891053295344	14.1366443595214
HORVU1Hr1G040180	0.239280330323422	0.318817123508829	0.275685385877669	0.229769285192076	0.400784069586354	0.171228787900669	0.029180722397068	0.400007154315651	0.358968126904146	0.578531992944332	0.866914289235833	0.633958077229712	1.46468561624136	1.64912501935882	2.2701180723319
HORVU1Hr1G040200	0.638080880862458	1.27526849403532	1.22679996715563	1.17948233065266	1.33594689862118	1.41263750018052	0.437710835956021	1.22502191009168	1.20743824504122	0.985647099090343	1.11460408616036	1.95064023762988	2.27839984748656	1.48823477356771	2.15218986078219
HORVU1Hr1G040250	2.79160385377326	3.90970472513459	4.30069201969163	4.64133956087994	5.97359113240613	4.68738806878081	2.45118068135371	5.20009300610347	4.48710158630182	4.24256794825843	5.03635920413198	6.29081476635638	7.05219000412506	5.59093604124086	6.486051635234
HORVU1Hr1G040260	0.319040440431229	0.369156669326013	0.48244942528592	0.49017447507643	0.744313272088943	0.642107954627508	0.14590361198534	0.600010731473477	0.407918326027439	0.385687995296221	0.639865308721686	0.666468747856877	0.741384077356737	0.382114333753872	0.48645387264255
HORVU1Hr1G040300	0.119640165161711	0.151018637451551	0.151626962232718	0.1991333804998	0.286274335418824	0.0428071969751672	0.204265056779476	0.500008942894564	0.0979003982465853	0.14998977594853	0.103204082051885	0.227574694390153	0.216990461665387	0.181001526514992	0.206374370211991
HORVU1Hr1G040330	0.378860523012085	0.167798486057279	0.096489885057184	0.137861571115246	0.133594689862118	0.0856143939503344	0.262626501573612	0.125002235723641	0.195800796493171	0.10713555424895	0.103204082051885	0.227574694390153	0.16274284624904	0.160890245791104	0.235856423099418
HORVU1Hr1G040420	0	0	0.0413528078816503	0	0.992417696118591	0	0.14590361198534	1.57502817011788	0	0.0214271108497901	0.330253062566032	0.2763407003309	1.46468561624136	4.70603968938979	5.91115160392917
HORVU1Hr1G040450	23.3098921790067	32.1669697771803	36.9418417076076	42.2622305229959	44.3534370342232	44.5194848541739	32.3030596935543	42.8507664060641	30.5286075198935	29.0765894231651	27.431645009391	32.9007986746907	41.0473623317023	36.3611955487895	38.7688995469668
HORVU1Hr1G040540	0.757721046024169	1.30882819124677	1.62654377667825	1.50115932992157	1.52679645556706	1.28421590925502	1.10886745108859	0.55000983718402	1.37060557545219	1.11420976418908	0.825632656415079	1.15412880726435	1.50085069318559	0.945230194022736	0.781274401516822
HORVU1Hr1G040560	51.8041915150208	69.0155173153587	75.0829148437831	89.3802519397177	66.7591750196698	64.1465846672881	22.2065297441688	36.6006546198821	51.5445596768271	41.9757101547387	38.2474328084285	57.9990363988619	55.6038058017553	42.8571392226053	44.783238336002
HORVU1Hr1G040620	2.11364291785689	1.27526849403532	0.44109661740427	0.352312903961184	0.11450973416753	0.0856143939503344	0.0875421671912041	0	0	0.14998977594853	0.0412816328207539	0.0325106706271647	0.144660307776924	0.040222561447776	0.0294820528874273
HORVU1Hr1G040660	32.8013452818358	32.4522272034777	37.8791720195917	45.8313134196462	52.5790529385907	51.711093946002	48.906890737486	48.0508594121676	49.3091672501968	51.5536287045949	53.6248410341594	46.4089823202777	47.1773428737495	42.917473064777	37.2210917703769
HORVU1Hr1G040670	14.1972995991897	20.8741316655255	24.0121971099449	29.5789659803933	18.913191093337	19.9695573889155	10.7968672869152	18.7753358056909	15.0277111308508	12.5348598471272	15.9140694524006	20.0103177710199	14.8095990086626	12.5896617331539	12.2940160540572
HORVU1Hr1G040700	5.66296781765432	7.81940945026919	12.8469389818994	11.5497360689884	10.8402548345261	7.76950625099285	5.57351797783999	8.92515963066797	8.74576891002828	6.87810258278261	6.19224492311309	9.62315850564076	9.96347869813567	7.82328820159243	11.6454108905338
HORVU1Hr1G040720	17.2680638383403	22.6360157691269	28.4783003611632	9.57372021633651	12.0807769546744	10.380745266478	11.3804817348565	11.6752088165881	14.048707148385	20.0129215337039	22.2714409067968	16.1252926310737	29.2032996324666	22.3838554456873	33.6979864503294
HORVU1Hr1G040850	13.2999983604769	11.7291141754038	11.8544715927398	9.69626383510562	8.09202121450543	6.59230833417575	5.77778303461947	5.40009658326129	7.45674699978158	8.44228167481728	7.86415105235363	8.84290241058881	9.6560755441097	8.5472943076524	11.0852518856726
HORVU1Hr1G040920	0.697900963443314	0.503395458171836	0.289469655171552	0.566764236807122	0.515293803753884	0.449475568239256	0.641975892735497	0.350006260026195	1.17480477895902	1.43561642693593	1.09396326974998	0.829022100992701	0.560558692635582	0.724006106059968	0.589641057748545
HORVU1Hr1G040930	24.9050943811628	22.4682172830696	25.7490150409743	24.5546776108599	21.9286140930819	24.9351922380349	25.8833007661993	20.2253617400851	23.7245298417558	25.7768143522974	20.7233796760185	21.1156805723435	18.0463733951713	21.9615185504857	18.0577573935492
HORVU1Hr1G040940	1.73478239484481	2.66799592831073	2.59144262725009	3.20145204034293	2.74823362002071	1.99053465934527	1.22559034067686	1.02501833293386	2.006958164055	1.52132487033509	1.54806123077827	2.4870663029781	2.35073000137502	1.56867989646326	1.16454108905338
HORVU1Hr1G040950	0.777661073551121	0.620854398411931	0.44109661740427	0.536128332114845	0.477123892364707	0.321053977313754	0.554433725544293	0.650011625762933	0.832153385095975	1.0713555424895	0.908195922056587	0.731490089111206	0.741384077356737	1.06589787836606	1.50358469725879
HORVU1Hr1G040970	0.139580192688663	0.251697729085918	0.124058423644951	0.29104109457663	0.11450973416753	0.192632386388252	0	0.0750013414341846	0.0652669321643902	0.0214271108497901	0.0619224492311309	0.0650213412543295	0.0723301538884622	0	0
HORVU1Hr1G040980	24.2670135003004	29.5828730918982	36.2112754350318	34.1437157795425	28.6083485861878	26.4762513291409	20.3973249555506	25.6004578762017	25.4541035441122	22.3056223946315	22.4778490709005	33.6973101050562	29.8542710174628	27.4518981881071	32.4449992026137
HORVU1Hr1G041020	1.17646162409016	0.822212581680665	0.730566272575822	0.796533521999198	0.954247784729415	0.813336742528177	0.992144561500313	1.37502459296005	1.3053386432878	1.0713555424895	1.58934286359903	2.16195959670645	1.57318084707405	1.36756708922438	1.5183257237025
HORVU1Hr1G041030	13.240178277896	13.1386214582849	17.8368444662852	23.68155432713	21.2415556880768	19.5414854191638	14.6195419209311	15.0002682868369	20.412233034413	16.5845837977375	15.0265143467544	18.4985715868567	15.7498910092126	16.2901373863493	17.5565624944629
HORVU1Hr1G041060	36.2110899889445	36.6807490521211	43.8064078159616	51.8053148346401	56.3006192990355	48.6503793622775	43.7710835956021	47.8758562821545	51.8382608715669	51.4679202611957	47.0404205992491	57.332567651005	62.4209228057429	53.2948939183032	55.8832312481184
HORVU1Hr1G041110	3.48950481721657	4.49699942633507	3.95608528734455	4.35029846630331	4.27503007558778	4.08808731112847	3.67677102203057	4.20007512031434	3.23071314213731	3.53547329021536	2.91035511386315	3.0397477036399	5.13544092608081	3.78092077609094	5.58684902216747
HORVU1Hr1G041150	15.4734613609146	22.5017769802811	34.1436350409493	38.402106531769	35.8033768830476	28.7450327688248	18.7923852237118	27.4504909649116	24.3771991633997	17.9344917812743	22.2095184575656	32.0230105677573	29.583032940381	24.7167640096584	28.1701015339367
HORVU1Hr1G041220	6.34092875357068	4.12784275700906	5.66533467978609	6.95435036514684	5.64914688559813	5.56493560677174	5.28171075386931	2.90005186878847	6.6409103477267	6.44956036578681	5.30468981746688	6.64843214325519	3.9600759253933	4.12281254839704	3.71473866381583
HORVU1Hr1G041250	418.660817955881	323.616160210068	295.190126928514	299.282152938853	246.921156776583	296.696682234884	310.541247749598	236.229225070537	201.837987718377	253.611284018115	240.011413219863	204.557139586121	237.062079369435	238.258342735901	212.388709001026
HORVU1Hr1G041280	0.558320770754651	0.486615609566108	0.261901116583785	0.137861571115246	0.0954247784729415	0.0214035984875836	0.175084334382408	0	0.163167330410975	0.235698219347691	0.309612246155655	0.0650213412543295	0.198907923193271	0.040222561447776	0.103187185105995
HORVU1Hr1G041320	0.159520220215615	0.822212581680665	1.18544715927398	1.42456956819087	1.88941061376424	1.81930587144461	0.320987946367748	1.75003130013097	1.06058764767134	1.11420976418908	1.0733224533396	0.95906478350136	1.17536500068751	1.12623172053773	0.840238507291677
HORVU1Hr1G041440	5.08470701937272	4.63123821518089	5.80317737272493	5.43787308287914	4.82849379073084	4.21650890205397	5.13580714188397	4.37507825032743	6.42879281819243	6.77096702853366	6.08904084106121	4.63277056437097	4.068571156226	4.42448175925536	3.99481816624639
HORVU1Hr1G041480	0.119640165161711	0.369156669326013	0.510017963873687	0.934395093114444	0.89699291764565	0.428071969751672	0.0875421671912041	0.525009390039292	0.277384461698658	0.321406662746851	0.371534695386786	0.796511430365536	0.886044385133662	0.281557930134432	0.574900031304832
HORVU1Hr1G041490	0.299100412904277	0.55373500398902	0.951114581277957	1.28670799707563	1.1450973416753	0.727722348577842	0.204265056779476	0.650011625762933	0.473185258191829	0.407115106146011	0.536661226669801	1.02408612475569	1.3923554623529	0.563115860268864	0.899202613066531
HORVU1Hr1G041500	0.0199400275269518	0.134238788845823	0.192979770114368	0.49017447507643	0.381699113891766	0.321053977313754	0.029180722397068	0.300005365736738	0.0489501991232926	0.0642813325493702	0.247689796924524	0.325106706271647	0.397815846386542	0.160890245791104	0.191633343768277
HORVU1Hr1G041530	1.45562200946748	1.15780955379522	1.00625165845349	1.30202594942177	1.96575043654259	0.813336742528177	1.83838551101529	1.67502995869679	1.76220716843853	2.09985686327943	4.06624083284426	2.68213032674109	6.1661456189914	4.96748633880034	9.05099023644017
HORVU1Hr1G041630	5.36386740475004	5.31921200801573	6.46482229883133	6.72458107995477	7.48130263227861	7.34143428124118	5.10662641948691	5.90010552615585	5.82507369567182	4.62825594355465	5.36661226669801	5.42928199473651	5.15352346455293	5.43004579544976	4.49601306533266
HORVU1Hr1G041650	2.91124401893497	2.93647350600238	4.09392798028338	6.09654503376309	5.3819575058739	5.32949602340832	2.62626501573612	3.80006796599869	7.91361552493231	4.84252705205255	5.40789389951877	10.2408612475569	4.23131400247504	4.6859284086659	5.20358233463091
HORVU1Hr1G041710	16.0517221591962	13.3735393387651	12.9709974055443	15.5936754883689	13.6075734102415	14.854097350383	10.2716142837679	9.55017080928617	16.9041354305771	14.591862488707	13.6435796472592	13.8820563577993	10.0358088520241	13.5550032079005	11.2474031765535
HORVU1Hr1G041720	29.1523202444036	29.2304962711779	17.8230601969913	17.6462811027515	15.0389450873356	13.7411102290287	6.06959025859015	8.35014934633922	25.9762390014273	30.7264769585989	31.4978858422353	28.9995181994309	20.2343605502973	23.4095307626056	21.7135319515902
HORVU1Hr1G041740	21.6548698942697	25.5221497293121	26.3968756977868	23.4211491372456	21.1652158652984	20.9541229193443	28.8013730059062	31.3755611666339	17.1815198922757	16.3917398000894	19.6294164062685	24.5780669941365	26.6536617078983	23.7514225349117	29.4820528874273
HORVU1Hr1G041770	7.71679065293036	7.31601399209735	7.80189642033802	8.39423788568386	12.5769858027337	9.99548049370154	8.05387938159078	11.7252097108775	8.14204978750768	10.2207318753499	9.28836738466964	10.2571165828705	12.6216118535366	9.65341474746624	11.8812673136332
HORVU1Hr1G041790	30.9668627493562	29.2137164225722	37.0659001312526	38.0191577231156	44.7923910151987	34.7380403453482	50.2783846901482	66.6511920878454	31.7034122988525	32.9548964869771	38.32999607407	38.7689747228939	53.0903329541312	42.2336895201648	56.7824338611849
HORVU1Hr1G041810	0.358920495485133	0.55373500398902	0.634076387518638	0.275723142230492	0.152679645556706	0.406668371264088	0.408530113558952	0.450008048605108	0.212117529534268	0.192843997648111	0.227048980514147	0.325106706271647	0.524393615691351	0.341891772306096	0.530676951973691
HORVU1Hr1G041820	1.51544209204834	1.52696622312124	1.25436850574339	2.26705694722849	2.17568494918306	2.16176344724594	2.1010120125889	5.82510418472167	1.56640637194536	2.1641381958288	1.63062449641978	2.09693825545213	3.7250029252558	2.09157319528435	3.81792584892183
HORVU1Hr1G041830	1.13658156903625	1.09069015937231	0.909761773396307	1.04162075953741	1.20235220875906	1.22000511379227	2.01346984539769	0.800014308631302	1.51745617282207	1.67131464628362	1.50677959795752	1.15412880726435	1.01262215443847	1.10612043981384	1.06135390394738
HORVU1Hr1G041860	0.299100412904277	0.0167798486057279	0.124058423644951	0.122543618769107	0.706143360699767	0.620704356139924	0.671156615132565	0.9750174386444	0.342651393863048	0.342833773596641	0.144485714872639	0.308851370958065	0.560558692635582	0.965341474746624	0.85497953373539
HORVU1Hr1G041890	8.85337222196661	7.34957368930881	5.95480433495764	4.15116508580351	4.21777520850401	4.79440606121873	5.10662641948691	2.50004471447282	8.22363345271316	4.79967283035297	5.24276736823575	2.04817224951138	5.44284408010678	5.59093604124086	5.21832336107463
HORVU1Hr1G041910	3.07076423915058	3.69156669326013	6.54752791459463	8.39423788568386	8.64548492964849	5.73616439467241	6.24467459297256	5.90010552615585	7.53833066498707	5.50676748839605	6.2748081887546	9.37932847593703	7.12452015801352	6.75739032322637	8.84461586622818
HORVU1Hr1G041950	0.179460247742566	0.318817123508829	0.192979770114368	0.505492427422568	0.419869025280942	0.428071969751672	0.525253003147225	0.350006260026195	0.73425298684939	0.535677771244751	0.598583675900932	0.5526814006618	0.361650769442311	0.321780491582208	0.427489766867695
HORVU1Hr1G041960	0.0398800550539036	0	0.0137842692938834	0.0459538570384153	0.0954247784729415	0	0	0.0250004471447282	0	0	0.020640816410377	0	0.759466615828853	0.30166921085832	0.471712846198836
HORVU1Hr1G041970	30.6079422538711	24.6328177532085	24.5084308045247	22.8084310434001	20.9361963969634	21.1467553057326	27.6341441100234	20.7003702358349	19.2700617215362	23.269842382872	19.8564653867826	20.3029138066644	18.5165193954463	20.6140627419852	20.6521780476428
HORVU1Hr1G041990	23.0107917661024	16.3267926933732	17.616296157583	18.1670914825202	34.5055998958156	36.8998037925941	38.7811800657034	30.3755432808448	22.2233904019749	20.3771824181503	13.7467837293111	13.426906969019	16.7805957021232	16.2700261056254	12.8099519795871
HORVU1Hr1G042020	8.43463164390062	8.54094294031548	8.33948292279948	8.25637631456861	5.07659821476049	6.07862197047374	4.81481919551623	4.42507914461689	5.66190636526085	6.57812303088555	6.66698370055176	7.86758229177387	6.4012186191289	5.91271653282307	5.33625157262433
HORVU1Hr1G042030	186.100276909041	118.49929085365	99.1364647616097	84.4478712842611	92.619289985837	117.227508916495	43.5084570940284	86.3015435436017	84.7817448815428	75.8948266299564	78.6621513399466	51.9357963268957	72.456731657767	54.5216820424604	37.3537610083703
HORVU1Hr1G042050	45.7224831193005	53.8129744785693	55.936564794579	58.3613984387874	45.1740901290905	43.4279013313071	28.8597344507003	42.7757650646299	35.6846951608803	30.512205850101	39.9606205704898	50.5866034958683	67.6648589626564	45.3911605938152	50.6059437812689
HORVU1Hr1G042060	23.5491725093301	31.8649325022772	45.9154010179257	40.4087582891132	32.539849459273	40.0247291717813	40.298577630351	55.0259841655468	20.6406672969884	16.3703126892396	26.7092164350278	32.8682880040635	39.908162407959	29.6038052255631	40.8768663284179
HORVU1Hr1G042140	11.4455758004703	11.9472522072782	14.8180894909247	17.6462811027515	17.1573751694349	15.8600664792994	7.64534926803182	13.8502477181794	12.7760019711794	11.5706398588866	12.5083347446884	15.1174618416316	14.4479482392203	12.388548925915	16.5836547491778
HORVU1Hr1G042210	0.299100412904277	0.151018637451551	0.151626962232718	0.214451332845938	0.381699113891766	0.278246780338587	0.175084334382408	0.125002235723641	0.277384461698658	0.299979551897061	0.247689796924524	0.211319359076571	0.48822853874712	0.221224087962768	0.398007713980268
HORVU1Hr1G042220	57.4870993602021	46.0439045741173	41.035769687891	34.9096133968495	25.49750080797	30.585742238757	49.1986979614567	35.4506340512246	36.7615995415928	45.4254750015549	37.834616480221	34.2825021763452	37.4851022526955	36.2003053029984	37.8402148810129
HORVU1Hr1G042250	3.09070426667753	1.89612289244725	2.78442239736445	1.22543618769107	2.78640353140989	3.98106931869055	3.58922885483937	1.55002772297315	4.6502689167128	3.85687995296221	2.78651021540089	2.97472636238557	4.14090131011446	4.12281254839704	1.85736933190792
HORVU1Hr1G042270	67.1978927658276	59.1154066379793	59.8512972740419	50.5645606946029	50.9759166602453	62.4342967882814	78.0292516897599	51.5759224595743	67.6981253875137	75.5091386346602	66.690477821928	56.8449075915975	65.3683765766977	79.2384460521187	77.935806807914
HORVU1Hr1G042280	8.2352313686311	5.08429412753554	5.22423806238182	6.46417589007041	7.51947254366779	7.51266306914184	5.63187942263413	5.8501046318664	9.20263743517902	8.91367811351267	7.84351023594325	10.1270739003618	6.23847577287986	7.66239795580133	6.76613113766456
HORVU1Hr1G042290	0.239280330323422	0.335596972114557	0.330822463053202	0.765897617306921	0.858823006256473	0.83474034101576	0.233445779176544	0.400007154315651	0.538452190356219	0.299979551897061	0.412816328207539	0.520170730034636	0.940292000550008	0.462559456649424	0.707569269298254
HORVU1Hr1G042340	0.418740578065988	0.620854398411931	0.303253924465436	0.321676999268907	0.515293803753884	0.77052954555301	0.14590361198534	0.27500491859201	0.505818724274024	0.557104882094542	0.68114694154244	0.357617376898812	0.415898384858657	0.583227140992752	0.368525661092841
HORVU1Hr1G042350	7.73673068045731	7.18177520325153	6.71293914612123	8.86909440841415	9.35162829034826	9.86705890277604	9.60045766863538	7.42513280198427	9.64318922728865	9.04224077861141	7.49261635696684	7.85132695646028	7.32342808120679	8.18529125462242	7.32629014252567
HORVU1Hr1G042370	0.65802090838941	0.78865288446921	1.28193704433116	1.25607209238335	2.74823362002071	2.31158863665903	3.12233729648628	2.90005186878847	5.56400596701426	5.24964215819857	5.61430206362254	6.79473016107743	5.1173583876087	7.24006106059968	8.18126967626106
HORVU1Hr1G042420	11.1065953325122	8.59128248613267	9.09761773396307	7.84279160122287	8.24470086006214	8.47582500108311	8.63749382953214	6.97512475337917	8.6641852448228	9.12794922201057	9.16452248620738	7.50996491487505	7.5585010813443	6.97861441118914	8.46134917869162
HORVU1Hr1G042440	0.917241266239784	0.939671521920761	1.14409435139233	1.3173439017679	1.06875751889694	1.36983030320535	0.525253003147225	1.1500205686575	1.38692230849329	1.34990798353677	1.36229388308488	1.39795883696808	1.2838602315202	1.12623172053773	1.2972103270468
HORVU1Hr1G042450	1.655022284737	1.57730576893842	1.92979770114368	1.43988752053701	0.935162829034826	1.07017992437918	1.34231323026513	0.850015202920759	1.74589043539744	2.05700264157985	1.67190612924054	1.7555762138669	1.53701577012982	1.81001526514992	1.54780777658993
HORVU1Hr1G042490	16.9290833703821	17.3503634583226	18.7879590475631	17.6462811027515	20.3636477261257	20.1621897753038	23.0235899712867	24.2254332832416	16.2025159098099	17.1845429015316	17.4002082339478	14.6460571175377	24.0497761679137	22.1224087962768	29.7473913634141
HORVU1Hr1G042510	0.338980467958181	0.436276063748925	0.372175270934853	0.29104109457663	0.324444246808001	0.642107954627508	0.437710835956021	0.450008048605108	0.375284859945244	0.14998977594853	0.123844898462262	0.243830029703736	0.361650769442311	0.281557930134432	0.0737051322185681
HORVU1Hr1G042520	4.14752572560598	3.94326442234605	4.63151448274483	4.05925737172668	2.65280884154777	2.8680821973362	2.56790357094199	1.97503532443353	4.73185258191829	4.58540172185507	3.77726940309899	4.25889785215858	2.80279346317791	2.77535673989654	2.19641294011333
HORVU1Hr1G042530	0.21934030279647	0.385936517931741	0.427312348110386	0.474856522730291	0.458038936670119	0.256843181851003	0.14590361198534	0.375006707170923	0.489501991232926	0.364260884446431	0.701787757952817	0.373872712212394	0.397815846386542	0.341891772306096	0.353784634649127
HORVU1Hr1G042550	13.6987989110159	17.5517216415913	18.3055096222772	23.0994721379767	25.0394618712998	27.0755520867933	14.4736383089457	18.9253384885592	22.7944760584133	22.9484357201252	18.2464817067732	20.6605311835632	21.1023223969588	21.7805170239707	20.3131344394374
HORVU1Hr1G042560	7.09864979959485	10.5545247730028	15.8794782265537	15.1035010132925	13.0350247394038	11.9860151530468	7.2076384320758	7.82513995629993	10.7200936080011	7.92803101442232	9.39157146672152	13.5732049868413	11.8802277761799	9.99530651977234	12.1760878425075
HORVU1Hr1G042650	96.3302729827043	114.237209307795	115.746509260739	107.3022561847	115.788426199067	117.634177287759	76.3075890683329	100.826803334689	87.2455715707486	70.1095067005131	59.7758043244517	63.639637752675	85.2772514344969	76.8250923652522	75.5330194975886
HORVU1Hr1G042690	4.28710591829464	4.96683518729545	4.61773021345095	4.05925737172668	3.18718760099624	3.46738295498854	3.18069874128042	3.27505857595939	3.3286135403839	3.36405640341704	3.15804491078768	3.39736508053871	3.50801246359042	3.39880644233707	3.93585406047154
HORVU1Hr1G042710	1.53538211957529	3.20495108369402	5.54127625614114	9.46649454991354	13.9320176570495	11.1726784105186	2.01346984539769	6.12510955045841	10.4427091463024	4.82109994120276	5.0157183877216	6.98979418484042	6.60012654232217	4.64570584721813	4.06852329846496
HORVU1Hr1G042770	0.378860523012085	0.46983576096038	0.248116847289902	0.0765897617306921	0.0381699113891766	0.0214035984875836	0.029180722397068	0.0250004471447282	0.179484063452073	0.0642813325493702	0.020640816410377	0.162553353135824	0.108495230832693	0.040222561447776	0.0147410264437136
HORVU1Hr1G042810	7.47751032260693	6.91329762555988	7.22295710999492	8.56273536149138	9.16077873340238	6.95616950846467	10.0381685045914	6.32511312761623	10.8832609384121	12.9419749532732	9.47413473236303	9.94826521191241	17.3411543947588	11.9058781885417	13.69441356621
HORVU1Hr1G042820	7.47751032260693	6.89651777695415	7.20917284070104	8.56273536149138	8.70273979673226	6.95616950846467	10.0381685045914	6.27511223332678	10.8832609384121	12.9419749532732	9.43285309954228	9.94826521191241	12.983262622979	11.6846541005789	13.4732981695543
HORVU1Hr1G042870	0.937181293766736	1.96324228687016	2.77063812807057	2.38960056599759	3.01542299974495	1.26281231076743	0.846240949514973	0.775013861486574	3.11649601084963	2.07842975242964	2.6007428677075	3.98255715182768	4.068571156226	2.95635826641154	4.84979769998178
HORVU1Hr1G042910	0.378860523012085	0.385936517931741	0.372175270934853	0.628036046191675	0.706143360699767	0.599300757652341	1.42985539745633	0.82501475577603	0.962687249424755	0.878511544841392	0.660506125132063	0.829022100992701	0.669053923468275	0.683783544612192	0.501194899086263
HORVU1Hr1G042920	32.8412253368897	38.7614502792314	49.0030773397556	44.3454720420707	28.3602441621582	31.0138142085086	34.6375174853198	26.0504659248068	24.5729999598929	27.4909832202806	29.4750858340183	31.876712549935	21.9702842436204	25.8228844494722	21.3892293698285
HORVU1Hr1G043040	2.25322311054556	1.56052592033269	1.7506022003232	2.86445708872788	3.33986724655295	3.9168585232278	3.53086741004523	3.12505589309102	2.48014342224683	2.12128397412922	1.42421633231601	1.83685289043481	1.44660307776924	2.09157319528435	1.63625393525221
HORVU1Hr1G043050	0.43868060559294	0.151018637451551	0.303253924465436	0.382948808653461	0.496208848059296	0.342457575801338	0.437710835956021	0.450008048605108	0.571085656438414	0.449969327845591	0.412816328207539	0.520170730034636	0.289320615553849	0.583227140992752	0.250597449543132
HORVU1Hr1G043110	26.6996968585885	23.5589074424419	23.8605701477122	25.5809804180512	20.6690070172391	25.4488786017369	16.1953009303728	17.9003201556254	19.7921971788513	20.4843179723993	18.4941715036978	22.2372987089807	15.3701577012982	17.7381495984692	14.6525802850513
HORVU1Hr1G043150	5.00494690926491	5.08429412753554	5.74804029554939	8.3329660762993	8.35921059422967	7.14880189485292	4.58137341633968	6.37511402190569	7.60359759715146	6.98523813703156	6.48121635285837	8.87541308121597	7.07027254259718	7.42106258711467	7.62111067139995
HORVU1Hr1G043190	0.618140853335507	0.70475364144057	0.592723579636988	0.765897617306921	0.687058405005178	1.07017992437918	0.612795170338429	0.575010284328749	0.228434262575366	0.299979551897061	0.309612246155655	0.455149388780306	0.596723769579813	0.341891772306096	0.221115396655704
HORVU1Hr1G043200	0.498500688173796	0.604074549806203	0.565155041049221	0.903759188422167	0.725228316394355	0.920354734966095	0.29180722397068	0.725012967197118	0.701619520767194	1.0713555424895	0.846273472825456	0.910298777560613	0.578641231107697	0.80445122895552	0.6486051635234
HORVU1Hr1G043220	6.83942944174448	6.35956262157086	6.47860656812521	6.54076565180111	5.34378759448472	7.36283787972876	6.88665048570806	6.87512296480025	4.51973505238402	4.3068492808078	4.87123267284897	4.29140852278575	4.14090131011446	3.59991924957595	3.59681045226613
HORVU1Hr1G043250	10.8473749746618	8.15500642238374	8.20164022986064	7.8121556965306	6.66064953741131	7.89792784191835	9.97980705979727	5.77510329043221	10.6221932097545	11.0992434201913	11.331808209297	10.4034146006927	7.70316138912122	10.6187562222129	10.0533800346127
HORVU1Hr1G043280	12.6818575071414	21.9816016735035	32.3378957634505	40.6844814313436	56.6250635458435	37.0710325804948	12.7227949651217	30.3505428337	30.1696393929894	23.0341441635243	31.374040943773	44.1820013823169	59.3468912654832	41.1677916417987	73.660909139237
HORVU1Hr1G043380	34.2569672913032	19.0115684702897	10.0900851231227	19.8827021452877	14.3900565937196	20.7400869344685	5.36925292106052	4.80008585178781	31.4912947693183	37.5402982088322	14.2215225067497	8.59907238088507	5.09927584913658	6.97861441118914	2.18167191366962
HORVU1Hr1G043440	75.1739037766084	77.9423967736059	83.8910629225746	79.3776290576893	85.3288369105043	97.4505839139681	103.912552455959	112.302008574119	68.3018445100343	70.9665911345047	67.0000900680837	66.7281514622556	94.2823555936104	71.2743788854591	54.409128603747
HORVU1Hr1G043480	0.43868060559294	0.822212581680665	0.716782003281939	0.719943760268506	0.267189379724236	0.492282765214423	0.320987946367748	0.175003130013097	0.228434262575366	0.792803101442232	0.619224492311309	0.585192071288965	0.415898384858657	0.422336895201648	0.398007713980268
HORVU1Hr1G043500	0.43868060559294	1.12424985658377	0.454880886698153	0.474856522730291	0.0763398227783532	0.0642107954627508	0.029180722397068	0.100001788578913	0.195800796493171	0.12856266509874	0.185767347693393	0.195064023762988	0.144660307776924	0.080445122895552	0.0884461586622818
HORVU1Hr1G043520	33.6188864104408	34.5832679764051	39.3540888340372	42.3694561894189	26.2418140800589	34.1601431861834	16.6913732111229	18.7003344642567	44.5773146682785	47.6110403082335	36.6787307612399	50.4565608133597	32.2954137111984	36.3410842680656	27.5804604761882
HORVU1Hr1G043580	0.777661073551121	0.855772278892121	0.468665155992037	0.321676999268907	0.286274335418824	0.577897159164757	0.437710835956021	0.350006260026195	0.407918326027439	0.471396438695381	0.784351023594325	0.568936735975383	0.235073000137502	0.462559456649424	0.383266687536554
HORVU1Hr1G043640	9.8503735983142	10.789442653483	12.2542154022624	12.6526286379103	13.951102612744	15.0253261382837	14.6779033657252	12.6502262552325	11.6990975904669	13.5205069462175	12.0542367836602	15.0199298297501	11.6270722375703	12.2276586801239	11.7633391020835
HORVU1Hr1G043660	25.0845546289054	35.824976773229	33.5233429227245	32.09111016516	32.4635096364947	32.1482049283506	25.3872284854492	34.5006170597249	29.7617210669619	28.476630319371	24.9547470401458	30.3649663657719	32.8017247884176	28.3971283821299	29.1577503056656
HORVU1Hr1G043670	0.179460247742566	0.352376820720285	0.551370771755337	0.520810379768706	0.78248318347812	0.83474034101576	0.379349391161884	0.675012072907661	0.489501991232926	0.407115106146011	0.495379593849047	0.471404724093889	0.397815846386542	0.563115860268864	0.265338475986845
HORVU1Hr1G043680	22.4923510504017	25.1194333627746	23.3643364531324	26.6991909393193	23.7035149726787	25.2990534123238	17.7418792174174	21.3253814144532	21.750205143783	18.8987117695148	19.6087755898581	21.8796813320819	21.6809636280665	19.2263843720369	19.2665215619337
HORVU1Hr1G043710	14.5562200946748	15.3367816256353	12.4471951723767	14.2916495389471	10.8784247459153	11.9218043575841	9.01684322069402	9.52517036214144	16.2514661089332	17.6987935619266	13.9738327098252	19.9615517650791	10.7048627754924	11.6243202584073	8.49083123157905
HORVU1Hr1G043730	19.8203873617901	20.471415298988	24.1638240721777	27.0515038432805	24.2951485992109	26.4762513291409	21.3894695170509	31.000554459463	20.3632828352897	17.8059291161755	21.2394000862779	24.3992583056871	18.932417780305	19.3470520563803	17.7334548117875
HORVU1Hr1G043790	0.0199400275269518	0.0335596972114557	0.0689213464694172	0.107225666422969	0.55346371514306	0.192632386388252	0.0583614447941361	0.225004024302554	0.0652669321643902	0.192843997648111	0.20640816410377	0.0650213412543295	0.759466615828853	0.321780491582208	0.501194899086263
HORVU1Hr1G043800	0.259220357850374	0.385936517931741	0.427312348110386	0.29104109457663	0.572548670837649	0.342457575801338	0.525253003147225	0.375006707170923	0.473185258191829	0.642813325493702	0.639865308721686	0.520170730034636	0.361650769442311	0.623449702440528	0.48645387264255
HORVU1Hr1G043820	101.813780552616	85.5436681920007	102.100082659795	194.231635749035	378.206566999656	316.430800040436	123.376094294804	163.427922985088	207.418310418432	191.065547447578	137.942576070549	74.5144570774616	169.361055329834	156.948434769222	69.1501550474606
HORVU1Hr1G043830	30.7874025016136	22.93805304403	17.0511411165338	18.7338557193273	12.653325625512	14.3832181836562	5.98204809139895	4.17507467316961	10.9648446036175	7.90660390357253	4.85059185643859	2.63336432080034	5.29818377232985	3.57980796885206	0.751792348629395
HORVU1Hr1G043870	25.6029953446061	26.2772429165698	29.2640037109145	31.0494894056226	23.0737114347572	22.152724434649	19.9012526748004	21.8753912516372	23.0392270540297	19.6915148709571	21.3838858011505	19.8965304238248	25.6048744765156	31.8964912280864	45.0190947591014
HORVU1Hr1G043880	0.179460247742566	0.218138031874462	0.261901116583785	0.306359046922768	3.64522653766636	2.3543958336342	5.80696375701654	1.45002593439424	7.9951991901378	9.77076254750427	13.0656367877686	6.71345348450952	5.96723769579813	11.141649521034	9.46373897686415
HORVU1Hr1G043900	276.428601606133	285.593023269488	356.530125286295	404.286716271631	372.93911922795	387.79039739804	971.07607992963	925.991561793588	233.818784478928	218.38511378106	430.588071136874	450.516618215935	333.550504656643	297.264840379789	250.494262358026
HORVU1Hr1G043910	228.931456036934	175.869593236634	42.4004123479854	22.2110309019007	3.30169733516377	8.32599981167002	11.8181925708126	5.80010373757694	92.7769440716806	72.4879160048398	66.1744574116686	64.6799792127442	61.2998054204717	65.7839992478377	42.8521638718755
HORVU1Hr1G043920	30.9668627493562	25.0690938169574	12.52990078814	2.12919537611324	0.419869025280942	0.53508996218959	0.350168668764816	1.25002235723641	7.9788824570967	9.7064812149549	6.0064775754197	5.91694205414398	8.04672962009142	6.45572111236805	4.59920025043865
HORVU1Hr1G043930	20.8772088207186	14.1286325260229	11.5374333989804	11.3506026884886	10.4013008535506	13.9765498123921	14.2693732521663	11.4752052394302	13.9671234831795	16.1131873590421	12.2606449477639	10.0783078944211	10.5421199292434	13.112555031975	10.3629415899307
HORVU1Hr1G043940	111.584394040822	119.808119044897	135.044486272176	112.801401076963	113.5554863828	115.386799446563	114.038263127742	134.652408321506	92.5811432751875	82.1729701089449	96.8467105974888	85.4055317375618	149.976574087726	121.914583748209	181.624186812996
HORVU1Hr1G044000	26.8193370237502	25.2704520002262	5.72047175696163	8.48614559976069	5.28653272740096	7.041783902415	2.68462646053026	3.37506036453831	9.77372309161743	7.756614127624	5.57302043080178	3.57617376898812	8.93277400522508	6.75739032322637	2.65338475986845
HORVU1Hr1G044020	18.3647653523226	28.0726867173827	28.4920846304571	32.9489154965437	28.5510937191041	24.1432590939943	11.1178552332829	13.8752481653241	27.3142111107973	18.8987117695148	20.9091470237119	32.9007986746907	30.4148297100983	22.806192340889	27.8015758728439
HORVU1Hr1G044080	1.15652159656321	1.07391031076658	0.854624696220773	0.965030997806721	1.297776987232	1.96913106085769	1.22559034067686	7.42513280198427	1.24007171112341	2.12128397412922	1.8783142933443	2.61710898548676	3.94199338692119	8.08473485100298	6.13226700058487
HORVU1Hr1G044120	3.01094415656973	2.93647350600238	4.4109661740427	5.68296032041735	4.21777520850401	3.42457575801338	3.61840957723644	3.40006081168303	3.44283067167158	3.878307063812	4.14880409848577	5.6243460184995	3.92391084844907	4.48481560142702	3.67051558448469
HORVU1Hr1G044160	8.97301238712832	7.53415202397181	8.8219323480854	8.1338326957995	6.10718582226825	6.16423636442408	6.4781203721491	5.35009568897183	8.07678285534329	8.07802079037085	6.62570206773101	7.46119890893431	5.62366946482793	5.5306021990692	5.48366183706147
HORVU1Hr1G044170	4.72578652388758	3.57410775302004	3.65283136287911	2.26705694722849	1.37411681001036	1.49825189413085	1.54657828704461	1.45002593439424	4.30761752284975	4.67111016525423	3.59150205540559	2.763407003309	2.36881253984714	2.09157319528435	1.69521804102707
HORVU1Hr1G044200	1.81454250495262	1.56052592033269	3.06010778324212	1.02630280719127	2.15659999348848	1.71228787900669	3.00561440689801	5.70010194899803	0.179484063452073	0.642813325493702	0.330253062566032	0.325106706271647	1.66359353943463	0.382114333753872	0.678087216410827
HORVU1Hr1G044310	0.159520220215615	0.167798486057279	0.275685385877669	0.183815428153661	0.286274335418824	0.171228787900669	0.029180722397068	0.0500008942894564	0.0163167330410975	0.0214271108497901	0.20640816410377	0.0162553353135824	0.0180825384721155	0.040222561447776	0
HORVU1Hr1G044350	12.1035967088598	14.2964310120801	16.8168085385378	18.917671147481	13.722083144409	15.6888376913988	8.90012033110575	10.3501851179175	16.6430677019195	16.3060313566902	15.0265143467544	20.1403604535286	16.9433385483723	17.778372159917	15.492818792343
HORVU1Hr1G044380	0.0199400275269518	0.167798486057279	0.0551370771755337	0.229769285192076	0.209934512640471	0.256843181851003	0	0.100001788578913	0.146850597369878	0.0857084433991602	0.123844898462262	0.243830029703736	0.16274284624904	0.160890245791104	0.16215129088085
HORVU1Hr1G044440	5.06476699184576	7.28245429488589	10.6138873562902	13.3113005887943	16.317637118873	12.1358403424599	4.14366258038366	7.05012609481335	11.1606454001107	6.02101814879101	8.11184084927815	11.7200967610929	10.5602024677155	7.30039490277134	8.56453636379762
HORVU1Hr1G044500	4.94512682668405	4.96683518729545	6.06507848930871	5.74423212980191	6.71790440449508	5.92879678106066	6.59484326173738	7.10012698910281	6.55932668252121	5.97816392709143	6.02711839183008	8.06264631553685	5.64175200330005	6.83783544612192	6.25019521213458
HORVU1Hr1G044530	14.0377793789741	11.7962335698267	11.7855502462703	13.3572544458327	14.1037822583007	15.9884880702249	16.4579274319464	12.600225360943	16.6593844349606	13.7347780547154	12.5083347446884	11.7851181023472	9.04126923605777	12.2477699608478	8.88883894555932
HORVU1Hr1G044560	0.159520220215615	0.117458940240095	0.0413528078816503	0.168497475807523	0.515293803753884	0.0856143939503344	0.233445779176544	0.200003577157826	0.538452190356219	1.15706398588866	1.19716735180186	1.25166081914584	1.37427292388078	0.844673790403296	0.825497480847963
HORVU1Hr1G044570	12.7217375621953	13.7426960080911	13.0399187520137	10.8910641181044	8.87450439798356	9.18214375117337	8.54995166234093	8.15014576918139	8.07678285534329	6.70668569598429	7.78158778671212	7.77005027989237	8.78811369744815	6.55627751598749	6.94302345498912
HORVU1Hr1G044590	17.9260847467297	20.7063331794682	22.937024105022	27.7101757941644	28.8182830988283	27.6320456474704	13.5982166370337	20.7253706829797	22.4844581306324	17.0345531255831	16.8841878236884	20.5142331657409	22.1872747052858	19.1660505298653	19.4728959321457
HORVU1Hr1G044630	0.717840990970266	1.15780955379522	0.771919080457472	1.08757461657583	1.4695415884833	1.36983030320535	2.85971079491267	2.32504158445972	1.48482270673988	1.15706398588866	1.94023674257544	1.52800151947674	1.08495230832693	1.42790093139605	1.07609493039109
HORVU1Hr1G044680	108.433869691564	82.2380380166723	92.2029773067863	116.707478925229	149.03441901904	170.072993582339	353.174283171714	230.404120885815	128.967457956835	141.226087610966	207.275078393006	148.216147389244	170.735328253715	161.614251897164	200.787521189823
HORVU1Hr1G044710	16.151422296831	16.461031482219	16.678965845599	14.6286444905622	10.2867911193831	13.3772490547398	9.07520466548816	10.6751909307989	12.6128346407684	11.3563687503887	9.04067758774512	10.6147339597693	10.8676056217414	9.93497267760067	8.68246457534733
HORVU1Hr1G044740	60.4980435167718	40.758252263313	35.9218057798602	50.9168735985641	61.3772175137959	71.4880189485292	63.4388904912259	74.4513315970006	53.0456991166081	60.6815779266054	50.9002532679896	47.0104297268802	62.1135196517169	58.8053848366485	62.9441829146572
HORVU1Hr1G044750	21.7146899768505	21.3104077292744	23.5711004925407	24.5546776108599	27.024297263537	29.8580198901791	17.1290840470789	18.8753375942698	25.6825378066875	23.4626863805201	21.2806817190987	22.1722773677263	19.4929764729406	20.3325048118508	18.0430163671055
HORVU1Hr1G044770	0.418740578065988	0.201358183268734	0.454880886698153	0.306359046922768	0.190849556945883	0.385264772776505	0.379349391161884	0.925016544354943	0.0652669321643902	0.0642813325493702	0.20640816410377	0.178808688449406	0.433980923330773	0.120667684343328	0.250597449543132
HORVU1Hr1G044780	2.29310316559946	2.93647350600238	1.72303366173543	1.7156106627675	1.03058760750777	1.3056195077426	0.29180722397068	0.625011178618205	1.25638844416451	1.7141688679832	1.36229388308488	1.12161813663718	0.578641231107697	1.10612043981384	0.280079502430559
HORVU1Hr1G044790	0.179460247742566	0.268477577691646	0.330822463053202	0.260405189884353	0.305359291113413	0.192632386388252	0.729518059926701	0.27500491859201	0.407918326027439	0.428542216995801	0.763710207183948	0.829022100992701	0.705219000412506	0.382114333753872	0.840238507291677
HORVU1Hr1G044810	42.2728583571379	51.6148143112189	63.2835803282188	81.0319679110723	74.8511962341753	82.5322757681224	34.0247223149813	65.126164812017	65.1363983000614	57.2960944123386	56.2668655346876	67.8660249342064	62.3485926518544	55.4468009557592	51.6525566587726
HORVU1Hr1G044820	11.7845562684285	13.6755766136682	19.3255455500246	26.77578070105	33.6849468009483	27.2895880716691	10.7968672869152	14.6752624739555	26.0741393996739	18.470169552519	15.1297184288063	20.9043612132669	18.317611472253	14.2991205946844	11.0705108592289
HORVU1Hr1G044880	0.159520220215615	0.23491788048019	0.289469655171552	0.153179523461384	0.171764601251295	0.192632386388252	0.14590361198534	0.0750013414341846	0.244750995616463	0.342833773596641	0.0619224492311309	0.292596035644483	0.16274284624904	0.160890245791104	0.206374370211991
HORVU1Hr1G044930	2.7716638262463	3.0707122948482	3.55634147782193	2.00665175734413	4.37045485406072	3.7884369323023	5.60269870023706	2.60004650305173	5.27030477227451	5.1639337147994	4.85059185643859	3.70621645149678	4.28556161789138	5.22893298821088	4.30437972156438
HORVU1Hr1G044960	17.8862046916758	20.1190384782677	9.75926266006947	8.57805331383752	7.76757696769743	8.86108977385961	13.5106744698425	20.0003577157826	3.21439640909622	4.0925781723099	6.46057553644799	5.72187803038099	9.05935177452989	8.46684918475685	9.33106973887073
HORVU1Hr1G045010	0.0598200825808555	0.167798486057279	0.261901116583785	0.382948808653461	0.419869025280942	0.385264772776505	0.29180722397068	0.250004471447282	0.358968126904146	0.235698219347691	0.103204082051885	0.406383382839559	0.198907923193271	0.40222561447776	0.383266687536554
HORVU1Hr1G045020	0.159520220215615	0.302037274903102	0.551370771755337	1.05693871188355	0.954247784729415	1.39123390169293	1.05050600629445	0.9750174386444	2.6596274856989	1.77845020053258	2.22920817232071	3.60868443961529	1.57318084707405	2.71502289772488	2.2701180723319
HORVU1Hr1G045070	15.732681718765	15.0850838965494	16.1413793431375	16.3595731056758	14.0083574798278	16.9302464036786	16.3412045423581	17.0753053998494	11.4217131287683	10.006460766852	10.7951469826272	12.3540548383226	11.1026786218789	12.9918873476316	11.5422237054278
HORVU1Hr1G045080	6.79954938669057	3.27207047811693	4.05257517240173	6.38758612833972	14.4473114608033	19.0277990554618	45.8429148857939	26.4754735262672	7.68518126235694	8.07802079037085	9.61862044723567	8.40400835712208	17.3592369332309	13.6756708922438	15.8466034269922
HORVU1Hr1G045090	6.79954938669057	3.27207047811693	4.05257517240173	6.38758612833972	14.4473114608033	19.0277990554618	45.8429148857939	26.4754735262672	7.68518126235694	8.07802079037085	9.61862044723567	8.40400835712208	17.3592369332309	13.6756708922438	15.8466034269922
HORVU1Hr1G045100	6.02188831313945	5.5373500398902	4.64529875203872	5.80550393918646	6.81332918296802	6.97757310695225	4.40628908195727	4.67508361606417	4.47078485326073	4.43541194590654	4.60290205951407	3.46238642179304	9.29442477466739	8.80874095706294	11.733857049196
HORVU1Hr1G045110	6.02188831313945	5.5373500398902	4.64529875203872	5.80550393918646	6.81332918296802	6.97757310695225	4.40628908195727	4.67508361606417	4.47078485326073	4.43541194590654	4.60290205951407	3.46238642179304	9.29442477466739	8.80874095706294	11.733857049196
HORVU1Hr1G045130	21.2361293162037	24.7838363906601	33.5233429227245	56.8602391088658	77.5230900314176	66.1585229251209	21.7979996306098	33.6256014096594	55.6563764031837	40.3043955084551	32.1790327837777	39.4516988060644	36.7437181753388	28.5379073471971	26.6812578631217
HORVU1Hr1G045160	74.5956429783268	72.8245429488589	80.527701214867	82.6709888121091	70.0227024434444	74.7199623201544	71.1426012040519	84.5515122434708	71.8262588469114	71.0308724670541	67.1445757829563	71.3121560206858	74.4638934281718	76.3625329086027	85.7485508230822
HORVU1Hr1G045170	4.8853067441032	5.40311125104437	5.0726111001491	5.23873970237934	2.88182830988283	4.1737017050788	3.41414452045696	3.05005455165684	3.36124700646609	3.59975462276473	3.46765715694333	4.16136584027709	2.96553630942695	2.93624698568765	2.55019757476246
HORVU1Hr1G045190	8.57421183658928	7.66839081281764	10.4622603940575	11.8560951159111	11.5082282838367	11.2368892059814	6.65320470653151	8.17514621632612	5.17240437402792	3.06407685151998	3.52957960617446	4.32391919341291	7.68507885064911	5.55071347979309	5.88166955104174
HORVU1Hr1G045220	13.1005980852073	31.2440781038653	15.4521658784433	10.3089819289512	9.54247784729415	3.59580454591404	8.11224082638491	15.17527141685	6.91829480942536	7.39235324317757	11.6207796390422	18.1734648805851	27.1238077081733	23.8117563770834	43.6776613527235
HORVU1Hr1G045230	0	0.0503395458171836	0.0137842692938834	0	0.171764601251295	0.0428071969751672	0.0875421671912041	0.0250004471447282	0.0489501991232926	0.0214271108497901	0.227048980514147	0.0975320118814942	2.65813315540098	0.724006106059968	1.35617443282165
HORVU1Hr1G045280	42.5520187425152	43.1913303111435	48.7825290310535	39.0914143873453	32.9788034402486	40.966487505235	68.4579747435216	54.5009747755075	31.784995964058	34.7119195766599	38.0823062771455	41.0934876727362	37.9371657144984	38.8549943585516	40.3167073235568
HORVU1Hr1G045310	4.52638624861806	3.89292487652887	4.5763774055693	5.59105260634052	5.83999644254402	5.92879678106066	4.58137341633968	5.42509703040602	4.38920118805524	3.83545284211242	4.49969797746218	5.57558001255875	5.78641231107697	5.71160372558419	6.10278494769744
HORVU1Hr1G045360	23.6488726469649	16.9812067889966	17.4371006567625	15.1341369179848	14.370971638025	15.2607657216471	19.2300960596678	12.875230279535	16.4309501723852	18.3416068874203	15.3361265929101	14.4347377584611	11.3919992374328	14.5605672440949	11.1294749650038
HORVU1Hr1G045390	0.777661073551121	1.49340652590978	2.64657970442562	3.01763661218927	1.67947610112377	1.00596912891643	1.19640961827979	1.22502191009168	1.37060557545219	0.621386214643912	0.722428574363194	1.85310822574839	1.51893323165771	1.06589787836606	1.73944112035821
HORVU1Hr1G045490	2.83148390882716	1.52696622312124	2.34332577996018	1.7922004244982	3.14901768960707	3.40317215952579	6.27385531536963	2.35004203160445	4.06286652723329	4.58540172185507	2.82779184822165	3.39736508053871	2.60388553998464	3.3585838808893	2.77131297141816
HORVU1Hr1G045520	49.9497689550143	56.9172464706289	59.1069467321722	48.8949038888738	50.6896423248265	55.1356697040154	126.527612313687	92.8516606955205	39.8454620863602	36.74749510739	49.1457838731076	41.9387651090425	58.1353611878515	57.7595982390063	59.5390058061593
HORVU1Hr1G045530	49.9497689550143	56.9172464706289	59.1069467321722	48.8949038888738	50.6896423248265	55.1356697040154	126.527612313687	92.8516606955205	39.8454620863602	36.74749510739	49.1457838731076	41.9387651090425	58.1353611878515	57.7595982390063	59.5390058061593
HORVU1Hr1G045590	102.212581103155	85.2416309170976	69.4451487025847	73.8938021177718	176.40224548508	202.285409306153	356.763512026554	322.555769061283	101.490079515627	119.113309213983	72.2015758034987	66.3867894206704	173.809359793975	173.761465454392	160.48555489271
HORVU1Hr1G045610	52.3425722582485	47.0842551876724	28.0785565516406	18.8257634334041	17.0619503909619	18.7923594720984	12.7811564099158	12.7502280438114	23.7897967739202	24.1054997060138	15.9140694524006	16.0440159545058	14.9180942394953	16.3906937899687	11.7485980756398
HORVU1Hr1G045630	153.119471379463	149.72658910891	127.435569621952	104.560342714741	111.150781965282	108.708876718437	92.0651791627496	84.1265046420104	93.2011791307492	107.306971135749	95.6908248785077	68.4999830114361	72.9087951195699	74.8944094157589	74.5011476465287
HORVU1Hr1G045640	25.682755454714	30.0023693070414	20.345581477772	23.5436927560148	20.7262618843229	20.2478041692541	14.4736383089457	18.6503335699672	18.5847589338101	19.2415455431115	16.863547007278	17.3444427795924	15.4424878551867	15.6465764031849	12.5740955564877
HORVU1Hr1G045670	9.69085337809859	12.6184461515074	15.6727141871455	16.8344296284061	22.3866530297521	20.1621897753038	16.0493973183874	23.7754252346365	20.901735025646	16.7131464628362	21.6522164144854	26.9838566205467	22.2053572437579	23.1078615517473	27.948986137281
HORVU1Hr1G045690	29.9299813179547	18.7934304384152	7.66405372739919	2.57341599415125	1.71764601251295	1.75509507598186	2.65544573813319	2.1250380073019	25.5030537432355	16.9059904604844	11.4143714749385	58.6655051467188	14.0682149313059	10.8600915908995	5.02669001730635
HORVU1Hr1G045700	20.9968489858803	14.6320279841947	5.56884479472891	1.86879018622889	1.22143716445365	1.41263750018052	1.60493973183874	1.65002951155206	17.4425876209333	11.4849314154875	8.19440411491966	42.7027658687809	10.8856881602136	7.17972721842802	3.74422071670326
HORVU1Hr1G045710	0.239280330323422	0.151018637451551	0.206764039408252	0.0459538570384153	0.133594689862118	0.23543958336342	0.554433725544293	0.200003577157826	0.163167330410975	0.449969327845591	0.557302043080178	0.178808688449406	0.126577769304809	0.543004579544976	0.221115396655704
HORVU1Hr1G045720	69.0921953808881	71.4485953631893	67.4188611163839	70.6923500774288	40.6700405851676	44.9689604224131	39.5106981256301	53.6009586782973	51.9361612698135	50.7822527140024	47.1849063141218	59.3157185592621	46.9061047966677	41.6102398177243	39.1816482873908
HORVU1Hr1G045870	0.578260798281603	0.218138031874462	0.0275685385877669	0.1991333804998	0.190849556945883	0.256843181851003	0.437710835956021	0.650011625762933	0.375284859945244	0.214271108497901	0.123844898462262	0.195064023762988	0.687136461940391	0.764228667507744	0.456971819755123
HORVU1Hr1G045880	0.319040440431229	0.536955155383292	0.606507848930871	0.49017447507643	0.648888493616002	0.513686363702006	0.496072280750157	0.575010284328749	0.261067728657561	0.557104882094542	0.433457144617916	0.715234753797624	0.904126923605777	0.482670737373312	0.604382084192259
HORVU1Hr1G045940	0.0997001376347591	0.134238788845823	0.413528078816503	0.0612718093845537	0.11450973416753	0.0214035984875836	0.0875421671912041	0	0.424235059068536	0.342833773596641	0.165126531283016	0.0975320118814942	0.180825384721155	0.140778965067216	0.0294820528874273
HORVU1Hr1G045960	4.70584649636063	10.4370658327627	18.4984893923916	22.8850208051308	15.6496636695624	9.18214375117337	6.53648181694324	10.1001806464702	14.1302908135905	9.10652211116077	11.5382163734007	22.2047880383535	15.1350847011607	12.5896617331539	23.6151243628292
HORVU1Hr1G046010	2.89130399140801	2.97003320321383	2.60522689654397	3.06359046922768	5.89725130962778	3.18913617464996	4.58137341633968	3.40006081168303	7.9625657240556	8.54941722906623	8.3388898297923	8.2089443333591	11.7174849299309	11.1215382403101	10.0828620875001
HORVU1Hr1G046020	16.55022284737	19.6492027173073	21.9307724465685	22.8850208051308	21.4514902007172	18.9635882599991	12.5768913531363	15.8752839369024	16.3330497741386	12.8348393990242	12.3432082134054	16.1415479663873	17.9017130873944	13.4946693657288	14.4756879677268
HORVU1Hr1G046100	3.2302844593662	2.651216079705	2.50873701148679	3.41590337318887	2.67189379724236	2.20457064422111	1.80920478861822	1.67502995869679	3.63863146816475	2.39983641517649	2.27048980514147	2.40578962641019	2.13373953970963	2.03123935311269	2.5944206540936
HORVU1Hr1G046270	14.4365799295131	11.4438567491064	10.4346918554698	12.17777211518	13.7411681001036	11.9218043575841	18.7340237789177	11.1001985322593	18.3236912051525	23.9340828192155	27.4110041929806	19.0024869815778	25.4782967072108	25.4809926771661	35.8354352846678
HORVU1Hr1G046320	0.857421183658928	1.04035061355513	1.29572131362504	1.02630280719127	8.24470086006214	0.963161931941262	5.92368664660481	4.80008585178781	1.58272310498646	3.36405640341704	11.1254000451932	4.53523855248948	54.9709169552313	39.9208922369177	76.8597118775229
HORVU1Hr1G046350	0.458620633119892	0.671193944229115	0.234332577996018	0.245087237538215	0.267189379724236	0.214035984875836	0	0.175003130013097	0.261067728657561	0.12856266509874	0.144485714872639	0.373872712212394	0.289320615553849	0.281557930134432	0.456971819755123
HORVU1Hr1G046370	0.119640165161711	0.117458940240095	0.0275685385877669	0.0919077140768305	0.286274335418824	0.0428071969751672	0.0875421671912041	0.125002235723641	0.0163167330410975	0.0214271108497901	0.0619224492311309	0.0325106706271647	0.16274284624904	0.040222561447776	0.235856423099418
HORVU1Hr1G046400	247.914362242592	198.623067946001	162.475182167004	129.222245992024	271.464409799824	184.541826159946	268.491826775423	223.92900507533	214.206071363529	262.460680799078	256.462143898934	181.084435393308	214.693979279428	179.95573991735	252.602229139477
HORVU1Hr1G046410	204.185881875987	160.348233276335	130.97812683048	103.932306668549	223.160386936821	159.071543959721	218.417707142054	185.303314236725	161.470390174701	214.506806717248	211.91926208534	144.282356243357	176.630235795625	146.731904161487	205.489908625368
HORVU1Hr1G046420	7.6968506254034	5.70514852594748	8.11893461409734	9.17545345533692	9.38979820173744	9.46039053151195	6.01122881379601	5.27509434753765	14.2445079448782	14.3990184910589	11.662061271863	13.4106516337055	8.64345338967123	11.2623172053773	7.6800747771748
HORVU1Hr1G046560	0.857421183658928	1.15780955379522	0.937330311984074	0.536128332114845	0.343529202502589	0.727722348577842	0.729518059926701	0.350006260026195	0.685302787726097	1.11420976418908	0.619224492311309	0.829022100992701	0.470146000275004	0.522893298821088	0.398007713980268
HORVU1Hr1G046600	3.52938487227047	4.27886139446061	5.51370771755337	4.15116508580351	2.71006370863154	3.44597935650096	4.34792763716314	3.77506751885396	2.12117529534268	2.8069515213225	2.49753878565561	2.84468367987691	5.18968854149716	4.00214486405371	6.86931832277055
HORVU1Hr1G046610	7.53733040518779	5.75548807176466	5.33451221673289	7.32198122145417	7.88208670186496	8.47582500108311	9.51291550144418	7.00012520052389	7.70149799539804	9.44935588475742	6.08904084106121	6.06324007196622	6.47354877301736	6.39538727019638	5.20358233463091
HORVU1Hr1G046620	9.49145310282907	7.83618929887491	8.28434584562394	10.1251665007975	11.5082282838367	11.3011000014441	12.1683612395774	9.95017796360182	10.2632250828504	11.6563483022858	8.46273472825456	9.26554112874195	9.27634223619527	9.15063272936904	8.41712609936048
HORVU1Hr1G046630	6.64002916647496	5.28565231080428	11.8682558620336	9.14481755064464	6.6797344931059	6.50669394022542	1.4590361198534	3.67506573027504	10.9974780696997	9.79218965835406	6.13032247388196	11.6875860904657	6.58204400385006	5.59093604124086	5.67529518082975
HORVU1Hr1G046670	9.29205282755955	11.0243605339632	11.0274154351067	11.1208334032965	10.8593397902207	12.1358403424599	8.81257816391455	9.55017080928617	9.10473703693243	8.72083411586456	10.0314367754432	11.4925220667027	11.1569262372953	11.4433187318923	11.0705108592289
HORVU1Hr1G046680	0.378860523012085	0.100679091634367	0.220548308702135	0.857805331383752	0.591633626532237	1.15579431832951	2.27609634697131	7.17512833053699	0.146850597369878	0.14998977594853	0.557302043080178	0.260085365017318	1.22961261610386	2.59435521338155	2.57967962764989
HORVU1Hr1G046690	0.319040440431229	0.0671193944229115	0.0689213464694172	0.229769285192076	0.419869025280942	0.107017992437918	0.262626501573612	0.775013861486574	0.0489501991232926	0.0428542216995801	0.268330613334901	0.113787347195077	1.03070469291059	0.884896351851072	2.12270780789476
HORVU1Hr1G046710	4.30704594582159	3.60766745023149	2.96361789818494	3.61503675368867	2.9390831769666	3.03931098523687	3.73513246682471	3.47506215311722	3.9812828620278	3.53547329021536	3.71534695386786	2.90970502113124	7.19685031190199	5.8724939713753	7.76852093583708
HORVU1Hr1G046730	0.897301238712832	1.54374607172696	1.37842692938834	1.30202594942177	0.820653094867297	0.898951136478511	0.554433725544293	0.700012520052389	1.22375497808232	0.964219988240553	0.928836738466964	1.18663947789151	0.813714231245199	0.824562509679408	0.663346189967113
HORVU1Hr1G046740	0	0.0671193944229115	0.0275685385877669	0.0612718093845537	0.152679645556706	0	0.233445779176544	0.0250004471447282	0.114217131287683	0.17141688679832	0.247689796924524	0.178808688449406	0.343568230970195	0.382114333753872	0.191633343768277
HORVU1Hr1G046870	81.6544127228677	79.41902345091	92.4924469619579	113.123078076232	115.005943015589	95.8239104289118	94.370456232118	97.50174386444	113.792896228614	108.871150227783	100.335008570842	119.005309830737	93.1069905929229	98.7262770735662	106.105908341851
HORVU1Hr1G046940	1.55532214710224	1.45984682869832	0.827056157633006	1.1948002829988	7.38587785380567	1.51965549261844	6.27385531536963	7.67513727343156	1.56640637194536	0.664240436343492	2.49753878565561	1.83685289043481	16.6359353943463	8.48696046548074	16.8489932251647
HORVU1Hr1G046990	15.1344808929564	17.5517216415913	18.5398422002732	30.2989097406618	31.7764512314895	24.5499274652584	14.3569154193575	16.8753018226915	21.6033545464132	18.7701491044161	14.7788245498299	15.5563558950983	18.1910337029482	21.3179575673213	15.9497906120981
HORVU1Hr1G047000	0.797601101078073	0.23491788048019	0.413528078816503	0.474856522730291	0.744313272088943	0.749125947065426	1.98428912300063	1.52502727582842	0.832153385095975	0.814230212292022	1.15588571898111	1.60927819604465	0.795631692773084	0.643560983164416	0.663346189967113
HORVU1Hr1G047010	0.87736121118588	1.04035061355513	0.606507848930871	0.382948808653461	1.73673096820753	0.706318750090259	2.1010120125889	1.62502906440733	0.652669321643902	1.02850132078992	4.9331551220801	3.82000379869186	7.70316138912122	8.56740558837629	18.9127369272846
HORVU1Hr1G047030	9.37181293766736	12.9708229722276	9.82818400653889	3.82948808653461	4.08418051864189	5.73616439467241	4.84399991791329	9.62517215072036	6.46142628427463	5.42105904499688	6.06840002465083	7.62375226207013	9.76457077494239	8.44673790403296	4.36334382733923
HORVU1Hr1G047060	6.99894966196009	6.10786489248494	6.07886275860259	8.25637631456861	5.87816635393319	5.4793212128214	6.4781203721491	7.6251363791421	5.54768923397317	7.22093635637925	7.24492656004232	7.70502893863804	6.7447868500991	7.66239795580133	9.18365947443359
HORVU1Hr1G047090	1.87436258753347	1.3256080398525	0.689213464694172	0.306359046922768	0.744313272088943	0.53508996218959	2.01346984539769	1.02501833293386	3.80179879857573	4.28542216995801	3.01355919591504	2.09693825545213	0.741384077356737	1.18656556270939	0.515935925529977
HORVU1Hr1G047100	0.638080880862458	0.990011067737944	0.344606732347086	0.275723142230492	0.343529202502589	0.599300757652341	0.175084334382408	0.200003577157826	0.0652669321643902	0.17141688679832	0.247689796924524	0.178808688449406	1.12111738527116	0.241335368686656	0.206374370211991
HORVU1Hr1G047110	4.30704594582159	7.48381247815463	11.1790423973395	11.8560951159111	13.5312335874631	7.21301269031567	7.70371071282596	12.0752159709037	7.81571512668572	8.22801056631938	14.2421633231601	15.0361851650637	34.6642262510455	23.3693082011579	44.1346331724786
HORVU1Hr1G047180	26.4205364732112	27.5692912592109	26.3830914284929	23.0075644238999	20.7262618843229	25.3632642077866	35.5129391572318	28.700513322148	18.2421075399471	17.248824234081	21.3219633519194	18.6123589340518	33.5431088657743	24.5156512024195	34.4645198254025
HORVU1Hr1G047220	45.0245821558572	61.3974660483583	24.3016667651165	13.6636134927555	11.7372477521718	8.0905602283066	22.9068670816984	22.8754091374263	5.2866215053156	14.9132691514539	80.1895717543145	18.5310822574839	63.2888846524044	78.2529932966482	171.275986249509
HORVU1Hr1G047300	31.8043439054882	32.4018876576605	34.0471451558921	32.4893769261596	31.1084777821789	29.4085443219399	26.6419995485231	26.3754717376882	25.2909362137012	24.49118770131	27.2458776616976	25.9272598251639	33.1995406348041	30.2875887701753	35.9238814433301
HORVU1Hr1G047350	1.27616176172492	1.59408561754415	1.25436850574339	1.30202594942177	1.31686194292659	1.6908842805191	0.612795170338429	1.47502638153896	0.913737050301463	0.557104882094542	0.825632656415079	0.975320118814942	1.68167607790675	0.744117386783856	0.913943639510245
HORVU1Hr1G047360	0.0398800550539036	0.0167798486057279	0	0	0.229019468335059	0.0428071969751672	0.029180722397068	0.0250004471447282	0	0	0.0825632656415079	0	0.831796769717315	0.643560983164416	1.04661287750367
HORVU1Hr1G047370	0.398800550539037	0.570514852594747	0.330822463053202	0.551446284460983	0.534378759448472	0.321053977313754	0.583614447941361	0.575010284328749	0.407918326027439	0.214271108497901	0.47473877743867	0.650213412543295	0.361650769442311	0.563115860268864	0.368525661092841
HORVU1Hr1G047380	0.398800550539037	0.335596972114557	0.248116847289902	0.49017447507643	0.515293803753884	0.321053977313754	0.612795170338429	0.250004471447282	0.473185258191829	0.514250660394961	0.701787757952817	0.438894053466724	0.48822853874712	0.341891772306096	0.265338475986845
HORVU1Hr1G047390	6.10164842324726	6.52736110762814	2.42603139572348	1.9147440432673	2.15659999348848	2.6112390154852	2.88889151730974	3.92507020172233	2.70857768482219	4.77824571950318	3.71534695386786	3.28357773334364	3.34526961734138	4.30381407491203	4.39282588022666
HORVU1Hr1G047400	1.55532214710224	1.4430669800926	1.19923142856786	1.04162075953741	1.31686194292659	1.71228787900669	0.671156615132565	1.35002414581532	1.61535657106866	1.99272130903048	1.36229388308488	1.67429953729898	1.26577769304809	1.32734452777661	1.03187185105995
HORVU1Hr1G047410	1.55532214710224	1.4430669800926	1.19923142856786	1.04162075953741	1.33594689862118	1.71228787900669	0.671156615132565	1.37502459296005	1.61535657106866	2.03557553073006	1.36229388308488	1.70681020792615	1.26577769304809	1.3474558085005	1.04661287750367
HORVU1Hr1G047440	3.36986465205486	6.98041701998279	4.61773021345095	2.22110309019007	4.10326547433648	1.99053465934527	3.41414452045696	6.30011268047151	1.51745617282207	3.59975462276473	6.2748081887546	7.29864555579848	31.8614327878676	8.02440100883131	9.77330053218214
HORVU1Hr1G047550	22.6518712706173	19.6324228687016	17.850628735579	27.556996270703	23.1882211689248	30.3717062538811	28.0134935011853	27.9755003549509	27.0531433821397	34.0048249186168	22.4778490709005	22.7412141037017	17.5038972410078	21.2375124444257	16.5836547491778
HORVU1Hr1G047560	37.8860523012085	31.445436287134	31.0283901805316	46.3827597041071	40.1165768700246	49.8917880745574	52.2918545355459	43.8507842918533	46.0621373750184	56.8032708627934	38.6396083202257	37.20846253279	29.4564551710762	35.556744319834	27.2708989208702
HORVU1Hr1G047570	2.39280330323422	2.23171986456181	1.6678965845599	1.99133380499799	1.58405132265083	1.49825189413085	3.93939752360418	1.52502727582842	1.86010756668512	2.18556530667859	2.80715103181127	2.3082576145287	1.79017130873944	1.6692363000827	0.692828242854541
HORVU1Hr1G047610	195.372389709074	203.539563587479	207.742722528117	173.429856462979	68.514990943572	78.1873452751429	44.179613709161	53.5009568897183	88.0777249558445	83.3728883165331	62.0256533131828	79.6836537071808	60.7754118047803	54.3004579544976	42.8374228454318
HORVU1Hr1G047620	194.853948993373	202.801250248827	206.681333792488	172.786502464441	68.4577360764882	78.1017308811926	44.1212522643669	53.35095420685	87.6698066298171	83.1157629863356	61.9843716803621	79.2935256596548	60.5222562661707	54.1395677087065	42.6163074487761
HORVU1Hr1G047640	10.4884544791767	13.6923564622739	20.2766601313025	22.7012053769771	27.1960618647883	25.3632642077866	14.2110118073721	28.2005043792534	21.4401872160022	17.655939340227	16.6571388431742	24.6268330000773	23.16373178278	20.292282250403	23.5414192306107
HORVU1Hr1G047680	22.6917513256712	23.5589074424419	24.1913926107654	24.4321339920908	23.2454760360085	23.1158863665903	19.6678068956239	17.5753143427439	26.1394063318383	25.7339601305979	20.2486408985798	22.2535540442943	22.5670080132002	24.8374316940017	21.875683242471
HORVU1Hr1G047690	18.3847053798496	16.3435725419789	15.603792840676	17.3092861511364	16.2603822517892	15.7958556838367	13.277228690666	11.4752052394302	18.3400079381936	20.1629113096524	17.028673538561	21.7333833142596	16.2562020864319	18.4420444238053	17.0848496482641
HORVU1Hr1G047710	11.2262354976739	8.4906033944983	7.85703349751356	12.2696798292569	20.4972424159878	18.8351666690736	40.6779270215128	28.8005151107269	15.5987967872893	13.1991002834707	11.2079633108347	9.39558381125061	10.5421199292434	9.83441627398123	9.65537232063243
HORVU1Hr1G047730	19.880207444371	26.5960600400787	33.7301069621328	34.0364901131196	37.9027220094523	33.411017239118	23.578023696831	32.0005723452521	32.5518824169896	27.4909832202806	31.8074980883909	38.0699953044099	42.1865622554456	33.3847260016541	51.1955848390174
HORVU1Hr1G047740	0.319040440431229	0.0167798486057279	0.096489885057184	0.0153179523461384	0.286274335418824	0.0856143939503344	0.29180722397068	0.0500008942894564	0.73425298684939	1.17849109673845	1.03204082051885	0.0162553353135824	0.108495230832693	0.120667684343328	0
HORVU1Hr1G047770	0.139580192688663	0	0.0275685385877669	0	0.629803537921414	0	0	0.125002235723641	0.0163167330410975	0.0428542216995801	0.0412816328207539	0.0487660059407471	0.904126923605777	0.724006106059968	1.45936161792765
HORVU1Hr1G047800	1.59520220215615	1.24170879682386	1.57140669950271	1.56243113930612	1.75581592390212	1.11298712135435	1.10886745108859	1.10001967436804	2.43119322312353	2.33555508262712	1.89895510975468	2.66587499142751	2.65813315540098	2.1720183181799	2.94820528874273
HORVU1Hr1G047820	48.2349265876965	51.4805755223731	57.8525782264288	47.0720675596834	39.7157928004382	49.9988060669953	51.883324421987	47.275845550681	36.7289660755106	38.375955531974	39.2381919961266	37.4522925624938	29.6734456327416	35.2751863896996	28.3912169305924
HORVU1Hr1G047930	0	0.0503395458171836	0.0275685385877669	0	1.4695415884833	0.0214035984875836	0	0.0250004471447282	0.310017927780853	0.214271108497901	1.38293469949526	0.390128047525977	9.96347869813567	4.58537200504646	7.11991577231368
HORVU1Hr1G047980	17.4475240860828	16.6623896654878	17.7954916584035	17.9679581020204	16.1077026062325	16.9516500021662	18.4130358325499	16.3002915383628	15.4029959907961	16.1131873590421	14.4898531200846	16.6454633611083	15.5690656244915	13.9170062609305	17.5565624944629
HORVU1Hr1G047990	55.1142360844948	39.8185807413922	40.4706146468418	35.4916955860027	29.7916158392523	38.8903384519394	44.4714209331317	37.6506733999607	42.1298047121139	49.6466158389636	39.1969103633059	37.8586759453333	31.9156804032839	44.0638160660386	38.7541585205231
HORVU1Hr1G048000	62.5319263245209	48.0910461040161	48.0795312970654	38.4480603888074	31.7955361871841	41.8654386417135	43.2750113148519	39.8507127486967	45.4584182524978	52.2178691409384	40.1670287345936	39.3216561235557	33.7239342504955	44.2247063118297	39.2553534196094
HORVU1Hr1G048010	0.0199400275269518	0.117458940240095	0.0413528078816503	0.0765897617306921	0.152679645556706	0.23543958336342	0.204265056779476	0.175003130013097	0.146850597369878	0.12856266509874	0.144485714872639	0.178808688449406	0.16274284624904	0.120667684343328	0.0737051322185681
HORVU1Hr1G048080	0.737781018497218	0.453055912354652	1.10274154351067	0.260405189884353	0.55346371514306	0.406668371264088	0.671156615132565	0.625011178618205	0.636352588602804	0.835657323141812	0.577942859490555	0.601447406602548	0.506311077219235	0.543004579544976	0.781274401516822
HORVU1Hr1G048090	1.45562200946748	1.04035061355513	2.12277747125805	1.08757461657583	0.801568139172708	0.470879166726839	1.78002406622115	0.675012072907661	1.10953784679463	1.24277242928782	1.71318776206129	1.25166081914584	0.48822853874712	1.02567531691829	2.13744883433848
HORVU1Hr1G048100	0.43868060559294	0.55373500398902	0.827056157633006	0.628036046191675	0.305359291113413	0.23543958336342	0.29180722397068	0.500008942894564	0.407918326027439	0.342833773596641	0.763710207183948	0.503915394721053	0.32548569249808	0.442448175925536	1.17928211549709
HORVU1Hr1G048110	0.398800550539037	0.570514852594747	0.895977504102423	0.536128332114845	0.209934512640471	0.0856143939503344	0.262626501573612	0.125002235723641	0.668986054684999	0.385687995296221	0.598583675900932	0.747745424424789	0.361650769442311	0.241335368686656	1.1940231419408
HORVU1Hr1G048120	0.159520220215615	0.352376820720285	0.510017963873687	0.336994951615045	0.190849556945883	0.128421590925502	0	0.200003577157826	0.342651393863048	0.364260884446431	0.743069390773571	0.34136204158523	0.16274284624904	0.341891772306096	0.545417978417404
HORVU1Hr1G048130	310.565928732275	266.14517873545	293.301682035252	384.051701222383	267.45656910396	339.974758376778	381.829752565635	245.379388725507	403.757559101959	361.046817818962	248.06133161991	324.927897583198	215.037547510398	265.187347625187	156.136952091815
HORVU1Hr1G048140	26.2610162529956	39.8521404386037	70.5341059768015	104.407163191279	54.6783980649954	36.3861174288921	29.0348187850827	37.3756684813687	62.2483365517871	24.7483130315075	37.7520532145795	86.9010225864113	46.3997937194485	34.3098449149529	42.9848331098689
HORVU1Hr1G048150	0.578260798281603	1.19136925100668	1.9987190476131	1.07225666422969	0.362614158197178	0.449475568239256	1.31313250786806	1.05001878007858	0.848470118137072	0.835657323141812	0.928836738466964	0.975320118814942	0.560558692635582	0.522893298821088	0.751792348629395
HORVU1Hr1G048160	0.0199400275269518	0.134238788845823	0.0413528078816503	0.183815428153661	0.0763398227783532	0.0642107954627508	0.320987946367748	0.150002682868369	0.163167330410975	0.10713555424895	0.412816328207539	0.0812766765679118	0.0542476154163466	0.181001526514992	0.471712846198836
HORVU1Hr1G048170	1.35592187183272	1.25848864542959	2.52252128078067	1.73092861511364	0.973332740424003	0.470879166726839	0.962963839103245	1.12502012151277	1.74589043539744	1.0713555424895	2.20856735591034	2.2107256026472	0.922209462077893	1.62901373863493	2.78605399786188
HORVU1Hr1G048180	0.299100412904277	0.419496215143197	0.84084042692689	0.520810379768706	0.11450973416753	0.0428071969751672	0.933783116706177	0.0500008942894564	0.473185258191829	0.321406662746851	0.288971429745278	0.520170730034636	0.16274284624904	0.321780491582208	0.781274401516822
HORVU1Hr1G048230	31.1064429420448	37.4526220879846	38.9405607552207	39.5815888624217	54.468463552355	51.0903895898621	29.2390838418622	43.2257731132351	60.1924281886088	51.5964829262945	42.6232858874285	45.8563009196159	45.8934826422293	43.2191422756353	41.540212518385
HORVU1Hr1G048250	26.7794569686963	29.8177909723784	31.7451721838136	30.1916840742388	39.0669043068222	35.7012022772894	24.9203369270961	30.5755468580026	48.0854122721145	42.5756692585328	34.3050368740465	35.3390989717281	33.3442009425811	33.3847260016541	31.1625299020106
HORVU1Hr1G048280	20.7974487106108	24.5489185101799	18.7466062396815	16.4821167244449	9.02718404354026	9.80284810731329	10.7676865645181	10.5251882479306	10.6548266758367	8.57084433991602	8.50401636107531	10.6147339597693	8.35413277411738	7.72273179797299	6.57449779389628
HORVU1Hr1G048290	0.997001376347591	1.64442516336133	1.77817073891096	1.85347223388275	1.37411681001036	1.39123390169293	3.06397585169214	2.02503621872298	7.04882867375414	11.120670531041	10.9189918810894	9.02171109903821	2.76662838623368	3.98203358332982	1.88685138479534
HORVU1Hr1G048340	7.71679065293036	7.66839081281764	5.26559087026347	5.80550393918646	7.25228316394355	11.1298712135435	7.90797576960544	13.3502387752849	10.5895597436723	10.9921078659423	7.92607350158476	5.9006867188304	8.0286470816193	9.53274706312291	9.50796205619529
HORVU1Hr1G048350	5.06476699184576	4.56411882075798	3.73553697864241	3.38526746849659	3.05359291113413	2.80387140187345	3.50168668764816	3.15005634023575	3.344930273425	3.51404617936557	3.19932654360843	4.21013184621783	2.82087600165002	2.89602442423987	2.72708989208702
HORVU1Hr1G048360	3.40974470710876	3.60766745023149	3.18416620688707	3.40058542084273	6.66064953741131	4.15229810659122	4.31874691476607	4.17507467316961	4.81343624712378	5.22821504734878	6.37801227080648	4.9741326059562	11.7717325453472	7.82328820159243	12.7362468473686
HORVU1Hr1G048380	2.2332830830186	1.91290274105298	1.19923142856786	1.30202594942177	0.744313272088943	1.1771979168171	2.07183129019183	1.67502995869679	1.63167330410975	1.82130442223216	1.5274204143679	0.731490089111206	1.57318084707405	1.48823477356771	1.5183257237025
HORVU1Hr1G048390	13.1005980852073	13.8433750997255	13.481015369418	10.5234332617971	8.93175926506732	9.46039053151195	9.9506263374002	8.12514532203666	8.90893624043926	9.04224077861141	7.84351023594325	9.05422176966538	9.54758031327701	9.51263578239902	8.7561697075659
HORVU1Hr1G048400	27.1184374366545	27.5525114106052	29.1399452872696	31.5549818330452	23.3981556815652	27.8674852308339	29.6476139554211	24.8254440147151	24.2956154981942	23.7412388215674	20.9297878401223	26.3173878726899	19.6918843961338	20.5738401805374	15.9645316385419
[truncated: 25,351 more rows]
