# Supplementary material for: WAX INDUCER 1 Regulates β-Diketone Biosynthesis by Mediating Expression of the Cer-cqu Gene Cluster in Barley
Source: Int J Mol Sci. 2023 Apr 5;24(7):6762. doi: 10.3390/ijms24076762 (PMC10095013; doi:10.3390/ijms24076762)
Supplement: Supplementary file 1 [file ijms-24-06762-s001.zip › Table_S9_counts.csv]

Table S9. Raw counts of gene expression obtained using DART mapper and featureCounts function of the Subread package
Geneid	lb_wt.1	lb_wt.2	lb_wt.3	lb_wt.4	lb_win1.1	lb_win1.2	lb_win1.3	lb_win1.4	ls_wt.1	ls_wt.2	ls_wt.3	ls_wt.4	ls_win1.1	ls_win1.2	ls_win1.3	ls_win1.4
EPlHVUG00000039890	10	38	62	20	6	7	3	4	12	4	10	17	13	10	2	22
EPlHVUG00000039869	3	8	8	7	4	1	0	1	1	1	11	2	0	3	2	10
EPlHVUG00000039881	14	33	50	22	12	10	16	12	70	50	35	54	22	30	16	29
EPlHVUG00000039856	104	156	236	87	74	48	45	61	133	120	169	88	81	135	53	264
EPlHVUG00000039852	25	44	45	18	17	11	29	18	27	62	52	36	25	27	16	91
EPlHVUG00000039857	10	16	18	6	1	1	0	7	6	9	19	7	7	4	9	14
EPlHVUG00000039865	0	10	10	21	5	4	0	5	4	1	2	9	4	7	2	15
EPlHVUG00000039878	2	0	0	0	0	0	0	0	1	0	1	1	0	2	0	0
EPlHVUG00000039882	0	2	1	0	2	0	1	0	0	0	2	0	3	0	0	3
EPlHVUG00000039870	10	48	74	26	8	8	11	7	15	13	15	20	15	14	6	23
EPlHVUG00000039891	46	171	238	69	42	33	46	46	68	69	60	62	57	66	34	99
EPlHVUG00000039875	23	34	46	14	16	25	18	23	35	47	28	17	28	44	19	46
EPlHVUG00000039888	1	9	10	4	6	6	3	10	11	20	14	6	9	14	3	14
EPlHVUG00000039883	8	19	26	5	5	3	0	2	2	8	5	10	3	2	2	3
EPlHVUG00000039863	29	64	96	51	40	33	37	41	74	49	78	62	40	48	20	101
EPlHVUG00000039853	86	88	132	58	37	35	53	39	94	95	137	82	59	102	45	177
EPlHVUG00000039851	22	26	37	15	12	11	11	14	17	30	36	23	17	41	10	81
EPlHVUG00000039877	0	0	1	2	0	0	0	0	0	0	0	1	1	1	1	1
EPlHVUG00000039848	2	0	0	0	0	0	0	0	1	0	1	1	0	2	0	0
EPlHVUG00000039858	0	4	1	0	2	0	1	0	0	0	2	0	2	0	0	3
EPlHVUG00000039871	65	91	149	53	25	40	22	33	58	59	67	58	35	41	22	107
EPlHVUG00000039893	18	20	56	24	16	6	17	22	33	34	48	31	25	36	20	49
EPlHVUG00000039867	56	55	125	40	24	18	20	43	35	71	65	54	35	48	25	101
EPlHVUG00000039879	56	74	169	70	50	46	30	31	76	61	63	71	56	68	42	73
EPlHVUG00000039849	31	43	50	22	13	8	18	15	17	29	41	22	22	18	8	50
EPlHVUG00000039855	0	10	10	21	5	4	0	5	4	1	2	9	4	7	2	15
EPlHVUG00000039894	4	10	7	2	4	1	3	1	3	3	5	6	2	4	1	5
EPlHVUG00000039850	176	223	323	114	109	89	101	138	208	255	289	148	159	267	114	438
EPlHVUG00000039864	69	84	138	54	44	33	38	46	75	106	94	65	38	66	28	142
EPlHVUG00000039861	17	24	33	19	15	2	9	14	19	24	18	12	9	12	7	39
EPlHVUG00000039873	6	20	18	8	6	3	15	5	16	19	10	11	4	14	7	18
EPlHVUG00000039880	18	20	56	24	16	6	17	22	33	34	48	31	25	36	20	49
AGP50735	25181	29348	37390	16669	13965	14288	9097	15389	24934	17054	21612	14892	8981	13908	6956	16706
AGP50736	42	106	248	115	34	21	63	44	71	31	101	121	83	64	45	344
AGP50737	664	704	1029	1264	537	428	545	335	868	394	357	775	434	372	260	575
AGP50738	52	57	70	85	41	36	155	62	51	51	101	58	24	96	61	143
AGP50739	12	9	53	29	21	3	52	12	30	7	31	40	15	24	22	69
AGP50740	2669	2474	3611	2690	2549	2119	1501	2500	2975	2101	2499	2406	2143	2051	1722	2701
AGP50741	3212	3070	5018	3684	3371	2606	2234	3178	3398	3007	3675	3273	3113	2819	2285	4519
AGP50742	13	11	76	73	15	8	42	11	41	18	44	63	32	42	39	189
AGP50743	1135	1264	2806	3965	913	752	1296	505	1465	527	512	1886	462	597	530	984
AGP50744	13	23	38	39	18	3	15	11	29	1	20	31	9	9	1	47
AGP50745	64	101	156	29	14	15	14	21	47	37	50	53	40	34	23	80
AGP50746	72	113	145	57	35	22	38	36	63	51	67	62	24	39	19	122
AGP50747	76	116	207	85	31	36	86	58	67	62	115	97	68	103	46	186
AGP50748	20	51	67	47	10	19	7	32	35	34	55	45	38	34	21	113
AGP50749	185	160	373	225	121	87	188	151	271	197	254	298	163	182	126	483
AGP50750	128	128	154	110	95	91	175	193	159	212	232	127	99	141	78	229
AGP50751	1301	1586	2535	2237	1233	1095	1931	956	1817	1244	1039	1762	932	976	746	1458
AGP50752	1006	1035	1475	1258	936	876	1289	1355	1372	1288	1520	1349	953	1125	900	1745
AGP50753	421	448	855	634	396	358	260	306	412	232	345	453	312	309	208	515
AGP50754	2016	2202	3889	2466	1663	1653	1539	1732	1785	1353	1890	1688	1294	1499	1084	2569
AGP50755	1817	1723	3163	1676	1429	1546	1605	1776	1528	1356	1744	1375	1028	1441	961	2247
AGP50756	97	139	259	121	98	66	134	127	183	144	239	164	136	153	71	354
AGP50757	44	54	98	57	51	15	91	60	76	76	124	124	107	108	67	286
AGP50758	191	336	579	735	363	344	127	322	275	160	262	474	296	252	260	364
AGP50759	334	443	1004	1104	476	402	280	366	552	251	287	628	427	353	269	587
AGP50760	243	219	569	530	209	206	301	230	346	211	147	340	207	182	161	258
AGP50761	194	222	306	144	137	124	191	224	201	203	279	171	145	165	121	335
AGP50762	737	609	831	354	381	391	617	634	546	620	772	494	370	573	330	924
AGP50763	5665	6442	9955	4515	4929	3945	10853	9713	7717	7804	12235	8870	6026	7745	6704	12379
AGP50764	3	3	4	2	2	1	13	5	1	5	8	2	0	5	0	6
AGP50765	94	80	185	114	63	52	117	74	134	123	157	119	72	99	63	249
AGP50766	71	83	184	81	59	28	92	50	85	53	98	93	72	61	40	218
AGP50767	260	269	400	215	187	167	260	243	281	270	350	297	201	239	161	578
AGP50768	250	230	310	261	194	161	228	207	370	145	217	261	153	158	116	325
AGP50769	49	64	112	84	41	30	52	55	76	57	83	66	59	60	28	205
AGP50770	136	138	205	118	109	85	94	159	172	154	268	130	123	142	97	299
AGP50771	162	178	287	153	132	110	141	195	212	176	287	173	117	159	105	372
AGP50772	12	10	12	14	7	12	22	9	5	31	17	6	2	19	11	13
AGP50773	22	63	159	167	65	37	21	16	92	18	33	116	57	36	16	124
AGP50774	21	28	90	130	47	37	34	27	50	7	73	98	50	43	38	122
AGP50775	24	24	117	168	96	102	44	23	83	35	66	93	74	62	50	115
AGP50776	30	24	157	249	76	66	31	24	80	14	30	64	28	34	17	107
AGP50777	19	40	70	42	34	18	25	22	28	40	45	39	25	27	23	83
AGP50779	84	139	219	117	58	64	74	74	91	81	76	76	46	54	49	98
AGP50780	1699	1753	2401	1706	1379	1395	1328	1665	2000	1910	2048	1566	1163	1618	943	2348
AGP50781	46	45	165	132	31	17	22	29	60	9	46	82	37	47	31	152
AGP50782	29	26	105	53	25	23	12	26	55	36	35	53	19	26	17	72
AGP50783	147	160	249	141	105	97	136	141	173	161	157	143	96	121	76	176
AGP50784	493	537	883	572	380	380	313	483	590	439	556	513	315	367	215	633
AGP50785	489	517	846	477	343	295	336	359	553	442	548	449	247	344	232	574
AGP50786	41	75	125	79	57	36	46	37	81	39	80	80	64	73	30	219
AGP50787	21	21	49	34	20	23	16	28	26	14	39	27	35	29	15	72
AGP50788	6	8	14	11	6	0	1	3	4	9	6	8	8	11	4	27
AGP50789	53	49	76	49	31	27	60	50	70	19	37	47	57	64	31	127
AGP50790	44	52	123	74	37	27	69	28	56	27	43	49	50	38	35	163
AGP50791	18	45	73	42	43	23	64	28	41	23	50	54	46	50	29	141
AGP50792	36	49	65	40	23	31	42	48	44	43	68	42	44	60	43	132
AGP50793	25	39	70	36	18	10	27	17	29	20	36	33	35	20	18	114
AGP50794	28	31	59	32	26	23	53	39	41	24	54	38	50	55	28	108
AGP50795	34	52	67	48	41	25	50	33	80	55	68	78	71	59	39	142
AGP50796	23	34	39	24	30	21	45	36	39	23	66	49	59	44	20	112
AGP50797	4	12	14	6	6	3	5	7	8	11	11	8	4	16	5	18
AGP50798	265	381	734	489	291	167	190	236	510	245	501	670	418	366	282	945
AGP50799	212	317	462	371	227	176	201	210	354	222	272	388	241	234	155	435
AGP50800	15	25	61	34	6	2	32	2	29	15	14	32	9	16	12	53
AGP50801	17904	19183	27697	33240	17470	18132	15280	11794	29819	18690	14954	26441	14894	15818	10993	14855
AGP50802	68	75	183	113	51	22	33	45	107	50	107	136	51	81	39	189
AGP50803	2	8	6	18	4	3	18	8	12	6	28	9	7	11	10	37
AGP50804	29	71	145	70	19	21	45	42	52	39	45	60	31	26	23	51
AGP50805	1317	2375	5117	6816	2865	1700	995	1495	3815	1155	1829	5347	2567	1706	1531	2916
AGP50806	15575	15861	21278	25072	14014	15884	13085	9815	24745	16850	12018	19989	11892	13186	8979	10592
AGP50807	8	21	37	22	10	6	0	8	21	17	36	21	9	17	10	37
AGP50808	20	34	65	35	11	4	9	5	41	18	29	46	20	12	12	81
AGP50809	22	33	60	41	16	11	10	20	25	16	37	31	18	22	9	80
AGP50810	26	16	35	17	9	7	21	8	20	16	25	15	9	19	10	44
HORVU1Hr1G000010	1006	954	954	1171	1214	1120	944	776	1387	1222	1003	1057	1058	1115	706	1273
HORVU1Hr1G000020	4172	5257	5747	4881	3676	4010	1881	2128	4426	3240	2371	3000	2142	2224	1809	2029
HORVU1Hr1G000030	6	6	11	11	14	8	1	9	17	10	7	7	19	11	3	16
HORVU1Hr1G000040	1515	1979	2175	1426	1942	1479	2482	2170	1747	1384	2264	1794	3856	2979	1476	6729
HORVU1Hr1G000060	876	1476	1979	2144	1588	1381	992	1153	2091	1563	1578	2541	1596	1528	1221	2024
HORVU1Hr1G000080	3816	3479	4128	3854	2514	2615	2023	1502	3577	3313	2551	3312	3240	2712	1918	3432
HORVU1Hr1G000090	638	994	870	791	630	409	436	426	911	791	728	1088	1012	889	579	1344
HORVU1Hr1G000110	2070	2429	2807	2479	1259	1539	770	1067	1560	1039	1175	1676	1008	1025	765	1059
HORVU1Hr1G000120	5421	5558	5600	3099	2470	2201	1477	1307	3198	2698	1862	2166	1395	1342	1242	658
HORVU1Hr1G000140	1169	4071	2624	2576	1994	1657	687	1329	2090	1358	1412	2225	1973	1254	1464	2067
HORVU1Hr1G000150	1	0	0	1	0	0	0	0	1	0	1	0	0	0	0	3
HORVU1Hr1G000160	0	0	0	0	0	0	0	0	4	9	32	12	30	1	0	5
HORVU1Hr1G000170	0	0	1	1	352	2	112	38	94	123	570	143	148	301	196	465
HORVU1Hr1G000190	0	0	0	0	0	0	0	0	0	0	10	2	0	0	1	0
HORVU1Hr1G000200	0	0	0	0	0	0	0	0	0	0	0	0	0	0	0	0
HORVU1Hr1G000210	14	30	49	54	78	31	17	23	99	112	109	137	100	86	80	113
HORVU1Hr1G000230	62	84	61	16	16	16	6	1	174	98	20	49	36	23	71	30
HORVU1Hr1G000240	0	0	0	0	0	0	0	0	1	0	0	0	0	0	0	0
HORVU1Hr1G000250	26	31	52	78	95	48	36	56	116	153	106	188	135	119	121	145
HORVU1Hr1G000260	8	12	10	8	10	5	2	10	19	13	11	18	8	12	11	25
HORVU1Hr1G000270	272	285	347	371	296	274	189	163	440	350	289	397	266	315	191	347
HORVU1Hr1G000290	2925	4723	6122	7038	5921	5537	1727	3383	5491	3521	3285	4900	4727	3723	3307	4704
HORVU1Hr1G000310	867	875	820	697	550	533	479	340	745	698	511	485	458	506	350	505
HORVU1Hr1G000320	0	0	0	1	0	0	0	0	0	0	0	0	1	0	0	0
HORVU1Hr1G000330	3	10	0	0	0	0	0	1	0	0	0	124	12	0	0	0
HORVU1Hr1G000340	213	1034	184	17	1	0	0	0	0	5	40	2395	114	2	10	2
HORVU1Hr1G000350	3180	5250	4262	3635	3036	3159	2618	2590	2403	1775	2254	8770	3516	2157	1913	2943
HORVU1Hr1G000370	0	0	0	0	0	0	0	0	0	0	0	0	0	0	0	0
HORVU1Hr1G000400	7	1	6	3	6	4	1	3	9	7	4	7	3	4	2	6
HORVU1Hr1G000430	2469	2808	3093	2875	2341	2630	2400	2268	1762	1336	1527	2020	1801	1685	1439	2156
HORVU1Hr1G000440	724	3593	730	76	50	6	3	11	6	23	408	8514	2094	23	52	51
HORVU1Hr1G000450	38	155	45	3	9	0	0	2	0	0	42	553	256	5	1	13
HORVU1Hr1G000470	67	405	132	11	15	0	0	6	0	1	165	900	1349	3	18	22
HORVU1Hr1G000520	971	712	984	1395	608	562	148	461	1194	730	655	445	370	445	381	313
HORVU1Hr1G000530	1220	1791	1786	1693	1758	1217	792	911	1558	1252	1354	1656	1862	1513	991	2734
HORVU1Hr1G000540	0	1	0	0	0	0	0	0	0	0	0	0	0	0	0	1
HORVU1Hr1G000550	0	0	0	1	2	0	0	0	0	0	0	0	0	0	0	0
HORVU1Hr1G000560	110	437	360	66	22	14	6	10	249	132	58	87	116	63	124	136
HORVU1Hr1G000590	6	2	3	2	4	0	2	2	5	3	0	3	12	5	2	17
HORVU1Hr1G000600	1770	2028	2167	2210	1180	1161	509	684	1266	1077	815	1038	724	651	510	851
HORVU1Hr1G000620	441	543	705	792	616	604	443	503	877	627	588	857	642	669	527	810
HORVU1Hr1G000640	0	0	0	0	0	0	0	0	0	0	0	0	0	0	0	0
HORVU1Hr1G000650	0	0	0	0	0	0	0	0	0	0	0	0	0	0	0	0
HORVU1Hr1G000660	2041	2358	3257	1897	1213	879	530	961	3055	1555	1435	2782	1587	1331	1693	2140
HORVU1Hr1G000680	0	0	0	0	0	0	2	0	0	0	0	0	0	0	0	0
HORVU1Hr1G000690	5	10	4	3	13	9	5	21	5	6	9	6	14	7	8	21
HORVU1Hr1G000700	0	0	0	0	0	0	0	0	0	0	0	0	0	0	0	0
HORVU1Hr1G000710	7771	9125	10622	6328	3796	4276	6056	5543	3909	3207	5024	5046	6224	4760	3429	9211
HORVU1Hr1G000720	2465	2373	3163	5132	2319	2340	3528	2481	3491	3286	2994	4560	2077	2246	1879	3170
HORVU1Hr1G000730	0	0	0	0	0	1	0	0	0	0	0	0	0	0	0	0
HORVU1Hr1G000810	12	48	66	46	31	18	2	9	403	213	157	228	211	146	119	45
HORVU1Hr1G000830	5	5	5	4	8	3	2	0	2	2	3	7	11	9	6	43
HORVU1Hr1G000840	0	0	0	0	0	0	0	2	0	0	0	2	0	0	0	1
HORVU1Hr1G000850	0	0	0	0	0	0	0	0	0	1	0	0	0	0	0	0
HORVU1Hr1G000860	4	12	18	14	17	4	10	13	5	9	11	10	43	20	5	76
HORVU1Hr1G000900	0	3	0	0	0	0	0	0	1	0	1	2	1	2	0	1
HORVU1Hr1G000910	1	2	1	1	1	2	1	0	1	1	2	1	3	9	1	14
HORVU1Hr1G000920	0	0	0	0	1	1	0	0	0	0	0	0	0	0	0	0
HORVU1Hr1G000930	1	0	0	0	0	0	0	0	0	0	0	0	0	0	0	0
HORVU1Hr1G000940	742	800	763	631	420	410	572	331	387	510	522	476	468	483	319	580
HORVU1Hr1G000960	759	726	978	1146	573	569	477	455	789	708	633	744	462	441	349	509
HORVU1Hr1G000990	1547	3792	1246	665	275	294	246	208	980	539	331	460	336	355	376	312
HORVU1Hr1G001020	0	0	0	0	1	0	12	0	0	0	0	0	0	0	0	0
HORVU1Hr1G001030	0	0	0	0	0	0	0	0	0	0	0	0	0	0	0	0
HORVU1Hr1G001040	0	0	0	0	0	0	0	0	0	0	0	0	0	0	0	0
HORVU1Hr1G001050	0	0	0	0	0	0	0	0	0	0	0	0	0	0	0	0
HORVU1Hr1G001060	0	0	0	0	0	1	0	1	0	0	0	0	1	1	2	0
HORVU1Hr1G001080	0	0	0	0	0	0	2	0	0	0	0	0	0	0	0	0
HORVU1Hr1G001090	0	0	0	0	0	0	0	0	0	0	0	0	0	0	0	0
HORVU1Hr1G001120	16	11	26	18	14	7	41	11	10	6	17	13	8	18	6	10
HORVU1Hr1G001140	0	0	0	0	0	0	7	0	0	0	0	0	0	0	0	0
HORVU1Hr1G001150	0	0	0	0	0	0	0	0	0	0	1	0	0	0	0	0
HORVU1Hr1G001160	0	0	0	0	0	0	0	0	0	0	0	0	0	0	0	0
HORVU1Hr1G001170	0	0	0	0	0	0	0	0	0	0	0	0	0	0	0	0
HORVU1Hr1G001200	181	170	168	177	115	118	34	57	148	131	118	98	72	72	50	70
HORVU1Hr1G001220	1131	3042	703	141	15	20	10	13	260	150	30	63	69	65	112	46
HORVU1Hr1G001260	0	0	0	0	0	0	0	0	0	0	0	0	0	0	0	0
HORVU1Hr1G001270	146	261	323	349	322	300	164	164	301	270	246	325	244	252	218	320
HORVU1Hr1G001300	1	0	0	0	0	0	0	0	0	0	0	0	0	0	0	0
HORVU1Hr1G001350	0	0	0	0	0	0	14	0	0	0	0	0	0	0	0	0
HORVU1Hr1G001390	1	2	0	2	4	0	0	0	1	0	0	0	0	0	0	1
HORVU1Hr1G001400	0	0	0	0	0	0	0	0	0	0	0	0	0	0	0	0
HORVU1Hr1G001420	0	0	0	0	0	0	28	0	0	0	0	0	0	0	0	0
HORVU1Hr1G001440	0	0	0	1	1	0	1	0	0	0	0	0	0	0	0	0
HORVU1Hr1G001450	0	0	0	0	0	1	0	0	0	1	2	0	1	1	0	1
HORVU1Hr1G001460	1	0	2	1	0	0	0	0	0	2	0	0	40	61	0	190
HORVU1Hr1G001480	0	0	0	0	3	0	1	0	0	0	0	0	35	56	0	112
HORVU1Hr1G001490	2	3	13	9	6	11	0	5	21	10	19	19	7	11	8	3
HORVU1Hr1G001500	2	0	0	0	0	0	0	0	0	0	0	0	0	0	0	0
HORVU1Hr1G001510	2454	2759	3021	3937	2774	2342	1423	1203	14063	14513	12003	12834	4949	8771	7051	3965
HORVU1Hr1G001520	1	9	3	2	9	5	1	3	4	4	4	6	1	8	0	1
HORVU1Hr1G001540	0	0	0	0	0	0	0	0	0	0	0	0	0	0	0	0
HORVU1Hr1G001560	99	93	113	103	92	48	44	53	376	341	358	216	132	150	227	99
HORVU1Hr1G001570	1879	1987	1957	2825	1876	1675	940	646	11477	12237	10196	10495	3687	7166	5607	2600
HORVU1Hr1G001580	1	2	6	1	2	3	0	0	7	1	1	1	2	0	1	0
HORVU1Hr1G001590	193	281	375	387	273	252	195	268	140	124	146	250	349	264	166	476
HORVU1Hr1G001600	0	0	0	0	0	0	0	0	0	0	0	0	0	0	0	0
HORVU1Hr1G001610	0	0	0	0	0	0	0	0	1	0	0	2	0	0	0	0
HORVU1Hr1G001630	12	12	36	32	35	17	6	20	30	10	16	14	11	19	16	17
HORVU1Hr1G001660	3423	3114	3486	3190	1832	2720	854	1853	3348	1600	1189	2230	1662	1413	1638	1465
HORVU1Hr1G001670	555	752	749	704	345	418	109	301	860	330	292	632	495	379	488	478
HORVU1Hr1G001680	0	5	7	6	1	1	0	0	36	24	32	34	14	27	14	3
HORVU1Hr1G001690	0	0	0	0	0	0	0	0	1	0	0	2	0	0	0	0
HORVU1Hr1G001700	1	2	5	1	2	2	0	0	7	1	1	0	2	1	1	0
HORVU1Hr1G001710	0	1	1	1	81	2	10	28	4	0	3	6	64	22	6	69
HORVU1Hr1G001750	293	441	586	617	511	431	398	344	958	865	664	818	583	710	472	891
HORVU1Hr1G001760	218	440	631	391	407	174	84	134	504	280	405	746	515	372	241	793
HORVU1Hr1G001770	175	156	463	640	280	220	221	327	687	366	438	771	555	380	605	425
HORVU1Hr1G001800	382	516	604	372	410	244	202	169	678	548	594	671	469	446	372	818
HORVU1Hr1G001810	5	6	4	5	2	4	0	3	10	1	7	19	4	4	7	13
HORVU1Hr1G001850	0	0	0	0	1	0	0	1	0	2	3	2	1	1	2	0
HORVU1Hr1G001860	1	0	2	0	1	0	1	1	0	0	0	0	0	1	0	1
HORVU1Hr1G001890	7356	7320	8016	10109	6746	8498	8304	7021	6384	4762	4134	5663	4431	4868	4100	3890
HORVU1Hr1G001910	1565	1847	2293	1914	1121	1001	722	832	1508	1199	1046	1382	1652	1389	895	2315
HORVU1Hr1G001920	52	62	90	67	102	67	98	50	99	94	95	114	260	137	69	161
HORVU1Hr1G001950	5	3	2	7	8	5	10	4	181	212	88	79	59	79	75	36
HORVU1Hr1G001960	1	1	2	0	1	0	4	0	17	13	7	11	5	6	5	7
HORVU1Hr1G001970	1	2	0	0	0	0	0	4	2	4	4	2	7	1	0	4
HORVU1Hr1G001990	12	18	6	19	16	16	0	6	20	20	22	18	12	16	11	14
HORVU1Hr1G002000	7	0	1	5	1	5	1	4	9	5	2	7	14	2	8	1
HORVU1Hr1G002040	0	0	0	0	0	0	0	0	0	0	0	0	0	0	2	0
HORVU1Hr1G002060	0	0	1	2	4	0	1	0	29	8	4	18	33	5	30	20
HORVU1Hr1G002090	6	33	11	2	35	2	0	23	0	0	0	294	1	0	0	0
HORVU1Hr1G002100	16	41	71	27	16	4	18	15	4	2	17	114	24	39	12	77
HORVU1Hr1G002110	0	2	1	1	6	3	1	9	0	0	0	0	1	1	0	3
HORVU1Hr1G002150	6280	9966	9631	7856	4871	4856	1597	3407	3620	2196	2342	4039	3288	2502	2246	3510
HORVU1Hr1G002160	0	7	7	2	7	1	7	1	223	239	345	284	244	250	440	239
HORVU1Hr1G002170	0	0	2	1	0	1	0	1	2	1	0	1	0	1	0	1
HORVU1Hr1G002210	0	0	0	0	0	2	0	2	0	0	0	1	1	1	0	0
HORVU1Hr1G002220	0	0	0	0	0	0	0	0	0	0	0	0	0	0	0	0
HORVU1Hr1G002240	405	433	517	570	439	369	315	317	506	408	370	417	351	372	270	468
HORVU1Hr1G002260	271	223	204	171	106	150	125	86	107	158	133	142	106	104	57	116
HORVU1Hr1G002290	1	1	3	1	1	1	1	1	0	1	1	1	1	0	1	2
HORVU1Hr1G002300	22	15	24	12	11	14	8	9	81	44	45	42	17	25	17	13
HORVU1Hr1G002310	329	238	282	293	186	204	289	185	265	283	256	320	229	248	182	298
HORVU1Hr1G002320	300	220	194	165	108	139	107	75	119	160	126	131	102	122	55	111
HORVU1Hr1G002340	516	633	1226	1298	1104	846	315	487	1025	620	545	944	649	602	493	693
HORVU1Hr1G002390	797	980	1376	1440	959	835	412	691	1197	788	671	1027	920	728	630	1095
HORVU1Hr1G002400	1	0	0	0	0	1	0	0	0	0	0	0	0	0	0	0
HORVU1Hr1G002410	0	0	0	1	4	1	6	5	3	5	0	1	3	1	2	12
HORVU1Hr1G002420	8	10	9	14	11	7	1	0	9	10	3	6	8	1	7	2
HORVU1Hr1G002430	0	0	0	0	0	0	0	0	0	0	0	0	0	0	0	0
HORVU1Hr1G002440	0	0	0	0	1	0	0	0	0	0	0	0	0	0	0	0
HORVU1Hr1G002450	0	0	0	0	0	0	0	0	0	0	0	0	0	0	0	0
HORVU1Hr1G002460	1974	2150	2210	2529	1567	2326	505	1465	2087	1030	787	1584	1210	1011	1025	929
HORVU1Hr1G002470	8998	9177	10181	8897	5613	6165	3492	4619	10429	6452	5431	7823	6123	5539	5029	6982
HORVU1Hr1G002480	0	0	0	0	0	0	0	0	0	0	0	0	0	0	0	0
HORVU1Hr1G002500	4221	3845	4563	3693	2640	2750	1833	2086	3711	2228	2228	2553	2348	1976	1268	2586
HORVU1Hr1G002510	503	553	784	767	690	510	405	395	843	695	494	590	575	670	407	755
HORVU1Hr1G002540	0	0	0	0	1	0	0	0	0	0	0	0	0	0	0	0
HORVU1Hr1G002560	0	0	0	0	0	0	0	0	0	0	0	0	0	0	0	0
HORVU1Hr1G002590	1144	1520	1444	1196	871	904	482	754	1224	737	645	1104	772	718	714	922
HORVU1Hr1G002600	2013	2335	2404	2080	1362	1501	664	1214	2219	1290	1125	1805	1334	1185	1303	1519
HORVU1Hr1G002620	304	294	426	503	328	356	70	273	411	222	192	232	250	221	223	279
HORVU1Hr1G002640	0	0	1	0	0	2	0	0	0	0	0	0	0	1	1	0
HORVU1Hr1G002660	1	0	0	0	0	1	0	0	0	0	2	0	0	0	0	0
HORVU1Hr1G002670	0	0	0	0	1	0	0	0	0	0	0	0	0	0	0	0
HORVU1Hr1G002680	1	0	0	0	1	2	4	0	0	0	3	4	0	0	0	0
HORVU1Hr1G002690	0	0	0	1	0	1	0	0	1	0	0	4	0	0	0	1
HORVU1Hr1G002710	3	7	20	17	249	18	24	67	1	3	23	7	192	99	15	305
HORVU1Hr1G002730	0	0	0	0	0	0	0	0	0	1	0	0	0	1	0	1
HORVU1Hr1G002740	98	212	268	388	401	258	162	149	353	215	272	438	652	561	245	1111
HORVU1Hr1G002750	0	0	0	0	0	0	0	0	1	0	0	0	0	0	0	0
HORVU1Hr1G002760	0	0	0	0	0	0	0	0	0	0	0	0	0	0	0	0
HORVU1Hr1G002770	0	0	0	0	0	0	0	0	0	0	0	0	0	0	0	0
HORVU1Hr1G002790	0	1	0	0	0	0	0	0	0	0	0	1	0	0	0	0
HORVU1Hr1G002810	1	5	4	15	2	5	3	4	9	2	6	6	3	6	3	9
HORVU1Hr1G002820	1	2	3	3	3	2	0	0	2	0	4	6	8	0	0	7
HORVU1Hr1G002830	305	297	402	449	316	303	300	236	443	347	346	466	346	318	242	449
HORVU1Hr1G002840	4382	4801	5607	5649	4507	4505	3721	3735	6721	6018	5687	6291	6986	5384	4213	6246
HORVU1Hr1G002850	107	163	161	128	106	127	92	73	121	66	72	87	94	81	66	80
HORVU1Hr1G002860	86	128	123	79	77	100	77	51	77	37	46	48	54	41	44	25
HORVU1Hr1G002890	1727	2111	2103	1222	1366	1383	1027	952	1317	923	871	714	864	637	566	630
HORVU1Hr1G002900	39	79	49	8	6	12	1	8	7	1	1	2	0	2	2	0
HORVU1Hr1G002910	1	5	4	15	2	5	3	4	9	2	6	6	3	6	3	9
HORVU1Hr1G002920	0	6	3	3	10	6	1	0	8	12	7	21	12	7	11	13
HORVU1Hr1G002930	4	2	6	9	4	3	4	2	12	9	3	11	6	5	1	5
HORVU1Hr1G002950	0	0	0	2	0	0	0	0	0	0	0	1	1	0	1	0
HORVU1Hr1G002960	622	1073	781	460	246	150	127	173	442	350	398	601	352	270	245	496
HORVU1Hr1G002970	184	181	275	207	157	152	161	137	275	230	223	237	257	283	145	487
HORVU1Hr1G002990	0	0	1	1	5	0	0	0	1	0	0	1	64	54	0	154
HORVU1Hr1G003010	5	17	9	22	25	15	0	2	30	29	23	44	28	42	28	38
HORVU1Hr1G003020	101	96	128	79	68	93	107	97	133	133	124	97	77	103	64	133
HORVU1Hr1G003030	95	89	123	76	66	87	99	95	125	130	122	89	76	100	64	126
HORVU1Hr1G003040	0	0	0	0	0	0	0	0	0	0	0	0	0	0	0	0
HORVU1Hr1G003050	25	27	40	39	16	9	13	10	42	27	25	41	27	29	18	29
HORVU1Hr1G003060	8	12	11	8	16	9	24	15	28	42	40	21	29	33	15	47
HORVU1Hr1G003070	4	4	3	6	11	12	7	11	7	29	8	19	12	14	5	9
HORVU1Hr1G003080	22	31	24	41	56	60	39	33	79	106	70	66	56	62	36	85
HORVU1Hr1G003100	0	0	0	0	6	0	0	0	1	1	2	3	38	11	0	87
HORVU1Hr1G003130	79	72	71	85	59	56	33	49	130	90	108	130	117	108	83	151
HORVU1Hr1G003140	1	2	3	2	8	2	0	0	1	0	2	4	67	36	0	139
HORVU1Hr1G003150	410	408	325	148	76	47	87	56	177	201	167	233	110	126	101	179
HORVU1Hr1G003160	377	330	380	298	214	234	157	191	280	249	206	224	224	293	159	267
HORVU1Hr1G003170	1448	1487	1793	1854	1329	1324	1196	1262	1538	1310	1182	1536	1468	1512	1020	1923
HORVU1Hr1G003200	0	0	0	0	5	0	0	0	0	0	0	0	1	0	0	0
HORVU1Hr1G003210	0	3	0	0	12	0	0	1	0	0	0	0	0	0	0	1
HORVU1Hr1G003230	3	9	7	4	12	6	0	4	7	7	3	10	13	3	6	5
HORVU1Hr1G003250	0	0	1	0	0	0	0	0	0	0	0	1	1	0	0	0
HORVU1Hr1G003260	26	66	186	116	126	60	16	35	74	43	58	124	78	46	64	103
HORVU1Hr1G003270	531	524	654	637	432	399	342	331	498	337	368	667	357	362	255	509
HORVU1Hr1G003280	11	43	40	56	43	29	13	14	32	49	45	114	73	44	40	76
HORVU1Hr1G003290	0	0	0	0	0	0	0	0	0	0	0	0	1	0	0	0
HORVU1Hr1G003300	892	1417	2001	2338	2485	1455	764	1405	1922	1267	1534	2424	4806	2665	1518	6150
HORVU1Hr1G003320	27	33	34	27	21	22	12	20	25	21	24	30	13	29	19	14
HORVU1Hr1G003330	1	1	2	0	0	1	0	0	2	0	0	0	1	0	0	0
HORVU1Hr1G003340	24	50	52	52	47	28	29	21	40	36	39	32	32	25	27	45
HORVU1Hr1G003360	0	0	0	0	0	0	0	0	0	0	0	0	0	0	0	0
HORVU1Hr1G003370	0	0	0	0	0	0	0	0	0	0	0	0	0	0	0	1
HORVU1Hr1G003430	0	0	0	0	0	0	0	0	0	0	0	0	0	0	0	0
HORVU1Hr1G003460	471	435	665	540	435	421	419	322	436	371	406	433	400	402	310	472
HORVU1Hr1G003490	8	25	18	20	12	19	2	12	5	10	2	4	5	0	3	3
HORVU1Hr1G003510	601	654	922	863	533	517	783	476	710	573	519	667	396	418	314	578
HORVU1Hr1G003520	795	867	1369	1255	724	650	1285	537	1036	762	548	947	509	545	426	733
HORVU1Hr1G003530	945	1162	1510	1419	849	966	799	996	1003	776	846	1178	1060	970	753	1406
HORVU1Hr1G003540	475	469	625	617	349	353	372	412	471	373	349	506	454	397	350	597
HORVU1Hr1G003560	0	0	0	0	0	0	0	0	0	0	0	0	0	0	0	0
HORVU1Hr1G003580	0	0	0	0	0	0	0	0	0	0	0	0	0	0	0	0
HORVU1Hr1G003590	1018	1071	1145	1106	558	676	545	418	827	910	712	985	578	595	484	600
HORVU1Hr1G003620	2155	2513	3262	1538	1709	2829	5969	3802	2978	3783	3220	2360	1645	2480	1103	3355
HORVU1Hr1G003630	17	30	89	62	51	40	14	16	66	20	35	67	32	21	39	49
HORVU1Hr1G003650	0	0	0	0	0	0	0	1	0	0	0	0	0	0	0	0
HORVU1Hr1G003700	313	289	342	354	163	248	73	231	403	224	167	205	309	214	328	218
HORVU1Hr1G003710	6	8	7	13	12	8	4	2	6	10	9	13	9	9	6	10
HORVU1Hr1G003720	74	69	90	57	90	62	27	35	254	221	119	105	57	101	83	78
HORVU1Hr1G003740	133	142	212	265	175	186	95	112	141	147	148	135	98	112	60	102
HORVU1Hr1G003750	220	291	471	471	423	340	201	161	371	234	243	379	304	279	243	403
HORVU1Hr1G003780	0	0	0	1	1	0	0	0	0	0	0	0	0	0	0	0
HORVU1Hr1G003810	10	6	4	8	19	8	11	5	12	10	8	5	13	20	6	19
HORVU1Hr1G003840	15	5	8	11	19	12	17	6	19	9	7	9	7	8	5	13
HORVU1Hr1G003850	2	5	2	4	2	2	1	0	0	1	0	5	2	0	1	2
HORVU1Hr1G003870	4	3	7	18	7	4	10	6	5	3	9	7	10	2	5	10
HORVU1Hr1G003890	20	46	25	22	8	15	6	12	39	28	36	36	25	24	28	27
HORVU1Hr1G003910	4	4	20	17	11	9	3	7	18	15	18	23	14	25	11	26
HORVU1Hr1G003940	206	237	298	226	236	181	124	111	324	249	259	292	1467	1399	151	2962
HORVU1Hr1G003960	45	67	133	199	107	115	17	50	73	32	30	95	115	68	70	56
HORVU1Hr1G003990	18	36	51	41	25	18	16	8	45	46	38	48	39	26	18	35
HORVU1Hr1G004000	0	0	0	1	0	0	0	0	0	0	0	1	0	0	0	0
HORVU1Hr1G004020	4	1	2	2	2	5	0	2	1	3	0	4	2	1	2	4
HORVU1Hr1G004030	0	0	0	0	0	0	0	0	0	0	0	0	0	0	0	0
HORVU1Hr1G004040	52	64	140	58	47	63	24	52	54	31	25	31	65	35	38	30
HORVU1Hr1G004050	0	0	0	0	0	0	0	0	0	0	0	0	0	0	0	0
HORVU1Hr1G004060	0	0	0	0	0	0	0	0	0	0	0	0	0	0	0	0
HORVU1Hr1G004080	243	261	566	336	271	260	90	158	235	105	106	228	285	163	192	185
HORVU1Hr1G004120	0	0	0	0	0	0	0	0	0	0	0	0	0	0	0	0
HORVU1Hr1G004130	0	0	0	0	0	0	1	0	4	6	2	2	2	2	4	1
HORVU1Hr1G004140	6	7	24	13	6	6	2	8	9	3	3	5	10	10	7	3
HORVU1Hr1G004150	174	191	499	221	0	3	0	5	0	0	0	2009	960	19	0	12
HORVU1Hr1G004200	69	122	100	95	82	66	42	30	113	116	122	248	107	82	59	86
HORVU1Hr1G004230	1503	2050	1610	1330	1084	1188	1019	1617	514	369	643	967	1261	752	840	1156
HORVU1Hr1G004290	0	0	0	0	0	0	0	0	0	0	0	0	0	0	0	0
HORVU1Hr1G004330	1019	842	950	1387	1193	1247	1183	1501	2967	1389	1040	905	2620	3926	2218	4556
HORVU1Hr1G004400	6159	5850	5925	7947	5214	6443	12543	8330	5949	4766	6044	6559	3508	4671	4160	3219
HORVU1Hr1G004410	0	0	0	0	0	0	0	0	0	0	0	0	0	0	0	0
HORVU1Hr1G004430	1896	2659	3026	2309	1247	1741	1566	1718	1202	778	1021	1306	1599	1223	790	2283
HORVU1Hr1G004440	641	926	1031	715	416	524	491	495	451	265	312	426	510	376	248	688
HORVU1Hr1G004480	355	325	321	362	335	311	293	227	435	367	327	327	352	397	256	482
HORVU1Hr1G004490	826	884	794	772	587	549	456	336	849	647	595	722	705	703	373	948
HORVU1Hr1G004510	334	331	466	501	320	343	234	248	605	534	480	730	464	380	327	524
HORVU1Hr1G004520	63	108	191	215	175	124	93	97	172	113	140	223	162	137	114	215
HORVU1Hr1G004530	16	37	58	54	53	48	27	48	61	28	45	87	32	47	51	62
HORVU1Hr1G004560	4	1	0	0	0	2	2	1	4	1	1	0	0	3	0	7
HORVU1Hr1G004580	0	0	0	1	484	7	67	69	0	0	5	0	130	647	1	663
HORVU1Hr1G004590	681	869	1053	995	1022	620	702	538	844	860	680	854	577	527	433	657
HORVU1Hr1G004610	667	526	716	563	628	421	525	371	603	718	642	501	352	354	245	371
HORVU1Hr1G004650	2472	2341	2726	3001	3490	2797	2085	2485	3307	3051	2421	3548	1950	1648	1794	999
HORVU1Hr1G004660	1	1	0	0	0	1	0	0	0	0	2	0	0	0	0	0
HORVU1Hr1G004670	0	0	0	0	191	0	14	26	0	0	0	0	44	243	0	216
HORVU1Hr1G004690	409	544	605	598	633	409	441	358	500	578	423	512	354	310	285	399
HORVU1Hr1G004700	409	544	605	598	633	409	441	358	500	578	423	512	354	310	285	399
HORVU1Hr1G004720	67	122	99	130	35	36	400	41	95	132	117	170	25	122	104	51
HORVU1Hr1G004750	35	63	92	83	42	47	9	25	38	35	18	67	62	27	17	47
HORVU1Hr1G004790	0	1	0	0	1	0	1	0	1	3	0	3	1	7	0	5
HORVU1Hr1G004800	0	0	0	0	0	0	0	0	0	0	1	0	0	0	0	0
HORVU1Hr1G004820	0	0	0	0	0	0	3	0	0	0	0	0	0	0	0	0
HORVU1Hr1G004830	0	0	0	0	0	0	0	0	0	0	1	0	0	0	0	0
HORVU1Hr1G004840	0	0	0	0	0	0	0	0	0	0	1	0	0	0	0	0
HORVU1Hr1G004860	2	14	17	18	17	20	2	6	8	6	12	17	14	16	6	12
HORVU1Hr1G004870	0	0	0	0	0	0	0	0	0	0	0	0	0	0	0	0
HORVU1Hr1G004880	0	0	0	0	0	0	0	0	0	0	0	1	0	0	0	0
HORVU1Hr1G004890	0	1	3	1	3	0	0	0	2	0	2	1	2	0	2	2
HORVU1Hr1G004910	65	74	130	215	164	86	40	84	153	141	157	199	120	93	108	116
HORVU1Hr1G004920	9	12	11	22	6	11	6	5	32	14	28	15	16	15	12	11
HORVU1Hr1G004930	0	1	2	2	0	0	0	0	0	1	2	1	1	2	1	2
HORVU1Hr1G004960	567	578	931	959	640	650	438	523	743	505	506	684	493	564	400	667
HORVU1Hr1G004970	996	936	916	1015	903	784	737	764	1129	1224	1089	1203	995	897	624	1252
HORVU1Hr1G004980	404	563	284	510	245	1179	241	807	357	190	252	196	826	1103	586	1550
HORVU1Hr1G005020	0	0	0	0	0	0	0	0	0	0	0	0	0	0	0	0
HORVU1Hr1G005030	0	0	0	0	0	0	0	0	0	0	0	0	0	0	0	0
HORVU1Hr1G005070	0	0	0	0	0	0	0	0	0	0	0	0	0	0	0	0
HORVU1Hr1G005090	10	14	7	6	3	7	2	0	14	11	11	6	5	3	3	2
HORVU1Hr1G005100	4	1	2	3	1521	1	11	2	57	182	844	179	4244	216	224	458
HORVU1Hr1G005110	4	1	2	3	1521	1	11	2	57	182	844	179	4244	216	224	458
HORVU1Hr1G005120	1438	1188	1791	1448	1449	1038	1931	1895	1096	957	1242	1102	2067	1623	705	3638
HORVU1Hr1G005130	0	0	0	0	0	0	0	0	0	0	0	0	0	0	0	0
HORVU1Hr1G005140	352	376	528	601	392	282	285	281	547	371	384	601	403	433	334	588
HORVU1Hr1G005150	0	1	0	0	0	0	0	0	0	0	0	0	0	0	0	0
HORVU1Hr1G005170	32	35	40	50	37	29	6	28	73	28	51	52	56	62	26	64
HORVU1Hr1G005180	124	196	174	154	106	72	18	44	331	145	173	177	241	148	174	240
HORVU1Hr1G005200	17	20	17	20	10	16	13	11	18	18	18	11	10	9	2	15
HORVU1Hr1G005230	9	23	10	7	69	7	2	8	43	38	33	27	81	51	56	71
HORVU1Hr1G005260	1287	1422	1504	1522	1340	1007	823	604	1660	1649	1463	1277	1337	1339	716	1716
HORVU1Hr1G005270	0	1	1	0	0	0	0	0	0	0	0	0	0	0	0	0
HORVU1Hr1G005280	82	96	150	97	66	69	71	64	86	96	135	151	92	96	77	126
HORVU1Hr1G005290	144	172	93	39	52	59	56	42	54	28	27	30	39	25	18	33
HORVU1Hr1G005350	29	40	40	33	33	22	6	36	26	22	30	33	32	40	19	45
HORVU1Hr1G005360	87	225	157	79	2	10	0	8	0	1	0	0	0	0	0	0
HORVU1Hr1G005370	98	140	163	114	42	59	24	39	88	82	70	75	37	55	42	53
HORVU1Hr1G005390	92	166	147	149	83	51	75	71	66	113	155	141	73	77	47	106
HORVU1Hr1G005410	0	0	0	0	1	0	0	0	0	0	0	0	0	0	0	0
HORVU1Hr1G005420	0	0	0	0	0	0	0	0	0	0	0	0	0	0	1	0
HORVU1Hr1G005430	0	0	0	0	0	0	0	0	0	0	0	0	0	0	0	0
HORVU1Hr1G005450	162	208	233	206	138	141	118	111	204	133	151	194	115	121	102	152
HORVU1Hr1G005460	0	0	0	0	0	0	6	0	0	0	0	0	0	0	0	0
HORVU1Hr1G005470	1641	1872	2342	1568	937	835	1232	760	1263	1168	1240	1387	1186	1022	684	1628
HORVU1Hr1G005500	1418	1465	2096	1312	728	649	1050	645	930	949	977	1131	994	831	549	1400
HORVU1Hr1G005510	39	242	15	8	3	6	0	1	17	6	1	7	17	11	13	17
HORVU1Hr1G005520	218	244	325	312	147	199	52	119	171	75	41	70	211	86	101	62
HORVU1Hr1G005530	0	0	2	0	0	0	0	0	0	0	0	0	0	1	0	3
HORVU1Hr1G005550	0	0	0	0	0	0	0	0	0	0	0	0	0	0	0	0
HORVU1Hr1G005600	2376	2148	2196	2857	3265	3527	4361	4431	4674	3619	2988	3565	3078	3460	3495	2847
HORVU1Hr1G005630	0	2	1	1	0	0	0	1	0	0	2	0	0	0	1	0
HORVU1Hr1G005680	38	39	44	26	67	26	44	49	84	73	60	78	74	89	72	132
HORVU1Hr1G005690	0	0	0	0	0	0	0	0	0	0	0	0	0	0	0	0
HORVU1Hr1G005700	0	1	0	0	0	0	0	0	0	0	1	0	12	2	0	12
HORVU1Hr1G005710	242	310	575	581	518	410	140	243	494	296	320	555	539	307	311	608
HORVU1Hr1G005720	38	65	188	150	121	90	46	53	146	62	94	164	134	85	85	167
HORVU1Hr1G005730	2	1	2	5	57	10	16	5	8	6	10	19	82	52	5	112
HORVU1Hr1G005750	0	0	0	0	0	0	0	0	0	0	0	0	0	1	0	0
HORVU1Hr1G005760	3	1	0	5	2	1	1	1	1	0	10	6	210	41	2	47
HORVU1Hr1G005790	670	560	665	638	521	535	490	408	654	601	486	605	492	539	364	561
HORVU1Hr1G005800	470	476	496	634	472	494	412	424	733	514	709	771	460	628	313	495
HORVU1Hr1G005830	0	0	0	1	0	0	2	0	0	1	1	1	1	0	0	0
HORVU1Hr1G005870	36	56	31	37	3	10	11	15	6	10	16	13	10	13	3	9
HORVU1Hr1G005910	0	0	0	0	0	0	0	0	0	0	0	0	0	0	0	0
HORVU1Hr1G005920	5	4	17	4	198	2	22	82	0	1	47	6	770	190	3	435
HORVU1Hr1G005980	222	357	538	432	249	245	113	118	468	346	328	733	510	482	242	563
HORVU1Hr1G005990	0	1	0	0	0	0	0	0	0	0	0	0	0	0	0	0
HORVU1Hr1G006020	2721	3874	5977	5606	5361	2962	2699	2572	5884	3576	4320	6157	6619	4631	2711	11165
HORVU1Hr1G006130	0	0	0	1	0	0	0	0	0	0	0	0	0	0	0	0
HORVU1Hr1G006230	0	1	4	6	13	3	0	3	6	4	7	18	12	7	2	12
HORVU1Hr1G006240	0	0	0	2	0	0	0	0	0	0	0	0	0	0	0	0
HORVU1Hr1G006290	39	65	63	72	89	63	24	26	82	88	77	104	60	80	59	89
HORVU1Hr1G006350	0	0	0	0	0	0	0	0	0	0	0	0	0	0	0	0
HORVU1Hr1G006590	0	0	0	0	0	0	0	0	0	0	0	1	0	0	0	0
HORVU1Hr1G006750	24	27	40	55	45	27	10	24	39	38	28	32	28	13	14	40
HORVU1Hr1G006770	629	825	1211	1338	1105	824	383	621	1026	642	671	1070	944	814	624	1142
HORVU1Hr1G006780	4	5	2	0	0	1	0	0	0	0	1	1	0	0	0	0
HORVU1Hr1G006850	0	0	0	0	0	0	0	0	0	0	0	0	0	0	0	0
HORVU1Hr1G006860	3929	5026	6582	6534	4462	3972	3511	4587	3349	2633	3460	4786	3962	3291	2766	4326
HORVU1Hr1G006880	453	484	590	512	380	405	340	336	521	464	417	520	394	402	239	540
HORVU1Hr1G006890	282	372	438	405	276	302	264	243	438	418	332	503	315	327	218	398
HORVU1Hr1G006910	0	3	0	0	0	0	0	0	1	1	4	6	0	1	0	0
HORVU1Hr1G006920	0	0	0	0	0	0	0	1	2	1	0	0	0	0	1	0
HORVU1Hr1G006930	20	24	27	22	18	34	27	21	30	15	21	45	41	27	12	27
HORVU1Hr1G006940	218	246	377	402	408	317	272	221	424	385	386	482	278	338	266	337
HORVU1Hr1G006950	714	1222	2146	3283	3589	2692	453	1018	3018	1437	1240	2102	1594	1050	1143	1032
HORVU1Hr1G006970	2	0	0	0	0	0	0	0	0	0	0	0	0	0	0	0
HORVU1Hr1G006980	0	0	0	0	0	0	0	0	0	0	0	0	0	0	0	0
HORVU1Hr1G007010	184	253	229	128	58	106	10	25	72	47	63	41	98	64	12	102
HORVU1Hr1G007040	0	0	0	0	0	0	0	0	0	0	2	0	0	0	0	0
HORVU1Hr1G007100	0	1	0	0	0	0	0	0	0	0	0	0	1	0	0	0
HORVU1Hr1G007150	0	0	0	0	0	0	0	0	0	0	0	0	0	0	0	0
HORVU1Hr1G007290	0	1	1	0	1	2	0	0	0	0	0	0	1	1	0	1
HORVU1Hr1G007300	13	15	4	17	7	18	4	16	13	13	21	13	19	14	10	6
HORVU1Hr1G007310	3311	3471	5522	4217	2264	3165	804	2667	2701	2038	1810	2248	4011	2142	2417	3463
HORVU1Hr1G007320	0	0	2	2	1	0	0	2	2	0	1	3	0	1	0	4
HORVU1Hr1G007360	116	107	115	149	91	98	69	75	161	146	107	104	61	105	69	95
HORVU1Hr1G007400	0	1	0	0	0	0	0	0	12	14	5	2	2	1	0	1
HORVU1Hr1G007420	0	0	0	0	1	1	0	1	1	2	3	1	3	3	1	5
HORVU1Hr1G007440	0	0	0	3	1	0	0	0	1	2	1	4	4	2	4	3
HORVU1Hr1G007460	0	0	1	0	0	0	0	0	1	0	0	0	0	0	0	0
HORVU1Hr1G007480	115	98	52	30	24	10	2	21	44	20	14	78	12	28	21	28
HORVU1Hr1G007530	3	13	29	25	20	14	3	7	13	6	13	18	31	10	22	25
HORVU1Hr1G007540	0	2	3	3	1	2	0	0	1	0	0	1	1	1	2	0
HORVU1Hr1G007580	1662	2031	2505	2861	2310	2036	1144	1560	2337	1686	1642	2464	1830	1806	1435	2090
HORVU1Hr1G007600	1044	1159	1356	1445	1119	991	646	639	1283	1047	953	1179	1050	892	677	1128
HORVU1Hr1G007630	1112	1702	2069	1689	1627	2130	2835	2444	1719	1410	1120	1898	1123	1328	1235	741
HORVU1Hr1G007640	1225	1860	2223	1804	1745	2232	2943	2529	1899	1623	1291	2150	1315	1512	1357	994
HORVU1Hr1G007660	0	0	0	0	0	0	0	0	0	0	0	0	0	0	0	0
HORVU1Hr1G007720	33	44	39	52	21	19	24	24	42	40	17	26	23	35	7	20
HORVU1Hr1G007730	221	245	313	328	293	257	168	151	393	274	271	328	237	267	183	283
HORVU1Hr1G007790	41	15	2	9	3	7	24	9	34	32	2	17	14	22	4	23
HORVU1Hr1G007800	43	19	5	17	26	8	26	3	82	85	27	46	14	24	6	13
HORVU1Hr1G007810	3911	4594	4127	4774	1736	1830	1261	1319	2590	2215	1326	1731	1043	1025	995	826
HORVU1Hr1G007830	12	23	14	20	163	6	2	4	17	18	14	66	228	443	18	506
HORVU1Hr1G007840	0	2	0	2	35	11	76	30	5	3	14	26	109	48	32	131
HORVU1Hr1G007850	5	5	6	4	5	7	1	4	3	5	4	3	13	4	4	11
HORVU1Hr1G007860	0	0	1	1	1	0	0	0	0	1	0	0	1	1	2	0
HORVU1Hr1G007870	15	8	21	12	10	5	3	8	7	23	19	10	3	11	7	12
HORVU1Hr1G007880	18	13	7	20	13	34	6	22	18	12	7	15	23	14	11	21
HORVU1Hr1G007890	15	8	21	12	10	5	3	8	7	23	19	10	3	11	7	12
HORVU1Hr1G007900	0	0	1	0	0	0	0	0	0	0	0	0	0	0	0	0
HORVU1Hr1G007910	2	3	6	5	4	2	0	2	2	3	3	6	3	1	3	6
HORVU1Hr1G007930	0	2	1	0	0	0	0	1	2	0	0	0	1	2	0	2
HORVU1Hr1G007950	0	1	0	0	0	0	0	0	0	0	1	0	0	1	0	0
HORVU1Hr1G008110	3	4	1	2	3	3	0	1	7	4	3	3	7	12	6	13
HORVU1Hr1G008120	6711	7286	7781	6413	4461	4159	3755	3262	4976	7371	5851	6000	3202	3448	2660	3588
HORVU1Hr1G008130	2054	2144	2053	1659	1235	1003	1213	915	1636	2205	2619	2522	1575	1537	1072	1865
HORVU1Hr1G008140	0	0	0	0	0	0	0	0	0	0	0	0	0	0	0	0
HORVU1Hr1G008150	3	4	1	2	3	3	0	1	7	4	3	3	7	12	6	13
HORVU1Hr1G008160	138	145	163	137	103	100	92	71	110	79	74	117	85	88	66	102
HORVU1Hr1G008170	3	2	6	3	2	4	7	0	6	3	1	4	2	3	5	9
HORVU1Hr1G008230	1257	1757	2192	1982	1418	1226	501	646	1531	968	738	915	1196	704	567	934
HORVU1Hr1G008250	1340	1506	1907	2072	1644	1492	901	1003	1601	975	1048	1362	1536	1288	869	1882
HORVU1Hr1G008270	0	0	1	0	0	0	0	0	0	0	0	0	0	0	0	0
HORVU1Hr1G008290	0	0	0	0	0	0	0	0	1	0	0	0	0	0	0	1
HORVU1Hr1G008300	0	0	1	0	0	0	0	0	0	0	0	1	0	1	0	10
HORVU1Hr1G008330	2138	2626	3479	3266	2501	2113	1326	1681	2566	2019	1963	2230	2335	2050	1543	3057
HORVU1Hr1G008340	0	0	0	0	1	2	0	0	0	1	2	0	1	1	1	0
HORVU1Hr1G008350	165	236	292	279	316	251	198	168	321	155	228	285	229	211	170	249
HORVU1Hr1G008360	11	64	2	0	1	0	0	1	0	0	1	0	0	0	0	0
HORVU1Hr1G008370	6	2	12	3	6	4	2	1	1	3	6	9	4	8	5	13
HORVU1Hr1G008380	0	0	2	2	0	0	0	0	0	2	1	1	2	0	0	1
HORVU1Hr1G008420	0	2	1	0	0	0	0	0	0	0	0	0	1	0	0	0
HORVU1Hr1G008430	26	29	50	37	29	30	26	30	39	26	24	28	25	30	30	23
HORVU1Hr1G008440	95	89	77	83	51	64	80	51	76	68	55	86	56	68	39	90
HORVU1Hr1G008480	0	1	0	0	0	0	0	0	0	0	0	0	1	0	0	0
HORVU1Hr1G008490	0	0	2	2	1	1	2	0	4	3	1	3	1	0	0	2
HORVU1Hr1G008500	14	5	5	4	3	5	4	0	6	9	4	5	3	4	3	3
HORVU1Hr1G008510	0	0	0	0	0	0	0	0	0	0	0	0	0	0	0	0
HORVU1Hr1G008520	0	2	5	4	0	2	0	1	0	2	6	1	1	1	1	1
HORVU1Hr1G008530	1063	1096	1275	1203	932	896	748	694	982	970	771	894	894	968	560	1308
HORVU1Hr1G008540	0	0	0	1	0	1	0	0	0	0	0	0	0	0	0	0
HORVU1Hr1G008560	247	264	506	631	525	309	207	240	568	341	355	640	442	394	290	614
HORVU1Hr1G008580	4	5	8	6	11	8	2	9	1	1	5	3	10	4	4	3
HORVU1Hr1G008620	3032	3419	4091	4836	3122	3043	2670	2263	3487	2582	2590	3543	2724	2692	1937	3178
HORVU1Hr1G008650	0	0	0	0	0	0	0	0	0	0	0	0	0	0	0	0
HORVU1Hr1G008670	4	1	7	7	0	1	6	2	9	4	5	4	1	6	3	4
HORVU1Hr1G008690	24	17	22	24	26	27	10	8	15	21	7	7	20	8	5	22
HORVU1Hr1G008810	2202	1581	2077	2050	3593	3294	2021	1644	3883	4898	3118	1967	1236	1693	1674	796
HORVU1Hr1G008830	128	525	1040	695	29	20	7	90	1131	720	511	1127	41	27	36	88
HORVU1Hr1G008840	128	525	1040	693	29	20	7	90	1131	720	511	1127	41	27	36	88
HORVU1Hr1G008900	36	69	116	69	35	43	21	38	77	59	31	48	21	11	5	17
HORVU1Hr1G008930	0	0	0	0	0	0	0	0	0	0	0	0	0	0	0	0
HORVU1Hr1G008940	8	16	6	13	10	4	0	0	1	3	0	3	5	1	0	2
HORVU1Hr1G008970	0	0	0	0	0	0	0	0	0	0	0	0	0	0	0	0
HORVU1Hr1G009000	0	0	0	0	0	0	0	0	0	0	0	0	1	2	0	0
HORVU1Hr1G009010	0	0	0	0	0	0	0	0	0	0	0	0	0	0	0	0
HORVU1Hr1G009030	78	129	148	96	119	93	66	63	65	32	42	57	81	51	46	55
HORVU1Hr1G009040	2	17	71	22	3	5	1	2	32	15	41	29	1	3	5	9
HORVU1Hr1G009050	126	96	125	146	276	111	380	384	278	574	331	688	511	414	428	386
HORVU1Hr1G009060	0	0	0	0	0	0	0	0	2	1	0	0	1	0	0	0
HORVU1Hr1G009070	96	129	120	21	24	23	6	1	270	171	36	66	60	46	98	39
HORVU1Hr1G009080	4	7	22	2	10	1	0	0	40	21	8	12	17	2	14	15
HORVU1Hr1G009090	0	0	0	0	0	0	2	0	0	0	0	0	0	0	0	0
HORVU1Hr1G009100	61	85	105	144	156	70	100	131	277	219	241	387	289	254	153	494
HORVU1Hr1G009110	39	24	5	3	20	11	6	7	50	90	21	28	21	21	16	29
HORVU1Hr1G009140	4	4	0	1	1	3	0	0	0	0	2	1	2	0	0	1
HORVU1Hr1G009160	2	4	1	8	2	3	0	1	0	2	1	1	3	0	0	3
HORVU1Hr1G009170	16	49	49	21	30	10	0	7	15	10	8	21	36	13	24	31
HORVU1Hr1G009180	47	45	20	5	3	0	1	3	17	13	4	17	13	3	10	14
HORVU1Hr1G009200	25	19	34	13	32	29	12	13	22	31	45	42	34	42	22	68
HORVU1Hr1G009230	0	0	2	0	0	0	0	0	0	0	1	1	1	0	0	1
HORVU1Hr1G009250	558	834	592	199	175	89	58	61	260	145	115	293	288	162	166	282
HORVU1Hr1G009290	0	0	1	0	0	0	0	0	0	0	0	0	0	0	0	0
HORVU1Hr1G009300	6	6	9	9	0	0	4	4	10	5	7	27	3	5	3	21
HORVU1Hr1G009310	3	1	3	2	3	3	5	0	4	3	0	2	5	1	2	2
HORVU1Hr1G009320	0	0	1	0	0	0	0	0	0	0	0	1	0	0	0	0
HORVU1Hr1G009330	0	0	3	0	1	2	0	1	0	2	1	1	0	0	1	0
HORVU1Hr1G009350	4	3	8	1	2	4	0	1	3	1	3	6	2	3	1	11
HORVU1Hr1G009360	45	50	86	34	26	29	46	26	49	66	83	55	40	64	26	96
HORVU1Hr1G009370	0	0	1	0	0	0	0	0	0	0	0	0	0	0	0	0
HORVU1Hr1G009380	3	2	5	2	0	0	2	4	2	0	1	8	2	3	0	11
HORVU1Hr1G009390	189	300	362	261	199	303	204	232	95	113	142	138	277	193	98	316
HORVU1Hr1G009430	195	273	348	306	318	261	195	183	320	238	226	335	285	231	187	379
HORVU1Hr1G009460	7	7	6	5	4	4	0	3	19	10	6	7	6	9	6	9
HORVU1Hr1G009490	95	552	3	1	15	1	4	0	0	1	3	0	88	14	0	12
HORVU1Hr1G009520	0	0	0	0	0	0	0	0	0	0	0	0	0	0	0	0
HORVU1Hr1G009530	0	0	0	0	0	0	0	0	0	0	0	0	0	0	0	0
HORVU1Hr1G009550	44	31	26	13	6	6	15	4	12	13	11	5	12	8	3	10
HORVU1Hr1G009560	6	28	40	41	65	22	10	30	72	64	86	113	77	55	63	98
HORVU1Hr1G009570	0	0	2	1	0	1	0	2	1	1	0	2	0	0	0	1
HORVU1Hr1G009580	0	0	0	0	0	0	0	0	0	0	0	0	0	0	0	0
HORVU1Hr1G009590	0	0	7	17	12	11	0	1	3	2	11	19	14	5	7	21
HORVU1Hr1G009600	8	21	32	2	7	0	0	0	55	34	10	19	21	4	13	12
HORVU1Hr1G009610	144	181	165	33	42	30	6	4	280	169	48	82	80	63	146	71
HORVU1Hr1G009630	0	0	1	0	0	0	0	0	0	0	0	0	0	0	0	0
HORVU1Hr1G009640	27	79	4	2	1	1	4	2	2	3	2	3	4	1	1	6
HORVU1Hr1G009720	0	0	1	2	0	2	0	3	1	0	0	2	0	0	0	1
HORVU1Hr1G009800	46	350	5	0	6	0	0	0	0	1	1	0	68	5	0	4
HORVU1Hr1G009870	0	0	0	0	0	0	0	0	1	0	0	0	3	0	0	0
HORVU1Hr1G009880	0	0	0	0	0	0	0	0	0	1	0	0	2	0	2	0
HORVU1Hr1G009900	542	769	997	1135	848	851	301	449	1186	792	817	1253	919	867	601	1058
HORVU1Hr1G009910	0	0	0	0	0	0	0	0	1	0	0	0	0	0	0	0
HORVU1Hr1G009920	679	1150	1911	3074	2370	1334	1228	1464	3906	3435	5698	8055	4496	2671	3004	3843
HORVU1Hr1G009940	1	9	5	2	8	4	1	2	3	2	3	3	3	2	1	9
HORVU1Hr1G009950	2577	2480	3775	3425	2168	2029	1397	1430	2618	2229	2064	3061	1726	1788	1302	2227
HORVU1Hr1G009970	1	0	3	0	3	1	1	4	2	0	1	2	4	3	1	4
HORVU1Hr1G009980	952	817	899	827	668	672	507	571	834	683	584	618	567	657	405	654
HORVU1Hr1G010010	236	210	282	219	281	169	323	193	399	340	363	268	565	644	346	1131
HORVU1Hr1G010020	233	316	405	395	618	342	329	370	489	438	479	566	1131	921	471	2110
HORVU1Hr1G010110	53	46	80	70	47	46	16	30	29	22	11	31	25	21	13	31
HORVU1Hr1G010120	274	1369	15	0	0	0	2	0	2	8	3	2	3	3	14	2
HORVU1Hr1G010130	1702	2603	2941	3150	1244	1040	1478	1354	2575	2722	3172	5016	1473	1723	1632	1445
HORVU1Hr1G010140	0	0	0	0	0	0	0	1	0	0	0	0	0	0	0	0
HORVU1Hr1G010190	24	57	15	31	26	15	22	20	20	10	23	26	137	88	17	214
HORVU1Hr1G010210	4	16	6	1	337	2	43	97	129	425	1282	729	455	566	575	1047
HORVU1Hr1G010220	72	114	87	110	39	41	40	16	92	71	66	89	51	42	34	61
HORVU1Hr1G010230	56	41	54	53	173	70	631	532	9	24	57	50	486	123	80	271
HORVU1Hr1G010250	72	11	54	6	1128	92	822	861	8	3	45	7	972	1075	94	1372
HORVU1Hr1G010280	2	1	7	5	12	14	13	4	10	0	5	5	10	15	10	14
HORVU1Hr1G010300	0	0	0	0	0	0	0	0	0	0	0	0	0	0	0	0
HORVU1Hr1G010350	0	0	0	0	0	0	0	0	0	0	0	0	0	0	0	0
HORVU1Hr1G010360	0	1	0	0	0	0	0	0	0	0	0	0	0	0	0	0
HORVU1Hr1G010380	32	41	127	93	544	69	210	265	111	130	493	393	2564	1898	157	4763
HORVU1Hr1G010390	1	4	2	1	10	0	13	4	2	3	6	14	20	10	0	53
HORVU1Hr1G010400	12	6	15	11	20	11	52	30	23	14	35	25	20	20	24	9
HORVU1Hr1G010500	17	29	37	38	26	27	54	22	32	38	28	36	29	19	11	19
HORVU1Hr1G010510	380	398	623	462	315	299	377	294	425	339	459	575	431	376	265	539
HORVU1Hr1G010520	79	97	59	35	24	31	21	10	110	76	56	57	34	27	20	24
HORVU1Hr1G010530	72	87	43	22	15	20	12	4	38	33	28	23	16	8	7	9
HORVU1Hr1G010560	2	6	4	4	3	6	4	1	4	1	9	4	3	3	3	6
HORVU1Hr1G010580	1	1	0	3	2	1	2	1	1	0	1	0	2	0	2	1
HORVU1Hr1G010600	0	0	0	0	0	0	0	0	0	0	0	0	0	0	0	0
HORVU1Hr1G010640	0	0	0	0	0	0	0	0	0	0	0	0	0	0	0	0
HORVU1Hr1G010660	5	14	13	21	22	5	2	3	15	12	16	22	18	5	14	13
HORVU1Hr1G010670	44	57	84	101	119	100	299	302	37	36	96	74	115	93	46	172
HORVU1Hr1G010710	0	0	0	0	0	0	0	0	0	0	0	0	0	0	0	0
HORVU1Hr1G010720	0	0	0	0	0	0	0	0	0	0	0	0	0	0	0	0
HORVU1Hr1G010730	0	0	0	0	0	0	0	0	0	0	0	0	0	0	0	0
HORVU1Hr1G010740	0	0	0	0	0	0	0	0	0	0	0	0	0	0	0	0
HORVU1Hr1G010780	308	347	347	381	221	187	223	190	412	383	393	477	296	271	218	395
HORVU1Hr1G010790	0	0	0	0	0	0	0	0	0	0	0	0	0	0	0	0
HORVU1Hr1G010800	1017	1538	2108	2121	1585	1549	615	1409	1392	934	883	1264	1401	990	949	1499
HORVU1Hr1G010810	38	48	74	79	165	82	123	96	47	40	124	143	493	198	49	621
HORVU1Hr1G010820	1432	1931	3199	2487	2065	2268	1359	2120	2132	1450	1568	2227	2080	1772	1605	2558
HORVU1Hr1G010830	0	1	3	0	0	1	0	1	0	0	0	3	2	0	1	3
HORVU1Hr1G010840	0	0	0	0	0	0	0	0	0	0	0	0	0	0	0	0
HORVU1Hr1G010890	58	167	190	177	96	96	33	53	101	61	82	157	80	79	57	127
HORVU1Hr1G010910	3	4	1	1	1	0	1	1	1	1	6	1	6	0	0	1
HORVU1Hr1G010920	0	1	4	4	5	5	0	0	1	2	0	4	3	1	6	2
HORVU1Hr1G010930	4008	4543	6104	6100	4382	4255	2727	3432	5251	3267	3121	4997	3791	3475	2661	4840
HORVU1Hr1G010940	2238	2504	3428	3448	2130	2119	1551	1896	2667	1671	1488	2616	1985	1808	1409	2719
HORVU1Hr1G010960	37	82	88	138	96	67	24	50	72	50	32	93	97	66	58	82
HORVU1Hr1G010970	53	129	169	150	92	77	21	63	95	38	84	132	95	77	56	107
HORVU1Hr1G010980	1	3	7	4	8	5	4	5	5	4	0	6	8	7	2	7
HORVU1Hr1G010990	15	45	53	43	38	28	7	25	22	6	25	54	28	22	16	34
HORVU1Hr1G011020	48	99	151	126	77	82	25	55	93	41	54	104	86	78	46	97
HORVU1Hr1G011030	61	119	167	171	207	124	61	123	208	103	177	254	381	220	112	553
HORVU1Hr1G011060	0	1	0	2	5	1	0	0	2	0	2	2	2	1	1	3
HORVU1Hr1G011080	7	10	8	13	8	6	0	6	10	4	4	17	7	10	4	14
HORVU1Hr1G011100	3	4	4	4	4	0	3	1	3	3	4	4	3	0	1	2
HORVU1Hr1G011110	0	0	0	0	0	0	0	0	0	0	0	0	0	0	0	0
HORVU1Hr1G011120	0	0	0	0	0	0	0	0	0	1	0	0	0	0	0	0
HORVU1Hr1G011150	63	184	248	280	118	123	24	68	146	75	120	177	108	103	85	135
HORVU1Hr1G011160	69	186	245	270	140	141	32	94	137	96	106	183	138	110	86	173
HORVU1Hr1G011180	0	1	1	1	2	2	0	0	0	0	0	4	0	1	1	1
HORVU1Hr1G011190	0	1	8	4	0	0	0	1	3	2	5	3	3	2	4	2
HORVU1Hr1G011200	0	0	2	3	1	0	0	0	7	0	0	0	0	0	0	0
HORVU1Hr1G011210	3	3	1	0	0	0	1	0	1	2	2	1	3	0	0	1
HORVU1Hr1G011220	2	0	1	3	2	0	0	0	0	2	0	2	3	2	1	0
HORVU1Hr1G011240	17	47	79	64	36	24	12	17	32	11	21	57	27	26	25	45
HORVU1Hr1G011250	100	187	272	253	126	113	41	98	151	79	120	187	108	119	78	153
HORVU1Hr1G011260	4	8	7	8	3	1	6	1	4	2	9	3	2	0	0	1
HORVU1Hr1G011290	11	34	48	32	22	37	9	12	18	7	25	36	17	28	10	18
HORVU1Hr1G011300	160	243	397	378	221	173	62	166	251	134	157	276	162	180	142	255
HORVU1Hr1G011350	21	25	33	34	24	19	20	17	36	24	32	28	20	17	14	20
HORVU1Hr1G011360	1	0	1	0	0	0	0	0	0	0	0	0	0	0	0	0
HORVU1Hr1G011370	1142	1126	1298	1035	1048	945	435	424	1226	1188	694	594	624	629	437	547
HORVU1Hr1G011380	1	1	5	2	13	12	35	1	9	17	8	12	10	23	11	16
HORVU1Hr1G011390	146	104	147	209	280	193	202	169	255	214	192	326	213	304	123	315
HORVU1Hr1G011400	352	403	613	660	654	435	392	372	925	678	662	1037	696	781	534	1048
HORVU1Hr1G011420	111	142	217	196	184	116	113	105	328	274	255	388	272	287	239	418
HORVU1Hr1G011430	1065	1142	1073	1087	865	777	606	550	854	643	843	1079	995	1106	816	1408
HORVU1Hr1G011440	1	1	2	2	0	0	0	5	0	0	0	0	0	0	0	1
HORVU1Hr1G011450	0	0	0	0	0	0	6	1	4	15	10	2	7	11	2	18
HORVU1Hr1G011480	0	0	0	1	0	0	2	0	1	0	1	1	0	0	0	0
HORVU1Hr1G011490	0	0	1	0	0	1	0	0	1	0	0	0	1	0	0	1
HORVU1Hr1G011500	172	186	277	197	126	178	103	113	128	67	49	121	106	70	70	109
HORVU1Hr1G011520	3290	3384	3582	5861	6844	7486	9424	8973	5782	4637	4414	5577	5329	5563	5363	6654
HORVU1Hr1G011530	3292	3387	3589	5866	6846	7489	9426	8975	5786	4639	4419	5586	5332	5566	5366	6657
HORVU1Hr1G011540	69	80	117	126	135	88	45	62	170	110	87	181	128	129	78	220
HORVU1Hr1G011550	8	6	5	8	3	7	2	6	10	5	10	13	5	6	6	2
HORVU1Hr1G011570	8	6	5	8	3	7	2	6	10	5	10	13	5	6	6	2
HORVU1Hr1G011610	2	6	10	7	15	4	11	6	16	6	14	18	78	38	5	217
HORVU1Hr1G011630	1	1	3	13	5	6	0	7	5	3	0	9	7	4	3	6
HORVU1Hr1G011650	0	0	1	0	4	0	0	0	5	0	1	0	0	0	1	1
HORVU1Hr1G011660	0	0	0	2	1	1	3	1	1	0	4	2	3	0	1	10
HORVU1Hr1G011720	164	201	250	328	328	255	111	155	403	342	258	257	268	297	243	201
HORVU1Hr1G011730	252	332	586	320	637	405	175	311	189	129	69	131	589	82	202	151
HORVU1Hr1G011740	0	1	0	0	0	3	0	0	0	0	0	0	0	0	0	0
HORVU1Hr1G011780	210	180	168	158	108	99	145	81	165	137	170	175	88	91	72	125
HORVU1Hr1G011800	1021	1098	822	1107	1062	850	405	425	178	76	97	51	220	90	44	152
HORVU1Hr1G011820	0	0	0	0	0	0	0	0	0	0	0	1	0	2	0	0
HORVU1Hr1G011830	0	0	0	0	0	0	0	0	0	0	0	0	0	0	0	1
HORVU1Hr1G011840	41	54	89	119	85	80	43	47	79	71	56	64	54	45	43	57
HORVU1Hr1G011860	0	0	0	0	0	0	0	0	0	0	1	0	0	0	0	3
HORVU1Hr1G011890	107	135	233	257	158	127	51	72	142	73	138	225	155	147	79	228
HORVU1Hr1G011900	224	230	369	425	297	238	107	150	256	181	231	328	230	213	141	330
HORVU1Hr1G011920	0	0	0	0	0	0	0	0	0	0	0	1	0	0	0	0
HORVU1Hr1G011930	0	0	0	0	0	0	0	0	0	0	0	0	1	0	0	0
HORVU1Hr1G011950	0	0	0	0	0	0	0	0	0	0	0	0	0	0	0	0
HORVU1Hr1G011960	2	5	3	4	6	1	0	2	4	0	2	2	2	0	0	3
HORVU1Hr1G011980	2	4	10	9	8	9	0	4	9	8	6	4	2	3	0	4
HORVU1Hr1G011990	96	142	342	132	3	7	3	5	9	3	5	1417	655	9	2	9
HORVU1Hr1G012060	0	0	1	0	3	3	1	2	38	11	10	19	16	9	7	7
HORVU1Hr1G012080	14	19	45	23	0	0	0	0	0	0	0	221	98	1	0	1
HORVU1Hr1G012090	0	0	0	0	0	0	0	0	1	0	0	0	0	0	0	0
HORVU1Hr1G012110	1835	2173	2434	2795	2421	2386	2919	2816	2349	1878	2234	3144	2378	2105	2228	2966
HORVU1Hr1G012130	0	0	0	0	0	0	2	0	0	0	0	0	0	0	0	0
HORVU1Hr1G012140	205	907	258	37	51	2	0	0	5	18	20	2622	9	3	4	11
HORVU1Hr1G012150	1672	1984	2225	2570	2263	2246	2669	2641	2100	1704	2082	2890	2223	1943	2078	2714
HORVU1Hr1G012170	0	0	0	0	0	0	0	0	0	0	0	0	0	0	0	0
HORVU1Hr1G012180	113	150	281	133	79	124	24	93	101	61	41	74	110	58	72	54
HORVU1Hr1G012190	397	494	1074	545	385	549	123	293	274	160	136	212	406	197	262	181
HORVU1Hr1G012210	0	0	1	0	0	1	0	0	2	1	0	2	0	1	0	0
HORVU1Hr1G012220	5	5	4	5	1	4	4	1	7	6	12	9	3	5	8	7
HORVU1Hr1G012240	159	237	141	133	212	137	156	179	220	192	252	222	231	211	136	348
HORVU1Hr1G012250	0	0	0	2	0	0	0	3	0	0	0	0	2	0	0	0
HORVU1Hr1G012270	137	116	140	112	151	154	97	81	113	123	119	134	145	121	69	140
HORVU1Hr1G012290	8	11	15	13	17	10	8	7	17	21	11	26	21	13	17	23
HORVU1Hr1G012300	0	0	6	1	1	1	0	1	0	4	2	3	5	1	0	1
HORVU1Hr1G012310	0	0	0	0	0	0	0	0	0	0	0	0	0	0	0	0
HORVU1Hr1G012320	0	0	0	0	0	0	1	0	0	0	0	0	0	0	0	0
HORVU1Hr1G012330	2	0	0	0	0	0	0	0	0	0	0	0	0	0	0	0
HORVU1Hr1G012340	2	5	10	16	13	5	2	4	9	1	4	14	9	5	3	12
HORVU1Hr1G012350	3	1	2	1	4	1	0	3	0	3	1	1	0	1	2	1
HORVU1Hr1G012360	0	2	0	1	2	3	0	0	1	0	0	1	1	1	0	7
HORVU1Hr1G012380	0	0	1	0	0	0	0	0	0	0	0	0	0	0	0	0
HORVU1Hr1G012420	157	210	298	216	153	138	75	100	169	144	144	277	177	139	139	156
HORVU1Hr1G012440	308	684	831	462	365	407	319	324	337	299	374	394	424	390	296	599
HORVU1Hr1G012460	57	47	57	73	89	80	54	68	84	77	94	148	122	140	66	201
HORVU1Hr1G012470	700	766	845	763	653	606	529	549	1187	1142	955	968	813	876	577	1018
HORVU1Hr1G012490	9	5	17	3	4	3	5	1	3	4	2	2	6	2	1	4
HORVU1Hr1G012520	29	10	18	11	10	12	17	10	7	10	9	7	10	11	9	8
HORVU1Hr1G012600	0	0	0	5	2	4	1	3	2	0	0	0	1	0	2	1
HORVU1Hr1G012610	0	0	0	0	0	0	0	0	0	0	0	0	0	0	0	0
HORVU1Hr1G012660	0	0	0	0	0	0	0	0	0	0	0	0	0	0	0	0
HORVU1Hr1G012670	0	0	0	0	0	0	0	0	0	0	0	0	0	0	0	0
HORVU1Hr1G012680	1313	1376	1461	850	760	737	787	1095	947	1260	1246	1182	883	696	658	801
HORVU1Hr1G012690	5555	7746	5745	3230	2368	1793	1598	1525	3592	3359	2459	2737	2451	2175	1470	2564
HORVU1Hr1G012700	0	0	0	0	0	0	0	0	0	0	0	0	0	0	0	0
HORVU1Hr1G012710	0	1	0	0	0	1	0	0	0	0	0	0	0	0	0	0
HORVU1Hr1G012720	1	2	4	3	4	2	0	2	4	1	1	7	14	24	0	24
HORVU1Hr1G012730	320	373	393	395	311	229	182	207	546	466	503	729	582	563	335	832
HORVU1Hr1G012740	2	1	5	9	5	1	10	4	15	6	9	20	6	6	10	16
HORVU1Hr1G012760	0	0	0	0	5	6	4	1	0	1	0	1	4	0	1	2
HORVU1Hr1G012770	0	0	0	0	0	0	0	0	0	0	0	0	0	0	0	0
HORVU1Hr1G012790	0	0	0	0	0	0	0	0	0	0	0	0	0	0	0	0
HORVU1Hr1G012800	0	0	0	0	0	0	0	0	0	0	0	0	0	0	0	0
HORVU1Hr1G012810	0	0	0	0	0	0	0	0	0	0	0	0	0	0	0	0
HORVU1Hr1G012840	0	0	0	0	0	0	0	0	0	0	0	0	0	0	0	0
HORVU1Hr1G012850	0	0	0	0	0	0	0	0	0	0	0	0	0	0	0	0
HORVU1Hr1G012870	0	0	0	0	0	0	0	0	0	0	0	0	0	0	0	0
HORVU1Hr1G012880	0	0	0	0	0	0	0	0	0	0	0	0	0	0	0	0
HORVU1Hr1G012890	0	0	0	0	0	0	0	0	0	0	0	0	0	0	0	0
HORVU1Hr1G012910	0	0	0	0	0	0	0	0	0	0	0	0	0	0	0	0
HORVU1Hr1G012920	7	8	8	6	4	6	5	5	7	2	3	5	7	10	2	6
HORVU1Hr1G012930	0	0	0	0	0	0	0	0	0	0	0	0	0	0	0	0
HORVU1Hr1G012940	0	0	0	0	0	0	0	0	0	0	0	0	0	0	0	0
HORVU1Hr1G012950	0	0	0	0	0	0	0	0	0	0	0	0	0	0	0	0
HORVU1Hr1G012960	0	0	0	0	0	0	0	0	0	0	0	0	0	0	0	0
HORVU1Hr1G013020	0	0	0	0	0	0	0	0	0	0	0	0	0	0	0	0
HORVU1Hr1G013040	226	274	430	473	351	247	257	310	498	386	365	600	450	424	301	663
HORVU1Hr1G013140	0	6	2	4	5	5	0	1	4	0	2	9	4	2	1	6
HORVU1Hr1G013160	744	681	888	843	673	665	682	634	853	616	637	772	663	661	440	922
HORVU1Hr1G013180	0	0	0	0	0	0	0	0	0	0	0	0	0	0	0	0
HORVU1Hr1G013190	866	379	515	269	668	538	669	845	293	276	922	478	2297	1442	240	4173
HORVU1Hr1G013210	301	373	588	576	1039	737	829	857	731	688	875	1171	2195	1861	710	3839
HORVU1Hr1G013240	0	0	3	2	2	2	0	0	1	0	0	0	1	1	0	0
HORVU1Hr1G013270	0	1	0	0	0	0	1	0	0	0	2	2	2	3	2	1
HORVU1Hr1G013360	70	90	102	67	42	47	60	41	45	60	25	44	49	56	26	60
HORVU1Hr1G013420	0	1	1	1	0	0	0	0	0	0	1	0	0	1	0	1
HORVU1Hr1G013430	4	14	15	5	2	5	0	3	7	6	4	8	5	2	5	8
HORVU1Hr1G013440	0	0	0	0	0	0	0	0	0	0	0	0	0	0	0	0
HORVU1Hr1G013450	47	105	93	59	29	39	2	31	58	33	34	53	38	23	23	49
HORVU1Hr1G013470	7	6	23	1	24	11	20	12	14	6	17	7	19	20	8	27
HORVU1Hr1G013480	68	85	33	15	11	7	14	9	14	15	2	4	5	2	15	11
HORVU1Hr1G013490	126	138	247	294	284	194	98	158	292	163	175	318	251	184	175	337
HORVU1Hr1G013500	0	0	0	0	1	0	0	0	0	0	0	0	0	0	0	0
HORVU1Hr1G013520	0	0	0	1	0	0	0	0	0	0	0	0	0	0	0	0
HORVU1Hr1G013540	3	4	5	5	4	6	3	6	11	11	3	11	6	5	2	6
HORVU1Hr1G013580	140	238	270	358	233	213	114	139	246	171	177	286	264	222	149	318
HORVU1Hr1G013600	1516	2048	2720	2809	2270	1922	634	1521	2705	1604	1465	2641	2425	1832	1713	2622
HORVU1Hr1G013620	0	1	1	3	0	0	2	1	0	2	0	1	0	1	0	2
HORVU1Hr1G013660	4	4	22	5	8	4	0	1	40	25	66	45	176	84	55	311
HORVU1Hr1G013670	0	3	1	0	1	0	0	2	3	0	0	0	1	1	1	0
HORVU1Hr1G013680	0	0	0	0	0	0	0	0	0	0	1	0	0	0	0	0
HORVU1Hr1G013690	0	0	0	0	0	0	0	0	0	0	1	0	0	0	0	0
HORVU1Hr1G013700	65	55	81	64	71	37	29	26	85	54	48	60	101	119	30	153
HORVU1Hr1G013720	1	0	0	1	1	1	0	1	0	1	1	1	0	1	0	1
HORVU1Hr1G013730	334	422	557	546	325	279	159	183	444	286	309	437	445	323	221	463
HORVU1Hr1G013740	8333	13134	14836	15584	12246	12727	17052	17106	11329	9447	10562	14388	9451	11130	10823	10537
HORVU1Hr1G013750	200	205	254	144	128	76	115	74	187	175	163	168	130	155	116	195
HORVU1Hr1G013780	1033	969	1092	1124	870	755	594	582	1263	1041	842	1059	968	926	594	1212
HORVU1Hr1G013810	165	289	525	620	381	263	72	190	330	237	224	440	276	169	187	373
HORVU1Hr1G013820	5407	6740	9587	7734	4547	4157	2510	2756	6594	5668	4487	4029	4617	6756	3848	6978
HORVU1Hr1G013840	3725	4493	6607	4868	2845	2465	1742	1769	4608	3857	3022	2574	2938	4334	2520	4667
HORVU1Hr1G013870	146	106	227	154	92	85	35	47	168	154	112	64	73	89	86	87
HORVU1Hr1G013880	3	4	6	3	0	1	2	0	1	2	2	5	3	1	0	3
HORVU1Hr1G013900	3473	5014	5335	5367	4444	4522	3426	5209	4546	3028	2473	4450	2991	2710	2745	2716
HORVU1Hr1G013950	133	128	178	141	129	100	38	48	155	143	91	108	92	99	73	107
HORVU1Hr1G013960	0	1	0	0	0	0	0	0	0	0	1	0	1	0	0	0
HORVU1Hr1G013970	279	436	649	312	281	394	514	527	159	117	189	237	206	170	210	177
HORVU1Hr1G013980	0	0	0	0	0	0	0	0	0	0	0	0	0	0	0	0
HORVU1Hr1G013990	358	322	501	509	277	236	121	124	458	279	201	353	209	220	157	250
HORVU1Hr1G014000	107	170	270	296	166	176	75	56	190	173	109	169	123	115	83	106
HORVU1Hr1G014010	890	1479	1930	1783	1141	1132	352	558	1809	1439	1487	3237	1578	1448	1189	1442
HORVU1Hr1G014020	0	0	0	0	0	0	0	0	0	0	0	0	0	0	0	0
HORVU1Hr1G014030	16	47	61	64	19	18	16	7	38	33	22	53	16	28	14	25
HORVU1Hr1G014040	22	39	57	38	18	9	15	4	24	32	21	38	8	10	12	17
HORVU1Hr1G014050	65	58	77	59	42	45	44	61	103	51	91	73	34	48	37	70
HORVU1Hr1G014060	36	100	153	135	65	63	23	48	100	53	69	154	79	46	45	87
HORVU1Hr1G014070	961	1019	1193	1619	913	862	693	716	756	902	875	1134	547	530	365	694
HORVU1Hr1G014080	697	574	645	720	510	561	500	368	706	631	508	649	447	504	353	544
HORVU1Hr1G014120	2042	3693	6086	6183	5648	4377	1244	3359	4747	2695	2594	4344	4254	2624	2611	4210
HORVU1Hr1G014140	318	362	267	327	434	537	670	555	417	385	370	395	319	287	286	267
HORVU1Hr1G014150	0	1	1	0	0	0	0	0	0	0	1	0	1	0	0	0
HORVU1Hr1G014200	2	11	1	4	3	2	3	0	2	6	3	11	8	4	3	5
HORVU1Hr1G014230	0	0	1	0	0	1	0	0	0	0	0	0	0	0	1	0
HORVU1Hr1G014270	1	5	12	12	11	4	0	8	9	0	2	7	10	9	14	10
HORVU1Hr1G014280	0	0	0	1	0	0	0	0	0	0	0	0	0	1	0	0
HORVU1Hr1G014370	773	834	1503	1142	615	308	238	213	607	381	457	764	889	741	309	1773
HORVU1Hr1G014410	15	16	9	8	6	6	2	7	1	2	4	5	11	5	5	15
HORVU1Hr1G014560	22	12	23	30	29	36	19	19	42	25	18	20	24	32	29	22
HORVU1Hr1G014570	14	8	6	1	27	0	0	0	2	1	30	3	48	4	4	16
HORVU1Hr1G014580	11	14	8	18	34	3	8	10	15	23	67	27	142	30	29	37
HORVU1Hr1G014590	8	2	1	0	0	0	0	0	1	2	6	2	5	0	0	5
HORVU1Hr1G014610	1405	1442	1859	1530	978	941	567	586	1383	1062	812	1283	1053	1000	661	1313
HORVU1Hr1G014630	0	0	0	0	0	0	0	0	0	0	0	0	0	0	0	0
HORVU1Hr1G014640	0	1	0	0	0	0	0	0	0	0	0	0	0	0	0	0
HORVU1Hr1G014690	0	0	0	0	0	0	0	0	0	0	0	0	0	0	0	0
HORVU1Hr1G014700	0	1	0	0	0	0	0	0	0	0	0	0	0	0	0	0
HORVU1Hr1G014710	769	694	777	657	353	316	299	244	688	478	394	555	463	448	275	489
HORVU1Hr1G014730	5485	6028	6757	8279	4684	6377	2343	5072	8290	5137	4096	4352	5742	7123	5072	6344
HORVU1Hr1G014800	418	439	559	534	354	385	368	268	694	573	496	621	346	412	267	440
HORVU1Hr1G014880	0	0	0	0	0	0	0	0	0	0	0	0	0	0	0	0
HORVU1Hr1G014910	10	17	18	12	14	11	1	4	2	1	18	23	12	5	4	18
HORVU1Hr1G014950	15	40	39	9	9	7	1	9	82	70	48	61	41	43	55	42
HORVU1Hr1G014990	177	319	238	217	177	154	242	182	246	236	257	229	89	112	85	100
HORVU1Hr1G015000	2153	2842	2450	2600	1802	1898	4264	2277	2053	1524	2151	2499	1764	1923	1557	1871
HORVU1Hr1G015040	322	421	444	367	182	164	167	196	327	294	307	333	242	209	156	271
HORVU1Hr1G015050	187	454	250	156	15	40	43	111	15	18	89	171	12	18	9	26
HORVU1Hr1G015060	186	196	216	192	150	132	144	123	234	259	196	201	186	157	99	217
HORVU1Hr1G015090	104	218	381	48	19	17	0	6	4	1	1	4	4	1	0	3
HORVU1Hr1G015130	63	82	164	162	171	108	39	101	177	98	141	196	295	239	97	497
HORVU1Hr1G015140	2	2	5	6	2	1	0	2	2	1	3	6	3	1	0	2
HORVU1Hr1G015180	2	4	5	5	8	3	6	2	8	5	4	5	4	9	1	2
HORVU1Hr1G015190	0	0	0	0	0	0	0	0	0	0	0	0	0	0	0	0
HORVU1Hr1G015210	8	26	25	8	3	6	6	5	96	18	20	30	37	22	31	30
HORVU1Hr1G015240	11	10	26	30	19	28	18	10	24	16	23	24	31	21	18	31
HORVU1Hr1G015260	3	10	9	2	16	0	0	4	1	3	41	43	199	156	2	299
HORVU1Hr1G015270	190	163	257	345	197	190	239	137	278	246	250	416	285	286	199	343
HORVU1Hr1G015300	0	0	0	0	0	0	0	0	0	0	0	0	0	0	0	0
HORVU1Hr1G015310	251	331	478	459	426	370	200	252	483	331	348	432	324	347	247	377
HORVU1Hr1G015350	0	0	0	0	0	1	0	0	0	0	0	0	0	0	0	0
HORVU1Hr1G015420	0	0	0	0	0	0	0	0	0	0	0	0	3	0	0	2
HORVU1Hr1G015430	0	0	0	0	0	0	0	0	0	0	0	0	1	0	0	1
HORVU1Hr1G015490	1920	2310	3345	3636	3056	3110	2131	2310	3039	1922	1852	2529	2419	2211	1804	2739
HORVU1Hr1G015500	2364	3216	3160	3664	1387	1050	783	919	1708	1737	1824	2453	870	1091	530	1711
HORVU1Hr1G015540	2	1	1	3	8	13	21	22	5	1	5	0	6	3	5	15
HORVU1Hr1G015550	2327	2217	2526	1607	632	722	507	659	1001	930	789	998	751	790	501	1026
HORVU1Hr1G015560	3395	3379	3554	2565	1047	1273	786	1062	1513	1329	1210	1539	1264	1201	782	1591
HORVU1Hr1G015580	0	1	5	9	3	2	2	0	3	0	0	5	3	2	1	1
HORVU1Hr1G015590	2812	3698	3997	3579	2626	2108	1552	1861	3020	2632	2583	2675	2993	2660	1547	4459
HORVU1Hr1G015610	1	0	0	0	0	0	0	0	0	0	1	0	0	1	0	1
HORVU1Hr1G015620	208	254	329	390	325	337	112	330	350	257	262	292	299	254	236	392
HORVU1Hr1G015660	2734	2486	3245	3606	2921	2982	776	1886	2774	1771	1596	1691	3101	2335	1451	2952
HORVU1Hr1G015670	256	235	271	323	205	133	163	111	295	134	156	238	175	154	89	255
HORVU1Hr1G015690	9	12	10	20	10	8	4	7	2	2	6	19	9	9	6	8
HORVU1Hr1G015710	0	0	0	0	0	0	0	0	0	0	0	0	0	0	0	0
HORVU1Hr1G015720	2	1	0	0	1	1	1	1	2	1	2	1	1	1	0	2
HORVU1Hr1G015750	0	0	0	1	0	0	0	0	0	0	0	0	0	0	0	0
HORVU1Hr1G015770	767	776	1091	1004	809	899	127	399	568	489	389	412	434	307	328	137
HORVU1Hr1G015810	276	304	481	405	319	308	99	176	357	302	182	287	216	173	192	152
HORVU1Hr1G015820	348	340	456	484	333	335	283	285	535	387	417	593	327	392	236	461
HORVU1Hr1G015840	0	0	0	0	0	0	0	0	0	0	0	0	0	0	0	0
HORVU1Hr1G015850	0	0	0	0	0	0	4	0	0	0	0	0	0	0	0	0
HORVU1Hr1G015870	0	0	0	0	1	0	3	0	0	0	0	0	8	13	0	20
HORVU1Hr1G015890	0	0	0	0	2	0	0	1	0	1	0	0	6	1	0	27
HORVU1Hr1G015910	53	51	15	32	68	45	26	63	25	34	38	26	42	12	10	31
HORVU1Hr1G015920	1	1	2	3	1	1	2	0	1	0	0	0	1	0	0	0
HORVU1Hr1G015940	1574	1654	2249	1954	1253	1476	1320	1183	1391	891	1105	1581	925	878	838	1102
HORVU1Hr1G015970	0	0	2	0	0	4	0	0	0	0	0	1	0	0	1	0
HORVU1Hr1G015980	0	3	0	3	2	1	0	4	0	1	1	1	3	1	0	4
HORVU1Hr1G016000	1	0	2	3	1	6	0	0	2	0	4	6	1	0	0	0
HORVU1Hr1G016030	1	0	0	0	1	0	0	0	0	0	0	1	0	0	0	0
HORVU1Hr1G016050	31	46	32	42	47	22	3	14	27	26	26	41	45	32	29	47
HORVU1Hr1G016060	31	46	32	42	47	22	3	14	27	26	26	41	44	32	29	46
HORVU1Hr1G016080	158	89	88	100	212	145	376	135	452	287	221	277	201	198	226	168
HORVU1Hr1G016110	280	277	341	321	299	256	240	271	302	262	244	242	285	254	123	406
HORVU1Hr1G016120	15	33	28	45	39	38	15	31	19	8	21	33	48	13	7	31
HORVU1Hr1G016130	1121	1320	1649	1433	1372	1238	691	1103	1111	875	771	1086	1138	934	702	1425
HORVU1Hr1G016140	202	142	123	143	92	109	45	49	104	103	71	55	65	42	33	22
HORVU1Hr1G016170	682	811	926	946	1027	925	528	671	676	685	625	613	575	511	364	715
HORVU1Hr1G016180	0	1	4	5	4	3	3	4	4	0	2	9	4	4	1	4
HORVU1Hr1G016190	36	80	79	103	273	45	14	37	64	81	146	143	270	82	51	240
HORVU1Hr1G016200	141	220	174	247	2342	116	136	216	272	340	1049	891	2573	682	345	2276
HORVU1Hr1G016240	373	428	445	606	528	482	349	306	708	626	459	485	551	490	311	734
HORVU1Hr1G016270	6	1	5	3	3	0	1	2	3	2	1	4	5	0	0	2
HORVU1Hr1G016280	154	125	152	183	106	123	50	92	162	89	91	105	104	128	82	112
HORVU1Hr1G016320	42	65	94	109	134	75	30	66	100	88	130	238	351	178	93	347
HORVU1Hr1G016360	880	904	1374	934	896	825	914	939	1053	634	635	837	964	790	676	1305
HORVU1Hr1G016370	198	274	304	528	492	352	230	242	404	272	320	471	499	408	290	687
HORVU1Hr1G016400	0	0	0	0	0	0	0	1	0	0	0	0	0	0	0	0
HORVU1Hr1G016420	1	1	0	2	1	1	0	2	0	0	5	3	1	0	2	1
HORVU1Hr1G016430	678	871	1414	1244	1084	959	587	691	1144	723	697	970	958	776	651	1036
HORVU1Hr1G016470	5	4	11	4	10	3	0	2	3	9	3	5	13	5	4	16
HORVU1Hr1G016480	2221	2336	2136	2085	968	1042	661	512	1687	1264	1205	1583	1034	1030	733	1341
HORVU1Hr1G016490	1770	2345	2778	2641	2380	2039	1223	1406	2855	2072	1668	2240	2228	2112	1611	2798
HORVU1Hr1G016500	0	1	0	0	0	0	0	0	0	0	0	0	0	0	0	0
HORVU1Hr1G016540	263	508	1013	1106	1228	885	330	618	1091	639	694	1469	1112	860	922	1376
HORVU1Hr1G016590	2	3	8	6	13	7	0	6	9	7	18	18	12	4	4	19
HORVU1Hr1G016600	8	32	55	57	33	22	14	23	42	17	23	59	70	40	22	93
HORVU1Hr1G016610	0	0	0	0	0	0	0	0	0	0	0	0	2	0	1	0
HORVU1Hr1G016630	1055	1445	2087	1953	1760	1353	483	762	2247	1363	1124	1443	1144	1069	837	1046
HORVU1Hr1G016640	1819	2017	1977	1714	1883	1640	852	847	2316	2319	1707	1483	1157	1290	1109	1053
HORVU1Hr1G016660	243	624	269	148	1500	131	498	640	908	952	2026	1949	3267	2239	865	4306
HORVU1Hr1G016700	1	4	2	1	13	4	8	8	13	10	6	5	8	6	4	9
HORVU1Hr1G016710	395	507	753	735	557	488	282	426	714	460	424	560	399	394	318	480
HORVU1Hr1G016720	0	0	0	0	0	0	0	0	0	0	0	0	0	0	0	0
HORVU1Hr1G016730	0	0	0	0	0	0	0	0	0	0	0	0	0	0	0	0
HORVU1Hr1G016760	0	0	0	0	1	0	0	0	0	0	0	0	0	0	0	0
HORVU1Hr1G016770	0	1	3	0	18	1	1	9	7	6	11	7	97	123	2	198
HORVU1Hr1G016790	490	577	855	830	679	550	507	557	743	557	614	853	863	791	480	1204
HORVU1Hr1G016800	0	0	0	0	1	1	0	0	4	0	1	1	4	2	1	0
HORVU1Hr1G016820	1	11	0	0	1	0	0	0	0	0	0	0	0	0	0	0
HORVU1Hr1G016840	20	84	5	3	12	8	41	4	4	0	1	4	4	2	1	3
HORVU1Hr1G016870	0	5	0	0	1	0	0	0	0	0	0	0	0	0	0	0
HORVU1Hr1G016930	0	0	1	1	1	1	0	0	0	0	0	1	0	1	1	2
HORVU1Hr1G016960	0	0	2	1	1	1	0	0	0	0	0	1	0	1	1	2
HORVU1Hr1G016980	207	402	328	87	979	46	687	760	399	900	4343	5313	1934	1778	727	4540
HORVU1Hr1G017020	34	14	16	29	24	25	19	17	28	26	23	8	28	32	14	32
HORVU1Hr1G017050	7302	6713	7134	4631	1932	1462	1258	1866	1586	1299	3023	4233	1805	1405	1007	2162
HORVU1Hr1G017070	0	0	0	0	0	0	0	0	0	0	0	0	0	0	0	0
HORVU1Hr1G017080	0	0	0	0	0	0	0	0	0	0	0	0	0	0	0	0
HORVU1Hr1G017100	12	23	31	19	8	10	4	7	14	9	10	15	23	4	8	11
HORVU1Hr1G017120	2215	2610	2402	2736	1320	2198	802	2879	1539	1163	1050	1679	1797	1905	1650	2237
HORVU1Hr1G017170	5	0	4	2	44	4	19	16	12	12	24	19	245	99	7	556
HORVU1Hr1G017190	0	0	0	0	0	0	0	0	0	0	0	0	0	0	0	0
HORVU1Hr1G017210	319	322	477	517	473	427	278	274	485	364	352	468	286	361	240	266
HORVU1Hr1G017220	253	292	428	381	404	324	244	230	627	546	431	591	481	467	351	539
HORVU1Hr1G017230	78	77	100	103	99	70	125	72	152	124	84	127	89	100	49	143
HORVU1Hr1G017240	1242	2047	1233	797	546	575	319	442	487	366	430	534	532	360	260	601
HORVU1Hr1G017260	50	53	68	79	41	31	28	18	36	35	36	43	44	32	21	43
HORVU1Hr1G017270	50	53	65	73	40	31	27	14	34	32	36	42	43	31	21	42
HORVU1Hr1G017290	6	3	3	8	5	5	4	5	8	3	4	2	3	4	1	6
HORVU1Hr1G017320	101	97	147	130	90	106	84	64	143	110	86	87	93	74	80	110
HORVU1Hr1G017330	0	0	0	0	0	0	0	0	2	0	0	1	0	0	0	0
HORVU1Hr1G017370	69	89	155	144	72	53	14	35	41	20	28	23	46	26	17	23
HORVU1Hr1G017380	2899	6032	4711	1949	1520	1934	1484	1745	1643	1398	1762	3083	2020	1813	1241	2641
HORVU1Hr1G017410	101	84	41	43	365	62	226	155	213	353	842	328	2193	1608	212	4821
HORVU1Hr1G017430	1	2	1	3	1	1	1	0	1	1	2	2	0	1	0	1
HORVU1Hr1G017440	0	0	0	0	0	0	0	0	0	0	0	0	0	0	0	0
HORVU1Hr1G017460	8534	10397	18759	21412	11076	11206	4286	7207	14096	8164	7195	9714	9632	7065	8814	7341
HORVU1Hr1G017470	0	0	0	0	1	0	0	0	0	0	0	0	1	0	0	0
HORVU1Hr1G017480	5095	4807	5515	5277	2958	3605	1928	2478	2863	2207	1806	2435	1583	1679	1447	1422
HORVU1Hr1G017490	214	330	329	83	71	46	52	41	87	52	56	113	148	108	44	234
HORVU1Hr1G017500	343	507	503	126	125	85	72	88	121	62	113	164	244	184	88	368
HORVU1Hr1G017510	2	2	1	1	2	1	0	0	2	0	2	0	2	1	1	1
HORVU1Hr1G017520	0	0	0	0	1	0	0	2	0	0	1	0	0	0	0	0
HORVU1Hr1G017530	7	3	4	1	3	1	5	0	7	12	6	9	1	4	5	4
HORVU1Hr1G017550	0	0	0	0	0	0	0	0	0	0	0	0	0	0	0	0
HORVU1Hr1G017570	16733	20253	22711	17082	8239	8617	3481	3791	10015	7055	5639	8447	5331	4918	4105	4955
HORVU1Hr1G017580	1074	1079	1381	733	268	330	301	266	556	468	328	442	306	283	243	182
HORVU1Hr1G017660	3	3	3	2	109	6	7	11	6	4	10	16	25	21	6	30
HORVU1Hr1G017670	0	1	0	0	0	0	0	0	0	0	0	0	0	0	0	0
HORVU1Hr1G017700	3499	5109	2935	1017	362	540	259	772	639	414	251	1262	1167	1566	774	2315
HORVU1Hr1G017710	1364	1385	1569	1275	781	768	610	477	1016	887	655	955	769	769	499	841
HORVU1Hr1G017720	579	657	855	949	798	682	494	558	857	656	665	828	670	538	435	773
HORVU1Hr1G017730	402	421	500	615	470	440	267	333	487	337	369	427	351	273	219	407
HORVU1Hr1G017740	190	308	476	495	436	278	298	229	619	485	483	800	412	481	398	530
HORVU1Hr1G017750	156	276	438	450	400	255	251	200	556	423	421	731	365	440	369	478
HORVU1Hr1G017770	67	83	96	185	96	105	119	91	84	52	61	110	93	78	50	88
HORVU1Hr1G017800	16	22	12	7	0	2	1	3	2	1	6	10	2	2	4	6
HORVU1Hr1G017830	150	108	108	91	71	56	107	94	95	92	90	132	87	108	52	116
HORVU1Hr1G017840	0	0	0	0	1	0	0	0	0	0	0	0	0	0	0	0
HORVU1Hr1G017850	18	15	19	2	12	10	8	20	17	16	22	16	17	13	9	43
HORVU1Hr1G017860	28	45	59	34	32	24	45	33	70	50	62	68	59	52	34	109
HORVU1Hr1G017870	1774	2529	3183	1443	1143	1103	505	1315	1992	988	1674	1270	736	1010	561	1260
HORVU1Hr1G017900	38	111	161	75	160	30	25	95	25	27	98	46	289	259	34	566
HORVU1Hr1G017920	0	0	0	0	0	0	0	0	0	0	1	0	0	0	0	0
HORVU1Hr1G017930	0	0	0	0	0	0	0	0	0	0	1	0	0	0	0	0
HORVU1Hr1G017970	0	2	1	1	32	4	42	99	2	4	31	4	1064	943	5	1863
HORVU1Hr1G018000	0	0	0	0	0	0	0	0	0	0	0	0	0	0	0	0
HORVU1Hr1G018010	728	748	582	705	264	275	177	143	343	268	149	144	148	138	85	140
HORVU1Hr1G018020	19	28	39	30	26	12	12	9	41	15	14	33	29	15	24	39
HORVU1Hr1G018030	0	0	4	3	2	2	0	0	0	0	2	1	1	1	1	3
HORVU1Hr1G018040	2	4	3	15	10	9	0	10	7	5	8	9	8	8	4	10
HORVU1Hr1G018050	4	5	5	6	3	1	1	1	4	0	7	2	5	4	0	7
HORVU1Hr1G018060	1639	1617	1845	1600	1098	1172	881	812	1718	1424	1110	1202	1237	1232	818	1472
HORVU1Hr1G018080	201	143	294	327	165	128	117	91	274	172	200	268	198	192	148	299
HORVU1Hr1G018090	0	0	0	0	0	0	0	0	0	0	0	0	0	0	0	0
HORVU1Hr1G018100	0	0	1	1	0	0	0	0	1	0	0	0	1	0	0	0
HORVU1Hr1G018140	62	85	84	65	28	22	59	13	44	55	29	33	23	13	13	15
HORVU1Hr1G018150	127	337	610	542	254	170	125	108	332	237	261	337	229	161	194	216
HORVU1Hr1G018170	0	0	0	0	0	0	0	1	0	0	0	0	0	0	0	0
HORVU1Hr1G018180	0	4	1	2	2	0	0	1	0	0	0	0	0	0	0	0
HORVU1Hr1G018190	165	170	257	242	252	243	315	238	296	229	172	274	240	256	271	312
HORVU1Hr1G018200	1	6	8	6	7	6	14	16	2	1	15	7	9	7	5	6
HORVU1Hr1G018260	662	730	918	787	524	550	228	333	507	404	334	383	236	223	161	266
HORVU1Hr1G018290	0	5	8	6	16	7	0	7	3	0	3	9	10	2	9	7
HORVU1Hr1G018310	911	1078	1184	1051	954	802	386	584	881	791	698	779	824	681	482	1032
HORVU1Hr1G018340	100	121	94	119	81	103	62	69	89	70	91	115	123	95	47	135
HORVU1Hr1G018350	452	493	350	496	175	206	230	122	212	322	221	332	119	171	85	114
HORVU1Hr1G018360	167	176	116	69	57	44	28	8	181	120	86	57	53	54	12	15
HORVU1Hr1G018370	181	220	123	181	60	102	28	15	76	72	57	108	49	67	23	49
HORVU1Hr1G018380	12	17	41	23	10	10	8	8	10	18	9	26	9	12	9	22
HORVU1Hr1G018420	23	29	48	61	32	31	17	20	41	54	19	51	37	23	23	35
HORVU1Hr1G018430	0	0	0	0	0	0	0	0	0	0	0	0	0	0	0	0
HORVU1Hr1G018450	0	0	0	0	12	0	0	1	0	0	16	11	124	90	0	204
HORVU1Hr1G018480	1954	1515	1053	1906	1094	1021	708	826	1155	1500	1334	1097	644	671	369	469
HORVU1Hr1G018500	995	1100	1599	1387	851	878	1219	1144	915	684	777	1211	786	765	636	928
HORVU1Hr1G018530	1	2	1	2	0	0	0	0	0	0	1	0	0	0	0	0
HORVU1Hr1G018540	8371	9767	14277	10016	4433	5802	3172	4955	4510	3374	4461	5244	5533	3358	3712	4026
HORVU1Hr1G018590	2	0	0	1	1	2	0	0	1	2	0	0	0	0	0	2
HORVU1Hr1G018600	274	296	299	127	109	103	52	50	187	138	137	117	134	111	59	152
HORVU1Hr1G018610	263	278	267	120	103	99	49	44	158	129	125	104	120	100	55	136
HORVU1Hr1G018680	0	0	0	0	0	0	0	0	0	0	0	0	0	0	0	0
HORVU1Hr1G018700	4528	3602	3645	3437	1939	2107	1326	2109	3851	2256	1761	1857	1756	1525	1783	2020
HORVU1Hr1G018710	4459	3513	3500	3280	1789	2002	1218	1986	3707	2180	1684	1707	1623	1397	1721	1837
HORVU1Hr1G018720	3538	3250	6232	4219	3216	5363	2681	4832	1441	1042	1241	1266	2757	1511	1270	2393
HORVU1Hr1G018730	0	0	1	4	0	0	0	1	0	0	1	0	1	1	0	0
HORVU1Hr1G018740	1630	1864	2708	2691	2643	2173	1151	1520	2304	1585	1463	1967	2787	2031	1405	3280
HORVU1Hr1G018750	831	861	1102	1022	900	862	667	640	1188	919	903	974	976	907	660	1008
HORVU1Hr1G018770	29	27	54	38	26	45	39	24	55	44	40	29	29	32	9	14
HORVU1Hr1G018780	605	603	820	697	395	335	180	262	630	355	467	643	435	379	278	446
HORVU1Hr1G018790	611	668	858	816	770	717	514	519	899	551	570	913	822	664	536	1034
HORVU1Hr1G018840	19	43	34	30	17	10	14	19	29	15	22	23	21	15	15	20
HORVU1Hr1G018850	34	51	70	49	38	25	50	33	80	62	69	78	67	58	39	131
HORVU1Hr1G018870	0	3	2	1	3	1	4	0	3	1	2	0	1	0	0	1
HORVU1Hr1G018890	22	39	80	43	9	5	62	9	35	33	22	41	12	25	15	63
HORVU1Hr1G018930	201	293	462	517	334	281	241	237	351	247	366	476	225	258	217	283
HORVU1Hr1G019000	28	21	25	18	15	10	17	24	12	8	5	10	20	5	10	38
HORVU1Hr1G019140	0	0	0	0	0	0	0	0	0	0	0	0	0	0	0	0
HORVU1Hr1G019160	0	0	0	1	1	0	0	0	0	0	0	0	0	0	1	0
HORVU1Hr1G019220	0	4	9	6	5	3	0	3	5	2	1	11	4	1	3	2
HORVU1Hr1G019290	170	381	518	682	511	469	107	305	346	225	227	423	433	313	234	395
HORVU1Hr1G019320	983	1620	1745	1508	1358	1097	705	988	1413	1216	1160	1554	1923	1497	1185	2297
HORVU1Hr1G019330	1393	1787	2723	2416	1981	1904	674	1253	2200	1390	1383	2014	1807	1545	1360	1988
HORVU1Hr1G019340	277	373	458	382	268	263	195	241	343	238	274	433	262	238	211	286
HORVU1Hr1G019380	183	253	17	9	1	0	5	0	23	12	3	24	10	3	7	1
HORVU1Hr1G019390	1051	1078	1196	1128	861	709	453	497	1081	657	634	880	739	657	495	829
HORVU1Hr1G019410	1260	2444	226	135	7	17	32	7	186	93	24	68	141	87	125	40
HORVU1Hr1G019480	2	3	9	1	6	1	7	8	3	2	2	11	4	3	2	14
HORVU1Hr1G019490	2	0	0	2	1	1	0	0	1	2	0	2	0	3	3	0
HORVU1Hr1G019500	165	195	78	59	22	26	26	26	75	39	46	47	128	49	112	102
HORVU1Hr1G019510	4	1	5	5	5	1	0	1	2	2	4	13	1	3	2	5
HORVU1Hr1G019520	1	0	0	0	0	1	0	0	0	0	1	0	0	0	0	0
HORVU1Hr1G019530	109	312	377	172	24	49	55	41	12	6	42	48	23	12	6	9
HORVU1Hr1G019560	0	0	0	0	0	0	0	0	0	0	0	0	0	0	0	0
HORVU1Hr1G019570	548	824	938	786	443	375	160	289	661	313	272	671	599	395	402	689
HORVU1Hr1G019580	41	48	78	65	53	35	49	33	103	83	85	206	72	80	42	78
HORVU1Hr1G019590	2228	2384	3049	2679	2100	2036	797	1338	2511	1867	1334	1634	1419	1336	926	1404
HORVU1Hr1G019600	471	600	685	558	356	340	176	231	525	476	371	545	558	508	269	592
HORVU1Hr1G019630	47	70	40	70	64	57	33	20	37	37	45	61	64	59	17	73
HORVU1Hr1G019640	5	10	8	13	7	5	3	13	5	2	10	15	31	16	2	34
HORVU1Hr1G019650	451	484	578	697	417	453	379	400	491	383	516	772	474	465	322	609
HORVU1Hr1G019660	348	353	429	494	265	297	293	247	330	250	332	468	276	294	204	362
HORVU1Hr1G019670	72	137	162	145	66	68	24	54	96	87	69	117	48	30	40	48
HORVU1Hr1G019710	1	0	0	0	1	0	0	0	0	2	0	0	0	0	0	0
HORVU1Hr1G019740	42	659	3	0	0	0	0	0	1	1	0	1	0	1	2	1
HORVU1Hr1G019750	44	693	3	0	0	0	0	4	1	1	0	1	0	1	2	3
HORVU1Hr1G019770	232	446	206	105	36	42	28	301	86	18	47	203	222	151	227	492
HORVU1Hr1G019830	1	0	0	0	2	0	0	1	0	0	1	0	1	0	0	1
HORVU1Hr1G019870	25	37	65	70	63	42	14	24	58	17	56	63	42	49	29	58
HORVU1Hr1G019900	25	37	65	70	63	42	14	24	58	17	56	63	42	49	29	58
HORVU1Hr1G019930	0	1	6	0	1	0	0	1	0	0	0	0	1	0	0	0
HORVU1Hr1G019940	1	6	8	14	18	10	0	7	15	9	4	19	6	13	1	22
HORVU1Hr1G020000	1543	2149	3210	2032	1519	1521	1375	1881	1260	818	1312	1531	2727	1923	1197	4251
HORVU1Hr1G020010	30	58	60	52	18	18	8	10	38	27	23	31	23	22	16	10
HORVU1Hr1G020020	56	61	172	81	49	51	27	74	34	23	24	39	61	29	36	42
HORVU1Hr1G020030	0	0	0	0	0	0	0	0	0	0	0	0	0	0	0	0
HORVU1Hr1G020040	385	317	305	244	209	172	323	254	234	208	290	422	241	314	146	412
HORVU1Hr1G020050	114	112	95	72	51	61	96	88	62	83	65	119	79	119	57	144
HORVU1Hr1G020060	385	317	305	244	209	172	323	254	234	208	290	421	241	314	146	412
HORVU1Hr1G020070	114	112	95	72	51	61	96	88	62	83	65	119	79	119	57	144
HORVU1Hr1G020120	504	496	527	457	322	280	166	202	435	387	318	315	299	230	152	316
HORVU1Hr1G020140	24	45	8	2	61	0	29	14	5	17	106	40	298	245	23	594
HORVU1Hr1G020150	69	72	97	71	35	27	50	35	96	92	104	99	63	74	45	80
HORVU1Hr1G020160	0	3	5	5	3	9	4	2	3	3	8	5	5	2	1	5
HORVU1Hr1G020170	142	206	318	297	299	171	103	147	441	206	311	420	246	252	191	406
HORVU1Hr1G020190	22	35	75	63	40	26	12	36	47	50	52	59	55	38	36	107
HORVU1Hr1G020200	60	43	64	73	55	51	67	46	79	54	89	135	53	52	26	60
HORVU1Hr1G020240	3900	6092	12866	13069	6599	5329	3074	3904	11879	5968	5485	11225	7979	6559	5847	8609
HORVU1Hr1G020270	31	44	52	68	42	36	16	39	69	64	47	71	64	57	43	38
HORVU1Hr1G020300	159	159	192	196	135	145	90	99	172	96	128	188	126	153	88	131
HORVU1Hr1G020310	0	0	0	0	0	1	0	0	1	1	0	0	0	0	0	0
HORVU1Hr1G020330	90	152	157	126	35	31	54	28	73	66	41	90	65	51	43	100
HORVU1Hr1G020340	123	189	175	147	44	49	69	35	88	80	62	113	67	62	47	92
HORVU1Hr1G020360	2319	2743	3858	4794	4081	3312	2249	3057	4615	2846	3186	4607	3304	3030	2985	3724
HORVU1Hr1G020370	2	5	8	4	6	1	10	9	4	5	1	2	5	5	3	3
HORVU1Hr1G020380	0	1	0	0	0	2	1	0	0	0	0	0	0	0	0	0
HORVU1Hr1G020390	3321	4413	5259	5295	3884	3747	1522	2520	3739	2443	2314	3221	3148	2487	2071	2814
HORVU1Hr1G020400	3859	4599	5924	5715	4587	4235	2388	3122	4995	3467	3450	4755	4975	4467	3088	5535
HORVU1Hr1G020410	7473	4802	6023	7311	2936	7390	3316	10390	3805	1460	2745	3744	9688	5902	5622	8793
HORVU1Hr1G020420	219	208	139	282	238	215	235	311	209	257	275	234	256	195	133	352
HORVU1Hr1G020430	6590	4303	5450	6667	2649	6715	3062	9391	3387	1249	2409	3371	8944	5439	5140	8011
HORVU1Hr1G020450	14717	10860	11542	12351	6518	11589	4397	12799	7848	4660	6829	8157	11456	8769	7422	11140
HORVU1Hr1G020460	0	0	1	0	1	0	5	0	4	0	0	0	0	0	0	0
HORVU1Hr1G020470	148	244	374	421	360	293	111	201	336	174	194	406	270	202	150	289
HORVU1Hr1G020480	252	302	344	347	322	333	207	194	354	273	247	246	291	317	207	439
HORVU1Hr1G020490	310	324	392	384	364	353	229	206	397	307	287	270	317	355	217	486
HORVU1Hr1G020500	740	1083	1194	1145	745	708	341	593	943	782	688	697	514	458	362	489
HORVU1Hr1G020520	0	0	0	0	0	0	0	0	0	0	2	0	0	1	0	0
HORVU1Hr1G020530	2255	2307	2749	2502	2037	1971	1358	1122	2477	1940	1907	2322	1815	1863	1393	2154
HORVU1Hr1G020550	0	0	0	0	0	0	1	0	0	0	0	0	0	0	0	0
HORVU1Hr1G020560	12	14	0	1	0	0	0	0	2	0	0	1	0	1	0	0
HORVU1Hr1G020570	0	1	1	0	1	1	0	0	1	0	0	0	0	1	0	0
HORVU1Hr1G020580	0	0	0	0	0	0	0	0	0	0	0	0	0	0	0	0
HORVU1Hr1G020590	0	2	1	0	1	1	0	0	2	0	4	0	1	1	1	0
HORVU1Hr1G020600	2	1	1	1	0	3	0	0	1	0	1	1	1	0	0	1
HORVU1Hr1G020620	397	492	636	801	609	661	201	266	732	469	505	690	537	523	385	532
HORVU1Hr1G020650	127	358	445	327	245	220	70	197	155	81	108	173	201	131	131	221
HORVU1Hr1G020660	0	0	2	0	0	0	0	0	0	2	0	0	1	0	0	1
HORVU1Hr1G020670	0	0	0	0	0	0	0	0	0	0	0	0	0	0	0	0
HORVU1Hr1G020690	108	15	19	81	1081	707	1319	259	583	191	165	326	967	317	265	485
HORVU1Hr1G020710	3	0	6	9	10	3	3	5	16	5	9	8	8	7	0	5
HORVU1Hr1G020720	11	7	6	6	14	6	5	5	23	18	34	9	11	12	14	5
HORVU1Hr1G020760	0	0	0	0	0	0	0	0	0	0	0	0	0	0	0	0
HORVU1Hr1G020790	2	5	9	15	11	5	2	4	9	1	3	11	8	4	3	12
HORVU1Hr1G020800	0	0	1	0	0	0	0	0	0	0	0	0	0	0	0	0
HORVU1Hr1G021000	135	245	555	669	660	470	119	243	719	273	263	553	420	268	303	333
HORVU1Hr1G021040	0	0	0	0	0	0	0	0	0	0	0	0	0	0	0	0
HORVU1Hr1G021070	0	4	0	0	0	0	0	0	0	0	0	0	0	0	0	1
HORVU1Hr1G021100	1	3	1	1	1	1	0	0	3	1	0	1	1	0	0	1
HORVU1Hr1G021120	1215	1460	1822	1716	1060	1029	423	653	1235	852	966	1424	1138	943	770	1377
HORVU1Hr1G021130	1689	1904	2228	2103	1376	1297	1237	1238	1786	1614	1717	2085	1534	1579	1151	1874
HORVU1Hr1G021140	139	551	50	5	6	4	4	1	31	27	10	11	12	11	10	5
HORVU1Hr1G021150	166	254	149	29	34	32	57	39	71	44	30	19	36	20	27	14
HORVU1Hr1G021160	256	296	178	110	98	80	53	56	137	96	73	80	102	77	84	35
HORVU1Hr1G021170	19	34	1	3	1	2	5	2	5	5	9	11	11	5	4	7
HORVU1Hr1G021180	15	54	0	0	0	0	0	0	0	0	0	0	0	0	1	0
HORVU1Hr1G021190	1128	1351	1781	1813	1559	1237	589	983	1477	1008	1201	1716	1615	1282	1047	1804
HORVU1Hr1G021230	317	385	609	604	468	419	151	269	389	288	301	401	338	280	191	476
HORVU1Hr1G021250	8	13	28	19	10	6	8	3	22	10	18	36	19	21	20	21
HORVU1Hr1G021340	15	20	28	30	23	14	3	6	10	13	22	13	27	17	8	37
HORVU1Hr1G021390	816	1776	3829	3037	2473	1752	587	1474	2576	1303	1531	2935	1692	1414	1535	2209
HORVU1Hr1G021410	1	0	1	1	1	0	2	0	3	0	0	0	2	2	4	4
HORVU1Hr1G021490	27	16	27	30	12	16	6	8	13	14	19	18	8	15	6	12
HORVU1Hr1G021530	440	775	940	672	703	510	462	485	756	727	726	1005	728	593	585	973
HORVU1Hr1G021540	1891	2219	3142	3441	2611	2310	1165	1872	2494	1765	1600	2699	2368	2000	1598	2437
HORVU1Hr1G021550	1011	1256	1579	1043	1080	918	565	649	1529	1135	869	989	1336	1170	639	1465
HORVU1Hr1G021560	187	267	447	533	531	395	170	271	357	250	274	469	481	329	316	557
HORVU1Hr1G021590	1	14	17	9	6	1	0	4	4	2	11	6	33	1	0	7
HORVU1Hr1G021600	307	444	575	814	626	445	377	308	912	645	536	900	472	518	372	689
HORVU1Hr1G021620	82	162	148	203	189	138	130	98	135	121	128	163	73	90	55	62
HORVU1Hr1G021630	0	2	0	0	0	0	0	0	0	0	0	1	0	0	3	0
HORVU1Hr1G021640	1	0	0	0	0	0	0	0	0	0	0	0	0	0	0	0
HORVU1Hr1G021650	2	3	4	0	8	1	0	1	1	1	1	3	111	26	0	37
HORVU1Hr1G021660	0	0	0	0	0	0	0	0	0	0	0	0	0	0	0	1
HORVU1Hr1G021680	15	9	15	8	2	5	2	2	728	581	369	236	79	285	26	8
HORVU1Hr1G021690	2668	2596	2655	2491	1977	2096	1780	1525	2577	2071	1812	2061	1696	1876	1214	2103
HORVU1Hr1G021700	738	730	856	807	490	450	397	465	593	465	547	762	450	451	394	636
HORVU1Hr1G021710	2	0	0	0	0	0	0	0	1	0	0	0	1	6	2	3
HORVU1Hr1G021720	12003	11625	11276	10731	6634	7523	6219	5844	8711	7920	6829	9255	9618	8359	5163	12679
HORVU1Hr1G021730	3	1	0	0	0	0	0	0	0	0	0	0	0	0	0	0
HORVU1Hr1G021740	0	0	0	0	0	0	0	0	0	0	0	0	0	0	0	0
HORVU1Hr1G021750	0	7	9	1	1	3	11	3	2	3	3	4	4	4	4	3
HORVU1Hr1G021760	491	475	726	799	386	390	150	236	558	331	254	367	327	260	234	186
HORVU1Hr1G021780	5333	4597	6050	6518	2788	3019	2793	4773	3062	2685	3543	4473	2874	4009	2510	5074
HORVU1Hr1G021790	3	5	6	3	0	1	2	0	0	3	0	1	0	4	1	3
HORVU1Hr1G021800	503	542	784	770	893	743	692	572	885	674	692	740	788	797	532	1049
HORVU1Hr1G021810	0	1	0	0	2	3	0	0	0	3	0	0	0	0	1	0
HORVU1Hr1G021830	13	17	37	15	15	10	14	19	20	12	29	21	9	15	7	17
HORVU1Hr1G021840	3007	6040	8764	7431	5955	5996	2379	4025	4932	3394	3594	4618	5829	4338	4282	7239
HORVU1Hr1G021880	0	0	0	0	0	0	0	0	0	0	0	0	0	0	0	0
HORVU1Hr1G021890	341	373	517	345	225	183	108	129	307	201	206	274	212	199	115	240
HORVU1Hr1G021900	517	502	808	919	792	726	517	508	993	756	707	918	732	724	516	925
HORVU1Hr1G021920	0	1	0	0	0	0	0	0	0	0	0	0	1	0	0	0
HORVU1Hr1G021930	65	62	65	39	96	69	47	49	69	77	139	61	452	241	61	618
HORVU1Hr1G021990	88	268	549	525	507	361	125	280	502	278	298	744	507	386	433	686
HORVU1Hr1G022000	2	0	0	0	0	1	4	0	0	1	1	6	1	0	4	3
HORVU1Hr1G022010	2	3	0	0	3	0	0	0	0	0	1	0	1	0	1	1
HORVU1Hr1G022020	32	113	10	10	5	3	13	2	0	0	5	3	1	5	4	2
HORVU1Hr1G022040	0	0	0	0	0	0	0	0	0	0	0	0	0	0	0	0
HORVU1Hr1G022050	37	35	38	28	20	9	8	13	22	16	16	32	10	15	12	20
HORVU1Hr1G022060	20	77	46	13	5	0	2	23	50	43	26	67	80	67	56	156
HORVU1Hr1G022070	3	2	2	0	3	1	0	0	2	5	2	1	3	1	1	6
HORVU1Hr1G022080	0	0	0	0	0	0	0	1	0	0	0	0	0	0	0	0
HORVU1Hr1G022100	245	361	444	455	480	378	230	218	591	431	379	460	489	418	232	553
HORVU1Hr1G022110	28	25	22	11	20	26	24	30	37	35	27	29	16	32	30	35
HORVU1Hr1G022130	2958	3634	4069	3480	3012	3007	2008	2197	2949	2393	2065	2386	2224	2050	1723	2287
HORVU1Hr1G022150	0	0	2	1	0	1	0	0	0	0	0	0	0	1	0	0
HORVU1Hr1G022170	18	17	19	37	35	19	18	23	23	25	26	36	64	43	24	96
HORVU1Hr1G022180	41	30	28	40	32	26	47	13	90	78	52	65	36	43	55	51
HORVU1Hr1G022190	295	325	428	454	463	310	251	269	612	448	427	587	491	511	347	727
HORVU1Hr1G022250	1827	2155	2823	2522	1958	1768	1482	1696	2475	1923	2001	2585	2941	2438	1756	3812
HORVU1Hr1G022270	169	361	439	465	383	315	164	246	348	211	287	455	564	365	277	681
HORVU1Hr1G022290	39	51	49	41	59	41	82	56	43	43	52	58	122	74	35	150
HORVU1Hr1G022310	336	607	904	937	741	620	268	427	807	547	534	1041	823	558	523	974
HORVU1Hr1G022370	1383	2141	2300	1727	1266	1457	773	1228	1576	1150	945	1148	1400	1048	984	1536
HORVU1Hr1G022380	238	367	193	79	140	96	73	154	148	201	172	209	173	78	57	150
HORVU1Hr1G022390	101	63	69	50	50	34	79	57	51	63	61	92	41	73	29	85
HORVU1Hr1G022400	26	37	27	27	6	11	9	14	12	21	12	22	17	20	7	24
HORVU1Hr1G022410	97	132	135	157	81	96	85	70	147	98	115	173	97	118	75	149
HORVU1Hr1G022420	704	759	834	858	656	628	445	396	830	598	579	739	595	631	436	757
HORVU1Hr1G022430	58	108	27	20	22	19	2	4	239	157	97	92	75	112	75	69
HORVU1Hr1G022450	38	48	108	131	255	103	68	65	149	89	154	251	206	149	99	274
HORVU1Hr1G022460	6	10	11	20	13	6	7	3	10	14	13	13	9	10	2	15
HORVU1Hr1G022470	8	17	16	28	16	14	15	13	15	38	16	13	22	9	7	15
HORVU1Hr1G022500	2	0	1	0	1	0	0	1	2	1	2	0	2	0	2	0
HORVU1Hr1G022510	0	1	1	1	2	0	0	0	2	1	0	0	0	3	2	1
HORVU1Hr1G022530	20	40	62	79	94	47	79	66	92	103	79	119	126	93	74	210
HORVU1Hr1G022540	0	0	1	0	0	0	0	0	0	0	1	1	0	0	0	0
HORVU1Hr1G022550	2352	2455	3205	1824	2908	3312	2028	2740	2386	1718	1158	1826	1574	1743	1407	1582
HORVU1Hr1G022570	6954	6748	6593	5757	3569	4210	4241	3454	5754	5519	4631	5280	5034	4980	3080	6702
HORVU1Hr1G022620	53	66	100	135	131	112	90	69	131	71	83	119	108	98	64	128
HORVU1Hr1G022630	0	0	0	0	1	0	1	6	0	1	0	1	1	0	0	2
HORVU1Hr1G022660	4818	5025	4924	4604	3478	3625	5266	3383	3993	3896	4294	4158	2367	2669	2226	2736
HORVU1Hr1G022670	0	0	0	1	0	0	0	0	0	0	1	0	1	0	0	1
HORVU1Hr1G022680	0	0	0	0	0	0	0	0	0	0	0	0	0	0	0	0
HORVU1Hr1G022700	1279	1575	2071	1324	1067	854	1116	881	1117	907	1045	1196	1256	1169	636	1879
HORVU1Hr1G022710	1146	1406	1908	1206	969	757	1057	785	1020	839	968	1077	1173	1117	610	1806
HORVU1Hr1G022720	271	314	294	253	170	186	98	131	188	161	177	265	151	128	80	129
HORVU1Hr1G022750	4746	6789	7244	7395	5522	5463	2972	4352	6335	4794	4538	5366	5132	4435	3510	5755
HORVU1Hr1G022780	73	158	107	66	61	54	22	35	25	26	53	32	111	52	17	90
HORVU1Hr1G022790	59	94	103	93	158	51	44	61	272	205	235	315	266	284	177	558
HORVU1Hr1G022800	237	181	233	266	283	260	344	220	432	356	357	387	353	470	299	571
HORVU1Hr1G022810	6604	6519	7090	5213	2814	2789	1354	1483	3812	3145	2633	3482	2981	2232	1994	2303
HORVU1Hr1G022830	1	1	2	5	8	6	0	1	8	0	0	9	4	1	2	3
HORVU1Hr1G022840	2166	1706	2353	2626	2896	3955	3890	5773	2005	1653	2645	2610	3294	2269	2312	3085
HORVU1Hr1G022870	35	48	45	67	70	42	42	30	57	65	35	40	40	51	28	83
HORVU1Hr1G022880	0	1	0	0	3	0	0	0	1	0	0	1	0	0	0	2
HORVU1Hr1G022900	0	2	0	2	6	2	0	0	2	4	1	4	32	1	3	6
HORVU1Hr1G022990	1658	1456	1714	1516	659	710	742	728	1080	743	854	1328	887	867	706	933
HORVU1Hr1G023010	1	3	1	0	1	0	0	0	1	0	0	0	1	0	0	0
HORVU1Hr1G023030	245	597	1176	1097	863	583	257	502	826	471	594	1029	906	668	561	1042
HORVU1Hr1G023060	2512	2901	3957	3446	2679	2836	1329	1918	2373	1537	1686	2107	2241	1712	1371	2469
HORVU1Hr1G023070	915	1433	2947	2881	2835	1901	990	1541	2578	1516	1848	3173	2801	2277	1862	3765
HORVU1Hr1G023100	2	0	1	0	1	3	1	0	0	1	2	3	2	1	1	0
HORVU1Hr1G023120	0	0	1	0	0	0	0	0	0	1	1	0	0	1	0	0
HORVU1Hr1G023130	4	9	3	7	4	2	2	6	2	5	16	5	7	9	1	9
HORVU1Hr1G023160	97	68	88	113	173	93	173	209	164	98	125	152	187	122	129	244
HORVU1Hr1G023170	0	2	0	1	1	0	0	0	0	0	0	0	0	0	0	0
HORVU1Hr1G023180	0	0	0	0	0	0	0	0	0	0	0	0	0	0	0	0
HORVU1Hr1G023190	29	25	13	16	16	20	6	11	16	8	17	11	12	17	5	17
HORVU1Hr1G023220	1550	1143	1013	1632	1923	1701	2392	1381	4556	3944	2214	2318	1983	2137	1708	1520
HORVU1Hr1G023250	9	9	17	12	14	7	0	13	6	2	6	9	9	5	10	9
HORVU1Hr1G023260	5656	5442	5913	5639	3408	3265	2738	2372	3846	3487	3291	3869	3023	3023	1901	4011
HORVU1Hr1G023270	4931	4822	5209	4896	2971	2787	2417	2086	3483	3046	2904	3452	2669	2699	1720	3578
HORVU1Hr1G023280	29	25	13	16	16	20	6	11	17	8	17	11	12	17	5	17
HORVU1Hr1G023320	1213	1692	2012	1481	952	970	615	859	901	656	681	960	1047	887	536	1450
HORVU1Hr1G023330	0	2	0	0	0	0	0	0	0	0	0	0	0	1	0	1
HORVU1Hr1G023350	73	99	162	190	230	190	76	155	154	115	156	218	258	151	114	310
HORVU1Hr1G023460	0	1	3	12	23	16	2	3	36	27	34	22	28	33	21	25
HORVU1Hr1G023480	1486	2613	3199	3190	2183	1741	861	1412	2131	1443	1509	2748	2195	1627	1319	2799
HORVU1Hr1G023500	2493	2461	2843	2053	1367	1355	806	871	1938	1270	1274	1727	1848	1447	942	1885
HORVU1Hr1G023510	2525	2498	2405	1296	1043	1021	304	634	1371	1028	1071	1150	1491	936	776	1264
HORVU1Hr1G023520	173	140	205	94	470	76	96	245	80	98	592	314	2372	1354	182	3298
HORVU1Hr1G023620	0	3	1	0	0	1	0	0	0	0	0	2	0	2	0	0
HORVU1Hr1G023630	2440	3171	3533	3034	2045	1890	1441	1616	1592	1386	1603	2020	2029	1753	1210	2939
HORVU1Hr1G023650	2567	2399	2542	1055	1437	1682	2808	2527	2664	4368	3997	1435	1384	2358	1321	4089
HORVU1Hr1G023660	3731	3959	4441	3592	2171	2375	2053	1900	2821	2769	2416	3178	3096	2528	1652	3960
HORVU1Hr1G023670	1152	1203	1308	1542	1164	1016	729	801	1144	1000	891	1095	1002	874	613	1258
HORVU1Hr1G023690	521	825	1211	1102	855	786	896	1078	749	558	878	1024	948	807	710	1109
HORVU1Hr1G023710	2	35	75	91	91	46	1	56	36	14	52	85	68	28	57	93
HORVU1Hr1G023720	2	10	14	7	10	9	0	6	7	9	7	7	8	2	6	9
HORVU1Hr1G023730	113	220	282	344	230	264	106	175	249	152	158	265	246	195	180	297
HORVU1Hr1G023740	0	0	0	1	0	0	0	0	0	0	0	0	1	0	0	1
HORVU1Hr1G023750	1	1	0	1	1889	0	0	0	73	38	570	547	368	107	300	210
HORVU1Hr1G023820	31	33	40	26	18	19	7	20	15	17	17	8	20	19	11	13
HORVU1Hr1G023830	0	9	8	6	4	3	1	8	7	7	1	7	2	9	2	8
HORVU1Hr1G023840	0	0	0	0	0	0	0	0	0	0	0	0	0	0	0	0
HORVU1Hr1G023860	63	74	70	79	40	55	32	26	77	61	34	68	48	63	37	52
HORVU1Hr1G023870	1	3	4	2	1	0	7	4	1	2	5	6	3	2	1	9
HORVU1Hr1G023940	39	53	73	49	46	35	37	65	80	56	88	49	39	53	25	88
HORVU1Hr1G023960	7	31	102	186	174	143	3	60	192	61	40	61	69	32	30	31
HORVU1Hr1G024000	92	157	228	234	191	155	115	114	227	105	137	226	180	163	123	220
HORVU1Hr1G024040	12	17	18	19	16	13	15	9	3	11	8	11	7	4	6	10
HORVU1Hr1G024050	0	0	0	0	0	0	0	0	0	0	0	0	0	0	0	0
HORVU1Hr1G024060	213	224	317	246	184	152	171	135	355	346	347	373	241	251	189	270
HORVU1Hr1G024070	518	541	776	1253	1229	1417	782	1348	846	620	624	682	833	769	707	1155
HORVU1Hr1G024090	274	253	316	301	185	154	113	140	323	210	205	287	171	200	149	240
HORVU1Hr1G024100	110	135	155	159	157	149	92	84	205	183	147	188	130	147	117	158
HORVU1Hr1G024140	677	631	820	742	652	649	306	352	800	453	409	532	468	482	254	544
HORVU1Hr1G024150	87	114	139	135	101	69	33	79	96	67	70	104	109	87	61	129
HORVU1Hr1G024170	4263	5196	6612	6131	3907	4126	1936	2764	3882	2854	2989	4176	3435	3334	2404	4037
HORVU1Hr1G024180	0	1	3	0	255	6	260	176	15	13	221	269	755	2360	32	3990
HORVU1Hr1G024190	1632	2224	2891	2405	2131	1562	772	1298	1943	1373	1393	2723	1737	1289	1091	2328
HORVU1Hr1G024210	684	675	799	703	646	624	349	403	808	531	453	543	489	491	289	520
HORVU1Hr1G024220	191	260	288	258	222	169	87	116	234	185	165	272	219	191	124	279
HORVU1Hr1G024240	2863	4167	4804	4164	3112	2626	1123	1570	3411	2700	2518	3209	2736	2507	1739	3217
HORVU1Hr1G024280	5	22	19	2	9	0	0	0	1	3	2	9	0	2	2	2
HORVU1Hr1G024290	5	0	2	8	1	4	0	1	2	3	10	6	7	4	3	12
HORVU1Hr1G024300	0	0	2	0	1	0	0	0	2	0	0	0	0	1	1	0
HORVU1Hr1G024390	1125	970	1101	1021	676	591	340	472	1484	1008	745	693	664	715	559	717
HORVU1Hr1G024400	10396	13691	20878	20321	14651	16007	10979	16611	11427	7571	8059	14101	9634	9394	10029	7814
HORVU1Hr1G024420	233	306	553	568	377	225	252	223	627	471	463	672	385	438	293	659
HORVU1Hr1G024440	0	0	0	0	0	0	0	0	0	0	0	0	0	0	0	0
HORVU1Hr1G024460	25	39	45	34	39	23	20	10	50	43	25	36	40	35	29	38
HORVU1Hr1G024490	0	0	0	0	0	0	0	1	0	0	0	0	0	0	0	1
HORVU1Hr1G024510	262	203	280	296	257	253	212	208	296	220	188	333	284	259	181	384
HORVU1Hr1G024540	110	153	132	109	137	80	67	94	235	304	274	181	239	256	63	534
HORVU1Hr1G024550	253	282	308	345	273	228	139	194	273	239	228	323	274	239	212	380
HORVU1Hr1G024580	4083	3752	5072	5193	3279	4132	2120	3028	2725	1767	1579	2400	1789	1796	1438	1603
HORVU1Hr1G024620	0	0	3	4	5	1	1	6	3	3	2	5	1	4	4	4
HORVU1Hr1G024640	266	239	311	410	939	438	474	432	1151	1155	1714	1419	1094	1321	865	2099
HORVU1Hr1G024660	433	400	561	567	509	327	237	240	478	275	286	477	769	425	267	706
HORVU1Hr1G024670	728	701	963	953	733	539	319	373	755	400	439	759	1037	627	415	979
HORVU1Hr1G024700	1765	1514	1907	1692	1042	1170	1374	1035	1439	1098	1156	1224	1348	1328	1148	1497
HORVU1Hr1G024710	10885	13758	14481	9282	5569	5861	4675	5992	7412	6934	5928	7234	7660	6440	3921	9155
HORVU1Hr1G024740	2584	2083	2769	2537	1554	1530	800	920	1946	1389	1202	1234	1186	1086	910	1100
HORVU1Hr1G024750	21	8	7	9	10	5	6	5	9	2	5	3	5	5	1	4
HORVU1Hr1G024770	20	8	7	9	12	5	5	6	10	3	5	5	3	5	1	5
HORVU1Hr1G024800	0	0	0	0	0	0	0	0	0	0	0	0	0	0	0	0
HORVU1Hr1G024810	882	714	993	974	830	794	644	563	1162	913	769	979	759	912	615	993
HORVU1Hr1G024860	10	3	3	22	9	29	55	52	10	5	16	8	28	17	12	23
HORVU1Hr1G024870	1872	1743	2581	3205	927	1317	1162	1523	4444	2529	2025	3793	1883	1868	2431	2275
HORVU1Hr1G024880	17	9	7	8	10	11	12	5	5	5	15	8	6	10	5	12
HORVU1Hr1G024890	2233	2026	2478	2468	1834	2716	2211	2198	1597	1327	1376	1837	1135	1214	1200	1027
HORVU1Hr1G024900	1	1	7	0	0	0	0	1	0	2	4	0	0	2	4	0
HORVU1Hr1G024990	0	0	1	5	0	0	0	1	0	0	0	1	4	0	0	2
HORVU1Hr1G025010	19	25	93	55	44	30	3	20	50	20	30	53	23	21	35	36
HORVU1Hr1G025020	190	293	267	223	123	148	69	121	365	500	379	506	227	222	164	244
HORVU1Hr1G025030	0	2	1	0	9	0	3	4	0	0	14	9	63	30	3	91
HORVU1Hr1G025040	0	0	3	2	0	1	1	0	1	1	1	0	5	1	1	0
HORVU1Hr1G025060	2814	4210	5652	2734	2615	3789	5948	5256	5687	5375	5653	4257	3019	4440	1983	6963
HORVU1Hr1G025070	0	2	4	2	0	0	3	0	1	1	6	4	2	2	1	4
HORVU1Hr1G025080	2	2	1	1	2	3	0	1	1	4	1	4	0	1	0	3
HORVU1Hr1G025090	2411	3607	4704	2349	2296	3546	5727	4993	4935	4716	4954	3696	2642	3876	1695	6229
HORVU1Hr1G025100	22	20	61	24	16	7	21	22	34	43	56	34	26	38	21	51
HORVU1Hr1G025110	11	46	70	22	8	7	3	4	13	5	12	19	13	11	5	24
HORVU1Hr1G025120	103	148	223	79	73	45	37	59	127	117	168	85	80	126	51	255
HORVU1Hr1G025150	23	15	19	13	11	9	4	4	22	15	18	16	11	13	10	8
HORVU1Hr1G025160	84	154	266	300	231	122	76	93	176	134	163	266	210	125	153	219
HORVU1Hr1G025190	0	4	3	6	5	1	3	3	7	0	2	5	1	0	2	4
HORVU1Hr1G025200	0	4	3	4	4	2	0	1	1	4	1	1	1	0	0	5
HORVU1Hr1G025250	5	7	23	8	71	6	4	10	4	4	20	0	235	60	2	122
HORVU1Hr1G025280	1	2	3	6	3	3	1	6	6	0	2	2	3	1	2	0
HORVU1Hr1G025300	7	8	12	12	7	14	4	5	15	7	2	9	4	3	7	5
HORVU1Hr1G025340	2594	2879	4294	3026	1731	1947	1832	1816	2280	1713	1665	2233	1551	1528	1365	1393
HORVU1Hr1G025360	456	554	759	776	533	494	332	360	577	454	443	527	460	435	283	506
HORVU1Hr1G025370	886	974	1614	2288	628	703	800	871	637	372	524	861	380	364	277	306
HORVU1Hr1G025380	0	0	1	0	0	0	4	0	1	0	0	1	0	0	0	0
HORVU1Hr1G025390	1184	1442	2488	3665	1152	1428	1081	1761	1010	544	824	1177	733	573	461	446
HORVU1Hr1G025440	172	174	127	132	162	123	183	144	216	194	283	279	170	185	76	295
HORVU1Hr1G025450	129	145	206	247	199	179	205	158	236	190	198	244	238	201	159	300
HORVU1Hr1G025470	37	44	63	77	75	50	44	44	117	54	66	96	80	56	42	97
HORVU1Hr1G025480	209	204	260	251	171	141	129	154	129	138	185	217	155	133	65	239
HORVU1Hr1G025500	8	2	2	4	1	0	5	1	10	3	4	4	3	5	3	2
HORVU1Hr1G025530	891	1042	1101	430	508	280	27	208	167	101	470	260	191	152	58	176
HORVU1Hr1G025560	0	0	0	0	0	0	0	0	0	0	0	0	0	0	0	0
HORVU1Hr1G025570	32	50	41	10	32	24	1	6	4	2	8	41	7	8	7	9
HORVU1Hr1G025580	1	2	1	2	2	0	0	0	1	1	0	0	1	0	0	1
HORVU1Hr1G025600	482	715	925	751	577	535	285	370	577	364	332	523	480	393	325	525
HORVU1Hr1G025660	400	439	641	486	508	432	466	437	507	462	491	555	541	567	423	856
HORVU1Hr1G025670	2516	1901	1969	1787	2297	1287	1137	1094	2243	1869	3033	2142	2143	1846	1127	2932
HORVU1Hr1G025690	484	575	661	686	1042	779	874	827	723	631	1041	1048	1672	1051	629	2460
HORVU1Hr1G025710	0	0	0	0	1	0	0	2	0	0	1	1	10	0	0	1
HORVU1Hr1G025810	1	0	0	0	0	0	0	0	0	0	0	0	0	0	0	0
HORVU1Hr1G025830	3	7	3	0	0	1	2	1	2	2	4	2	2	3	2	8
HORVU1Hr1G025840	0	0	0	0	0	0	0	0	0	0	0	0	0	0	0	0
HORVU1Hr1G025850	0	1	0	0	0	0	0	0	0	0	0	0	0	0	0	0
HORVU1Hr1G025860	0	0	0	0	0	0	0	0	0	0	0	0	0	0	0	0
HORVU1Hr1G025870	68	191	121	37	65	45	44	54	42	45	63	52	72	47	48	137
HORVU1Hr1G025890	14	12	13	4	59	4	13	11	5	8	9	72	89	47	8	134
HORVU1Hr1G025910	21	50	89	63	47	22	29	46	53	63	67	127	54	42	38	81
HORVU1Hr1G025940	70	58	115	113	126	49	47	27	205	164	249	234	280	257	162	407
HORVU1Hr1G025960	0	4	1	12	1	5	3	1	1	2	0	1	0	0	0	0
HORVU1Hr1G025970	21	19	20	23	17	15	6	21	41	33	25	18	13	22	20	11
HORVU1Hr1G026020	0	0	0	0	1	0	0	0	0	2	1	0	0	0	0	0
HORVU1Hr1G026040	3	12	10	4	7	7	9	9	8	4	3	4	5	2	3	7
HORVU1Hr1G026060	0	0	0	0	0	0	0	0	0	0	0	0	0	0	0	0
HORVU1Hr1G026100	194	197	168	213	120	163	70	163	272	113	67	190	393	563	274	549
HORVU1Hr1G026110	0	3	0	0	0	0	0	0	1	0	0	0	0	2	0	1
HORVU1Hr1G026130	158	163	165	144	128	112	156	78	130	141	135	195	177	149	76	208
HORVU1Hr1G026140	166	166	206	171	131	106	118	76	178	145	142	209	164	167	95	278
HORVU1Hr1G026150	2	3	0	4	6	1	4	2	6	1	1	7	3	0	3	1
HORVU1Hr1G026180	0	2	0	0	0	0	0	1	1	0	0	0	0	0	0	1
HORVU1Hr1G026240	0	4	0	0	0	0	0	1	0	0	0	0	1	0	0	1
HORVU1Hr1G026250	11	28	52	65	52	44	16	29	74	44	39	74	50	35	46	47
HORVU1Hr1G026280	7	5	8	7	15	1	4	3	4	16	5	4	11	2	9	9
HORVU1Hr1G026320	634	1226	1526	1664	3095	1781	821	2428	1080	777	1387	2090	5465	2795	1300	7860
HORVU1Hr1G026330	248	277	500	356	773	292	463	521	537	489	592	642	1485	1142	391	2677
HORVU1Hr1G026400	115	87	86	91	69	108	55	69	127	104	84	82	60	56	49	34
HORVU1Hr1G026430	473	661	707	769	682	698	377	349	552	452	394	505	450	441	260	659
HORVU1Hr1G026480	710	430	475	857	695	694	306	299	879	593	420	517	302	302	302	208
HORVU1Hr1G026510	44	31	27	13	6	6	15	4	13	13	11	5	12	8	3	11
HORVU1Hr1G026520	1715	1102	1103	356	237	211	182	231	807	579	701	844	1291	641	536	1330
HORVU1Hr1G026530	53	71	60	33	158	127	97	52	28	42	22	30	89	124	29	173
HORVU1Hr1G026570	0	0	0	0	0	0	0	0	0	0	0	0	0	0	0	0
HORVU1Hr1G026580	198	186	238	262	200	194	133	154	275	197	229	305	163	232	124	289
HORVU1Hr1G026590	1980	1889	2288	2731	1882	2048	1084	1069	1683	1247	873	993	1005	1210	873	818
HORVU1Hr1G026620	21	17	27	36	19	15	14	21	21	24	10	38	17	15	11	23
HORVU1Hr1G026630	0	0	0	0	2	0	0	2	1	0	3	3	1	1	0	0
HORVU1Hr1G026650	1163	906	959	781	802	992	1260	1298	487	419	677	643	749	523	472	797
HORVU1Hr1G026680	2	3	2	5	1	3	1	7	2	5	2	6	2	3	0	5
HORVU1Hr1G026740	0	0	0	0	0	0	0	0	0	0	0	0	0	0	0	0
HORVU1Hr1G026750	643	884	1288	1424	1139	961	267	497	1476	740	669	987	1267	978	638	1656
HORVU1Hr1G026780	1690	1679	1300	2549	2160	2490	751	902	1581	866	588	617	670	765	387	516
HORVU1Hr1G026800	329	349	386	334	369	304	415	285	360	376	442	377	367	403	274	506
HORVU1Hr1G026820	4	11	11	8	7	11	8	9	4	8	5	4	9	3	2	7
HORVU1Hr1G026840	706	1147	3984	2478	755	652	659	817	660	670	1072	1999	742	658	532	809
HORVU1Hr1G026850	19	31	36	63	22	13	1	24	28	23	25	51	35	13	30	47
HORVU1Hr1G026860	136	121	143	52	83	100	172	137	190	226	241	67	69	148	86	248
HORVU1Hr1G026870	709	1110	1259	602	576	555	816	1196	1147	1202	1543	742	622	1019	536	2439
HORVU1Hr1G026880	2	5	3	3	3	1	0	2	2	2	1	2	3	3	1	3
HORVU1Hr1G026900	1583	1874	2041	946	1454	1304	1618	1907	1810	2438	3134	1466	1853	2748	1287	5064
HORVU1Hr1G026920	282378	288129	357885	150125	173566	192691	316949	310241	349182	433341	501113	215269	227078	362447	183162	727960
HORVU1Hr1G026940	185826	186351	230697	95076	105201	122066	210908	205321	227557	289196	328101	135108	134489	225048	114286	456221
HORVU1Hr1G026960	5310	4975	6101	2289	2462	3432	5661	4725	5818	9213	9513	3260	3258	5623	3529	12075
HORVU1Hr1G026990	53281	51352	61444	26785	34700	37934	56838	53384	60968	79992	90574	39110	44062	68250	34363	133313
HORVU1Hr1G027000	218517	225140	277449	118618	142499	152615	241220	243790	267414	331290	387068	172551	189299	293159	147086	581089
HORVU1Hr1G027010	253	345	401	133	157	206	313	370	358	467	490	206	213	342	179	814
HORVU1Hr1G027020	520	425	573	206	187	357	975	432	559	607	608	272	214	401	112	785
HORVU1Hr1G027070	6329	6541	8233	3495	4606	4304	5937	6000	6748	10002	10432	5513	7201	9426	5453	19933
HORVU1Hr1G027080	1229	1582	1917	753	1279	1176	1371	1620	1692	2258	2636	1110	1440	2028	1219	3970
HORVU1Hr1G027090	3672	3784	3620	1488	1767	2253	2811	4633	3790	5694	7228	2338	2391	4042	1992	8227
HORVU1Hr1G027120	10369	10794	14856	6139	6019	7019	12236	12320	14635	16290	19105	8845	8377	13373	6856	29593
HORVU1Hr1G027140	116	123	166	89	85	92	143	168	178	191	234	96	107	176	90	400
HORVU1Hr1G027170	490	520	632	283	271	306	496	739	622	786	943	395	351	597	286	1204
HORVU1Hr1G027180	260	281	369	168	129	157	281	420	357	480	514	235	180	331	143	690
HORVU1Hr1G027190	16	30	24	11	7	12	20	38	30	41	43	14	23	32	10	62
HORVU1Hr1G027220	508	903	1053	479	467	431	568	889	884	925	1184	601	500	763	448	1937
HORVU1Hr1G027230	240	240	271	113	152	212	316	277	314	404	473	154	152	335	151	546
HORVU1Hr1G027250	55	51	43	20	37	47	47	41	66	62	82	34	57	78	32	135
HORVU1Hr1G027280	35	50	51	27	25	37	64	66	71	75	76	39	21	60	31	124
HORVU1Hr1G027300	11996	11473	14479	6167	7147	7601	13433	14014	14753	17115	19696	8756	8838	14934	6644	29574
HORVU1Hr1G027310	131	105	127	61	111	88	144	114	138	170	236	84	123	206	75	282
HORVU1Hr1G027340	10231	10002	12578	5667	7653	7952	10583	13150	14443	14777	17098	8308	8956	13184	6319	26037
HORVU1Hr1G027350	5144	4892	5833	2883	4557	4483	4808	6836	8208	6880	8136	4374	5300	6803	3279	12929
HORVU1Hr1G027360	168	222	251	113	98	120	216	257	254	322	403	156	160	270	112	604
HORVU1Hr1G027400	91	64	68	116	80	54	23	40	135	64	67	102	149	120	48	157
HORVU1Hr1G027410	0	0	0	0	0	0	0	1	0	0	0	0	0	0	0	0
HORVU1Hr1G027420	4346	5310	8654	7369	4059	3572	2577	3258	3205	2839	3751	6111	4772	3620	3053	4748
HORVU1Hr1G027440	3	0	0	0	0	1	2	1	0	0	0	0	0	0	0	1
HORVU1Hr1G027460	3	4	1	2	0	5	0	1	2	2	2	4	0	2	2	1
HORVU1Hr1G027490	204	262	242	187	139	125	154	116	147	138	142	176	151	142	79	174
HORVU1Hr1G027500	0	0	0	0	0	0	1	0	0	0	0	0	0	0	0	1
HORVU1Hr1G027510	3	15	3	6	123	5	3	18	7	14	37	29	111	33	9	85
HORVU1Hr1G027520	60	84	77	161	117	102	80	73	133	87	109	98	125	119	74	206
HORVU1Hr1G027540	0	0	0	0	1	0	0	0	0	0	0	0	0	0	0	0
HORVU1Hr1G027550	721	978	1489	888	552	589	834	803	531	460	748	939	687	537	589	842
HORVU1Hr1G027570	143	226	304	197	134	139	160	144	118	102	164	154	178	119	131	128
HORVU1Hr1G027600	732	730	890	930	826	661	642	593	856	754	656	936	840	767	529	1094
HORVU1Hr1G027620	3357	4207	5284	5114	3292	3255	1863	2483	3530	2646	2417	3075	2933	2649	2144	3243
HORVU1Hr1G027660	53	112	149	129	51	47	24	51	91	84	105	96	86	75	53	118
HORVU1Hr1G027690	3284	3659	4333	4053	2722	2573	1676	1913	3121	2353	2384	3013	2450	2479	1532	3085
HORVU1Hr1G027700	504	279	199	164	110	88	115	112	573	258	132	114	383	340	315	379
HORVU1Hr1G027770	903	972	1401	1058	1620	1555	855	1119	826	655	644	804	989	583	656	770
HORVU1Hr1G027810	2099	2636	3942	3408	3280	2742	1464	2321	4276	3065	2922	4085	3323	3311	2345	4135
HORVU1Hr1G027840	13325	11491	15835	16381	10017	15273	5838	8434	6378	3910	3112	5319	4007	3767	2805	2487
HORVU1Hr1G027850	17	68	127	136	172	120	11	100	88	57	106	158	249	111	88	244
HORVU1Hr1G027910	0	0	0	0	0	0	0	0	0	0	0	0	0	0	0	0
HORVU1Hr1G027920	158	191	265	209	148	138	105	97	156	135	168	257	138	134	123	176
HORVU1Hr1G027930	10	40	35	49	34	30	4	22	32	25	32	44	29	22	31	27
HORVU1Hr1G027980	380	490	915	961	682	448	433	450	848	484	695	1267	721	648	578	1179
HORVU1Hr1G028010	0	0	1	1	0	0	0	0	0	0	0	0	0	0	0	0
HORVU1Hr1G028030	4422	6000	6359	2817	2631	1780	2029	3816	3448	3476	5035	7447	8012	3913	6627	6029
HORVU1Hr1G028090	68	121	204	167	97	103	44	42	138	93	85	121	139	116	79	142
HORVU1Hr1G028150	1	0	1	0	7	0	6	5	0	6	15	5	53	31	2	87
HORVU1Hr1G028170	22	32	23	35	1	5	4	4	89	65	38	29	14	15	7	6
HORVU1Hr1G028190	2530	2617	2752	2908	1679	1719	1181	1438	1770	1393	1248	1914	1484	1454	1006	1679
HORVU1Hr1G028200	2122	2541	1856	3005	2198	2057	104	1062	558	233	235	283	816	393	218	204
HORVU1Hr1G028210	0	0	0	0	0	0	0	0	0	0	0	0	0	0	0	0
HORVU1Hr1G028250	0	1	0	0	0	0	0	1	1	0	0	0	25	1	0	4
HORVU1Hr1G028260	3	1	3	5	2	0	0	0	4	2	2	9	5	1	4	10
HORVU1Hr1G028270	0	3	5	18	18	1	1	3	3	2	2	5	16	5	5	10
HORVU1Hr1G028280	1238	1468	1521	1314	790	708	368	563	821	586	598	930	733	701	473	846
HORVU1Hr1G028330	427	618	846	750	438	405	303	345	515	326	427	557	520	368	276	584
HORVU1Hr1G028430	8	8	10	5	5	6	3	10	3	1	3	5	6	9	1	5
HORVU1Hr1G028450	377	414	753	901	584	494	256	334	555	329	384	652	511	367	277	604
HORVU1Hr1G028500	368	400	475	461	318	290	175	266	356	276	322	439	302	294	224	401
HORVU1Hr1G028510	368	400	475	461	318	290	175	266	357	276	322	439	302	294	224	402
HORVU1Hr1G028520	53	46	49	13	7	10	13	9	32	20	31	30	23	31	19	36
HORVU1Hr1G028530	0	0	0	0	0	1	0	0	0	0	0	1	1	0	0	0
HORVU1Hr1G028540	1	0	0	0	0	0	0	0	0	0	0	0	0	0	0	0
HORVU1Hr1G028560	6	4	7	7	2	5	0	4	5	1	2	3	1	1	0	5
HORVU1Hr1G028570	443	717	1360	1545	1341	863	509	711	1446	1004	1217	2121	2040	1670	1025	3403
HORVU1Hr1G028640	0	0	0	0	0	0	0	0	0	0	0	0	0	0	0	0
HORVU1Hr1G028650	0	0	1	0	2	0	8	0	0	0	0	5	11	12	6	29
HORVU1Hr1G028660	20	12	7	6	3	2	6	8	2	4	3	9	9	6	1	14
HORVU1Hr1G028680	772	1025	1442	1177	1340	1072	1835	1381	990	825	1362	1475	1494	1350	1259	1971
HORVU1Hr1G028690	1	0	0	0	0	0	0	0	0	0	0	0	0	0	0	1
HORVU1Hr1G028720	3464	4397	4249	3595	2407	2289	1602	1586	2671	2775	2321	3027	3939	3424	1598	4679
HORVU1Hr1G028780	91	98	200	218	228	160	119	127	257	253	171	301	212	208	139	276
HORVU1Hr1G028810	54	62	79	65	52	30	22	27	59	23	36	44	39	36	22	61
HORVU1Hr1G028820	3081	2789	2795	2245	1427	1679	1857	1412	1979	1756	1620	2159	1966	1720	1072	2488
HORVU1Hr1G028850	19	18	23	19	14	9	23	3	20	16	12	41	17	14	6	29
HORVU1Hr1G028870	0	1	0	1	0	0	0	0	0	0	0	0	0	0	0	3
HORVU1Hr1G028890	579	894	1392	1106	842	672	519	633	879	452	520	863	619	509	523	537
HORVU1Hr1G028900	85	137	102	64	65	68	110	48	81	79	53	83	60	59	76	50
HORVU1Hr1G028920	2352	3100	3023	1475	1012	1414	421	520	1353	1395	1351	1438	882	978	784	751
HORVU1Hr1G028970	179	357	738	835	865	552	136	293	971	627	822	1235	1037	674	702	1307
HORVU1Hr1G029020	5	3	12	19	13	7	0	3	18	4	18	37	36	12	26	36
HORVU1Hr1G029050	3	5	12	14	8	9	0	4	17	3	2	30	20	8	18	14
HORVU1Hr1G029060	0	1	2	1	8	1	0	3	6	2	11	10	5	2	6	7
HORVU1Hr1G029080	5	46	61	101	95	55	3	32	46	13	26	97	77	28	38	84
HORVU1Hr1G029090	451	455	437	348	311	220	458	339	319	286	455	595	423	468	212	652
HORVU1Hr1G029110	98	127	195	182	154	152	70	110	156	114	114	183	237	174	88	257
HORVU1Hr1G029170	17	9	7	8	10	11	12	4	5	5	15	8	6	10	5	12
HORVU1Hr1G029180	224	78	146	259	263	546	451	924	155	131	248	178	639	730	348	1190
HORVU1Hr1G029220	2	0	0	2	2	0	0	0	0	1	1	0	0	0	0	1
HORVU1Hr1G029240	9	7	9	6	7	10	8	3	6	3	11	7	8	10	6	11
HORVU1Hr1G029280	140	145	119	149	69	53	116	66	88	131	121	88	41	49	22	63
HORVU1Hr1G029290	40	38	58	68	91	42	36	26	70	67	80	76	138	112	31	221
HORVU1Hr1G029350	0	0	0	1	0	0	0	0	0	0	0	0	0	0	0	0
HORVU1Hr1G029360	0	0	0	0	0	0	0	0	0	0	0	0	0	0	0	0
HORVU1Hr1G029370	225	230	397	338	307	330	284	235	376	256	247	371	355	364	263	537
HORVU1Hr1G029460	189	235	208	151	374	54	134	216	113	140	175	248	1110	1892	67	4380
HORVU1Hr1G029480	445	650	740	522	386	333	299	386	413	259	360	510	482	357	242	615
HORVU1Hr1G029490	716	935	1352	1369	1137	786	391	449	1091	772	696	1196	1235	901	619	1447
HORVU1Hr1G029510	0	1	0	0	0	0	0	0	0	0	0	0	1	0	0	0
HORVU1Hr1G029520	0	1	0	0	3	0	0	8	1	0	0	2	25	10	1	7
HORVU1Hr1G029540	9	21	43	44	44	28	5	16	18	14	9	19	67	48	18	117
HORVU1Hr1G029640	0	0	4	3	1	0	0	0	0	0	0	0	4	1	2	1
HORVU1Hr1G029680	0	1	2	0	2	0	0	0	0	0	1	2	0	2	5	0
HORVU1Hr1G029710	0	0	0	0	0	0	0	0	0	0	0	0	0	0	0	0
HORVU1Hr1G029760	0	0	0	1	0	0	0	0	0	0	0	0	0	0	0	0
HORVU1Hr1G029770	10	39	26	85	6	14	7	10	14	10	28	50	29	31	34	34
HORVU1Hr1G029800	912	1016	1365	1299	908	812	519	680	1021	761	618	998	756	747	587	870
HORVU1Hr1G029820	0	1	1	0	0	0	0	0	0	0	0	0	0	2	0	2
HORVU1Hr1G029850	3282	3091	3004	3173	1458	2606	1530	3874	2446	1601	1317	1967	1974	3212	1978	3350
HORVU1Hr1G029870	3853	3329	3427	2651	2448	2249	2470	2677	3825	3238	2865	3789	3593	3136	2039	4844
HORVU1Hr1G029880	2	1	0	0	1	0	2	0	0	1	1	0	0	2	0	0
HORVU1Hr1G029890	0	0	0	1	0	0	0	0	0	0	0	0	0	0	0	1
HORVU1Hr1G029900	0	0	0	0	0	0	0	1	0	0	0	0	0	0	0	1
HORVU1Hr1G029910	0	0	0	0	0	0	0	0	0	0	0	0	0	0	0	0
HORVU1Hr1G029920	1073	1171	646	685	227	184	98	53	871	541	435	355	202	186	132	50
HORVU1Hr1G029950	307	367	527	595	611	504	397	214	805	571	554	675	638	624	399	918
HORVU1Hr1G030000	1092	1218	1713	1596	1335	1110	985	1016	1386	1005	1129	1387	1583	1493	955	2373
HORVU1Hr1G030030	1578	1790	2132	1635	1024	1044	895	740	1442	1292	1173	1585	1106	1178	804	1474
HORVU1Hr1G030040	340	366	550	483	520	388	264	470	562	406	621	587	599	362	321	807
HORVU1Hr1G030060	269	141	285	213	189	194	156	202	201	192	195	155	88	127	78	167
HORVU1Hr1G030080	77	190	225	225	127	104	33	126	109	75	108	141	110	88	101	147
HORVU1Hr1G030100	5	22	23	30	20	16	8	10	21	12	27	43	23	17	13	19
HORVU1Hr1G030140	588	682	762	714	823	624	370	579	628	486	514	556	1052	774	405	1209
HORVU1Hr1G030190	474	586	789	647	1003	883	480	600	442	390	363	501	629	362	401	491
HORVU1Hr1G030200	675	956	1814	2210	2666	1348	1103	1702	2810	2545	4169	5710	2575	1844	2199	3534
HORVU1Hr1G030220	43	48	57	49	40	23	55	34	68	58	46	82	58	57	61	78
HORVU1Hr1G030300	0	0	0	0	0	0	0	0	0	0	0	1	0	0	0	0
HORVU1Hr1G030390	1914	2089	2528	2087	1485	1178	711	684	2800	1627	1595	2056	1389	1324	944	1603
HORVU1Hr1G030410	208	208	228	214	185	175	109	81	270	199	144	196	148	138	96	166
HORVU1Hr1G030420	0	0	0	0	1	0	0	0	0	0	0	0	0	0	0	0
HORVU1Hr1G030440	0	0	0	0	0	2	3	0	0	0	0	0	0	0	0	0
HORVU1Hr1G030460	123	143	190	222	171	149	96	102	159	93	95	161	177	95	74	156
HORVU1Hr1G030480	620	690	846	817	604	488	295	356	656	400	396	622	627	474	319	657
HORVU1Hr1G030540	539	677	538	646	602	462	443	423	435	493	503	579	434	403	235	687
HORVU1Hr1G030550	0	0	5	12	4	4	2	4	3	1	2	10	6	6	1	13
HORVU1Hr1G030580	1	4	5	4	8	5	2	2	6	0	5	6	2	1	1	6
HORVU1Hr1G030610	3	2	3	2	4	5	12	4	6	2	4	10	8	5	3	5
HORVU1Hr1G030620	220	161	136	143	149	155	105	98	160	122	126	115	85	103	106	73
HORVU1Hr1G030630	453	611	681	611	467	382	292	305	599	365	381	491	475	353	354	525
HORVU1Hr1G030660	2327	2692	3953	4798	3473	3126	1748	1977	4595	3349	2779	4791	3067	3024	2282	3797
HORVU1Hr1G030710	257	213	228	201	235	172	157	113	323	361	294	246	322	281	171	446
HORVU1Hr1G030740	80	216	182	195	208	132	59	106	226	151	157	256	320	188	178	378
HORVU1Hr1G030790	11879	17113	24136	16793	7390	8541	5868	7190	6865	5315	6863	8707	7030	5968	4865	8364
HORVU1Hr1G030840	4	2	2	2	9	5	3	3	5	0	0	6	4	6	6	18
HORVU1Hr1G030870	269	333	413	392	328	272	183	208	347	267	193	306	264	243	183	353
HORVU1Hr1G030880	17	9	7	8	10	11	13	5	5	5	15	8	6	10	5	12
HORVU1Hr1G030930	71	152	290	197	157	103	69	126	146	74	113	173	192	123	95	261
HORVU1Hr1G030960	0	0	0	0	0	0	0	0	0	0	0	0	0	0	0	0
HORVU1Hr1G031010	1867	2810	5076	5588	4694	2952	1446	2446	4205	2042	2465	4562	3630	2809	2998	4379
HORVU1Hr1G031020	0	1	1	5	12	1	1	2	6	4	5	5	5	5	2	11
HORVU1Hr1G031090	0	0	0	5	0	0	0	1	0	1	3	1	4	1	0	1
HORVU1Hr1G031150	1	5	15	21	21	11	0	3	10	2	3	18	3	4	6	11
HORVU1Hr1G031180	1437	2383	3747	3930	2644	2087	875	2295	2250	1325	1587	3438	2945	1764	1690	3421
HORVU1Hr1G031220	2427	2432	2760	2344	1816	1646	962	1187	3517	3054	1886	1816	1778	1714	1558	1657
HORVU1Hr1G031230	12314	15058	19995	19170	12297	13736	7960	10126	9898	6388	6260	9319	7221	7068	6090	6799
HORVU1Hr1G031250	254	455	820	846	1369	755	822	947	1067	627	874	1271	1246	872	1048	1446
HORVU1Hr1G031270	427	518	951	915	768	548	562	541	1046	580	685	1402	682	694	647	915
HORVU1Hr1G031310	1247	1775	2895	3403	3329	2573	695	1404	2922	1871	1735	2608	2407	1985	1778	2588
HORVU1Hr1G031340	2	1	0	1	0	1	3	0	0	0	0	1	2	1	0	1
HORVU1Hr1G031370	934	1075	1383	1579	1107	933	382	501	878	557	525	795	771	619	466	928
HORVU1Hr1G031420	0	0	0	0	0	0	0	0	0	0	0	0	0	0	0	1
HORVU1Hr1G031430	17	21	38	38	35	29	14	20	39	31	33	58	34	30	23	45
HORVU1Hr1G031460	38	44	74	70	68	37	44	32	111	87	94	110	79	88	54	139
HORVU1Hr1G031490	0	0	0	0	0	0	0	0	0	0	0	0	0	0	0	0
HORVU1Hr1G031500	177	174	293	202	284	246	417	344	210	245	345	381	506	360	249	659
HORVU1Hr1G031540	36	52	90	96	106	97	40	50	62	52	34	85	79	51	55	78
HORVU1Hr1G031570	0	0	0	0	0	0	0	0	0	0	0	0	0	0	0	0
HORVU1Hr1G031600	5429	6644	8172	7569	4276	4337	3266	3342	4187	3321	3637	5358	4906	4531	2853	6206
HORVU1Hr1G031610	12	15	21	23	21	18	24	13	30	24	12	27	12	19	8	14
HORVU1Hr1G031660	393	629	1081	1113	903	533	447	492	1069	620	832	1280	1017	825	592	1765
HORVU1Hr1G031680	0	0	0	0	0	0	0	0	0	0	0	0	0	0	0	0
HORVU1Hr1G031780	33	36	65	52	56	29	22	39	51	40	56	37	77	43	28	69
HORVU1Hr1G031860	644	1151	1879	2097	2097	1764	648	1167	1725	939	1061	1676	1681	1172	1227	1786
HORVU1Hr1G031880	0	1	1	1	0	1	0	0	1	1	0	0	0	0	0	0
HORVU1Hr1G031900	0	0	0	0	0	0	0	0	0	0	0	0	1	0	0	0
HORVU1Hr1G031950	912	1501	2238	1871	1546	1277	633	823	1734	1258	1354	1862	1751	1354	1124	2158
HORVU1Hr1G031970	481	520	787	880	595	577	895	792	808	693	722	1123	836	769	761	1025
HORVU1Hr1G031990	3	5	12	15	12	0	11	6	6	1	3	15	4	6	10	16
HORVU1Hr1G032000	3	5	12	15	12	1	11	6	6	1	3	15	4	6	10	16
HORVU1Hr1G032020	0	0	0	0	0	0	0	0	1	0	0	0	0	0	0	0
HORVU1Hr1G032060	1464	1721	1936	1659	1157	1230	1138	1089	1619	1231	1300	1877	1422	1304	916	1705
HORVU1Hr1G032090	8	14	17	19	56	18	26	25	23	23	51	35	141	85	33	281
HORVU1Hr1G032150	11	7	9	9	211	6	14	4	18	18	64	58	106	15	16	66
HORVU1Hr1G032190	952	920	1254	1012	849	791	491	403	907	745	700	856	700	738	534	855
HORVU1Hr1G032210	0	1	1	10	8	1	0	1	1	1	1	4	5	0	1	4
HORVU1Hr1G032260	0	0	0	0	0	0	0	0	0	0	0	0	0	0	0	0
HORVU1Hr1G032310	1166	1956	3021	2936	2399	1804	558	1104	2124	1127	1287	2387	2189	1313	1292	2350
HORVU1Hr1G032390	10	18	40	33	34	20	9	14	17	12	12	49	36	15	19	29
HORVU1Hr1G032470	3	1	2	4	2	0	2	1	3	4	5	2	0	0	0	3
HORVU1Hr1G032500	180	352	545	316	305	167	155	244	324	205	347	405	268	228	128	404
HORVU1Hr1G032510	3269	4102	5282	4751	2754	3199	2050	2199	3194	2085	2289	3420	2972	2691	1690	3849
HORVU1Hr1G032600	2	4	5	2	3	1	0	4	2	1	1	1	8	1	1	3
HORVU1Hr1G032610	1791	3935	5296	5925	4392	3562	1085	3516	2602	1353	2210	4142	4437	2544	2660	4998
HORVU1Hr1G032650	34	20	20	18	9	20	18	6	10	21	7	16	18	13	8	27
HORVU1Hr1G032670	3675	6055	10459	11029	11022	7250	3095	5505	8929	4791	5822	10033	7919	5274	5879	9534
HORVU1Hr1G032770	0	0	0	0	0	0	0	0	0	0	0	0	0	0	0	0
HORVU1Hr1G032780	962	1195	1582	1518	1292	1038	419	698	1148	789	813	1305	1098	808	865	1407
HORVU1Hr1G032850	1037	1221	1786	1415	1173	996	635	768	1440	953	1016	1262	1241	1140	894	1684
HORVU1Hr1G032900	593	773	1049	1255	932	868	404	640	931	607	664	1242	1002	831	579	1234
HORVU1Hr1G032940	138	153	207	216	204	203	135	147	257	172	173	222	148	180	134	207
HORVU1Hr1G032960	499	512	763	798	784	628	254	501	784	480	558	848	608	444	542	652
HORVU1Hr1G033050	0	0	0	0	0	0	0	0	0	0	0	0	0	0	0	0
HORVU1Hr1G033060	277	270	331	288	219	222	136	102	275	211	188	271	379	320	145	347
HORVU1Hr1G033080	1	11	10	9	9	16	1	8	7	16	16	8	12	15	10	22
HORVU1Hr1G033110	621	637	897	1036	789	680	462	600	1035	789	714	1015	729	644	608	899
HORVU1Hr1G033130	502	584	826	731	775	669	369	513	794	547	572	636	696	604	477	765
HORVU1Hr1G033160	43	42	59	53	54	35	22	29	61	38	49	71	62	32	21	56
HORVU1Hr1G033210	1327	1660	2469	3203	2300	1587	867	1208	3032	2019	2129	3097	2160	2212	1655	3433
HORVU1Hr1G033270	2121	3347	4747	3989	3105	2790	938	1654	2827	1492	1760	2818	2717	1886	1622	2727
HORVU1Hr1G033300	36	36	41	27	35	25	7	9	35	41	51	43	56	32	20	63
HORVU1Hr1G033320	0	0	2	2	0	0	0	1	2	1	0	1	0	1	0	3
HORVU1Hr1G033330	0	0	0	0	0	0	0	0	0	0	0	0	0	0	0	0
HORVU1Hr1G033390	112	184	204	115	176	123	223	130	113	101	167	211	832	613	130	1064
HORVU1Hr1G033470	760	936	1226	1188	997	802	469	586	1162	712	731	1082	995	941	714	1332
HORVU1Hr1G033550	3	1	4	5	9	4	2	4	8	1	3	9	6	5	5	8
HORVU1Hr1G033580	1	0	1	2	3	2	0	3	2	0	2	4	2	2	2	5
HORVU1Hr1G033610	1	0	1	4	5	1	2	1	4	1	3	4	1	1	4	0
HORVU1Hr1G033660	146	139	151	101	75	60	68	40	86	107	77	100	61	60	48	87
HORVU1Hr1G033740	400	789	967	1223	1189	985	144	580	637	385	429	768	969	572	488	951
HORVU1Hr1G033760	3	5	4	8	6	3	3	6	3	2	3	4	5	0	3	1
HORVU1Hr1G033800	795	959	1176	1018	898	692	326	480	833	529	562	649	795	606	398	1013
HORVU1Hr1G033810	0	1	0	1	0	0	0	2	0	0	1	0	0	0	0	0
HORVU1Hr1G033850	0	3	3	1	0	0	0	0	0	2	3	0	2	0	0	0
HORVU1Hr1G033980	0	0	1	0	0	1	0	0	0	0	0	0	1	0	1	0
HORVU1Hr1G033990	74	129	215	174	104	113	51	46	146	94	91	125	144	118	84	145
HORVU1Hr1G034070	304	576	939	935	814	625	227	456	750	446	519	883	734	579	588	876
HORVU1Hr1G034130	1	3	3	0	1	0	3	2	0	3	2	3	3	2	1	6
HORVU1Hr1G034150	1	3	3	0	1	0	3	2	0	3	2	3	3	2	1	6
HORVU1Hr1G034370	21	56	50	49	43	55	10	38	34	18	34	54	50	30	43	70
HORVU1Hr1G034400	578	592	538	683	352	292	208	178	1087	660	435	665	502	413	573	444
HORVU1Hr1G034420	6	3	12	8	2	1	1	4	4	3	2	4	3	1	6	3
HORVU1Hr1G034470	5059	6107	9300	8127	4426	4235	3027	4659	3976	2254	3040	4872	3402	2623	2595	3388
HORVU1Hr1G034490	5	40	102	42	47	40	28	22	10	7	21	14	41	27	23	23
HORVU1Hr1G034570	436	594	943	785	713	621	386	504	531	334	521	689	710	578	402	996
HORVU1Hr1G034630	1580	2069	2258	2055	1438	1357	792	866	1824	1244	1271	1676	1470	1246	881	1716
HORVU1Hr1G034640	0	0	0	0	0	0	0	0	0	0	0	0	0	0	0	1
HORVU1Hr1G034650	180	179	159	168	295	161	163	170	340	316	382	305	516	488	166	905
HORVU1Hr1G034730	1457	1735	2167	2001	1456	1357	904	953	1407	1052	1048	1629	1332	1261	861	1685
HORVU1Hr1G034750	1	2	1	2	1	3	0	0	0	0	2	0	4	2	1	2
HORVU1Hr1G034850	0	0	0	1	0	0	0	1	0	0	0	1	0	0	0	0
HORVU1Hr1G034860	0	0	1	0	0	0	0	0	0	0	0	0	0	0	0	0
HORVU1Hr1G034880	171	327	406	423	410	361	79	238	255	198	213	375	478	294	191	502
HORVU1Hr1G034980	2208	2336	3107	3026	2717	2108	1580	1643	2780	1819	1705	2472	2447	2378	1537	3172
HORVU1Hr1G035010	0	0	1	0	0	0	0	0	0	1	0	1	1	1	1	0
HORVU1Hr1G035080	0	0	0	0	0	0	1	0	0	0	0	0	0	0	0	0
HORVU1Hr1G035090	14	26	25	22	14	10	13	24	24	19	10	12	22	14	13	18
HORVU1Hr1G035100	0	0	1	0	1	0	1	0	0	1	0	0	1	1	1	0
HORVU1Hr1G035130	2	4	1	5	2	0	0	0	0	0	3	1	8	1	0	3
HORVU1Hr1G035160	560	535	923	795	621	498	495	465	1111	770	764	1096	801	941	628	998
HORVU1Hr1G035190	0	0	0	0	0	0	0	0	0	0	0	0	0	1	0	0
HORVU1Hr1G035200	389	536	688	690	560	485	226	374	634	429	424	686	498	477	397	567
HORVU1Hr1G035210	303	270	303	353	296	216	232	176	356	243	214	326	282	267	144	387
HORVU1Hr1G035280	89	81	106	94	82	72	39	38	115	105	86	85	143	122	60	289
HORVU1Hr1G035290	19	15	14	23	10	8	21	22	18	8	9	15	16	18	5	21
HORVU1Hr1G035350	28	14	25	30	24	18	25	24	31	27	26	30	46	42	24	45
HORVU1Hr1G035360	51	48	42	34	17	15	2	3	27	23	4	9	24	11	17	9
HORVU1Hr1G035370	5	7	11	7	5	2	3	2	3	2	5	5	9	2	5	3
HORVU1Hr1G035380	6	0	10	17	45	18	15	42	0	0	1	0	0	0	0	1
HORVU1Hr1G035390	1034	1754	2465	2440	1719	1502	866	1271	1893	1190	1251	2030	1622	1379	1136	1856
HORVU1Hr1G035440	634	960	1211	1684	1288	1202	396	717	980	584	613	1224	988	828	612	1042
HORVU1Hr1G035450	0	0	0	0	0	1	0	0	0	0	0	0	0	0	0	0
HORVU1Hr1G035490	966	1237	1670	1831	1445	1224	712	853	1792	1069	1432	1971	1625	1509	1140	2104
HORVU1Hr1G035600	584	549	568	638	353	401	200	353	477	344	346	460	332	265	226	370
HORVU1Hr1G035630	0	0	0	0	0	0	0	0	0	0	0	0	0	0	0	1
HORVU1Hr1G035650	166	149	238	233	228	205	188	137	321	163	173	235	209	176	113	233
HORVU1Hr1G035660	3	0	0	0	0	1	0	2	1	0	0	2	0	0	0	0
HORVU1Hr1G035720	42878	42763	83827	66414	60591	59905	166322	132663	36465	26677	62785	72914	68905	60061	62274	71382
HORVU1Hr1G035740	7	15	44	39	53	25	8	14	28	20	20	45	40	19	33	42
HORVU1Hr1G035760	12	14	19	22	7	1	7	7	27	14	12	17	12	17	5	27
HORVU1Hr1G035930	59	66	91	92	53	60	30	41	79	68	51	80	51	62	34	76
HORVU1Hr1G035950	0	0	0	0	4	0	2	0	5	1	3	6	26	6	0	51
HORVU1Hr1G035960	356	560	849	865	873	663	613	656	815	569	616	958	941	759	692	1398
HORVU1Hr1G035980	0	0	0	0	0	0	0	0	0	0	0	0	0	0	0	0
HORVU1Hr1G035990	0	0	0	0	1	2	2	0	0	0	0	0	1	0	0	0
HORVU1Hr1G036020	0	0	0	0	2	0	0	0	0	0	0	0	0	0	0	0
HORVU1Hr1G036040	475	650	967	648	409	356	172	232	527	591	595	887	794	615	321	1066
HORVU1Hr1G036060	382	503	888	697	778	615	470	691	801	456	619	1003	883	748	585	1133
HORVU1Hr1G036120	449	366	349	570	561	498	331	359	628	504	557	511	427	461	380	476
HORVU1Hr1G036160	2	4	9	10	2	4	0	2	7	0	3	6	4	4	4	7
HORVU1Hr1G036200	402	332	324	384	319	263	222	227	475	413	363	363	358	391	242	559
HORVU1Hr1G036220	0	0	0	0	0	0	0	0	0	0	0	0	0	0	0	0
HORVU1Hr1G036280	5	5	10	7	4	4	0	0	3	13	6	16	0	3	5	5
HORVU1Hr1G036300	2	1	6	3	2	3	4	0	3	1	3	1	0	3	2	0
HORVU1Hr1G036320	0	0	0	0	0	0	0	0	0	0	0	0	0	0	0	0
HORVU1Hr1G036340	3	14	45	51	23	18	4	35	25	13	28	83	26	22	35	59
HORVU1Hr1G036360	17	9	7	8	10	11	13	5	5	5	15	8	6	10	5	12
HORVU1Hr1G036370	48	38	56	77	64	62	18	24	40	42	28	44	37	38	29	25
HORVU1Hr1G036440	1	1	6	4	1	0	2	5	2	1	2	0	17	4	0	9
HORVU1Hr1G036490	13	11	19	37	8	21	8	23	9	1	7	2	11	21	2	17
HORVU1Hr1G036500	710	1188	1706	2230	1151	999	202	575	1097	641	645	998	799	604	624	683
HORVU1Hr1G036510	22	16	18	10	4	8	8	2	11	4	15	2	1	7	2	6
HORVU1Hr1G036520	3	0	2	1	0	2	0	0	2	0	1	3	0	0	0	0
HORVU1Hr1G036580	0	0	0	0	0	0	0	0	0	0	0	0	0	0	0	0
HORVU1Hr1G036590	0	1	1	4	2	2	2	2	0	0	0	0	2	3	1	5
HORVU1Hr1G036620	0	0	1	0	0	0	0	2	0	1	1	0	1	1	1	0
HORVU1Hr1G036630	3	20	43	52	41	44	7	27	38	26	26	28	33	24	27	40
HORVU1Hr1G036640	1222	1350	1742	2315	1846	1571	936	1233	2307	1512	1427	1951	1615	1550	1152	1967
HORVU1Hr1G036670	209	276	322	394	249	230	189	261	261	145	153	173	251	172	133	221
HORVU1Hr1G036720	160	180	310	337	392	256	168	202	271	195	225	362	524	322	224	743
HORVU1Hr1G036760	0	2	4	3	2	0	0	1	0	0	0	0	0	0	0	2
HORVU1Hr1G036780	7	18	30	55	57	25	11	28	16	11	22	40	45	24	23	47
HORVU1Hr1G036800	0	0	0	0	0	0	0	0	0	0	0	0	0	0	0	0
HORVU1Hr1G036810	0	1	2	0	0	0	0	0	0	2	0	0	0	0	0	0
HORVU1Hr1G036820	0	0	0	0	0	0	0	0	0	0	0	0	0	0	0	0
HORVU1Hr1G036870	0	0	0	0	0	0	0	0	0	0	0	0	0	0	0	0
HORVU1Hr1G036910	0	0	0	0	0	0	0	0	0	0	0	0	0	0	0	0
HORVU1Hr1G036920	5683	4936	5518	3281	3477	4631	1599	3924	6398	5479	3423	2925	5107	4589	4159	4075
HORVU1Hr1G036930	0	1	0	0	0	0	0	0	1	0	0	0	0	0	0	0
HORVU1Hr1G036940	18	16	12	15	14	18	7	13	24	16	9	18	14	15	8	24
HORVU1Hr1G036970	282	222	268	214	268	338	58	180	281	202	122	126	205	112	138	87
HORVU1Hr1G036980	26	23	28	35	16	17	28	15	55	22	22	23	45	22	4	62
HORVU1Hr1G036990	529	804	1508	1492	1633	1337	364	935	1365	773	922	1539	1432	1037	985	1699
HORVU1Hr1G037000	529	801	1495	1480	1618	1327	362	928	1355	765	917	1529	1425	1030	982	1683
HORVU1Hr1G037040	0	0	0	0	0	0	0	0	0	0	1	0	4	1	0	8
HORVU1Hr1G037050	0	0	0	1	0	0	0	0	0	0	1	0	0	0	0	1
HORVU1Hr1G037060	0	1	1	1	6	1	0	0	1	3	1	5	10	5	3	7
HORVU1Hr1G037090	18	27	9	2	9	2	2	1	10	13	8	41	29	13	5	26
HORVU1Hr1G037110	14	12	18	20	188	13	120	183	34	21	200	118	629	643	38	1940
HORVU1Hr1G037120	3	5	3	0	0	0	0	1	0	2	0	0	0	0	0	0
HORVU1Hr1G037150	306	420	428	113	115	81	68	77	105	60	104	150	210	167	79	314
HORVU1Hr1G037160	36	50	53	34	18	24	14	12	26	32	12	37	26	23	16	20
HORVU1Hr1G037250	211	318	502	426	333	216	136	223	599	324	448	905	585	472	545	656
HORVU1Hr1G037270	8	19	6	1	5	15	19	1	0	2	2	3	0	1	2	3
HORVU1Hr1G037280	1	3	1	2	0	0	3	0	0	1	0	1	4	1	0	2
HORVU1Hr1G037320	60	43	57	38	49	32	15	24	111	83	73	59	75	69	40	76
HORVU1Hr1G037340	740	748	896	812	392	484	267	264	559	480	507	606	521	467	295	592
HORVU1Hr1G037350	12	17	14	36	18	13	15	15	16	16	18	20	18	15	4	22
HORVU1Hr1G037460	351	380	530	958	1135	831	538	740	1196	800	867	999	999	1011	820	1549
HORVU1Hr1G037500	6	20	21	30	39	15	6	18	48	24	24	35	27	47	35	65
HORVU1Hr1G037530	0	0	0	0	0	0	0	0	0	0	0	0	0	0	0	0
HORVU1Hr1G037550	766	436	821	690	883	584	375	289	1124	898	661	666	495	502	355	506
HORVU1Hr1G037570	38	26	19	11	49	16	8	11	18	12	30	25	49	37	20	75
HORVU1Hr1G037580	1049	1207	1345	1378	832	917	631	558	997	795	731	946	711	688	539	840
HORVU1Hr1G037590	1086	1128	1113	1059	668	731	256	532	913	675	610	771	575	560	441	733
HORVU1Hr1G037610	77	82	41	49	59	50	50	87	43	32	42	45	64	69	36	82
HORVU1Hr1G037630	0	0	0	0	0	0	0	0	0	0	0	0	0	2	0	1
HORVU1Hr1G037640	4	14	23	30	43	14	12	12	75	43	63	118	50	38	48	49
HORVU1Hr1G037650	2269	3536	4169	2745	2165	1859	1542	1790	2474	1468	2106	2409	3039	2000	1596	4304
HORVU1Hr1G037710	0	1	0	0	1	0	0	0	1	0	0	0	1	0	0	0
HORVU1Hr1G037730	410	458	668	795	608	556	373	464	742	566	585	721	531	439	423	558
HORVU1Hr1G037750	49	27	20	29	32	32	36	27	35	20	32	24	24	34	13	31
HORVU1Hr1G037760	336	304	235	330	491	197	453	581	1285	1434	2778	2340	782	1047	619	2886
HORVU1Hr1G037800	1951	2246	2863	2450	1684	1606	1646	1259	2125	1513	1434	1982	1611	1690	1119	2507
HORVU1Hr1G037810	799	887	1056	1190	671	573	220	240	811	458	404	819	591	451	283	582
HORVU1Hr1G037820	16	40	63	52	40	38	26	15	36	22	30	55	28	19	22	38
HORVU1Hr1G037870	31	31	27	31	15	18	59	37	30	21	37	23	19	21	16	39
HORVU1Hr1G037900	69	72	126	74	52	45	17	93	56	73	65	57	43	57	44	101
HORVU1Hr1G037910	10	20	17	6	5	6	0	4	9	15	6	9	4	5	4	19
HORVU1Hr1G037920	3	4	12	5	1	2	0	2	4	1	4	2	2	2	0	8
HORVU1Hr1G037930	0	0	0	0	0	0	0	0	0	0	0	0	0	0	0	0
HORVU1Hr1G037940	1	2	0	1	0	0	0	0	2	0	1	0	0	3	0	3
HORVU1Hr1G037950	0	2	9	5	5	1	10	0	7	8	8	2	1	12	3	10
HORVU1Hr1G037960	1	8	11	7	4	0	2	5	9	6	14	10	9	15	6	6
HORVU1Hr1G037970	0	5	6	9	2	2	0	1	2	1	1	2	1	5	1	6
HORVU1Hr1G037990	0	0	0	0	0	0	0	0	0	0	0	0	0	0	0	0
HORVU1Hr1G038000	13	22	20	9	8	10	9	10	11	21	10	9	6	9	7	25
HORVU1Hr1G038010	1064	1083	2041	1174	849	832	738	1044	942	668	969	866	661	815	621	1448
HORVU1Hr1G038020	71	72	126	76	59	46	24	94	58	77	75	56	46	57	45	105
HORVU1Hr1G038030	130	159	247	196	134	157	73	132	141	84	126	149	107	108	72	154
HORVU1Hr1G038040	195	180	211	238	153	142	216	216	258	185	252	218	138	203	141	259
HORVU1Hr1G038060	2091	2803	4036	5328	2385	2322	958	1986	2092	1370	1168	1827	2505	2639	1014	4171
HORVU1Hr1G038070	1644	1794	2583	2965	1389	1506	782	1203	1656	1126	835	1190	1545	1788	715	2479
HORVU1Hr1G038120	2108	1602	1654	1577	5412	3826	3140	2277	3636	3290	2629	2574	3233	3721	2394	3156
HORVU1Hr1G038130	1143	950	959	1003	3444	2406	1657	1331	2041	1895	1552	1533	2004	2228	1504	1868
HORVU1Hr1G038150	3	5	0	6	16	2	6	2	16	9	9	12	25	13	11	29
HORVU1Hr1G038180	1089	2270	3653	4606	2284	1819	381	784	3662	2216	2206	4912	2725	1840	2022	2440
HORVU1Hr1G038210	1174	1592	2337	2984	2272	1542	1112	1256	2739	1723	1581	2716	1693	1497	1183	2501
HORVU1Hr1G038220	231	235	251	233	158	165	156	157	310	265	247	291	222	241	179	278
HORVU1Hr1G038230	11	13	11	4	9	10	8	11	25	29	8	18	35	14	1	24
HORVU1Hr1G038240	291	368	404	435	278	292	203	253	433	294	376	475	345	323	265	450
HORVU1Hr1G038250	0	0	0	0	0	0	0	0	0	0	0	0	0	0	0	0
HORVU1Hr1G038260	23	23	28	28	23	18	18	7	17	10	24	17	14	13	15	20
HORVU1Hr1G038270	1175	1135	1428	1365	1026	975	921	764	1364	1029	951	1185	1227	1187	682	1721
HORVU1Hr1G038280	1348	1762	2580	2525	2299	1658	957	1212	2787	1813	1983	3008	2291	2254	1504	3426
HORVU1Hr1G038320	0	0	0	0	0	2	0	1	0	1	0	0	0	0	1	1
HORVU1Hr1G038330	998	1660	1012	550	369	239	184	226	708	610	442	1122	841	581	445	539
HORVU1Hr1G038370	466	714	951	1105	1203	904	440	829	850	691	727	1098	1240	904	825	1480
HORVU1Hr1G038380	0	0	0	0	0	0	0	1	1	0	3	0	1	0	0	2
HORVU1Hr1G038410	640	691	1168	1183	890	674	632	366	1216	787	652	1027	744	773	526	1132
HORVU1Hr1G038500	19	23	34	8	5	3	2	6	6	6	23	11	24	19	7	25
HORVU1Hr1G038510	8	8	7	5	3	0	0	0	31	12	6	10	7	5	6	2
HORVU1Hr1G038560	108	64	82	68	69	83	25	65	62	60	56	86	62	31	31	56
HORVU1Hr1G038580	0	0	3	3	13	6	3	6	7	9	3	5	8	4	3	7
HORVU1Hr1G038620	1960	2747	3732	2698	1695	2073	825	967	2088	1451	1528	1933	2376	2099	1321	3656
HORVU1Hr1G038650	0	0	0	0	0	0	0	0	0	0	0	0	0	0	0	0
HORVU1Hr1G038670	6	17	15	16	14	7	0	10	14	4	10	21	18	15	12	21
HORVU1Hr1G038680	887	1428	2021	2494	2503	1886	464	812	2159	1208	1137	2276	1508	1025	990	1132
HORVU1Hr1G038700	156	194	304	337	271	156	157	113	386	319	200	445	376	375	232	492
HORVU1Hr1G038710	0	0	0	0	0	0	0	0	0	0	0	0	0	0	0	0
HORVU1Hr1G038730	0	0	0	0	0	0	0	0	1	0	11	1	38	3	0	6
HORVU1Hr1G038740	0	0	0	0	0	0	0	0	0	0	0	3	0	1	0	0
HORVU1Hr1G038750	204	242	191	246	223	213	289	161	222	193	197	147	173	152	97	185
HORVU1Hr1G038770	2	0	3	2	1	4	3	2	6	2	1	1	6	2	0	13
HORVU1Hr1G038800	315	287	323	272	124	128	139	104	216	166	156	170	106	110	62	122
HORVU1Hr1G038810	1	0	3	4	0	0	0	0	7	1	0	3	9	3	6	3
HORVU1Hr1G038820	553	918	1147	1198	862	818	343	622	867	586	617	918	811	665	552	845
HORVU1Hr1G038840	260	373	495	479	348	347	183	248	385	282	239	345	317	305	230	327
HORVU1Hr1G038850	2312	3243	4150	3466	3022	2551	2252	2313	3384	2611	2469	3139	3366	2997	2152	4778
HORVU1Hr1G038870	13	47	6	5	4	6	10	5	7	7	3	10	11	11	3	6
HORVU1Hr1G038880	615	603	970	1338	1170	990	308	519	824	473	481	714	699	581	372	742
HORVU1Hr1G038890	3282	3033	3162	2509	1765	2036	2283	1723	2851	2904	2584	2880	2903	2821	1456	3905
HORVU1Hr1G038920	0	0	0	0	0	0	1	0	0	0	1	0	0	0	0	0
HORVU1Hr1G038950	16	26	8	3	11	5	0	1	6	16	5	7	14	7	9	24
HORVU1Hr1G038990	622	580	792	703	678	443	462	361	808	682	669	679	892	733	380	1276
HORVU1Hr1G039000	706	930	1339	1275	1116	944	454	584	1085	732	793	1052	942	788	691	1005
HORVU1Hr1G039010	16	25	38	23	16	17	9	8	12	15	9	21	14	22	13	33
HORVU1Hr1G039030	0	0	0	0	0	0	0	0	0	0	0	0	0	0	0	0
HORVU1Hr1G039050	1958	2285	2670	2931	1950	1919	877	1354	2133	1718	1616	2176	1802	1796	1292	1917
HORVU1Hr1G039090	354	435	561	670	451	374	245	242	477	437	407	518	385	376	258	516
HORVU1Hr1G039140	3	1	7	11	6	10	13	8	10	5	6	7	12	7	4	16
HORVU1Hr1G039150	37	74	30	17	22	8	8	11	133	142	98	50	34	45	14	20
HORVU1Hr1G039160	1940	1709	1848	1222	784	870	1510	1038	1205	1069	1184	1512	1327	1166	634	1840
HORVU1Hr1G039180	0	0	0	0	0	0	0	0	0	0	0	0	0	0	0	0
HORVU1Hr1G039200	0	1	1	0	0	0	0	0	0	0	0	0	0	0	0	1
HORVU1Hr1G039220	141	74	101	169	84	59	43	39	79	69	18	27	51	25	25	31
HORVU1Hr1G039230	295	477	697	634	558	416	332	405	647	416	454	748	528	467	372	699
HORVU1Hr1G039250	6	37	59	27	2121	47	672	583	270	370	4158	2375	11463	6421	748	20001
HORVU1Hr1G039260	1146	1266	1713	1182	740	662	657	510	873	724	841	999	1044	870	520	1229
HORVU1Hr1G039340	3	3	3	5	2	3	3	0	4	3	0	4	3	1	1	2
HORVU1Hr1G039370	171	221	296	179	187	192	119	127	184	106	113	164	155	128	175	101
HORVU1Hr1G039400	0	0	0	0	0	0	0	0	0	3	0	1	0	0	1	1
HORVU1Hr1G039410	0	0	0	1	0	0	0	0	0	0	0	0	0	0	0	0
HORVU1Hr1G039430	0	0	0	0	0	0	0	1	0	0	0	0	0	0	0	0
HORVU1Hr1G039440	0	0	1	0	1	0	0	0	0	0	3	0	0	2	1	1
HORVU1Hr1G039480	2	2	6	14	9	5	3	8	6	5	5	9	14	6	10	5
HORVU1Hr1G039500	1	1	1	0	3	0	2	4	0	0	0	1	3	0	0	0
HORVU1Hr1G039540	2787	5591	6591	2721	1785	1606	1454	1467	1942	1239	1611	3153	1409	1336	1236	1989
HORVU1Hr1G039570	34	93	225	263	198	134	27	91	189	112	113	279	205	136	159	255
HORVU1Hr1G039600	957	1061	914	539	416	373	217	342	824	592	426	700	531	553	625	484
HORVU1Hr1G039610	28	42	95	98	45	56	73	47	45	30	26	69	50	39	55	67
HORVU1Hr1G039620	75	76	168	179	87	101	48	107	105	60	50	119	87	101	56	95
HORVU1Hr1G039630	0	1	2	3	2	1	12	2	6	9	4	2	2	6	1	8
HORVU1Hr1G039670	17	29	21	26	20	18	13	14	54	55	39	38	50	50	54	28
HORVU1Hr1G039690	0	2	0	0	0	1	0	0	1	0	3	1	1	1	0	2
HORVU1Hr1G039700	203	269	360	357	295	264	215	180	356	298	264	410	311	303	217	350
HORVU1Hr1G039720	1726	2951	2798	1447	677	562	262	544	2029	1638	1184	1386	1217	778	1212	493
HORVU1Hr1G039760	0	0	0	0	1	0	0	0	0	0	0	0	0	0	1	0
HORVU1Hr1G039780	2	0	0	1	0	0	0	2	0	0	0	0	0	2	0	0
HORVU1Hr1G039790	2010	2430	3614	3668	3122	2863	1273	1902	3453	2405	1902	2700	2373	2139	1620	2579
HORVU1Hr1G039810	0	1	0	0	0	0	0	0	0	0	0	0	0	0	0	0
HORVU1Hr1G039820	4	0	0	3	457	53	22	45	6	4	45	57	76	15	42	34
HORVU1Hr1G039830	1	2	2	0	127	3	0	1	722	817	1058	1083	1590	1083	1028	690
HORVU1Hr1G039870	2107	2051	2430	1746	1059	1115	826	779	1293	1183	903	1054	791	754	587	765
HORVU1Hr1G039880	414	758	1234	1109	893	830	392	714	797	439	530	968	758	703	539	889
HORVU1Hr1G039930	0	4	9	17	8	4	0	5	9	0	7	21	13	2	7	17
HORVU1Hr1G039940	0	0	5	8	5	1	0	6	7	0	5	15	5	1	7	3
HORVU1Hr1G040050	445	507	690	778	588	484	258	306	536	374	463	661	666	595	338	1051
HORVU1Hr1G040060	0	0	0	0	0	0	0	0	0	0	0	0	0	0	0	0
HORVU1Hr1G040070	0	2	6	8	7	2	5	6	5	4	2	16	4	3	5	10
HORVU1Hr1G040110	274	298	321	417	397	343	142	216	489	408	345	355	267	239	176	276
HORVU1Hr1G040130	25	36	53	82	53	45	32	31	54	39	51	75	44	42	35	29
HORVU1Hr1G040140	5	2	7	10	2	2	0	0	3	2	3	0	4	6	1	4
HORVU1Hr1G040150	1	0	0	9	0	4	0	0	1	1	2	0	0	1	1	0
HORVU1Hr1G040160	1006	1501	1503	1531	1279	1337	1385	1397	1065	841	1175	1499	1672	1547	1150	2454
HORVU1Hr1G040170	464	681	674	685	577	639	649	661	448	373	509	665	698	621	520	959
HORVU1Hr1G040180	12	19	20	15	21	8	1	16	22	27	42	39	81	82	25	154
HORVU1Hr1G040200	32	76	89	77	70	66	15	49	74	46	54	120	126	74	78	146
HORVU1Hr1G040250	140	233	312	303	313	219	84	208	275	198	244	387	390	278	269	440
HORVU1Hr1G040260	16	22	35	32	39	30	5	24	25	18	31	41	41	19	23	33
HORVU1Hr1G040300	6	9	11	13	15	2	7	20	6	7	5	14	12	9	7	14
HORVU1Hr1G040310	0	0	3	3	2	0	0	0	4	3	3	3	1	0	4	3
HORVU1Hr1G040320	0	0	0	0	0	0	0	0	0	0	0	0	0	0	0	0
HORVU1Hr1G040330	19	10	7	9	7	4	9	5	12	5	5	14	9	8	5	16
HORVU1Hr1G040370	0	0	0	0	0	0	0	0	0	0	0	0	1	0	0	0
HORVU1Hr1G040420	0	0	3	0	52	0	5	63	0	1	16	17	81	234	7	401
HORVU1Hr1G040450	1169	1917	2680	2759	2324	2080	1107	1714	1871	1357	1329	2024	2270	1808	1388	2630
HORVU1Hr1G040540	38	78	118	98	80	60	38	22	84	52	40	71	83	47	74	53
HORVU1Hr1G040560	2598	4113	5447	5835	3498	2997	761	1464	3159	1959	1853	3568	3075	2131	2126	3038
HORVU1Hr1G040620	106	76	32	23	6	4	3	0	0	7	2	2	8	2	0	2
HORVU1Hr1G040640	0	0	0	0	0	0	0	0	0	0	0	0	0	0	0	0
HORVU1Hr1G040660	1645	1934	2748	2992	2755	2416	1676	1922	3022	2406	2598	2855	2609	2134	2020	2525
HORVU1Hr1G040670	712	1244	1742	1931	991	933	370	751	921	585	771	1231	819	626	590	834
HORVU1Hr1G040700	284	466	932	754	568	363	191	357	536	321	300	592	551	389	304	790
HORVU1Hr1G040720	866	1349	2066	625	633	485	390	467	861	934	1079	992	1615	1113	460	2286
HORVU1Hr1G040740	0	0	0	0	0	0	0	0	0	0	0	0	0	0	0	0
HORVU1Hr1G040800	7	2	5	0	4	3	5	2	5	3	1	3	2	1	1	4
HORVU1Hr1G040810	0	1	2	1	0	2	0	0	3	1	3	1	2	1	1	0
HORVU1Hr1G040850	667	699	860	633	424	308	198	216	457	394	381	544	534	425	233	752
HORVU1Hr1G040920	35	30	21	37	27	21	22	14	72	67	53	51	31	36	41	40
HORVU1Hr1G040930	1249	1339	1868	1603	1149	1165	887	809	1454	1203	1004	1299	998	1092	736	1225
HORVU1Hr1G040940	87	159	188	209	144	93	42	41	123	71	75	153	130	78	72	79
HORVU1Hr1G040950	39	37	32	35	25	15	19	26	51	50	44	45	41	53	29	102
HORVU1Hr1G040970	7	15	9	19	6	9	0	3	4	1	3	4	4	0	0	0
HORVU1Hr1G040980	1217	1763	2627	2229	1499	1237	699	1024	1560	1041	1089	2073	1651	1365	1047	2201
HORVU1Hr1G041020	59	49	53	52	50	38	34	55	80	50	77	133	87	68	34	103
HORVU1Hr1G041030	664	783	1294	1546	1113	913	501	600	1251	774	728	1138	871	810	648	1191
HORVU1Hr1G041060	1816	2186	3178	3382	2950	2273	1500	1915	3177	2402	2279	3527	3452	2650	2096	3791
HORVU1Hr1G041110	175	268	287	284	224	191	126	168	198	165	141	187	284	188	116	379
HORVU1Hr1G041150	776	1341	2477	2507	1876	1343	644	1098	1494	837	1076	1970	1636	1229	1061	1911
HORVU1Hr1G041170	0	0	0	0	0	0	0	0	0	0	0	2	0	0	1	0
HORVU1Hr1G041220	318	246	411	454	296	260	181	116	407	301	257	409	219	205	184	252
HORVU1Hr1G041240	0	1	0	0	0	0	0	0	0	0	1	0	0	0	1	1
HORVU1Hr1G041250	20996	19286	21415	19538	12938	13862	10642	9449	12370	11836	11628	12584	13110	11847	7913	14408
HORVU1Hr1G041260	0	0	0	0	0	0	0	0	0	0	0	0	0	0	0	0
HORVU1Hr1G041280	28	29	19	9	5	1	6	0	10	11	15	4	11	2	3	7
HORVU1Hr1G041310	0	0	0	0	0	0	0	0	0	0	0	0	0	0	0	0
HORVU1Hr1G041320	8	49	86	93	99	85	11	70	65	52	52	59	65	56	63	57
HORVU1Hr1G041340	0	0	0	0	0	0	0	0	0	0	0	0	0	0	0	0
HORVU1Hr1G041350	0	0	0	0	2	0	0	2	0	0	0	0	0	0	0	0
HORVU1Hr1G041360	0	0	0	0	0	0	0	0	0	0	0	0	0	0	0	0
HORVU1Hr1G041370	0	0	0	0	0	0	0	0	0	0	0	0	0	0	0	0
HORVU1Hr1G041400	0	0	0	0	0	0	0	0	0	0	0	0	0	0	0	0
HORVU1Hr1G041410	0	0	0	0	0	0	0	0	0	0	0	0	0	0	0	0
HORVU1Hr1G041430	0	0	0	0	0	0	0	0	0	0	0	0	0	0	0	0
HORVU1Hr1G041440	255	276	421	355	253	197	176	175	394	316	295	285	225	220	156	271
HORVU1Hr1G041480	6	22	37	61	47	20	3	21	17	15	18	49	49	14	13	39
HORVU1Hr1G041490	15	33	69	84	60	34	7	26	29	19	26	63	77	28	25	61
HORVU1Hr1G041500	1	8	14	32	20	15	1	12	3	3	12	20	22	8	6	13
HORVU1Hr1G041510	0	0	0	0	0	0	0	0	0	0	0	0	0	0	0	0
HORVU1Hr1G041530	73	69	73	85	103	38	63	67	108	98	197	165	341	247	52	614
HORVU1Hr1G041580	0	2	4	0	3	2	0	0	5	3	5	4	13	3	3	8
HORVU1Hr1G041630	269	317	469	439	392	343	175	236	357	216	260	334	285	270	256	305
HORVU1Hr1G041650	146	175	297	398	282	249	90	152	485	226	262	630	234	233	196	353
HORVU1Hr1G041710	805	797	941	1018	713	694	352	382	1036	681	661	854	555	674	397	763
HORVU1Hr1G041720	1462	1742	1293	1152	788	642	208	334	1592	1434	1526	1784	1119	1164	1116	1473
HORVU1Hr1G041740	1086	1521	1915	1529	1109	979	987	1255	1053	765	951	1512	1474	1181	906	2000
HORVU1Hr1G041770	387	436	566	548	659	467	276	469	499	477	450	631	698	480	300	806
HORVU1Hr1G041790	1553	1741	2689	2482	2347	1623	1723	2666	1943	1538	1857	2385	2936	2100	1766	3852
HORVU1Hr1G041810	18	33	46	18	8	19	14	18	13	9	11	20	29	17	6	36
HORVU1Hr1G041820	76	91	91	148	114	101	72	233	96	101	79	129	206	104	117	259
HORVU1Hr1G041830	57	65	66	68	63	57	69	32	93	78	73	71	56	55	37	72
HORVU1Hr1G041860	15	1	9	8	37	29	23	39	21	16	7	19	31	48	55	58
HORVU1Hr1G041890	444	438	432	271	221	224	175	100	504	224	254	126	301	278	72	354
HORVU1Hr1G041910	154	220	475	548	453	268	214	236	462	257	304	577	394	336	333	600
HORVU1Hr1G041950	9	19	14	33	22	20	18	14	45	25	29	34	20	16	25	29
HORVU1Hr1G041960	2	0	1	3	5	0	0	1	0	0	1	0	42	15	1	32
HORVU1Hr1G041970	1535	1468	1778	1489	1097	988	947	828	1181	1086	962	1249	1024	1025	627	1401
HORVU1Hr1G041980	0	0	0	0	1	0	0	0	0	0	0	1	0	0	0	0
HORVU1Hr1G041990	1154	973	1278	1186	1808	1724	1329	1215	1362	951	666	826	928	809	676	869
HORVU1Hr1G042020	423	509	605	539	266	284	165	177	347	307	323	484	354	294	200	362
HORVU1Hr1G042030	9333	7062	7192	5513	4853	5477	1491	3452	5196	3542	3811	3195	4007	2711	1986	2534
HORVU1Hr1G042050	2293	3207	4058	3810	2367	2029	989	1711	2187	1424	1936	3112	3742	2257	1631	3433
HORVU1Hr1G042060	1181	1899	3331	2638	1705	1870	1381	2201	1265	764	1294	2022	2207	1472	1285	2773
HORVU1Hr1G042130	0	0	0	0	0	0	0	0	0	0	0	0	0	0	0	0
HORVU1Hr1G042140	574	712	1075	1152	899	741	262	554	783	540	606	930	799	616	509	1125
HORVU1Hr1G042180	0	0	0	1	0	0	0	0	0	0	0	0	0	2	0	0
HORVU1Hr1G042210	15	9	11	14	20	13	6	5	17	14	12	13	27	11	17	27
HORVU1Hr1G042220	2883	2744	2977	2279	1336	1429	1686	1418	2253	2120	1833	2109	2073	1800	1024	2567
HORVU1Hr1G042250	155	113	202	80	146	186	123	62	285	180	135	183	229	205	193	126
HORVU1Hr1G042270	3370	3523	4342	3301	2671	2917	2674	2063	4149	3524	3231	3497	3615	3940	2447	5287
HORVU1Hr1G042280	413	303	379	422	394	351	193	234	564	416	380	623	345	381	236	459
HORVU1Hr1G042290	12	20	24	50	45	39	8	16	33	14	20	32	52	23	31	48
HORVU1Hr1G042330	0	0	0	0	0	0	0	0	0	0	0	0	0	0	0	0
HORVU1Hr1G042340	21	37	22	21	27	36	5	11	31	26	33	22	23	29	10	25
HORVU1Hr1G042350	388	428	487	579	490	461	329	297	591	422	363	483	405	407	264	497
HORVU1Hr1G042360	16	5	5	3	6	5	9	6	12	8	4	5	7	6	1	7
HORVU1Hr1G042370	33	47	93	82	144	108	107	116	341	245	272	418	283	360	239	555
HORVU1Hr1G042420	557	512	660	512	432	396	296	279	531	426	444	462	418	347	271	574
HORVU1Hr1G042440	46	56	83	86	56	64	18	46	85	63	66	86	71	56	29	88
HORVU1Hr1G042450	83	94	140	94	49	50	46	34	107	96	81	108	85	90	42	105
HORVU1Hr1G042490	849	1034	1363	1152	1067	942	789	969	993	802	843	901	1330	1100	705	2018
HORVU1Hr1G042510	17	26	27	19	17	30	15	18	23	7	6	15	20	14	7	5
HORVU1Hr1G042520	208	235	336	265	139	134	88	79	290	214	183	262	155	138	119	149
HORVU1Hr1G042530	11	23	31	31	24	12	5	15	30	17	34	23	22	17	17	24
HORVU1Hr1G042540	2	1	4	2	0	0	3	0	2	0	3	1	0	0	1	1
HORVU1Hr1G042550	687	1046	1328	1508	1312	1265	496	757	1397	1071	884	1271	1167	1083	803	1378
HORVU1Hr1G042560	356	629	1152	986	683	560	247	313	657	370	455	835	657	497	452	826
HORVU1Hr1G042590	0	2	1	1	1	0	2	1	2	0	0	0	5	1	2	0
HORVU1Hr1G042600	3	0	5	3	2	4	4	2	3	2	2	4	2	2	1	4
HORVU1Hr1G042610	0	1	0	0	1	1	0	0	0	0	0	1	0	0	0	0
HORVU1Hr1G042650	4831	6808	8397	7005	6067	5496	2615	4033	5347	3272	2896	3915	4716	3820	2870	5124
HORVU1Hr1G042690	215	296	335	265	167	162	109	131	204	157	153	209	194	169	114	267
HORVU1Hr1G042710	77	191	402	618	730	522	69	245	640	225	243	430	365	231	233	276
HORVU1Hr1G042740	0	0	0	1	2	0	0	0	0	0	2	1	1	1	1	0
HORVU1Hr1G042770	19	28	18	5	2	1	1	1	11	3	1	10	6	2	3	1
HORVU1Hr1G042800	0	2	1	5	1	0	0	0	4	0	0	2	1	2	1	0
HORVU1Hr1G042810	375	412	524	559	480	325	344	253	667	604	459	612	959	592	309	929
HORVU1Hr1G042820	375	411	523	559	456	325	344	251	667	604	457	612	718	581	309	914
HORVU1Hr1G042840	0	0	0	0	0	0	0	0	0	0	0	0	0	0	0	0
HORVU1Hr1G042870	47	117	201	156	158	59	29	31	191	97	126	245	225	147	70	329
HORVU1Hr1G042910	19	23	27	41	37	28	49	33	59	41	32	51	37	34	34	34
HORVU1Hr1G042920	1647	2310	3555	2895	1486	1449	1187	1042	1506	1283	1428	1961	1215	1284	846	1451
HORVU1Hr1G042990	0	0	0	0	0	0	0	0	0	0	0	0	0	0	0	0
HORVU1Hr1G043040	113	93	127	187	175	183	121	125	152	99	69	113	80	104	62	111
HORVU1Hr1G043050	22	9	22	25	26	16	15	18	35	21	20	32	16	29	16	17
HORVU1Hr1G043080	1	0	0	0	0	0	0	0	0	5	1	2	1	1	1	0
HORVU1Hr1G043090	1	1	2	2	0	0	2	1	2	1	1	1	3	0	0	4
HORVU1Hr1G043110	1339	1404	1731	1670	1083	1189	555	716	1213	956	896	1368	850	882	748	994
HORVU1Hr1G043130	2	9	12	9	3	7	8	5	9	2	2	8	6	4	4	3
HORVU1Hr1G043140	0	0	0	0	0	0	0	1	0	0	0	1	0	0	0	0
HORVU1Hr1G043150	251	303	417	544	438	334	157	255	466	326	314	546	391	369	307	517
HORVU1Hr1G043190	31	42	43	50	36	50	21	23	14	14	15	28	33	17	20	15
HORVU1Hr1G043200	25	36	41	59	38	43	10	29	43	50	41	56	32	40	26	44
HORVU1Hr1G043220	343	379	470	427	280	344	236	275	277	201	236	264	229	179	158	244
HORVU1Hr1G043250	544	486	595	510	349	369	342	231	651	518	549	640	426	528	372	682
HORVU1Hr1G043280	636	1310	2346	2656	2967	1732	436	1214	1849	1075	1520	2718	3282	2047	1658	4997
HORVU1Hr1G043320	0	2	0	2	2	1	0	5	1	0	0	1	1	3	5	0
HORVU1Hr1G043360	0	1	1	0	2	0	4	0	2	0	2	3	3	0	0	0
HORVU1Hr1G043380	1718	1133	732	1298	754	969	184	192	1930	1752	689	529	282	347	264	148
HORVU1Hr1G043430	0	2	1	1	0	1	0	0	0	0	1	2	0	0	0	0
HORVU1Hr1G043440	3770	4645	6086	5182	4471	4553	3561	4492	4186	3312	3246	4105	5214	3544	3862	3691
HORVU1Hr1G043450	0	0	1	0	0	1	0	0	0	1	0	0	0	0	0	0
HORVU1Hr1G043470	0	0	1	0	0	0	0	0	0	0	0	0	0	0	0	0
HORVU1Hr1G043480	22	49	52	47	14	23	11	7	14	37	30	36	23	21	26	27
HORVU1Hr1G043500	22	67	33	31	4	3	1	4	12	6	9	12	8	4	1	6
[truncated: 37,843 more rows]
